# Supplementary material for: Flura-seq identifies organ-specific metabolic adaptations during early metastatic colonization
Source: eLife journal article supplement (doi:10.7554/elife.43627), 2019-03-25
Supplement: supp [file elife-43627-supp-v1.zip]

Archive with 12 entries (12 files):
- elife_poa_e43627_Figure_5_figure_supplement_1.pdf
- elife_poa_e43627_Supplementary_File_4.xlsx
- elife_poa_e43627_Figure_3_figure_supplement_1.pdf
- elife_poa_e43627_Figure_1_figure_supplement_1.pdf
- elife_poa_e43627_Supplementary_File_2.xlsx
- elife_poa_e43627_Figure_5_figure_supplement_2.pdf
- elife_poa_e43627_Supplementary_File_5.xlsx
- elife_poa_e43627_Transparent_Reporting_File.docx
- elife_poa_e43627_Supplementary_File_1.xls
- elife_poa_e43627_Figure_4_figure_supplement_1.pdf
- elife_poa_e43627_Supplementary_File_6.xlsx
- elife_poa_e43627_Supplementary_File_3.xlsx
