# Supplementary material for: Flura-seq identifies organ-specific metabolic adaptations during early metastatic colonization
Source: eLife journal article supplement (doi:10.7554/elife.43627), 2019-03-25
Supplement: supp [file elife-43627-supp-v1.zip › elife_poa_e43627_Figure_4_figure_supplement_1.pdf]

**A**

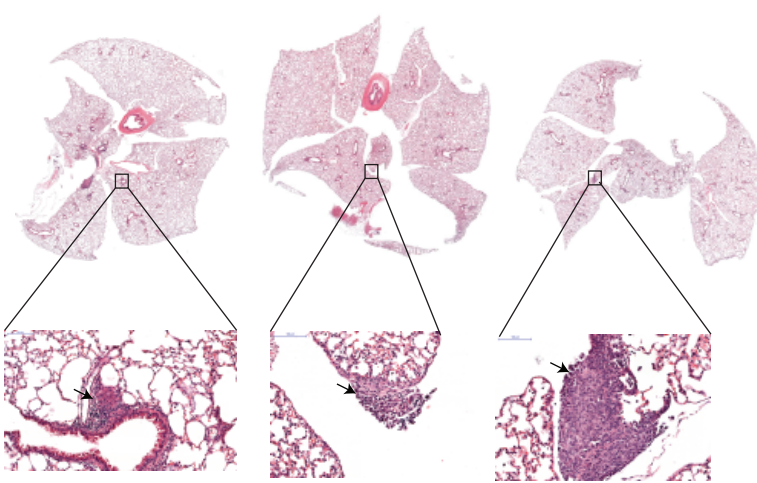

Lungs at 31 days after intracardiac injection  
of MDA231-CD/UPRT cells

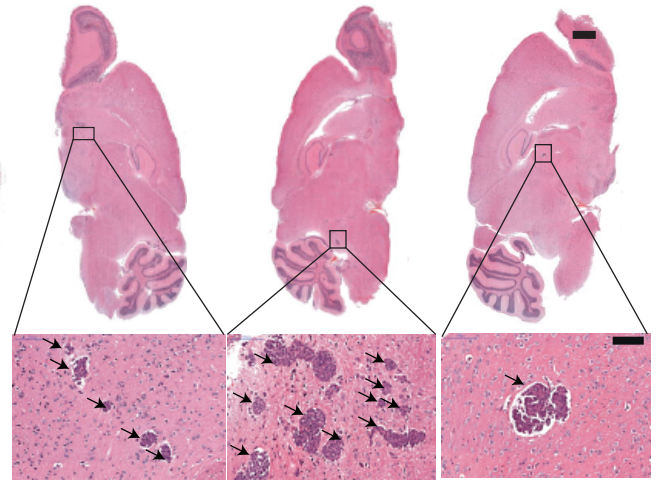

Brains at 31 days after intracardiac injection  
of MDA231-CD/UPRT cells
