# Supplementary material for: Flura-seq identifies organ-specific metabolic adaptations during early metastatic colonization
Source: eLife journal article supplement (doi:10.7554/elife.43627), 2019-03-25
Supplement: supp [file elife-43627-supp-v1.zip › elife_poa_e43627_Supplementary_File_1.xls]

## Sheet: Control vs. 50μM 5-FC _DEGs
Official Gene Symbol	baseMean	log2FoldChange	lfcSE	stat	pvalue	padj
PPP1R10	11190.2	1.5401	0.167755	9.18065	4.29e-20	2.05e-16
ZC3H4	5608.19	1.34434	0.263617	5.09957	3.4e-07	9.58e-05
BIRC3	4718.58	1.20285	0.23705	5.07425	3.89e-07	0.000107386
C10orf12	3251.13	1.36038	0.196274	6.93103	4.18e-12	5e-09
TIMM10B	3077.57	1.13735	0.202059	5.62882	1.81e-08	8.98e-06
TMPPE	1107.03	1.66563	0.186218	8.9445	3.74e-19	1.07e-15
PEX12	1053.54	1.09005	0.217163	5.01953	5.18e-07	0.000137637
ZNF586	1029.23	1.30368	0.225468	5.78208	7.38e-09	4.07e-06
NEURL1B	786.273	-1.23217	0.17624	-6.99145	2.72e-12	3.55e-09
POMK	762.107	1.07402	0.191576	5.6062	2.07e-08	9.84e-06
PFKFB4	736.888	-1.12497	0.217103	-5.18174	2.2e-07	7.17e-05
ZNF587B	736.109	1.11541	0.253089	4.40721	1.05e-05	0.00156562
ZNF616	610.541	1.33092	0.247699	5.37315	7.74e-08	2.85e-05
TIGD1	536.547	1.18551	0.246038	4.81841	1.45e-06	0.000324543
DRP2	520.702	1.57964	0.211443	7.47075	7.97e-14	1.14e-10
C7orf13	501.561	1.12428	0.210064	5.35209	8.69e-08	3.12e-05
MYO3A	481.897	1.34361	0.239863	5.60157	2.12e-08	9.84e-06
VIM-AS1	460.848	1.09258	0.25509	4.28311	1.84e-05	0.00259359
LOC90834	400.387	2.7971	0.262236	10.6664	1.46e-26	1.05e-22
AQPEP	359.927	1.8723	0.297815	6.2868	3.24e-10	3.58e-07
FBXL19-AS1	348.249	1.00291	0.20899	4.79886	1.6e-06	0.000341863
SNORD57	342.285	1.73848	0.231822	7.49919	6.42e-14	1.02e-10
GPR83	304.787	1.6241	0.270164	6.01155	1.84e-09	1.32e-06
LSMEM1	304.061	1.76613	0.298664	5.91344	3.35e-09	2.19e-06
P2RX5-TAX1BP3	295.458	1.83808	0.242883	7.56778	3.8e-14	6.81e-11
PDCD1LG2	293.235	1.02519	0.212996	4.81317	1.49e-06	0.000328051
STARD8	284.599	-1.08257	0.243444	-4.44688	8.71e-06	0.00137427
TMEM75	273.724	3.30971	0.296463	11.164	6.12e-29	8.78e-25
RCSD1	253.563	-1.77997	0.219761	-8.09958	5.52e-16	1.32e-12
NNAT	249.953	1.14161	0.237568	4.80542	1.54e-06	0.000335855
PDXDC2P	216.604	-1.01176	0.26655	-3.79577	0.000147184	0.012727
ELAC1	212.496	1.13892	0.264665	4.30327	1.68e-05	0.00239185
MGC16275	205.03	1.04315	0.266802	3.90983	9.24e-05	0.00883843
SLC25A18	195.614	1.58642	0.277465	5.71755	1.08e-08	5.75e-06
TSACC	181.32	1.25571	0.245021	5.1249	2.98e-07	9.09e-05
TAPT1-AS1	173.791	1.44761	0.28151	5.14232	2.71e-07	8.47e-05
WNT2B	171.799	1.14298	0.271422	4.21108	2.54e-05	0.00328657
LINC01011	162.548	1.01068	0.260076	3.88611	0.000101865	0.00942259
DCAF4L1	160.42	1.76582	0.320116	5.51618	3.46e-08	1.46e-05
PAQR8	159.826	-1.44668	0.242336	-5.9697	2.38e-09	1.62e-06
RMRP	154.807	1.36358	0.37945	3.59357	0.000326177	0.0247722
SYTL5	150.469	1.09718	0.285768	3.8394	0.000123334	0.0111342
LOC100268168	149.95	1.18218	0.293681	4.02538	5.69e-05	0.00623289
LINC00211	146.82	2.79161	0.305495	9.13801	6.36e-20	2.28e-16
KDM4D	145.568	1.06824	0.263297	4.05718	4.97e-05	0.00552675
LNP1	143.054	1.76741	0.281946	6.2686	3.64e-10	3.74e-07
KCNE1L	141.697	1.76922	0.293935	6.0191	1.75e-09	1.32e-06
LOC100653515	137.495	1.88705	0.343911	5.48703	4.09e-08	1.68e-05
ZC3H6	131.941	1.44136	0.274334	5.25405	1.49e-07	5.09e-05
SERPINC1	130.504	2.50113	0.321382	7.7824	7.12e-15	1.46e-11
PRLR	130.378	1.12431	0.286272	3.92741	8.59e-05	0.00838457
RIBC2	119.074	1.07002	0.268535	3.98468	6.76e-05	0.00692808
C11orf48	116.426	1.20011	0.248735	4.82487	1.4e-06	0.000324543
SLCO4C1	114.691	-1.67371	0.300124	-5.57673	2.45e-08	1.1e-05
GLI2	113.58	-1.17995	0.302326	-3.90291	9.5e-05	0.00903472
SPDYA	112.601	1.80675	0.340267	5.30981	1.1e-07	3.84e-05
C1orf220	109.9	1.15307	0.290982	3.96267	7.41e-05	0.00749049
IMPG2	107.646	1.37133	0.302164	4.53838	5.67e-06	0.000992321
LOC100287098	104.048	1.16611	0.338779	3.44208	0.000577251	0.0373938
CXCL3	103.189	1.30577	0.289171	4.51556	6.31e-06	0.0010664
COX10-AS1	102.538	-1.10371	0.258646	-4.26725	1.98e-05	0.00270535
FAM117A	100.577	-1.11263	0.315423	-3.52743	0.00041961	0.0295697
FRZB	100.13	2.06585	0.33644	6.14032	8.24e-10	7.08e-07
SNORD34	99.2736	1.7403	0.340921	5.10471	3.31e-07	9.51e-05
ZC3H12D	98.4774	2.043	0.332873	6.13749	8.38e-10	7.08e-07
NEB	96.9356	1.32488	0.334477	3.96104	7.46e-05	0.00749049
NEK10	91.7942	1.66081	0.330908	5.01897	5.2e-07	0.000137637
CTTNBP2	90.0157	1.88881	0.350476	5.38928	7.07e-08	2.74e-05
ANKRD26P1	89.1295	2.06385	0.330357	6.24732	4.18e-10	4e-07
SPON1	88.655	1.43851	0.308205	4.6674	3.05e-06	0.000561352
CCDC13	86.8306	1.57828	0.327468	4.81964	1.44e-06	0.000324543
SNORA48	83.1893	1.43384	0.310477	4.61818	3.87e-06	0.000703381
ZNF876P	76.4378	2.02426	0.3494	5.79352	6.89e-09	3.96e-06
NME9	76.3279	2.05313	0.33997	6.03916	1.55e-09	1.24e-06
RARA-AS1	72.277	1.22792	0.316822	3.87575	0.000106297	0.00971836
FAM177B	68.9203	1.98954	0.350967	5.66875	1.44e-08	7.37e-06
LOC100128494	64.7709	1.06424	0.312385	3.40682	0.000657236	0.0407676
PSD4	62.7683	-1.14986	0.327548	-3.5105	0.000447272	0.0305721
LOC100129931	61.6994	1.80959	0.350443	5.16372	2.42e-07	7.72e-05
FBXW4P1	61.2377	1.4298	0.355951	4.01686	5.9e-05	0.00631786
MIR503HG	57.6307	-1.04675	0.309739	-3.37946	0.000726287	0.0436198
LOC155060	56.5809	-1.28267	0.324558	-3.95204	7.75e-05	0.00767073
HOXB3	55.6738	-1.0208	0.303497	-3.36346	0.000769711	0.0460352
UNC13A	52.9182	1.2876	0.322738	3.98961	6.62e-05	0.00683763
SRRM5	52.3828	1.25162	0.355255	3.52316	0.000426427	0.0295697
SLC26A3	52.0116	1.73872	0.368568	4.71749	2.39e-06	0.000463154
FAM212B	48.4812	-1.1508	0.312931	-3.67751	0.000235525	0.0187818
SNORA71A	48.0584	1.51186	0.356747	4.2379	2.26e-05	0.00297119
ZNF610	47.9802	1.70853	0.352477	4.84722	1.25e-06	0.00030461
PKDREJ	47.8719	2.04746	0.352687	5.80532	6.42e-09	3.84e-06
SNORD88C	47.6233	1.36362	0.358334	3.80544	0.000141552	0.0123892
MAMSTR	44.4585	-1.13171	0.328835	-3.44158	0.000578335	0.0373938
NGF	44.4093	-1.64944	0.342013	-4.82274	1.42e-06	0.000324543
CCDC81	44.2717	1.30562	0.357006	3.65712	0.000255061	0.0201162
SYT2	43.1037	-1.32045	0.332563	-3.97054	7.17e-05	0.00730014
FAM71F2	41.5692	1.52001	0.353183	4.30374	1.68e-05	0.00239185
C2orf66	37.7756	1.32957	0.371613	3.57782	0.000346468	0.0259446
LOC101927354	35.4831	1.54021	0.364994	4.21982	2.44e-05	0.00319041
IL12RB2	35.446	1.29536	0.374132	3.46231	0.00053556	0.0357555
BAAT	35.402	1.27173	0.37207	3.41798	0.000630883	0.039718
LOC100129617	32.3017	1.43923	0.359319	4.00543	6.19e-05	0.00658214
MYOZ3	32.0348	1.55443	0.375267	4.14221	3.44e-05	0.00425646
SNORA13	30.6961	1.25242	0.36486	3.43261	0.000597801	0.038137
EHMT1-IT1	28.3435	1.82594	0.382537	4.77323	1.81e-06	0.000380578
SMAD5-AS1	26.635	1.32699	0.37642	3.5253	0.000423005	0.0295697
SLC16A12	23.9746	1.35354	0.378862	3.57265	0.000353383	0.0260644
OR2M2	23.9138	1.9235	0.37657	5.10794	3.26e-07	9.51e-05
GATA3-AS1	22.7822	1.36319	0.37979	3.58932	0.00033154	0.025047
UNC5C	21.1069	1.27273	0.381442	3.33663	0.000848	0.0492067
CHRNB2	20.2224	1.54567	0.38077	4.05933	4.92e-05	0.00551889
SYNDIG1	18.5161	-1.2978	0.383997	-3.3797	0.000725638	0.0436198
TSPY26P	14.5938	1.3694	0.384117	3.56506	0.00036377	0.0266406
KIAA1644	10.9281	-1.82335	0.382192	-4.77077	1.84e-06	0.000380578

## Sheet: Control vs. 250μM 5-FC _DEGs
Official Gene Symbol	baseMean	log2FoldChange	lfcSE	stat	pvalue	padj
TMEM75	273.724	3.26087	0.296905	10.9829	4.62e-28	6.81e-24
LINC00211	146.82	3.02771	0.304881	9.93079	3.06e-23	1.5e-19
LOC90834	400.387	2.82353	0.262321	10.7636	5.11e-27	3.77e-23
SERPINC1	130.504	2.62647	0.321017	8.18173	2.8e-16	6.88e-13
LOC100653515	137.495	2.51215	0.340644	7.37471	1.65e-13	2.21e-10
ANKRD26P1	89.1295	2.41881	0.328554	7.36199	1.81e-13	2.23e-10
PKDREJ	47.8719	2.40496	0.351642	6.83923	7.96e-12	7.83e-09
MYOZ3	32.0348	2.27492	0.372718	6.1036	1.04e-09	4.78e-07
AQPEP	359.927	2.14652	0.296629	7.23639	4.61e-13	5.23e-10
OR2M2	23.9138	2.10849	0.376214	5.6045	2.09e-08	6.42e-06
SPDYA	112.601	2.08942	0.339311	6.15783	7.38e-10	3.75e-07
CTTNBP2	90.0157	2.0693	0.35013	5.9101	3.42e-09	1.29e-06
NME9	76.3279	2.05374	0.340474	6.03199	1.62e-09	7.02e-07
ZNF876P	76.4378	2.02336	0.349717	5.78571	7.22e-09	2.6e-06
KCNE1L	141.697	1.99244	0.29285	6.8036	1.02e-11	9.4e-09
CCDC13	86.8306	1.9667	0.324812	6.0549	1.41e-09	6.28e-07
FAM177B	68.9203	1.95081	0.351843	5.54455	2.95e-08	8.52e-06
P2RX5-TAX1BP3	295.458	1.94211	0.242784	7.99933	1.25e-15	2.05e-12
TAPT1-AS1	173.791	1.93264	0.279329	6.91887	4.55e-12	4.8e-09
LOC100129931	61.6994	1.86795	0.350485	5.3296	9.84e-08	2.38e-05
ZC3H12D	98.4774	1.84588	0.334896	5.51181	3.55e-08	9.88e-06
TMPPE	1107.03	1.83243	0.186021	9.85066	6.81e-23	2.01e-19
SLC25A18	195.614	1.8313	0.275976	6.63573	3.23e-11	2.51e-08
DCAF4L1	160.42	1.78546	0.320271	5.57485	2.48e-08	7.46e-06
LNP1	143.054	1.78242	0.282117	6.31802	2.65e-10	1.57e-07
CASC1	32.3466	1.74587	0.371463	4.69999	2.6e-06	0.000358555
SLC26A3	52.0116	1.73664	0.368941	4.70708	2.51e-06	0.000349574
FRZB	100.13	1.72609	0.339744	5.08057	3.76e-07	7.02e-05
GPR83	304.787	1.72433	0.270028	6.38574	1.71e-10	1.14e-07
WNT4	45.5977	1.71019	0.366256	4.66938	3.02e-06	0.000390776
NEK10	91.7942	1.70916	0.331025	5.16322	2.43e-07	5.02e-05
EHMT1-IT1	28.3435	1.70731	0.382761	4.46051	8.18e-06	0.000883929
PPP1R10	11190.2	1.65353	0.16775	9.85711	6.39e-23	2.01e-19
LSMEM1	304.061	1.61513	0.299381	5.39489	6.86e-08	1.71e-05
ZC3H4	5608.19	1.61128	0.263595	6.1127	9.8e-10	4.66e-07
CCDC81	44.2717	1.59947	0.355336	4.50128	6.75e-06	0.00076617
ZNF610	47.9802	1.57596	0.353319	4.46044	8.18e-06	0.000883929
ZC3H6	131.941	1.57391	0.274006	5.74406	9.24e-09	3.1e-06
FAM71F2	41.5692	1.56362	0.353317	4.42555	9.62e-06	0.000998974
SLC16A12	23.9746	1.5522	0.378482	4.10112	4.11e-05	0.00336831
MYO3A	481.897	1.54319	0.239524	6.44272	1.17e-10	8.24e-08
TSPY26P	14.5938	1.52819	0.384072	3.97893	6.92e-05	0.00497955
CXCL3	103.189	1.52626	0.288445	5.29134	1.21e-07	2.75e-05
SNORD34	99.2736	1.52305	0.341701	4.45727	8.3e-06	0.000883929
ZNF616	610.541	1.47257	0.247602	5.94732	2.73e-09	1.09e-06
C10orf12	3251.13	1.46537	0.196253	7.46675	8.22e-14	1.21e-10
LINC01140	52.3803	1.46213	0.348794	4.19197	2.77e-05	0.00246924
MMP9	73.679	1.44311	0.357772	4.03359	5.49e-05	0.00421876
GATA3-AS1	22.7822	1.43087	0.379781	3.76763	0.000164807	0.010001
DRP2	520.702	1.42559	0.212282	6.71556	1.87e-11	1.53e-08
BAAT	35.402	1.41962	0.371771	3.81855	0.00013424	0.00849574
ST8SIA1	28.6809	1.41777	0.375745	3.77324	0.000161142	0.00985976
ZNF586	1029.23	1.40847	0.225424	6.2481	4.15e-10	2.36e-07
FBXW4P1	61.2377	1.40226	0.356526	3.93313	8.38e-05	0.0059158
SNAP25	34.4428	1.39803	0.360157	3.88171	0.000103724	0.00688968
LOC400684	179.372	1.38545	0.298305	4.64441	3.41e-06	0.000437323
ADAM32	76.929	1.38289	0.329983	4.1908	2.78e-05	0.00246924
NEB	96.9356	1.38054	0.33452	4.12694	3.68e-05	0.00306274
UNC13A	52.9182	1.3601	0.322688	4.2149	2.5e-05	0.00227456
KDM4D	145.568	1.35506	0.262545	5.16126	2.45e-07	5.02e-05
SLC28A3	59.6883	1.35374	0.3456	3.91708	8.96e-05	0.00623435
VIM-AS1	460.848	1.33616	0.254834	5.24326	1.58e-07	3.42e-05
ELAC1	212.496	1.33404	0.264232	5.04874	4.45e-07	8.1e-05
CHRNB2	20.2224	1.32986	0.381396	3.48682	0.000488805	0.0220426
C7orf13	501.561	1.29789	0.209843	6.18507	6.21e-10	3.27e-07
SNORA13	30.6961	1.28736	0.365028	3.52675	0.000420688	0.0198829
POMK	762.107	1.28606	0.191138	6.72842	1.72e-11	1.49e-08
ZNF460	453.993	1.28233	0.273501	4.68859	2.75e-06	0.000368778
LOC101927354	35.4831	1.28119	0.366854	3.49238	0.000478745	0.0217218
KBTBD8	949.631	1.2797	0.268534	4.76549	1.88e-06	0.000284667
ZNF587B	736.109	1.27398	0.25299	5.03569	4.76e-07	8.46e-05
C12orf79	24.9864	1.2685	0.373329	3.3978	0.0006793	0.0282168
SNORD57	342.285	1.26656	0.233926	5.41437	6.15e-08	1.62e-05
SLC10A1	30.0935	1.25699	0.382588	3.2855	0.00101803	0.0368842
SMAD5-AS1	26.635	1.24878	0.376835	3.31386	0.000920182	0.0342651
MIR6783	27.5994	1.24615	0.378111	3.29573	0.000981666	0.0361891
SLC3A1	55.2683	1.24096	0.335929	3.69411	0.000220658	0.0122696
TIMM10B	3077.57	1.23887	0.202042	6.13175	8.69e-10	4.27e-07
RARA-AS1	72.277	1.23052	0.317197	3.87936	0.000104732	0.00692545
IL12RB2	35.446	1.2302	0.374517	3.28476	0.00102071	0.0368905
CDO1	21.0886	1.22762	0.383764	3.1989	0.00137953	0.0453062
LOC101928053	16.2979	1.22762	0.383546	3.20071	0.00137087	0.0451413
BIRC3	4718.58	1.21916	0.237059	5.14285	2.71e-07	5.39e-05
IQUB	88.5589	1.21905	0.34805	3.50252	0.000460888	0.0213049
TDRD1	23.7427	1.21409	0.372542	3.25893	0.00111835	0.0396423
SYTL5	150.469	1.21297	0.285568	4.24757	2.16e-05	0.00199974
LINC-PINT	688.318	1.21059	0.206047	5.8753	4.22e-09	1.56e-06
MCF2	57.4471	1.19835	0.370663	3.23299	0.00122502	0.0421074
EID2B	325.873	1.19058	0.20614	5.77558	7.67e-09	2.69e-06
LOC100268168	149.95	1.18686	0.293861	4.03886	5.37e-05	0.00416443
ZNF367	5619.47	1.15846	0.201067	5.76158	8.33e-09	2.86e-06
ZNF805	1338.37	1.15743	0.238879	4.84525	1.26e-06	0.000202677
PEX12	1053.54	1.15487	0.217162	5.31802	1.05e-07	2.46e-05
SPON1	88.655	1.14215	0.31128	3.66921	0.0002433	0.012952
ZNF596	59.021	1.13981	0.340316	3.34927	0.00081024	0.0314412
ZNF660	36.6012	1.13444	0.338734	3.34907	0.000810836	0.0314412
ZNF816	548.37	1.12826	0.274311	4.11305	3.9e-05	0.0032166
RSRP1	1843.58	1.12758	0.181291	6.21972	4.98e-10	2.72e-07
SNORA48	83.1893	1.11433	0.312729	3.56324	0.000366306	0.0179453
IMPG2	107.646	1.11334	0.304773	3.65302	0.000259178	0.0136009
LRRC37A3	66.3124	1.11162	0.313464	3.54625	0.000390758	0.018767
DBNDD2	166.619	1.11077	0.272626	4.07433	4.61e-05	0.00367825
TIGD1	536.547	1.10553	0.24624	4.48966	7.13e-06	0.000797672
WNT2B	171.799	1.08504	0.27214	3.98707	6.69e-05	0.00488327
ZC3H12C	4594.6	1.07535	0.19905	5.40241	6.58e-08	1.67e-05
RBM14	10079.3	1.06414	0.273415	3.89202	9.94e-05	0.00669703
LOC100996579	852.155	1.05561	0.222414	4.74614	2.07e-06	0.000299748
MGC16275	205.03	1.04887	0.26705	3.92764	8.58e-05	0.00599518
LOC101927021	127.184	1.04032	0.290169	3.58524	0.000336773	0.0166089
NNAT	249.953	1.03411	0.238416	4.33742	1.44e-05	0.00140786
IL1RAPL1	723.347	1.03323	0.22031	4.68989	2.73e-06	0.000368778
FOXP2	215.695	1.03274	0.248337	4.15861	3.2e-05	0.00276957
MTRNR2L2	147.153	1.0309	0.319828	3.2233	0.00126722	0.0429573
ZBTB43	4194.63	1.02979	0.196029	5.25325	1.49e-07	3.29e-05
ZNF551	891.421	1.02157	0.232526	4.39334	1.12e-05	0.00113118
METTL12	258.294	1.02088	0.210654	4.84624	1.26e-06	0.000202677
SPATA2	1819.16	1.01961	0.224394	4.54385	5.52e-06	0.000641341
GPRASP1	121.471	1.01662	0.320837	3.16866	0.00153145	0.0488803
TNFRSF10D	8798.28	1.01507	0.15967	6.35729	2.05e-10	1.32e-07
LOC150381	380.892	1.00682	0.230761	4.36305	1.28e-05	0.00126935
LINC01011	162.548	1.00225	0.260428	3.84848	0.000118852	0.00772069
PLLP	183.615	-1.00234	0.25164	-3.98324	6.8e-05	0.0049281
TMCC3	1246.3	-1.00276	0.194219	-5.16301	2.43e-07	5.02e-05
ZNF681	66.9123	-1.00592	0.316841	-3.17486	0.00149911	0.0481642
LRCH3	721.137	-1.00868	0.187726	-5.37312	7.74e-08	1.9e-05
DNHD1	529.248	-1.01006	0.1971	-5.12458	2.98e-07	5.71e-05
FAM219A	527.302	-1.01463	0.197718	-5.13169	2.87e-07	5.57e-05
NYNRIN	103.149	-1.016	0.264456	-3.84185	0.000122112	0.00786316
DNAJC6	1074.84	-1.01623	0.215745	-4.71032	2.47e-06	0.000347344
SEC31B	313.019	-1.01657	0.226435	-4.48946	7.14e-06	0.000797672
DKFZP434I0714	99.153	-1.02644	0.282824	-3.62925	0.000284246	0.0146398
GPATCH2L	1516.6	-1.03193	0.187236	-5.51142	3.56e-08	9.88e-06
DGKE	73.7217	-1.03847	0.306568	-3.3874	0.000705572	0.028761
RPL23AP64	90.4639	-1.04055	0.293492	-3.54542	0.000391986	0.018767
PLCH1	93.3368	-1.04285	0.275526	-3.78495	0.00015374	0.00951926
GOLGA2P5	139.08	-1.0453	0.2514	-4.15791	3.21e-05	0.00276957
EGLN3	69.9857	-1.04873	0.304482	-3.44432	0.000572498	0.0249028
SORBS2	428.37	-1.05268	0.222328	-4.73483	2.19e-06	0.000310855
PXYLP1	159.987	-1.06295	0.272896	-3.89506	9.82e-05	0.00669703
ZNF333	316.3	-1.0659	0.211831	-5.03183	4.86e-07	8.53e-05
NOL4L	351.257	-1.07158	0.270953	-3.95485	7.66e-05	0.0054554
PCF11	1104.54	-1.07609	0.189041	-5.69236	1.25e-08	4.11e-06
LIPG	225.154	-1.08065	0.249092	-4.33837	1.44e-05	0.00140786
MAP1A	54.6608	-1.0844	0.316582	-3.42535	0.000614014	0.0261558
HVCN1	70.7062	-1.08454	0.289204	-3.7501	0.000176762	0.0105528
MBP	2643.67	-1.09048	0.165808	-6.57675	4.81e-11	3.55e-08
KDM4A	1773.49	-1.10018	0.174166	-6.31683	2.67e-10	1.57e-07
PABPC1L	681.165	-1.10127	0.309423	-3.5591	0.000372126	0.0180746
ALX3	59.8681	-1.10346	0.336185	-3.28231	0.00102959	0.0370299
ALPK1	136.293	-1.10947	0.248468	-4.46524	8e-06	0.000880131
MIR17HG	72.8614	-1.1223	0.305772	-3.67039	0.00024218	0.012952
ERBB3	221.756	-1.12487	0.252499	-4.45493	8.39e-06	0.000883929
SEMA6D	95.9022	-1.12928	0.292596	-3.85952	0.000113609	0.00741273
GREB1	36.4683	-1.13537	0.351854	-3.22684	0.00125168	0.0428241
DKFZP586I1420	54.3958	-1.14455	0.339042	-3.37584	0.000735909	0.0295687
C9orf72	261.435	-1.14878	0.251636	-4.56523	4.99e-06	0.000588584
PPFIBP2	163.421	-1.14907	0.257835	-4.4566	8.33e-06	0.000883929
LOC284454	506.664	-1.14968	0.251583	-4.56979	4.88e-06	0.000584357
FOXO1	175.356	-1.16047	0.277068	-4.18837	2.81e-05	0.0024809
FAM117A	100.577	-1.17257	0.315957	-3.71117	0.000206302	0.0117457
DNMT3B	592.481	-1.18203	0.197189	-5.99442	2.04e-09	8.36e-07
COX10-AS1	102.538	-1.19463	0.259911	-4.59631	4.3e-06	0.000524088
PFKFB4	736.888	-1.19503	0.217353	-5.49809	3.84e-08	1.03e-05
WDR52	179.232	-1.19744	0.262726	-4.55775	5.17e-06	0.00060511
ASB13	424.559	-1.20284	0.234035	-5.1396	2.75e-07	5.41e-05
ZNF345	67.2032	-1.20519	0.326847	-3.68732	0.000226628	0.0123772
ATP2A1	33.3671	-1.20951	0.362886	-3.33302	0.000859091	0.0323994
KCNMB3	49.2558	-1.21178	0.331255	-3.65815	0.000254039	0.0133788
ZMIZ1-AS1	33.7321	-1.21203	0.362197	-3.34634	0.000818859	0.0314412
PDXDC2P	216.604	-1.22861	0.267875	-4.58649	4.51e-06	0.00054482
KLHDC1	26.7069	-1.23087	0.379346	-3.24471	0.00117569	0.0411799
SLC4A8	88.9392	-1.23926	0.286186	-4.33027	1.49e-05	0.00144477
SYT2	43.1037	-1.2396	0.332421	-3.72901	0.000192235	0.0112488
GLI2	113.58	-1.24166	0.302893	-4.09934	4.14e-05	0.00337547
TMEM133	97.6847	-1.2478	0.347113	-3.59478	0.000324661	0.0161147
TMEM169	19.9254	-1.26158	0.37709	-3.34556	0.000821153	0.0314412
KANK1	217.404	-1.27857	0.226374	-5.64804	1.62e-08	5.2e-06
STARD8	284.599	-1.29184	0.244337	-5.28712	1.24e-07	2.78e-05
GABRE	96.3672	-1.39756	0.294149	-4.7512	2.02e-06	0.000299267
FAM212B	48.4812	-1.40478	0.31598	-4.44577	8.76e-06	0.000915895
AADAC	19.0021	-1.41263	0.377177	-3.74528	0.000180194	0.0106713
NEURL1B	786.273	-1.43165	0.176853	-8.09516	5.72e-16	1.05e-12
PAQR8	159.826	-1.46033	0.242841	-6.01352	1.82e-09	7.65e-07
MIR503HG	57.6307	-1.51079	0.31472	-4.80044	1.58e-06	0.000246434
HOXB7	21.6056	-1.5212	0.373779	-4.06979	4.71e-05	0.0037305
NGF	44.4093	-1.64179	0.342424	-4.79462	1.63e-06	0.000250344
SLCO4C1	114.691	-1.65465	0.30038	-5.50852	3.62e-08	9.88e-06
RCSD1	253.563	-1.79361	0.220186	-8.14587	3.77e-16	7.93e-13
LOC155060	56.5809	-1.95994	0.330261	-5.93452	2.95e-09	1.14e-06
KIAA1644	10.9281	-2.01926	0.380972	-5.30029	1.16e-07	2.66e-05
