# Supplementary material for: Flura-seq identifies organ-specific metabolic adaptations during early metastatic colonization
Source: eLife journal article supplement (doi:10.7554/elife.43627), 2019-03-25
Supplement: supp [file elife-43627-supp-v1.zip › elife_poa_e43627_Supplementary_File_2.xlsx]

## Sheet: Control
Official Gene Symbol	SBcon1	SBcon2	SBcon3	TGFBcon1	TGFBcon2	TGFBcon3	SBcon (Average)	TGFBcon (Average)	Fold Change	lfcSE	stat	pvalue	padj
A4GALT	233.033	242.784	185.54	481.889	507.77	429.328	220.452	472.996	2.14557	0.145363	7.52907	5.11024e-14	3.73073e-12
ACHE	13.0499	20.232	19.2769	39.7434	44.3952	33.5223	17.5196	39.2203	2.23866	0.287051	3.77521	0.000159876	0.00401732
ADAM19	1307.78	1309.83	1261.43	3357.49	3506.3	3747.63	1293.02	3537.14	2.73557	0.0772263	18.7754	1.20145e-78	7.97379e-76
AMIGO2	1947.22	1935.52	1907.21	5110.34	4984.29	5736.75	1929.99	5277.13	2.73428	0.090939	15.9172	4.81627e-57	1.9534e-54
AMZ1	10.2535	10.4906	7.22884	13.2478	34.2213	15.3476	9.32431	20.9389	2.24562	0.343797	3.04939	0.00229306	0.040436
ANGPTL4	133.295	136.378	121.685	1321.47	1358.68	1345.33	130.453	1341.83	10.2859	0.105805	31.7172	8.9951e-221	2.62675e-217
ANKRD34A	42.8781	47.9572	44.5778	19.8717	19.4229	22.6174	45.1377	20.6374	0.457209	0.24461	-4.40275	1.06888e-05	0.00034376
ARID3A	80.1634	80.1785	68.6739	366.799	337.589	364.706	76.3386	356.365	4.66821	0.142477	15.5532	1.51414e-54	5.66871e-52
ARID5B	288.961	286.245	263.853	139.102	147.059	131.666	279.686	139.276	0.497971	0.121536	-8.27364	1.29928e-16	1.11593e-14
ARRDC2	469.795	467.583	509.031	1062.31	1071.96	1048.48	482.136	1060.92	2.20045	0.0932641	12.1338	6.98909e-34	1.24448e-31
ATOH8	70.8421	81.6772	54.8187	192.093	208.103	191.844	69.1126	197.347	2.85544	0.185282	8.11149	5.00013e-16	4.0786e-14
AXIN2	118.381	151.365	133.733	51.3353	64.743	67.4485	134.493	61.1756	0.45486	0.154717	-7.1848	6.73059e-13	4.48737e-11
BCL3	302.943	343.943	292.165	779.137	849.058	598.555	313.017	742.25	2.37127	0.154933	7.94234	1.98397e-15	1.57435e-13
BCOR	700.963	716.361	641.559	2146.15	2115.25	2110.69	686.295	2124.03	3.09492	0.0846209	19.2268	2.20945e-82	1.5362e-79
BHLHE40	607.75	644.426	609.632	8383.38	8569.2	8024.35	620.603	8325.64	13.4154	0.0922144	40.4809	0	0
BMF	30.7604	28.4746	27.7105	173.878	181.28	164.38	28.9818	173.179	5.97545	0.202062	12.5568	3.64702e-36	7.39586e-34
BMP4	3085.36	3455.92	2959.61	1540.89	1562.16	1342.51	3166.96	1481.85	0.467909	0.0855299	-12.8067	1.504e-37	3.27759e-35
C1orf106	102.535	100.41	87.3484	240.945	270.071	260.908	96.7645	257.308	2.65912	0.127048	11.0947	1.33152e-28	1.98383e-26
C6orf201	17.7105	13.488	18.0721	4.13994	2.7747	3.23106	16.4235	3.3819	0.205918	0.424243	-4.83414	1.33725e-06	5.03226e-05
CALCR	5.59279	9.74132	11.4457	22.3557	20.3478	33.5223	8.92659	25.4086	2.84639	0.363714	3.90542	9.40605e-05	0.00247902
CDKN1A	1346.93	1458.2	1186.73	4651.64	4892.72	4268.24	1330.62	4604.2	3.46019	0.0995833	17.9203	8.18314e-72	4.59546e-69
CITED2	2901.73	3098.49	2559.61	941.423	1045.14	848.154	2853.28	944.905	0.331165	0.10778	-14.7525	2.96501e-49	9.41133e-47
CLCF1	579.786	587.476	603.005	1310.71	1379.03	1307.77	590.089	1332.5	2.25814	0.0779858	15.0035	6.96671e-51	2.31184e-48
CLDN14	6.52493	7.49332	3.61442	14.9038	17.5731	16.1553	5.87755	16.2107	2.75808	0.375618	3.66321	0.000249079	0.00603118
CLDN4	755.027	810.028	666.258	1578.15	1704.59	1590.09	743.771	1624.27	2.18384	0.0997065	11.2686	1.87582e-29	2.9137e-27
COL1A1	394.292	413.631	386.743	1323.95	1624.12	1682.98	398.222	1543.69	3.87645	0.116979	16.6377	3.71363e-62	1.74912e-59
CSF2	13.0499	20.232	15.6625	30.6356	43.4703	38.3689	16.3148	37.4916	2.29802	0.239428	4.77266	1.81809e-06	6.66982e-05
CSF3	20.5069	17.2346	19.2769	2.48397	8.3241	3.23106	19.0061	4.67971	0.246221	0.407543	-4.7512	2.02214e-06	7.36291e-05
CSRNP1	527.587	585.978	499.392	1715.59	1750.84	1684.19	537.652	1716.87	3.19328	0.0835302	20.0011	5.3851e-89	4.36822e-86
CTGF	11463.4	11948.1	10786	23156.4	23207.6	22848.1	11399.2	23070.7	2.02389	0.0827005	12.2682	1.34133e-34	2.44809e-32
CXCL8	412.935	366.423	412.646	129.994	137.81	172.458	397.335	146.754	0.369346	0.154603	-9.11554	7.82815e-20	8.79221e-18
DHRS3	11.1856	3.74666	7.83124	44.7114	40.6956	40.7922	7.58783	42.0664	5.54393	0.359578	6.60208	4.0543e-11	2.37738e-09
DUSP1	1537.09	1608.07	1335.53	4577.95	4609.7	4258.54	1493.56	4482.06	3.00093	0.0893329	17.6989	4.27943e-70	2.23157e-67
DUSP2	37.2853	38.9653	33.1322	13.2478	19.4229	17.7709	36.4609	16.8139	0.461147	0.250893	-4.24761	2.16062e-05	0.000662758
DUSP5	1152.12	1218.41	1096.37	383.359	323.715	302.104	1155.63	336.393	0.291089	0.0997676	-17.8447	3.17866e-71	1.71895e-68
DUSP6	6193.09	6468.98	6280.65	1706.48	1601	1565.05	6314.24	1624.18	0.257224	0.0621423	-31.5003	8.61362e-218	2.09613e-214
EDN1	406.41	367.922	376.502	4902.52	4765.09	4759.76	383.611	4809.12	12.5364	0.0807468	45.0931	0	0
FGL2	17.7105	11.9893	12.0481	4.13994	8.3241	5.25048	13.916	5.90484	0.424321	0.380838	-3.02093	0.00252001	0.0436991
FOXA2	1445.74	1539.13	1194.57	729.458	762.118	579.168	1393.14	690.248	0.495461	0.121689	-8.31133	9.46379e-17	8.2743e-15
FOXF2	346.753	357.431	324.093	771.685	800.039	782.321	342.759	784.682	2.28931	0.118561	10.0337	1.08424e-23	1.40098e-21
FRMD8	733.588	753.828	809.027	1718.9	1733.26	1857.46	765.481	1769.87	2.31211	0.096134	12.5308	5.06522e-36	1.01311e-33
FSTL3	631.054	712.615	560.837	1578.97	1720.31	1582.41	634.835	1627.23	2.56324	0.130271	10.3631	3.64926e-25	4.97971e-23
FURIN	1397.27	1483.68	1257.22	3568.63	3574.74	3393.02	1379.39	3512.13	2.54615	0.0742153	18.1407	1.52067e-73	8.88133e-71
GADD45B	517.333	528.279	424.694	2440.08	2595.27	2296.48	490.102	2443.94	4.9866	0.116415	19.823	1.88498e-87	1.44856e-84
GATA2	287.097	296.735	248.792	572.968	596.561	512.124	277.542	560.551	2.0197	0.133974	7.51314	5.77268e-14	4.19338e-12
GLIS2	576.99	609.956	484.934	1207.21	1296.71	1036.77	557.294	1180.23	2.11779	0.128121	8.393	4.73873e-17	4.21892e-15
GPR132	29.8282	21.7306	49.3971	183.813	209.952	266.563	33.652	220.11	6.54076	0.22856	11.4943	1.40878e-30	2.33745e-28
GRIN2D	13.982	31.4719	21.0841	38.0875	55.494	48.8698	22.1793	47.4838	2.1409	0.338589	3.07489	0.00210579	0.0377259
HAS2	333.703	346.191	413.851	134.962	113.763	142.571	364.582	130.432	0.357757	0.13287	-11.0093	3.44559e-28	5.0309e-26
HES1	419.46	447.351	346.984	1164.98	1305.03	941.855	404.598	1137.29	2.81091	0.121311	12.2108	2.72253e-34	4.90761e-32
HIC1	52.1994	59.9466	48.1922	510.869	524.418	461.234	53.4461	498.841	9.33353	0.132737	24.0839	3.6852e-128	3.8434e-125
HIVEP1	550.89	551.508	479.513	1239.5	1266.19	1246.38	527.304	1250.69	2.37186	0.105582	11.7697	5.59244e-32	9.49479e-30
HMOX1	205.069	209.064	169.878	437.178	450.426	386.112	194.67	424.572	2.18098	0.118806	9.42218	4.41833e-21	5.20258e-19
HOXB4	13.0499	13.488	25.9033	6.62391	6.4743	6.05824	17.4804	6.38548	0.365294	0.380782	-3.63135	0.000281938	0.00675956
HOXD1	52.1994	44.2106	47.5898	118.402	117.462	124.8	47.9999	120.221	2.50462	0.164443	8.02549	1.01123e-15	8.15745e-14
HTR1D	41.0138	53.9519	49.3971	125.026	132.261	103.798	48.1209	120.362	2.50123	0.17708	7.23074	4.80363e-13	3.23216e-11
ID1	1222.03	1258.88	1140.95	2650.39	2786.72	2290.02	1207.28	2575.71	2.13347	0.0964347	11.2839	1.57606e-29	2.47441e-27
ID3	502.419	510.295	389.152	1137.66	1212.54	1002.84	467.289	1117.68	2.39184	0.125942	9.93454	2.94528e-23	3.77229e-21
ID4	129.566	140.874	119.276	301.388	283.019	273.833	129.906	286.08	2.20222	0.12414	9.12577	7.12256e-20	8.06174e-18
IER3	6084.96	6959.8	5742.71	13661	13871.7	11651.6	6262.49	13061.4	2.08566	0.119589	8.81892	1.15569e-18	1.19675e-16
IER5L	573.261	629.439	573.488	1517.7	1727.71	1470.94	592.063	1572.12	2.65533	0.152174	9.17408	4.55437e-20	5.27765e-18
IL11	8522.49	8642.05	7523.41	18214.9	17776.6	15517.6	8229.31	17169.7	2.08641	0.10443	10.1184	4.57772e-24	6.02156e-22
ITPK1.AS1	23.3033	15.736	10.2409	7.4519	5.5494	5.65436	16.4267	6.21855	0.378563	0.334788	-3.73342	0.000188901	0.0046669
JAG1	3291.36	3425.95	3314.42	6569.26	6544.59	7386.62	3343.91	6833.49	2.04356	0.0752324	13.6847	1.25334e-42	3.15517e-40
JUN	5581.61	6187.23	5232.47	12531.6	12507.4	10860.4	5667.11	11966.5	2.11157	0.103413	10.3843	2.92372e-25	4.02729e-23
JUNB	751.299	890.956	734.329	14517.1	15846.3	13071.7	792.195	14478.4	18.2763	0.111669	37.3584	1.84909e-305	6.74966e-302
KCNA7	39.1496	25.4773	30.1202	144.07	184.055	155.899	31.5823	161.341	5.10859	0.196582	11.8371	2.50949e-32	4.36203e-30
KCTD11	206.001	226.298	189.155	631.755	639.106	633.288	207.151	634.717	3.06402	0.0961715	16.7692	4.09894e-63	1.99495e-60
KDM6B	532.248	541.767	506.621	1375.29	1618.58	1228.21	526.879	1407.36	2.67112	0.105179	13.395	6.46342e-41	1.54709e-38
KDM7A	27.964	30.7226	27.7105	95.2187	80.4663	105.01	28.799	93.5648	3.24889	0.212303	7.92482	2.28481e-15	1.80327e-13
KLF13	656.221	727.601	624.692	1424.97	1355.9	1263.75	669.505	1348.21	2.01374	0.0937298	10.7292	7.42414e-27	1.05243e-24
KLF4	616.139	651.919	535.536	1249.43	1424.35	1318.27	601.198	1330.68	2.21339	0.0930978	12.2903	1.02161e-34	1.91768e-32
KLF7	120.245	136.378	119.878	427.242	435.628	438.213	125.501	433.694	3.45572	0.108457	16.4089	1.65153e-60	7.5356e-58
KLHL26	316.925	361.178	290.961	869.388	865.707	716.488	323.021	817.194	2.52985	0.116619	11.4056	3.92039e-30	6.43164e-28
LBH	93.2132	110.901	80.722	453.738	399.557	424.077	94.9455	425.791	4.48458	0.13305	16.2176	3.78436e-59	1.62516e-56
LFNG	300.147	336.45	311.442	1867.11	1936.74	1929.75	316.013	1911.2	6.04786	0.0837584	30.8999	1.19652e-209	2.49577e-206
LHB	9.32132	8.99198	10.2409	30.6356	59.1936	47.2543	9.51805	45.6945	4.80082	0.30568	6.99989	2.5616e-12	1.61913e-10
LINC01137	32.6246	32.2213	22.8913	96.0467	83.241	65.429	29.2457	81.5722	2.7892	0.224519	6.44491	1.15669e-10	6.61021e-09
LOC100272216	13.982	16.4853	15.6625	8.27988	7.3992	6.46213	15.3766	7.3804	0.479977	0.321838	-3.18681	0.00143851	0.0274898
LOC100996437	38.2174	26.2266	34.337	17.3878	10.1739	15.3476	32.927	14.3031	0.434387	0.34427	-3.25811	0.00112155	0.0221593
LOC101059948	5.59279	8.24265	10.2409	48.0233	50.8695	62.6019	8.02543	53.8316	6.70762	0.30121	8.59486	8.33688e-18	8.00834e-16
LOC101928158	15.8462	12.7386	7.22884	2.48397	2.7747	1.21165	11.9379	2.15677	0.180666	0.478573	-4.47231	7.7379e-06	0.000256775
LOC101929690	6.52493	1.49866	4.81922	9.10787	19.4229	16.5592	4.28094	15.03	3.51091	0.437341	3.77883	0.000157566	0.00397707
LOC146880	384.039	346.941	495.175	768.373	913.801	1227	408.718	969.724	2.3726	0.150901	8.19352	2.53706e-16	2.12894e-14
LOC344887	48.4709	40.4639	73.4932	15.7318	23.1225	33.9262	54.1427	24.2602	0.448078	0.258657	-4.15962	3.18782e-05	0.000944126
LOC730668	11.1856	4.49599	12.6505	26.4956	30.5217	35.9456	9.44401	30.9876	3.28119	0.361285	4.48182	7.40105e-06	0.00024785
LRRC75B	27.964	35.2186	32.5298	69.551	83.241	67.8523	31.9041	73.5481	2.30529	0.260484	4.473	7.71305e-06	0.000256534
LTBP3	345.821	353.685	377.104	734.426	921.201	922.065	358.87	859.23	2.39427	0.1044	12.0131	3.03367e-33	5.33669e-31
MAFK	907.897	939.662	874.689	1906.03	2068.08	2073.13	907.416	2015.75	2.22141	0.0740106	15.5431	1.77302e-54	6.47195e-52
METRNL	83.8919	89.1705	72.2884	233.493	243.249	197.903	81.7836	224.881	2.74971	0.16922	8.52901	1.4761e-17	1.38157e-15
MEX3B	46.6066	56.9492	49.9995	100.187	121.162	107.837	51.1851	109.728	2.14376	0.163025	6.61108	3.81515e-11	2.25526e-09
MINOS1P1	13.982	8.24265	11.4457	5.79592	3.6996	4.03883	11.2234	4.51145	0.401967	0.388319	-3.04151	0.00235396	0.0412608
MIR181A2HG	4.66066	6.74399	5.42163	14.9038	18.498	15.3476	5.60876	16.2498	2.89722	0.332893	4.04738	5.17938e-05	0.00145992
MISP	71.7742	83.1759	74.0956	209.481	221.051	196.287	76.3485	208.94	2.73666	0.163976	8.73803	2.37206e-18	2.40517e-16
NEDD9	116.517	119.144	113.854	906.647	990.568	941.451	116.505	946.222	8.12174	0.103545	29.0704	8.49887e-186	1.3788e-182
NET1	2429.14	2519.25	2412.02	6011.2	5582.7	5979.49	2453.47	5857.79	2.38755	0.0852746	14.686	7.92015e-49	2.46047e-46
NFATC2	604.022	576.986	512.645	1179.06	1215.32	1154.7	564.551	1183.03	2.09552	0.0753925	14.173	1.3462e-45	3.77998e-43
NGF	82.0276	82.4265	87.3484	182.985	191.454	164.38	83.9342	179.607	2.13985	0.160903	6.70405	2.02719e-11	1.22818e-09
NKX3.1	502.419	484.818	436.742	1216.31	1183.87	1149.85	474.66	1183.35	2.49304	0.115867	11.3298	9.33885e-30	1.48214e-27
NOL4L	137.023	156.61	150.601	759.265	800.039	787.572	148.078	782.292	5.28296	0.0972113	24.5566	3.67452e-133	4.47097e-130
NR4A2	170.58	228.546	153.01	95.2187	73.0671	54.5242	184.046	74.27	0.403541	0.196566	-6.677	2.43879e-11	1.47143e-09
NRARP	77.367	75.6825	65.0595	154.834	167.407	148.225	72.703	156.822	2.15702	0.148313	7.42285	1.14623e-13	8.24436e-12
NTF4	0.932132	3.74666	4.21682	97.7026	120.237	130.858	2.9652	116.266	39.2101	0.36569	13.1199	2.53144e-39	5.60023e-37
NUAK1	2165.34	2230.01	2021.06	6127.11	5942.48	5790.07	2138.81	5953.22	2.78343	0.0717812	20.5393	9.59434e-94	8.24041e-91
OLFM2	11.1856	14.2373	9.03605	34.7755	36.0711	27.0602	11.4863	32.6356	2.84126	0.346081	4.1195	3.79693e-05	0.00109998
OR7E14P	9.32132	8.99198	9.63845	19.8717	23.1225	23.0213	9.31725	22.0052	2.36177	0.34643	3.39306	0.000691157	0.014797
OSR1	239.558	254.024	231.925	87.7668	65.6679	68.2562	241.836	73.897	0.305567	0.138754	-12.2921	9.98828e-35	1.91768e-32
PCDH1	40.0817	42.7119	37.9514	130.822	129.486	122.78	40.2483	127.696	3.17271	0.215501	7.61438	2.64965e-14	1.96383e-12
PDE4B	197.612	209.064	187.95	35.6035	37.9209	29.4835	198.208	34.336	0.173232	0.161414	-15.6798	2.0791e-55	8.20458e-53
PDGFA	236.762	260.768	266.865	667.359	656.679	735.471	254.798	686.503	2.6943	0.10356	13.7416	5.72079e-43	1.46543e-40
PDGFB	7.45706	6.74399	8.43364	365.143	364.411	304.124	7.5449	344.559	45.6678	0.269123	19.7866	3.88725e-87	2.83789e-84
PFKFB3	1612.59	1783.41	1589.74	3938.74	3854.98	3964.11	1661.91	3919.28	2.35829	0.0708844	17.4332	4.61818e-68	2.32517e-65
PHLDB1	1332.02	1353.29	1377.7	2724.91	2894.94	3277.51	1354.34	2965.79	2.18985	0.0786778	14.3573	9.58755e-47	2.91641e-44
PIK3IP1	15.8462	17.2346	15.6625	83.6268	65.6679	79.9688	16.2478	76.4212	4.70348	0.242149	9.02803	1.74797e-19	1.90464e-17
PIM1	618.936	645.924	542.765	1313.19	1442.84	1307.77	602.542	1354.6	2.24815	0.0938327	12.4222	1.98141e-35	3.90954e-33
PITX3	4.66066	8.99198	6.62643	14.9038	24.9723	14.5398	6.75969	18.1386	2.68335	0.414401	3.05141	0.00227771	0.0403113
PLAU	5753.12	5745.13	5258.38	14540.3	15022.2	14660.5	5585.54	14741	2.63914	0.0759112	18.4075	1.14453e-75	6.96302e-73
PLEKHF1	82.0276	116.146	83.734	46.3673	33.2964	36.7533	93.9694	38.8057	0.412961	0.251282	-4.9752	6.51805e-07	2.56523e-05
PMEPA1	3393.89	3584.06	3155.39	11893.2	11861.8	10600.3	3377.78	11451.8	3.39033	0.11245	15.5911	8.37233e-55	3.21696e-52
PPP1R13L	1741.22	2008.21	1681.31	3635.7	3936.38	3594.15	1810.25	3722.08	2.05612	0.0933521	11.1005	1.24739e-28	1.87765e-26
PPP1R3C	18.6426	26.976	19.2769	10.7638	3.6996	7.67378	21.6318	7.37908	0.341121	0.389427	-3.62607	0.000287766	0.00688798
PRDM1	65.2493	65.9412	69.2764	236.805	236.774	243.138	66.8223	238.906	3.57524	0.129899	14.0084	1.38464e-44	3.81455e-42
PROSER2	1057.04	1005.6	869.87	2272.83	2258.61	1966.1	977.504	2165.85	2.21569	0.111071	10.2907	7.75841e-25	1.03927e-22
PTHLH	22.3712	19.4826	10.8433	65.4111	73.992	68.6601	17.5657	69.3544	3.94829	0.264765	7.39626	1.40076e-13	9.92839e-12
PXDC1	785.788	837.004	764.449	1805.84	1808.18	1714.89	795.747	1776.3	2.23225	0.0776228	14.8827	4.26693e-50	1.38448e-47
QRFP	23.3033	16.4853	18.6745	49.6793	50.8695	59.3708	19.4877	53.3065	2.73539	0.269305	5.2775	1.30957e-07	5.59096e-06
RARA	963.825	992.116	880.111	2849.11	3023.5	2804.56	945.35	2892.39	3.0596	0.0870583	18.4866	2.64862e-76	1.68141e-73
RARA.AS1	32.6246	17.2346	26.5057	77.8309	76.7667	72.6989	25.455	75.7655	2.97645	0.205294	7.55001	4.35221e-14	3.1933e-12
RASD1	367.26	417.378	318.671	147.382	161.858	134.089	367.77	147.776	0.401817	0.145638	-9.01422	1.9828e-19	2.14451e-17
RHOB	384.039	430.117	357.225	2777.9	2869.04	2556.58	390.46	2734.51	7.0033	0.115475	24.1955	2.48003e-129	2.78545e-126
RHOF	68.0457	89.1705	69.8788	181.329	200.703	126.415	75.6983	169.483	2.23892	0.207047	5.45242	4.96877e-08	2.23917e-06
RIPK4	371.921	427.119	398.188	799.837	835.185	810.189	399.076	815.07	2.04239	0.0777342	13.1753	1.21668e-39	2.77574e-37
RND1	10.2535	10.4906	5.42163	53.8192	51.7944	50.4854	8.72191	52.033	5.96578	0.314832	7.96335	1.67439e-15	1.33594e-13
RRAD	63.385	78.6799	80.722	245.913	206.253	176.901	74.2623	209.689	2.82362	0.180221	8.11894	4.70292e-16	3.85771e-14
SAMD11	8.38919	8.24265	8.43364	44.7114	58.2687	59.7747	8.35516	54.2516	6.49318	0.323527	7.99943	1.24993e-15	1.00276e-13
SEMA7A	1440.14	1470.19	1270.47	2826.75	2858.87	2752.06	1393.6	2812.56	2.0182	0.0815915	12.3967	2.72355e-35	5.30221e-33
SERPINE1	8626.88	8885.58	7411.97	38353.2	38363.9	34401.9	8308.14	37039.7	4.45824	0.100795	21.315	8.24906e-101	7.52778e-98
SGK1	567.669	587.476	564.452	1251.92	1161.67	1275.87	573.199	1229.82	2.14554	0.0871488	12.618	1.68076e-36	3.45646e-34
SIK1	598.429	665.407	662.041	4048.86	4080.66	4526.72	641.959	4218.75	6.57168	0.10084	26.8196	1.90691e-158	2.53117e-155
SKIL	485.641	439.858	472.886	4098.54	4025.17	5294.1	466.128	4472.6	9.59521	0.107572	30.2084	1.83829e-200	3.35511e-197
SLC19A2	330.907	292.989	353.611	768.373	774.141	1000.01	325.835	847.51	2.60104	0.116315	11.8272	2.82273e-32	4.84879e-30
SLFNL1	34.4889	41.2133	36.7466	61.2711	95.2647	122.78	37.4829	93.1054	2.48394	0.269698	4.78083	1.74571e-06	6.45293e-05
SMAD6	159.395	161.856	146.986	508.385	501.296	432.155	156.079	480.612	3.07929	0.112514	14.3224	1.58477e-46	4.7223e-44
SMAD7	264.726	275.754	254.816	2836.69	2834.82	2514.17	265.099	2728.56	10.2926	0.0889182	37.6989	0	0
SMOX	340.228	360.429	313.852	991.93	1059.94	949.529	338.17	1000.46	2.95847	0.109581	14.2163	7.26332e-46	2.07945e-43
SNAI1	27.0318	27.7253	21.6865	397.434	424.529	336.031	25.4812	385.998	15.1483	0.181145	21.353	3.65737e-101	3.56009e-98
SNAI2	536.908	511.044	483.73	1011.8	1068.26	999.61	510.561	1026.56	2.01065	0.0902555	11.1402	7.98956e-29	1.21516e-26
SOCS1	102.535	86.9225	71.0836	19.8717	30.5217	23.4252	86.8469	24.6062	0.283329	0.217317	-8.19884	2.42708e-16	2.04843e-14
SPACA6P	117.449	124.389	109.637	226.041	291.344	300.085	117.158	272.49	2.32582	0.1369	8.886	6.3349e-19	6.65438e-17
SPHK1	791.38	746.335	691.559	1550.82	1633.37	1678.54	743.091	1620.91	2.18131	0.126288	8.87061	7.27441e-19	7.58669e-17
SPRY1	684.185	669.153	709.631	97.7026	94.3398	94.1047	687.656	95.3824	0.138706	0.0987792	-28.7387	1.25409e-181	1.83109e-178
SPSB1	466.998	478.074	442.164	1244.47	1290.24	1141.78	462.412	1225.49	2.65022	0.091926	15.234	2.10326e-52	7.31183e-50
SYNPO	418.527	468.333	344.575	931.487	942.473	831.595	410.478	901.852	2.19708	0.134694	8.37654	5.45067e-17	4.82335e-15
SYT15	397.088	379.162	439.152	936.455	1068.26	1191.86	405.134	1065.52	2.63005	0.108885	12.7607	2.71601e-37	5.83182e-35
TBC1D2B	704.692	740.34	773.486	1443.18	1465.97	1597.36	739.506	1502.17	2.03131	0.0738997	13.8102	2.21193e-43	5.7672e-41
TFEB	45.6745	39.7146	31.325	197.889	174.806	172.054	38.9047	181.583	4.66739	0.194207	11.4037	4.00899e-30	6.50392e-28
THBS1	40124.6	40890.3	43842.9	76677.5	73935.6	101444	41619.3	84019.2	2.01876	0.116778	8.63473	5.88639e-18	5.72981e-16
TINAGL1	1751.48	1895.81	1742.15	3850.15	4330.38	4577.61	1796.48	4252.71	2.36725	0.0808918	15.3406	4.09535e-53	1.45845e-50
TMEM88	2.7964	5.24532	2.40961	12.4198	15.7233	10.9048	3.48378	13.016	3.73617	0.446952	3.64355	0.000268903	0.00646829
TREH	1.86426	1.49866	0.602403	16.5598	17.5731	14.9437	1.32178	16.3588	12.3764	0.496689	5.902	3.59127e-09	1.83987e-07
TRIM17	14.9141	14.9866	15.0601	3.31195	9.249	3.23106	14.9869	5.26401	0.351239	0.405824	-3.61362	0.000301953	0.00718047
TRIM47	437.17	466.834	424.694	1047.41	1001.67	833.614	442.899	960.896	2.16956	0.128288	8.63756	5.74252e-18	5.62728e-16
TUFT1	637.578	688.636	643.366	1468.85	1451.17	1701.16	656.527	1540.39	2.34627	0.0817717	15.0478	3.56693e-51	1.21118e-48
TXNIP	2951.13	2940.38	2705.99	1303.25	1346.65	1431.77	2865.83	1360.56	0.474751	0.0943879	-11.3306	9.26159e-30	1.48214e-27
UCN2	255.404	245.032	264.455	534.052	637.256	680.543	254.964	617.284	2.42107	0.127857	9.9307	3.06096e-23	3.88635e-21
UNC5B	12.1177	11.24	12.0481	27.3236	29.5968	30.6951	11.8019	29.2052	2.47461	0.342553	3.66176	0.000250492	0.00605536
USP2	5.59279	4.49599	6.62643	15.7318	13.8735	15.7514	5.57174	15.1189	2.7135	0.430989	2.99963	0.00270311	0.0463785
VASN	192.951	241.285	216.865	710.414	807.438	618.749	217.034	712.2	3.28152	0.124024	13.6784	1.36579e-42	3.37998e-40
VDR	568.601	636.183	545.777	1200.58	1232.89	1190.65	583.52	1208.04	2.07026	0.0824317	12.7051	5.5414e-37	1.15586e-34
VGLL3	306.672	294.487	284.937	814.741	837.035	981.032	295.365	877.602	2.97124	0.112154	13.9868	1.87618e-44	5.07297e-42
WNT4	21.439	18.7333	11.4457	12.4198	10.1739	3.63495	17.206	8.74289	0.50813	0.326307	-3.13726	0.00170537	0.0317603
WNT5B	545.297	553.007	470.477	1114.47	1114.5	1008.5	522.927	1079.16	2.06369	0.115502	9.01128	2.03672e-19	2.18663e-17
WNT7B	1197.79	1227.41	949.99	2487.28	2481.51	2145.43	1125.06	2371.4	2.1078	0.112537	9.52003	1.73129e-21	2.08914e-19
WNT9A	84.824	92.1678	77.1076	413.994	492.972	412.365	84.6998	439.777	5.19218	0.145097	16.2668	1.69768e-59	7.51145e-57
YPEL2	32.6246	28.4746	29.5177	61.2711	60.1185	66.6407	30.2057	62.6768	2.075	0.218961	4.77818	1.76892e-06	6.50579e-05
ZC3H12A	115.584	126.637	146.384	392.466	476.324	471.735	129.535	446.842	3.44958	0.109432	16.1325	1.5079e-58	6.29055e-56

## Sheet: IP
Official Gene Symbol	SBIP1	SBIP2	SBIP3	TGFBIP1	TGFBIP2	TGFBIP3	SB(Average)	TGFB (Average)	Fold Change	lfcSE	stat	pvalue	padj
A1BG	24.5627	34.0143	43.2147	18.7049	10.8518	11.3554	33.9305	13.6374	0.401921	0.369922	-3.26502	0.00109455	0.00609744
A4GALT	61.9915	90.7047	64.822	324.664	312.291	240.356	72.5061	292.437	4.03328	0.181528	10.9599	5.95829e-28	4.5077e-26
ABCA1	977.829	986.413	929.115	1746.24	1917.16	2225.66	964.452	1963.02	2.03537	0.0976584	10.4271	1.86524e-25	1.25374e-23
ABCA7	57.3129	57.9502	75.6257	28.0574	27.7324	30.2811	63.6296	28.6903	0.450896	0.236483	-4.64341	3.42705e-06	3.91815e-05
ABCD1	73.6881	104.562	101.863	490.336	447.336	387.976	93.3712	441.883	4.73254	0.141184	15.875	9.44615e-57	1.8246e-54
ABHD6	105.269	120.94	140.448	305.959	223.065	225.216	122.219	251.413	2.05708	0.166083	6.27724	3.44635e-10	8.20241e-09
ABL1	4563.98	4686.41	4001.99	9714.54	10004.2	10954.2	4417.46	10224.3	2.31452	0.0744442	16.2125	4.11325e-59	8.29431e-57
ACAP1	92.4025	93.2242	74.0823	165.672	195.333	191.149	86.5697	184.051	2.12605	0.187288	5.6929	1.24903e-08	2.34593e-07
ACHE	21.0537	30.2349	37.0411	72.1476	62.6995	51.0993	29.4433	61.9821	2.10514	0.29706	3.6112	0.000304787	0.00205167
ACOX3	63.1612	91.9645	77.169	180.369	241.152	236.571	77.4316	219.364	2.833	0.171834	8.63425	5.91143e-18	2.69168e-16
ACTA2	54.9736	54.1708	72.5389	22.7131	21.7037	28.3885	60.5611	24.2684	0.400726	0.284436	-4.52749	5.96885e-06	6.46566e-05
ADAM19	1126.37	1172.86	1092.71	4087.03	4118.87	4809.01	1130.65	4338.3	3.837	0.0803541	24.0542	7.53922e-128	5.53379e-125
ADAMTS7	11.6965	15.1174	16.9772	25.3853	36.1728	41.6365	14.5971	34.3982	2.35652	0.334286	3.47733	0.000506426	0.00317381
ADC	153.224	195.267	129.644	80.164	73.5513	52.9919	159.378	68.9024	0.432319	0.190767	-6.14706	7.89323e-10	1.78595e-08
ADIRF	77.197	94.484	38.5845	44.0902	38.5843	17.0331	70.0885	33.2359	0.474198	0.31354	-3.19261	0.00140992	0.00748827
ADRA1B	59.6522	51.6513	49.3882	189.721	191.716	174.116	53.5639	185.184	3.45726	0.190601	9.24539	2.34376e-20	1.21492e-18
AFAP1L2	350.896	418.249	390.475	943.263	952.549	967.102	386.54	954.305	2.46884	0.0954927	13.6182	3.12276e-42	3.60394e-40
AGBL2	73.6881	79.3666	66.3654	41.4181	28.9382	28.3885	73.14	32.9149	0.450026	0.299946	-3.74974	0.00017702	0.00128901
AHNAK2	246.797	294.79	362.695	1190.44	1203.35	1303.98	301.427	1232.59	4.08917	0.138828	14.5673	4.53758e-48	6.45462e-46
AMIGO2	1182.52	1302.62	1588.14	6148.58	6261.5	6156.52	1357.76	6188.87	4.55815	0.0934736	23.3698	8.66067e-121	4.96635e-118
AMN	24.5627	40.3132	23.1507	5.34427	16.8806	9.46284	29.3422	10.5626	0.359979	0.443258	-2.99814	0.00271633	0.0129433
ANGPTL2	54.9736	61.7296	40.1279	137.615	137.456	134.372	52.277	136.481	2.61073	0.189643	7.08915	1.34939e-12	4.09278e-11
ANGPTL4	52.6343	55.4306	43.2147	276.566	289.382	344.447	50.4265	303.465	6.01796	0.164622	15.3624	2.92527e-53	4.97025e-51
ANKRD20A5P	156.733	107.082	98.7764	66.8033	33.7612	47.3142	120.864	49.2929	0.407838	0.258551	-4.91912	8.69333e-07	1.12103e-05
ANKRD61	148.546	99.5232	134.274	44.0902	66.3167	68.1324	127.448	59.5131	0.466961	0.245977	-4.4294	9.44936e-06	9.75778e-05
ANXA8L1	10.5269	10.0783	6.17352	20.041	30.144	32.1737	8.92623	27.4529	3.07553	0.41832	3.4808	0.000499925	0.00313628
AP4M1	161.412	151.174	185.206	317.984	379.814	350.125	165.931	349.308	2.10514	0.129497	8.30192	1.02444e-16	4.2627e-15
AP5B1	691.264	857.915	847.316	1981.39	1902.69	1746.84	798.832	1876.97	2.34965	0.0898273	13.7321	6.52447e-43	7.77429e-41
APBA1	10.5269	20.1566	10.8037	8.0164	3.61728	1.89257	13.829	4.50875	0.326035	0.492675	-2.61581	0.00890165	0.0341298
APCDD1L.AS1	15.2055	25.1957	13.8904	42.7541	25.3209	54.8845	18.0972	40.9865	2.2648	0.328066	3.2653	0.00109349	0.00609523
APOBEC3G	51.4647	50.3915	61.7352	37.4099	15.6749	22.7108	54.5305	25.2652	0.463322	0.286178	-3.70053	0.000215154	0.00151907
AQP3	8.18756	30.2349	7.7169	49.4345	48.2303	30.2811	15.3798	42.6486	2.77303	0.338222	4.10447	4.05248e-05	0.000357343
ARHGEF40	262.002	298.57	271.635	593.213	692.105	690.787	277.402	658.702	2.37454	0.104329	11.8839	1.43429e-32	1.25929e-30
ARID3A	80.706	50.3915	69.4521	446.246	384.637	367.158	66.8499	399.347	5.97379	0.166668	15.3147	6.1033e-53	1.00897e-50
ARID5A	61.9915	102.043	101.863	225.795	245.975	177.901	88.6325	216.557	2.44332	0.192575	6.70029	2.0801e-11	5.56412e-10
ARRDC2	590.674	526.591	444.494	1372.14	1471.03	1572.72	520.586	1471.96	2.82751	0.0978628	15.1856	4.40645e-52	6.97055e-50
ARVCF	25.7323	17.637	20.064	14.6967	6.02879	7.57027	21.1444	9.43193	0.446072	0.413873	-2.53191	0.0113444	0.0415425
ASIP	44.4468	31.4947	46.3014	10.6885	19.2921	9.46284	40.7476	13.1478	0.322665	0.389022	-3.83488	0.000125627	0.000957331
ASPHD2	25.7323	30.2349	29.3242	68.1394	51.8476	60.5622	28.4305	60.1831	2.11685	0.272935	3.85073	0.000117765	0.000904939
ASPN	81.8756	61.7296	37.0411	30.7295	32.5555	18.9257	60.2154	27.4036	0.455092	0.343144	-3.15717	0.0015931	0.00826971
ATOH8	17.5448	32.7545	38.5845	129.598	104.901	113.554	29.6279	116.018	3.91583	0.24727	7.86624	3.65451e-15	1.37418e-13
ATP13A2	294.752	382.975	291.699	935.247	848.854	976.565	323.142	920.222	2.84773	0.116566	12.8325	1.07828e-37	1.09925e-35
B3GALT5	169.6	177.63	191.379	77.4919	92.8434	94.6284	179.536	88.3212	0.491941	0.183425	-5.54038	3.01812e-08	5.2947e-07
B3GNT7	169.6	195.267	157.425	374.099	400.312	435.291	174.097	403.234	2.31614	0.13298	8.99168	2.43488e-19	1.20108e-17
BAG3	2341.64	2916.41	2687.03	8159.36	7719.27	7030.89	2648.36	7636.5	2.88349	0.107095	14.2109	7.84284e-46	1.00641e-43
BAI2	9.35721	17.637	13.8904	32.0656	31.3497	45.4216	13.6282	36.279	2.66205	0.319476	4.06953	4.71088e-05	0.000408143
BAMBI	177.787	201.566	280.895	589.205	553.443	546.952	220.083	563.2	2.55904	0.14873	9.12517	7.16247e-20	3.64076e-18
BCL11A	86.5542	131.018	123.47	228.467	258.032	227.108	113.681	237.869	2.09243	0.170602	6.25523	3.96928e-10	9.34997e-09
BCL3	532.192	859.175	722.302	2502.45	2424.78	2140.49	704.556	2355.91	3.34382	0.153068	11.2923	1.43207e-29	1.15256e-27
BCL9L	4916.05	6388.38	6014.56	13972.6	13978.4	12761.6	5772.99	13570.8	2.35075	0.115285	10.6463	1.81454e-26	1.29058e-24
BCOR	953.266	1039.32	1228.53	4677.57	4741.04	4483.49	1073.71	4634.03	4.31592	0.0850775	24.7844	1.32181e-135	1.15501e-132
BHLHE40	2453.93	3174.66	3193.26	47791.1	46869	44751.7	2940.62	46470.6	15.803	0.0891331	44.5595	0	0
BIN1	178.957	163.772	141.991	324.664	352.082	412.58	161.573	363.108	2.24733	0.138262	8.25842	1.4761e-16	6.11431e-15
BLOC1S2	656.175	699.182	700.695	2835.13	2973.4	2819.93	685.35	2876.15	4.19662	0.0723938	28.5636	1.90353e-179	2.49498e-176
BLVRB	51.4647	62.9894	44.758	20.041	20.4979	35.9588	53.0707	25.4992	0.480477	0.268769	-3.97003	7.18642e-05	0.00059188
BMF	36.2592	32.7545	52.475	309.967	430.456	459.894	40.4962	400.106	9.88008	0.212247	15.4107	1.38605e-53	2.37701e-51
BMP1	90.0632	112.121	112.667	404.828	385.843	480.712	104.95	423.794	4.03805	0.142706	13.9684	2.43056e-44	2.99334e-42
BMPR2	1183.69	1160.26	1284.09	3234.62	3485.85	3435.01	1209.35	3385.16	2.79916	0.0715702	20.7329	1.74836e-95	6.29068e-93
BPGM	52.6343	90.7047	115.754	163	225.477	172.224	86.3642	186.9	2.16409	0.208121	5.38484	7.25074e-08	1.17849e-06
BRI3	853.846	1065.78	1095.8	2378.2	2152.28	1801.72	1005.14	2110.73	2.09994	0.135081	7.89056	3.0084e-15	1.13823e-13
C10orf55	46.7861	62.9894	46.3014	223.123	166.395	143.835	52.0256	177.784	3.41725	0.228952	7.62634	2.4151e-14	8.67262e-13
C15orf39	3137.01	4396.66	4256.64	11328.5	10973.6	9650.2	3930.1	10650.8	2.71005	0.130708	10.9396	7.4553e-28	5.60675e-26
C15orf48	45.6164	42.8328	43.2147	237.82	229.094	240.356	43.8879	235.757	5.37179	0.199479	11.9748	4.81361e-33	4.30876e-31
C15orf57	105.269	107.082	125.014	256.525	235.123	278.207	112.455	256.618	2.28197	0.153062	7.70697	1.28843e-14	4.73802e-13
C17orf78	91.2328	75.5872	54.0183	30.7295	39.79	34.0662	73.6128	34.8619	0.473585	0.324533	-3.25952	0.00111599	0.0061893
C19orf71	133.34	167.552	63.2786	267.213	301.44	291.455	121.39	286.703	2.36183	0.19273	6.24495	4.23925e-10	9.96033e-09
C1orf106	237.439	296.05	280.895	944.599	983.899	840.3	271.462	922.933	3.39987	0.115965	15.2198	2.61221e-52	4.20475e-50
C1orf110	28.0716	28.9751	20.064	10.6885	7.23455	3.78514	25.7036	7.23607	0.28152	0.43306	-3.71079	0.000206609	0.00146835
C1orf198	759.104	902.008	966.156	2022.8	2024.47	1890.68	875.756	1979.32	2.26012	0.0971073	12.1145	8.84958e-34	7.96029e-32
C1QL3	136.849	131.018	125.014	62.7951	44.6131	49.2068	130.96	52.205	0.398632	0.239156	-5.47303	4.42397e-08	7.51665e-07
C22orf24	69.0095	60.4698	43.2147	20.041	28.9382	22.7108	57.5646	23.8967	0.415128	0.33527	-3.67425	0.000238546	0.00165933
C2orf66	94.7418	70.5481	52.475	36.0738	24.1152	43.5291	72.5883	34.5727	0.476285	0.384771	-2.74071	0.00613067	0.0251898
C6orf201	47.9557	55.4306	69.4521	18.7049	16.8806	11.3554	57.6128	15.647	0.271589	0.360343	-4.93407	8.05324e-07	1.04955e-05
C9orf16	53.804	71.8079	57.1051	25.3853	26.5267	32.1737	60.9056	28.0285	0.460196	0.265212	-4.09129	4.28983e-05	0.000376283
CALCR	10.5269	7.55872	10.8037	56.1148	43.4073	58.6696	9.62975	52.7306	5.4758	0.40028	5.75435	8.69735e-09	1.69964e-07
CAMK1	180.126	181.409	132.731	52.1066	88.0204	79.4878	164.755	73.2049	0.444325	0.175533	-6.62994	3.35826e-11	8.85402e-10
CARD10	948.588	1078.38	922.942	2559.9	2476.63	2647.7	983.302	2561.41	2.60491	0.0723969	19.0009	1.67755e-80	4.73587e-78
CASC10	83.0453	90.7047	103.407	327.336	283.353	278.207	92.3855	296.299	3.2072	0.16501	10.1664	2.80095e-24	1.81616e-22
CASP3	719.336	738.235	831.882	1627.33	1606.07	1504.59	763.151	1579.33	2.06949	0.0753788	13.9758	2.19022e-44	2.71558e-42
CCDC183	19.8841	22.6762	46.3014	12.0246	10.8518	13.248	29.6206	12.0415	0.406524	0.420376	-2.80479	0.00503496	0.0214864
CD151	387.155	553.047	549.444	1819.72	1788.14	1837.68	496.548	1815.18	3.6556	0.106577	17.5069	1.26881e-68	2.91033e-66
CD3EAP	663.193	748.314	716.129	1746.24	1809.84	1604.9	709.212	1720.33	2.42569	0.0985639	12.9533	2.25138e-38	2.33406e-36
CD40	139.189	122.199	120.384	280.574	219.448	302.811	127.257	267.611	2.10291	0.147634	7.08379	1.40261e-12	4.23319e-11
CDC42EP1	1301.82	1729.69	1666.85	3568.63	3191.64	2956.19	1566.12	3238.82	2.06805	0.128953	8.08865	6.03303e-16	2.39106e-14
CDC42SE1	2091.34	2489.34	2645.35	6855.36	6841.47	6557.75	2408.68	6751.53	2.803	0.102195	14.5065	1.10124e-47	1.54258e-45
CDK15	25.7323	21.4164	32.411	8.0164	12.0576	7.57027	26.5199	9.21475	0.347465	0.404887	-3.35603	0.000790701	0.00462457
CDKN1A	863.203	1101.05	1088.08	5769.13	5454.85	5302.97	1017.45	5508.99	5.41452	0.102418	23.7208	2.19915e-124	1.39153e-121
CELSR2	90.0632	95.7438	109.58	260.533	282.148	300.918	98.4624	281.2	2.85591	0.145979	10.2966	7.29804e-25	4.7658e-23
CENPM	480.727	411.95	268.548	173.689	167.6	204.397	387.075	181.895	0.469923	0.187684	-5.78594	7.21086e-09	1.42893e-07
CFH	163.751	113.381	121.927	48.0984	48.2303	54.8845	133.02	50.4044	0.378924	0.200377	-6.92886	4.24233e-12	1.224e-10
CFP	38.5985	55.4306	27.7809	10.6885	14.4691	22.7108	40.6033	15.9561	0.392976	0.331448	-4.0234	5.73648e-05	0.000485313
CHST15	684.246	833.979	785.581	2257.95	1953.33	1708.99	767.935	1973.42	2.56978	0.10615	12.8054	1.53022e-37	1.52664e-35
CHST3	2159.18	2567.45	2887.67	6545.39	6398.96	5778.01	2538.1	6240.79	2.45885	0.103343	12.5268	5.3264e-36	5.11724e-34
CISH	52.6343	55.4306	37.0411	108.221	126.605	71.9176	48.3687	102.248	2.11393	0.265386	4.00482	6.20636e-05	0.000519556
CITED2	7175.81	8412.86	9266.46	3488.47	3468.97	3143.55	8285.04	3367	0.406395	0.106443	-12.1442	6.16026e-34	5.59608e-32
CLCF1	1449.2	1752.36	1679.2	4392.99	4491.45	4252.6	1626.92	4379.01	2.6916	0.0750278	19.0265	1.02802e-80	2.94754e-78
CLDN11	92.4025	90.7047	60.1919	515.722	674.019	745.672	81.0997	645.137	7.95487	0.205446	14.348	1.0959e-46	1.43641e-44
CLDN14	23.393	17.637	21.6073	68.1394	81.9916	79.4878	20.8791	76.5396	3.66584	0.312632	5.83199	5.47701e-09	1.10201e-07
CLDN4	804.72	981.374	905.965	4805.83	4440.81	3936.54	897.353	4394.39	4.89706	0.100894	22.6498	1.40029e-113	6.58853e-111
CLIC3	7.01791	7.55872	9.26029	24.0492	22.9094	24.6034	7.94564	23.854	3.00215	0.405462	3.54414	0.000393903	0.00256226
CLTCL1	188.314	163.772	148.165	358.066	335.201	397.439	166.75	363.569	2.18032	0.141667	7.77763	7.38985e-15	2.74502e-13
CMTM3	265.511	350.221	308.676	718.804	789.772	781.63	308.136	763.402	2.47748	0.107187	12.1744	4.253e-34	3.90213e-32
CNN3	2678.5	2926.49	3968.03	6458.55	6964.46	6345.78	3191.01	6589.6	2.06505	0.117298	8.88526	6.37698e-19	3.04733e-17
COL16A1	52.6343	55.4306	61.7352	212.435	178.452	242.249	56.6001	211.045	3.72871	0.191651	9.73906	2.05451e-22	1.17813e-20
COL18A1.AS1	83.0453	86.9253	55.5617	184.377	233.917	255.497	75.1774	224.597	2.98756	0.250707	6.13479	8.52699e-10	1.92224e-08
COL1A1	148.546	212.904	216.073	2188.48	2432.02	2102.64	192.508	2241.04	11.6413	0.130919	26.9461	6.33975e-160	6.8432e-157
COL4A1	597.692	672.726	638.96	1879.85	2081.14	2066.68	636.459	2009.22	3.15688	0.0920117	17.9667	3.55238e-72	8.6915e-70
COL4A5	104.099	91.9645	67.9088	34.7377	40.9958	52.9919	87.9907	42.9085	0.487648	0.223713	-4.69413	2.6774e-06	3.13131e-05
COL6A3	49.1254	42.8328	35.4978	69.4755	102.489	98.4135	42.4853	90.1262	2.12135	0.201684	5.12614	2.9574e-07	4.28322e-06
COL7A1	1117.02	1373.17	1447.69	7789.27	8114.76	7950.68	1312.63	7951.57	6.05776	0.110869	23.3456	1.52578e-120	8.48426e-118
CREB3L1	192.993	307.388	274.722	737.509	613.731	582.911	258.367	644.717	2.49535	0.147861	8.88342	6.48361e-19	3.09024e-17
CRIP2	26.902	36.5338	33.9544	89.5165	107.313	117.339	32.4634	104.723	3.22587	0.220286	7.44629	9.60041e-14	3.24434e-12
CSF1R	106.438	78.1068	61.7352	265.877	285.765	302.811	82.0934	284.818	3.46943	0.189663	9.25175	2.20852e-20	1.14806e-18
CSRNP1	2241.05	2708.54	2386.07	10558.9	10356.3	9977.62	2445.22	10297.6	4.21132	0.0787453	26.2868	2.71474e-152	2.76752e-149
CTGF	11960.9	13817.3	14896.7	37061.1	37809	33133.2	13558.3	36001.1	2.65528	0.0828699	16.9624	1.55781e-64	3.40308e-62
CTNNB1	5484.5	6016.74	6903.54	12547	12572.4	12154.1	6134.93	12424.5	2.02521	0.101528	9.99422	1.61557e-23	9.9817e-22
CTSD	1174.33	1796.46	1506.34	6268.82	5969.71	5628.5	1492.38	5955.68	3.99074	0.130441	15.2111	2.98525e-52	4.76342e-50
CTSF	17.5448	27.7153	27.7809	8.0164	4.82303	18.9257	24.347	10.5884	0.434895	0.352684	-3.30406	0.000952943	0.00542385
CTSW	51.4647	70.5481	83.3426	18.7049	38.5843	43.5291	68.4518	33.6061	0.490945	0.324727	-3.08258	0.00205217	0.0101914
CXXC4	28.0716	32.7545	29.3242	56.1148	85.6089	96.521	30.0501	79.4149	2.64275	0.283304	4.76625	1.87685e-06	2.2658e-05
CXXC5	97.0811	123.459	98.7764	352.722	341.23	386.084	106.439	360.012	3.38233	0.172362	10.0421	9.95628e-24	6.17222e-22
CYP24A1	61.9915	70.5481	52.475	120.246	149.514	126.802	61.6715	132.187	2.14341	0.191049	5.64968	1.60743e-08	2.94669e-07
CYP26B1	375.458	442.185	430.603	1038.12	1085.18	1103.37	416.082	1075.56	2.58496	0.102541	13.3263	1.62795e-40	1.81048e-38
CYR61	56600.6	71047	71855.2	139504	139438	126168	66500.9	135037	2.0306	0.0920684	11.0652	1.85119e-28	1.4309e-26
DAAM1	409.378	409.431	544.813	1141	1027.31	1078.76	454.541	1082.36	2.38121	0.116612	10.7351	6.96246e-27	5.02997e-25
DDB2	584.826	565.644	486.165	1926.61	2065.46	2121.57	545.545	2037.88	3.73549	0.0899045	21.024	3.95342e-98	1.48051e-95
DDR1	153.224	197.787	175.945	689.41	563.089	641.58	175.652	631.36	3.59438	0.115599	15.8737	9.64395e-57	1.8434e-54
DEPDC4	52.6343	68.0285	69.4521	33.4017	30.144	24.6034	63.3717	29.383	0.463662	0.299319	-3.52223	0.00042794	0.00274666
DHRS1	263.172	296.05	305.589	141.623	160.366	121.124	288.27	141.038	0.489255	0.138958	-7.20823	5.66845e-13	1.78722e-11
DHRS3	2.3393	6.29894	6.17352	49.4345	36.1728	43.5291	4.93725	43.0454	8.71849	0.453051	6.3131	2.73496e-10	6.56034e-09
DLGAP1.AS1	123.983	173.851	192.923	379.443	442.513	363.373	163.585	395.11	2.41531	0.169096	7.53913	4.73123e-14	1.63808e-12
DNAJB2	201.18	267.075	172.859	994.033	939.286	891.399	213.705	941.573	4.40596	0.131691	16.0963	2.70999e-58	5.34713e-56
DUSP1	9489.38	11840.7	10837.6	35949.5	35639.8	34440.9	10722.6	35343.4	3.29617	0.0873909	19.6372	7.44379e-86	2.23924e-83
DUSP6	15246.4	15272.4	17006.5	7141.28	7212.85	7261.78	15841.8	7205.3	0.454829	0.0606388	-18.7161	3.66001e-78	1.0024e-75
DVL1	435.11	680.285	674.457	1350.76	1298.6	1347.51	596.618	1332.29	2.23307	0.124519	9.28071	1.68356e-20	8.80154e-19
DYRK3	498.272	579.502	544.813	1376.15	1356.48	1370.22	540.862	1367.62	2.52858	0.0889552	15.0191	5.50704e-51	8.35159e-49
EDN1	1404.75	1610.01	1690	14612.6	14578.8	13327.5	1568.25	14172.9	9.03741	0.0756592	41.924	0	0
EDN2	21.0537	15.1174	15.4338	42.7541	47.0246	62.4547	17.2017	50.7445	2.94998	0.348768	4.22263	2.41466e-05	0.000225951
EEF1A2	114.626	124.719	109.58	268.549	243.563	280.1	116.308	264.071	2.27044	0.142362	8.15492	3.49414e-16	1.4154e-14
EFCAB4A	32.7502	37.7936	35.4978	122.918	95.2549	87.0581	35.3472	101.744	2.87841	0.212811	7.04696	1.82868e-12	5.44745e-11
EFHD1	14.0358	17.637	18.5206	50.7705	50.6419	54.8845	16.7311	52.099	3.11389	0.288323	5.39408	6.8877e-08	1.12747e-06
EFNA1	46.7861	66.7687	70.9955	141.623	142.28	143.835	61.5168	142.579	2.31773	0.212983	5.66976	1.43001e-08	2.64257e-07
EGR1	4526.55	5286.07	4062.18	1929.28	2083.55	1796.05	4624.93	1936.29	0.418664	0.145752	-8.54842	1.24781e-17	5.57114e-16
EHD1	3491.41	4473.5	4202.63	9670.45	9237.32	8435.17	4055.85	9114.31	2.2472	0.10619	10.9597	5.96933e-28	4.5077e-26
EHMT2	1203.57	1426.08	1271.75	606.574	606.497	598.051	1300.47	603.707	0.464224	0.0909251	-12.1243	7.84826e-34	7.09436e-32
EID3	347.387	296.05	331.827	136.279	138.662	153.298	325.088	142.746	0.439101	0.156163	-7.60519	2.84493e-14	1.01763e-12
ENO3	457.334	508.954	453.754	944.599	1003.19	1116.61	473.347	1021.47	2.15797	0.132325	8.31511	9.16655e-17	3.83158e-15
EPHB3	9.35721	32.7545	13.8904	68.1394	53.0534	41.6365	18.6674	54.2764	2.90756	0.322846	4.5855	4.52911e-06	5.04896e-05
EPS8L2	669.041	793.666	686.805	1862.48	1725.44	1814.97	716.504	1800.96	2.51354	0.0869445	15.2331	2.1326e-52	3.46311e-50
EPSTI1	26.902	25.1957	37.0411	20.041	7.23455	13.248	29.713	13.5078	0.454611	0.398594	-2.66603	0.00767523	0.0303732
ESAM	1338.08	1523.08	1364.35	2962.06	2973.4	2869.13	1408.5	2934.86	2.08367	0.0814389	12.9749	1.69857e-38	1.77095e-36
ETS2	1835.18	2082.43	2432.37	4541.29	4613.23	4273.42	2116.66	4475.98	2.11464	0.0948701	11.3757	5.52827e-30	4.56954e-28
EVI2A	1039.82	924.684	1406.02	444.91	464.217	440.968	1123.51	450.032	0.40056	0.133969	-9.76035	1.6658e-22	9.67325e-21
EVI2B	1456.22	1269.87	1870.58	589.205	704.163	573.448	1532.22	622.272	0.406125	0.127809	-10.0693	7.54873e-24	4.76011e-22
EVPL	1233.98	1432.38	1288.72	2877.89	2751.54	2757.47	1318.36	2795.63	2.12054	0.0788019	13.7312	6.60035e-43	7.81396e-41
F3	3540.54	3808.34	4344.62	8557.51	8341.44	7901.47	3897.83	8266.8	2.12087	0.079517	13.626	2.80495e-42	3.25765e-40
FADS3	232.761	225.502	209.9	586.533	584.793	598.051	222.721	589.793	2.64812	0.101422	13.7295	6.75753e-43	7.94876e-41
FAHD2B	11.6965	16.3772	10.8037	2.67213	4.82303	7.57027	12.9591	5.02181	0.387511	0.478932	-2.49634	0.0125481	0.0451576
FAIM3	150.885	219.203	196.009	101.541	75.9628	73.8101	188.699	83.7713	0.443941	0.207821	-5.49343	3.94211e-08	6.78591e-07
FAM102A	246.797	258.256	228.42	824.353	721.044	789.201	244.491	778.199	3.18293	0.104831	15.8113	2.59863e-56	4.91596e-54
FAM109A	251.475	297.31	327.197	680.058	633.023	586.696	291.994	633.259	2.16874	0.10765	10.4381	1.66097e-25	1.12976e-23
FAM174B	29.2413	30.2349	24.6941	179.033	208.596	134.372	28.0568	174	6.20173	0.260372	9.86067	6.16338e-23	3.66013e-21
FAM214B	600.031	685.324	725.389	1521.78	1579.54	1534.87	670.248	1545.4	2.30571	0.0852995	14.1456	1.98807e-45	2.51593e-43
FAM43A	742.729	903.267	1043.33	2359.49	2337.97	2212.41	896.441	2303.29	2.56937	0.109482	12.4183	2.07887e-35	1.97654e-33
FAM83G	931.043	1064.52	975.417	2501.12	2452.51	2140.49	990.327	2364.71	2.38781	0.0848167	14.7954	1.56884e-49	2.26679e-47
FAM89B	215.216	303.609	211.443	705.443	696.929	501.53	243.423	634.634	2.60713	0.164937	8.31104	9.48655e-17	3.95632e-15
FCGRT	60.8219	60.4698	33.9544	25.3853	18.0864	13.248	51.7487	18.9065	0.365353	0.277205	-4.90982	9.11618e-07	1.16899e-05
FERMT1	190.653	212.904	199.096	370.09	453.365	405.009	200.884	409.488	2.03843	0.122297	8.37468	5.53744e-17	2.37411e-15
FGFRL1	170.769	269.594	290.156	748.197	806.653	719.176	243.506	758.008	3.11289	0.150843	10.8223	2.69894e-27	1.98898e-25
FHL3	396.512	530.37	481.535	1716.85	1587.98	1309.66	469.472	1538.16	3.27636	0.129495	13.1703	1.30017e-39	1.37909e-37
FIBCD1	3.50896	11.3381	15.4338	28.0574	34.967	20.8182	10.0936	27.9475	2.76883	0.351647	4.08439	4.41931e-05	0.000385613
FLJ20021	21.0537	51.6513	43.2147	113.566	106.107	41.6365	38.6399	87.103	2.25422	0.314868	3.68379	0.000229794	0.00160821
FLJ42969	17.5448	28.9751	18.5206	41.4181	50.6419	73.8101	21.6802	55.29	2.55026	0.377598	3.36695	0.000760036	0.00447286
FLNC	1487.8	1922.44	1969.35	4045.61	3742.67	3376.34	1793.2	3721.54	2.07537	0.106311	9.88528	4.82241e-23	2.88245e-21
FLYWCH1	126.322	137.317	115.754	68.1394	48.2303	70.025	126.464	62.1316	0.491298	0.172289	-6.01492	1.7998e-09	3.89462e-08
FOXA3	18.7144	30.2349	18.5206	70.8115	68.7282	45.4216	22.49	61.6538	2.74139	0.313116	4.52664	5.99295e-06	6.48411e-05
FOXF2	273.699	348.961	413.626	1601.94	1630.19	1328.58	345.429	1520.24	4.40102	0.123286	17.332	2.69764e-67	6.11132e-65
FOXP4	659.684	845.317	737.736	2320.75	2423.57	2267.3	747.579	2337.21	3.12637	0.115029	14.2292	6.03284e-46	7.79596e-44
FRMD6	4910.2	4733.02	6263.04	11714.6	11843	10789.5	5302.09	11449	2.15935	0.0962294	11.5117	1.1517e-30	9.73905e-29
FRMD8	602.371	639.972	537.097	1475.02	1480.67	1843.36	593.146	1599.68	2.69695	0.102151	13.8908	7.19899e-44	8.74844e-42
FSCN1	507.629	740.755	623.526	1420.24	1410.74	1186.64	623.97	1339.21	2.14627	0.123724	8.87849	6.77752e-19	3.22196e-17
FSTL3	156.733	270.854	240.767	2132.36	2035.32	1839.58	222.785	2002.42	8.98813	0.142556	22.0971	3.37375e-108	1.43973e-105
FURIN	610.558	642.491	544.813	4630.81	4771.19	4737.1	599.288	4713.03	7.86439	0.0818934	36.194	7.56683e-287	1.98359e-283
GABARAPL1	157.903	206.605	169.772	334.017	411.164	452.324	178.093	399.168	2.24134	0.144861	7.93576	2.09216e-15	8.01484e-14
GADD45B	1576.69	2147.94	1913.79	14008.7	13356.2	11701.7	1879.47	13022.2	6.92864	0.113421	24.513	1.0723e-132	8.55505e-130
GAL	12.8662	7.55872	1.54338	32.0656	25.3209	26.4959	7.32276	27.9608	3.81835	0.431783	3.87865	0.000105036	0.000822975
GALNT4	45.6164	60.4698	54.0183	32.0656	12.0576	22.7108	53.3682	22.278	0.41744	0.373053	-3.24023	0.00119433	0.00652651
GATA2	442.128	690.363	578.768	1569.88	1495.14	1408.07	570.42	1491.03	2.61392	0.132257	10.4339	1.73633e-25	1.17138e-23
GATA3.AS1	166.091	157.473	137.361	49.4345	81.9916	81.3804	153.642	70.9355	0.461694	0.257503	-4.30941	1.63689e-05	0.000160712
GBP1	125.153	113.381	126.557	69.4755	47.0246	54.8845	121.697	57.1282	0.46943	0.20416	-5.22036	1.78577e-07	2.69925e-06
GBP3	422.244	355.26	412.083	192.394	151.926	194.934	396.529	179.751	0.453312	0.122967	-9.31897	1.17476e-20	6.19448e-19
GCKR	54.9736	41.573	75.6257	18.7049	31.3497	24.6034	57.3908	24.886	0.433624	0.331223	-3.43657	0.000589131	0.00360712
GGT1	19.8841	31.4947	13.8904	65.4673	54.2591	64.3473	21.7564	61.3579	2.82022	0.294825	4.79751	1.60652e-06	1.97057e-05
GGT3P	16.3751	15.1174	18.5206	40.082	31.3497	58.6696	16.671	43.3671	2.60134	0.364917	3.54641	0.000390521	0.00254296
GGT5	212.877	240.619	185.206	68.1394	61.4937	105.984	212.901	78.539	0.3689	0.175378	-8.3487	6.90202e-17	2.93176e-15
GJB3	29.2413	50.3915	57.1051	180.369	106.107	109.769	45.5793	132.082	2.89784	0.30755	4.9023	9.47202e-07	1.21207e-05
GLIS2	709.979	1002.79	867.38	3610.05	3602.81	3073.53	860.05	3428.8	3.98674	0.128132	15.491	3.99137e-54	6.90958e-52
GPR132	194.162	172.591	140.448	547.787	678.842	806.234	169.067	677.621	4.00801	0.207556	9.47164	2.75473e-21	1.47805e-19
GPR135	378.967	335.103	205.27	120.246	168.806	164.653	306.447	151.235	0.493512	0.219634	-4.59249	4.37982e-06	4.90358e-05
GPR15	727.523	574.463	583.398	244.5	301.44	242.249	628.461	262.729	0.418052	0.1827	-6.79498	1.08331e-11	2.99379e-10
GPR157	77.197	115.9	100.32	303.287	233.917	244.141	97.8057	260.448	2.66292	0.192984	7.25582	3.99226e-13	1.27627e-11
GPR17	38.5985	41.573	43.2147	110.894	135.045	123.017	41.1287	122.985	2.99025	0.223368	6.97484	3.06219e-12	8.9619e-11
GPR56	321.654	361.559	333.37	1106.26	1151.5	1046.59	338.861	1101.45	3.25045	0.110731	15.296	8.12904e-53	1.33186e-50
HAPLN3	17.5448	20.1566	27.7809	73.4837	81.9916	75.7027	21.8274	77.0593	3.53039	0.282312	6.31564	2.69046e-10	6.46204e-09
HES1	932.212	1148.93	1007.83	11520.9	11818.8	11402.7	1029.66	11580.8	11.2473	0.11825	29.3799	9.91629e-190	1.65422e-186
HEY1	14.0358	10.0783	7.7169	56.1148	53.0534	58.6696	10.6103	55.9459	5.27277	0.356122	6.30695	2.84587e-10	6.7997e-09
HHIP.AS1	126.322	128.498	155.881	305.959	311.086	270.637	136.901	295.894	2.16138	0.166636	6.68309	2.33963e-11	6.24013e-10
HIC1	128.662	152.434	131.187	1564.53	1591.6	1438.35	137.428	1531.5	11.144	0.120148	28.8251	1.03882e-182	1.58852e-179
HID1	23.393	35.274	27.7809	76.1558	69.934	73.8101	28.816	73.3	2.54373	0.238843	5.47226	4.44337e-08	7.53565e-07
HIST1H2BJ	56.1433	103.303	143.534	323.328	242.357	196.827	100.993	254.171	2.51671	0.272292	4.82916	1.37111e-06	1.7046e-05
HIST1H3C	30.4109	78.1068	109.58	224.459	136.251	109.769	72.6993	156.826	2.15719	0.367525	2.91673	0.00353727	0.0160825
HIST1H3H	16.3751	36.5338	66.3654	109.557	108.518	64.3473	39.7581	94.141	2.36784	0.382764	3.15216	0.00162068	0.00839387
HIST1H4C	38.5985	50.3915	97.233	189.721	115.753	119.232	62.0743	141.569	2.28063	0.372508	3.07586	0.00209897	0.0104041
HIVEP1	1389.55	1355.53	1828.91	3409.64	3471.38	3230.61	1524.66	3370.54	2.21068	0.103312	11.0649	1.85588e-28	1.4309e-26
HMOX1	219.895	269.594	251.571	686.738	606.497	688.895	247.02	660.71	2.67472	0.124417	11.3438	7.96427e-30	6.55356e-28
HNRNPA1P33	44.4468	31.4947	24.6941	73.4837	103.695	85.1655	33.5452	87.4481	2.60688	0.250061	5.31342	1.07586e-07	1.69459e-06
HOXB4	87.7239	91.9645	64.822	29.3935	18.0864	26.4959	81.5034	24.6586	0.302547	0.333053	-5.07805	3.81327e-07	5.39503e-06
HOXD1	67.8398	80.6264	98.7764	287.254	291.794	304.703	82.4142	294.584	3.57443	0.164168	11.1828	4.95208e-29	3.9338e-27
HPS3	191.823	186.448	163.598	93.5247	85.6089	85.1655	180.623	88.0997	0.487754	0.154186	-6.65349	2.86226e-11	7.60094e-10
HTR1D	51.4647	60.4698	49.3882	211.098	204.979	208.182	53.7742	208.087	3.86964	0.194712	9.87092	5.56531e-23	3.31569e-21
ID1	5602.63	6959.06	6338.67	31786.4	31071.2	28040.3	6300.12	30299.3	4.80932	0.0941211	23.9982	2.90064e-127	2.04718e-124
ID2	60.8219	54.1708	78.7124	160.328	195.333	174.116	64.5684	176.592	2.73497	0.214815	6.74627	1.51698e-11	4.12393e-10
ID3	2211.81	2908.85	2992.62	8926.26	9108.3	8172.11	2704.43	8735.56	3.2301	0.121589	13.8456	1.3522e-43	1.62176e-41
ID4	104.099	108.342	132.731	268.549	286.971	289.563	115.057	281.694	2.4483	0.14516	8.89361	5.91546e-19	2.84905e-17
IER2	6685.73	9064.17	8871.35	18912	18064.7	15468	8207.08	17481.6	2.13006	0.113303	9.58639	9.1224e-22	5.04205e-20
IER3	20051.3	28913.4	24297.4	63833.2	60306	55268.7	24420.7	59802.6	2.44885	0.119315	10.7726	4.63596e-27	3.36245e-25
IER5L	243.288	391.794	317.936	1584.57	1490.32	1042.8	317.673	1372.57	4.32069	0.159592	13.128	2.27492e-39	2.39912e-37
IFFO2	1084.27	1170.34	1322.68	3448.39	3342.36	3077.32	1192.43	3289.36	2.75853	0.0894452	16.3581	3.81034e-60	7.85616e-58
IFITM10	16.3751	25.1957	18.5206	105.549	103.695	90.8432	20.0305	100.029	4.99385	0.268551	8.36645	5.93805e-17	2.53994e-15
IFNGR2	526.343	525.331	558.704	1895.88	1701.33	1735.48	536.793	1777.56	3.31145	0.0860668	20.0468	2.15311e-89	6.93152e-87
IGFBP4	2877.34	4276.98	4265.9	11949.8	10702.3	9042.69	3806.74	10564.9	2.77532	0.140113	10.4371	1.67798e-25	1.1362e-23
IGFBP7	716.997	920.904	799.471	1935.96	2189.66	1941.77	812.457	2022.46	2.48932	0.101786	12.8868	5.34179e-38	5.50684e-36
IGFBP7.AS1	37.4289	40.3132	24.6941	70.8115	71.1398	85.1655	34.1454	75.7056	2.21716	0.296468	3.70507	0.000211335	0.00149499
IGSF3	168.43	181.409	175.945	356.73	332.789	376.621	175.262	355.38	2.02771	0.120644	8.35619	6.47767e-17	2.7579e-15
IL11	9436.75	12703.7	10674	36112.5	34379.8	31859.5	10938.2	34117.3	3.11911	0.104529	15.6373	4.05328e-55	7.29192e-53
IL13RA1	222.234	291.011	287.069	550.459	648.698	635.903	266.771	611.687	2.29293	0.109395	10.937	7.66627e-28	5.74188e-26
IL17RE	229.252	224.242	197.553	69.4755	67.5225	58.6696	217.016	65.2225	0.300543	0.171911	-9.91172	3.7021e-23	2.24203e-21
IL24	106.438	127.238	132.731	46.7623	37.3785	26.4959	122.136	36.8789	0.30195	0.226315	-7.30082	2.86027e-13	9.30602e-12
IL34	138.019	156.214	131.187	58.7869	53.0534	92.7358	141.807	68.192	0.48088	0.242153	-4.40165	1.07431e-05	0.000109702
IRF2BP2	2252.75	2678.31	2699.37	5213.33	5670.68	4928.25	2543.48	5270.75	2.07226	0.078977	13.3062	2.13043e-40	2.35502e-38
IRF2BPL	2720.61	3744.09	3373.83	8663.05	8861.12	8085.05	3279.51	8536.41	2.60295	0.112869	12.1754	4.20501e-34	3.87748e-32
ITGA10	244.457	238.1	231.507	108.221	100.078	140.05	238.021	116.116	0.48784	0.194242	-5.35136	8.72949e-08	1.39779e-06
ITGA5	871.391	1080.9	1061.85	2609.34	2438.04	2570.11	1004.71	2539.16	2.52726	0.0926885	14.4013	5.07709e-47	6.90108e-45
ITGAV	519.325	377.936	481.535	815.001	969.43	1027.66	459.599	937.365	2.03953	0.117927	8.64867	5.21053e-18	2.37844e-16
ITIH2	78.3667	56.6904	55.5617	29.3935	24.1152	32.1737	63.5396	28.5608	0.449495	0.339273	-3.37407	0.000740659	0.0043814
JAG1	2859.8	3017.19	3403.16	6878.07	7359.95	7237.18	3093.38	7158.4	2.3141	0.076599	15.7837	4.03123e-56	7.39732e-54
JMJD6	1120.53	1182.94	1336.57	2613.35	2446.48	2420.59	1213.34	2493.47	2.05504	0.0787174	13.218	6.9065e-40	7.45495e-38
JMJD7	15.2055	13.8577	16.9772	4.0082	2.41152	9.46284	15.3468	5.29419	0.344971	0.476939	-2.95273	0.00314982	0.0146364
JOSD2	10.5269	21.4164	21.6073	8.0164	6.02879	5.6777	17.8502	6.5743	0.368304	0.431771	-2.7651	0.00569046	0.0237019
JPH2	51.4647	42.8328	63.2786	185.713	190.51	145.728	52.5254	173.984	3.31237	0.193552	8.93714	3.99376e-19	1.9595e-17
JUN	4492.63	5585.9	5577.78	15852.4	14355.8	13085.2	5218.77	14431.1	2.76524	0.103946	14.0658	6.16225e-45	7.69233e-43
JUNB	2375.56	3213.72	2923.16	62868.6	64457.4	57969.3	2837.48	61765.1	21.7676	0.110106	40.1862	0	0
JUP	33.9199	52.9111	50.9316	112.23	90.4319	98.4135	45.9208	100.358	2.18546	0.224563	4.94982	7.42803e-07	9.73602e-06
KANK2	1488.97	1646.54	1463.13	3154.45	3055.39	3173.84	1532.88	3127.89	2.04054	0.0658695	15.5721	1.12639e-54	1.98743e-52
KBTBD11	49.1254	56.6904	57.1051	114.902	131.428	105.984	54.307	117.438	2.16248	0.201081	5.52649	3.26696e-08	5.71484e-07
KBTBD3	56.1433	60.4698	54.0183	25.3853	31.3497	24.6034	56.8771	27.1128	0.476691	0.300625	-3.39869	0.000677102	0.00406438
KCNA7	90.0632	104.562	69.4521	217.779	224.271	259.282	88.0259	233.777	2.65578	0.185288	7.42889	1.09513e-13	3.69405e-12
KCNAB3	77.197	83.1459	77.169	41.4181	38.5843	34.0662	79.1707	38.0229	0.480264	0.274693	-3.7232	0.000196717	0.00141337
KCNIP4	40.9378	37.7936	33.9544	10.6885	25.3209	15.1405	37.5619	17.05	0.453917	0.384879	-2.75777	0.00581975	0.024123
KCNN1	23.393	20.1566	15.4338	74.8197	56.6707	49.2068	19.6611	60.2324	3.06352	0.348162	4.46107	8.15506e-06	8.57076e-05
KCTD11	306.449	379.196	331.827	1835.76	1701.33	1782.8	339.157	1773.29	5.22853	0.0960857	24.7614	2.33682e-135	1.94912e-132
KDM6B	1694.83	1974.09	1810.39	3853.22	4525.21	4201.5	1826.43	4193.31	2.2959	0.102345	11.6745	1.71975e-31	1.48157e-29
KDM7A	43.2771	30.2349	49.3882	164.336	138.662	155.191	40.9667	152.73	3.72814	0.225055	8.3269	8.29864e-17	3.50876e-15
KLF10	4264.55	4769.55	5037.6	28519.7	28973.2	27697.7	4690.57	28396.9	6.05404	0.0696562	37.2445	1.29983e-303	4.77037e-300
KLF13	387.155	454.783	500.055	2352.81	2136.6	2165.1	447.331	2218.17	4.95868	0.100599	22.9348	2.08788e-116	1.03548e-113
KLF4	1233.98	1476.47	1362.81	3373.57	3384.56	3139.77	1357.75	3299.3	2.42997	0.09172	13.9377	3.73871e-44	4.57369e-42
KLF7	508.799	553.047	574.138	1858.47	2218.6	2098.86	545.328	2058.64	3.77505	0.0936309	20.439	7.52221e-93	2.60439e-90
KLHL26	323.994	379.196	283.982	821.681	800.624	802.449	329.057	808.251	2.45626	0.123927	10.3687	3.4417e-25	2.28823e-23
KREMEN2	14.0358	20.1566	12.347	33.4017	40.9958	24.6034	15.5132	33.0003	2.12724	0.327035	3.2092	0.00133106	0.00716065
KRT7	387.155	461.082	421.343	1440.28	1356.48	1457.28	423.193	1418.01	3.35074	0.0854761	20.3341	6.42524e-92	2.18339e-89
KRT8	840.98	1030.51	1049.5	2408.93	2117.31	1782.8	973.661	2103.01	2.1599	0.113663	9.75661	1.72837e-22	1.00049e-20
KRT80	2022.33	2522.09	2415.39	5650.22	5237.82	4905.54	2319.94	5264.53	2.26925	0.0953592	12.3685	3.86831e-35	3.64018e-33
KRT81	108.778	202.826	189.836	1671.42	1345.63	1196.1	167.146	1404.38	8.40211	0.169068	18.0026	1.85782e-72	4.67001e-70
KRT86	11.6965	13.8577	16.9772	57.4509	66.3167	52.9919	14.1771	58.9198	4.15598	0.318078	6.21934	4.99239e-10	1.1567e-08
LAPTM5	557.924	740.755	703.782	2541.2	2258.39	2214.3	667.487	2337.96	3.50264	0.114058	15.7989	3.1671e-56	5.87032e-54
LARP6	423.414	605.958	566.421	1630	1516.84	1292.62	531.931	1479.82	2.78198	0.145097	10.1205	4.48298e-24	2.87632e-22
LBH	44.4468	44.0925	67.9088	805.648	782.537	713.498	52.1494	767.228	14.7121	0.171024	22.5925	5.13826e-113	2.35718e-110
LFNG	271.359	350.221	339.544	3090.32	2911.91	2924.02	320.375	2975.42	9.2873	0.0910334	35.2814	1.13197e-272	2.59645e-269
LIF	2686.69	2894.99	2810.5	5897.4	5878.07	5938.88	2797.39	5904.78	2.11082	0.0684793	15.7146	1.20085e-55	2.18173e-53
LINC00211	168.43	195.267	182.119	88.1804	84.4031	90.8432	181.939	87.8089	0.482629	0.204118	-5.11575	3.12495e-07	4.4961e-06
LINC00461	71.3488	44.0925	72.5389	37.4099	28.9382	20.8182	62.6601	29.0554	0.463699	0.416373	-2.47919	0.0131682	0.0468469
LINC00842	229.252	168.811	140.448	609.246	511.242	567.77	179.504	562.753	3.13505	0.147974	10.969	5.38697e-28	4.1017e-26
LINC00854	67.8398	65.5089	57.1051	28.0574	12.0576	43.5291	63.4846	27.8813	0.439183	0.35221	-3.40729	0.000656118	0.00395395
LINC00883	101.76	146.135	134.274	42.7541	56.6707	54.8845	127.39	51.4364	0.403772	0.210825	-6.08264	1.18222e-09	2.60743e-08
LINC00894	25.7323	39.0534	63.2786	21.3771	20.4979	11.3554	42.6881	17.7435	0.415653	0.370684	-3.08817	0.00201396	0.0100397
LINC01137	38.5985	25.1957	52.475	297.943	283.353	268.745	38.7564	283.347	7.31097	0.231365	12.2845	1.09685e-34	1.02168e-32
LMCD1	45.6164	47.8719	67.9088	193.73	170.012	187.364	53.799	183.702	3.4146	0.193178	9.11885	7.5926e-20	3.84874e-18
LMF1	9.35721	20.1566	7.7169	28.0574	32.5555	22.7108	12.4102	27.7746	2.23804	0.395416	2.74362	0.00607667	0.024996
LMO7.AS1	36.2592	57.9502	52.475	122.918	103.695	100.306	48.8948	108.973	2.22873	0.257818	4.44708	8.70456e-06	9.07549e-05
LOC100131496	375.458	328.804	239.224	145.631	154.337	168.439	314.496	156.136	0.496464	0.187987	-5.38312	7.32057e-08	1.18878e-06
LOC100133331	54.9736	64.2491	50.9316	21.3771	18.0864	39.7439	56.7181	26.4025	0.465503	0.324966	-3.44462	0.000571867	0.00352376
LOC100505666	52.6343	35.274	57.1051	9.35247	12.0576	13.248	48.3378	11.5527	0.238999	0.363978	-5.34985	8.80267e-08	1.40705e-06
LOC100506388	59.6522	74.3274	58.6485	16.0328	34.967	24.6034	64.2094	25.2011	0.392482	0.374733	-3.47031	0.000519857	0.003248
LOC100506655	94.7418	76.847	54.0183	28.0574	40.9958	32.1737	75.2024	33.7423	0.448686	0.346839	-3.25966	0.00111546	0.0061893
LOC100996437	60.8219	80.6264	38.5845	17.3689	39.79	24.6034	60.0109	27.2541	0.454152	0.349331	-3.10189	0.00192288	0.00966443
LOC101059948	24.5627	39.0534	35.4978	158.992	182.07	141.943	33.0379	161.001	4.87322	0.251013	9.00707	2.11644e-19	1.05535e-17
LOC101927229	38.5985	46.6121	57.1051	14.6967	25.3209	15.1405	47.4386	18.3861	0.387576	0.324627	-3.89566	9.79329e-05	0.000774265
LOC101927683	53.804	52.9111	41.6713	25.3853	15.6749	22.7108	49.4621	21.257	0.429763	0.369254	-3.23074	0.00123469	0.006731
LOC101927780	57.3129	50.3915	43.2147	157.656	149.514	141.943	50.3064	149.704	2.97585	0.228895	6.75184	1.45983e-11	3.98475e-10
LOC101929690	12.8662	7.55872	7.7169	66.8033	69.934	52.9919	9.3806	63.2431	6.7419	0.411098	6.3158	2.68768e-10	6.46204e-09
LOC146880	449.146	439.666	441.407	1957.34	2145.04	2093.18	443.406	2065.19	4.65755	0.15333	14.3493	1.07586e-46	1.42029e-44
LOC148696	116.965	113.381	120.384	37.4099	50.6419	37.8514	116.91	41.9677	0.358975	0.273197	-5.29017	1.222e-07	1.90031e-06
LOC284454	890.105	1116.17	788.668	2123.01	2351.23	2647.7	931.648	2373.98	2.54815	0.27351	4.79387	1.63595e-06	1.99864e-05
LOC344887	299.431	253.217	219.16	106.885	113.341	117.339	257.269	112.522	0.43737	0.231068	-5.09981	3.39996e-07	4.85519e-06
LOC730102	36.2592	52.9111	40.1279	12.0246	14.4691	17.0331	43.0994	14.5089	0.336639	0.323826	-4.63675	3.53934e-06	4.03817e-05
LONRF3	396.512	415.73	365.781	849.738	746.365	798.664	392.674	798.255	2.03287	0.0949589	10.701	1.00669e-26	7.24421e-25
LRP1	239.779	255.737	285.525	893.828	834.385	838.407	260.347	855.54	3.28615	0.0961893	17.8459	3.10813e-71	7.50449e-69
LRRC75B	17.5448	15.1174	1.54338	40.082	40.9958	30.2811	11.4019	37.1196	3.25557	0.361807	4.26245	2.02201e-05	0.000193138
LSAMP	59.6522	50.3915	29.3242	84.1722	119.37	104.091	46.456	102.545	2.20735	0.280592	3.90961	9.24439e-05	0.000736261
LTBP3	180.126	202.826	160.512	1830.41	1925.6	2000.44	181.155	1918.82	10.5922	0.119613	28.2607	1.05135e-175	1.28615e-172
LYL1	21.0537	20.1566	26.2375	58.7869	57.8764	56.777	22.4826	57.8135	2.57148	0.284814	4.64808	3.35043e-06	3.83533e-05
LYPD1	85.3846	99.5232	112.667	308.631	280.942	272.53	99.1915	287.368	2.8971	0.179513	8.49923	1.90852e-17	8.45927e-16
MAFB	19.8841	13.8577	12.347	30.7295	50.6419	30.2811	15.3629	37.2175	2.42255	0.378304	3.20279	0.00136103	0.00728557
MAFK	1504.17	1775.04	1643.7	4372.95	4384.14	4161.76	1640.97	4306.28	2.62423	0.0738304	18.8321	4.1204e-79	1.1456e-76
MAPK13	1097.13	1215.69	990.851	2328.76	2316.26	2536.04	1101.23	2393.69	2.17366	0.0868493	12.8204	1.2601e-37	1.2775e-35
MARCKS	3692.59	3822.19	3988.1	8160.69	9281.93	8236.45	3834.29	8559.69	2.2324	0.0897504	12.8774	6.03156e-38	6.18319e-36
MATN3	12.8662	21.4164	29.3242	68.1394	50.6419	60.5622	21.2023	59.7811	2.81956	0.283239	5.17893	2.23167e-07	3.31588e-06
MEGF6	9.35721	12.5979	4.63014	54.7787	53.0534	18.9257	8.86174	42.2526	4.76798	0.384421	5.39766	6.75172e-08	1.10719e-06
MESP1	9.35721	18.8968	12.347	41.4181	37.3785	24.6034	13.5337	34.4667	2.54673	0.34516	3.74449	0.00018076	0.0013126
METRNL	31.5806	39.0534	38.5845	167.008	147.103	113.554	36.4062	142.555	3.91568	0.223885	8.69758	3.39046e-18	1.56713e-16
MEX3B	97.0811	123.459	118.84	305.959	313.497	321.737	113.127	313.731	2.77327	0.153897	9.51904	1.74791e-21	9.43357e-20
MFAP2	92.4025	78.1068	89.5161	367.418	356.905	365.266	86.6751	363.196	4.19032	0.154445	13.2471	4.69057e-40	5.09302e-38
MFSD12	433.941	479.979	410.539	1293.31	1334.77	1366.43	441.486	1331.51	3.01596	0.096041	16.4841	4.77267e-61	9.9521e-59
MFSD7	30.4109	51.6513	60.1919	116.238	124.193	104.091	47.418	114.841	2.42188	0.21881	5.86387	4.52214e-09	9.17935e-08
MICALCL	29.2413	23.936	20.064	52.1066	55.4649	47.3142	24.4137	51.6286	2.11473	0.301154	3.44376	0.00057368	0.00352901
MIDN	7938.43	10661.6	9629.15	20511.3	21537.3	18719.4	9409.72	20256	2.15267	0.104877	10.5069	8.02796e-26	5.62264e-24
MIIP	150.885	128.498	108.037	58.7869	55.4649	73.8101	129.14	62.6873	0.485421	0.18121	-5.85156	4.86976e-09	9.85227e-08
MIR1304	36.2592	37.7936	24.6941	14.6967	15.6749	15.1405	32.9156	15.1707	0.460897	0.377393	-2.83039	0.00464912	0.0200685
MIR137HG	403.53	400.612	364.238	161.664	184.481	181.686	389.46	175.944	0.451764	0.131653	-8.68704	3.71993e-18	1.7108e-16
MIR138.1	51.4647	54.1708	61.7352	26.7213	22.9094	24.6034	55.7903	24.7447	0.443531	0.342219	-3.33882	0.000841359	0.0048734
MIR181A1HG	98.2507	109.601	72.5389	215.107	243.563	221.43	93.4637	226.7	2.42554	0.205855	6.12527	9.05291e-10	2.03829e-08
MIR181A2HG	86.5542	88.1851	78.7124	423.533	496.773	492.068	84.4839	470.791	5.57255	0.166164	14.8092	1.27778e-49	1.86089e-47
MIR21	10.5269	8.81851	23.1507	60.123	53.0534	83.273	14.1654	65.4831	4.62276	0.414519	5.16902	2.35322e-07	3.47678e-06
MIR22HG	1520.55	1564.66	1389.04	3942.73	4194.83	3972.5	1491.42	4036.69	2.70662	0.136482	10.4512	1.44686e-25	9.98116e-24
MIR2682	108.778	112.121	138.904	73.4837	40.9958	62.4547	119.934	58.9781	0.491753	0.223291	-4.53306	5.81351e-06	6.3348e-05
MISP	18.7144	49.1317	38.5845	201.746	204.979	185.472	35.4769	197.399	5.56416	0.216459	11.3201	1.04402e-29	8.55258e-28
MLLT11	83.0453	79.3666	80.2558	173.689	184.481	196.827	80.8892	184.999	2.28707	0.170371	6.89558	5.36468e-12	1.53575e-10
MLXIP	1257.38	1461.35	1211.55	3101.01	3030.07	3094.35	1310.09	3075.14	2.34727	0.0798433	15.3609	2.99549e-53	5.04287e-51
MMP1	203.519	262.036	313.306	90.8525	80.7858	68.1324	259.62	79.9236	0.307848	0.16523	-9.95973	2.28674e-23	1.39872e-21
MMP15	5.84826	13.8577	10.8037	48.0984	28.9382	26.4959	10.1699	34.5108	3.39344	0.350658	4.71086	2.46677e-06	2.90907e-05
MPP4	140.358	110.861	131.187	64.1312	44.6131	47.3142	127.469	52.0195	0.408095	0.207002	-6.10078	1.05551e-09	2.35342e-08
MRC2	374.289	425.808	365.781	980.673	1087.59	1162.04	388.626	1076.77	2.7707	0.0964663	15.1251	1.10696e-51	1.73613e-49
MSANTD1	67.8398	85.6655	55.5617	34.7377	24.1152	37.8514	69.689	32.2348	0.462551	0.323029	-3.44398	0.000573224	0.00352901
MSH5	51.4647	62.9894	55.5617	25.3853	12.0576	32.1737	56.6719	23.2055	0.409471	0.375352	-3.45037	0.000559816	0.0034658
MT2A	3797.86	5074.42	4082.24	10627.1	8869.56	10445.1	4318.17	9980.57	2.31129	0.211431	5.61942	1.91596e-08	3.47068e-07
MTFP1	70.1791	115.9	92.6029	216.443	226.683	191.149	92.8941	211.425	2.27598	0.181856	6.47932	9.21344e-11	2.3065e-09
MYEOV	3029.4	3711.33	3935.62	9397.89	9359.1	8781.51	3558.78	9179.5	2.57939	0.0842913	16.1923	5.71694e-59	1.14028e-56
MYL12B	1852.73	2358.32	2640.72	5603.46	5116.03	4477.82	2283.92	5065.77	2.21801	0.111603	10.2681	9.8098e-25	6.38333e-23
NAB2	488.914	556.826	476.905	1145.01	1112.92	940.606	507.548	1066.18	2.10064	0.106217	10.0669	7.73837e-24	4.86298e-22
NACC2	647.987	739.495	740.823	2062.89	1931.63	1871.75	709.435	1955.42	2.75631	0.0787256	18.5869	4.10076e-77	1.1066e-74
NAT6	94.7418	93.2242	94.1462	231.139	241.152	202.505	94.0374	224.932	2.39194	0.161322	7.76786	7.98218e-15	2.95905e-13
NCOR2	4106.65	4695.23	3881.6	8445.28	8921.41	9436.34	4227.83	8934.34	2.11322	0.10263	10.471	1.17449e-25	8.1328e-24
NEDD9	194.162	170.071	165.142	845.73	936.874	927.358	176.458	903.321	5.11917	0.10953	21.3526	3.69041e-101	1.50487e-98
NET1	2464.46	2748.86	3199.43	9077.24	9101.07	8298.91	2804.25	8825.74	3.14728	0.0861048	19.1803	5.40484e-82	1.57427e-79
NFATC2	788.345	789.887	733.106	1850.45	1836.37	1843.36	770.446	1843.39	2.39263	0.0779315	16.0895	3.02361e-58	5.90247e-56
NGF	31.5806	39.0534	26.2375	62.7951	73.5513	75.7027	32.2905	70.683	2.18897	0.237457	4.55268	5.29666e-06	5.83396e-05
NINJ1	84.2149	122.199	108.037	565.156	412.369	440.968	104.817	472.831	4.51102	0.169017	12.7388	3.59823e-37	3.54987e-35
NIPAL4	44.4468	39.0534	20.064	157.656	201.362	229.001	34.5214	196.006	5.67782	0.322283	7.48466	7.17321e-14	2.43756e-12
NKX3.1	601.201	738.235	876.64	2509.13	2395.84	2087.5	738.692	2330.83	3.15534	0.116535	14.204	8.65013e-46	1.10229e-43
NMRK1	36.2592	37.7936	55.5617	10.6885	13.2633	15.1405	43.2048	13.0308	0.301605	0.355043	-4.58983	4.43603e-06	4.95496e-05
NOG	1024.61	1369.39	1245.51	3417.66	3465.35	2895.63	1213.17	3259.55	2.6868	0.116769	12.1651	4.76588e-34	4.35094e-32
NOL4L	307.618	296.05	256.201	770.91	771.686	804.341	286.623	782.312	2.72941	0.0990206	14.4912	1.37684e-47	1.89962e-45
NPC2	223.403	285.972	325.653	792.287	797.006	705.928	278.343	765.074	2.74867	0.140001	10.4015	2.43996e-25	1.63406e-23
NR2F2	7841.35	8832.37	8738.62	3877.26	4127.31	3518.28	8470.78	3840.95	0.453436	0.102532	-11.0751	1.6572e-28	1.29402e-26
NR2F2.AS1	70.1791	46.6121	63.2786	30.7295	18.0864	20.8182	60.0233	23.2114	0.386706	0.332366	-3.96597	7.30985e-05	0.000600966
NRARP	91.2328	102.043	123.47	348.713	394.283	353.91	105.582	365.636	3.46305	0.152262	11.7802	4.93605e-32	4.29273e-30
NRG4	93.5721	65.5089	69.4521	36.0738	21.7037	51.0993	76.1777	36.2923	0.476416	0.334337	-3.21784	0.00129159	0.00697899
NRP2	162.582	187.708	200.64	867.107	874.175	853.548	183.643	864.943	4.70991	0.113301	19.705	1.95385e-86	5.97553e-84
NT5DC2	185.975	297.31	302.503	1242.54	1232.29	1112.83	261.929	1195.89	4.56569	0.138103	15.8007	3.07842e-56	5.76419e-54
NTF4	16.3751	17.637	26.2375	269.885	335.201	365.266	20.0832	323.451	16.1055	0.264225	14.959	1.36013e-50	2.01278e-48
NUAK1	2922.96	3193.56	3526.63	11734.7	11836.9	11406.5	3214.38	11659.4	3.62725	0.072084	25.7596	2.51462e-146	2.30716e-143
NXPH4	26.902	26.4555	20.064	142.959	148.308	98.4135	24.4738	129.894	5.30745	0.262636	8.89679	5.74834e-19	2.77584e-17
OCIAD2	106.438	131.018	114.21	530.418	399.106	422.043	117.222	450.522	3.84332	0.144854	13.2911	2.60783e-40	2.86549e-38
OPLAH	32.7502	55.4306	50.9316	21.3771	25.3209	15.1405	46.3708	20.6128	0.444522	0.292184	-3.61908	0.000295655	0.00199605
OR7E14P	8.18756	11.3381	16.9772	44.0902	53.0534	47.3142	12.1676	48.1526	3.95744	0.369417	5.21932	1.79584e-07	2.71223e-06
P2RY2	189.484	226.762	157.425	871.115	752.393	719.176	191.223	780.895	4.08368	0.129669	15.5088	3.02468e-54	5.28599e-52
P2RY6	7.01791	5.03915	4.63014	33.4017	28.9382	32.1737	5.5624	31.5045	5.66383	0.436344	5.12835	2.92293e-07	4.23663e-06
P4HA2	70.1791	93.2242	92.6029	205.754	213.419	230.893	85.3354	216.689	2.53926	0.153722	8.66908	4.35623e-18	1.99842e-16
PACSIN3	217.555	303.609	297.873	730.828	643.875	777.845	273.012	717.516	2.62815	0.139671	9.91125	3.71946e-23	2.24514e-21
PADI1	7.01791	15.1174	3.08676	17.3689	47.0246	20.8182	8.40737	28.4039	3.37845	0.46042	3.42927	0.000605196	0.00369071
PAX8	78.3667	71.8079	47.8448	280.574	297.822	285.778	66.0064	288.058	4.36409	0.175869	11.8371	2.50946e-32	2.19279e-30
PCDH1	4.67861	5.03915	15.4338	113.566	71.1398	83.273	8.38385	89.3261	10.6545	0.354636	9.21601	3.08374e-20	1.58063e-18
PCDHB12	30.4109	30.2349	27.7809	9.35247	12.0576	17.0331	29.4756	12.8144	0.434746	0.400381	-2.89859	0.00374847	0.016853
PCDHGA9	57.3129	79.3666	52.475	25.3853	25.3209	37.8514	63.0515	29.5192	0.468176	0.326635	-3.36372	0.000768999	0.00451845
PCDHGB5	59.6522	50.3915	72.5389	29.3935	24.1152	15.1405	60.8609	22.8831	0.37599	0.356238	-3.74377	0.000181283	0.00131588
PCGF2	534.531	745.794	612.722	1833.08	1859.28	1832.01	631.016	1841.46	2.91824	0.120592	12.7478	3.20488e-37	3.17889e-35
PDE4DIP	2497.21	2446.51	2628.38	1151.69	1139.44	1139.33	2524.03	1143.49	0.45304	0.0757894	-15.0318	4.54167e-51	7.00332e-49
PDGFA	374.289	473.68	438.32	2077.58	2031.7	1794.15	428.763	1967.81	4.58951	0.103089	21.2878	1.47389e-100	5.87953e-98
PDGFB	5.84826	16.3772	7.7169	378.107	413.575	450.431	9.9808	414.038	41.4834	0.300012	17.2533	1.05624e-66	2.36367e-64
PDGFRB	18.7144	25.1957	10.8037	54.7787	61.4937	45.4216	18.2379	53.898	2.95527	0.298237	4.97842	6.41063e-07	8.57139e-06
PDLIM4	107.608	168.811	120.384	411.508	461.806	499.638	132.268	457.651	3.46003	0.148235	11.9369	7.603e-33	6.77258e-31
PEA15	2545.16	3106.63	3381.55	8100.57	7783.17	7125.52	3011.11	7669.75	2.54715	0.0970603	13.8637	1.05085e-43	1.26863e-41
PFKFB3	1318.2	1536.94	1413.74	5445.81	5464.5	5087.22	1422.96	5332.51	3.74748	0.0735753	25.8676	1.54304e-147	1.49025e-144
PGF	45.6164	44.0925	46.3014	175.025	132.633	166.546	45.3368	158.068	3.48653	0.210112	8.38287	5.1654e-17	2.23024e-15
PGM5.AS1	52.6343	61.7296	52.475	24.0492	33.7612	18.9257	55.6129	25.5787	0.459942	0.303887	-3.45863	0.000542923	0.00337831
PHF23	1029.29	1466.39	1407.56	3235.95	2796.15	2590.93	1301.08	2874.34	2.20919	0.118512	9.61892	6.65233e-22	3.72166e-20
PHGDH	273.699	260.776	236.137	130.935	126.605	124.909	256.871	127.483	0.496292	0.132235	-7.58715	3.27013e-14	1.15843e-12
PHLDA3	57.3129	66.7687	38.5845	145.631	120.576	92.7358	54.2221	119.648	2.20662	0.232312	4.78526	1.70765e-06	2.07794e-05
PHLDB1	709.979	789.887	702.238	3612.72	3483.44	3709.43	734.034	3601.86	4.90694	0.0845646	27.0446	4.42687e-161	5.07707e-158
PID1	177.787	159.993	209.9	402.156	355.699	459.894	182.56	405.916	2.22347	0.138154	8.27687	1.26452e-16	5.24975e-15
PIK3IP1	19.8841	25.1957	15.4338	142.959	155.543	141.943	20.1712	146.815	7.27844	0.26496	10.495	9.10347e-26	6.3276e-24
PIM1	2174.38	2679.57	2551.21	5889.38	6345.91	5885.89	2468.39	6040.39	2.4471	0.0901181	14.2954	2.3386e-46	3.0435e-44
PITPNM1	239.779	346.441	310.22	677.386	600.468	630.225	298.813	636.026	2.12851	0.120707	9.00297	2.19691e-19	1.09013e-17
PITX3	4.67861	10.0783	12.347	61.4591	36.1728	66.2399	9.03465	54.6239	6.04604	0.430133	5.68454	1.31165e-08	2.451e-07
PLAU	2125.26	2520.83	2599.05	13903.1	13259.7	12670.7	2415.05	13277.9	5.49797	0.0780238	31.4628	2.80935e-217	5.72796e-214
PLCB3	759.104	944.84	810.275	2994.12	2711.75	2922.12	838.073	2876	3.43168	0.0986007	17.969	3.40622e-72	8.4465e-70
PLEC	33246.2	37569.4	33599.4	81294.3	81744.4	79934.5	34805	80991.1	2.327	0.106055	11.4406	2.62144e-30	2.18652e-28
PLEK2	231.591	269.594	239.224	1136.99	1269.66	1277.48	246.803	1228.05	4.97581	0.105527	21.8295	1.21781e-105	5.07882e-103
PLEKHA1	308.788	328.804	305.589	581.189	683.665	764.597	314.394	676.484	2.15171	0.124842	8.75869	1.97533e-18	9.19984e-17
PLEKHG4B	226.912	209.125	149.708	419.525	401.518	408.795	195.248	409.946	2.09961	0.148102	7.10096	1.2389e-12	3.78265e-11
PLIN4	50.295	50.3915	66.3654	29.3935	14.4691	32.1737	55.684	25.3454	0.455165	0.3413	-3.2816	0.0010322	0.0057941
PMEPA1	466.691	610.997	745.453	3898.64	3848.78	3665.9	607.714	3804.44	6.26026	0.119089	22.1465	1.12763e-108	4.92666e-106
PMP22	912.328	1021.69	1163.71	2125.68	2129.37	2079.93	1032.57	2111.66	2.04504	0.0848587	12.182	3.87808e-34	3.59408e-32
PODXL	1299.48	1329.08	1325.76	3330.81	3442.44	3605.34	1318.11	3459.53	2.62462	0.0688568	20.1678	1.87659e-90	6.14919e-88
PPAPDC1A	122.813	115.9	154.338	376.771	273.707	264.959	131.017	305.146	2.32905	0.161377	7.56308	3.93626e-14	1.38108e-12
PPP1R13L	1877.29	2043.37	1602.03	5497.91	5600.75	6007.01	1840.9	5701.89	3.09734	0.0946774	17.15	6.28619e-66	1.38978e-63
PPP1R14B	1367.32	1979.13	2169.99	6630.9	6162.63	5176.17	1838.81	5989.9	3.25748	0.155448	10.869	1.61914e-27	1.19804e-25
PPP1R14C	49.1254	50.3915	43.2147	101.541	108.518	90.8432	47.5772	100.301	2.10817	0.252355	4.20858	2.56984e-05	0.000238284
PRDM1	400.021	405.651	438.32	785.607	926.023	789.201	414.664	833.61	2.01033	0.104001	9.71378	2.63374e-22	1.49164e-20
PROCR	101.76	147.395	169.772	304.623	253.209	287.67	139.642	281.834	2.01826	0.150151	6.76195	1.36149e-11	3.73443e-10
PROSER2	791.854	1055.7	939.919	2907.28	2706.93	2433.84	929.158	2682.68	2.88722	0.113684	13.4077	5.44979e-41	6.13519e-39
PRPH2	101.76	69.2883	55.5617	21.3771	16.8806	15.1405	75.5366	17.7994	0.23564	0.375146	-5.37534	7.64366e-08	1.23906e-06
PRR5L	74.8577	74.3274	50.9316	161.664	129.016	134.372	66.7056	141.684	2.12402	0.182394	5.78194	7.38427e-09	1.457e-07
PRRT1	63.1612	102.043	67.9088	29.3935	47.0246	30.2811	77.7042	35.5664	0.457715	0.272444	-3.94328	8.03759e-05	0.000651966
PSMD2	4886.8	5850.45	5945.1	14321.3	13522.6	12831.6	5560.79	13558.5	2.43823	0.085732	14.9646	1.25054e-50	1.86564e-48
PTGES	298.261	321.246	327.197	1007.39	958.578	864.903	315.568	943.625	2.99024	0.0937594	16.8718	7.25636e-64	1.56652e-61
PTHLH	25.7323	34.0143	23.1507	161.664	227.888	151.405	27.6324	180.319	6.52564	0.267191	9.89133	4.53953e-23	2.72224e-21
PTPRH	56.1433	57.9502	32.411	25.3853	16.8806	28.3885	48.8348	23.5515	0.482268	0.362853	-2.87841	0.0039968	0.017741
PTX3	878.408	937.282	1157.54	447.582	446.131	459.894	991.075	451.202	0.455265	0.116486	-9.6745	3.86977e-22	2.17823e-20
PWWP2B	59.6522	80.6264	91.0595	205.754	157.954	149.513	77.1127	171.074	2.21849	0.188649	6.11044	9.93542e-10	2.22339e-08
PXDC1	706.47	842.798	808.732	2940.68	2979.43	2702.59	786	2874.23	3.65679	0.0812483	23.0104	3.66973e-117	1.87054e-114
QPCT	8.18756	20.1566	3.08676	69.4755	48.2303	94.6284	10.477	70.7781	6.75558	0.344343	7.30281	2.81818e-13	9.18536e-12
QRFP	123.983	100.783	61.7352	196.402	218.242	306.596	95.5004	240.413	2.51741	0.231964	5.54599	2.92296e-08	5.14744e-07
RABEP2	247.966	239.36	206.813	85.5083	110.93	104.091	231.38	100.176	0.432953	0.145921	-8.23524	1.79196e-16	7.38931e-15
RARA	898.293	1131.29	926.029	4312.82	4173.13	3946	985.203	4143.99	4.20622	0.0895601	23.0722	8.80905e-118	4.61846e-115
RARA.AS1	94.7418	81.8862	80.2558	241.828	259.238	232.786	85.6279	244.617	2.85675	0.17687	8.47434	2.3641e-17	1.03289e-15
RARRES1	61.9915	60.4698	57.1051	21.3771	25.3209	41.6365	59.8555	29.4448	0.491932	0.336781	-3.06816	0.00215381	0.0106272
RCL1	149.715	222.982	171.315	392.804	377.402	403.117	181.338	391.108	2.15679	0.136573	8.05297	8.08116e-16	3.16182e-14
RGMB.AS1	129.831	134.797	118.84	69.4755	37.3785	73.8101	127.823	60.2214	0.471131	0.28645	-3.75049	0.00017649	0.00128617
RHOB	811.738	1190.5	966.156	6588.14	6870.41	6336.32	989.465	6598.29	6.66855	0.113605	23.989	3.62231e-127	2.46183e-124
RHOD	7.01791	3.77936	4.63014	24.0492	18.0864	17.0331	5.14247	19.7229	3.83529	0.43638	3.79906	0.000145247	0.00108037
RHOF	72.5184	132.278	101.863	541.107	587.204	444.753	102.22	524.355	5.12968	0.209529	11.1151	1.05942e-28	8.30788e-27
RIPK4	912.328	920.904	867.38	1966.69	2016.03	1837.68	900.204	1940.13	2.15522	0.0753984	14.6765	9.12146e-49	1.30765e-46
RNASET2	39.7682	40.3132	30.8676	17.3689	6.02879	20.8182	36.983	14.7386	0.398525	0.320492	-4.07109	4.6794e-05	0.000406182
RND1	4.67861	3.77936	13.8904	120.246	109.724	92.7358	7.44947	107.569	14.4398	0.378723	9.82549	8.74447e-23	5.14298e-21
RNF208	8.18756	22.6762	18.5206	76.1558	98.8722	58.6696	16.4614	77.8992	4.73222	0.304606	7.12331	1.05368e-12	3.22251e-11
RNF24	595.353	600.918	581.855	1203.8	1146.68	1222.6	592.709	1191.02	2.00946	0.0782402	12.8053	1.5308e-37	1.52664e-35
RPL13P5	28.0716	23.936	37.0411	12.0246	12.0576	3.78514	29.6829	9.28911	0.312945	0.399144	-3.63437	0.000278666	0.0018967
RPS26P11	9.35721	6.29894	12.347	24.0492	30.144	15.1405	9.3344	23.1112	2.47592	0.427952	2.86318	0.0041941	0.0184428
RRAD	44.4468	35.274	64.822	223.123	262.855	223.323	48.1809	236.434	4.90721	0.213166	10.694	1.08635e-26	7.78692e-25
RWDD2A	80.706	107.082	81.7992	212.435	206.185	132.48	89.8624	183.7	2.04423	0.215914	4.75504	1.98408e-06	2.38897e-05
RYBP	1491.31	1473.95	1989.42	3451.06	3626.92	3274.14	1651.56	3450.71	2.08936	0.105185	10.0941	5.8655e-24	3.73722e-22
S100A10	1375.51	1892.2	2122.15	3961.44	3998.3	3578.85	1796.62	3846.19	2.14079	0.123968	8.82448	1.0997e-18	5.18755e-17
S100A11	863.203	1339.15	1404.48	3084.98	3045.75	2583.35	1202.28	2904.69	2.41599	0.218578	5.72016	1.06426e-08	2.03641e-07
S100A16	789.515	1014.13	1206.92	2265.97	2193.28	1760.09	1003.52	2073.11	2.06583	0.141871	7.34734	2.02197e-13	6.68527e-12
S1PR5	93.5721	195.267	192.923	518.394	483.509	382.299	160.587	461.401	2.87321	0.210514	7.17311	7.33112e-13	2.28786e-11
SAMD1	498.272	597.139	569.508	1638.02	1294.98	1196.1	554.973	1376.37	2.48006	0.114222	11.4477	2.41406e-30	2.03201e-28
SAMD11	16.3751	17.637	10.8037	41.4181	47.0246	52.9919	14.9386	47.1448	3.15591	0.340761	4.56827	4.91773e-06	5.45589e-05
SCG2	31.5806	30.2349	33.9544	9.35247	9.64607	18.9257	31.9233	12.6414	0.395993	0.34544	-3.78425	0.000154172	0.00114352
SCN1B	5.84826	7.55872	4.63014	44.0902	39.79	37.8514	6.01237	40.5772	6.74895	0.399189	6.22985	4.66896e-10	1.08587e-08
SCT	5.84826	16.3772	6.17352	38.7459	38.5843	35.9588	9.46634	37.763	3.98919	0.405379	4.58538	4.53168e-06	5.04896e-05
SDPR	474.879	497.616	591.115	231.139	192.921	181.686	521.203	201.916	0.387403	0.126536	-10.6435	1.87069e-26	1.32537e-24
SDR16C5	35.0896	57.9502	55.5617	20.041	32.5555	17.0331	49.5338	23.2099	0.468566	0.322524	-3.11833	0.00181879	0.0092451
SEMA7A	1271.41	1536.94	1495.54	4664.21	4572.24	4320.73	1434.63	4519.06	3.14998	0.0834575	19.8074	2.57056e-87	7.99487e-85
SERPINB2	33.9199	28.9751	41.6713	10.6885	20.4979	13.248	34.8554	14.8115	0.42494	0.300518	-3.63999	0.000272647	0.00185849
SERPINE1	2262.11	2874.83	2947.86	36767.2	36772	33184.3	2694.93	35574.5	13.2005	0.102205	36.289	2.41634e-288	7.38996e-285
SERTAD1	200.01	245.658	248.484	963.304	852.471	711.605	231.384	842.46	3.64095	0.132171	14.0785	5.15153e-45	6.4747e-43
SERTAD3	1301.82	1758.66	1606.66	3890.63	3664.3	3660.23	1555.71	3738.38	2.403	0.0958199	13.1713	1.2836e-39	1.36942e-37
SERTAD4	894.784	944.84	1105.06	2029.48	2272.86	2225.66	981.562	2176	2.21688	0.091947	12.4877	8.71358e-36	8.32783e-34
SH3BP1	39.7682	65.5089	49.3882	201.746	190.51	210.075	51.5551	200.777	3.89442	0.191369	10.0825	6.60524e-24	4.19399e-22
SIK1	1990.75	2621.62	2600.6	11335.2	12296.3	11446.2	2404.32	11692.6	4.86316	0.0985616	23.0819	7.03108e-118	3.79471e-115
SIX2	166.091	253.217	223.79	766.902	856.089	709.713	214.366	777.568	3.62729	0.14711	12.5853	2.54274e-36	2.46875e-34
SIX3	12.8662	23.936	18.5206	41.4181	28.9382	49.2068	18.4409	39.8543	2.16119	0.357518	2.92287	0.00346818	0.0158272
SKI	2690.2	2810.59	2833.65	7506.02	8156.96	7574.06	2778.14	7745.68	2.78808	0.06648	22.2275	1.86186e-109	8.33297e-107
SKIL	966.132	929.723	1117.41	9229.55	9805.23	9678.59	1004.42	9571.12	9.52899	0.106599	30.4012	5.30357e-203	9.73204e-200
SLC10A3	204.689	197.787	202.183	475.64	477.48	406.902	201.553	453.341	2.24924	0.115483	10.1298	4.07612e-24	2.62445e-22
SLC18B1	164.921	138.577	151.251	81.5001	78.3743	56.777	151.583	72.2171	0.47642	0.179375	-5.74856	9.0007e-09	1.74776e-07
SLC19A2	470.2	474.94	547.9	1628.66	1712.18	1752.52	497.68	1697.79	3.4114	0.11741	15.0244	5.08331e-51	7.77323e-49
SLC1A4	98.2507	163.772	118.84	291.262	288.176	299.026	126.954	292.821	2.30651	0.155922	7.64697	2.05772e-14	7.4183e-13
SLC25A27	78.3667	45.3523	44.758	36.0738	10.8518	22.7108	56.159	23.2121	0.413329	0.423817	-2.81089	0.00494049	0.0211324
SLC25A45	146.206	192.747	100.32	382.115	362.933	367.158	146.425	370.735	2.53192	0.179355	7.33943	2.14508e-13	7.07952e-12
SLC26A2	593.013	498.876	706.868	1318.7	1478.26	1506.48	599.586	1434.48	2.39245	0.119471	10.4995	8.68254e-26	6.05797e-24
SLC27A5	24.5627	35.274	23.1507	14.6967	10.8518	9.46284	27.6625	11.6705	0.421888	0.382655	-2.96464	0.00303037	0.0141747
SLC29A1	1787.23	2168.09	2017.2	7415.17	7520.32	7129.3	1990.84	7354.93	3.69438	0.0799151	23.5466	1.35948e-122	8.04722e-120
SLC29A3	31.5806	51.6513	30.8676	138.951	139.868	128.695	38.0332	135.838	3.57156	0.229729	7.80024	6.17882e-15	2.29983e-13
SLC2A8	198.841	226.762	185.206	434.222	447.336	422.043	203.603	434.534	2.13422	0.120185	9.03489	1.64171e-19	8.23097e-18
SLC30A1	1124.04	1320.26	1248.6	2998.13	3036.1	2994.04	1230.96	3009.43	2.44477	0.0700219	18.4072	1.15042e-75	2.97328e-73
SLC35F2	1345.1	1436.16	1384.41	3385.59	3352.01	3249.54	1388.56	3329.05	2.39749	0.0598779	21.059	1.89272e-98	7.23572e-96
SLC46A3	128.662	139.836	109.58	308.631	327.966	348.232	126.026	328.277	2.60483	0.160272	8.48801	2.10206e-17	9.25009e-16
SLC5A10	136.849	134.797	128.101	342.033	288.176	350.125	133.249	326.778	2.45239	0.138192	9.2272	2.7779e-20	1.42786e-18
SLC7A11.AS1	485.405	415.73	399.736	179.033	215.831	217.645	433.624	204.17	0.470845	0.15674	-6.92508	4.35739e-12	1.25523e-10
SLC7A5	6351.21	8152.08	8150.59	16350.8	14977.9	14695.8	7551.3	15341.5	2.03164	0.105277	9.6768	3.78388e-22	2.13643e-20
SMAD6	183.635	194.007	237.681	925.894	945.315	887.614	205.108	919.608	4.48353	0.117693	18.4007	1.29718e-75	3.30602e-73
SMAD7	984.847	1153.96	1166.8	15911.2	16532.2	15221.9	1101.87	15888.4	14.4195	0.0817273	47.0265	0	0
SMOX	335.69	380.456	245.398	1726.2	1785.73	1760.09	320.514	1757.34	5.48287	0.115517	21.072	1.43741e-98	5.61202e-96
SNAI1	94.7418	119.68	141.991	1227.85	1173.2	1105.26	118.804	1168.77	9.83778	0.14504	22.7011	4.36897e-114	2.10975e-111
SNORD94	49.1254	61.7296	33.9544	18.7049	26.5267	22.7108	48.2698	22.6475	0.469185	0.374314	-2.82217	0.00476998	0.0205082
SNX18	465.521	534.15	654.394	1122.3	1225.05	1095.8	551.355	1147.71	2.08163	0.113251	9.36203	7.82179e-21	4.16029e-19
SNX30	456.164	483.758	515.489	968.648	959.784	991.705	485.137	973.379	2.0064	0.0842892	11.9178	9.56131e-33	8.47584e-31
SOCS2.AS1	28.0716	40.3132	29.3242	13.3607	13.2633	11.3554	32.5697	12.6598	0.388699	0.373352	-3.39015	0.000698549	0.00417298
SOCS3	9196.97	10699.4	10402.4	27146.2	26895.7	26439.2	10099.6	26827	2.65625	0.0846172	16.6148	5.44327e-62	1.16144e-59
SOCS6	921.686	932.242	1180.69	2136.37	2242.71	1937.99	1011.54	2105.69	2.08167	0.101383	10.4449	1.54568e-25	1.06229e-23
SOX4	481.897	551.787	520.119	1182.42	1290.16	1328.58	517.934	1267.05	2.44636	0.0938219	13.707	9.22258e-43	1.07793e-40
SPACA6P	270.19	327.545	253.114	696.091	670.402	734.316	283.616	700.27	2.46907	0.131363	9.83136	8.24956e-23	4.88321e-21
SPHK1	136.849	234.32	216.073	1231.85	1143.06	967.102	195.748	1114	5.69103	0.14269	17.5085	1.23469e-68	2.86791e-66
SPINT1	2.3393	0	1.54338	8.0164	7.23455	5.6777	1.29423	6.97622	5.39025	0.60983	2.61946	0.00880693	0.0338515
SPRY1	3246.95	3508.51	3654.73	1357.44	1404.71	1315.33	3470.06	1359.16	0.391682	0.0728163	-18.505	1.88184e-76	5.00461e-74
SPSB1	607.049	733.196	709.955	2033.49	2065.46	1799.83	683.4	1966.26	2.87718	0.0936458	16.2765	1.44925e-59	2.95485e-57
SRRD	354.404	376.676	338	844.394	915.171	923.573	356.36	894.379	2.50976	0.0974538	13.5422	8.8089e-42	1.01027e-39
SSBP3.AS1	30.4109	23.936	15.4338	38.7459	43.4073	68.1324	23.2602	50.0952	2.15369	0.341745	2.97406	0.00293885	0.0138241
STBD1	38.5985	45.3523	38.5845	124.254	90.4319	79.4878	40.8451	98.058	2.40073	0.257452	4.83245	1.34864e-06	1.6778e-05
STOML1	135.68	165.032	145.078	297.943	325.555	319.844	148.597	314.447	2.11611	0.153702	6.97158	3.13398e-12	9.14284e-11
STXBP5L	157.903	112.121	141.991	72.1476	53.0534	79.4878	137.338	68.2296	0.496799	0.236703	-4.28677	1.81287e-05	0.000176198
SYCP2	60.8219	35.274	46.3014	18.7049	18.0864	18.9257	47.4658	18.5723	0.391278	0.337747	-3.85288	0.000116737	0.000898034
SYNPO	609.389	856.655	751.627	3150.44	2954.11	2469.8	739.223	2858.12	3.86638	0.133874	14.4941	1.32056e-47	1.83579e-45
SYT15	697.112	676.506	567.964	1839.76	1906.3	2089.39	647.194	1945.15	3.00552	0.109716	14.3662	8.4314e-47	1.12932e-44
TAGLN	30.4109	30.2349	58.6485	108.221	77.1686	92.7358	39.7648	92.7086	2.33143	0.237883	5.13308	2.85045e-07	4.14796e-06
TAGLN2	1245.68	1894.72	1777.97	6348.99	5972.12	5859.39	1639.46	6060.17	3.69645	0.122383	15.3341	4.52579e-53	7.54983e-51
TARSL2	81.8756	74.3274	91.0595	217.779	243.563	227.108	82.4208	229.483	2.78429	0.171265	8.58499	9.08421e-18	4.09571e-16
TAS1R3	47.9557	49.1317	58.6485	112.23	139.868	136.265	51.912	129.454	2.49372	0.240264	5.42168	5.90406e-08	9.77794e-07
TBC1D19	52.6343	26.4555	58.6485	20.041	16.8806	30.2811	45.9128	22.4009	0.487901	0.344306	-2.95383	0.00313854	0.0145988
TBC1D2B	660.853	623.595	620.439	2247.26	2353.64	2460.34	634.962	2353.75	3.70691	0.0792994	23.747	1.18057e-124	7.73692e-122
TCHH	23.393	35.274	15.4338	13.3607	6.02879	11.3554	24.7003	10.2483	0.414905	0.439975	-2.7114	0.00669996	0.0271561
TCN2	10.5269	30.2349	26.2375	8.0164	10.8518	7.57027	22.3331	8.81283	0.394609	0.396953	-2.89741	0.00376252	0.016889
TFEB	8.18756	10.0783	12.347	98.8689	83.1973	92.7358	10.2043	91.6007	8.97667	0.322506	9.34525	9.16768e-21	4.86205e-19
TGFB1	596.522	749.573	625.069	3241.3	3467.76	3147.34	657.055	3285.47	5.00029	0.116482	19.8301	1.63628e-87	5.17686e-85
TGFBI	154.394	162.513	189.836	1299.99	1316.69	1413.75	168.914	1343.48	7.95361	0.104266	28.623	3.47269e-180	4.90184e-177
TGIF1	3827.1	4227.85	4452.65	9850.82	10209.2	10062.8	4169.2	10040.9	2.40836	0.0652371	19.4237	4.86198e-84	1.43899e-81
THBS1	19863	21639.4	25924.2	80055.8	78215.2	72545.9	22475.5	76938.9	3.42323	0.116927	15.107	1.45676e-51	2.26539e-49
TIGD3	5.84826	5.03915	7.7169	49.4345	47.0246	39.7439	6.20144	45.401	7.32104	0.421748	6.3375	2.33523e-10	5.67408e-09
TINAGL1	1579.03	1651.58	1395.22	6231.41	6459.25	6232.23	1541.94	6307.63	4.0907	0.082979	24.4115	1.29167e-131	9.87593e-129
TIPARP	3593.17	3431.66	4832.33	9170.76	9169.79	8590.36	3952.39	8976.97	2.27128	0.105147	11.222	3.18016e-29	2.54829e-27
TMEM14E	59.6522	68.0285	49.3882	30.7295	9.64607	11.3554	59.023	17.2437	0.292152	0.437458	-3.83658	0.00012476	0.000951516
TMEM182	44.4468	37.7936	23.1507	16.0328	13.2633	15.1405	35.1304	14.8122	0.421636	0.351122	-3.40259	0.000667499	0.00401199
TMEM51	245.627	311.167	339.544	768.238	651.11	607.514	298.779	675.621	2.26127	0.137554	8.56657	1.06612e-17	4.79493e-16
TMEM88	28.0716	40.3132	23.1507	45.4263	68.7282	88.9507	30.5118	67.7017	2.21887	0.339435	3.20998	0.00132746	0.00714759
TMEM91	42.1075	39.0534	41.6713	9.35247	13.2633	24.6034	40.944	15.7397	0.38442	0.384332	-3.51342	0.000442377	0.00282746
TNFRSF12A	3372.11	4861.52	4961.97	11512.9	10240.5	9063.51	4398.53	10272.3	2.33539	0.143292	8.47841	2.28291e-17	9.99794e-16
TNNT1	168.43	196.527	131.187	72.1476	68.7282	105.984	165.381	82.2865	0.497556	0.188567	-5.43542	5.46677e-08	9.11128e-07
TOP1MT	321.654	303.609	282.439	125.59	139.868	185.472	302.567	150.31	0.496782	0.150667	-6.78537	1.15793e-11	3.19039e-10
TPM1	518.156	482.498	527.836	1724.86	1823.11	1856.61	509.497	1801.53	3.53589	0.0881758	20.6053	2.46167e-94	8.68685e-92
TPST2	168.43	172.591	162.055	470.295	443.719	482.605	167.692	465.54	2.77616	0.113796	12.8197	1.27267e-37	1.28316e-35
TREH	16.3751	21.4164	12.347	118.91	156.749	204.397	16.7129	160.019	9.57459	0.321272	9.82584	8.71471e-23	5.14196e-21
TRIB1	1019.94	1208.14	1282.55	2561.24	2972.2	2585.25	1170.21	2706.23	2.31261	0.0980941	12.3231	6.80548e-35	6.37146e-33
TRIM17	136.849	120.94	70.9955	62.7951	38.5843	37.8514	109.595	46.4103	0.423471	0.310895	-3.88585	0.000101973	0.000802059
TRIM47	369.61	524.071	464.558	1879.85	1776.08	1468.63	452.746	1708.19	3.77294	0.131728	14.4793	1.63639e-47	2.24088e-45
TRPV2	24.5627	27.7153	21.6073	9.35247	4.82303	7.57027	24.6284	7.24859	0.294318	0.431265	-3.73555	0.000187304	0.00135369
TSC22D3	111.117	141.096	121.927	434.222	434.073	380.406	124.713	416.234	3.33752	0.136609	12.6974	6.11288e-37	5.99847e-35
TSGA10	50.295	57.9502	47.8448	21.3771	28.9382	22.7108	52.03	24.342	0.467846	0.293572	-3.57249	0.000353603	0.00233824
TSKU	1003.56	1306.4	1461.58	4054.96	4114.05	3601.56	1257.18	3923.52	3.12089	0.121632	13.4487	3.13467e-41	3.57275e-39
TSPAN12	91.2328	115.9	120.384	307.295	276.119	263.067	109.172	282.16	2.58454	0.147803	9.28781	1.5749e-20	8.28062e-19
TSPAN2	15.2055	20.1566	12.347	49.4345	40.9958	58.6696	15.903	49.7	3.12519	0.328461	4.69204	2.70497e-06	3.15952e-05
TTC9	26.902	59.21	50.9316	150.976	73.5513	94.6284	45.6812	106.385	2.32886	0.281797	4.23182	2.3181e-05	0.000217693
TUBA4A	258.493	411.95	424.43	1229.18	1296.19	1133.65	364.958	1219.67	3.34196	0.13823	12.5528	3.83869e-36	3.70736e-34
TUFT1	671.38	663.908	688.348	2461.03	2265.62	2293.79	674.545	2340.15	3.46922	0.085748	20.8845	7.41471e-97	2.7212e-94
TXK	80.706	78.1068	98.7764	32.0656	34.967	58.6696	85.8631	41.9007	0.487995	0.262932	-3.97463	7.04892e-05	0.000582385
UBL3	600.031	725.637	717.672	1481.7	1536.14	1423.21	681.114	1480.35	2.17342	0.0844644	13.2842	2.85787e-40	3.12154e-38
UBTD1	86.5542	154.954	182.119	330.008	350.876	259.282	141.209	313.389	2.21932	0.194435	5.9159	3.30059e-09	6.86687e-08
UCA1	615.237	641.232	676.001	1333.39	1446.91	1432.67	644.156	1404.33	2.1801	0.0970083	11.5762	5.4384e-31	4.64161e-29
UCN2	216.386	335.103	257.745	1255.9	1274.49	1228.28	269.745	1252.89	4.64472	0.132899	16.5744	1.06748e-61	2.25152e-59
ULK1	404.7	469.901	347.261	919.214	1051.42	1137.43	407.287	1036.02	2.54372	0.11979	11.1271	9.2615e-29	7.29393e-27
UNC5B	1.16965	11.3381	1.54338	53.4427	48.2303	39.7439	4.68371	47.139	10.0645	0.452941	6.63008	3.35505e-11	8.85402e-10
UPP1	400.021	438.406	371.955	819.009	830.768	868.689	403.461	839.488	2.08072	0.0963265	10.8809	1.42076e-27	1.0555e-25
USB1	1327.55	1550.8	1359.72	3103.68	2876.94	2757.47	1412.69	2912.7	2.06181	0.109073	9.53111	1.55608e-21	8.423e-20
USP2	7.01791	20.1566	9.26029	72.1476	92.8434	39.7439	12.1449	68.245	5.61922	0.407892	5.81688	5.99544e-09	1.20368e-07
VASN	145.037	177.63	182.119	956.624	892.261	836.515	168.262	895.133	5.31988	0.136908	17.5458	6.40112e-69	1.5059e-66
VDR	419.905	506.434	469.188	1628.66	1704.94	1608.68	465.176	1647.43	3.54152	0.0897487	20.2981	1.33635e-91	4.45855e-89
VEGFA	4781.54	5556.92	5823.18	11712	12016.6	11302.4	5387.21	11677	2.16754	0.0747897	14.9044	3.08656e-50	4.53108e-48
VGLL3	623.424	564.385	776.321	2465.04	2670.76	2507.65	654.71	2547.82	3.89152	0.109839	17.8141	5.49621e-71	1.30981e-68
VMP1	1458.56	1408.44	1666.85	5902.74	6209.66	7167.15	1511.28	6426.52	4.25236	0.112803	18.4304	7.49038e-76	1.96355e-73
WNT10B	30.4109	20.1566	23.1507	78.8279	72.3455	56.777	24.5728	69.3168	2.82088	0.278547	5.21892	1.79969e-07	2.71581e-06
WNT7B	295.922	399.353	336.457	1143.67	1090.01	1069.3	343.91	1100.99	3.20139	0.124471	13.4125	5.10774e-41	5.78562e-39
WNT9A	22.2234	35.274	41.6713	293.935	277.324	246.034	33.0562	272.431	8.24144	0.207997	14.5111	1.0304e-47	1.45445e-45
YPEL2	35.0896	47.8719	44.758	114.902	90.4319	115.447	42.5732	106.927	2.5116	0.231915	5.61525	1.96279e-08	3.545e-07
ZC3H12A	840.98	929.723	859.663	3952.08	4045.32	3717	876.789	3904.8	4.45353	0.0912131	23.5679	8.23406e-123	5.0365e-120

## Sheet: IP 2.5h TGF-B.v.TGF-B 6h Common
Official Gene Symbol
ABCA1
ABL1
ACTA2
AFAP1L2
AHNAK2
ANGPTL2
ASPHD2
BCL11A
BPGM
C15orf57
C1orf198
C22orf24
CDC42SE1
CELSR2
CFP
CHST15
CHST3
COL4A1
COL4A5
COL6A3
CSF1R
CTSD
CYP26B1
DHRS1
DVL1
EFCAB4A
EFHD1
EFNA1
EPSTI1
ETS2
FERMT1
FHL3
FLNC
FOXA3
FRMD6
GPR157
HPS3
IGFBP4
IRF2BPL
ITGA5
ITGAV
JMJD6
KBTBD11
KRT7
KRT8
KRT80
LARP6
LMCD1
LOC730102
MAFB
MFAP2
MLLT11
MPP4
NCOR2
NINJ1
NPC2
NR2F2
NT5DC2
OCIAD2
P2RY6
P4HA2
PEA15
PLEK2
PODXL
PPP1R14B
PRR5L
PSMD2
RNASET2
SDPR
SDR16C5
SLC26A2
SLC29A1
SLC7A5
SNX30
SOX4
SRRD
TAGLN
TAGLN2
TGFBI
TMEM91
TNFRSF12A
TUBA4A
ULK1
