# Supplementary material for: Flura-seq identifies organ-specific metabolic adaptations during early metastatic colonization
Source: eLife journal article supplement (doi:10.7554/elife.43627), 2019-03-25
Supplement: supp [file elife-43627-supp-v1.zip › elife_poa_e43627_Supplementary_File_3.xlsx]

## Sheet: Brain.v.Lung_DEGs.in culture
Official Gene Symbol	baseMean	log2FoldChange	lfcSE	stat	pvalue	padj
IL2RB	43.6019	-2.44074	0.433696	-5.62776	1.83e-08	1.51e-05
SIRPB1	84.9428	-2.3404	0.371357	-6.30229	2.93e-10	7.26e-07
GIMAP2	10.4656	-2.27752	0.432769	-5.26268	1.42e-07	6.2e-05
KRT86	166.169	-2.04794	0.374778	-5.46441	4.64e-08	2.78e-05
LGR5	287.401	-2.02736	0.429416	-4.72121	2.34e-06	0.000580264
MMP9	143.992	-1.96939	0.416123	-4.7327	2.22e-06	0.000559862
COLEC12	168.666	-1.89563	0.434233	-4.36546	1.27e-05	0.00214069
KRT81	4425.1	-1.89494	0.403625	-4.69479	2.67e-06	0.000629066
ANXA10	213.663	-1.86879	0.421107	-4.43781	9.09e-06	0.0016066
FPR1	211.119	-1.86778	0.377185	-4.95189	7.35e-07	0.000227376
C1orf106	61.7162	-1.78754	0.342894	-5.2131	1.86e-07	7.66e-05
SERPINA1	200.833	-1.78122	0.404532	-4.40316	1.07e-05	0.00186386
MAGEE1	83.9421	-1.76099	0.317643	-5.54395	2.96e-08	2e-05
PMEPA1	755.527	-1.74027	0.307222	-5.66454	1.47e-08	1.29e-05
SORL1	178.92	-1.73798	0.372631	-4.66409	3.1e-06	0.000697457
PTPRU	636.13	-1.71627	0.365888	-4.6907	2.72e-06	0.000631764
PREX1	20.838	-1.70704	0.429389	-3.9755	7.02e-05	0.00724266
HAS3	57.5015	-1.67821	0.42808	-3.92031	8.84e-05	0.00852781
PTGES	6288.11	-1.66246	0.360221	-4.61511	3.93e-06	0.000833468
CMKLR1	410.874	-1.65159	0.427181	-3.86626	0.000110515	0.0103217
GRAMD1B	380.942	-1.63345	0.434353	-3.76065	0.000169471	0.0139041
FAM109A	384.243	-1.56335	0.330386	-4.73189	2.22e-06	0.000559862
ALDH3A1	68.7075	-1.5544	0.356784	-4.35671	1.32e-05	0.00220301
PDE8B	241.105	-1.54523	0.316804	-4.87755	1.07e-06	0.00030675
ANGPT1	458.67	-1.53775	0.360256	-4.26849	1.97e-05	0.00286521
LCTL	242.888	-1.51113	0.348681	-4.33384	1.47e-05	0.0023912
RARRES3	201.79	-1.49891	0.392883	-3.81517	0.00013609	0.0119582
MNX1-AS1	20.5315	-1.49835	0.402257	-3.72485	0.000195434	0.0154262
KCNN3	20.7092	-1.49109	0.434183	-3.43424	0.000594225	0.0347411
OLFML2B	117.368	-1.49056	0.357563	-4.16867	3.06e-05	0.00382334
FLJ45974	184.809	-1.47515	0.251852	-5.8572	4.71e-09	5.65e-06
PAK6	221.708	-1.46615	0.422188	-3.47273	0.000515193	0.0320839
SAMD13	52.0772	-1.4616	0.362001	-4.03757	5.4e-05	0.00594096
LYPD6	531.021	-1.43723	0.28217	-5.09349	3.52e-07	0.000127325
KRT83	33.2663	-1.42768	0.414577	-3.4437	0.000573816	0.0336805
PBX1	144.01	-1.42327	0.368747	-3.85973	0.000113511	0.0104052
CSGALNACT1	205.582	-1.41177	0.307788	-4.58681	4.5e-06	0.000903925
KAZALD1	195.035	-1.40673	0.357692	-3.93279	8.4e-05	0.00820326
LOC101929555	48.4761	-1.40514	0.38446	-3.65483	0.000257349	0.0187335
CAPS	22.1661	-1.39695	0.408716	-3.4179	0.000631073	0.0362192
ADAMTS15	177.476	-1.38613	0.309077	-4.48473	7.3e-06	0.00133848
FAM20C	327.525	-1.37642	0.367816	-3.74216	0.000182445	0.0146449
NAP1L3	381.421	-1.36692	0.358651	-3.8113	0.00013824	0.0120757
SUFU	1413.65	-1.35654	0.311724	-4.35174	1.35e-05	0.00222851
LOXL4	532.349	-1.35084	0.329534	-4.09923	4.15e-05	0.0047718
GPR55	18.1091	-1.33831	0.406284	-3.29403	0.00098763	0.0497163
LYPD1	90.7387	-1.33453	0.404029	-3.30304	0.000956411	0.0484734
TLR3	246.259	-1.31249	0.251581	-5.21697	1.82e-07	7.66e-05
SPOCK3	107.683	-1.29508	0.387988	-3.33793	0.000844036	0.0438111
GPR68	790.348	-1.27992	0.279798	-4.57444	4.78e-06	0.000920904
TCTN1	554.29	-1.27791	0.257387	-4.96494	6.87e-07	0.000217129
OAS1	284.442	-1.25159	0.29212	-4.2845	1.83e-05	0.00271982
RIBC2	107.912	-1.24804	0.296036	-4.21583	2.49e-05	0.00327045
BCL11A	72.4245	-1.24014	0.308229	-4.02344	5.74e-05	0.00625904
CSF1R	106.815	-1.23678	0.32075	-3.8559	0.000115303	0.0105046
LOC101928794	29.5838	-1.21385	0.345136	-3.51702	0.000436422	0.0284249
PDE7B	896.555	-1.20806	0.2681	-4.50599	6.61e-06	0.00122634
CARD10	1474.81	-1.20107	0.347276	-3.45854	0.000543107	0.0326524
RPGRIP1L	282.449	-1.19845	0.277452	-4.3195	1.56e-05	0.00247051
PSMB9	1620.7	-1.19801	0.213463	-5.61225	2e-08	1.56e-05
DGAT2	315.666	-1.17871	0.349142	-3.37602	0.000735423	0.0401508
C1QTNF6	304.978	-1.17674	0.202006	-5.82526	5.7e-09	6.02e-06
PDGFD	481.32	-1.12854	0.294728	-3.82909	0.000128616	0.0113687
FSCN1	1029.78	-1.127	0.325261	-3.46491	0.000530411	0.0322812
CCDC153	55.8343	-1.11633	0.3033	-3.68062	0.000232663	0.0176278
PDE4B	860.515	-1.11328	0.254662	-4.37158	1.23e-05	0.0021055
ADAM19	502.824	-1.10532	0.228412	-4.83916	1.3e-06	0.000352056
EDARADD	94.14	-1.09818	0.31795	-3.45393	0.000552484	0.0330822
RXRA	352.333	-1.08802	0.304188	-3.5768	0.000347832	0.0241369
PLXNA1	1809.73	-1.08479	0.324074	-3.34735	0.000815874	0.0431165
RAMP1	846.425	-1.06562	0.230391	-4.62526	3.74e-06	0.000817019
E2F2	155.579	-1.06083	0.268806	-3.94646	7.93e-05	0.00803334
ARHGEF40	212.96	-1.05368	0.264475	-3.98406	6.77e-05	0.00713518
TRABD2A	406.549	-1.05336	0.284414	-3.70363	0.000212535	0.0165568
CLU	2280.69	-1.05201	0.303093	-3.47092	0.000518687	0.0320839
AHRR	485.033	-1.04162	0.245857	-4.23669	2.27e-05	0.00306238
TCTEX1D2	105.155	-1.02846	0.235074	-4.37506	1.21e-05	0.00209626
IQCD	110.261	-1.02099	0.292737	-3.48775	0.000487108	0.0311138
ARMC4	308.798	-1.02049	0.259747	-3.92877	8.54e-05	0.00828699
APOL3	384.703	-1.00373	0.291468	-3.44371	0.000573799	0.0336805
SARS	12752.4	1.00024	0.217353	4.60194	4.19e-06	0.000875478
PER2	47.9711	1.00158	0.302984	3.30571	0.000947344	0.0481783
FLCN	894.425	1.00778	0.207935	4.84662	1.26e-06	0.000350177
NR1D1	212.086	1.01108	0.267016	3.78658	0.000152736	0.0130352
OCLN	859.59	1.01451	0.261725	3.87625	0.000106077	0.00996985
FGF5	1262.23	1.01883	0.29702	3.43016	0.000603223	0.0351288
IRAK2	1765.72	1.02351	0.301025	3.40009	0.000673641	0.0377493
ABL2	1919.53	1.02739	0.267143	3.84583	0.000120147	0.0108132
NEAT1	228.799	1.03011	0.290241	3.54916	0.000386462	0.0260862
CLDN12	4188.03	1.03225	0.195116	5.29047	1.22e-07	5.49e-05
FNIP1	1441.21	1.03226	0.248126	4.16021	3.18e-05	0.00390826
CACNB1	342.069	1.03964	0.223507	4.65148	3.3e-06	0.000730455
ZFP36	1373.46	1.05039	0.255431	4.11224	3.92e-05	0.00461812
SLC22A15	218.133	1.05184	0.298485	3.52392	0.000425216	0.0279401
TMEM154	2600.97	1.06689	0.305949	3.48716	0.000488183	0.0311138
LUCAT1	259.125	1.06931	0.32	3.34158	0.000833019	0.0434047
SYVN1	319.062	1.07777	0.268722	4.01073	6.05e-05	0.00642067
STARD4	2139.09	1.07906	0.22461	4.80416	1.55e-06	0.000412097
KIAA1244	250.466	1.09092	0.257808	4.23152	2.32e-05	0.00310535
C3orf52	267.067	1.09319	0.189927	5.75587	8.62e-09	8e-06
FBXL19-AS1	214.191	1.09614	0.28032	3.91031	9.22e-05	0.00877449
TRAF1	696.257	1.1023	0.263346	4.18575	2.84e-05	0.00360755
ZSCAN20	180.423	1.10625	0.257955	4.28856	1.8e-05	0.00269753
IL18	531.05	1.12236	0.262855	4.26987	1.96e-05	0.00286521
PLEKHM1	958.937	1.1257	0.334252	3.36781	0.00075767	0.0410635
ARID3B	180.735	1.14167	0.205776	5.54814	2.89e-08	2e-05
PRSS12	137.627	1.14525	0.342517	3.34363	0.000826909	0.043238
LURAP1L	345.548	1.15133	0.33069	3.48161	0.000498405	0.0314949
PLIN2	9537.88	1.162	0.231742	5.0142	5.33e-07	0.000175991
SH2D5	128.044	1.16744	0.288724	4.04346	5.27e-05	0.00588052
GAB2	125.156	1.18723	0.314428	3.77584	0.00015947	0.0133867
PCK2	1387.99	1.18867	0.223995	5.30667	1.12e-07	5.18e-05
TMEM217	133.213	1.20906	0.287377	4.20722	2.59e-05	0.00336764
BACH1	2256.83	1.21409	0.308006	3.94178	8.09e-05	0.00807493
MGLL	3586.77	1.22251	0.179002	6.82958	8.52e-12	3.16e-08
C6orf132	150.236	1.22808	0.329803	3.72369	0.000196334	0.0154262
CELF2	646.51	1.25057	0.291313	4.29289	1.76e-05	0.00267244
LOC100506746	81.791	1.26074	0.336714	3.74425	0.000180933	0.0146449
DHCR7	7211.44	1.26201	0.340971	3.70123	0.000214554	0.0165568
ZNF165	125.085	1.28152	0.235128	5.45032	5.03e-08	2.78e-05
CTH	1333.47	1.28412	0.338495	3.79362	0.000148465	0.0128181
HSPA1B	2083.34	1.28849	0.299434	4.30309	1.68e-05	0.00260542
SLAMF7	621.68	1.29302	0.345903	3.73809	0.000185426	0.0148042
PRG2	45.3465	1.29341	0.314488	4.11273	3.91e-05	0.00461812
KRT34	85.3716	1.30891	0.33492	3.90811	9.3e-05	0.00879833
SLCO1B3	1135.32	1.32064	0.327038	4.0382	5.39e-05	0.00594096
BHLHA15	10.1138	1.32398	0.390148	3.39353	0.000689991	0.0383172
ANK2	382.862	1.32587	0.329942	4.01849	5.86e-05	0.00630294
TM4SF19	40.6529	1.33681	0.385682	3.46608	0.000528102	0.0322812
RND3	8199.41	1.3492	0.250951	5.37635	7.6e-08	4.03e-05
PTPRH	159.641	1.35222	0.377393	3.58304	0.000339618	0.0236776
CD33	201.332	1.38102	0.406781	3.39499	0.000686303	0.0383143
ZFAND2A	689.777	1.38924	0.254768	5.45294	4.95e-08	2.78e-05
FAM160A1	61.6343	1.39944	0.382846	3.65536	0.000256819	0.0187335
CLDN1	201.624	1.40327	0.424048	3.30923	0.000935525	0.0478716
GTPBP2	1047.2	1.42244	0.288938	4.92298	8.52e-07	0.000253149
LCP1	1202.67	1.42451	0.426908	3.33681	0.000847462	0.0438111
ATF3	126.357	1.42941	0.414804	3.44599	0.000568966	0.0336805
TRIB3	2567.84	1.42994	0.411221	3.47731	0.000506475	0.0318693
SLC16A1	49.8778	1.44353	0.374543	3.8541	0.000116155	0.0105177
RRAD	280.821	1.45243	0.428076	3.39292	0.000691516	0.0383172
SESN2	729.447	1.46155	0.356532	4.09934	4.14e-05	0.0047718
RASGRP3	210.314	1.46958	0.345171	4.25753	2.07e-05	0.00292326
RPLP0P2	35.6266	1.50423	0.434538	3.46167	0.000536836	0.0324065
ALOXE3	27.0021	1.50745	0.43444	3.46988	0.000520688	0.0320839
PPP1R15A	11333.3	1.50748	0.305168	4.93983	7.82e-07	0.000236965
LOC653712	25.8886	1.5097	0.383196	3.93975	8.16e-05	0.00807493
SERPINF1	108.917	1.54246	0.357074	4.31971	1.56e-05	0.00247051
GPNMB	29.2437	1.54337	0.433758	3.55814	0.00037349	0.0254419
PLEKHA7	160.245	1.55773	0.366084	4.25513	2.09e-05	0.00292699
PRKAR1B	618.968	1.56603	0.389381	4.02185	5.77e-05	0.00625904
LIPG	679.024	1.56707	0.415041	3.7757	0.000159559	0.0133867
IL32	54.7363	1.56881	0.428744	3.65908	0.00025312	0.0187006
IL1A	264.288	1.57796	0.429642	3.67273	0.00023997	0.0179977
HSPA1A	703.726	1.58283	0.270621	5.84889	4.95e-09	5.65e-06
DNAJB9	2134.91	1.59463	0.329205	4.84387	1.27e-06	0.000350177
NR4A1	111.808	1.63108	0.401014	4.06738	4.75e-05	0.00534879
MMP3	132.499	1.65129	0.434038	3.80448	0.000142103	0.0123405
TMEM45A	583.711	1.65709	0.36206	4.57685	4.72e-06	0.000920904
SPNS2	29.212	1.65731	0.416627	3.97792	6.95e-05	0.00721934
NCF2	287.704	1.65835	0.395229	4.19592	2.72e-05	0.00350927
MAP3K7CL	258.177	1.67049	0.306105	5.45725	4.84e-08	2.78e-05
SUN3	147.161	1.67151	0.416344	4.01474	5.95e-05	0.00635796
HECW2	356.506	1.67297	0.30699	5.4496	5.05e-08	2.78e-05
TNFAIP3	585.337	1.67428	0.332077	5.04186	4.61e-07	0.00015922
CSPG4	139.788	1.68714	0.373654	4.51524	6.32e-06	0.00118882
ARID3A	45.0264	1.68751	0.290228	5.81442	6.08e-09	6.02e-06
STARD5	18.6839	1.69421	0.412264	4.10952	3.96e-05	0.00463599
THY1	37.8974	1.70559	0.417011	4.09004	4.31e-05	0.00492676
FOSB	40.0532	1.72704	0.433745	3.9817	6.84e-05	0.0071557
MCOLN3	192.103	1.7488	0.20454	8.54991	1.23e-17	1.83e-13
CHAC1	462.149	1.74988	0.342314	5.1119	3.19e-07	0.000118404
LINC00702	28.8874	1.79898	0.337041	5.33757	9.42e-08	4.66e-05
ATP6V0D2	113.244	1.80352	0.433554	4.15985	3.18e-05	0.00390826
CARD11	167.651	1.81733	0.43377	4.18961	2.79e-05	0.00357719
LOC344887	67.9149	1.83385	0.390344	4.69803	2.63e-06	0.000629066
ZNF114	1043.09	1.84474	0.305253	6.04333	1.51e-09	2.49e-06
RCAN1	2291.07	1.88884	0.295931	6.3827	1.74e-10	5.17e-07
CXCL2	537.144	1.91012	0.429842	4.44379	8.84e-06	0.00158142
IFNLR1	51.4734	1.91438	0.407201	4.70133	2.58e-06	0.000629066
VWDE	171.587	1.91549	0.31362	6.10769	1.01e-09	1.88e-06
DDIT3	1861.38	1.95472	0.312349	6.25812	3.9e-10	8.27e-07
HDAC9	2568.55	2.05998	0.285777	7.20837	5.66e-13	2.8e-09
ADM2	46.2164	2.11636	0.398197	5.31487	1.07e-07	5.11e-05
PTGS2	1873.13	2.11926	0.432853	4.89603	9.78e-07	0.00028475
TPPP3	31.5809	2.15047	0.429949	5.00168	5.68e-07	0.000183475
NUPR1	109.977	2.17682	0.434156	5.01393	5.33e-07	0.000175991
FBN2	56.5377	2.25544	0.433584	5.20185	1.97e-07	7.92e-05
PTPRR	130.329	2.29353	0.382655	5.99371	2.05e-09	3.05e-06
SPARC	1729.86	3.15738	0.428079	7.3757	1.63e-13	1.21e-09

## Sheet: Brain.v.MFP_DEGs.in culture
Official Gene Symbol	baseMean	log2FoldChange	lfcSE	stat	pvalue	padj
ACADSB	957.18	-1.19077	0.310912	-3.82993	0.000128178	0.0143663
ACVR2B-AS1	14.2725	-1.60561	0.430974	-3.72555	0.000194894	0.018452
ADM2	46.2164	1.69881	0.396303	4.28664	1.81397e-05	0.00373653
AMPD3	631.757	1.08693	0.310814	3.49704	0.000470448	0.0336669
APOL3	384.703	-1.22642	0.291314	-4.20995	2.55425e-05	0.00463506
ARHGAP20	14.3594	2.05237	0.422918	4.85287	1.21686e-06	0.000488122
ARHGAP30	697.094	-1.45836	0.400069	-3.64527	0.000267108	0.0228737
ART3	13.8321	-1.78552	0.434199	-4.11221	3.91885e-05	0.00597699
ASTN1	16.7805	-1.49842	0.420385	-3.56439	0.000364705	0.0280768
ATOH8	33.8475	-1.51009	0.423461	-3.56607	0.000362373	0.0280388
ATP6V0D2	113.244	1.64952	0.433535	3.80482	0.000141906	0.015233
BCAM	135.89	-1.08652	0.303242	-3.58302	0.000339638	0.0269641
BCL11A	72.4245	1.49244	0.33016	4.52036	6.17358e-06	0.00184517
BHLHA15	10.1138	1.45476	0.389259	3.73724	0.000186051	0.0179376
BTBD19	61.601	1.52416	0.391719	3.89095	9.98511e-05	0.0118909
C4BPB	695.429	-1.28347	0.304845	-4.21023	2.55115e-05	0.00463506
CAPS2	45.7787	-1.35105	0.350493	-3.85471	0.000115869	0.0132797
CCDC17	25.47	1.40316	0.394102	3.56039	0.000370305	0.0282228
CHAC1	462.149	1.32348	0.341944	3.87045	0.000108634	0.0125448
CMKLR1	410.874	-2.11466	0.427149	-4.95064	7.39714e-07	0.000388809
CNTN1	47.063	-1.77991	0.426624	-4.17209	3.01814e-05	0.00510698
COL6A3	268.201	-1.6406	0.413534	-3.96726	7.27031e-05	0.00955356
CSF1R	106.815	-1.1857	0.321048	-3.69322	0.000221432	0.0202113
CSGALNACT1	205.582	-1.09725	0.30837	-3.55821	0.000373385	0.0283159
CTH	1333.47	1.22935	0.338497	3.63178	0.000281474	0.0238361
CXCL2	537.144	1.70801	0.429852	3.97348	7.083e-05	0.00938836
DDIT3	1861.38	1.53074	0.312214	4.90286	9.4453e-07	0.000423455
DGKD	1442.87	1.18513	0.26449	4.48081	7.43595e-06	0.00202404
DLL4	39.158	1.61257	0.414779	3.88778	0.000101166	0.011954
DMBT1	280.915	-1.68455	0.403937	-4.17033	3.04165e-05	0.00510698
DNAJB9	2134.91	1.41676	0.329177	4.30394	1.67786e-05	0.00355216
DOK4	87.1686	1.13505	0.297126	3.82011	0.00013339	0.0146847
DUSP10	1760.35	1.10809	0.289216	3.83135	0.00012744	0.0143663
EFEMP1	5927.62	-1.75252	0.221487	-7.9125	2.52263e-15	7.69048e-12
ENTPD3	507.22	1.72695	0.244163	7.07294	1.51683e-12	2.569e-09
ERCC6L	1508.06	-1.02958	0.298513	-3.44902	0.000562632	0.0384583
ERN1	243.387	1.12221	0.270532	4.14818	3.35135e-05	0.00549296
FAM24B	207.075	-1.56962	0.321934	-4.87561	1.08472e-06	0.000459287
FAM83A	62.7151	-1.73355	0.434546	-3.98933	6.62606e-05	0.00893815
FBLN1	515.111	-1.10642	0.317871	-3.48071	0.000500079	0.0351514
FBN2	56.5377	2.00483	0.433492	4.62484	3.74885e-06	0.00126986
FCHO1	347.558	-1.39563	0.338531	-4.12261	3.74605e-05	0.0058867
FLJ22447	70.9596	-1.24686	0.369901	-3.37081	0.000749487	0.0470609
FMN2	48.1294	-1.45071	0.418328	-3.46787	0.000524606	0.036514
FRS3	147.732	1.04499	0.273871	3.81563	0.000135836	0.0146847
FSIP2	120.548	1.50339	0.40577	3.70502	0.000211377	0.0197669
GALNT16	33.6329	-1.1588	0.345889	-3.35022	0.000807477	0.0484582
GALNT3	4370.48	1.4164	0.311366	4.54899	5.39029e-06	0.00167682
GPR1	1146.57	1.1662	0.307779	3.7891	0.000151195	0.0155906
GRAMD1B	380.942	-2.01822	0.434349	-4.64655	3.37537e-06	0.00116934
GTPBP2	1047.2	1.08428	0.288759	3.75494	0.00017338	0.0176189
HDAC9	2568.55	1.25205	0.285529	4.38504	1.15967e-05	0.00275857
HECW2	356.506	2.39979	0.308869	7.7696	7.8732e-15	2.00019e-11
HERPUD1	6827.05	1.43227	0.388224	3.68929	0.000224879	0.0203946
HHIP	129.737	-1.32571	0.331184	-4.00295	6.25588e-05	0.00859084
HOXD3	56.0029	1.59701	0.42101	3.7933	0.000148661	0.0155906
HSD17B7P2	66.0071	1.5786	0.364651	4.32906	1.49746e-05	0.00326082
HSPA1A	703.726	1.05544	0.270083	3.90783	9.31307e-05	0.0114483
HSPA1B	2083.34	1.07854	0.299391	3.60245	0.000315235	0.0257013
HSPA5	89539.7	1.19522	0.343242	3.48214	0.000497423	0.0351514
HTR2C	83.7106	1.31002	0.387186	3.38344	0.000715827	0.0459371
HTRA1	169.798	-1.16653	0.344366	-3.38748	0.000705376	0.0457534
IGFLR1	262.253	-1.21543	0.285209	-4.26153	2.03028e-05	0.00397186
IL13RA2	116.281	-1.72388	0.416462	-4.13935	3.48292e-05	0.00562626
IL1A	264.288	1.60326	0.429631	3.7317	0.00019019	0.0181191
INHBA	279.166	-1.78462	0.423327	-4.21571	2.48997e-05	0.0046286
JPH2	32.9831	-1.66951	0.428737	-3.89401	9.85992e-05	0.0118501
KHK	400.341	-1.36891	0.318338	-4.30019	1.70652e-05	0.00356336
KIAA1244	250.466	1.09824	0.258031	4.25625	2.07888e-05	0.00401119
KLF4	154.086	1.45396	0.37006	3.92898	8.53058e-05	0.0106583
KRT7	1812.62	-1.51667	0.421537	-3.59796	0.000320725	0.0260043
KRT80	4252.68	-1.03302	0.292677	-3.52956	0.000416259	0.0306523
KRT81	4425.1	-2.63795	0.403611	-6.53588	6.32383e-11	9.63942e-08
KRT83	33.2663	-2.26889	0.412909	-5.4949	3.90942e-08	2.83768e-05
KRT86	166.169	-1.82954	0.375025	-4.87845	1.06923e-06	0.000459287
LAS1L	2766.36	-1.07772	0.27004	-3.99095	6.58099e-05	0.00893815
LCP1	1202.67	1.57404	0.426919	3.68697	0.000226944	0.0203946
LINC00174	20.9242	1.42199	0.423783	3.35546	0.000792317	0.0478668
LINC00184	34.5584	1.52961	0.407922	3.74977	0.000176999	0.0176339
LOC339166	90.1886	1.70815	0.38031	4.49147	7.07334e-06	0.00196035
LOC344887	67.9149	1.45948	0.389185	3.75009	0.000176768	0.0176339
LOC653712	25.8886	1.28379	0.381656	3.36374	0.000768938	0.047072
LOX	4792.65	1.56206	0.422062	3.70101	0.000214743	0.0198383
LSS	4930.48	1.22781	0.276592	4.43905	9.03551e-06	0.00233438
LUCAT1	259.125	1.1372	0.32024	3.55109	0.000383644	0.0288073
MAGEE1	83.9421	-1.31037	0.319403	-4.10255	4.08622e-05	0.00604721
MAGI2-AS3	111.984	-1.1788	0.263488	-4.47383	7.68306e-06	0.00205461
MAP3K7CL	258.177	1.55212	0.305956	5.07303	3.91539e-07	0.000238729
2019-03-01	47.9415	-2.03582	0.424908	-4.7912	1.65786e-06	0.00063177
MB	35.716	-2.03299	0.413288	-4.91906	8.69607e-07	0.000423455
MPZL2	165.356	-1.75392	0.432516	-4.05517	5.00982e-05	0.00727283
MUM1L1	63.6339	3.30423	0.379359	8.71004	3.03779e-18	2.31525e-14
MYH3	92.0287	1.36948	0.328429	4.16979	3.04884e-05	0.00510698
NRK	237.404	2.17228	0.350569	6.19644	5.77562e-10	6.77214e-07
NUPR1	109.977	1.88214	0.43419	4.33482	1.45877e-05	0.00322261
OSGIN1	798.615	1.33686	0.356738	3.74745	0.000178644	0.0176822
P2RX4	1061.47	1.00427	0.27124	3.70253	0.000213457	0.0198383
P2RY6	51.0242	-1.26697	0.334232	-3.79069	0.000150231	0.0155906
PAGE5	135.44	-3.64482	0.433989	-8.39841	4.52567e-17	2.2995e-13
PARM1	485.336	1.512	0.342084	4.41997	9.87159e-06	0.00250788
PDE7B	896.555	-1.5939	0.267942	-5.94867	2.70331e-09	2.7471e-06
PER2	47.9711	1.0155	0.303816	3.34249	0.000830295	0.0494382
PLAC1	56.3365	-1.61106	0.321151	-5.0165	5.26211e-07	0.000308501
PLEKHG4	567.581	1.79222	0.288467	6.21292	5.20091e-10	6.60646e-07
PLIN2	9537.88	1.13816	0.231746	4.91124	9.05008e-07	0.000423455
PLTP	213.601	-1.3797	0.386204	-3.57246	0.000353638	0.0276436
PMEPA1	755.527	-2.23748	0.307043	-7.28717	3.16532e-13	6.89271e-10
PPP1R15A	11333.3	1.56317	0.305175	5.12221	3.0198e-07	0.000191795
PRG2	45.3465	1.1239	0.313255	3.5878	0.000333478	0.0267537
PSG4	84.0508	-1.82596	0.404987	-4.50869	6.52301e-06	0.00187604
PSMB9	1620.7	-1.01747	0.213564	-4.76423	1.89576e-06	0.000704807
PTGES	6288.11	-2.30438	0.360204	-6.39743	1.58014e-10	2.18964e-07
PTGS2	1873.13	1.99366	0.432852	4.60588	4.1072e-06	0.001361
RARRES3	201.79	-1.32283	0.39301	-3.36589	0.000762978	0.047072
RASD2	27.1961	-1.79829	0.413215	-4.35195	1.34934e-05	0.00306986
RASGRP3	210.314	1.24516	0.344852	3.61072	0.000305347	0.0252957
RCAN1	2291.07	1.5457	0.295835	5.22488	1.7427e-07	0.000115496
RGS7	107.388	-1.96684	0.352117	-5.58575	2.32698e-08	1.86685e-05
RORA	117.265	1.7592	0.361941	4.86046	1.17112e-06	0.000482471
RPS6KA2	341.528	1.6513	0.432583	3.8173	0.000134918	0.0146847
RRAS2	1149.26	1.33813	0.400541	3.34081	0.000835354	0.0495459
SERPINA5	12.0048	-1.90489	0.421869	-4.51536	6.32106e-06	0.00185292
SERPINF2	27.4552	-1.1411	0.339136	-3.36473	0.000766176	0.047072
SESN2	729.447	1.63662	0.356662	4.58871	4.45995e-06	0.00144645
SH2D1B	24.5215	-1.46504	0.433892	-3.3765	0.00073414	0.046627
SH2D5	128.044	1.19128	0.289158	4.11982	3.79166e-05	0.00589758
SIGLEC15	41.3961	1.49794	0.415817	3.60239	0.000315302	0.0257013
SIRPB1	84.9428	-1.74053	0.372598	-4.67134	2.99235e-06	0.00108601
SLC22A15	218.133	1.29854	0.299332	4.33812	1.43708e-05	0.00322138
SMEK3P	103.589	-4.83952	0.424688	-11.3955	4.40417e-30	6.71328e-26
SNRPB2	3250.09	-1.58365	0.327202	-4.84	1.29841e-06	0.000507478
SP140	697.804	1.2325	0.297863	4.1378	3.50649e-05	0.00562626
SPARC	1729.86	2.12734	0.428001	4.97041	6.68123e-07	0.000377192
SPIRE1	951.157	1.11705	0.271836	4.10928	3.96903e-05	0.00597699
SPNS2	29.212	1.67851	0.416968	4.02552	5.6849e-05	0.00809859
SPOCK1	274.6	-1.43693	0.41653	-3.44978	0.000561051	0.0384583
ST3GAL6	1485.15	1.13383	0.33662	3.36828	0.00075638	0.047072
ST3GAL6-AS1	86.2671	1.0995	0.307635	3.57403	0.000351522	0.0276199
STON2	26.5465	1.37624	0.399182	3.44765	0.000565477	0.0384802
SUN3	147.161	1.41239	0.416181	3.3937	0.000689545	0.0453049
TAPBPL	151.898	-1.17308	0.272373	-4.30688	1.65571e-05	0.00355216
TCF4	193.672	-1.42805	0.416863	-3.4257	0.00061322	0.0413598
TESPA1	47.0208	-3.59208	0.433978	-8.2771	1.26209e-16	4.80951e-13
TGM2	38343.1	-1.64289	0.358814	-4.57867	4.67942e-06	0.00148601
TIE1	171.626	-1.92674	0.39292	-4.90365	9.40706e-07	0.000423455
TM4SF19	40.6529	1.593	0.387552	4.1104	3.94966e-05	0.00597699
TMC8	126.791	1.55562	0.378726	4.1075	3.99956e-05	0.00597699
TMEM144	238.477	1.28762	0.233167	5.5223	3.3459e-08	2.55007e-05
TNFAIP3	585.337	1.62927	0.332093	4.90608	9.29167e-07	0.000423455
TNFSF4	134.795	1.78619	0.433102	4.12417	3.7207e-05	0.0058867
TPPP3	31.5809	2.51559	0.430843	5.83877	5.25869e-09	5.00989e-06
TRIB3	2567.84	1.56336	0.411231	3.80167	0.000143727	0.0153204
TRIML2	140.267	1.07415	0.31849	3.37265	0.000744498	0.0470609
UAP1L1	323.738	1.21887	0.290736	4.19236	2.7607e-05	0.00483693
VSTM1	24.099	-2.58377	0.433899	-5.95477	2.60443e-09	2.7471e-06
ZFP69B	334.732	1.0591	0.182821	5.7931	6.90974e-09	6.1956e-06
ZNF114	1043.09	1.61444	0.305135	5.29091	1.21707e-07	8.43264e-05
ZNF474	18.4641	1.89128	0.433215	4.3657	1.26719e-05	0.00292662

## Sheet: Lung.v.MFP_DEGs.in culture
Official Gene Symbol	baseMean	log2FoldChange	lfcSE	stat	pvalue	padj
BCL11A	72.4245	2.73258	0.323939	8.43549	3.3e-17	2.51e-13
IL2RB	43.6019	2.73153	0.433788	6.29693	3.04e-10	3.31e-07
MUM1L1	63.6339	2.56265	0.380676	6.73185	1.68e-11	2.55e-08
ALDH3A1	68.7075	2.52674	0.363148	6.95788	3.45e-12	7.52e-09
LGR5	287.401	2.35949	0.429473	5.4939	3.93e-08	2.14e-05
MMP9	143.992	2.25771	0.416308	5.42318	5.85e-08	2.97e-05
LINC00184	34.5584	2.14089	0.405834	5.27529	1.33e-07	6.12e-05
NAP1L3	381.421	2.13021	0.359412	5.92693	3.09e-09	2.24e-06
SORL1	178.92	2.08249	0.373096	5.58164	2.38e-08	1.4e-05
LOC339166	90.1886	2.06703	0.3794	5.44815	5.09e-08	2.68e-05
C1orf106	61.7162	2.02704	0.343781	5.89632	3.72e-09	2.5e-06
PLEKHG4	567.581	2.00789	0.288187	6.96734	3.23e-12	7.52e-09
COLEC12	168.666	1.99495	0.434237	4.59416	4.34e-06	0.00118266
OLFML2B	117.368	1.86114	0.358416	5.19268	2.07e-07	8.31e-05
FLJ45974	184.809	1.85615	0.25332	7.32727	2.35e-13	7.16e-10
NRK	237.404	1.83365	0.350686	5.22877	1.71e-07	7.03e-05
LCTL	242.888	1.82985	0.349037	5.24256	1.58e-07	7.03e-05
HTR2C	83.7106	1.81126	0.386072	4.6915	2.71e-06	0.000810597
PLEKHS1	44.5317	1.79663	0.431877	4.16006	3.18e-05	0.00527151
KCNN3	20.7092	1.78191	0.434081	4.10501	4.04e-05	0.00626902
CA8	58.4545	1.77572	0.430448	4.12528	3.7e-05	0.00584054
EFEMP2	195.875	1.77479	0.312138	5.68591	1.3e-08	7.93e-06
TDRP	311	1.76852	0.433935	4.07555	4.59e-05	0.00674583
C16orf54	32.3314	1.73028	0.434491	3.98231	6.82e-05	0.00825662
LOC101927229	592.623	1.70489	0.423636	4.02441	5.71e-05	0.00764173
BTBD19	61.601	1.68965	0.391007	4.32126	1.55e-05	0.00315105
HOXD3	56.0029	1.6805	0.420752	3.99403	6.5e-05	0.00811607
COL6A2	2126.52	1.6578	0.379824	4.36466	1.27e-05	0.00269543
SERPIND1	128.958	1.65376	0.410332	4.03031	5.57e-05	0.00758124
ZNF518B	378.868	1.62851	0.373672	4.35812	1.31e-05	0.00273923
ADPRH	32.9544	1.61747	0.427884	3.78015	0.000156734	0.0150743
ARHGAP20	14.3594	1.59236	0.423767	3.75764	0.000171527	0.0157505
ANXA10	213.663	1.59229	0.420872	3.78332	0.000154749	0.0150244
RNF43	86.6722	1.5667	0.432977	3.61843	0.000296397	0.0234092
EDARADD	94.14	1.55578	0.319844	4.86418	1.15e-06	0.000389312
AHRR	485.033	1.53521	0.246601	6.22546	4.8e-10	4.65e-07
LINC00648	314.49	1.52789	0.413118	3.69843	0.000216936	0.0185773
TMC8	126.791	1.5181	0.378532	4.0105	6.06e-05	0.00789395
HTR1F	658.185	1.48946	0.414716	3.59153	0.000328746	0.0251051
CALHM3	58.5606	1.48799	0.395768	3.75975	0.000170085	0.0157127
EGLN3	325.549	1.45088	0.432624	3.35368	0.000797454	0.044042
PAK6	221.708	1.45007	0.422119	3.4352	0.000592115	0.0369902
ENPP2	63.7194	1.44594	0.432805	3.34085	0.000835208	0.0453063
FGGY	98.0342	1.44515	0.33526	4.31053	1.63e-05	0.00322408
GPR55	18.1091	1.42145	0.405778	3.50302	0.00046002	0.0308351
LINC00645	18.1259	1.41701	0.428525	3.30672	0.000943959	0.0487755
LOXL4	532.349	1.41378	0.329453	4.29129	1.78e-05	0.00333771
NFYC-AS1	50.1628	1.4125	0.351353	4.02018	5.82e-05	0.00764173
AMOT	166.89	1.40756	0.426851	3.29754	0.000975343	0.0498898
PPP1R26-AS1	31.8572	1.4064	0.407971	3.44731	0.000566191	0.0359602
CLU	2280.69	1.40114	0.30315	4.62193	3.8e-06	0.00105368
SLC47A1	207.973	1.38501	0.357268	3.87666	0.0001059	0.0114194
OLFML3	59.8839	1.37416	0.382991	3.58797	0.000333261	0.0251051
AQP1	29.347	1.33245	0.390041	3.41617	0.00063509	0.0382635
CD24	336.414	1.32681	0.39944	3.32167	0.00089479	0.0475237
ZNF813	198.803	1.30473	0.24944	5.23062	1.69e-07	7.03e-05
TIAM1	573.168	1.29947	0.216038	6.01502	1.8e-09	1.37e-06
COL6A1	2190.72	1.29141	0.356019	3.62736	0.000286332	0.0227321
CYFIP2	160.538	1.28025	0.319635	4.00536	6.19e-05	0.00793204
ENTPD3	507.22	1.27889	0.244425	5.23224	1.67e-07	7.03e-05
GALNT3	4370.48	1.27665	0.311361	4.10023	4.13e-05	0.00629128
ARSD	104.293	1.26446	0.362584	3.48734	0.000487851	0.0321918
MR1	252.414	1.26056	0.337376	3.73637	0.000186695	0.01674
TOR1B	789.14	1.2589	0.361427	3.48315	0.000495554	0.0325592
FAM109A	384.243	1.2536	0.329753	3.80165	0.000143737	0.0144144
CXXC5	516.412	1.23977	0.313542	3.95408	7.68e-05	0.00887208
ZNF606	280.681	1.23859	0.28778	4.30395	1.68e-05	0.00322867
CD22	533.521	1.23606	0.355978	3.4723	0.000516025	0.0333295
LOC100287036	237.615	1.23006	0.348977	3.52477	0.000423851	0.028972
CEMIP	496.81	1.22334	0.288705	4.23732	2.26e-05	0.00410482
FSCN1	1029.78	1.19494	0.325224	3.6742	0.000238593	0.0199828
DLC1	2395.46	1.18617	0.303854	3.90374	9.47e-05	0.010616
ADAM8	13757.4	1.18214	0.325446	3.63236	0.000280841	0.0225889
FBF1	198.288	1.17361	0.326082	3.59913	0.000319282	0.0247047
LYPD6	531.021	1.1457	0.281528	4.06957	4.71e-05	0.00677297
TGFBR3	742.826	1.14492	0.246183	4.65069	3.31e-06	0.000933854
RASSF2	310.58	1.13304	0.284161	3.98732	6.68e-05	0.00821461
PDGFD	481.32	1.12599	0.294529	3.82304	0.000131819	0.0135723
NFATC1	263.334	1.12233	0.330543	3.39542	0.000685234	0.0404846
LOC101927482	86.0615	1.10268	0.32899	3.3517	0.000803157	0.0441968
RPS6KC1	1435.18	1.09981	0.319629	3.44088	0.000579824	0.0363715
LEPR	853.268	1.09591	0.275826	3.9732	7.09e-05	0.00844488
GLG1	7509.72	1.0929	0.319917	3.4162	0.00063501	0.0382635
DKFZP434I0714	130.056	1.06199	0.305735	3.47355	0.000513623	0.0333156
ITM2C	3550.42	1.03333	0.231355	4.46643	7.95e-06	0.00202061
SERINC2	2837.12	1.02692	0.273459	3.7553	0.000173135	0.015803
TUBB3	3021.49	1.01086	0.221388	4.56602	4.97e-06	0.00132925
CPNE5	62.6214	-1.03489	0.306475	-3.37676	0.00073346	0.041895
PGPEP1	1032.43	-1.04051	0.297091	-3.50232	0.000461225	0.0308351
TIMM8A	575.833	-1.05991	0.290646	-3.64676	0.000265573	0.0217641
NUPL2	988.549	-1.06477	0.264789	-4.0212	5.79e-05	0.00764173
CARM1	146.466	-1.06567	0.287403	-3.70793	0.000208957	0.0182008
CXorf40A	263.582	-1.0661	0.274184	-3.88828	0.000100957	0.0110711
STARD8	253.729	-1.07855	0.320191	-3.36845	0.000755915	0.0425181
SNX13	1278.2	-1.08446	0.275068	-3.94253	8.06e-05	0.0092406
GLA	1147.19	-1.09582	0.248219	-4.41471	1.01e-05	0.00244719
ARID3A	45.0264	-1.09595	0.294192	-3.72529	0.000195092	0.0171895
SLC25A14	268.304	-1.10548	0.255987	-4.31848	1.57e-05	0.00315105
KHK	400.341	-1.11847	0.317713	-3.52037	0.000430942	0.0293152
AKAP12	911.877	-1.13297	0.328852	-3.44524	0.000570553	0.0360869
IGFBPL1	465.89	-1.13692	0.336072	-3.38296	0.00071709	0.041595
SNX12	115.927	-1.14238	0.290478	-3.93276	8.4e-05	0.00955267
IFITM1	517.03	-1.15895	0.342713	-3.38169	0.000720401	0.041595
HAUS7	900.324	-1.16243	0.351106	-3.31077	0.000930405	0.0484627
C4BPB	695.429	-1.18798	0.304578	-3.90041	9.6e-05	0.0106671
SKIL	612.946	-1.20032	0.33304	-3.60412	0.000313208	0.024468
PLCH1	90.4892	-1.20978	0.351434	-3.44242	0.00057654	0.0363149
MIR614	866.159	-1.21139	0.300438	-4.03207	5.53e-05	0.00758124
GPRC5A	6493.49	-1.21752	0.288334	-4.22259	2.42e-05	0.00433096
RAPGEF3	253.456	-1.22537	0.371251	-3.30065	0.000964619	0.0495074
SHC4	50.4564	-1.22572	0.364283	-3.36475	0.000766129	0.0429342
MTMR8	67.6389	-1.25134	0.350389	-3.57129	0.000355232	0.0261585
CPED1	502.233	-1.25505	0.351874	-3.56676	0.000361426	0.0264867
AP1M2	1211.41	-1.26439	0.268441	-4.71013	2.48e-06	0.000786147
NUAK2	265.971	-1.27956	0.340177	-3.76145	0.000168928	0.0157011
ARHGEF9	284.135	-1.28725	0.363087	-3.54529	0.000392176	0.0276756
PLEKHH2	146.741	-1.29537	0.31806	-4.07272	4.65e-05	0.00674583
MCOLN3	192.103	-1.31773	0.20566	-6.40733	1.48e-10	1.74e-07
KBTBD8	313.087	-1.33391	0.371842	-3.58731	0.000334104	0.0251051
ATP6V0A4	354.047	-1.34303	0.298522	-4.49893	6.83e-06	0.00179489
SFTA1P	586.746	-1.34401	0.386428	-3.47804	0.000505088	0.032902
SERPINF2	27.4552	-1.34604	0.339134	-3.96907	7.22e-05	0.00851456
LINC00702	28.8874	-1.34808	0.339776	-3.96755	7.26e-05	0.00851456
GPR116	6312.34	-1.36759	0.411964	-3.31969	0.000901188	0.0476972
FOXO4	76.468	-1.37226	0.39217	-3.49914	0.000466758	0.0309339
CASC8	176.076	-1.37277	0.39209	-3.50116	0.000463245	0.0308351
EFEMP1	5927.62	-1.37358	0.221352	-6.2054	5.46e-10	4.89e-07
PRKAR1B	618.968	-1.38151	0.389389	-3.5479	0.000388322	0.0275311
PGF	1264.09	-1.38256	0.389313	-3.55129	0.000383348	0.0275311
TMCO2	19.4704	-1.38361	0.415953	-3.32635	0.000879922	0.0472276
DTX3	122.504	-1.40242	0.319293	-4.39227	1.12e-05	0.00258847
MYCT1	39.3329	-1.41528	0.426908	-3.31519	0.000915808	0.0483033
GDF11	39.2799	-1.425	0.374647	-3.80357	0.000142625	0.0143975
FAM122B	252.256	-1.4255	0.373357	-3.81806	0.000134508	0.0136687
SLCO1B3	1135.32	-1.43515	0.326974	-4.38919	1.14e-05	0.00258847
SCG5	70.0932	-1.44362	0.406599	-3.55047	0.000384542	0.0275311
SLC28A3	16.5748	-1.4587	0.434266	-3.35901	0.000782233	0.0436761
C8orf34	12.4653	-1.47521	0.431417	-3.41944	0.000627495	0.0382596
LOC100507547	18.4501	-1.47902	0.390332	-3.78914	0.000151169	0.014771
FMN2	48.1294	-1.4851	0.418495	-3.54868	0.000387173	0.0275311
TGM2	38343.1	-1.48608	0.358811	-4.14168	3.45e-05	0.00559079
ACBD7	147.667	-1.49696	0.365358	-4.09725	4.18e-05	0.0063099
ZFAND2A	689.777	-1.50048	0.254577	-5.89402	3.77e-09	2.5e-06
2019-03-01	47.9415	-1.50748	0.42343	-3.56016	0.000370628	0.027031
GDF9	13.5106	-1.51502	0.420494	-3.60296	0.000314618	0.024468
TTC9	20.9521	-1.51691	0.380373	-3.98796	6.66e-05	0.00821461
SVEP1	13.2282	-1.52213	0.429887	-3.54076	0.000398979	0.0278974
CPA3	25.1815	-1.52504	0.41202	-3.70138	0.00021443	0.0185713
PTPRR	130.329	-1.52581	0.383354	-3.98016	6.89e-05	0.00826578
IL1RL2	16.3525	-1.53656	0.432999	-3.54866	0.000387202	0.0275311
SNRPB2	3250.09	-1.53672	0.327156	-4.69721	2.64e-06	0.000805045
HSD11B1	26.9786	-1.54365	0.422886	-3.65028	0.000261953	0.0217008
ELOVL3	28.1465	-1.546	0.432807	-3.57203	0.000354226	0.0261585
STARD5	18.6839	-1.55797	0.412233	-3.77935	0.00015724	0.0150743
DMKN	44.8829	-1.55857	0.43449	-3.58713	0.000334339	0.0251051
ASTN1	16.7805	-1.5617	0.42078	-3.71144	0.000206081	0.0180534
ALS2CR11	45.9942	-1.58922	0.419011	-3.79277	0.000148974	0.0146504
ROBO2	64.5108	-1.59289	0.41485	-3.83968	0.000123195	0.0128621
INPP5J	54.8125	-1.60038	0.427293	-3.74539	0.000180115	0.0162455
GPR162	26.133	-1.60041	0.41373	-3.86824	0.000109622	0.0115596
ERBB3	114.203	-1.6189	0.327646	-4.941	7.77e-07	0.00028208
LINC01279	41.9623	-1.66454	0.372678	-4.46643	7.95e-06	0.00202061
MYPN	40.1939	-1.67296	0.382518	-4.37356	1.22e-05	0.00266183
RAB3D	100.873	-1.67656	0.378366	-4.43105	9.38e-06	0.00230551
RND1	23.3334	-1.68715	0.41825	-4.03383	5.49e-05	0.00758124
ATP1A3	59.0393	-1.69025	0.411917	-4.10338	4.07e-05	0.00626902
DMBT1	280.915	-1.73778	0.403824	-4.30332	1.68e-05	0.00322867
ARHGAP30	697.094	-1.76014	0.400098	-4.39927	1.09e-05	0.00254709
KIRREL3	144.803	-1.79688	0.42676	-4.21051	2.55e-05	0.00446417
PRSS3	539.225	-1.80617	0.413781	-4.36503	1.27e-05	0.00269543
CARD11	167.651	-1.80705	0.433775	-4.16587	3.1e-05	0.00519541
SERPINA5	12.0048	-1.82773	0.423215	-4.31868	1.57e-05	0.00315105
IL13RA2	116.281	-1.93886	0.416457	-4.65561	3.23e-06	0.000929029
HHIP	129.737	-1.95626	0.333056	-5.87366	4.26e-09	2.71e-06
PLTP	213.601	-1.95761	0.386711	-5.0622	4.14e-07	0.000157934
PSG4	84.0508	-2.01156	0.404933	-4.96765	6.78e-07	0.000251958
PLAC1	56.3365	-2.01275	0.32345	-6.22276	4.88e-10	4.65e-07
IL24	460.844	-2.02168	0.331456	-6.09941	1.06e-09	9.02e-07
LRRC2	71.7092	-2.04068	0.396733	-5.1437	2.69e-07	0.000105284
GLB1L2	11.9733	-2.09919	0.429664	-4.88565	1.03e-06	0.000357138
FAM24B	207.075	-2.19104	0.323356	-6.77591	1.24e-11	2.24e-08
PDE1C	567.659	-2.2538	0.407894	-5.52545	3.29e-08	1.86e-05
VSTM1	24.099	-2.34107	0.43364	-5.39865	6.71e-08	3.22e-05
BCHE	24.408	-2.34187	0.433886	-5.39742	6.76e-08	3.22e-05
RGS7	107.388	-2.39073	0.353336	-6.76615	1.32e-11	2.24e-08
CD33	201.332	-2.44733	0.406199	-6.02497	1.69e-09	1.36e-06
TIE1	171.626	-2.60679	0.393927	-6.61745	3.65e-11	5.06e-08
INHBA	279.166	-2.76398	0.423745	-6.52275	6.9e-11	8.77e-08
PAGE5	135.44	-3.61186	0.434123	-8.3199	8.8e-17	3.35e-13
TESPA1	47.0208	-3.6353	0.434133	-8.37371	5.58e-17	2.84e-13
SMEK3P	103.589	-4.98574	0.424322	-11.7499	7.07e-32	1.08e-27

## Sheet: Brain_IP.v.Lung_IP_DEGs.in vivo
Official Gene Symbol	baseMean	log2FoldChange	lfcSE	stat	pvalue	padj
TPPP3	33.2366	-3.80098	0.505209	-7.52359	5.33e-14	2.83e-12
NR4A1	113.362	-3.67389	0.331429	-11.085	1.48e-28	5.81e-26
SERPINB5	11.2275	-3.53749	0.605407	-5.84316	5.12e-09	1.06e-07
MYO1F	97.2312	-3.44435	0.330796	-10.4123	2.18e-25	5.74e-23
CSPG4	92.265	-3.31213	0.399326	-8.2943	1.09e-16	8.48e-15
ADAMTS15	67.0905	-3.03835	0.418858	-7.25389	4.05e-13	1.8e-11
LOC100505817	135.018	-2.93912	0.429886	-6.83698	8.09e-12	2.92e-10
ROBO2	50.3945	-2.89099	0.404142	-7.15341	8.46e-13	3.6e-11
TMEM52	13.5601	-2.79913	0.588218	-4.75866	1.95e-06	2.19e-05
PSD4	41.5979	-2.73089	0.470467	-5.80463	6.45e-09	1.3e-07
FOSB	185.872	-2.66881	0.267439	-9.97913	1.88e-23	3.92e-21
SIGIRR	68.0254	-2.64959	0.358685	-7.38695	1.5e-13	7.22e-12
NDUFB7	1092.43	-2.64216	0.175779	-15.0311	4.59e-51	2.46e-47
DNAJC27-AS1	58.7056	-2.62023	0.404022	-6.48536	8.85e-11	2.69e-09
SSSCA1	200.601	-2.60177	0.25486	-10.2086	1.81e-24	4.16e-22
NDUFA13	1791.08	-2.58811	0.232577	-11.128	9.17e-29	3.68e-26
C14orf80	244.986	-2.56922	0.222865	-11.5282	9.52e-31	5.66e-28
IRF7	106.563	-2.54266	0.292648	-8.68846	3.67e-18	3.53e-16
EFCAB4A	50.7752	-2.49938	0.35641	-7.01266	2.34e-12	9.18e-11
NTHL1	333.806	-2.46544	0.220129	-11.1999	4.08e-29	1.82e-26
CLIC3	11.8423	-2.45106	0.559799	-4.37847	1.2e-05	0.000109634
SPDEF	84.2572	-2.40401	0.289149	-8.31407	9.25e-17	7.25e-15
ZBTB26	41.7328	-2.3971	0.442676	-5.41503	6.13e-08	9.81e-07
FKBP2	871.327	-2.37436	0.210732	-11.2672	1.91e-29	9.27e-27
BAD	811.634	-2.37036	0.163212	-14.5231	8.65e-48	3.47e-44
CCDC88B	18.8517	-2.36079	0.510704	-4.62262	3.79e-06	3.98e-05
CRIP2	675.272	-2.35736	0.213971	-11.0172	3.16e-28	1.15e-25
ADIRF	234.451	-2.35735	0.316945	-7.43771	1.02e-13	5.06e-12
SNORD104	21.8198	-2.35569	0.498041	-4.72991	2.25e-06	2.49e-05
RPPH1	99.3795	-2.34115	0.394971	-5.92738	3.08e-09	6.7e-08
TNNT1	740.084	-2.32827	0.218888	-10.6368	2.01e-26	5.47e-24
TMEM160	123.97	-2.32562	0.278909	-8.33826	7.54e-17	6.05e-15
DPM3	115.739	-2.31608	0.30407	-7.61692	2.6e-14	1.47e-12
PRX	28.498	-2.31541	0.478057	-4.84338	1.28e-06	1.5e-05
STARD10	113.462	-2.31237	0.342353	-6.75434	1.43e-11	4.96e-10
KRT19	3325.38	-2.31053	0.190693	-12.1165	8.63e-34	7.3e-31
PRR24	49.5189	-2.29507	0.351692	-6.5258	6.76e-11	2.09e-09
RRAD	679.227	-2.28215	0.222877	-10.2395	1.32e-24	3.26e-22
LINC01023	49.7633	-2.28119	0.419615	-5.43639	5.44e-08	8.79e-07
NUDT14	143.054	-2.27153	0.279465	-8.12814	4.36e-16	3.14e-14
S100A4	10847.1	-2.26066	0.16421	-13.7669	4.03e-43	1.08e-39
ZNF628	22.3349	-2.25677	0.506684	-4.454	8.43e-06	8.05e-05
DDAH2	2156.59	-2.24664	0.203288	-11.0515	2.16e-28	8.25e-26
CCDC167	453.561	-2.23964	0.230074	-9.73442	2.15e-22	3.71e-20
MRPL41	911.375	-2.23268	0.200025	-11.162	6.26e-29	2.65e-26
NUDT8	31.9962	-2.22636	0.427191	-5.21163	1.87e-07	2.72e-06
PHPT1	1581.68	-2.22227	0.146478	-15.1714	5.47e-52	4.4e-48
GGT1	19.1737	-2.20981	0.580616	-3.80597	0.000141248	0.000931952
PRRX1	162.682	-2.19892	0.287361	-7.65214	1.98e-14	1.15e-12
FBXL15	165.843	-2.19824	0.277238	-7.92905	2.21e-15	1.43e-13
ZBTB17	146.38	-2.19598	0.344391	-6.37641	1.81e-10	5.09e-09
ARL6IP4	915.075	-2.19038	0.199387	-10.9856	4.48e-28	1.57e-25
RIN1	174.087	-2.18667	0.279208	-7.83168	4.81e-15	3.03e-13
TCEA3	418.55	-2.18264	0.21586	-10.1114	4.92e-24	1.08e-21
IFI27L2	246.312	-2.18113	0.274515	-7.94538	1.94e-15	1.27e-13
ROMO1	2321.61	-2.17229	0.252807	-8.59266	8.5e-18	7.67e-16
B3GALT4	57.4958	-2.15068	0.347982	-6.18043	6.39e-10	1.6e-08
RFNG	117.344	-2.1306	0.285091	-7.47341	7.81e-14	4.01e-12
ZNHIT2	114.696	-2.1255	0.314095	-6.76706	1.31e-11	4.57e-10
CAMKK1	197.624	-2.1102	0.257504	-8.19484	2.51e-16	1.87e-14
NGEF	70.8747	-2.10799	0.360642	-5.8451	5.06e-09	1.05e-07
LRRC26	11.5621	-2.10381	0.566103	-3.71631	0.000202156	0.00127235
B3GNT8	56.7557	-2.10173	0.474331	-4.43093	9.38e-06	8.86e-05
COMTD1	22.1163	-2.09959	0.477776	-4.3945	1.11e-05	0.000102607
ANGPTL4	89.2039	-2.0878	0.329819	-6.33015	2.45e-10	6.69e-09
HRAS	774.909	-2.08755	0.221817	-9.41115	4.91e-21	6.46e-19
NFKBIL1	150.511	-2.08159	0.285057	-7.30237	2.83e-13	1.3e-11
PNKD	1581.69	-2.08102	0.163686	-12.7134	4.98e-37	6.66e-34
NDUFB11	1264.35	-2.07811	0.183094	-11.35	7.42e-30	3.97e-27
PDK4	146.209	-2.07032	0.326237	-6.34604	2.21e-10	6.1e-09
SPSB2	161.831	-2.06305	0.239094	-8.6286	6.21e-18	5.7e-16
TIPARP-AS1	23.3813	-2.06113	0.506353	-4.07055	4.69e-05	0.000360107
PKP3	53.9463	-2.05788	0.362904	-5.6706	1.42e-08	2.67e-07
LOC729041	28.9697	-2.05471	0.480804	-4.27349	1.92e-05	0.000164848
EGR4	10.1176	-2.05414	0.578655	-3.54985	0.000385452	0.00217614
CD70	240.502	-2.05103	0.493956	-4.15226	3.29e-05	0.000265051
TPPP	21.0195	-2.04778	0.515006	-3.97622	7e-05	0.000507058
NT5C	673.737	-2.04735	0.215907	-9.48258	2.48e-21	3.46e-19
TAF13	150.762	-2.04696	0.332347	-6.1591	7.32e-10	1.79e-08
C16orf13	314.146	-2.03907	0.17642	-11.558	6.72e-31	4.15e-28
RPL36AL	14334.9	-2.03778	0.2216	-9.19573	3.72e-20	4.4e-18
MED16	133.678	-2.0325	0.27812	-7.30801	2.71e-13	1.25e-11
NAA38	1458.38	-2.02139	0.202794	-9.96773	2.11e-23	4.34e-21
PCOLCE	54.7895	-2.01031	0.364825	-5.51034	3.58e-08	6.07e-07
C9orf142	279.136	-1.99636	0.199531	-10.0052	1.45e-23	3.06e-21
GADD45GIP1	1212.8	-1.99326	0.161243	-12.3619	4.2e-35	4.5e-32
CCDC28B	374.376	-1.99058	0.201493	-9.87915	5.13e-23	1e-20
BOK	269.706	-1.98703	0.212228	-9.36272	7.77e-21	9.91e-19
RECQL4	300.568	-1.987	0.172877	-11.4937	1.42e-30	8.14e-28
ID2	52.8898	-1.98142	0.365804	-5.41662	6.07e-08	9.75e-07
ZG16B	72.157	-1.97781	0.356246	-5.5518	2.83e-08	4.91e-07
LOC339874	52.5276	-1.9778	0.375431	-5.26807	1.38e-07	2.05e-06
CREB3L1	432.396	-1.9746	0.191959	-10.2866	8.1e-25	2.06e-22
TSR3	320.856	-1.97082	0.278921	-7.06586	1.6e-12	6.51e-11
ZNF593	394.706	-1.97055	0.203708	-9.6734	3.91e-22	6.61e-20
FLVCR2	149.465	-1.96817	0.232742	-8.45645	2.76e-17	2.37e-15
C11orf83	601.832	-1.96652	0.178482	-11.0181	3.13e-28	1.15e-25
DRAP1	1292.48	-1.96613	0.162609	-12.0911	1.18e-33	9.45e-31
FIBCD1	31.6548	-1.96583	0.399585	-4.91969	8.67e-07	1.07e-05
FAM179A	72.2083	-1.96234	0.338151	-5.80316	6.51e-09	1.31e-07
POLR2L	1450.52	-1.9603	0.182565	-10.7375	6.78e-27	1.95e-24
UBXN1	1319.1	-1.95846	0.198976	-9.84273	7.37e-23	1.43e-20
HAGHL	16.6632	-1.95461	0.518481	-3.76987	0.00016333	0.00105911
MVP	647.542	-1.95249	0.178368	-10.9464	6.91e-28	2.27e-25
CDT1	414.52	-1.95079	0.192479	-10.1351	3.86e-24	8.73e-22
KLF2	818.391	-1.94932	0.17969	-10.8483	2.03e-27	6.4e-25
LGALS1	7553.48	-1.94774	0.14566	-13.3718	8.84e-41	2.03e-37
LAMTOR4	625.274	-1.94722	0.205666	-9.46785	2.86e-21	3.96e-19
LINC01272	11.349	-1.94023	0.566599	-3.42435	0.000616275	0.00323378
PWWP2B	84.3184	-1.92736	0.304862	-6.32208	2.58e-10	6.99e-09
TFEB	24.9791	-1.92141	0.502399	-3.82448	0.000131051	0.000873418
AURKAIP1	1762.3	-1.91811	0.144162	-13.3052	2.16e-40	3.85e-37
WNT10B	17.267	-1.91801	0.529304	-3.62364	0.000290483	0.00172231
KRT15	67.916	-1.91591	0.359704	-5.32634	1e-07	1.54e-06
SFN	515.298	-1.91216	0.207556	-9.21278	3.18e-20	3.79e-18
PC	225.861	-1.90872	0.255708	-7.46447	8.36e-14	4.24e-12
LOC100505622	59.3588	-1.90856	0.384609	-4.96234	6.96e-07	8.82e-06
C1orf122	286.063	-1.90753	0.233802	-8.15875	3.39e-16	2.45e-14
NDUFS8	1654.77	-1.90547	0.132426	-14.3889	6.08e-47	1.95e-43
TIMM13	1714.68	-1.90523	0.17368	-10.9698	5.34e-28	1.83e-25
ENTPD3-AS1	628.388	-1.89961	0.255175	-7.44435	9.74e-14	4.86e-12
SELENBP1	56.9569	-1.89145	0.360396	-5.24824	1.54e-07	2.27e-06
COX7A2	9638.46	-1.88856	0.168873	-11.1833	4.92e-29	2.14e-26
C16orf59	129.851	-1.88709	0.28596	-6.59913	4.14e-11	1.32e-09
SART1	250.969	-1.88302	0.24113	-7.80914	5.76e-15	3.56e-13
DGUOK-AS1	39.2321	-1.87848	0.366552	-5.12473	2.98e-07	4.14e-06
HSD17B8	102.419	-1.86308	0.279715	-6.66064	2.73e-11	8.99e-10
SEMA3B	93.0368	-1.86302	0.298839	-6.2342	4.54e-10	1.17e-08
LOC641746	13.7706	-1.86045	0.568584	-3.27208	0.00106759	0.00517603
RPL36	2493.16	-1.8579	0.171695	-10.821	2.74e-27	8.15e-25
DDRGK1	317.452	-1.85428	0.261107	-7.1016	1.23e-12	5.1e-11
C8orf82	143.782	-1.85048	0.250268	-7.39399	1.42e-13	6.91e-12
RILP	74.1345	-1.84968	0.330463	-5.59724	2.18e-08	3.87e-07
RPL35	3380.31	-1.84389	0.188296	-9.79249	1.21e-22	2.14e-20
EHBP1L1	175.85	-1.83755	0.303989	-6.04479	1.5e-09	3.46e-08
CD320	572.94	-1.83478	0.187126	-9.80506	1.07e-22	1.91e-20
EIF4EBP1	1464.48	-1.83288	0.184265	-9.94699	2.6e-23	5.15e-21
WNT4	39.9251	-1.83265	0.468759	-3.90957	9.25e-05	0.000645977
SSNA1	613.978	-1.82731	0.19339	-9.44887	3.43e-21	4.58e-19
CHCHD5	362.624	-1.82707	0.189471	-9.64302	5.26e-22	8.71e-20
BRMS1	467.06	-1.81867	0.213454	-8.52021	1.59e-17	1.39e-15
PLEC	2670.95	-1.81846	0.137145	-13.2594	3.98e-40	6.39e-37
NME3	245.023	-1.81292	0.227722	-7.96109	1.71e-15	1.12e-13
PITPNM1	55.0472	-1.80934	0.426966	-4.23766	2.26e-05	0.000189642
GADD45G	16.686	-1.80909	0.523818	-3.45367	0.000553017	0.00295199
PET100	2056.03	-1.8089	0.271459	-6.66361	2.67e-11	8.83e-10
PITX1	829.568	-1.80442	0.151523	-11.9086	1.07e-32	8.16e-30
RASD1	39.6287	-1.80385	0.400814	-4.50047	6.78e-06	6.66e-05
NPDC1	83.1696	-1.79977	0.293514	-6.13181	8.69e-10	2.1e-08
PMM1	371.506	-1.79901	0.174614	-10.3027	6.85e-25	1.77e-22
SELM	113.567	-1.7981	0.285056	-6.30788	2.83e-10	7.59e-09
TSSC4	240.44	-1.79573	0.273443	-6.56709	5.13e-11	1.61e-09
AK1	799.934	-1.79514	0.144474	-12.4253	1.9e-35	2.18e-32
SH3BGRL3	20402.5	-1.79361	0.187576	-9.56205	1.15e-21	1.73e-19
C17orf89	675.101	-1.7933	0.236622	-7.57877	3.49e-14	1.91e-12
SCAND1	761.027	-1.79105	0.153878	-11.6394	2.6e-31	1.81e-28
LRRC75B	39.8768	-1.7887	0.462323	-3.86893	0.000109313	0.000749059
SLC45A1	18.9547	-1.78541	0.49463	-3.60959	0.000306676	0.00179775
MRPL23	207.25	-1.77563	0.219728	-8.08103	6.42e-16	4.52e-14
TMSB10	29595.1	-1.77462	0.204831	-8.6638	4.56e-18	4.26e-16
PLD5	28.6408	-1.77085	0.523332	-3.38379	0.000714918	0.00365468
CHCHD10	31.4101	-1.76858	0.412677	-4.28563	1.82e-05	0.000157019
PTK2B	32.9589	-1.76506	0.519948	-3.39468	0.000687098	0.00354064
COX6C	10404.9	-1.76348	0.218949	-8.05431	7.99e-16	5.58e-14
LMNA	4357.72	-1.76015	0.213091	-8.26007	1.46e-16	1.11e-14
IGFBP6	268.96	-1.75497	0.252314	-6.95549	3.51e-12	1.32e-10
ANO7	27.1328	-1.75317	0.456344	-3.84178	0.000122147	0.000823995
ARAP1	436.084	-1.75085	0.242184	-7.2294	4.85e-13	2.13e-11
GLTSCR2	236.809	-1.74647	0.239966	-7.278	3.39e-13	1.52e-11
FAM173A	69.45	-1.73663	0.357463	-4.85822	1.18e-06	1.41e-05
LOC100862671	611.116	-1.73607	0.176817	-9.81846	9.38e-23	1.75e-20
E2F2	395.9	-1.73545	0.271901	-6.38266	1.74e-10	4.9e-09
LOC113230	103.627	-1.7323	0.60903	-2.84436	0.00445005	0.0172316
CTU1	83.8288	-1.73002	0.310973	-5.56326	2.65e-08	4.63e-07
PAX9	13.1052	-1.7284	0.593576	-2.91184	0.00359306	0.0143848
CIART	180.484	-1.72827	0.297957	-5.80041	6.62e-09	1.33e-07
CD14	17.0704	-1.72557	0.555843	-3.10442	0.00190654	0.00850162
GPAT2	218.086	-1.72534	0.216376	-7.97382	1.54e-15	1.03e-13
APBB1	125.122	-1.7251	0.304673	-5.66214	1.49e-08	2.79e-07
GSDMD	505.063	-1.72399	0.210308	-8.19746	2.46e-16	1.83e-14
LBX2-AS1	43.9657	-1.72124	0.366194	-4.70035	2.6e-06	2.84e-05
RNPEPL1	61.8367	-1.72091	0.351647	-4.89385	9.89e-07	1.2e-05
FOS	447.319	-1.71943	0.167451	-10.2683	9.79e-25	2.46e-22
OSBPL7	114.474	-1.71332	0.266765	-6.42257	1.34e-10	3.89e-09
MYL9	145.545	-1.71242	0.284112	-6.02726	1.67e-09	3.79e-08
VEGFB	344.129	-1.71151	0.179781	-9.51998	1.73e-21	2.51e-19
RARG	207.434	-1.70961	0.266718	-6.40981	1.46e-10	4.2e-09
LINC00639	21.2256	-1.70881	0.534713	-3.19575	0.00139467	0.00650255
DNLZ	227.759	-1.70818	0.195992	-8.71556	2.89e-18	2.87e-16
CAPG	2857.17	-1.70433	0.233366	-7.30328	2.81e-13	1.29e-11
ALKBH7	168.074	-1.70376	0.231012	-7.3752	1.64e-13	7.84e-12
MRPL53	1253.77	-1.7015	0.208378	-8.16544	3.2e-16	2.34e-14
TRPM3	17.155	-1.69279	0.606458	-2.79127	0.0052502	0.019809
HCFC1R1	327.823	-1.69052	0.19197	-8.80615	1.3e-18	1.36e-16
BOP1	355.83	-1.68932	0.281344	-6.00446	1.92e-09	4.34e-08
C19orf24	244.452	-1.68646	0.183532	-9.18888	3.97e-20	4.59e-18
A1BG	53.4369	-1.686	0.406921	-4.1433	3.42e-05	0.000274388
LOC100127888	337.964	-1.68309	0.212315	-7.92735	2.24e-15	1.44e-13
HIST1H2BB	30.3516	-1.68259	0.438618	-3.83611	0.000124997	0.000839694
DXO	310.146	-1.67569	0.223304	-7.50406	6.19e-14	3.24e-12
SCRIB	345.113	-1.67541	0.26182	-6.39909	1.56e-10	4.48e-09
MAP1S	195.349	-1.67538	0.262927	-6.37205	1.87e-10	5.21e-09
CNPY3	1625.65	-1.67346	0.182029	-9.19338	3.81e-20	4.43e-18
PLCL2	189.812	-1.67248	0.251778	-6.64269	3.08e-11	1e-09
BOK-AS1	18.0652	-1.67112	0.558003	-2.99482	0.00274607	0.0115253
PEX14	218.72	-1.67108	0.276831	-6.03648	1.58e-09	3.61e-08
CCDC107	18.1607	-1.67045	0.506461	-3.29828	0.000972786	0.00478118
RPLP2	2808.66	-1.66585	0.228414	-7.29315	3.03e-13	1.38e-11
PCDHGB3	13.4414	-1.66096	0.565214	-2.93864	0.00329652	0.0133912
RNF128	117.846	-1.6603	0.284623	-5.83331	5.43e-09	1.12e-07
ARFRP1	514.779	-1.65959	0.237937	-6.97491	3.06e-12	1.18e-10
CFB	68.0306	-1.65804	0.396439	-4.18234	2.89e-05	0.000235721
LOC645166	1095.39	-1.65496	0.166221	-9.95638	2.37e-23	4.81e-21
SHFM1	6224.73	-1.64945	0.242913	-6.79029	1.12e-11	3.94e-10
SIX5	74.9421	-1.64345	0.374094	-4.39314	1.12e-05	0.000103074
ANKRD9	125.545	-1.64304	0.356057	-4.61453	3.94e-06	4.12e-05
C4orf48	44.7375	-1.64269	0.383799	-4.28007	1.87e-05	0.000160477
CP	15.6125	-1.642	0.603935	-2.71884	0.00655109	0.0237564
NEAT1	2217.53	-1.64107	0.2106	-7.79235	6.58e-15	4.05e-13
MRPL54	496.127	-1.64078	0.204664	-8.01695	1.08e-15	7.38e-14
RPS15	3292.13	-1.63801	0.167738	-9.76527	1.59e-22	2.77e-20
C1orf110	24.3623	-1.63762	0.517535	-3.16427	0.0015547	0.00714699
ARTN	117.717	-1.63277	0.308204	-5.29768	1.17e-07	1.77e-06
LOC100289361	17.4145	-1.62901	0.538219	-3.02666	0.00247268	0.0105485
CPT1A	246.906	-1.62837	0.274511	-5.93189	2.99e-09	6.56e-08
FDX1L	607.396	-1.62795	0.181373	-8.9757	2.82e-19	3.1e-17
RASSF7	83.7496	-1.62591	0.290709	-5.5929	2.23e-08	3.96e-07
HS1BP3	58.0886	-1.62505	0.384738	-4.22378	2.4e-05	0.00020056
LIN37	116.359	-1.62456	0.29473	-5.51203	3.55e-08	6.02e-07
ATP5I	1231.43	-1.62381	0.397421	-4.08586	4.39e-05	0.000340739
PTRH1	128.151	-1.62219	0.252432	-6.42624	1.31e-10	3.81e-09
COPE	1007.37	-1.62156	0.198735	-8.15942	3.37e-16	2.45e-14
NAT14	213.068	-1.62144	0.241743	-6.7073	1.98e-11	6.66e-10
CCDC85B	345.108	-1.62117	0.224994	-7.20542	5.79e-13	2.53e-11
LSM7	1276.99	-1.61987	0.18345	-8.83	1.05e-18	1.11e-16
SEMA4G	20.589	-1.61853	0.533338	-3.03472	0.00240757	0.0103259
STX10	920.973	-1.61787	0.220807	-7.32708	2.35e-13	1.1e-11
TTC9	74.3505	-1.61539	0.353503	-4.56966	4.89e-06	5.01e-05
SNCG	46.1802	-1.61429	0.364259	-4.4317	9.35e-06	8.83e-05
OGFOD2	380.713	-1.61398	0.247788	-6.51356	7.34e-11	2.25e-09
SPSB3	376.142	-1.61269	0.19649	-8.2075	2.26e-16	1.7e-14
MRPL12	369.905	-1.60953	0.221445	-7.26832	3.64e-13	1.63e-11
DNAJB2	173.644	-1.60854	0.333425	-4.82428	1.41e-06	1.64e-05
CYBA	495.959	-1.60761	0.167399	-9.60345	7.73e-22	1.23e-19
SREBF1	831.148	-1.60752	0.191998	-8.37258	5.64e-17	4.64e-15
ENKD1	59.1744	-1.60689	0.404789	-3.9697	7.2e-05	0.000519498
ZNF736	58.9925	-1.60629	0.358138	-4.48512	7.29e-06	7.08e-05
C1orf35	713.972	-1.60626	0.196581	-8.17099	3.06e-16	2.25e-14
NDST2	152.28	-1.60317	0.292707	-5.47706	4.32e-08	7.17e-07
CHI3L2	18.2976	-1.59666	0.580598	-2.75002	0.00595916	0.0219381
BCL7C	94.3244	-1.59515	0.289855	-5.50327	3.73e-08	6.28e-07
HIST1H2AH	20.3075	-1.59384	0.531324	-2.99975	0.00270199	0.011379
TRAPPC5	285.858	-1.59374	0.182086	-8.75265	2.08e-18	2.11e-16
CHMP6	134.984	-1.593	0.360179	-4.4228	9.74e-06	9.14e-05
KLF3	1508.38	-1.59298	0.16986	-9.37817	6.71e-21	8.63e-19
KIFC2	13.5121	-1.59199	0.592278	-2.68791	0.00719009	0.025624
MAP7D1	1663.47	-1.59121	0.181403	-8.77169	1.76e-18	1.81e-16
HCLS1	27.177	-1.59109	0.507764	-3.13352	0.00172725	0.00779738
RBM10	245.4	-1.5904	0.233927	-6.79869	1.06e-11	3.73e-10
ROBO3	153.809	-1.58928	0.245478	-6.47421	9.53e-11	2.87e-09
NDUFA1	4558.52	-1.58728	0.208353	-7.61822	2.57e-14	1.46e-12
LOC654342	3078.82	-1.58713	0.149859	-10.5908	3.29e-26	8.8e-24
AHNAK2	979.912	-1.5864	0.167073	-9.49525	2.2e-21	3.1e-19
CDKN1C	736.741	-1.58447	0.16473	-9.61858	6.67e-22	1.08e-19
GPSM3	317.978	-1.58275	0.190941	-8.28918	1.14e-16	8.81e-15
LY6G5C	119.258	-1.58273	0.249215	-6.35086	2.14e-10	5.94e-09
RHOD	38.6294	-1.58048	0.408721	-3.86689	0.000110231	0.000754383
EGFL7	29.276	-1.57618	0.482323	-3.2679	0.00108349	0.00523239
LTB	32.6405	-1.57591	0.542796	-2.90332	0.00369232	0.0147436
KLF4	1297.31	-1.57591	0.160282	-9.83206	8.19e-23	1.57e-20
PCDHGA10	48.6135	-1.57244	0.460477	-3.41482	0.000638252	0.00333169
PRSS3	865.411	-1.5692	0.210704	-7.44738	9.52e-14	4.76e-12
NDUFS7	434.963	-1.56828	0.182989	-8.5704	1.03e-17	9.1e-16
PRDX5	2555.57	-1.5674	0.157523	-9.95028	2.51e-23	5.05e-21
RPL11	2602.1	-1.56661	0.197944	-7.9144	2.48e-15	1.6e-13
RPL13	3406.45	-1.56635	0.154572	-10.1335	3.93e-24	8.76e-22
SNHG8	1695.04	-1.5636	0.205667	-7.60257	2.9e-14	1.62e-12
GNA15	182.157	-1.56347	0.290553	-5.38102	7.41e-08	1.17e-06
NUDT22	344.029	-1.5634	0.219719	-7.11548	1.12e-12	4.65e-11
EEPD1	21.4688	-1.56136	0.497582	-3.13789	0.00170169	0.0076993
ACPT	10.4412	-1.55967	0.57221	-2.7257	0.00641651	0.0233383
AAMDC	596.075	-1.55853	0.184429	-8.45057	2.9e-17	2.46e-15
RPL38	10542.4	-1.55565	0.245531	-6.33587	2.36e-10	6.48e-09
NDUFA3	630.092	-1.54756	0.21896	-7.06777	1.57e-12	6.43e-11
MEA1	2132.38	-1.54753	0.178086	-8.68976	3.63e-18	3.51e-16
FBXW5	260.751	-1.54643	0.240469	-6.43087	1.27e-10	3.71e-09
CHMP4A	648.234	-1.54474	0.172424	-8.95895	3.28e-19	3.56e-17
SLC25A53	80.5651	-1.54223	0.339397	-4.54401	5.52e-06	5.57e-05
MRPS18C	1195.94	-1.5417	0.225487	-6.8372	8.08e-12	2.92e-10
FLJ20021	28.8435	-1.54169	0.49339	-3.12469	0.00177991	0.0080036
POLR2I	2354.32	-1.53932	0.182094	-8.45344	2.83e-17	2.42e-15
NUDT1	476.561	-1.5391	0.197953	-7.77508	7.54e-15	4.58e-13
SLC39A4	614.21	-1.5378	0.164364	-9.35608	8.28e-21	1.05e-18
EDF1	967.597	-1.53502	0.173709	-8.83676	9.85e-19	1.06e-16
UBXN6	258.526	-1.53384	0.267343	-5.73736	9.62e-09	1.87e-07
CSTF3-AS1	194.234	-1.53215	0.264049	-5.8025	6.53e-09	1.32e-07
HIST1H4B	17.8908	-1.52788	0.527841	-2.89459	0.00379652	0.0150903
CKB	844.779	-1.52742	0.1816	-8.4109	4.07e-17	3.4e-15
PIDD1	86.098	-1.52697	0.314439	-4.85617	1.2e-06	1.42e-05
RPS18	13796.1	-1.52644	0.158984	-9.60124	7.9e-22	1.24e-19
LOC100499489	31.9275	-1.52469	0.435761	-3.49892	0.000467146	0.00256089
APRT	314.508	-1.52388	0.206664	-7.3737	1.66e-13	7.91e-12
AQP1	66.4136	-1.52254	0.433346	-3.51346	0.00044231	0.00244137
COX14	1852.6	-1.52165	0.19085	-7.97304	1.55e-15	1.03e-13
TMEM143	38.9	-1.51988	0.376026	-4.04195	5.3e-05	0.000400098
RPS19BP1	1217.76	-1.51976	0.140272	-10.8343	2.37e-27	7.17e-25
RPS26	3636.18	-1.51965	0.224465	-6.77011	1.29e-11	4.5e-10
EPS8L2	112.35	-1.51919	0.269095	-5.64556	1.65e-08	3.04e-07
DOHH	122.362	-1.51739	0.280161	-5.41616	6.09e-08	9.76e-07
E4F1	76.9404	-1.5169	0.32648	-4.64624	3.38e-06	3.58e-05
RGAG4	20.7522	-1.51585	0.530807	-2.85575	0.00429353	0.0167182
IFI27L1	300.743	-1.51521	0.216002	-7.01481	2.3e-12	9.06e-11
KIF13B	490.326	-1.51358	0.195929	-7.72511	1.12e-14	6.62e-13
TPM2	70.6993	-1.51349	0.304304	-4.97361	6.57e-07	8.36e-06
DVL1	435.865	-1.51157	0.22712	-6.65538	2.83e-11	9.3e-10
CCDC12	3620.07	-1.50918	0.187473	-8.05009	8.27e-16	5.73e-14
USP35	34.9996	-1.50873	0.448354	-3.36505	0.000765305	0.00386673
TBC1D10A	209.217	-1.50775	0.217596	-6.92911	4.24e-12	1.58e-10
LOC102723320	26.8575	-1.50715	0.469261	-3.21175	0.0013193	0.00619969
ADAT3	32.3314	-1.50552	0.42673	-3.52804	0.000418643	0.00233319
VSTM2L	21.8924	-1.5044	0.449738	-3.34506	0.000822662	0.00411413
SPACA6P	56.8537	-1.50334	0.384697	-3.90786	9.31e-05	0.000650007
TELO2	103.27	-1.50173	0.303545	-4.94731	7.52e-07	9.46e-06
MOB2	188.546	-1.50086	0.254419	-5.89916	3.65e-09	7.82e-08
RNASEH2C	303.369	-1.50002	0.257261	-5.83074	5.52e-09	1.13e-07
PLEKHH3	90.9597	-1.49889	0.323218	-4.63741	3.53e-06	3.73e-05
ZNF467	14.1031	-1.49838	0.612868	-2.44486	0.0144908	0.0455394
TP53I13	601.924	-1.49822	0.214353	-6.9895	2.76e-12	1.08e-10
UBL5	5713.61	-1.49804	0.215329	-6.95697	3.48e-12	1.31e-10
VAMP8	9024.04	-1.49784	0.155596	-9.62647	6.18e-22	1.01e-19
FAM195B	300.999	-1.49689	0.242446	-6.17411	6.65e-10	1.66e-08
MT1F	110.814	-1.49656	0.299421	-4.9982	5.79e-07	7.47e-06
HIST1H3C	25.385	-1.49642	0.472125	-3.16955	0.00152677	0.00702864
CTSD	2799.59	-1.49639	0.272238	-5.49662	3.87e-08	6.49e-07
RPL13A	2833.8	-1.49421	0.224893	-6.64407	3.05e-11	9.96e-10
HDAC5	326.462	-1.49335	0.166346	-8.9774	2.77e-19	3.07e-17
AHNAK	5376.13	-1.48949	0.199581	-7.46309	8.45e-14	4.26e-12
LOC150381	712.554	-1.48827	0.220999	-6.73427	1.65e-11	5.58e-10
ATP5E	41.8569	-1.48349	0.384745	-3.85578	0.000115362	0.000783487
C19orf70	888.535	-1.48152	0.203232	-7.28979	3.1e-13	1.4e-11
SBF1	118.437	-1.48131	0.277175	-5.34432	9.08e-08	1.41e-06
SETD1A	358.16	-1.47998	0.243692	-6.07316	1.25e-09	2.94e-08
LOC100289230	123.778	-1.47889	0.265017	-5.58036	2.4e-08	4.24e-07
AOC3	14.7364	-1.47781	0.531492	-2.7805	0.00542759	0.0203401
MZT2B	104.876	-1.47774	0.30144	-4.90226	9.47e-07	1.16e-05
GUCA1B	150.644	-1.47506	0.290468	-5.07821	3.81e-07	5.16e-06
VPS16	78.5589	-1.47443	0.375618	-3.92534	8.66e-05	0.000610668
LRFN4	70.0279	-1.47412	0.324075	-4.5487	5.4e-06	5.47e-05
CLUH	224.468	-1.47292	0.309561	-4.75811	1.95e-06	2.2e-05
GAL	10.1484	-1.47159	0.562704	-2.61521	0.00891728	0.0304938
POLD4	299.601	-1.46949	0.18862	-7.79076	6.66e-15	4.08e-13
ZNF668	78.9019	-1.46907	0.309647	-4.74435	2.09e-06	2.34e-05
MTMR9LP	69.313	-1.46864	0.394137	-3.72621	0.000194381	0.00123113
TCIRG1	320.495	-1.46685	0.24314	-6.03294	1.61e-09	3.68e-08
CCDC101	114.234	-1.46647	0.238829	-6.14025	8.24e-10	2.01e-08
AMDHD2	53.0428	-1.46563	0.399634	-3.66743	0.000244997	0.00149228
PTPRN2	82.1194	-1.46369	0.39613	-3.69498	0.000219903	0.00136743
KLF16	125.25	-1.46325	0.312031	-4.68942	2.74e-06	2.98e-05
NMRAL1	211.313	-1.45822	0.256191	-5.69192	1.26e-08	2.39e-07
AIP	1300.44	-1.45764	0.176551	-8.25616	1.5e-16	1.15e-14
LIME1	91.9326	-1.45484	0.2814	-5.17001	2.34e-07	3.32e-06
FLNC	104.084	-1.44977	0.304897	-4.75494	1.99e-06	2.23e-05
LINC01311	13.0171	-1.44929	0.548191	-2.64377	0.00819873	0.0285286
HIST1H3B	54.6043	-1.4475	0.34544	-4.1903	2.79e-05	0.00022841
TCEB2	1102.64	-1.44661	0.158019	-9.15466	5.45e-20	6.26e-18
DCDC2B	27.4541	-1.44637	0.475715	-3.04041	0.00236258	0.0101791
TMEM256	257.925	-1.44604	0.255038	-5.66991	1.43e-08	2.67e-07
TRIM7	51.0068	-1.44582	0.36326	-3.98014	6.89e-05	0.000500343
RPL10A	3917.13	-1.44403	0.150861	-9.57194	1.05e-21	1.59e-19
UBALD2	966.757	-1.43743	0.256055	-5.61377	1.98e-08	3.58e-07
RBM5-AS1	38.7285	-1.43585	0.410254	-3.49991	0.000465412	0.00255658
HSPB1	2289.52	-1.43555	0.146236	-9.81662	9.55e-23	1.76e-20
RPL37A	7371.97	-1.43483	0.387527	-3.70252	0.000213465	0.00133308
RXRA	434.952	-1.43333	0.244497	-5.86235	4.56e-09	9.59e-08
CDSN	16.8087	-1.43238	0.52628	-2.72171	0.00649461	0.023585
OXLD1	99.6565	-1.43007	0.300073	-4.76573	1.88e-06	2.13e-05
NCAPH2	302.606	-1.42888	0.239228	-5.97287	2.33e-09	5.18e-08
KRI1	684.662	-1.42799	0.223413	-6.39172	1.64e-10	4.66e-09
PUF60	2326.89	-1.42652	0.189618	-7.52317	5.35e-14	2.83e-12
SCAF1	104.023	-1.42635	0.261425	-5.45606	4.87e-08	8e-07
SVIP	1697.67	-1.42606	0.193864	-7.356	1.89e-13	8.95e-12
RTN4RL2	24.1002	-1.42215	0.455379	-3.123	0.00179018	0.0080408
ZFAND2B	708.004	-1.42059	0.20716	-6.85748	7.01e-12	2.55e-10
C6orf226	523.888	-1.41944	0.162614	-8.72891	2.57e-18	2.57e-16
CD97	4117.49	-1.4181	0.202671	-6.99707	2.61e-12	1.02e-10
TNFRSF11A	111.194	-1.41765	0.334756	-4.23487	2.29e-05	0.00019181
FIS1	1264.61	-1.41745	0.148304	-9.55774	1.2e-21	1.79e-19
NDOR1	243.718	-1.41724	0.227472	-6.2304	4.65e-10	1.2e-08
MFSD3	117.368	-1.41573	0.386105	-3.66669	0.000245709	0.00149492
NFATC1	59.2287	-1.41564	0.353158	-4.00852	6.11e-05	0.000450795
ZNF778	50.7543	-1.41552	0.371161	-3.81378	0.000136858	0.000905736
TTC39A	15.9737	-1.4151	0.558682	-2.53292	0.0113116	0.0371851
PRPF31	836.033	-1.41502	0.226327	-6.25211	4.05e-10	1.05e-08
KHDC1L	22.1864	-1.414	0.460737	-3.069	0.0021478	0.00938974
RAB30-AS1	610.763	-1.41144	0.211791	-6.66427	2.66e-11	8.83e-10
FSIP2	304.248	-1.41116	0.200125	-7.05141	1.77e-12	7.13e-11
MAP7	11.7512	-1.41045	0.571855	-2.46645	0.013646	0.0432652
RRBP1	738.779	-1.41018	0.185989	-7.58208	3.4e-14	1.87e-12
SURF6	364.346	-1.4097	0.217942	-6.46824	9.92e-11	2.97e-09
TRAF1	294.838	-1.40956	0.168246	-8.37795	5.39e-17	4.46e-15
STRA13	1208.53	-1.40919	0.143621	-9.81185	1e-22	1.83e-20
ROM1	15.1516	-1.40846	0.529256	-2.66122	0.00778587	0.0273323
ICOSLG	30.0887	-1.40782	0.431907	-3.25956	0.00111586	0.00536617
PUSL1	162.653	-1.40773	0.222428	-6.32892	2.47e-10	6.72e-09
CSF3	50.6597	-1.40744	0.351542	-4.00363	6.24e-05	0.000458538
PFKL	108.606	-1.40735	0.277131	-5.07827	3.81e-07	5.16e-06
PSMB10	378.22	-1.40653	0.228965	-6.14296	8.1e-10	1.98e-08
NEDD9	831.395	-1.40619	0.139976	-10.0459	9.57e-24	2.08e-21
LZTR1	226.822	-1.40574	0.316339	-4.44378	8.84e-06	8.39e-05
C17orf59	73.529	-1.40554	0.369698	-3.80187	0.000143609	0.000945347
KRTCAP3	25.8137	-1.40506	0.496244	-2.83139	0.00463456	0.0178206
SIPA1	165.64	-1.40437	0.219789	-6.38963	1.66e-10	4.71e-09
KCNN4	1083.37	-1.40335	0.25501	-5.50311	3.73e-08	6.28e-07
DAB2IP	395.257	-1.40321	0.199446	-7.03555	1.98e-12	7.89e-11
TRABD	110.779	-1.40228	0.345323	-4.06079	4.89e-05	0.000373717
TMED1	1220.77	-1.40194	0.238358	-5.88165	4.06e-09	8.64e-08
SPATC1L	52.9451	-1.40016	0.361084	-3.87764	0.000105473	0.000726771
GFAP	30.5905	-1.39902	0.44372	-3.15293	0.00161638	0.0073673
ATF4	5025.47	-1.39822	0.175568	-7.96402	1.67e-15	1.1e-13
TNK2	243.446	-1.39721	0.271345	-5.14922	2.62e-07	3.67e-06
RPL8	9569.67	-1.39592	0.150237	-9.29144	1.52e-20	1.87e-18
SLC9A3R2	659.676	-1.39452	0.201451	-6.92238	4.44e-12	1.65e-10
PIN1	527.226	-1.39304	0.204136	-6.82409	8.85e-12	3.18e-10
NDUFC1	4929.04	-1.39296	0.206554	-6.74382	1.54e-11	5.26e-10
RRAS	631.988	-1.39272	0.219711	-6.33886	2.31e-10	6.37e-09
PARD6A	99.4782	-1.39198	0.389861	-3.57045	0.000356363	0.00204279
MIER2	185.379	-1.39174	0.311752	-4.46426	8.03e-06	7.72e-05
FCHO1	52.5153	-1.39154	0.485813	-2.86436	0.00417849	0.0163535
STK32A	17.9048	-1.39079	0.547614	-2.53973	0.0110937	0.0366415
ZNF787	82.4002	-1.38982	0.283939	-4.8948	9.84e-07	1.2e-05
SLC47A1	65.9811	-1.38968	0.354948	-3.91516	9.03e-05	0.000633661
ATG2A	114.419	-1.38804	0.292812	-4.74038	2.13e-06	2.38e-05
CST1	4207.65	-1.3867	0.182217	-7.61015	2.74e-14	1.54e-12
RAMP1	540.777	-1.3861	0.183878	-7.53818	4.77e-14	2.56e-12
C22orf46	88.2169	-1.38551	0.338714	-4.0905	4.3e-05	0.000335136
SLC27A5	108.476	-1.38076	0.253911	-5.43796	5.39e-08	8.74e-07
SUV420H2	35.9597	-1.38026	0.416906	-3.31072	0.000930578	0.00458636
HSF1	230.27	-1.37909	0.253481	-5.44063	5.31e-08	8.62e-07
KCNE1L	36.864	-1.37898	0.378212	-3.64604	0.000266308	0.00159964
ZNF165	161.461	-1.37732	0.301348	-4.57052	4.87e-06	5e-05
FAU	3134.96	-1.37627	0.175954	-7.82172	5.21e-15	3.27e-13
SOD3	41.1927	-1.37437	0.494197	-2.78101	0.00541902	0.0203128
DNM2	541.746	-1.37392	0.183607	-7.48295	7.27e-14	3.74e-12
GMFG	202.372	-1.37237	0.238195	-5.76155	8.33e-09	1.64e-07
FLOT1	4278.47	-1.37187	0.143583	-9.55456	1.24e-21	1.83e-19
PYCARD	23.1729	-1.37049	0.445726	-3.07472	0.00210697	0.00924648
CA9	56.2136	-1.368	0.458996	-2.98042	0.00287854	0.0120018
VPS28	477.631	-1.36714	0.192381	-7.10639	1.19e-12	4.96e-11
ETFB	546.037	-1.36642	0.212125	-6.44155	1.18e-10	3.51e-09
S1PR5	46.934	-1.36432	0.446961	-3.05244	0.00226989	0.00983515
EXOSC4	1042.95	-1.36242	0.210554	-6.47063	9.76e-11	2.93e-09
ZNF524	79.6055	-1.36222	0.293157	-4.64673	3.37e-06	3.58e-05
ZNF598	216.795	-1.36089	0.223157	-6.09837	1.07e-09	2.56e-08
ACADVL	1004.41	-1.35868	0.179123	-7.58516	3.32e-14	1.83e-12
PLCD3	541.808	-1.35798	0.180736	-7.51361	5.75e-14	3.03e-12
LOC101927257	36.9671	-1.35701	0.461375	-2.94124	0.00326905	0.0133065
TREX1	147.538	-1.35623	0.390288	-3.47494	0.000510974	0.00275968
SNHG12	273.002	-1.35563	0.232012	-5.84293	5.13e-09	1.06e-07
TAGLN	53.0077	-1.35527	0.321597	-4.21418	2.51e-05	0.000208092
HOXD4	52.8057	-1.35505	0.38736	-3.49818	0.000468449	0.00256712
H2AFJ	133.232	-1.35483	0.28081	-4.82471	1.4e-06	1.64e-05
LOC644656	61.578	-1.35388	0.372474	-3.63483	0.000278161	0.00166214
VPS9D1-AS1	12.3892	-1.3538	0.553251	-2.447	0.0144053	0.0453148
MED25	61.4766	-1.35338	0.343689	-3.93779	8.22e-05	0.000583678
ZNF692	178.644	-1.35326	0.270774	-4.99776	5.8e-07	7.48e-06
LOC284080	27.5349	-1.35284	0.44454	-3.04324	0.00234043	0.0101054
SNRNP35	846.425	-1.35232	0.214077	-6.31699	2.67e-10	7.2e-09
CCDC57	219.431	-1.35157	0.241139	-5.60492	2.08e-08	3.74e-07
C15orf39	198.627	-1.35138	0.264814	-5.10311	3.34e-07	4.59e-06
SARDH	30.899	-1.35055	0.429123	-3.14723	0.00164825	0.00748707
NDUFA11	2073.54	-1.35053	0.178462	-7.56759	3.8e-14	2.07e-12
CTSF	81.1287	-1.34888	0.333797	-4.04101	5.32e-05	0.000401151
ADAM8	1142.52	-1.34543	0.191311	-7.03266	2.03e-12	8.04e-11
STAT5A	347.022	-1.34538	0.280975	-4.78827	1.68e-06	1.93e-05
APOC1	22.3844	-1.34519	0.4909	-2.74026	0.00613914	0.0224822
SNX21	553.753	-1.34501	0.187289	-7.18148	6.9e-13	2.97e-11
NDUFS5	9638.24	-1.34425	0.181962	-7.38753	1.5e-13	7.22e-12
AGPAT2	464.683	-1.34363	0.297123	-4.52212	6.12e-06	6.09e-05
SPEG	83.8599	-1.34277	0.341216	-3.93524	8.31e-05	0.000588612
RHOB	1158.07	-1.34181	0.210504	-6.37428	1.84e-10	5.15e-09
DSCR9	18.8629	-1.34057	0.512847	-2.61399	0.00894922	0.0305835
MZT2A	448.015	-1.34021	0.186575	-7.18325	6.81e-13	2.94e-11
LINC01209	19.6226	-1.33891	0.499252	-2.68182	0.00732221	0.0260371
MAP3K11	127.823	-1.33829	0.258526	-5.17662	2.26e-07	3.22e-06
HSD3B7	572.714	-1.33694	0.172563	-7.74754	9.37e-15	5.62e-13
NR4A2	411.112	-1.33621	0.204611	-6.53048	6.56e-11	2.03e-09
S100A13	848.969	-1.33616	0.186195	-7.17612	7.17e-13	3.07e-11
LOC148413	97.1451	-1.33545	0.368144	-3.62751	0.000286165	0.00170173
SH3GLB2	168.525	-1.33532	0.229079	-5.82906	5.57e-09	1.14e-07
RPS9	1036.72	-1.33466	0.187861	-7.10455	1.21e-12	5.01e-11
C19orf68	34.9931	-1.33352	0.488708	-2.72867	0.00635894	0.0231551
C6orf132	123.551	-1.33335	0.319374	-4.17489	2.98e-05	0.000242831
RPS28	2335.37	-1.33238	0.237598	-5.60773	2.05e-08	3.69e-07
ZFYVE19	233.555	-1.33132	0.246258	-5.40619	6.44e-08	1.02e-06
SHARPIN	668.63	-1.33111	0.233329	-5.70486	1.16e-08	2.24e-07
PHRF1	363.522	-1.3305	0.201007	-6.6192	3.61e-11	1.16e-09
LINC00260	85.3849	-1.32987	0.317947	-4.18267	2.88e-05	0.000235495
RPS19	3415.96	-1.3292	0.205522	-6.46743	9.97e-11	2.98e-09
TONSL	317.875	-1.32874	0.210833	-6.30233	2.93e-10	7.84e-09
CARD14	25.0712	-1.32871	0.441206	-3.01154	0.00259926	0.0110069
CXXC1	283.816	-1.32564	0.188263	-7.04143	1.9e-12	7.6e-11
RPL27A	3575.34	-1.32546	0.226557	-5.85044	4.9e-09	1.03e-07
WDR74	500.59	-1.32469	0.212417	-6.2363	4.48e-10	1.16e-08
PPP1R37	49.9304	-1.3244	0.380017	-3.4851	0.000491952	0.00267583
ABTB1	134.364	-1.3241	0.275551	-4.80529	1.55e-06	1.78e-05
IDH1-AS1	50.074	-1.32311	0.346658	-3.81677	0.000135212	0.000896688
SCRN2	116.559	-1.3225	0.304133	-4.34844	1.37e-05	0.000123516
FOXD4	22.6921	-1.3187	0.476029	-2.77021	0.00560207	0.0208723
NPIPB3	54.0024	-1.3184	0.443945	-2.96974	0.00298047	0.0123573
TMCC1-AS1	50.2246	-1.31763	0.346864	-3.79871	0.000145451	0.0009563
FAM109B	63.6869	-1.31743	0.350188	-3.76205	0.000168525	0.00108884
WNT7B	52.7381	-1.31698	0.337122	-3.90653	9.36e-05	0.000653016
COX8A	5313.21	-1.31647	0.178026	-7.39483	1.42e-13	6.89e-12
FAM102A	272.023	-1.31462	0.238043	-5.52263	3.34e-08	5.69e-07
RPL28	1077.99	-1.31462	0.184347	-7.1312	9.95e-13	4.18e-11
POR	79.7216	-1.31319	0.378472	-3.4697	0.000521038	0.00280648
MRPL27	4516.04	-1.31265	0.141164	-9.29876	1.42e-20	1.76e-18
GALK1	90.2449	-1.30892	0.352357	-3.71475	0.000203407	0.00127822
PCYT2	93.3358	-1.30873	0.338716	-3.86379	0.000111642	0.000762091
NAPRT1	144.554	-1.30817	0.341966	-3.82543	0.000130543	0.000870393
IQCC	53.0518	-1.30772	0.439437	-2.9759	0.00292132	0.0121497
RPS3	11810.5	-1.30641	0.160879	-8.12046	4.64e-16	3.33e-14
ZNF784	20.3277	-1.3061	0.507291	-2.57465	0.0100342	0.033626
FOXP4	167.224	-1.30552	0.249596	-5.23054	1.69e-07	2.49e-06
SERF2	1127.58	-1.30551	0.138015	-9.45922	3.1e-21	4.26e-19
RPL34	8916.32	-1.30292	0.228917	-5.69169	1.26e-08	2.39e-07
MUTYH	290.233	-1.30279	0.181323	-7.18492	6.72e-13	2.91e-11
LIMS2	25.5594	-1.30195	0.486441	-2.67647	0.00744019	0.0263516
NEDD8	2721.31	-1.30171	0.156775	-8.30304	1.01e-16	7.91e-15
LRRC45	33.5218	-1.30062	0.461886	-2.81588	0.00486441	0.0185367
CDK2AP2	2409.56	-1.3002	0.178119	-7.2996	2.89e-13	1.32e-11
MRC2	211.429	-1.30004	0.225134	-5.77454	7.72e-09	1.53e-07
ASPSCR1	180.686	-1.29832	0.22766	-5.70287	1.18e-08	2.26e-07
GLTPD1	61.6304	-1.29775	0.379657	-3.4182	0.000630358	0.00329798
HELZ2	69.0058	-1.29752	0.327201	-3.9655	7.32e-05	0.000527654
SLC4A11	248.176	-1.29732	0.233597	-5.55369	2.8e-08	4.87e-07
WFDC3	230.584	-1.29729	0.249914	-5.19093	2.09e-07	3.01e-06
LOC101926896	16.1758	-1.29684	0.520019	-2.49383	0.0126372	0.0407507
ZNF653	35.2393	-1.296	0.447893	-2.89354	0.00380925	0.0151334
ZNF408	127.837	-1.29596	0.285437	-4.54024	5.62e-06	5.66e-05
C19orf53	2068.24	-1.29496	0.140834	-9.19498	3.75e-20	4.4e-18
PITPNM3	41.171	-1.29486	0.360278	-3.59405	0.000325572	0.00189469
C11orf31	1907.79	-1.29466	0.155109	-8.34679	7.01e-17	5.69e-15
ADAMTS1	499.143	-1.29367	0.270701	-4.77895	1.76e-06	2.02e-05
CCDC9	143.584	-1.29065	0.325107	-3.96991	7.19e-05	0.000519271
TOPORS-AS1	92.5931	-1.28948	0.302918	-4.25685	2.07e-05	0.000175357
MRPL2	2620.5	-1.28832	0.179621	-7.17245	7.37e-13	3.15e-11
CLU	56.503	-1.28761	0.443204	-2.90522	0.00366991	0.0146669
SNHG9	64.9706	-1.28746	0.355989	-3.61657	0.000298533	0.001759
MRPL14	8884.48	-1.28723	0.125779	-10.234	1.4e-24	3.35e-22
STX4	216.206	-1.28677	0.2514	-5.11842	3.08e-07	4.27e-06
MAN2C1	253.191	-1.28669	0.222719	-5.7772	7.6e-09	1.51e-07
CYHR1	623.778	-1.28635	0.213308	-6.0305	1.63e-09	3.73e-08
RPS27A	4014.27	-1.28592	0.209554	-6.13645	8.44e-10	2.05e-08
RPS17	66.782	-1.28323	0.37128	-3.45623	0.000547796	0.00292962
TRMT61A	176.476	-1.2788	0.254326	-5.0282	4.95e-07	6.49e-06
BAG6	2010.82	-1.27846	0.168304	-7.59611	3.05e-14	1.7e-12
TRMT10A	382.498	-1.27808	0.192551	-6.63765	3.19e-11	1.03e-09
ENO3	293.676	-1.27682	0.203564	-6.27234	3.56e-10	9.35e-09
FITM2	267.368	-1.27579	0.211353	-6.0363	1.58e-09	3.61e-08
C11orf68	430.866	-1.27429	0.242502	-5.25477	1.48e-07	2.2e-06
RPL19	9965.71	-1.27413	0.156024	-8.16625	3.18e-16	2.33e-14
RPS29	3658.59	-1.27288	0.246682	-5.16002	2.47e-07	3.49e-06
HIST1H2AM	49.7916	-1.27186	0.326566	-3.89466	9.83e-05	0.000682563
CAPN1	522.175	-1.27167	0.168966	-7.52617	5.22e-14	2.79e-12
PKN1	608.988	-1.27114	0.1862	-6.82675	8.69e-12	3.13e-10
TSPAN1	285.474	-1.26937	0.204895	-6.1952	5.82e-10	1.47e-08
HSPBP1	482.259	-1.26922	0.192894	-6.57989	4.71e-11	1.49e-09
COPRS	5860.59	-1.26914	0.137761	-9.21262	3.18e-20	3.79e-18
IFFO1	96.0679	-1.26794	0.293098	-4.32598	1.52e-05	0.000134123
SDSL	97.3848	-1.26665	0.294354	-4.30316	1.68e-05	0.000146187
TMEM86B	294.126	-1.2663	0.267488	-4.73404	2.2e-06	2.44e-05
CORO1B	215.917	-1.26462	0.269605	-4.69063	2.72e-06	2.97e-05
PNPLA2	194.941	-1.26458	0.247244	-5.11469	3.14e-07	4.35e-06
GPS2	1547.14	-1.26321	0.182142	-6.9353	4.05e-12	1.52e-10
GSTP1	2076.91	-1.26255	0.146617	-8.61127	7.23e-18	6.59e-16
FAM46C	304.652	-1.26083	0.292964	-4.3037	1.68e-05	0.000145916
ANXA11	1375.34	-1.26056	0.181472	-6.94632	3.75e-12	1.41e-10
PPP1R16A	119.687	-1.25883	0.329349	-3.82217	0.000132284	0.000879812
LAMTOR2	1157.98	-1.25868	0.1952	-6.44818	1.13e-10	3.37e-09
TSC22D4	129.124	-1.2584	0.278532	-4.51798	6.24e-06	6.19e-05
PACSIN3	110.664	-1.25803	0.333548	-3.77166	0.000162166	0.00105326
PHLDA2	10880.7	-1.2579	0.165009	-7.62325	2.47e-14	1.42e-12
CCDC124	555.889	-1.25732	0.240532	-5.22723	1.72e-07	2.53e-06
LINC01176	29.7133	-1.25619	0.445734	-2.81824	0.00482873	0.0184445
IRF3	570.1	-1.25262	0.1798	-6.96672	3.24e-12	1.24e-10
GPSM1	93.6038	-1.2511	0.309424	-4.04331	5.27e-05	0.000398349
ISG15	354.102	-1.25089	0.190732	-6.55836	5.44e-11	1.7e-09
MRPS34	840.086	-1.25071	0.183401	-6.81955	9.13e-12	3.27e-10
BAIAP2-AS1	31.5284	-1.24978	0.40894	-3.05616	0.00224194	0.00973508
PCIF1	910.094	-1.24862	0.168844	-7.3951	1.41e-13	6.89e-12
LY6E	494.327	-1.24859	0.186484	-6.69542	2.15e-11	7.2e-10
SPATA20	323.246	-1.247	0.201335	-6.19362	5.88e-10	1.48e-08
NLRP14	22.2784	-1.24669	0.51207	-2.4346	0.0149081	0.0466317
RFXANK	161.019	-1.24669	0.307589	-4.05309	5.05e-05	0.000384771
RPS21	4096.19	-1.24624	0.244892	-5.08894	3.6e-07	4.91e-06
GPX1	4263.51	-1.2462	0.146402	-8.51218	1.71e-17	1.48e-15
ZNF418	101.98	-1.24546	0.275153	-4.52642	6e-06	6e-05
RPLP1	5356.81	-1.2453	0.202002	-6.16479	7.06e-10	1.74e-08
NDUFB3	6873.04	-1.24422	0.17575	-7.07949	1.45e-12	5.94e-11
CORO7	46.0337	-1.24399	0.383993	-3.23961	0.00119692	0.0056963
PAX8	210.647	-1.2439	0.228567	-5.44216	5.26e-08	8.57e-07
PSMB6	12246.7	-1.24286	0.142326	-8.73251	2.49e-18	2.5e-16
GAMT	131.117	-1.24259	0.287596	-4.32062	1.56e-05	0.000136937
NUCB2	2343.78	-1.24212	0.207073	-5.99848	1.99e-09	4.47e-08
LSP1	25.0606	-1.24082	0.458964	-2.70352	0.006861	0.0246701
NES	224.891	-1.2407	0.241557	-5.13629	2.8e-07	3.91e-06
RTKN	196.619	-1.23936	0.229343	-5.40398	6.52e-08	1.03e-06
ACSS1	45.8165	-1.23933	0.413226	-2.99917	0.0027072	0.011386
ARL2	445.622	-1.23933	0.182037	-6.80811	9.89e-12	3.52e-10
SNHG6	596.037	-1.23775	0.21916	-5.64771	1.63e-08	3.01e-07
HLA-A	3931.07	-1.23745	0.151427	-8.17192	3.04e-16	2.25e-14
EHD1	1786.86	-1.2364	0.183028	-6.75522	1.43e-11	4.94e-10
NUMA1	1028.64	-1.236	0.15291	-8.08318	6.31e-16	4.46e-14
HTR1D	132.588	-1.23506	0.320193	-3.85723	0.000114679	0.000779839
LAMB3	1013.58	-1.23456	0.211546	-5.8359	5.35e-09	1.1e-07
RBM42	866.126	-1.23438	0.220955	-5.58658	2.32e-08	4.11e-07
MRPS12	1847.75	-1.23397	0.137958	-8.94452	3.74e-19	4.03e-17
TLR9	24.9604	-1.23363	0.487691	-2.52954	0.0114214	0.037476
PELP1	240.609	-1.23322	0.230431	-5.3518	8.71e-08	1.36e-06
TMEM54	468.453	-1.23198	0.243849	-5.05221	4.37e-07	5.83e-06
ZNF530	119.333	-1.23162	0.292848	-4.20565	2.6e-05	0.000214878
COX5B	2903.97	-1.23151	0.168259	-7.31916	2.5e-13	1.17e-11
HDAC10	36.768	-1.23126	0.417101	-2.95195	0.00315778	0.0129274
ING2	764.077	-1.23092	0.174499	-7.05402	1.74e-12	7.01e-11
PNKP	384.969	-1.23089	0.196496	-6.26421	3.75e-10	9.8e-09
CAPN10	80.7254	-1.2299	0.372273	-3.30376	0.000953967	0.00469443
DHX30	1577.78	-1.22933	0.197181	-6.23453	4.53e-10	1.17e-08
RPS12	2786.24	-1.22902	0.373115	-3.29394	0.000987932	0.00484404
ZDHHC24	66.0309	-1.22835	0.308308	-3.98417	6.77e-05	0.00049349
ATP5D	209.149	-1.22818	0.22613	-5.43131	5.59e-08	9.02e-07
KIF13A	614.893	-1.2268	0.231507	-5.29921	1.16e-07	1.76e-06
GPRC5B	112.581	-1.22518	0.271078	-4.51965	6.19e-06	6.15e-05
BATF3	108.952	-1.2243	0.290061	-4.22083	2.43e-05	0.000202886
POLE4	1929.89	-1.22341	0.175666	-6.96442	3.3e-12	1.26e-10
SURF2	233.698	-1.22269	0.261364	-4.67811	2.9e-06	3.12e-05
R3HCC1	517.038	-1.22209	0.243757	-5.01354	5.34e-07	6.96e-06
RPL30	4892.71	-1.22187	0.225824	-5.41073	6.28e-08	1e-06
ECI1	268.032	-1.22186	0.248233	-4.92225	8.56e-07	1.06e-05
HEXIM2	181.581	-1.22149	0.308646	-3.95756	7.57e-05	0.000541985
PEX16	324.027	-1.2214	0.216942	-5.63009	1.8e-08	3.29e-07
RAB1B	442.927	-1.22106	0.221741	-5.50671	3.66e-08	6.19e-07
SBNO2	157.206	-1.22027	0.280469	-4.35081	1.36e-05	0.00012266
PLXNB2	245.512	-1.22	0.204735	-5.95893	2.54e-09	5.61e-08
RPL3	4082.1	-1.21912	0.184158	-6.61996	3.59e-11	1.15e-09
CLTB	1673.69	-1.21874	0.168047	-7.25235	4.1e-13	1.81e-11
PLXNA3	119.985	-1.21809	0.303726	-4.01049	6.06e-05	0.000447677
ARHGEF19	141.362	-1.21605	0.248654	-4.89054	1.01e-06	1.22e-05
HOMER3	167.15	-1.21515	0.275421	-4.41197	1.02e-05	9.55e-05
FAM229A	46.8339	-1.21388	0.340477	-3.56524	0.000363525	0.00207865
MRPL51	6528.54	-1.2126	0.194774	-6.2257	4.79e-10	1.23e-08
KIF7	103.418	-1.21214	0.355556	-3.40915	0.000651668	0.00338522
SIL1	380.245	-1.21028	0.289631	-4.17869	2.93e-05	0.000239167
TMA7	8014.63	-1.21	0.221068	-5.47343	4.41e-08	7.3e-07
LAMA4	59.6239	-1.2094	0.330705	-3.65704	0.000255145	0.00154588
C12orf57	1557.37	-1.20875	0.187855	-6.4345	1.24e-10	3.64e-09
ITGA3	1331.73	-1.20823	0.162357	-7.44179	9.93e-14	4.94e-12
LRRC14	73.5336	-1.2073	0.327413	-3.6874	0.000226561	0.00139801
CARD16	255.461	-1.20693	0.234784	-5.14059	2.74e-07	3.84e-06
CCDC69	754.184	-1.2068	0.209463	-5.7614	8.34e-09	1.64e-07
ACOT8	406.037	-1.20573	0.207232	-5.81827	5.95e-09	1.21e-07
DGCR6L	162.683	-1.20475	0.276721	-4.35364	1.34e-05	0.000121297
COASY	854.934	-1.20449	0.222642	-5.41	6.3e-08	1e-06
NELFE	1226.48	-1.20412	0.224623	-5.36061	8.29e-08	1.3e-06
SNRPD3	4234.33	-1.20365	0.160001	-7.52276	5.36e-14	2.83e-12
C10orf54	108.217	-1.20362	0.282608	-4.25898	2.05e-05	0.000174249
GLYCTK	165.922	-1.20341	0.258882	-4.64849	3.34e-06	3.55e-05
PTPRH	98.1946	-1.20313	0.245893	-4.89291	9.94e-07	1.21e-05
PRR12	62.9242	-1.20299	0.332359	-3.61955	0.000295117	0.00174217
MRPL28	573.184	-1.20255	0.229001	-5.25127	1.51e-07	2.24e-06
URM1	1140.16	-1.20121	0.187516	-6.40593	1.49e-10	4.3e-09
CENPW	1887.62	-1.20108	0.213618	-5.62255	1.88e-08	3.42e-07
GPATCH3	131.251	-1.20072	0.267512	-4.48848	7.17e-06	7e-05
SMPD1	296.497	-1.20025	0.268191	-4.47535	7.63e-06	7.37e-05
LOC101927415	42.1824	-1.20011	0.403482	-2.97439	0.00293574	0.0122002
NDUFB8	4082.9	-1.20007	0.128312	-9.3527	8.54e-21	1.07e-18
RPL22L1	1088.81	-1.19893	0.247292	-4.84825	1.25e-06	1.47e-05
RRP36	2233.65	-1.19809	0.163895	-7.31007	2.67e-13	1.24e-11
MYEOV2	3371.64	-1.19713	0.385826	-3.10278	0.0019171	0.00853923
WDR18	264.547	-1.19709	0.310953	-3.84973	0.000118248	0.000800376
CPSF1	211.344	-1.19658	0.244585	-4.8923	9.97e-07	1.21e-05
ZNF428	91.5918	-1.19624	0.331819	-3.60508	0.000312055	0.00182263
FANCE	1231.39	-1.19594	0.203509	-5.87657	4.19e-09	8.86e-08
NUDT16	378.889	-1.19461	0.168255	-7.10002	1.25e-12	5.15e-11
GFER	158.7	-1.19398	0.288618	-4.13688	3.52e-05	0.000281334
CD96	680.484	-1.19314	0.418417	-2.85157	0.00435043	0.016907
SPC24	84.387	-1.19244	0.316273	-3.7703	0.000163052	0.00105816
SWI5	376.314	-1.19243	0.178523	-6.67943	2.4e-11	7.99e-10
RPL7	9754.98	-1.19225	0.167099	-7.13498	9.68e-13	4.08e-11
SON	11176.9	-1.19205	0.197394	-6.03892	1.55e-09	3.57e-08
LPPR2	190.068	-1.19173	0.290765	-4.09859	4.16e-05	0.000324889
RPL27	8676.12	-1.1914	0.186439	-6.39027	1.66e-10	4.7e-09
MYL6	22707.2	-1.19126	0.147936	-8.05257	8.11e-16	5.64e-14
GPX4	1415.55	-1.19104	0.141366	-8.42521	3.6e-17	3.04e-15
GPAA1	561.27	-1.1908	0.230676	-5.16222	2.44e-07	3.46e-06
NFKBIE	362.274	-1.19044	0.229869	-5.1788	2.23e-07	3.19e-06
MRPS18A	1335.4	-1.19036	0.169002	-7.04346	1.88e-12	7.51e-11
ABCF1	3471.84	-1.18926	0.150596	-7.89702	2.86e-15	1.83e-13
GSTZ1	269.944	-1.18863	0.261605	-4.5436	5.53e-06	5.58e-05
SYTL2	197.784	-1.18702	0.259275	-4.57821	4.69e-06	4.83e-05
ARFGAP1	911.045	-1.18637	0.20297	-5.84505	5.06e-09	1.05e-07
LINC00115	39.8492	-1.1861	0.41524	-2.85641	0.00428457	0.0166955
GDPD3	23.3052	-1.18599	0.477106	-2.4858	0.0129261	0.0414822
C12orf45	841.558	-1.18536	0.177887	-6.66359	2.67e-11	8.83e-10
LAMB2	1009.31	-1.18385	0.227606	-5.20133	1.98e-07	2.85e-06
C19orf43	4613.66	-1.18339	0.136178	-8.69	3.62e-18	3.51e-16
BCR	209	-1.18294	0.284778	-4.15391	3.27e-05	0.000263546
EEF1D	2253.13	-1.18167	0.208089	-5.67869	1.36e-08	2.56e-07
SGSM3	53.6935	-1.18121	0.342	-3.45382	0.000552704	0.00295131
MRPS26	1940.13	-1.17822	0.162841	-7.23544	4.64e-13	2.04e-11
PLXND1	198.377	-1.17788	0.239482	-4.91844	8.72e-07	1.08e-05
TFAP2E	30.6022	-1.17571	0.395664	-2.9715	0.00296352	0.0122998
PRKAR1B	81.4275	-1.1756	0.330567	-3.55632	0.000376092	0.00213682
PHLDA3	73.9766	-1.17535	0.339646	-3.4605	0.000539165	0.00288765
LOC728323	114.085	-1.17398	0.288869	-4.06406	4.82e-05	0.000369207
MIB2	37.3897	-1.17183	0.405872	-2.88719	0.00388694	0.0153925
GCAT	74.5986	-1.17143	0.428718	-2.73241	0.00628729	0.0229463
FAM177A1	1454.09	-1.17137	0.208171	-5.62695	1.83e-08	3.34e-07
ZGPAT	139.591	-1.17087	0.340477	-3.43892	0.00058404	0.00309293
LRWD1	70.1838	-1.17083	0.345523	-3.38858	0.000702548	0.00360522
DYNLL2	144.007	-1.17052	0.29911	-3.91335	9.1e-05	0.000638165
MADD	706.985	-1.17017	0.224292	-5.2172	1.82e-07	2.65e-06
CTU2	83.3953	-1.17007	0.331706	-3.52742	0.000419629	0.00233625
ASL	152.496	-1.16936	0.227675	-5.13611	2.8e-07	3.91e-06
RPL26	6219.95	-1.16788	0.200322	-5.83001	5.54e-09	1.14e-07
HSF4	74.3656	-1.16771	0.32551	-3.58732	0.000334093	0.00193447
SGK223	264.148	-1.16767	0.237173	-4.92327	8.51e-07	1.06e-05
NDUFB1	2868.29	-1.16682	0.227357	-5.1321	2.87e-07	3.99e-06
MLST8	138.084	-1.16681	0.344739	-3.38464	0.000712725	0.00364579
SAC3D1	494.989	-1.1656	0.173897	-6.70281	2.04e-11	6.86e-10
LOC493754	796.087	-1.16507	0.171599	-6.7895	1.13e-11	3.95e-10
C6orf106	2598.08	-1.16469	0.171113	-6.80657	1e-11	3.55e-10
EMC9	859.442	-1.16468	0.184526	-6.31175	2.76e-10	7.42e-09
LINC00173	33.8652	-1.16415	0.458932	-2.53665	0.0111918	0.0368668
TSPAN4	665.226	-1.16411	0.281806	-4.13088	3.61e-05	0.000287916
RAB24	485.747	-1.1639	0.206502	-5.63627	1.74e-08	3.2e-07
SDHAF1	106.223	-1.16315	0.304885	-3.81504	0.00013616	0.000901856
CCDC94	168.629	-1.16309	0.264253	-4.40141	1.08e-05	9.97e-05
CYC1	5427.66	-1.16123	0.23845	-4.86991	1.12e-06	1.34e-05
SLC25A45	69.4753	-1.15889	0.326434	-3.55015	0.000385006	0.00217614
LAGE3	1155.7	-1.15854	0.157476	-7.3569	1.88e-13	8.92e-12
RPS25	7300.72	-1.15818	0.178143	-6.50144	7.96e-11	2.43e-09
NDUFA2	3106.19	-1.15667	0.20018	-5.77813	7.55e-09	1.51e-07
PER1	176.191	-1.15606	0.259048	-4.46271	8.09e-06	7.77e-05
SHROOM1	216.111	-1.15593	0.233999	-4.93988	7.82e-07	9.8e-06
ABLIM2	34.5361	-1.15592	0.443588	-2.60585	0.00916461	0.0312332
SORBS3	182.035	-1.15521	0.266936	-4.32767	1.51e-05	0.000133294
HDHD3	116.536	-1.1552	0.37208	-3.1047	0.0019047	0.00849815
TAF10	530.444	-1.15495	0.184287	-6.26711	3.68e-10	9.64e-09
SNRPF	4613.37	-1.1547	0.253586	-4.55348	5.28e-06	5.36e-05
TMEM205	2468.83	-1.15422	0.147741	-7.81244	5.61e-15	3.49e-13
S100A6	14395.4	-1.15374	0.186092	-6.19985	5.65e-10	1.43e-08
EDN2	73.5814	-1.15347	0.365171	-3.15871	0.00158471	0.00725172
ZNHIT1	290.956	-1.15229	0.231468	-4.9782	6.42e-07	8.21e-06
TMUB1	326.07	-1.1522	0.204266	-5.64068	1.69e-08	3.12e-07
IGFLR1	94.7237	-1.15217	0.280794	-4.10325	4.07e-05	0.00031982
SPAG7	1971.87	-1.15203	0.205319	-5.61093	2.01e-08	3.64e-07
CARHSP1	763.719	-1.15199	0.169402	-6.80032	1.04e-11	3.7e-10
ARHGAP22	185.99	-1.1518	0.227069	-5.07247	3.93e-07	5.29e-06
UBXN11	79.8371	-1.15162	0.301427	-3.82055	0.000133154	0.000884951
ADPRHL2	1259.75	-1.1516	0.227007	-5.07298	3.92e-07	5.28e-06
GPANK1	355.763	-1.15138	0.1898	-6.0663	1.31e-09	3.05e-08
NRDE2	837.47	-1.15137	0.207463	-5.54975	2.86e-08	4.95e-07
KRT8	1767.19	-1.1494	0.205126	-5.6034	2.1e-08	3.76e-07
SNORD38B	26.0595	-1.14935	0.453068	-2.53683	0.0111863	0.036863
RPS6KB2	158.145	-1.14934	0.392762	-2.92629	0.00343035	0.0138299
INF2	832.717	-1.14898	0.167559	-6.85717	7.02e-12	2.55e-10
ENTHD2	197.819	-1.14743	0.235492	-4.87249	1.1e-06	1.32e-05
ATP5J2	425.617	-1.14547	0.187149	-6.12063	9.32e-10	2.25e-08
GPATCH4	1014.92	-1.14428	0.202653	-5.64649	1.64e-08	3.03e-07
EPN1	82.3069	-1.14423	0.321119	-3.56327	0.000366269	0.00209014
UQCR11	1931.95	-1.14383	0.181121	-6.31531	2.7e-10	7.27e-09
ANGPTL2	71.3552	-1.14337	0.339549	-3.36731	0.000759048	0.00383753
TMEM161B-AS1	517.668	-1.14295	0.242226	-4.71852	2.38e-06	2.61e-05
GPR158	42.9002	-1.14291	0.45277	-2.52426	0.0115941	0.0379759
SAT2	350.723	-1.14225	0.207979	-5.49215	3.97e-08	6.64e-07
BLVRB	158.896	-1.1415	0.305848	-3.73226	0.000189769	0.00120477
PSMG4	903.714	-1.14068	0.196603	-5.80197	6.55e-09	1.32e-07
MOB3C	120.142	-1.14043	0.278138	-4.10022	4.13e-05	0.000323409
TIMM8B	2323.19	-1.14022	0.15183	-7.50982	5.92e-14	3.11e-12
TMEM107	1386.86	-1.13985	0.191058	-5.96597	2.43e-09	5.39e-08
CST3	2947.86	-1.13974	0.14954	-7.62163	2.51e-14	1.43e-12
TMEM120A	210.409	-1.13911	0.226428	-5.03077	4.89e-07	6.42e-06
MRPL55	1122.46	-1.13904	0.145827	-7.8109	5.68e-15	3.52e-13
RPL23A	8764.68	-1.13887	0.187163	-6.08493	1.17e-09	2.76e-08
IFI35	216.6	-1.13887	0.310336	-3.66979	0.000242752	0.00147945
GALM	201.216	-1.13867	0.207206	-5.49536	3.9e-08	6.53e-07
ZNF7	414.308	-1.13854	0.176996	-6.43259	1.25e-10	3.68e-09
TGFB1I1	301.236	-1.13827	0.224146	-5.07828	3.81e-07	5.16e-06
NTMT1	251.62	-1.13789	0.262601	-4.33316	1.47e-05	0.000130743
RRP8	524.047	-1.13696	0.228711	-4.97115	6.66e-07	8.46e-06
SFXN5	194.965	-1.13513	0.288794	-3.9306	8.47e-05	0.000598504
FHOD1	149.209	-1.13459	0.280831	-4.04012	5.34e-05	0.000402144
UQCRQ	3157.97	-1.13412	0.176259	-6.43443	1.24e-10	3.64e-09
DGKQ	63.2646	-1.13353	0.327553	-3.4606	0.000538977	0.00288761
TSPO	1204.08	-1.13334	0.1803	-6.28588	3.26e-10	8.65e-09
MMP24-AS1	157.376	-1.13279	0.299203	-3.78604	0.000153068	0.000999178
ARRB1	174.365	-1.13267	0.253307	-4.47154	7.77e-06	7.49e-05
SLIRP	5766.51	-1.13263	0.227668	-4.97491	6.53e-07	8.32e-06
BAIAP2	465.628	-1.13259	0.17706	-6.39665	1.59e-10	4.54e-09
FBRS	164.169	-1.13243	0.227602	-4.97549	6.51e-07	8.3e-06
SRRT	1010.45	-1.13193	0.131863	-8.58412	9.15e-18	8.17e-16
ZNF414	42.0816	-1.13149	0.381651	-2.96474	0.00302942	0.0125022
TENC1	127.871	-1.12957	0.28086	-4.02184	5.77e-05	0.000430797
DOK4	29.8741	-1.12923	0.458135	-2.46485	0.0137071	0.0433991
SP5	36.9975	-1.12878	0.378165	-2.98489	0.00283683	0.0118548
CLPB	316.548	-1.12855	0.23745	-4.75279	2.01e-06	2.25e-05
MAPK3	96.5973	-1.12658	0.277403	-4.06117	4.88e-05	0.000373282
ZNF511	968.363	-1.12601	0.174848	-6.4399	1.2e-10	3.54e-09
TOR4A	903.639	-1.12504	0.178352	-6.30797	2.83e-10	7.59e-09
METTL5	5938.97	-1.12413	0.156608	-7.17796	7.08e-13	3.04e-11
IMPDH1	164.69	-1.12297	0.293214	-3.82988	0.000128207	0.000857668
RPS20	2300.32	-1.12292	0.233564	-4.80777	1.53e-06	1.76e-05
ZFPL1	381.762	-1.12267	0.251725	-4.4599	8.2e-06	7.86e-05
CCL26	121.527	-1.121	0.366453	-3.05906	0.00222036	0.00965441
TIE1	71.272	-1.1204	0.333409	-3.36045	0.00077816	0.00392427
KMT2E-AS1	78.7894	-1.12031	0.277179	-4.04184	5.3e-05	0.000400107
SNRPD2	5712.9	-1.12009	0.173067	-6.47199	9.67e-11	2.91e-09
SLC46A2	38.99	-1.11976	0.425084	-2.6342	0.00843361	0.0291438
C19orf48	1253.06	-1.11954	0.268846	-4.16425	3.12e-05	0.000253022
PPM1M	70.7487	-1.11915	0.320712	-3.48957	0.000483791	0.00264038
MPG	386.221	-1.1191	0.235962	-4.74272	2.11e-06	2.36e-05
PLEKHJ1	527.189	-1.11859	0.214762	-5.2085	1.9e-07	2.76e-06
NOP9	58.2038	-1.11856	0.328026	-3.40999	0.000649652	0.00337911
RPL17	73.5771	-1.11774	0.281366	-3.97254	7.11e-05	0.000514267
TLR2	270.714	-1.11772	0.227796	-4.90665	9.26e-07	1.14e-05
XAB2	82.0617	-1.11715	0.312942	-3.56983	0.000357213	0.0020462
RNH1	1141.77	-1.11715	0.183501	-6.08798	1.14e-09	2.71e-08
TOP1MT	219.017	-1.11697	0.308016	-3.62634	0.000287464	0.0017082
FXYD5	1657.6	-1.11444	0.186268	-5.98299	2.19e-09	4.88e-08
PRRT3-AS1	160.794	-1.11349	0.233253	-4.77374	1.81e-06	2.06e-05
TBL3	116.176	-1.11292	0.278528	-3.99573	6.45e-05	0.000473021
PRKCDBP	751.917	-1.1127	0.188868	-5.89143	3.83e-09	8.17e-08
NFKBIA	11126.6	-1.11229	0.143443	-7.75422	8.89e-15	5.37e-13
FAM129B	1641.87	-1.11213	0.200328	-5.55151	2.83e-08	4.92e-07
PMVK	309.163	-1.11161	0.172159	-6.45688	1.07e-10	3.19e-09
PLEKHG4	59.623	-1.1104	0.382731	-2.90125	0.00371683	0.0148248
TMEM141	63.6391	-1.10948	0.408103	-2.71861	0.0065556	0.0237564
NDUFV1	1102.67	-1.10858	0.230904	-4.80105	1.58e-06	1.82e-05
PTPMT1	1551.71	-1.1085	0.129335	-8.57082	1.03e-17	9.1e-16
GNB1L	111.567	-1.1078	0.384719	-2.87951	0.00398298	0.0157186
PLEKHO1	82.0662	-1.10748	0.271178	-4.08398	4.43e-05	0.000342833
PRDM8	644.883	-1.1072	0.202047	-5.47992	4.26e-08	7.07e-07
ZNF749	143.837	-1.10717	0.224031	-4.94204	7.73e-07	9.7e-06
SYTL4	332.832	-1.10663	0.202657	-5.46062	4.74e-08	7.81e-07
AMH	40.9186	-1.1066	0.379674	-2.9146	0.00356147	0.0142797
TOM1	69.629	-1.10654	0.302198	-3.66165	0.000250599	0.00152121
SKIV2L	245.292	-1.10622	0.278018	-3.97896	6.92e-05	0.000502379
MAF1	1872.95	-1.10615	0.200934	-5.50502	3.69e-08	6.23e-07
ATP1A1-AS1	112.508	-1.10589	0.244098	-4.53053	5.88e-06	5.89e-05
ACP2	370.151	-1.10541	0.213107	-5.1871	2.14e-07	3.07e-06
RHOT2	431.399	-1.10524	0.233865	-4.72598	2.29e-06	2.53e-05
RPL29	5020.87	-1.10485	0.139126	-7.94136	2e-15	1.31e-13
COA3	5453.05	-1.10376	0.137625	-8.0201	1.06e-15	7.22e-14
TRAPPC2L	476.448	-1.103	0.186503	-5.91409	3.34e-09	7.17e-08
RPUSD1	136.315	-1.10222	0.253868	-4.34169	1.41e-05	0.000126991
THAP3	188.079	-1.10195	0.26983	-4.08388	4.43e-05	0.000342833
CC2D1A	128.658	-1.1007	0.235814	-4.66764	3.05e-06	3.28e-05
HGS	1120.5	-1.10053	0.179315	-6.13743	8.39e-10	2.04e-08
FKBPL	157.938	-1.1003	0.241543	-4.55529	5.23e-06	5.33e-05
MFAP1	1110.72	-1.09606	0.181312	-6.04516	1.49e-09	3.45e-08
TNFRSF14	105.614	-1.09568	0.307252	-3.56605	0.000362396	0.00207367
PTGES2	338.936	-1.09563	0.256901	-4.26479	2e-05	0.00017086
ECE1	773.014	-1.09541	0.192396	-5.69352	1.24e-08	2.37e-07
S100A11	13237.1	-1.09503	0.147866	-7.40556	1.31e-13	6.4e-12
PKMYT1	175.189	-1.0946	0.366719	-2.98485	0.00283713	0.0118548
TNIP1	1219.32	-1.09359	0.194617	-5.61917	1.92e-08	3.49e-07
IL27RA	286.888	-1.09338	0.201613	-5.42318	5.85e-08	9.41e-07
ABHD17A	143.86	-1.09336	0.351238	-3.11288	0.0018527	0.00829909
ZC3H12A	118.197	-1.09267	0.271608	-4.02296	5.75e-05	0.000429158
PFDN6	553.879	-1.09261	0.196055	-5.57296	2.5e-08	4.42e-07
PDDC1	485.539	-1.09223	0.224945	-4.85557	1.2e-06	1.43e-05
TNKS1BP1	479.374	-1.09214	0.154725	-7.05861	1.68e-12	6.84e-11
LOC100128568	46.038	-1.0905	0.378453	-2.88148	0.00395815	0.0156394
MIRLET7BHG	172.162	-1.08987	0.25135	-4.33606	1.45e-05	0.00012937
CUL7	236.04	-1.08972	0.231615	-4.70486	2.54e-06	2.79e-05
SURF1	473.893	-1.0888	0.19597	-5.55594	2.76e-08	4.82e-07
KRT18	2520.64	-1.08816	0.207843	-5.23547	1.65e-07	2.42e-06
THAP7	142.746	-1.08805	0.318084	-3.42064	0.000624739	0.00327285
PIN4	1976.34	-1.08799	0.201028	-5.41215	6.23e-08	9.96e-07
OST4	1445.5	-1.08775	0.210969	-5.15598	2.52e-07	3.54e-06
RPL37	5537.75	-1.08748	0.24046	-4.52249	6.11e-06	6.09e-05
SNRPD1	11899.8	-1.087	0.201117	-5.4048	6.49e-08	1.03e-06
DBP	59.7366	-1.08684	0.385093	-2.82228	0.00476842	0.0182662
HDAC11	98.0166	-1.08588	0.347595	-3.12397	0.00178426	0.00801809
RPS14	17211.4	-1.08564	0.181529	-5.98051	2.22e-09	4.95e-08
POLD1	214.627	-1.08513	0.199171	-5.44824	5.09e-08	8.32e-07
TTN-AS1	58.0689	-1.08423	0.333841	-3.24774	0.00116325	0.00555577
SLC5A10	130.313	-1.08357	0.314391	-3.44655	0.000567788	0.00301481
GAR1	1151.27	-1.08291	0.185394	-5.84116	5.18e-09	1.07e-07
SNORD87	27.1997	-1.08209	0.438025	-2.47039	0.0134966	0.0429149
SNAPC2	369.758	-1.0815	0.25566	-4.23021	2.33e-05	0.000195313
NR1H2	267.673	-1.08145	0.327961	-3.29749	0.000975523	0.0047917
CCBL1	242.159	-1.08138	0.263738	-4.10021	4.13e-05	0.000323409
MIR4284	95.8557	-1.08041	0.345845	-3.12398	0.00178422	0.00801809
GINS2	1034.89	-1.08027	0.203895	-5.29815	1.17e-07	1.77e-06
EMP3	31226	-1.07879	0.130429	-8.27113	1.33e-16	1.02e-14
H1FX-AS1	155.355	-1.07844	0.241965	-4.45702	8.31e-06	7.95e-05
STK32C	39.365	-1.07791	0.355926	-3.02846	0.00245805	0.0104975
DCXR	177.959	-1.07751	0.256969	-4.19314	2.75e-05	0.000225916
CD68	371.136	-1.07698	0.233032	-4.62158	3.81e-06	4e-05
ARMC7	63.5014	-1.07684	0.409955	-2.62672	0.00862114	0.0296643
DUSP1	1862.34	-1.07584	0.179512	-5.99315	2.06e-09	4.6e-08
S100A3	534.021	-1.07529	0.174388	-6.16606	7e-10	1.73e-08
RPS5	2323.83	-1.07526	0.138766	-7.74878	9.28e-15	5.58e-13
PVRL2	959.494	-1.07459	0.269229	-3.99135	6.57e-05	0.000480527
BCAR1	477.851	-1.07385	0.211039	-5.08841	3.61e-07	4.92e-06
AGPAT9	1465.96	-1.0736	0.150352	-7.14055	9.3e-13	3.93e-11
ZNF17	104.553	-1.07264	0.314708	-3.40836	0.000653547	0.00339169
RNF181	4332.4	-1.07135	0.139997	-7.65265	1.97e-14	1.15e-12
ST3GAL6-AS1	31.6356	-1.06971	0.394865	-2.70905	0.00674769	0.0243386
SYF2	2791.31	-1.06969	0.133653	-8.00346	1.21e-15	8.16e-14
DHX38	471.863	-1.06751	0.193461	-5.51795	3.43e-08	5.83e-07
WNT5B	294.159	-1.06744	0.210416	-5.07299	3.92e-07	5.28e-06
ORMDL2	2014.68	-1.06732	0.144636	-7.37934	1.59e-13	7.63e-12
TRABD2A	134.392	-1.06671	0.296811	-3.59389	0.000325774	0.00189485
CLASRP	129.336	-1.06629	0.293263	-3.63596	0.000276947	0.00165612
MRPL52	951.678	-1.06608	0.207398	-5.14029	2.74e-07	3.84e-06
ASPHD1	50.3705	-1.06594	0.356958	-2.98618	0.00282488	0.0118129
HEATR5A	954.722	-1.06583	0.189417	-5.62691	1.83e-08	3.34e-07
CHMP2A	1943.82	-1.06545	0.164172	-6.48984	8.59e-11	2.62e-09
ATPIF1	3403.95	-1.06475	0.174992	-6.08453	1.17e-09	2.76e-08
PLAC1	41.5226	-1.06473	0.417847	-2.54815	0.0108297	0.0359098
FAM207A	46.9997	-1.0643	0.379793	-2.8023	0.00507393	0.0192302
RDH5	26.7486	-1.06401	0.428482	-2.48322	0.0130202	0.0417425
DUS3L	418.786	-1.06364	0.184978	-5.75009	8.92e-09	1.75e-07
RGS3	1006.64	-1.06342	0.157614	-6.747	1.51e-11	5.19e-10
GAS2L1	646.096	-1.06308	0.180571	-5.88736	3.92e-09	8.36e-08
SYT17	56.8924	-1.06123	0.333913	-3.17815	0.00148217	0.00684887
TNFRSF25	27.0136	-1.06079	0.428049	-2.47819	0.0132051	0.0421837
LONP1	220.428	-1.06024	0.28524	-3.717	0.0002016	0.00126935
AGPAT6	839.639	-1.06022	0.186989	-5.66997	1.43e-08	2.67e-07
RALGDS	319.124	-1.06012	0.238894	-4.43761	9.1e-06	8.62e-05
CDC34	663.967	-1.05907	0.205234	-5.16027	2.47e-07	3.48e-06
C19orf25	155.439	-1.05855	0.242987	-4.35641	1.32e-05	0.000119913
AGER	164.685	-1.05748	0.266807	-3.96347	7.39e-05	0.000531104
NRP2	692.48	-1.05646	0.149448	-7.06908	1.56e-12	6.39e-11
REC8	49.8004	-1.05587	0.418224	-2.52464	0.0115815	0.037956
CD151	773.469	-1.05546	0.184946	-5.70685	1.15e-08	2.22e-07
EML3	74.3325	-1.0542	0.290601	-3.62767	0.000285995	0.00170135
PNPLA6	163.531	-1.05402	0.262675	-4.01265	6e-05	0.000444413
RPS27	2267.16	-1.05192	0.190432	-5.52388	3.32e-08	5.67e-07
C17orf53	227.478	-1.05161	0.266699	-3.94305	8.05e-05	0.000572545
FBXO48	106.884	-1.0516	0.296234	-3.5499	0.000385374	0.00217614
NDUFB9	1561.42	-1.05111	0.171372	-6.13351	8.6e-10	2.09e-08
FAM63A	66.011	-1.05109	0.296	-3.55096	0.000383825	0.00217154
SMAD7	173.463	-1.05073	0.235914	-4.45385	8.43e-06	8.05e-05
MICALL2	65.5126	-1.05058	0.295974	-3.54956	0.000385876	0.00217777
NDUFB10	716.805	-1.05	0.184904	-5.6786	1.36e-08	2.56e-07
TFPT	184.938	-1.04983	0.263565	-3.98319	6.8e-05	0.000495084
SH3GL1	199.919	-1.04932	0.207988	-5.04509	4.53e-07	6.01e-06
PYROXD2	178.827	-1.04902	0.264171	-3.97098	7.16e-05	0.000517183
C1orf159	84.7795	-1.04876	0.369853	-2.83562	0.00457371	0.0176255
EIF3F	3158.34	-1.04813	0.164465	-6.37297	1.85e-10	5.19e-09
SLC30A1	507.1	-1.04795	0.196784	-5.3254	1.01e-07	1.55e-06
HEY1	149.815	-1.04754	0.302168	-3.46674	0.000526812	0.00283378
COX6B1	4154.62	-1.04747	0.171182	-6.11902	9.42e-10	2.27e-08
KAT2A	398.766	-1.04725	0.21973	-4.7661	1.88e-06	2.13e-05
TICAM1	76.1216	-1.04554	0.362189	-2.88672	0.00389283	0.015412
MAPK12	57.3455	-1.04541	0.364276	-2.86983	0.00410699	0.0161169
REEP2	51.7213	-1.04522	0.34943	-2.99121	0.0027787	0.011641
DGKD	1088.93	-1.04427	0.188819	-5.53053	3.19e-08	5.49e-07
MRM1	40.2526	-1.044	0.422659	-2.47009	0.0135079	0.0429377
ITPK1	604.724	-1.04397	0.239641	-4.3564	1.32e-05	0.000119913
LRP10	617.481	-1.04264	0.162637	-6.4108	1.45e-10	4.19e-09
RPS16	6572.29	-1.04253	0.180754	-5.76769	8.04e-09	1.59e-07
ST6GALNAC4	131.423	-1.04224	0.297853	-3.49918	0.000466696	0.00256089
LOC100505592	51.5668	-1.04222	0.383886	-2.71493	0.00662903	0.0239824
CYTH1	829.197	-1.04203	0.241546	-4.31402	1.6e-05	0.000140248
TIMM8A	947.293	-1.04134	0.165846	-6.27895	3.41e-10	9.01e-09
C19orf52	633.972	-1.04122	0.149386	-6.96998	3.17e-12	1.22e-10
NCKIPSD	205.675	-1.04117	0.250697	-4.15309	3.28e-05	0.00026436
CRELD1	188.081	-1.04107	0.285152	-3.65092	0.000261299	0.00157544
CUTA	6942.6	-1.04083	0.12884	-8.07847	6.56e-16	4.6e-14
TMEM208	2830.79	-1.03914	0.142134	-7.31096	2.65e-13	1.23e-11
NCBP2-AS2	1167.57	-1.03903	0.17924	-5.79684	6.76e-09	1.36e-07
CDK11A	57.5042	-1.03698	0.328264	-3.15897	0.00158329	0.0072473
WDR46	505.513	-1.03696	0.268724	-3.85884	0.000113927	0.000775706
TOLLIP	700.774	-1.0369	0.162119	-6.39592	1.6e-10	4.55e-09
MYO18A	62.1528	-1.03661	0.318137	-3.25837	0.00112053	0.00537735
NDUFA6	2899.86	-1.03608	0.16789	-6.17115	6.78e-10	1.68e-08
ANAPC11	6586.22	-1.03566	0.12981	-7.97829	1.48e-15	9.93e-14
TMEM115	336.583	-1.03502	0.262428	-3.94402	8.01e-05	0.000570468
NLRX1	50.5402	-1.03501	0.401098	-2.58045	0.00986724	0.0331772
RPS6KA4	111.345	-1.03463	0.289048	-3.57944	0.000344334	0.00198589
RPUSD2	254.952	-1.03459	0.278972	-3.70858	0.000208424	0.00130464
ILVBL	733.058	-1.03416	0.178548	-5.79209	6.95e-09	1.39e-07
MRPL40	1166.4	-1.03246	0.139683	-7.39144	1.45e-13	7.03e-12
LAMA5	1274.41	-1.03186	0.14697	-7.02091	2.2e-12	8.72e-11
SIVA1	5049.21	-1.03175	0.163595	-6.3067	2.85e-10	7.63e-09
NMB	51.1722	-1.03128	0.381549	-2.70288	0.00687416	0.0247009
TRMT1	458.247	-1.03117	0.216579	-4.76117	1.92e-06	2.17e-05
PFDN5	1695.98	-1.03081	0.170718	-6.03806	1.56e-09	3.58e-08
CTC1	291.115	-1.0297	0.270924	-3.80069	0.000144292	0.000949452
TMEM102	38.3148	-1.02922	0.397787	-2.58736	0.00967141	0.0326144
LINC00152	5588.28	-1.02856	0.189563	-5.42593	5.77e-08	9.28e-07
CXCL2	422.259	-1.02819	0.270587	-3.79985	0.000144783	0.000952292
TRAPPC1	3840.3	-1.0273	0.173211	-5.93093	3.01e-09	6.58e-08
VARS2	101.755	-1.0269	0.323471	-3.17462	0.00150034	0.00692284
AARS	686.628	-1.02613	0.197501	-5.19556	2.04e-07	2.94e-06
HMOX2	610.889	-1.0255	0.260836	-3.93158	8.44e-05	0.000596336
NUDC	2889.1	-1.02541	0.16638	-6.16307	7.13e-10	1.76e-08
DMAP1	409.935	-1.02499	0.189558	-5.40723	6.4e-08	1.02e-06
UBE2S	5025.82	-1.02463	0.164742	-6.2196	4.98e-10	1.27e-08
DEAF1	235.473	-1.02457	0.264381	-3.87533	0.000106479	0.00073276
PLA2G15	233.519	-1.0241	0.229922	-4.4541	8.42e-06	8.05e-05
ACOX3	101.223	-1.02294	0.280471	-3.64721	0.0002651	0.00159417
KHK	45.6574	-1.02193	0.398924	-2.56172	0.0104154	0.0347079
DDX11	513.434	-1.02136	0.161302	-6.332	2.42e-10	6.62e-09
LOC101243545	543.755	-1.02007	0.226154	-4.51049	6.47e-06	6.4e-05
CIC	115.123	-1.01967	0.262568	-3.88345	0.000102985	0.000710696
PPP1R14B	7768.38	-1.01906	0.117612	-8.66461	4.53e-18	4.26e-16
RPSA	7103.5	-1.01792	0.214463	-4.74638	2.07e-06	2.32e-05
MUS81	184.837	-1.01735	0.247277	-4.1142	3.89e-05	0.000306961
CXCL3	179.351	-1.01731	0.27819	-3.65689	0.000255292	0.00154619
IMPDH2	2056.35	-1.01703	0.16507	-6.16118	7.22e-10	1.77e-08
OGFR	380.836	-1.01646	0.235429	-4.3175	1.58e-05	0.000138552
RPL18	7896.15	-1.01612	0.150055	-6.77165	1.27e-11	4.47e-10
ARRDC1	164.263	-1.01592	0.315165	-3.22346	0.00126651	0.0059884
CWC15	8839.83	-1.01589	0.139914	-7.26082	3.85e-13	1.71e-11
FAM225A	355.052	-1.01577	0.173504	-5.85444	4.79e-09	1e-07
GMPPB	118.401	-1.01535	0.303175	-3.34905	0.000810904	0.00406642
ZMAT5	89.1835	-1.01495	0.353323	-2.87258	0.00407134	0.0159887
TMPPE	122.36	-1.0148	0.293619	-3.45619	0.00054787	0.00292962
MED15	919.847	-1.01443	0.145531	-6.97053	3.16e-12	1.22e-10
FLRT3	82.672	-1.01436	0.39869	-2.54424	0.0109515	0.036219
RPL7A	9408.99	-1.01377	0.176745	-5.7358	9.71e-09	1.88e-07
C1orf86	148.968	-1.01288	0.274037	-3.69615	0.00021889	0.00136166
CDC26	1582.25	-1.01255	0.179254	-5.6487	1.62e-08	3e-07
C9orf37	258.728	-1.01254	0.228526	-4.43077	9.39e-06	8.86e-05
PLK3	120.319	-1.01242	0.272116	-3.72055	0.00019879	0.00125362
NDUFB2	1133.76	-1.01196	0.155083	-6.52527	6.79e-11	2.09e-09
FAM3A	128.435	-1.01143	0.279374	-3.62034	0.000294213	0.00174034
PKN3	181.289	-1.01141	0.222658	-4.54242	5.56e-06	5.6e-05
CHID1	347.239	-1.01135	0.232943	-4.34161	1.41e-05	0.000126991
PLIN3	2357.77	-1.01058	0.168007	-6.01514	1.8e-09	4.08e-08
ORMDL3	399.303	-1.01025	0.257177	-3.92824	8.56e-05	0.000604137
SUPT5H	1331.08	-1.00951	0.175236	-5.76089	8.37e-09	1.64e-07
CSF1	653.246	-1.00804	0.176907	-5.69811	1.21e-08	2.31e-07
ZNF581	123.877	-1.00735	0.366865	-2.74584	0.00603559	0.0221747
ZNF521	419.091	-1.007	0.201801	-4.99006	6.04e-07	7.75e-06
BYSL	888.548	-1.00664	0.185281	-5.43305	5.54e-08	8.94e-07
GSN	1217.52	-1.00619	0.224612	-4.47967	7.48e-06	7.23e-05
LSMEM1	129.871	-1.00609	0.298728	-3.36792	0.000757377	0.00383149
GTF3C5	557.828	-1.00591	0.19002	-5.29368	1.2e-07	1.8e-06
POLR2E	921.03	-1.00556	0.27065	-3.71536	0.000202915	0.00127563
RFX1	109.145	-1.0053	0.29193	-3.44365	0.000573927	0.00304539
LOC101927642	56.7914	-1.00474	0.337407	-2.97784	0.00290291	0.0120857
ZNF836	89.1545	-1.00459	0.327838	-3.06427	0.00218201	0.00950826
CLK3	502.942	-1.0045	0.18956	-5.29913	1.16e-07	1.76e-06
HIGD2A	2884.06	-1.00366	0.142229	-7.05664	1.71e-12	6.92e-11
C17orf62	220.38	-1.00353	0.227799	-4.40535	1.06e-05	9.82e-05
STK11IP	412.009	-1.00245	0.237219	-4.22583	2.38e-05	0.00019884
TTC39C	1788.38	-1.00233	0.171453	-5.84609	5.03e-09	1.05e-07
PVRL1	151.024	-1.00215	0.216456	-4.62981	3.66e-06	3.85e-05
ATOX1	1495.86	-1.0021	0.184126	-5.44245	5.26e-08	8.57e-07
C11orf45	92.9627	-1.00207	0.287824	-3.48152	0.000498578	0.00270455
RPL23AP53	97.4122	-1.00143	0.28025	-3.57336	0.000352432	0.00202387
ZBTB33	433.055	1.00166	0.25253	3.96651	7.29e-05	0.000525787
CTSK	91.1907	1.00194	0.328227	3.05257	0.0022689	0.00983352
PCLO	166.643	1.0022	0.284746	3.51963	0.000432143	0.00239542
UVSSA	226.358	1.00351	0.254762	3.939	8.18e-05	0.000581246
C16orf70	223.897	1.00359	0.286816	3.49905	0.000466915	0.00256089
GABARAPL1	279.89	1.0038	0.226405	4.43366	9.26e-06	8.77e-05
LMAN1	1375.18	1.00458	0.169007	5.94405	2.78e-09	6.12e-08
GPR137B	260.809	1.00466	0.267789	3.75167	0.000175659	0.00112767
PDE4D	787.869	1.00475	0.176928	5.67887	1.36e-08	2.56e-07
ARL5A	2728.47	1.00495	0.189145	5.3131	1.08e-07	1.64e-06
DPM1	2254.61	1.00524	0.178133	5.64319	1.67e-08	3.08e-07
FLVCR1	396.466	1.00539	0.23281	4.3185	1.57e-05	0.000138108
ODF2	657.941	1.00578	0.174539	5.76248	8.29e-09	1.64e-07
BMS1P6	37.6293	1.00633	0.411176	2.44745	0.0143869	0.045266
CAPS2	68.3715	1.00687	0.356386	2.82523	0.00472473	0.0181162
IFIT3	1525.14	1.00702	0.178816	5.63158	1.79e-08	3.27e-07
PXYLP1	55.8105	1.00717	0.399834	2.51897	0.0117699	0.0383908
FGD1	91.7902	1.00814	0.338261	2.98037	0.00287902	0.0120018
NNT-AS1	469.39	1.00974	0.19993	5.05044	4.41e-07	5.87e-06
GPM6B	110.378	1.00979	0.393393	2.56688	0.010262	0.0342891
ADSS	878.704	1.00992	0.209975	4.80972	1.51e-06	1.75e-05
ZFHX4	276.855	1.01177	0.209437	4.83089	1.36e-06	1.59e-05
TST	72.7103	1.01308	0.317477	3.19103	0.00141768	0.00659448
ZNF506	497.339	1.01354	0.171962	5.89396	3.77e-09	8.05e-08
FAM117B	49.4746	1.01357	0.410589	2.46856	0.0135658	0.0430449
PRKAA2	403.202	1.01601	0.236749	4.29149	1.77e-05	0.000153425
DOCK1	560.002	1.01739	0.235919	4.31245	1.61e-05	0.000141091
ARAP2	247.1	1.01821	0.280012	3.63632	0.000276559	0.00165503
VWDE	80.8589	1.01993	0.336898	3.0274	0.00246667	0.0105287
PCF11	341.48	1.02047	0.195482	5.22027	1.79e-07	2.62e-06
NAV1	943.782	1.02261	0.155653	6.56979	5.04e-11	1.59e-09
KLF5	613.056	1.02352	0.191874	5.33431	9.59e-08	1.49e-06
TMEM156	195.582	1.02384	0.305163	3.35507	0.00079346	0.00398516
LOXL1	131.478	1.02517	0.388878	2.63623	0.00838337	0.0290077
LIF	374.924	1.0265	0.178183	5.76093	8.37e-09	1.64e-07
FZD6	2429.85	1.02697	0.168447	6.09667	1.08e-09	2.58e-08
PCBP2	1440.76	1.02715	0.158389	6.48499	8.87e-11	2.69e-09
ICA1	218.017	1.02747	0.280748	3.65975	0.000252462	0.00153136
CTPS2	91.2199	1.0289	0.324958	3.16626	0.00154413	0.00710245
NPTN	2608.02	1.02976	0.16843	6.11391	9.72e-10	2.34e-08
RBM26-AS1	105.276	1.03039	0.321765	3.20232	0.00136326	0.00638385
SKIL	1062.77	1.03049	0.177261	5.81342	6.12e-09	1.24e-07
YAE1D1	800.443	1.03057	0.285775	3.60624	0.000310669	0.0018185
RELL1	435.326	1.03067	0.184632	5.58228	2.37e-08	4.2e-07
OSR2	70.7228	1.03204	0.329381	3.13326	0.00172876	0.00779805
ACSS3	110.907	1.03224	0.25449	4.05611	4.99e-05	0.000380004
ACVR1B	119.288	1.0324	0.286924	3.59815	0.000320483	0.0018671
RAB29	297.247	1.03291	0.254442	4.05952	4.92e-05	0.000375392
TTF2	512.383	1.03342	0.199583	5.17792	2.24e-07	3.21e-06
L3HYPDH	373.385	1.03343	0.191931	5.38439	7.27e-08	1.15e-06
MTRF1	165.518	1.03344	0.311444	3.31823	0.000905885	0.00448362
CMTM4	110.66	1.03373	0.280127	3.69023	0.000224055	0.00138663
FAM196A	114.224	1.03446	0.294036	3.51814	0.00043458	0.00240448
OSTM1	463.93	1.0366	0.210936	4.91427	8.91e-07	1.1e-05
CD3EAP	345.176	1.0366	0.229402	4.51873	6.22e-06	6.18e-05
ROBO1	597.38	1.03671	0.212337	4.88237	1.05e-06	1.27e-05
HLA-DMA	198.584	1.03769	0.24236	4.28162	1.86e-05	0.000159534
UROS	470.726	1.03797	0.232106	4.47194	7.75e-06	7.48e-05
IGF1	56.3777	1.03888	0.354308	2.93213	0.00336649	0.0136134
PRKAG2	911.002	1.03949	0.206455	5.03493	4.78e-07	6.3e-06
APH1A	647.832	1.04066	0.209448	4.96857	6.74e-07	8.56e-06
LRP12	1488.96	1.04113	0.182665	5.69965	1.2e-08	2.3e-07
TUBGCP4	281.186	1.04237	0.268658	3.8799	0.000104498	0.000720365
ANXA7	2070.06	1.04242	0.134736	7.73677	1.02e-14	6.09e-13
SLC35F2	2713.18	1.04272	0.185082	5.63382	1.76e-08	3.23e-07
EDEM1	544.972	1.04278	0.169171	6.16407	7.09e-10	1.75e-08
ZBTB46	44.3825	1.0429	0.358783	2.90676	0.00365197	0.0145988
FBXO5	1438.66	1.04487	0.163149	6.40441	1.51e-10	4.34e-09
DPH6	172.269	1.04526	0.299132	3.49429	0.000475323	0.00260124
METAP1D	196.177	1.04635	0.247374	4.22984	2.34e-05	0.000195531
ADCY9	77.6546	1.04766	0.325291	3.22068	0.00127885	0.00603612
KCNQ5-IT1	143.553	1.04878	0.333221	3.14741	0.00164725	0.00748462
SLC39A10	1747.12	1.04973	0.145346	7.22228	5.11e-13	2.24e-11
SLC2A13	131.49	1.04983	0.3009	3.48898	0.000484865	0.00264445
ZNF217	1196.66	1.05193	0.209806	5.01383	5.34e-07	6.95e-06
PAM	827.538	1.05233	0.193444	5.43995	5.33e-08	8.65e-07
KLHL5	1514.58	1.0527	0.197781	5.32254	1.02e-07	1.57e-06
AIG1	733.621	1.05372	0.195808	5.3814	7.39e-08	1.17e-06
XRCC6BP1	272.077	1.05581	0.25453	4.14807	3.35e-05	0.000269133
C14orf37	42.2897	1.05599	0.371399	2.84328	0.00446519	0.0172777
MOXD1	58.4706	1.05638	0.393868	2.68207	0.00731674	0.0260234
HYLS1	1354.07	1.05699	0.20833	5.07362	3.9e-07	5.27e-06
DNMT3B	162.467	1.05717	0.258559	4.08869	4.34e-05	0.000336877
TMPO-AS1	34.5403	1.05995	0.419038	2.52947	0.0114234	0.037476
ALDH1A3	92.8006	1.06028	0.381409	2.77991	0.00543743	0.0203628
MTR	450.155	1.06151	0.235397	4.50946	6.5e-06	6.42e-05
GPCPD1	476.035	1.06167	0.212687	4.99171	5.98e-07	7.7e-06
GOLPH3	2847.09	1.06273	0.16215	6.55395	5.6e-11	1.75e-09
SNAP23	636.484	1.06317	0.220595	4.81956	1.44e-06	1.67e-05
PLSCR4	195.691	1.06549	0.25372	4.19946	2.68e-05	0.000220382
MIR21	125.743	1.06592	0.304458	3.50105	0.000463429	0.0025483
GXYLT2	96.6176	1.06688	0.405646	2.63007	0.0085367	0.0294269
ZNF717	196.386	1.06703	0.269083	3.96545	7.33e-05	0.000527654
ITPR2	264.287	1.0673	0.301698	3.53766	0.000403688	0.00226556
LIMCH1	737.081	1.06745	0.196146	5.44211	5.27e-08	8.57e-07
TSHR	50.3161	1.06831	0.429501	2.48733	0.0128705	0.0413452
F2RL1	1922.06	1.069	0.175826	6.07991	1.2e-09	2.82e-08
COA1	2665.27	1.06902	0.175779	6.08159	1.19e-09	2.8e-08
MAP3K10	52.3258	1.06962	0.4006	2.67004	0.00758432	0.0267441
NLRP2	36.8341	1.06987	0.42674	2.50708	0.0121735	0.0395171
IL17RD	322.261	1.07052	0.230679	4.64073	3.47e-06	3.67e-05
RNF2	546.127	1.07156	0.270533	3.96093	7.47e-05	0.000536207
HIF1A	2122.26	1.07156	0.228523	4.68908	2.74e-06	2.98e-05
GALC	215.354	1.07186	0.32478	3.30025	0.000965974	0.0047506
DESI2	1989.81	1.07186	0.154785	6.92482	4.37e-12	1.62e-10
GPR137C	107.347	1.07346	0.349603	3.0705	0.00213697	0.00934912
MTRR	747.072	1.0747	0.178681	6.01465	1.8e-09	4.09e-08
ARV1	263.305	1.07528	0.348937	3.08158	0.00205907	0.0090685
CDK8	52.5303	1.07595	0.393698	2.73293	0.00627735	0.0229204
PTPN14	8222.92	1.07646	0.155888	6.90535	5.01e-12	1.85e-10
CEP112	83.4006	1.07692	0.363321	2.9641	0.0030357	0.0125249
QPCT	163.393	1.07854	0.292368	3.68896	0.000225172	0.00139104
ABCA1	195.87	1.07917	0.244443	4.4148	1.01e-05	9.44e-05
ADIPOR1	1207.21	1.08013	0.175803	6.144	8.05e-10	1.97e-08
MAPK8	1616.48	1.08015	0.155114	6.96358	3.32e-12	1.26e-10
EFNA4	66.5069	1.08057	0.356231	3.03334	0.00241862	0.0103594
HIATL1	2602.4	1.08069	0.18682	5.78465	7.27e-09	1.45e-07
CYB5A	1448.81	1.08339	0.188763	5.73942	9.5e-09	1.85e-07
DNAH5	79.368	1.08481	0.392586	2.76325	0.00572281	0.0212433
SSPN	136.487	1.08484	0.254696	4.25934	2.05e-05	0.000174061
TUBGCP5	175.818	1.08683	0.256972	4.22937	2.34e-05	0.000195839
CCSAP	337.548	1.08737	0.225098	4.83063	1.36e-06	1.59e-05
NRXN3	136.665	1.08829	0.332601	3.27207	0.00106762	0.00517603
SMARCA1	742.246	1.08886	0.234286	4.64757	3.36e-06	3.57e-05
C17orf58	258.999	1.08922	0.23448	4.64526	3.4e-06	3.6e-05
ZNF286B	104.869	1.09059	0.293048	3.72154	0.00019801	0.00124972
PPAPDC1A	1324.98	1.0916	0.201743	5.41082	6.27e-08	1e-06
LINC00707	50.1968	1.09542	0.365902	2.99376	0.00275559	0.0115532
HRSP12	420.566	1.09592	0.225852	4.85238	1.22e-06	1.45e-05
KIAA1211	94.4348	1.09683	0.347703	3.15449	0.00160777	0.00733636
NT5DC3	1807.74	1.09693	0.162519	6.74956	1.48e-11	5.11e-10
GRIK1	83.773	1.0974	0.321451	3.4139	0.000640403	0.00333966
OSMR	457.682	1.09917	0.212524	5.17201	2.32e-07	3.29e-06
ZNF681	43.9654	1.09977	0.413811	2.65766	0.00786846	0.0275735
PPARGC1B	54.6249	1.09979	0.426571	2.57821	0.00993149	0.0333374
TOM1L1	155.37	1.09981	0.275006	3.99923	6.35e-05	0.000466508
DHCR7	307.049	1.10039	0.194636	5.65355	1.57e-08	2.92e-07
SP4	235.539	1.10097	0.246403	4.46816	7.89e-06	7.6e-05
CYP27C1	32.7828	1.10129	0.41982	2.62324	0.00870991	0.0299057
DTWD2	112.938	1.10179	0.266352	4.13662	3.52e-05	0.000281512
CDH24	64.5786	1.10229	0.313558	3.51544	0.000439027	0.00242491
TJP2	1766.61	1.10325	0.147436	7.4829	7.27e-14	3.74e-12
RFX3	277.056	1.10585	0.196018	5.64154	1.69e-08	3.11e-07
EYA4	135.313	1.10613	0.407559	2.71403	0.00664705	0.0240353
KIF16B	65.377	1.10688	0.416493	2.65763	0.00786932	0.0275735
CDK2AP1	3529.98	1.10728	0.258143	4.2894	1.79e-05	0.000154653
F3	1394.9	1.10741	0.174628	6.34153	2.27e-10	6.27e-09
FAM155A-IT1	54.409	1.10797	0.440688	2.51417	0.0119312	0.0388547
KIF14	1410.61	1.10811	0.209728	5.28359	1.27e-07	1.9e-06
MID1	830.577	1.10826	0.186901	5.92966	3.04e-09	6.62e-08
AKAP7	94.6134	1.10882	0.311643	3.558	0.000373696	0.00212697
PFKFB2	91.7905	1.10901	0.314461	3.52669	0.000420787	0.00234189
PGF	225.167	1.10994	0.313202	3.54386	0.000394318	0.00221762
ZNF124	52.325	1.11068	0.438627	2.53217	0.0113359	0.0372497
NALCN	87.0482	1.11341	0.335458	3.31908	0.000903135	0.00447307
FAM221A	199.675	1.1145	0.338315	3.29426	0.000986829	0.00484131
PDE5A	125.803	1.11475	0.27327	4.07931	4.52e-05	0.000348633
SPG21	3048.27	1.11492	0.155626	7.16415	7.83e-13	3.33e-11
SUCLG2-AS1	167.289	1.11737	0.315946	3.53657	0.000405361	0.00227036
TRPC1	158.616	1.11813	0.268375	4.16628	3.1e-05	0.000250905
DNAJC22	43.5991	1.11932	0.415895	2.69136	0.00711623	0.0254228
SMIM19	186.033	1.12161	0.239438	4.68434	2.81e-06	3.04e-05
PSPH	621.304	1.12224	0.159958	7.01583	2.29e-12	9.02e-11
ZNF703	26.156	1.12305	0.444109	2.52876	0.0114466	0.0375369
C11orf63	97.9834	1.1234	0.275079	4.08393	4.43e-05	0.000342833
EIF2AK1	1323.41	1.12345	0.144252	7.78812	6.8e-15	4.15e-13
KIAA1467	96.415	1.12434	0.425612	2.64169	0.00824928	0.0286631
SRP9	6007.64	1.12457	0.138784	8.10305	5.36e-16	3.83e-14
MAN1A1	233.988	1.12509	0.268895	4.18412	2.86e-05	0.000234482
ME2	334.515	1.12567	0.240534	4.67989	2.87e-06	3.1e-05
LY96	245.545	1.1269	0.259466	4.34317	1.4e-05	0.000126231
IRS1	714.079	1.12879	0.151717	7.44011	1.01e-13	4.99e-12
ZNF519	266.085	1.12909	0.302413	3.7336	0.000188764	0.00119906
YIPF6	2741.11	1.12935	0.204435	5.52427	3.31e-08	5.67e-07
WNT3	77.9214	1.12963	0.375986	3.00444	0.00266068	0.0112463
EXPH5	201.054	1.12993	0.257042	4.39591	1.1e-05	0.000102005
GPR98	127.1	1.1308	0.327701	3.45071	0.000559106	0.00297658
LACTB2	445.469	1.13111	0.299027	3.78265	0.000155166	0.00101133
TMED7	1829.4	1.13115	0.178226	6.34672	2.2e-10	6.08e-09
HGSNAT	216.417	1.13165	0.272695	4.14988	3.33e-05	0.000267156
FBXL5	716.45	1.13254	0.161925	6.99421	2.67e-12	1.04e-10
TAF9B	344.904	1.1358	0.194155	5.84999	4.92e-09	1.03e-07
SOAT1	2547.49	1.13596	0.184028	6.17279	6.71e-10	1.67e-08
KLHL7	1041.11	1.1377	0.159851	7.11726	1.1e-12	4.6e-11
IFT81	360.067	1.13969	0.192528	5.9196	3.23e-09	6.98e-08
C16orf52	532.585	1.14028	0.175425	6.50008	8.03e-11	2.45e-09
FKBP9	579.035	1.14061	0.203686	5.59983	2.15e-08	3.82e-07
WWC3	733.918	1.1428	0.206461	5.53522	3.11e-08	5.35e-07
CD46	3952.52	1.14472	0.183911	6.22431	4.84e-10	1.24e-08
LCA5	97.3148	1.14518	0.328806	3.48285	0.000496098	0.00269291
UPRT	190.872	1.14521	0.351218	3.26068	0.00111147	0.00535305
SDHC	1282.83	1.14633	0.224265	5.11151	3.2e-07	4.41e-06
NEK11	154.472	1.14637	0.266024	4.30927	1.64e-05	0.000142747
ALG8	1458.63	1.14714	0.28148	4.07539	4.59e-05	0.00035355
KCTD12	787.288	1.14812	0.20947	5.48107	4.23e-08	7.03e-07
TMCC1	194.7	1.1482	0.252122	4.55413	5.26e-06	5.35e-05
PRTG	298.443	1.14932	0.273466	4.20279	2.64e-05	0.000217387
KLHL24	491.333	1.14946	0.191248	6.01032	1.85e-09	4.19e-08
ACSL1	126.024	1.14947	0.329763	3.48574	0.000490776	0.00267158
LPGAT1	611.154	1.14958	0.193606	5.93773	2.89e-09	6.35e-08
ZFAND4	123.612	1.14994	0.285064	4.03396	5.48e-05	0.000411349
FAM84B	971.688	1.15015	0.23413	4.91245	8.99e-07	1.11e-05
ENAH	1630.12	1.15059	0.171245	6.71895	1.83e-11	6.18e-10
LZTFL1	361.664	1.15287	0.210918	5.46596	4.6e-08	7.59e-07
IL7R	153.261	1.15448	0.298758	3.86427	0.00011142	0.000761222
AHCYL2	106.977	1.15462	0.354847	3.25385	0.00113853	0.00544906
PDK3	227.3	1.15574	0.231141	5.00015	5.73e-07	7.4e-06
TGIF1	1544.25	1.15589	0.261512	4.42003	9.87e-06	9.23e-05
STRADB	323.601	1.15594	0.303524	3.80841	0.000139862	0.000923332
FAM65C	30.6302	1.15628	0.467881	2.47131	0.0134618	0.0428336
PAPSS1	1174.91	1.15665	0.224192	5.15919	2.48e-07	3.5e-06
TPTE2P5	39.5612	1.15706	0.461466	2.50737	0.0121634	0.0394923
ZNF213-AS1	79.6903	1.15787	0.301638	3.83861	0.000123731	0.000831884
TXK	46.5808	1.15947	0.434099	2.67098	0.00756301	0.0266865
ATP6V1A	1292.2	1.1626	0.164098	7.08483	1.39e-12	5.73e-11
UBQLN1	3696.96	1.16347	0.152739	7.61738	2.59e-14	1.47e-12
FAM84A	116.613	1.16394	0.326883	3.56073	0.000369826	0.00210793
DDX59	187.358	1.16921	0.308203	3.79364	0.000148453	0.000972454
PTCH1	30.7715	1.17151	0.459992	2.54681	0.0108713	0.0360179
VPS41	633.371	1.17535	0.154871	7.58925	3.22e-14	1.79e-12
ANKRD1	1857.3	1.1768	0.185926	6.32939	2.46e-10	6.71e-09
KDELC2	878.524	1.17772	0.174572	6.74636	1.52e-11	5.2e-10
ZNF570	34.2618	1.17826	0.421234	2.79716	0.00515544	0.0195023
MAT2A	1309.22	1.18032	0.257637	4.58133	4.62e-06	4.76e-05
SLC35F5	379.213	1.18081	0.233765	5.05127	4.39e-07	5.85e-06
DDX60	216.292	1.18099	0.253549	4.65785	3.2e-06	3.41e-05
FAM72B	179.231	1.18115	0.28727	4.11162	3.93e-05	0.000309953
ERCC6	74.641	1.18129	0.370155	3.19135	0.0014161	0.00658982
TMED10P1	39.6051	1.18389	0.467889	2.53028	0.0113972	0.0374206
PPM1H	41.0153	1.184	0.428431	2.76357	0.00571729	0.0212326
PHKG1	22.8497	1.18422	0.463776	2.55343	0.0106667	0.0354516
PCDH7	195.255	1.1866	0.29022	4.08862	4.34e-05	0.000336877
FUCA1	152.16	1.18805	0.308877	3.84634	0.000119897	0.000810857
ATP7A	164.423	1.18842	0.305867	3.8854	0.00010216	0.000706675
LTBP2	258.969	1.18875	0.271076	4.3853	1.16e-05	0.000106613
PLEKHA1	1093.83	1.18878	0.13558	8.76809	1.82e-18	1.86e-16
LINC00997	118.797	1.19074	0.33944	3.50795	0.000451581	0.00248827
LPCAT2	360.407	1.19093	0.265595	4.48401	7.33e-06	7.11e-05
PACRGL	323.932	1.19102	0.201204	5.91945	3.23e-09	6.98e-08
INSIG1	989.427	1.19103	0.156607	7.60521	2.84e-14	1.6e-12
PLAC4	93.2018	1.19217	0.324412	3.67487	0.000237969	0.00145554
EFCAB13	252.892	1.19388	0.236182	5.05491	4.31e-07	5.76e-06
THRIL	62.6896	1.19394	0.473747	2.5202	0.0117287	0.0383051
UBL3	454.619	1.19766	0.206179	5.80882	6.29e-09	1.27e-07
SPINK5	23.5217	1.19896	0.46068	2.6026	0.00925198	0.0314909
GALK2	167.75	1.20108	0.322166	3.72814	0.0001929	0.0012232
ZBED6CL	33.1476	1.2014	0.484696	2.47867	0.0131875	0.0421556
SLC33A1	256.053	1.20181	0.284787	4.22002	2.44e-05	0.000203504
SMAD9	45.3439	1.20279	0.487101	2.46929	0.0135383	0.0429861
SLC7A5	1153.21	1.20398	0.146642	8.21033	2.21e-16	1.67e-14
TMEM128	964.097	1.20471	0.170779	7.05419	1.74e-12	7.01e-11
PARP16	36.724	1.20491	0.486569	2.47634	0.0132738	0.0423527
PAX6	59.9502	1.20495	0.386762	3.11548	0.00183645	0.0082416
TNFSF10	1755.47	1.20518	0.204044	5.90647	3.5e-09	7.5e-08
E2F5	111.135	1.20521	0.376693	3.19946	0.00137687	0.00643633
EXTL2	808.1	1.20587	0.171197	7.04377	1.87e-12	7.51e-11
XIRP2	38.6137	1.20662	0.438173	2.75376	0.00589154	0.021759
LRCH3	200.605	1.20761	0.242459	4.98069	6.34e-07	8.12e-06
FAM201A	35.7233	1.20782	0.469328	2.57351	0.0100672	0.0337119
RP2	409.27	1.20827	0.276904	4.36351	1.28e-05	0.000116477
SRD5A1	547.975	1.2153	0.179567	6.76796	1.31e-11	4.55e-10
ANXA8	33.3165	1.21583	0.462945	2.6263	0.00863177	0.0296746
C4orf47	40.7081	1.21707	0.429433	2.83413	0.00459513	0.0176868
GREB1L	35.5554	1.21869	0.438074	2.78192	0.00540391	0.0202703
PLEKHH1	70.9648	1.21993	0.33091	3.68659	0.000227283	0.00140085
ANKRD20A5P	84.606	1.22039	0.292619	4.17058	3.04e-05	0.000247094
GCA	860.85	1.22087	0.197813	6.17184	6.75e-10	1.68e-08
ANP32A-IT1	60.8439	1.2219	0.448638	2.72358	0.0064579	0.0234676
PANK1	173.351	1.22298	0.260511	4.69454	2.67e-06	2.92e-05
TBC1D8B	28.97	1.22392	0.444787	2.75169	0.00592883	0.0218615
LINC00630	78.5037	1.22532	0.42481	2.8844	0.00392162	0.0155136
SMARCA2	675.773	1.22563	0.176169	6.95713	3.47e-12	1.31e-10
IFIT2	988.027	1.22675	0.145622	8.42424	3.63e-17	3.05e-15
HSD17B3	106.362	1.22714	0.415978	2.95002	0.00317757	0.0129868
KIF20A	1508.66	1.2291	0.141431	8.69046	3.61e-18	3.51e-16
FAM173B	254.285	1.22957	0.208563	5.89544	3.74e-09	7.99e-08
FBXO21	1107.51	1.23175	0.128535	9.58301	9.43e-22	1.46e-19
OGN	41.8087	1.23374	0.474276	2.60132	0.0092867	0.0315689
LSR	64.1026	1.23486	0.342493	3.60549	0.00031156	0.00182106
FLJ45974	74.4835	1.23613	0.335244	3.68725	0.000226693	0.00139829
DYSF	50.9167	1.23619	0.41519	2.97741	0.00290693	0.0120993
CHN2	169.345	1.2363	0.243948	5.06788	4.02e-07	5.4e-06
WASF1	451.826	1.23706	0.268496	4.60736	4.08e-06	4.25e-05
ZNF763	34.8301	1.23712	0.454893	2.71957	0.00653662	0.0237107
BBS9	125.752	1.23751	0.346245	3.57408	0.000351463	0.00202072
HACE1	123.375	1.23829	0.276831	4.47308	7.71e-06	7.44e-05
TM6SF1	52.9271	1.2383	0.343442	3.60555	0.000311488	0.00182106
PDCD1LG2	61.1109	1.23865	0.385447	3.21353	0.00131113	0.00617034
B3GALTL	438.296	1.24052	0.196281	6.32011	2.61e-10	7.07e-09
TMEM67	275.522	1.24061	0.207278	5.98528	2.16e-09	4.82e-08
CBLB	88.9622	1.24213	0.347309	3.57644	0.000348308	0.00200664
EPB41L1	48.4988	1.24282	0.449998	2.76184	0.00574762	0.0213255
LSAMP	61.7973	1.2449	0.35001	3.55676	0.00037546	0.00213399
CLIC6	65.4767	1.2455	0.353395	3.52438	0.000424483	0.00235918
RHNO1	1446.61	1.2457	0.212859	5.85226	4.85e-09	1.02e-07
TMEM206	274.286	1.24579	0.227085	5.48601	4.11e-08	6.84e-07
NLK	239.683	1.24691	0.213842	5.83098	5.51e-09	1.13e-07
ASB7	248.047	1.24703	0.227033	5.49274	3.96e-08	6.62e-07
CPEB4	865.331	1.24706	0.16202	7.69695	1.39e-14	8.2e-13
SYCP2	41.2353	1.24913	0.439535	2.84193	0.00448415	0.0173302
LOC339803	90.3814	1.24929	0.340251	3.67168	0.000240957	0.00147158
CDON	142.511	1.25017	0.293725	4.25627	2.08e-05	0.000175722
TMEM175	36.1654	1.25024	0.483151	2.58769	0.00966226	0.0325903
THAP10	381.025	1.25057	0.244486	5.11508	3.14e-07	4.34e-06
ZNF699	98.1679	1.25076	0.315257	3.96743	7.27e-05	0.000524059
LOC100133315	23.0154	1.25088	0.484728	2.58059	0.00986317	0.0331705
CBR3-AS1	68.4766	1.2509	0.44388	2.8181	0.00483082	0.0184481
SNED1	57.2781	1.25296	0.42907	2.92017	0.00349838	0.0140724
TAS2R5	18.4287	1.25385	0.506172	2.47712	0.0132446	0.0422817
MIR181A1HG	87.1099	1.25483	0.30269	4.14558	3.39e-05	0.000271944
ITGB8	349.574	1.25751	0.235885	5.33103	9.77e-08	1.51e-06
C9orf64	251.453	1.25812	0.212647	5.9165	3.29e-09	7.09e-08
NRIP1	735.393	1.26024	0.180709	6.97384	3.08e-12	1.19e-10
LOC102724508	21.4082	1.26061	0.511578	2.46416	0.0137334	0.0434651
TSC22D2	405.891	1.26071	0.28199	4.47075	7.79e-06	7.51e-05
MESDC1	217.533	1.26085	0.302528	4.16771	3.08e-05	0.000249587
UXS1	432.186	1.26297	0.175676	7.18916	6.52e-13	2.83e-11
PPP1R1C	25.8362	1.26328	0.429535	2.94103	0.00327122	0.013312
LINC00941	131.061	1.26444	0.260633	4.85144	1.23e-06	1.45e-05
TNS3	919.291	1.26549	0.174169	7.26585	3.71e-13	1.65e-11
CLEC2B	583.882	1.26706	0.175088	7.2367	4.6e-13	2.03e-11
PNMAL1	310.478	1.26751	0.212856	5.95476	2.6e-09	5.75e-08
ZNRF2	258.91	1.2697	0.239451	5.30255	1.14e-07	1.73e-06
PTPRB	53.7478	1.27045	0.45022	2.82184	0.00477489	0.0182823
ZNF503	30.7289	1.27171	0.452451	2.8107	0.00494332	0.0187878
DHX32	273.862	1.27427	0.220811	5.77085	7.89e-09	1.56e-07
IL20RA	31.8875	1.27481	0.490385	2.59961	0.00933304	0.0316996
ANGPT1	61.1726	1.27601	0.431951	2.95407	0.00313614	0.0128568
TEAD2	153.557	1.27639	0.251738	5.07032	3.97e-07	5.34e-06
CCDC148	32.6702	1.27726	0.496052	2.57486	0.0100282	0.0336129
ZBTB39	103.91	1.27734	0.299297	4.2678	1.97e-05	0.00016875
KDELR2	7275.77	1.27803	0.145829	8.76387	1.89e-18	1.92e-16
PA2G4P4	27.513	1.27887	0.456382	2.8022	0.00507558	0.0192319
PIP4K2C	249.174	1.28138	0.234141	5.47268	4.43e-08	7.33e-07
MIR4500HG	76.002	1.28346	0.310886	4.1284	3.65e-05	0.000290463
PTGES	305.395	1.28413	0.225032	5.70645	1.15e-08	2.22e-07
LPXN	810.033	1.28434	0.205151	6.26047	3.84e-10	1e-08
TINAGL1	400.629	1.28437	0.2346	5.47475	4.38e-08	7.26e-07
SNRNP40	2039.13	1.29111	0.203024	6.35939	2.03e-10	5.63e-09
BBS10	482.379	1.29177	0.263128	4.9093	9.14e-07	1.12e-05
2019-03-01	78.4854	1.2927	0.361458	3.57634	0.000348439	0.00200668
COX10-AS1	54.4897	1.29408	0.388577	3.3303	0.000867533	0.00431537
BEND3P3	14.5552	1.29651	0.532398	2.43522	0.0148827	0.0465795
CCDC144CP	35.3593	1.29686	0.428924	3.02353	0.00249845	0.0106474
SIAE	122.214	1.29907	0.275623	4.71321	2.44e-06	2.68e-05
C5orf15	1893.75	1.29926	0.162359	8.00236	1.22e-15	8.2e-14
HMOX1	636.203	1.30179	0.490779	2.6525	0.00798974	0.0279284
AMN1	113.099	1.30217	0.290126	4.48828	7.18e-06	7.01e-05
LYRM5	89.1158	1.30373	0.352266	3.70099	0.000214761	0.00133961
TTLL1	41.8282	1.30562	0.435623	2.99714	0.00272529	0.0114561
MALT1	383.689	1.30965	0.215699	6.07167	1.27e-09	2.96e-08
CDC14B	290.305	1.31158	0.204008	6.42906	1.28e-10	3.75e-09
OSER1-AS1	215.185	1.31158	0.248763	5.27243	1.35e-07	2.01e-06
OAT	2037.19	1.31211	0.173501	7.56253	3.95e-14	2.14e-12
SLC7A11	520.181	1.31223	0.206673	6.3493	2.16e-10	5.99e-09
IPPK	29.4683	1.31453	0.444262	2.9589	0.00308736	0.01271
PPARG	352.032	1.31585	0.229376	5.73666	9.66e-09	1.88e-07
ARNT2	50.4334	1.32129	0.350894	3.7655	0.000166215	0.00107478
MKRN3	41.0475	1.3219	0.429499	3.07777	0.00208557	0.00917264
RPN1	835.56	1.32324	0.205449	6.44072	1.19e-10	3.52e-09
TIAM1	247.436	1.32339	0.248419	5.32727	9.97e-08	1.54e-06
NCF2	189.568	1.32553	0.334913	3.95782	7.56e-05	0.000541625
NEO1	63.4303	1.32583	0.365947	3.62302	0.000291187	0.00172521
CRYL1	118.827	1.32593	0.271594	4.88204	1.05e-06	1.27e-05
EVI2B	318.064	1.32817	0.327151	4.0598	4.91e-05	0.000375124
PDIA4	568.432	1.32928	0.185923	7.14964	8.7e-13	3.69e-11
PCDHGA12	35.9649	1.33048	0.405223	3.28334	0.00102586	0.00500377
DHRS3	179.497	1.33118	0.306973	4.33646	1.45e-05	0.000129206
ANK3	300.577	1.33412	0.237703	5.61255	1.99e-08	3.61e-07
AP3B1	712.081	1.33533	0.173987	7.67484	1.66e-14	9.71e-13
BICD1	177.025	1.33565	0.241758	5.52472	3.3e-08	5.66e-07
ALDH2	146.504	1.33707	0.287768	4.64636	3.38e-06	3.58e-05
C2orf27A	104.438	1.33832	0.388293	3.44667	0.000567539	0.00301449
SERTAD4	526.203	1.33912	0.213247	6.27966	3.39e-10	8.98e-09
ZNF117	21.888	1.3394	0.545272	2.45639	0.0140342	0.0443211
RBMS3	1055.96	1.34147	0.199951	6.70903	1.96e-11	6.6e-10
MMD	672.04	1.34483	0.200039	6.72285	1.78e-11	6.03e-10
KLHL11	34.3529	1.34543	0.43937	3.06217	0.00219738	0.00956228
DSP	691.644	1.34584	0.218426	6.16153	7.2e-10	1.77e-08
TMEM133	97.2248	1.34702	0.288773	4.66464	3.09e-06	3.31e-05
TRIM66	81.7364	1.35039	0.425212	3.17581	0.00149421	0.00689852
HSD11B1	21.3382	1.35354	0.550533	2.4586	0.0139479	0.0440834
CCDC92	158.562	1.35422	0.316812	4.27453	1.92e-05	0.000164254
TGFBI	885.059	1.3544	0.181312	7.46997	8.02e-14	4.08e-12
HNRNPA1P33	32.3333	1.35487	0.48045	2.82001	0.0048022	0.0183606
GPR22	38.3781	1.35507	0.477262	2.83926	0.00452182	0.0174506
GSTM3	291.196	1.35551	0.239448	5.66099	1.51e-08	2.8e-07
SLC36A1	209.264	1.35565	0.270476	5.0121	5.38e-07	7e-06
SLC2A12	144.284	1.35795	0.370638	3.66383	0.000248474	0.00150945
ZNF770	1224.95	1.35826	0.22437	6.05367	1.42e-09	3.29e-08
RAB11FIP2	605.869	1.35904	0.220524	6.16277	7.15e-10	1.76e-08
FAM71F2	30.044	1.35925	0.491866	2.76346	0.00571917	0.0212347
SOX4	9294.89	1.3605	0.156302	8.70432	3.19e-18	3.15e-16
SLC38A6	545.379	1.36236	0.264175	5.15704	2.51e-07	3.53e-06
SCG2	194.124	1.3625	0.278228	4.89705	9.73e-07	1.19e-05
RNF182	291.581	1.36348	0.217695	6.26329	3.77e-10	9.84e-09
F2RL3	34.3142	1.36485	0.460572	2.96337	0.00304288	0.0125513
ZDHHC4	1907.12	1.36797	0.185853	7.36053	1.83e-13	8.7e-12
PCMTD2	1115.28	1.36887	0.196492	6.96657	3.25e-12	1.24e-10
FSD2	52.0035	1.36934	0.410332	3.33715	0.00084643	0.00421954
DNAH7	41.9175	1.37002	0.458698	2.98676	0.00281948	0.0117964
MAL2	53.8183	1.37031	0.359552	3.81115	0.000138321	0.00091466
CYFIP2	27.3027	1.37633	0.463889	2.96693	0.00300788	0.012444
RNF180	102.413	1.37696	0.374093	3.68078	0.000232519	0.00142929
SIPA1L2	17.6412	1.3786	0.525752	2.62215	0.00873768	0.0299625
PDE8B	88.3639	1.37992	0.298963	4.61571	3.92e-06	4.1e-05
CPE	215.851	1.37992	0.270833	5.09511	3.49e-07	4.77e-06
ADAMTS16	77.3538	1.38146	0.425484	3.24679	0.00116715	0.00557274
FANK1	43.288	1.38289	0.446225	3.09909	0.00194115	0.00862244
SCPEP1	334.21	1.38304	0.200381	6.90202	5.13e-12	1.89e-10
IFT80	247.862	1.38347	0.252879	5.47087	4.48e-08	7.39e-07
ABHD17B	243.628	1.3844	0.262293	5.27808	1.31e-07	1.96e-06
LOC100506127	21.1422	1.38462	0.50933	2.71851	0.00655766	0.0237564
KDM5B	542.51	1.38729	0.169195	8.19936	2.42e-16	1.81e-14
FABP3	22.7224	1.39192	0.486522	2.86095	0.00422372	0.0164904
LOC730102	128.531	1.39343	0.375654	3.70934	0.000207802	0.001302
TMTC4	218.099	1.39433	0.266279	5.23634	1.64e-07	2.41e-06
GCLM	1099.47	1.39578	0.144427	9.66422	4.28e-22	7.16e-20
LOC100506142	14.5183	1.39709	0.560496	2.4926	0.012681	0.0408509
MLYCD	31.232	1.39779	0.470367	2.9717	0.00296156	0.0122948
KRCC1	417.617	1.39934	0.213583	6.55173	5.69e-11	1.77e-09
WDR52	72.7871	1.40017	0.379373	3.69075	0.000223592	0.00138454
FGF14	14.9944	1.40147	0.575395	2.43567	0.0148643	0.04654
APBA2	38.3354	1.40167	0.504171	2.78015	0.00543346	0.0203565
SCARF1	32.7955	1.404	0.47096	2.98114	0.00287173	0.0119776
RPS6KA2	44.0474	1.40434	0.52761	2.6617	0.00777469	0.027307
ADA	56.6419	1.40511	0.379828	3.69934	0.000216162	0.00134677
IL1R1	36.1868	1.40726	0.49972	2.8161	0.00486111	0.0185285
ZNF204P	35.0029	1.40826	0.480047	2.93358	0.00335076	0.0135635
ULBP2	444.224	1.41015	0.204406	6.89875	5.25e-12	1.93e-10
ZNF396	17.8815	1.41156	0.559983	2.52073	0.0117112	0.0382716
LINC00852	17.2469	1.41421	0.575612	2.45689	0.0140146	0.0442766
FKBP10	28.6906	1.41561	0.479912	2.94974	0.00318044	0.0129952
TNRC6C	191.085	1.41624	0.253769	5.58081	2.39e-08	4.23e-07
PCOLCE2	31.2982	1.41625	0.467509	3.02935	0.00245077	0.010476
NPY1R	11.7278	1.41716	0.578009	2.4518	0.0142143	0.0448018
ANGPTL1	19.6855	1.41788	0.54244	2.61389	0.00895169	0.0305854
RNF130	525.473	1.42111	0.234711	6.05474	1.41e-09	3.27e-08
SH2D3A	21.8072	1.42221	0.479405	2.96661	0.00301105	0.0124456
TNFRSF21	1595.41	1.42445	0.150917	9.43866	3.78e-21	5.01e-19
ZNF200	103.757	1.42587	0.304447	4.68346	2.82e-06	3.05e-05
GLI3	538.444	1.42681	0.223106	6.39521	1.6e-10	4.57e-09
PMEPA1	7651.88	1.42832	0.126199	11.318	1.07e-29	5.37e-27
FAM227A	53.0237	1.42935	0.415837	3.43729	0.000587569	0.00310854
SKAP2	822.421	1.43143	0.167772	8.53202	1.44e-17	1.26e-15
RECK	145.289	1.43206	0.34767	4.11903	3.8e-05	0.00030134
RIMS1	41.8785	1.43516	0.43405	3.30643	0.000944924	0.00465136
LEPREL1	185.762	1.4374	0.236224	6.08489	1.17e-09	2.76e-08
FMO4	50.4483	1.43837	0.532147	2.70297	0.00687237	0.0246999
HIBADH	1412.49	1.4399	0.159086	9.0511	1.42e-19	1.59e-17
LIFR-AS1	10.3196	1.44166	0.579292	2.48866	0.0128226	0.0412409
ITGB2	13.8032	1.44434	0.545689	2.64681	0.00812543	0.0283103
ACTB	100455	1.44455	0.182957	7.89557	2.89e-15	1.84e-13
SLC30A9	449.579	1.44633	0.255291	5.66543	1.47e-08	2.74e-07
SLC1A3	102.403	1.4474	0.319886	4.52472	6.05e-06	6.03e-05
LY75	14.3158	1.45296	0.587643	2.47253	0.0134162	0.0427392
ANKRD22	87.2995	1.45387	0.352454	4.12498	3.71e-05	0.000294529
LRRC2	251.792	1.45427	0.241167	6.03012	1.64e-09	3.73e-08
ACADSB	88.4683	1.45492	0.303195	4.79863	1.6e-06	1.84e-05
TSPAN13	251.899	1.45506	0.251655	5.78197	7.38e-09	1.47e-07
FADS1	1736.34	1.45921	0.142577	10.2346	1.39e-24	3.35e-22
TGM2	3301.76	1.46098	0.161234	9.06124	1.29e-19	1.46e-17
FLJ42393	65.2469	1.46264	0.378489	3.86442	0.000111355	0.000761099
B3GALT2	14.9539	1.46689	0.587099	2.49855	0.0124704	0.0403099
BRWD3	297.028	1.46694	0.277414	5.2879	1.24e-07	1.86e-06
MX2	27.7963	1.47182	0.522407	2.81739	0.00484161	0.0184761
FOXN3	883.028	1.47318	0.176914	8.32709	8.29e-17	6.62e-15
SPANXB1	16.1488	1.47426	0.575238	2.56287	0.0103812	0.0346156
LOC100506730	20.0299	1.4764	0.562875	2.62297	0.00871671	0.0299226
C14orf169	156.123	1.47815	0.280619	5.26747	1.38e-07	2.06e-06
SCN2A	21.3903	1.47836	0.538046	2.74764	0.00600261	0.0220779
CCDC122	53.6507	1.47885	0.407964	3.62495	0.000289013	0.00171486
TMEM19	668.81	1.48003	0.252049	5.87199	4.31e-09	9.09e-08
IFT27	67.6815	1.48021	0.334566	4.42426	9.68e-06	9.09e-05
DHTKD1	209.323	1.48461	0.26992	5.50017	3.79e-08	6.37e-07
HS3ST5	41.3287	1.48585	0.436275	3.40577	0.000659787	0.00341745
TSPYL2	44.8753	1.48773	0.375287	3.96424	7.36e-05	0.00052966
CPVL	251.885	1.49038	0.231458	6.43908	1.2e-10	3.55e-09
LOC101927190	37.4128	1.49112	0.485954	3.06844	0.00215182	0.00940476
LINC00632	30.4223	1.49281	0.557788	2.67631	0.00744378	0.0263527
SLC4A4	10.921	1.493	0.619167	2.41131	0.0158953	0.0493829
TCN1	15.4833	1.49825	0.590705	2.53637	0.0112007	0.0368886
LAP3	206.712	1.49849	0.24129	6.2103	5.29e-10	1.35e-08
FAM83D	1745.37	1.4986	0.149302	10.0374	1.04e-23	2.24e-21
COL4A1	873.418	1.50226	0.171087	8.78068	1.62e-18	1.69e-16
CADM2	24.8817	1.50403	0.519735	2.89384	0.00380565	0.0151228
PARD6G	46.6054	1.50736	0.491994	3.06378	0.00218562	0.00951623
COL4A5	50.1052	1.50989	0.482065	3.13213	0.00173542	0.00782327
CLTCL1	31.4004	1.512	0.509509	2.96757	0.00300165	0.0124259
C10orf67	14.4847	1.51209	0.54087	2.79566	0.00517933	0.0195742
DICER1-AS1	18.7745	1.51238	0.515339	2.93472	0.00333844	0.0135272
FAT3	220.666	1.51319	0.308814	4.90002	9.58e-07	1.17e-05
FAM49A	19.3905	1.51847	0.553008	2.74583	0.00603583	0.0221747
TTYH3	196.171	1.51883	0.228245	6.65439	2.84e-11	9.34e-10
MORC2-AS1	58.7325	1.5189	0.343457	4.42239	9.76e-06	9.15e-05
IRAK3	145.638	1.51944	0.231735	6.55679	5.5e-11	1.72e-09
PLEKHH2	71.9975	1.52116	0.316537	4.80562	1.54e-06	1.78e-05
SNCAIP	20.4827	1.52344	0.554329	2.74826	0.00599132	0.0220464
ANKRD30B	18.7226	1.52442	0.570023	2.67432	0.00748816	0.0264748
MKRN2OS	23.2016	1.52694	0.540913	2.82289	0.00475923	0.0182397
PLLP	81.3527	1.52749	0.389821	3.91845	8.91e-05	0.000626732
TMCO2	43.7946	1.52811	0.47671	3.20554	0.00134812	0.00632402
IQCH	28.3833	1.52883	0.477684	3.2005	0.00137189	0.00641869
ZNF543	56.7164	1.53435	0.375985	4.08088	4.49e-05	0.000346789
CSGALNACT1	90.3317	1.53505	0.351447	4.36779	1.26e-05	0.000114589
HLA-F-AS1	11.887	1.53559	0.579256	2.65097	0.00802604	0.0280309
NME5	14.5537	1.54016	0.582893	2.64228	0.00823512	0.0286242
ST6GALNAC5	17.8789	1.5427	0.563037	2.73996	0.00614468	0.0224973
LRRC1	109.701	1.54378	0.300514	5.13712	2.79e-07	3.9e-06
TMEM220	21.2141	1.54423	0.535881	2.88166	0.00395581	0.0156383
LYRM1	379.012	1.54683	0.263843	5.86269	4.55e-09	9.59e-08
SLITRK6	13.436	1.54886	0.604601	2.5618	0.0104133	0.0347079
CLCN5	25.415	1.54974	0.545053	2.84329	0.00446507	0.0172777
RIMS2	149.611	1.54998	0.594793	2.60592	0.00916274	0.0312332
ACSM4	17.6427	1.55001	0.538781	2.87688	0.0040163	0.0158252
SPINT1	23.6274	1.55262	0.534116	2.90689	0.00365038	0.0145961
XAF1	299.048	1.55526	0.222756	6.9819	2.91e-12	1.13e-10
SLC22A23	29.3191	1.556	0.455303	3.41751	0.000631979	0.00330431
ESM1	182.974	1.55715	0.50022	3.11293	0.00185242	0.00829909
HSD3BP4	17.7293	1.55769	0.531116	2.93286	0.00335855	0.0135847
NEURL1B	203.895	1.56135	0.244833	6.37721	1.8e-10	5.07e-09
PPP1R14C	18.9088	1.56192	0.583923	2.67488	0.00747563	0.0264479
TRNP1	45.741	1.56219	0.490309	3.18614	0.00144185	0.00668562
LAPTM4A	9905.59	1.56288	0.22211	7.03648	1.97e-12	7.86e-11
ISPD	64.1032	1.56509	0.405323	3.86133	0.000112771	0.000768816
TPTE	70.685	1.56528	0.409122	3.82594	0.000130273	0.000868956
SEMA6B	106.848	1.569	0.299146	5.24494	1.56e-07	2.31e-06
DDX43	13.3453	1.57647	0.591392	2.66569	0.00768304	0.0270506
HYDIN	13.2446	1.57717	0.572189	2.75637	0.0058447	0.0216062
ABCB10	400.995	1.57882	0.217292	7.26589	3.71e-13	1.65e-11
ABCC6	17.4135	1.58337	0.538416	2.94079	0.00327376	0.0133189
SH3BGRL2	106.914	1.58697	0.286422	5.54067	3.01e-08	5.2e-07
LOC101927701	144.549	1.58759	0.272525	5.82548	5.69e-09	1.16e-07
CMTM8	451.33	1.59205	0.212202	7.50253	6.26e-14	3.26e-12
ST3GAL5	65.5829	1.59271	0.334336	4.76379	1.9e-06	2.15e-05
COL1A1	64.7489	1.59299	0.336121	4.73933	2.14e-06	2.39e-05
FAHD2B	24.4375	1.59763	0.498501	3.20487	0.00135124	0.00633314
GAS6-AS2	109.513	1.59817	0.317677	5.0308	4.88e-07	6.42e-06
STRBP	167.014	1.59899	0.281473	5.68081	1.34e-08	2.53e-07
LIPG	140.738	1.59902	0.381859	4.18745	2.82e-05	0.000231185
OASL	499.524	1.60053	0.241184	6.63613	3.22e-11	1.04e-09
TDRKH	37.3924	1.60088	0.504512	3.17314	0.00150801	0.00695226
ZNF275	103.895	1.60107	0.340367	4.70396	2.55e-06	2.8e-05
ZNF516	81.5944	1.60841	0.332307	4.84013	1.3e-06	1.52e-05
TMPRSS15	27.8035	1.6107	0.580634	2.77404	0.00553653	0.0206809
GPR126	386.641	1.61085	0.256648	6.2765	3.46e-10	9.12e-09
ZNF169	66.4411	1.61424	0.373156	4.32593	1.52e-05	0.000134123
PALM2	123.255	1.61664	0.304073	5.31663	1.06e-07	1.61e-06
P4HA2-AS1	20.121	1.61821	0.547501	2.95563	0.00312028	0.0128048
PSAT1	1851.09	1.61987	0.188333	8.6011	7.9e-18	7.16e-16
DNM3	45.896	1.62388	0.473568	3.42903	0.000605751	0.00319003
TATDN3	102.324	1.62446	0.385828	4.21033	2.55e-05	0.000211186
MIR4263	13.1205	1.62504	0.564295	2.87978	0.00397957	0.015709
TNFSF15	943.098	1.62641	0.210855	7.7134	1.23e-14	7.23e-13
PCDHB6	28.3133	1.62884	0.506218	3.21767	0.00129236	0.00609438
AXIN2	129.631	1.62898	0.279987	5.81806	5.95e-09	1.21e-07
NKX3-2	20.5673	1.62947	0.513941	3.17054	0.00152155	0.00700864
IDH2	46.437	1.63176	0.414114	3.94037	8.14e-05	0.000578479
CCDC163P	34.1972	1.63275	0.483195	3.37908	0.000727289	0.00370378
PINK1-AS	12.7462	1.63368	0.581054	2.81159	0.00492979	0.0187458
ZNF704	69.4828	1.63432	0.458041	3.56807	0.000359617	0.00205924
LINC01207	10.0933	1.63556	0.5953	2.74745	0.00600607	0.0220855
PTGFRN	179.817	1.63709	0.258522	6.33249	2.41e-10	6.61e-09
FAXC	47.5385	1.64084	0.617553	2.657	0.00788383	0.0276123
TNS1	78.1229	1.64135	0.343549	4.77763	1.77e-06	2.02e-05
NGFR	55.1493	1.64278	0.39567	4.15188	3.3e-05	0.000265225
FBXO4	230.388	1.64325	0.246973	6.65356	2.86e-11	9.38e-10
LYPD6	75.8833	1.6465	0.38449	4.28229	1.85e-05	0.000159228
NIPSNAP3B	25.4207	1.64755	0.45869	3.59186	0.000328322	0.00190655
LOC202181	20.6944	1.65123	0.523796	3.15242	0.00161922	0.00737812
MCMDC2	11.8083	1.65466	0.603102	2.74358	0.00607731	0.0223103
GJA3	68.8403	1.65551	0.330688	5.00625	5.55e-07	7.19e-06
MSR1	15.914	1.66177	0.585591	2.83776	0.00454316	0.0175204
BCO2	18.5765	1.66327	0.518779	3.20613	0.00134531	0.00631271
LINC01003	21.597	1.66382	0.538918	3.08733	0.00201966	0.00892183
APOBEC3G	190.973	1.66542	0.349444	4.76591	1.88e-06	2.13e-05
LOC101928100	98.2846	1.66577	0.273566	6.08909	1.14e-09	2.7e-08
LOC101928036	10.0543	1.66752	0.591831	2.81757	0.00483892	0.0184702
MDH1B	18.9784	1.66853	0.572151	2.91625	0.00354269	0.0142195
LINC01122	11.3087	1.66867	0.618335	2.69865	0.0069622	0.0249669
IGDCC4	177.716	1.66978	0.331284	5.04032	4.65e-07	6.15e-06
BCL11A	40.3974	1.6726	0.464949	3.59738	0.00032144	0.001872
TIMP4	31.1348	1.67634	0.567373	2.95457	0.00313108	0.0128425
TSPYL5	232.811	1.67768	0.257023	6.52735	6.69e-11	2.07e-09
AR	121.773	1.68664	0.335114	5.03302	4.83e-07	6.36e-06
RGL1	117.81	1.6895	0.281585	5.99997	1.97e-09	4.43e-08
PRSS22	34.0147	1.69443	0.470696	3.59985	0.0003184	0.00185564
TCF4	396.269	1.69545	0.292641	5.7936	6.89e-09	1.38e-07
WHAMMP3	22.7952	1.6966	0.55923	3.03381	0.00241484	0.0103488
MATN3	41.0801	1.69868	0.438462	3.87417	0.000106987	0.000734999
LOC100505912	41.0018	1.69904	0.416411	4.0802	4.5e-05	0.000347471
REEP6	11.6501	1.70053	0.610631	2.78488	0.00535475	0.020133
FREM2	40.1206	1.70182	0.423323	4.02015	5.82e-05	0.000433497
TP63	18.422	1.70243	0.547971	3.10678	0.00189136	0.008448
MAP3K1	1605.68	1.70484	0.204812	8.32394	8.51e-17	6.77e-15
PROX2	11.9696	1.70602	0.599926	2.84372	0.00445898	0.017262
ST3GAL4-AS1	16.2585	1.71207	0.567563	3.01654	0.00255681	0.0108587
TOX	60.6293	1.71383	0.380908	4.49932	6.82e-06	6.69e-05
KAZN	155.247	1.71647	0.289538	5.92832	3.06e-09	6.67e-08
QRICH2	20.2729	1.71677	0.492748	3.48408	0.000493832	0.00268243
PITX2	13.9761	1.71814	0.604455	2.84247	0.00447657	0.0173129
ONECUT2	100.14	1.71828	0.302446	5.6813	1.34e-08	2.53e-07
ZSWIM4	63.3608	1.72495	0.397564	4.3388	1.43e-05	0.000128195
LAIR2	19.1335	1.72774	0.56788	3.04244	0.00234671	0.010127
RIMKLA	15.2334	1.73083	0.600864	2.88057	0.00396962	0.0156736
PIGA	183.967	1.7312	0.295959	5.84946	4.93e-09	1.03e-07
HAS2	460.193	1.73137	0.180209	9.60755	7.43e-22	1.19e-19
EBF4	18.2026	1.73408	0.520099	3.33413	0.000855654	0.00426023
NR2F1	501.11	1.73576	0.229796	7.5535	4.24e-14	2.28e-12
HSF2BP	98.4477	1.73609	0.422882	4.10538	4.04e-05	0.000317192
NPR3	12.4194	1.73735	0.588216	2.9536	0.00314095	0.0128707
LHX9	11.4858	1.73741	0.608358	2.8559	0.0042915	0.0167144
SLC8A1-AS1	46.2686	1.73805	0.415797	4.18005	2.91e-05	0.000237865
TTC13	143.108	1.74282	0.397974	4.37923	1.19e-05	0.000109436
GPR65	12.1398	1.74412	0.616007	2.83133	0.00463544	0.0178206
PCSK5	132.204	1.74593	0.282694	6.17603	6.57e-10	1.64e-08
VDR	67.8435	1.74629	0.388738	4.4922	7.05e-06	6.89e-05
SPATA17	25.9824	1.74681	0.521936	3.34678	0.000817554	0.00409593
LAMA2	47.7597	1.74906	0.372758	4.69221	2.7e-06	2.95e-05
RBM24	257.629	1.74928	0.238945	7.32083	2.46e-13	1.15e-11
WNT5A	76.4222	1.74941	0.622425	2.81064	0.0049443	0.0187878
LOC100507642	20.7698	1.75079	0.585259	2.99148	0.00277624	0.0116337
LOC101929162	29.7824	1.75199	0.496022	3.53209	0.000412296	0.00230489
ARSE	50.5444	1.75342	0.391122	4.48304	7.36e-06	7.13e-05
ZNF708	221.794	1.7545	0.218318	8.03645	9.25e-16	6.37e-14
THBS1	1434.79	1.7594	0.183293	9.59884	8.08e-22	1.26e-19
CNN3	5561.03	1.76151	0.143946	12.2373	1.96e-34	1.75e-31
LDOC1	279.04	1.7617	0.209711	8.40064	4.44e-17	3.7e-15
RHOBTB3	3775.33	1.76606	0.157625	11.2042	3.89e-29	1.78e-26
LOC101927811	15.1328	1.76633	0.532824	3.31503	0.000916318	0.00452998
LINC00397	24.4855	1.76765	0.491982	3.59291	0.000327002	0.00189957
MCF2L2	11.9423	1.76801	0.600978	2.9419	0.00326208	0.0132841
S1PR3	122.799	1.76858	0.327419	5.40159	6.61e-08	1.05e-06
HSPA12A	70.6708	1.76858	0.406484	4.35093	1.36e-05	0.00012266
CLEC2D	111.445	1.76992	0.291746	6.06664	1.31e-09	3.05e-08
THSD4	135.556	1.77534	0.334101	5.31379	1.07e-07	1.64e-06
CCR1	24.9204	1.77898	0.495665	3.58909	0.00033184	0.0019235
FKBP14	350.974	1.78068	0.249845	7.12714	1.02e-12	4.3e-11
GBAS	1028.47	1.78121	0.183773	9.69242	3.25e-22	5.55e-20
ATP6V0A2	464.993	1.78132	0.205462	8.66985	4.33e-18	4.11e-16
GLIS3	151.361	1.78368	0.287465	6.20485	5.48e-10	1.39e-08
AK5	21.8594	1.78446	0.536428	3.32655	0.000879276	0.00436837
IPMK	305.61	1.78683	0.239389	7.4641	8.39e-14	4.24e-12
SNX10	33.5521	1.78869	0.42484	4.21026	2.55e-05	0.000211186
LINC01021	120.476	1.78986	0.565047	3.16763	0.00153687	0.00707109
TRIL	176.204	1.79066	0.28832	6.21066	5.28e-10	1.35e-08
ZNF461	72.6377	1.79446	0.336451	5.33348	9.63e-08	1.49e-06
GOLGA8A	21.6502	1.79596	0.546983	3.28339	0.00102567	0.00500377
MGAT4A	32.4245	1.79722	0.466766	3.85037	0.000117942	0.000799317
ARL15	144.68	1.8004	0.313582	5.7414	9.39e-09	1.83e-07
LRRC39	13.945	1.80566	0.595363	3.03287	0.0024224	0.0103701
LOC729970	49.7136	1.81491	0.464778	3.9049	9.43e-05	0.000656859
MIR4755	13.2427	1.81754	0.589337	3.08404	0.00204212	0.00901115
RARB	48.746	1.81794	0.440324	4.12864	3.65e-05	0.0002903
HHIP-AS1	378.095	1.81868	0.296904	6.12549	9.04e-10	2.18e-08
GALNT14	13.1321	1.82509	0.598502	3.04943	0.00229272	0.00992608
LOC100128288	10.4946	1.82761	0.612415	2.98426	0.00284264	0.0118747
VSTM1	11.1459	1.82941	0.601614	3.04083	0.00235929	0.0101731
PIGM	737.71	1.8302	0.171717	10.6582	1.6e-26	4.42e-24
RALGAPA2	49.241	1.83108	0.407123	4.4976	6.87e-06	6.74e-05
NUTF2	480.39	1.83171	0.215711	8.49152	2.04e-17	1.76e-15
RBM44	10.1505	1.83254	0.59673	3.07097	0.00213368	0.00933817
ECM2	69.2098	1.83324	0.401887	4.56158	5.08e-06	5.19e-05
LOC100506985	29.0445	1.83412	0.515585	3.55736	0.000374594	0.00213132
WIPF3	12.209	1.83432	0.599141	3.06159	0.00220167	0.00957833
LOC100507557	42.6916	1.84051	0.438349	4.19873	2.68e-05	0.000220937
MEX3B	14.8913	1.8407	0.565194	3.25676	0.00112693	0.00540158
CTSO	123.617	1.84366	0.332266	5.54874	2.88e-08	4.97e-07
GNRHR	45.012	1.84677	0.470615	3.92416	8.7e-05	0.000613386
DNAJC6	60.8567	1.84864	0.354476	5.21514	1.84e-07	2.68e-06
SERPINB9	591.129	1.84923	0.199922	9.24978	2.25e-20	2.74e-18
MPP2	19.3061	1.85288	0.54704	3.38709	0.000706379	0.0036214
TGFB2	503.273	1.85407	0.188633	9.829	8.45e-23	1.6e-20
SLC22A5	77.6328	1.8554	0.306496	6.05359	1.42e-09	3.29e-08
LINC00339	60.4009	1.85542	0.430892	4.30599	1.66e-05	0.000144648
SH3PXD2B	80.3129	1.85809	0.361892	5.13436	2.83e-07	3.94e-06
EPHA7	41.5155	1.86576	0.440103	4.23938	2.24e-05	0.000188489
NNMT	446.039	1.86852	0.208368	8.96742	3.04e-19	3.32e-17
C3orf65	18.0928	1.87501	0.556688	3.36815	0.000756742	0.00383069
2019-03-04	65.6379	1.87791	0.367024	5.11659	3.11e-07	4.31e-06
SYT11	29.2523	1.87895	0.484761	3.87603	0.000106176	0.000730993
IL1RAPL1	178.095	1.88305	0.309776	6.07874	1.21e-09	2.84e-08
FAM89A	221.493	1.88423	0.262044	7.1905	6.46e-13	2.81e-11
PRKG1-AS1	12.5321	1.88466	0.572571	3.29157	0.000996301	0.00487438
CTH	125.456	1.88785	0.324529	5.81719	5.98e-09	1.21e-07
HOXB3	62.9246	1.88871	0.358391	5.26998	1.36e-07	2.03e-06
MMP13	11.5267	1.89416	0.610414	3.10308	0.00191517	0.00853301
HRNR	10.5288	1.89456	0.591131	3.20498	0.00135072	0.00633252
GRAMD1B	27.3912	1.89534	0.51097	3.70929	0.000207839	0.001302
HLA-DRB1	24.471	1.89611	0.491642	3.8567	0.00011493	0.000781193
NPC2	1851.95	1.90281	0.167464	11.3625	6.42e-30	3.56e-27
IFIT1	565.375	1.91236	0.252764	7.56579	3.86e-14	2.09e-12
SCN5A	424.525	1.92106	0.175392	10.9529	6.43e-28	2.15e-25
TMEM106B	1303.27	1.92135	0.156934	12.243	1.83e-34	1.73e-31
GPR85	13.4111	1.92271	0.578154	3.32561	0.000882255	0.0043764
ABCA13	23.0937	1.92331	0.546473	3.51949	0.00043238	0.00239542
BORA	185.666	1.92907	0.257152	7.50167	6.3e-14	3.28e-12
PBX1	145.895	1.92951	0.280125	6.88802	5.66e-12	2.07e-10
ITGA1	203.065	1.92969	0.240257	8.03177	9.61e-16	6.59e-14
FAM198B	21.3532	1.93179	0.559364	3.45354	0.000553274	0.00295239
NBPF12	11.5097	1.93345	0.575762	3.35808	0.000784858	0.00395432
GBP4	184.155	1.93395	0.293508	6.58909	4.43e-11	1.4e-09
UNC5C	26.1121	1.95381	0.535428	3.64906	0.000263201	0.00158512
C1orf106	14.6319	1.95477	0.566996	3.44758	0.000565625	0.00300631
MYB	23.2757	1.95573	0.51078	3.82892	0.000128708	0.000860303
GPNMB	20.468	1.95745	0.56801	3.44615	0.00056863	0.00301829
SH3YL1	110.766	1.95899	0.342114	5.72614	1.03e-08	1.99e-07
ZNF354C	17.1946	1.96541	0.575942	3.41251	0.000643668	0.00335125
SPEF2	41.1564	1.96768	0.49425	3.98114	6.86e-05	0.000498876
CXCR4	960.979	1.96873	0.262627	7.49628	6.57e-14	3.4e-12
GPLD1	15.634	1.96977	0.548191	3.59322	0.000326615	0.00189801
SOX5	25.3829	1.97042	0.516586	3.81432	0.000136561	0.000904137
MPP4	47.9792	1.9707	0.476896	4.13234	3.59e-05	0.000286379
HCG23	14.0478	1.97097	0.586539	3.36034	0.000778459	0.00392455
C1orf226	35.0181	1.99995	0.433849	4.60978	4.03e-06	4.2e-05
ZNF702P	37.8875	2.00583	0.495898	4.04484	5.24e-05	0.00039651
PCDHB11	82.78	2.02354	0.403359	5.01671	5.26e-07	6.86e-06
SLAMF7	17.3396	2.02467	0.543434	3.72569	0.000194778	0.00123268
NUP62CL	24.0383	2.02701	0.534153	3.7948	0.00014776	0.000969493
HLA-DRA	276.627	2.02909	0.309065	6.56525	5.19e-11	1.63e-09
TNFRSF9	24.8349	2.03914	0.572264	3.56329	0.000366235	0.00209014
PARP15	29.8876	2.04257	0.540737	3.77739	0.00015848	0.00103057
EML1	10.2043	2.04358	0.603384	3.38686	0.000706966	0.00362326
MGAT4C	27.6968	2.04799	0.568314	3.60362	0.000313816	0.00183092
COL5A1	479.264	2.04823	0.172443	11.8778	1.54e-32	1.13e-29
PIK3R3	166.716	2.04974	0.295732	6.93105	4.18e-12	1.56e-10
POU3F2	104.279	2.066	0.380107	5.43532	5.47e-08	8.84e-07
VASH2	38.1842	2.06704	0.479423	4.31153	1.62e-05	0.000141529
NIPAL1	20.5747	2.08036	0.523883	3.97105	7.16e-05	0.000517183
NDST3	52.2732	2.08187	0.371129	5.60956	2.03e-08	3.66e-07
PSTPIP2	91.917	2.10189	0.338826	6.20344	5.52e-10	1.4e-08
FYB	25.154	2.10863	0.545564	3.86505	0.000111068	0.000759464
MYH10	100.672	2.10916	0.306283	6.88633	5.73e-12	2.09e-10
GNG7	10.5347	2.11286	0.609964	3.46391	0.000532381	0.00285799
DDI2	13.3127	2.12145	0.58215	3.64416	0.000268263	0.00161078
PCDHGB5	11.7076	2.12757	0.602369	3.53201	0.000412418	0.00230489
MICALCL	13.9473	2.12841	0.588381	3.6174	0.000297579	0.00175531
PNPLA3	81.1862	2.13704	0.353602	6.04362	1.51e-09	3.48e-08
SPRR2E	29.0165	2.14542	0.561185	3.82303	0.000131824	0.000877648
WDR5B	105.555	2.14853	0.34772	6.1789	6.45e-10	1.61e-08
B4GALNT1	14.5124	2.14884	0.586008	3.66691	0.0002455	0.00149421
RPS6KA6	17.5877	2.15318	0.555679	3.87487	0.000106683	0.000733539
GPR19	11.5604	2.16232	0.590567	3.66143	0.000250812	0.00152193
CTHRC1	499.157	2.16803	0.221057	9.80753	1.04e-22	1.89e-20
SERPINA5	26.7859	2.17357	0.592023	3.67143	0.000241197	0.00147248
CASC15	49.3923	2.18382	0.445941	4.89711	9.73e-07	1.19e-05
SLC4A8	54.4618	2.18871	0.423921	5.16301	2.43e-07	3.45e-06
ZNF713	30.6389	2.18945	0.474957	4.60979	4.03e-06	4.2e-05
RAB40AL	12.7129	2.18963	0.588741	3.71917	0.00019988	0.0012598
SYNGR1	14.5071	2.1937	0.581783	3.77065	0.000162824	0.00105711
FAM222A	14.7697	2.19389	0.57894	3.7895	0.000150952	0.000987209
RNASE4	81.4507	2.19549	0.414953	5.29095	1.22e-07	1.83e-06
RGS7	35.0118	2.19735	0.433722	5.06627	4.06e-07	5.44e-06
PARD6B	91.8238	2.2032	0.288929	7.62539	2.43e-14	1.4e-12
EN2	26.0456	2.22501	0.522235	4.26055	2.04e-05	0.000173213
GNGT2	14.9359	2.23252	0.580581	3.84532	0.000120395	0.000813538
IGSF3	147.483	2.23965	0.268306	8.34736	6.98e-17	5.69e-15
ACVR1C	41.6005	2.23981	0.480169	4.66463	3.09e-06	3.31e-05
CCNYL2	24.7635	2.24565	0.56723	3.95898	7.53e-05	0.000539397
NREP	245.097	2.25591	0.238575	9.45577	3.21e-21	4.36e-19
LRP4	17.5143	2.25739	0.556431	4.0569	4.97e-05	0.000379089
SEMA6D	13.1414	2.26583	0.56735	3.99371	6.5e-05	0.000476427
MAP2	91.8662	2.26654	0.300877	7.53313	4.95e-14	2.65e-12
MMP9	31.9399	2.27034	0.453545	5.00576	5.56e-07	7.21e-06
MROH8	15.1355	2.27618	0.590772	3.85288	0.000116735	0.000792138
ZFP3	10.9576	2.27787	0.596484	3.81883	0.000134086	0.000889955
SHISA2	182.303	2.29552	0.530173	4.32976	1.49e-05	0.000132316
MTUS1	116.47	2.30608	0.304	7.5858	3.3e-14	1.83e-12
MBLAC2	103.17	2.30678	0.361096	6.38828	1.68e-10	4.74e-09
LRRN1	29.3821	2.32253	0.461688	5.03052	4.89e-07	6.42e-06
KLHL7-AS1	21.4044	2.3247	0.508984	4.56733	4.94e-06	5.06e-05
SMIM18	13.2893	2.32796	0.588976	3.95255	7.73e-05	0.000552717
FLG	10.8729	2.33635	0.604009	3.86807	0.000109702	0.000751399
RAB41	13.5252	2.34207	0.59489	3.93698	8.25e-05	0.000585389
DZIP1	25.7921	2.34443	0.500671	4.68257	2.83e-06	3.06e-05
GPR116	294.598	2.35313	0.261797	8.98839	2.51e-19	2.8e-17
HOXB5	13.5387	2.36161	0.568803	4.1519	3.3e-05	0.000265225
LPHN3	96.1256	2.36247	0.373583	6.32382	2.55e-10	6.92e-09
SIRT4	21.4154	2.36384	0.526839	4.48683	7.23e-06	7.03e-05
ILDR2	20.164	2.36913	0.54835	4.32046	1.56e-05	0.00013696
LINC01094	28.8561	2.37169	0.498062	4.76183	1.92e-06	2.16e-05
HHAT	57.9777	2.37379	0.369802	6.4191	1.37e-10	3.97e-09
ULK2	16.0232	2.37456	0.554283	4.28401	1.84e-05	0.000158082
IL1B	29.0828	2.37767	0.470057	5.05826	4.23e-07	5.67e-06
ADAM12	22.5243	2.37861	0.546107	4.35557	1.33e-05	0.000120302
TFAP2C	45.9335	2.38611	0.40307	5.91985	3.22e-09	6.98e-08
PFN2	1183.6	2.40644	0.222022	10.8387	2.26e-27	6.97e-25
HLA-DPA1	44.7581	2.42299	0.485756	4.9881	6.1e-07	7.82e-06
SUGCT	25.9599	2.42555	0.51586	4.70195	2.58e-06	2.82e-05
ANKRD61	17.8701	2.428	0.554604	4.3779	1.2e-05	0.000109855
SNAI2	378.813	2.44171	0.256363	9.52442	1.66e-21	2.42e-19
LOC101927921	20.6794	2.44975	0.56528	4.33369	1.47e-05	0.000130624
DCLK1	300.452	2.4566	0.240343	10.2212	1.59e-24	3.71e-22
PKIB	255.349	2.45812	0.331617	7.41254	1.24e-13	6.09e-12
INHBA	57.8182	2.4585	0.370161	6.64169	3.1e-11	1.01e-09
CDK20	19.4809	2.46999	0.578942	4.26639	1.99e-05	0.000169731
EFNA1	58.803	2.48193	0.413463	6.00279	1.94e-09	4.37e-08
LOC100506124	15.9207	2.4981	0.567906	4.39879	1.09e-05	0.000100873
EPM2A	30.7385	2.52404	0.516139	4.89023	1.01e-06	1.22e-05
SLCO3A1	53.9571	2.547	0.619326	4.11254	3.91e-05	0.000308877
LOC101927948	42.9562	2.54869	0.530071	4.8082	1.52e-06	1.76e-05
ZMAT1	50.84	2.57962	0.460655	5.59989	2.14e-08	3.82e-07
KMO	11.0299	2.58185	0.583908	4.42167	9.79e-06	9.18e-05
TLR8-AS1	15.5646	2.59727	0.553408	4.69323	2.69e-06	2.93e-05
CD24	352.514	2.60207	0.195057	13.34	1.35e-40	2.72e-37
SUSD4	12.1181	2.60222	0.589768	4.41228	1.02e-05	9.55e-05
PAPPA	207.414	2.60264	0.25461	10.2221	1.58e-24	3.71e-22
LOC283299	24.6693	2.60413	0.530395	4.90979	9.12e-07	1.12e-05
CLDN1	129.467	2.61359	0.573995	4.55334	5.28e-06	5.36e-05
TMEM108	11.6941	2.62197	0.605995	4.32672	1.51e-05	0.000133789
CSMD3	10.3194	2.65122	0.611004	4.33911	1.43e-05	0.000128155
FXYD6	10.6106	2.65137	0.59175	4.48056	7.44e-06	7.2e-05
TMEM17	135.663	2.65959	0.307878	8.63846	5.7e-18	5.29e-16
SPARC	307.914	2.67658	0.238654	11.2153	3.43e-29	1.62e-26
C10orf85	47.1533	2.685	0.406572	6.60399	4e-11	1.28e-09
ASTN1	11.0877	2.68885	0.60659	4.43273	9.3e-06	8.8e-05
HSPB8	10.2705	2.69486	0.605413	4.45128	8.54e-06	8.13e-05
ST6GAL1	70.5249	2.69509	0.385906	6.9838	2.87e-12	1.12e-10
SPOCK1	106.08	2.70636	0.519019	5.21437	1.84e-07	2.69e-06
ZMIZ1-AS1	13.0078	2.71117	0.581212	4.66469	3.09e-06	3.31e-05
SLC46A3	78.3528	2.73401	0.396775	6.89058	5.56e-12	2.04e-10
LOC100506474	13.9975	2.73593	0.603791	4.53125	5.86e-06	5.88e-05
MAGEA11	34.5596	2.74076	0.463324	5.91543	3.31e-09	7.13e-08
F11R	390.745	2.7495	0.222872	12.3367	5.75e-35	5.77e-32
SERPINA3	12.9265	2.76751	0.607943	4.55226	5.31e-06	5.39e-05
ZNF98	29.0444	2.77587	0.498216	5.57161	2.52e-08	4.44e-07
KCTD15	12.0783	2.80033	0.615057	4.55295	5.29e-06	5.37e-05
NTN4	178.16	2.80543	0.252034	11.1312	8.85e-29	3.64e-26
RAB9B	33.3616	2.81081	0.499759	5.62434	1.86e-08	3.39e-07
MMP7	15.2015	2.81524	0.589332	4.777	1.78e-06	2.03e-05
IQGAP2	12.0353	2.8154	0.610227	4.61369	3.96e-06	4.13e-05
THBS2	117.361	2.81795	0.338659	8.32092	8.73e-17	6.91e-15
LINC01012	23.8821	2.81922	0.496646	5.67652	1.37e-08	2.59e-07
SYTL5	119.93	2.84051	0.613327	4.63131	3.63e-06	3.83e-05
PKHD1	21.7846	2.84206	0.551007	5.15793	2.5e-07	3.51e-06
TSPAN2	14.6253	2.84471	0.595451	4.7774	1.78e-06	2.03e-05
NOTCH3	21.7116	2.85022	0.53035	5.37422	7.69e-08	1.21e-06
SLITRK1	31.9009	2.8514	0.552936	5.15683	2.51e-07	3.53e-06
ELMO1	10.2411	2.86192	0.603785	4.73997	2.14e-06	2.38e-05
MSX2	18.3447	2.86641	0.564947	5.07376	3.9e-07	5.27e-06
FZD3	47.1504	2.86872	0.469273	6.11312	9.77e-10	2.35e-08
PDE1C	227.908	2.88632	0.267946	10.772	4.67e-27	1.36e-24
SEL1L3	18.7696	2.88764	0.559769	5.15862	2.49e-07	3.51e-06
LOC643201	150.154	2.89214	0.378751	7.636	2.24e-14	1.29e-12
KLRC2	264.378	2.89448	0.318788	9.07963	1.09e-19	1.24e-17
INHBB	74.6679	2.91519	0.398472	7.31592	2.56e-13	1.19e-11
NOG	81.7958	2.92154	0.332995	8.77353	1.73e-18	1.79e-16
ARSG	24.5721	2.92343	0.515939	5.66622	1.46e-08	2.73e-07
TENM1	78.5904	2.92624	0.391575	7.47302	7.84e-14	4.01e-12
FBP1	38.1379	2.93898	0.474165	6.19823	5.71e-10	1.44e-08
LINC00622	127.051	2.99726	0.381592	7.85461	4.01e-15	2.55e-13
ATP9A	47.8837	2.99965	0.39612	7.57257	3.66e-14	2e-12
HOXB-AS3	20.0719	3.00997	0.548242	5.49022	4.01e-08	6.7e-07
ETV7	11.721	3.02342	0.595405	5.07793	3.82e-07	5.16e-06
EPHA5	22.1755	3.02943	0.566563	5.34703	8.94e-08	1.39e-06
KAL1	50.7556	3.05114	0.45916	6.64504	3.03e-11	9.92e-10
UBD	86.8442	3.05399	0.452717	6.74592	1.52e-11	5.21e-10
SERINC2	29.1613	3.08094	0.54364	5.66723	1.45e-08	2.71e-07
LINC00333	19.1096	3.08432	0.561052	5.49738	3.85e-08	6.47e-07
ARHGAP28	16.674	3.12394	0.574582	5.4369	5.42e-08	8.78e-07
KLRC3	34.9597	3.13172	0.47255	6.62727	3.42e-11	1.1e-09
TMLHE	35.5738	3.17236	0.485437	6.53506	6.36e-11	1.97e-09
CHRNA1	11.9843	3.17505	0.613518	5.17514	2.28e-07	3.24e-06
CD33	161.644	3.18389	0.368687	8.63574	5.83e-18	5.39e-16
TPD52L1	39.792	3.213	0.476309	6.74563	1.52e-11	5.21e-10
TCTN1	101.725	3.26345	0.349432	9.33931	9.7e-21	1.21e-18
LINC01139	147.141	3.29146	0.37352	8.81199	1.23e-18	1.3e-16
LOC101927229	13.5913	3.29313	0.616028	5.34575	9e-08	1.4e-06
PRDM1	86.6418	3.30248	0.412104	8.0137	1.11e-15	7.54e-14
NAALADL2	19.7727	3.3089	0.574351	5.76111	8.36e-09	1.64e-07
FGF13	39.9396	3.32568	0.531809	6.25354	4.01e-10	1.04e-08
C3orf55	39.4304	3.33615	0.499373	6.68067	2.38e-11	7.94e-10
SAA1	71.1045	3.36953	0.405121	8.31734	9e-17	7.08e-15
MPZL3	32.4652	3.40619	0.535552	6.36015	2.02e-10	5.61e-09
HMCN1	23.0715	3.4247	0.545029	6.28353	3.31e-10	8.77e-09
MEX3A	71.1102	3.46001	0.398978	8.67217	4.24e-18	4.05e-16
LINC01204	32.8041	3.50104	0.524929	6.66956	2.57e-11	8.53e-10
TNFSF4	222.113	3.54797	0.304911	11.6361	2.7e-31	1.81e-28
TNFRSF11B	994.851	3.54818	0.275197	12.8932	4.91e-38	7.18e-35
FIRRE	28.0352	3.57736	0.539242	6.63406	3.27e-11	1.05e-09
LGR6	12.2851	3.5879	0.605604	5.9245	3.13e-09	6.81e-08
SPP1	10.8148	3.6098	0.61403	5.87886	4.13e-09	8.78e-08
LINC00645	55.3052	3.71489	0.474018	7.83703	4.61e-15	2.92e-13
FHL1	198.695	3.72368	0.29601	12.5796	2.73e-36	3.38e-33
MUC15	12.7759	3.79606	0.605721	6.26702	3.68e-10	9.64e-09
DMD	98.3006	3.80646	0.400177	9.51194	1.87e-21	2.66e-19
TDRD1	38.3916	3.81677	0.52088	7.32753	2.34e-13	1.1e-11
LINC00601	37.686	3.8354	0.483313	7.93564	2.09e-15	1.36e-13
SHISA3	95.8691	3.86954	0.41155	9.40237	5.33e-21	6.97e-19
SORBS1	30.7817	3.88702	0.521848	7.44856	9.44e-14	4.74e-12
ZNF812	22.1182	3.92712	0.595246	6.59748	4.18e-11	1.33e-09
PLEKHG1	18.6764	4.03868	0.59261	6.81507	9.42e-12	3.36e-10
LOC400655	68.2663	4.06151	0.440667	9.21673	3.06e-20	3.7e-18
ALOX5AP	33.1782	4.12336	0.533611	7.72727	1.1e-14	6.54e-13
KRT81	247.515	4.15142	0.261149	15.8968	6.67e-57	1.07e-52
DAPK1	54.1881	4.21425	0.490578	8.59037	8.67e-18	7.78e-16
GUCY1A2	34.6898	4.3055	0.516329	8.33868	7.51e-17	6.05e-15
ADAMTS14	83.3242	4.30841	0.380321	11.3284	9.5e-30	4.92e-27
BCHE	63.1958	4.57469	0.487373	9.38642	6.21e-21	8.04e-19
BMP5	34.4175	4.57578	0.527923	8.66751	4.42e-18	4.17e-16
STRA6	29.3599	4.75452	0.568668	8.36079	6.23e-17	5.11e-15
HOXB9	95.1137	4.82637	0.416134	11.5981	4.21e-31	2.71e-28
TFCP2L1	53.3477	4.92818	0.517847	9.51667	1.79e-21	2.56e-19
COL3A1	69.7047	4.96079	0.456421	10.8689	1.62e-27	5.21e-25
COX7B2	90.7608	4.99234	0.466482	10.7021	9.95e-27	2.8e-24
VCAM1	43.5454	5.1074	0.540314	9.45266	3.3e-21	4.46e-19
LYPD6B	39.2649	5.29964	0.553182	9.58027	9.68e-22	1.48e-19
F13A1	64.08	5.33334	0.484545	11.0069	3.54e-28	1.26e-25

## Sheet: Brain_IP.v.MFP_IP_DEGs.in vivo
Official Gene Symbol	baseMean	log2FoldChange	lfcSE	stat	pvalue	padj
COL3A1	69.7047	6.31835	0.499952	12.6379	1.3e-36	5.26e-34
LYPD6B	39.2649	5.85846	0.549353	10.6643	1.5e-26	2.45e-24
DHRS3	179.497	5.07834	0.365532	13.893	6.99e-44	4.22e-41
TNFSF4	222.113	4.85575	0.320262	15.1618	6.33e-52	6.22e-49
CD24	352.514	4.7867	0.224689	21.3037	1.05e-100	5.5e-97
VCAM1	43.5454	4.32481	0.477167	9.06351	1.26e-19	8.67e-18
INHBB	74.6679	4.25141	0.418051	10.1696	2.71e-24	3.38e-22
ADAMTS14	83.3242	4.15645	0.343711	12.0929	1.15e-33	3.77e-31
ID3	826.833	4.09489	0.25112	16.3065	8.87e-60	1.27e-56
TSPAN8	164.843	3.96376	0.374405	10.5868	3.43e-26	5.39e-24
FPR1	33.3511	3.946	0.511424	7.7157	1.2e-14	3.97e-13
CX3CL1	45.135	3.91868	0.473153	8.28205	1.21e-16	5.66e-15
STRA6	29.3599	3.86018	0.514215	7.50693	6.05e-14	1.8e-12
SPP1	10.8148	3.84264	0.611813	6.28075	3.37e-10	5.13e-09
LAIR2	19.1335	3.83918	0.590753	6.49879	8.1e-11	1.4e-09
APOBEC3G	190.973	3.76511	0.36368	10.3528	4.06e-25	5.7e-23
SORBS1	30.7817	3.69729	0.490531	7.53733	4.8e-14	1.44e-12
MUC15	12.7759	3.69302	0.594376	6.21327	5.19e-10	7.64e-09
TNFRSF1B	46.2099	3.60732	0.481265	7.49549	6.61e-14	1.94e-12
HLA-DRA	276.627	3.59894	0.31683	11.3592	6.67e-30	1.54e-27
BMP5	34.4175	3.58789	0.456999	7.85098	4.13e-15	1.48e-13
RNF43	26.0038	3.54322	0.520977	6.80111	1.04e-11	2.15e-10
SPRR2E	29.0165	3.4864	0.57057	6.11038	9.94e-10	1.38e-08
PLXNB1	38.5645	3.46213	0.456942	7.57673	3.54e-14	1.08e-12
SLC12A7	303.588	3.37841	0.233028	14.4979	1.25e-47	8.54e-45
BIK	173.45	3.32812	0.515631	6.45446	1.09e-10	1.83e-09
PLEKHG1	18.6764	3.25242	0.560466	5.80307	6.51e-09	7.8e-08
DCLK1	300.452	3.25099	0.241929	13.4378	3.63e-41	1.97e-38
GDF15	98.2814	3.23173	0.371007	8.71071	3.02e-18	1.79e-16
F13A1	64.08	3.15785	0.352184	8.96647	3.06e-19	2e-17
EDN2	73.5814	3.15717	0.430951	7.32604	2.37e-13	6.41e-12
PITX2	13.9761	3.11119	0.610113	5.09936	3.41e-07	2.87e-06
HES6	31.0478	3.10821	0.483581	6.42748	1.3e-10	2.15e-09
SUGCT	25.9599	3.10069	0.516501	6.00326	1.93e-09	2.55e-08
LGR6	12.2851	3.0968	0.588044	5.26627	1.39e-07	1.28e-06
LOC643201	150.154	3.08414	0.373295	8.26193	1.43e-16	6.64e-15
NXN	160.366	3.04912	0.264214	11.5404	8.26e-31	2.13e-28
UBD	86.8442	3.02958	0.443024	6.8384	8.01e-12	1.68e-10
LPHN3	96.1256	3.00295	0.373453	8.04103	8.91e-16	3.57e-14
TGFB2	503.273	2.99952	0.192142	15.6109	6.14e-55	8.03e-52
LSR	64.1026	2.99602	0.365327	8.20092	2.39e-16	1.06e-14
CTHRC1	499.157	2.97982	0.222082	13.4177	4.76e-41	2.41e-38
CSF3	50.6597	2.97468	0.444022	6.6994	2.09e-11	4.07e-10
TNFRSF11B	994.851	2.97026	0.270686	10.9731	5.15e-28	9.99e-26
GUCY1A2	34.6898	2.96767	0.439658	6.74996	1.48e-11	2.98e-10
GPRC5B	112.581	2.922	0.332837	8.77908	1.65e-18	1.01e-16
DHH	22.9054	2.91383	0.525339	5.54657	2.91e-08	3.03e-07
COX7B2	90.7608	2.88051	0.384632	7.489	6.94e-14	2.03e-12
SNN	35.7785	2.87223	0.486522	5.9036	3.56e-09	4.45e-08
ID1	1634.74	2.83459	0.194696	14.559	5.12e-48	3.66e-45
FAM110B	37.432	2.82563	0.453176	6.23516	4.51e-10	6.75e-09
SOBP	129.482	2.7751	0.281863	9.84556	7.16e-23	7.61e-21
SERPINF2	65.6329	2.75879	0.348036	7.92673	2.25e-15	8.48e-14
TTC39C	1788.38	2.73788	0.1777	15.4073	1.46e-53	1.64e-50
SCG2	194.124	2.73196	0.284936	9.58797	8.98e-22	8.25e-20
ZNF812	22.1182	2.71725	0.563685	4.82052	1.43e-06	1.05e-05
LOC101927229	13.5913	2.71567	0.608293	4.46441	8.03e-06	4.99e-05
EFNA2	10.4992	2.70453	0.594504	4.54922	5.38e-06	3.5e-05
JAG2	23.3156	2.68961	0.558931	4.81207	1.49e-06	1.1e-05
CEMIP	29.8789	2.68389	0.561627	4.77878	1.76e-06	1.28e-05
ADM5	53.1405	2.68241	0.407935	6.57557	4.85e-11	8.81e-10
TINAGL1	400.629	2.66902	0.238702	11.1814	5.03e-29	1.11e-26
SPATS1	12.9065	2.65808	0.587338	4.52565	6.02e-06	3.86e-05
TMLHE	35.5738	2.65562	0.454102	5.84807	4.97e-09	6.1e-08
KREMEN1	33.1186	2.63697	0.522529	5.04656	4.5e-07	3.7e-06
SEMA6B	106.848	2.62846	0.305372	8.60742	7.47e-18	4.18e-16
CLDN4	1340.08	2.62503	0.22818	11.5042	1.26e-30	3.13e-28
NEBL	68.0956	2.60457	0.369691	7.04528	1.85e-12	4.3e-11
HLA-DPA1	44.7581	2.59628	0.478171	5.42959	5.65e-08	5.54e-07
FAM20C	688.8	2.59149	0.210391	12.3175	7.29e-35	2.55e-32
SOX5	25.3829	2.58176	0.515907	5.00431	5.61e-07	4.51e-06
SCN5A	424.525	2.57213	0.175411	14.6635	1.1e-48	8.26e-46
LOC101928137	13.3395	2.53062	0.58676	4.31287	1.61e-05	9.44e-05
RASSF9	13.2851	2.50756	0.60141	4.16948	3.05e-05	0.000167197
SAA1	71.1045	2.49676	0.369711	6.75328	1.45e-11	2.92e-10
CDK20	19.4809	2.49019	0.570503	4.3649	1.27e-05	7.61e-05
SDK1	31.4132	2.48491	0.546984	4.54294	5.55e-06	3.6e-05
SPARC	307.914	2.47305	0.230526	10.7278	7.53e-27	1.32e-24
PLLP	81.3527	2.44511	0.392992	6.22178	4.92e-10	7.27e-09
ISM1	46.6061	2.42878	0.445686	5.44953	5.05e-08	5e-07
CDH18	141	2.42571	0.335608	7.2278	4.91e-13	1.25e-11
ADAP1	25.1526	2.41884	0.511624	4.72777	2.27e-06	1.6e-05
LPAR2	48.75	2.39716	0.394638	6.07431	1.25e-09	1.71e-08
MX1	86.339	2.3892	0.334122	7.15067	8.64e-13	2.13e-11
MAL2	53.8183	2.37823	0.366566	6.48785	8.71e-11	1.49e-09
C16orf54	14.9204	2.36816	0.556217	4.25761	2.07e-05	0.000118397
HSPB8	10.2705	2.3357	0.592827	3.93994	8.15e-05	0.000399676
COLGALT2	231.705	2.33416	0.253807	9.19662	3.69e-20	2.83e-18
CHRNA1	11.9843	2.3325	0.600912	3.88159	0.000103775	0.000497712
ARNT2	50.4334	2.31008	0.358067	6.45155	1.11e-10	1.85e-09
IL20RA	31.8875	2.30546	0.495827	4.64973	3.32e-06	2.27e-05
DPYSL3	246.907	2.29942	0.206116	11.156	6.7e-29	1.46e-26
PCSK5	132.204	2.28769	0.281319	8.13204	4.22e-16	1.78e-14
STAB2	70.4468	2.28141	0.313495	7.27733	3.4e-13	8.95e-12
MDGA2	16.7826	2.27553	0.506006	4.49704	6.89e-06	4.36e-05
MORC2-AS1	58.7325	2.26831	0.345441	6.56642	5.15e-11	9.31e-10
LRRN1	29.3821	2.26606	0.4439	5.10488	3.31e-07	2.8e-06
PRSS22	34.0147	2.25752	0.469247	4.81094	1.5e-06	1.1e-05
UBE2S	5025.82	2.25084	0.166387	13.5277	1.07e-41	6.02e-39
TDRD1	38.3916	2.24555	0.467068	4.80775	1.53e-06	1.12e-05
SDR16C5	481.509	2.24445	0.246134	9.11881	7.6e-20	5.42e-18
METRNL	66.5262	2.24291	0.345519	6.49142	8.5e-11	1.46e-09
PIF1	229.784	2.23687	0.211167	10.5929	3.21e-26	5.1e-24
LOC101928100	98.2846	2.23511	0.272192	8.21152	2.18e-16	9.83e-15
TUBB4B	5270.19	2.23468	0.269341	8.29687	1.07e-16	5.04e-15
KLRC2	264.378	2.23294	0.308866	7.22948	4.85e-13	1.24e-11
ATP6V0B	12384.6	2.21905	0.157432	14.0953	4.06e-45	2.66e-42
CERS4	13.1202	2.2173	0.576356	3.8471	0.000119522	0.000564453
PPAP2B	308.1	2.20909	0.200635	11.0105	3.4e-28	6.85e-26
GGACT	13.2346	2.20744	0.557464	3.95979	7.5e-05	0.000371924
ELF3	13.3295	2.20355	0.587662	3.74968	0.000177058	0.000802866
F2RL3	34.3142	2.20152	0.463635	4.74839	2.05e-06	1.46e-05
FRAS1	136.062	2.1987	0.308688	7.12272	1.06e-12	2.55e-11
ANKRD1	1857.3	2.19617	0.186439	11.7796	4.97e-32	1.5e-29
TRNP1	45.741	2.19209	0.490103	4.47271	7.72e-06	4.82e-05
FLVCR2	149.465	2.18281	0.28481	7.66411	1.8e-14	5.77e-13
LOC339166	13.9212	2.18231	0.570162	3.82753	0.000129438	0.000605997
MX2	27.7963	2.18216	0.523187	4.17091	3.03e-05	0.000166268
PIK3C2B	43.0002	2.18136	0.435918	5.00405	5.61e-07	4.51e-06
GUCY1B2	19.7882	2.17895	0.6011	3.62493	0.000289042	0.00124049
PPAP2C	1240.9	2.17141	0.155709	13.9453	3.36e-44	2.11e-41
NRXN3	136.665	2.16941	0.336134	6.45399	1.09e-10	1.83e-09
NUDT16L1	1178.34	2.16209	0.195326	11.0691	1.77e-28	3.71e-26
NCS1	116.892	2.15154	0.276898	7.77013	7.84e-15	2.66e-13
SYTL5	119.93	2.13626	0.612063	3.49026	0.000482546	0.00196878
KRT81	247.515	2.13309	0.21128	10.0961	5.75e-24	6.85e-22
DUSP2	58.9425	2.12442	0.412792	5.14647	2.65e-07	2.29e-06
HSD17B3	106.362	2.12346	0.417658	5.08421	3.69e-07	3.09e-06
SPINK5	23.5217	2.11992	0.46664	4.54296	5.55e-06	3.6e-05
FAM198B	21.3532	2.11789	0.553559	3.82596	0.000130265	0.000609087
SPNS2	67.0278	2.115	0.387441	5.45889	4.79e-08	4.78e-07
IGSF3	147.483	2.11439	0.257623	8.20732	2.26e-16	1.01e-14
C4BPB	185.451	2.10762	0.376739	5.59438	2.21e-08	2.37e-07
DPH2	631.249	2.09462	0.228162	9.18041	4.29e-20	3.24e-18
FAM46B	44.1758	2.09359	0.466725	4.48571	7.27e-06	4.57e-05
STON2	25.7656	2.09223	0.510338	4.0997	4.14e-05	0.000219587
C9orf89	4586.2	2.08554	0.188977	11.036	2.56e-28	5.28e-26
RARRES3	248.648	2.0772	0.20586	10.0903	6.1e-24	7.2e-22
MAP2	91.8662	2.06579	0.284943	7.24986	4.17e-13	1.08e-11
B4GALNT4	37.0764	2.06519	0.488528	4.22738	2.36e-05	0.000133865
C10orf54	108.217	2.0651	0.316462	6.5256	6.77e-11	1.19e-09
RPS6KA2	44.0474	2.05504	0.527618	3.89495	9.82e-05	0.000474107
BMP4	3488.41	2.05376	0.212736	9.65406	4.72e-22	4.58e-20
SLC3A2	2905.25	2.05339	0.199125	10.3121	6.21e-25	8.49e-23
ALOX5AP	33.1782	2.03318	0.455081	4.46773	7.91e-06	4.93e-05
DIRAS3	49.0278	2.03126	0.448082	4.53323	5.81e-06	3.74e-05
USP18	22.0387	2.02265	0.556316	3.63579	0.000277127	0.00119523
MIEF2	132.265	2.02211	0.315843	6.40227	1.53e-10	2.5e-09
KRT17	20.4987	2.014	0.545818	3.68988	0.000224364	0.000989113
LSM10	1268.12	2.01231	0.173007	11.6314	2.85e-31	7.87e-29
ACOT4	50.564	2.01161	0.390375	5.15302	2.56e-07	2.21e-06
TYSND1	300.449	2.01055	0.231386	8.68917	3.65e-18	2.12e-16
NOTCH3	21.7116	2.0099	0.494519	4.06435	4.82e-05	0.000251013
CARD10	440.22	2.00607	0.271186	7.39741	1.39e-13	3.89e-12
AQP1	66.4136	2.0046	0.462761	4.33182	1.48e-05	8.73e-05
CDC20	4374.07	2.0009	0.213652	9.36526	7.59e-21	6.37e-19
NFATC1	59.2287	1.99988	0.398164	5.02275	5.09e-07	4.14e-06
PITX1	829.568	1.99836	0.165136	12.1013	1.04e-33	3.47e-31
MESP1	38.8891	1.9946	0.397876	5.01311	5.36e-07	4.32e-06
SSTR2	69.9038	1.99275	0.34487	5.77826	7.55e-09	8.96e-08
EMC9	859.442	1.98649	0.191824	10.3558	3.94e-25	5.62e-23
DMD	98.3006	1.98494	0.352065	5.638	1.72e-08	1.88e-07
A4GALT	60.8785	1.98401	0.357425	5.55084	2.84e-08	2.96e-07
CAPN10-AS1	105.02	1.98212	0.3072	6.4522	1.1e-10	1.84e-09
ROR1	687.716	1.9812	0.198942	9.95869	2.31e-23	2.54e-21
OASL	499.524	1.97745	0.240136	8.23472	1.8e-16	8.15e-15
SHROOM2	194.831	1.97682	0.28238	7.00056	2.55e-12	5.76e-11
NLRP2	36.8341	1.97609	0.43105	4.58437	4.55e-06	3.02e-05
SNHG11	332.202	1.97413	0.239369	8.24723	1.62e-16	7.47e-15
PPP1R1C	25.8362	1.9738	0.431039	4.57917	4.67e-06	3.08e-05
SLC7A5	1153.21	1.97122	0.146968	13.4126	5.1e-41	2.5e-38
CABLES1	143.63	1.96739	0.290741	6.76681	1.32e-11	2.68e-10
MEX3A	71.1102	1.96444	0.348936	5.62978	1.8e-08	1.97e-07
JAGN1	2941.24	1.96269	0.212315	9.24423	2.37e-20	1.88e-18
HLA-DMB	22.6701	1.95463	0.530135	3.68704	0.00022688	0.000999646
CYP27A1	173.783	1.94695	0.348132	5.59256	2.24e-08	2.39e-07
TSPAN9	150.706	1.93894	0.24952	7.77068	7.81e-15	2.65e-13
DOLK	359.57	1.936	0.283948	6.81812	9.22e-12	1.92e-10
PSKH1	55.9781	1.93508	0.386133	5.01142	5.4e-07	4.35e-06
TUBA1A	10610.4	1.93207	0.206231	9.36846	7.36e-21	6.22e-19
HTR1F	166.526	1.9307	0.292045	6.61098	3.82e-11	7.04e-10
PIK3R3	166.716	1.92961	0.288327	6.69243	2.19e-11	4.25e-10
STOML1	152.376	1.91768	0.293594	6.53174	6.5e-11	1.15e-09
COL5A1	479.264	1.91685	0.167202	11.4643	1.99e-30	4.9e-28
ASAP3	120.02	1.91265	0.396407	4.82495	1.4e-06	1.03e-05
LLGL2	36.3322	1.91075	0.397703	4.80446	1.55e-06	1.13e-05
DNAH2	82.0746	1.90524	0.328186	5.80538	6.42e-09	7.7e-08
TIGD5	36.986	1.90211	0.442402	4.29951	1.71e-05	9.99e-05
DYNC1I1	37.0724	1.90179	0.513361	3.70459	0.000211736	0.000939771
NINJ2	117.573	1.9017	0.324556	5.85938	4.65e-09	5.72e-08
CACNA2D4	56.9549	1.89985	0.481344	3.94697	7.91e-05	0.000390318
NGFR	55.1493	1.89947	0.389712	4.87403	1.09e-06	8.28e-06
ABHD12	420.356	1.89699	0.209246	9.06585	1.24e-19	8.52e-18
WDR25	96.1463	1.89639	0.330538	5.7373	9.62e-09	1.12e-07
BCAR1	477.851	1.89457	0.220795	8.58071	9.43e-18	5.2e-16
BHLHE41	219.151	1.88312	0.236235	7.97138	1.57e-15	6.07e-14
UBTD1	269.774	1.88194	0.332784	5.65513	1.56e-08	1.73e-07
RHBDL1	17.6404	1.88087	0.517292	3.636	0.000276908	0.00119461
LOXL4	91.1078	1.87766	0.374434	5.01467	5.31e-07	4.29e-06
UBB	14968	1.87506	0.169917	11.0351	2.59e-28	5.28e-26
GABRE	19.0452	1.87392	0.60156	3.1151	0.00183884	0.00640759
SREBF1	831.148	1.87117	0.200574	9.32907	1.07e-20	8.74e-19
ANAPC2	544.75	1.86919	0.219433	8.51826	1.62e-17	8.66e-16
C1orf53	295.033	1.86589	0.204292	9.13346	6.63e-20	4.8e-18
H1FX-AS1	155.355	1.86486	0.265664	7.0196	2.22e-12	5.1e-11
NELFB	384.631	1.85231	0.204232	9.06966	1.19e-19	8.26e-18
CHMP1A	709.674	1.85009	0.208262	8.88347	6.48e-19	4.14e-17
ZBTB46	44.3825	1.8458	0.361813	5.10153	3.37e-07	2.84e-06
CENPV	218.784	1.84461	0.227779	8.09826	5.58e-16	2.28e-14
C4orf19	34.7374	1.84357	0.555749	3.31727	0.000909005	0.00345567
NUBP2	929.736	1.83635	0.214008	8.58077	9.42e-18	5.2e-16
PRKCZ	15.2152	1.83488	0.594475	3.08656	0.00202489	0.00696784
H1FX	760.156	1.83358	0.166595	11.0062	3.57e-28	7.01e-26
PLEKHO2	195.232	1.83253	0.23234	7.88729	3.09e-15	1.14e-13
FHL2	761.56	1.82894	0.172923	10.5766	3.83e-26	5.95e-24
CEBPD	195.741	1.82765	0.269445	6.78302	1.18e-11	2.41e-10
POMGNT2	183.287	1.8094	0.287261	6.29881	3e-10	4.64e-09
MAD2L2	995.163	1.80477	0.220438	8.18722	2.67e-16	1.17e-14
LINC01122	11.3087	1.80381	0.616841	2.92427	0.00345264	0.0111255
FAM109B	63.6869	1.80253	0.385406	4.67696	2.91e-06	2.01e-05
FAM132B	13.2496	1.80239	0.56103	3.21264	0.00131522	0.00477296
RASSF2	77.6832	1.80065	0.354238	5.08317	3.71e-07	3.11e-06
TIMM17B	1462.12	1.79938	0.179822	10.0065	1.43e-23	1.65e-21
ARTN	117.717	1.7989	0.337602	5.32847	9.9e-08	9.3e-07
NSUN5	398.283	1.79839	0.311901	5.7659	8.12e-09	9.56e-08
SERPINA5	26.7859	1.79758	0.585833	3.06841	0.00215201	0.00734573
PIM3	673.086	1.79158	0.235644	7.60293	2.89e-14	8.92e-13
GCHFR	94.7342	1.78466	0.313239	5.69744	1.22e-08	1.38e-07
MRPS15	1776.33	1.78192	0.193803	9.19449	3.77e-20	2.87e-18
OSR2	70.7228	1.77884	0.330784	5.37766	7.55e-08	7.2e-07
TRIM47	495.816	1.7785	0.190215	9.34999	8.77e-21	7.25e-19
GNB1L	111.567	1.77293	0.400073	4.43152	9.36e-06	5.74e-05
COQ6	763.944	1.77266	0.256907	6.90002	5.2e-12	1.12e-10
HLA-DRB1	24.471	1.77133	0.476591	3.71666	0.000201874	0.000902372
ERI3	630.757	1.76926	0.297245	5.9522	2.65e-09	3.4e-08
AXIN2	129.631	1.76877	0.274092	6.45323	1.09e-10	1.83e-09
SLC6A9	108.237	1.76286	0.332192	5.30674	1.12e-07	1.04e-06
ECHDC3	247.134	1.76081	0.285667	6.16386	7.1e-10	1.01e-08
FAM64A	783.509	1.76057	0.182742	9.63413	5.74e-22	5.5e-20
SLC5A10	130.313	1.75989	0.332565	5.29185	1.21e-07	1.12e-06
CNN2	838.125	1.75781	0.147419	11.9239	8.88e-33	2.74e-30
TMEM171	3177.58	1.75699	0.253784	6.92314	4.42e-12	9.6e-11
SH3PXD2B	80.3129	1.75519	0.352116	4.98467	6.21e-07	4.96e-06
LOC441204	10.228	1.7531	0.603482	2.90497	0.00367289	0.0117103
TPD52L1	39.792	1.75048	0.427418	4.09548	4.21e-05	0.000223149
C9orf116	83.1813	1.75033	0.362742	4.82527	1.4e-06	1.03e-05
SPINT1	23.6274	1.75022	0.52849	3.31173	0.000927212	0.00351808
JDP2	29.1901	1.74924	0.469544	3.7254	0.000195007	0.000876166
FBXO44	23.7046	1.7468	0.511665	3.41394	0.000640295	0.00253664
C10orf85	47.1533	1.7431	0.369135	4.72213	2.33e-06	1.64e-05
BCHE	63.1958	1.74143	0.394025	4.41959	9.89e-06	6.04e-05
PRR7	80.8501	1.74106	0.376759	4.62116	3.82e-06	2.57e-05
DDR1	315.484	1.7406	0.257875	6.74977	1.48e-11	2.98e-10
PWWP2B	84.3184	1.7403	0.350552	4.96446	6.89e-07	5.45e-06
MRPL37	3453.82	1.73993	0.2034	8.55419	1.19e-17	6.45e-16
OSR1	133.3	1.73884	0.365454	4.75802	1.95e-06	1.4e-05
GEMIN7	1757.7	1.73851	0.162643	10.6891	1.14e-26	1.93e-24
CXXC5	339.621	1.73689	0.210701	8.24341	1.67e-16	7.67e-15
TMEM234	161.051	1.7366	0.289726	5.99394	2.05e-09	2.68e-08
EVA1C	373.86	1.73599	0.230866	7.51949	5.5e-14	1.65e-12
THAP11	796.476	1.73483	0.190833	9.09085	9.83e-20	6.96e-18
RPP25	431.642	1.73366	0.241271	7.18554	6.69e-13	1.66e-11
CPE	215.851	1.72879	0.268779	6.43202	1.26e-10	2.09e-09
EFNA4	66.5069	1.72721	0.3562	4.84899	1.24e-06	9.29e-06
PSMB3	11242.7	1.72545	0.14654	11.7747	5.27e-32	1.56e-29
EHD1	1786.86	1.72511	0.186071	9.27125	1.84e-20	1.47e-18
C5orf56	283.468	1.72424	0.23334	7.3894	1.47e-13	4.12e-12
SLC9A2	23.8121	1.72342	0.524841	3.28371	0.00102452	0.00384091
PBX1	145.895	1.72271	0.270605	6.36614	1.94e-10	3.11e-09
TMEM223	1086.11	1.72024	0.186938	9.2022	3.51e-20	2.73e-18
E2F2	395.9	1.71868	0.283056	6.07187	1.26e-09	1.73e-08
TSPAN4	665.226	1.71652	0.286271	5.99612	2.02e-09	2.65e-08
TSKU	235.906	1.715	0.235732	7.27519	3.46e-13	9.07e-12
ARHGEF4	16.1562	1.71471	0.509576	3.36498	0.000765495	0.00296681
GJB2	1111.27	1.71322	0.206244	8.30679	9.83e-17	4.68e-15
ADPRHL1	97.2389	1.71239	0.318059	5.38388	7.29e-08	6.98e-07
ST6GAL1	70.5249	1.71078	0.357319	4.78782	1.69e-06	1.22e-05
PLXNA1	1909.6	1.70636	0.165259	10.3253	5.41e-25	7.53e-23
DDX56	1813.02	1.70283	0.185779	9.16591	4.91e-20	3.66e-18
ST3GAL4	277.872	1.70279	0.543029	3.13573	0.00171428	0.00604324
LINC01088	35.7141	1.70091	0.452068	3.76251	0.000168213	0.0007663
PPP1R14C	18.9088	1.70066	0.579951	2.93243	0.00336325	0.0108664
ABCC3	179.539	1.70018	0.229302	7.41459	1.22e-13	3.45e-12
LOC101926896	16.1758	1.69965	0.557925	3.04637	0.00231625	0.00783653
B3GALT6	264.274	1.6984	0.231698	7.33024	2.3e-13	6.25e-12
MIRLET7BHG	172.162	1.69826	0.269467	6.3023	2.93e-10	4.55e-09
EFNA1	58.803	1.69816	0.389816	4.35632	1.32e-05	7.89e-05
UAP1L1	166.553	1.69754	0.245465	6.9156	4.66e-12	1.01e-10
SNAI3-AS1	14.3025	1.6935	0.540378	3.13391	0.00172491	0.00607323
HYAL2	853.284	1.69341	0.215328	7.86434	3.71e-15	1.34e-13
PPL	167.695	1.69173	0.30997	5.45773	4.82e-08	4.8e-07
LINC00326	16.4859	1.68925	0.578622	2.91944	0.00350666	0.0112705
SRA1	963.041	1.68542	0.211863	7.95521	1.79e-15	6.84e-14
NUDT17	48.4701	1.68169	0.447168	3.76077	0.000169392	0.000770997
F12	19.3754	1.6801	0.499056	3.36656	0.000761123	0.00295278
TIMP4	31.1348	1.67812	0.563117	2.98006	0.00288194	0.00948494
TEAD2	153.557	1.67648	0.24918	6.72797	1.72e-11	3.4e-10
GPM6B	110.378	1.67585	0.393497	4.25887	2.05e-05	0.000117775
THRB	76.6113	1.67389	0.396435	4.22237	2.42e-05	0.000136583
KLHL21	625.976	1.67386	0.190417	8.79053	1.49e-18	9.21e-17
PLCB4	102.419	1.67259	0.318357	5.2538	1.49e-07	1.36e-06
PTPRU	168.97	1.67155	0.246227	6.78863	1.13e-11	2.32e-10
BID	1356.08	1.66943	0.175097	9.53434	1.51e-21	1.37e-19
OLFML2A	281.078	1.66935	0.263314	6.33975	2.3e-10	3.65e-09
FCGBP	11.7656	1.66612	0.606615	2.74658	0.00602199	0.0179608
RGS16	29.5842	1.66546	0.467886	3.55954	0.0003715	0.00155571
TCF7	45.5981	1.66429	0.442385	3.76208	0.000168507	0.000767192
COL1A1	64.7489	1.66378	0.326384	5.09761	3.44e-07	2.9e-06
SIVA1	5049.21	1.66357	0.164623	10.1053	5.23e-24	6.28e-22
PAPPA	207.414	1.66131	0.236882	7.01323	2.33e-12	5.32e-11
LSAMP	61.7973	1.66129	0.346526	4.79413	1.63e-06	1.19e-05
IRF1	794.867	1.66016	0.250749	6.62081	3.57e-11	6.65e-10
C1orf106	14.6319	1.65509	0.552626	2.99496	0.00274478	0.00910024
SPTB	246.951	1.6538	0.248068	6.66671	2.62e-11	5.01e-10
ZNF114	48.577	1.65336	0.369022	4.48038	7.45e-06	4.68e-05
TMEM9	813.67	1.65249	0.19936	8.28898	1.14e-16	5.37e-15
BDNF	345.318	1.65245	0.194162	8.51066	1.73e-17	9.21e-16
SLC25A19	57.0924	1.64955	0.450369	3.66266	0.000249613	0.00109063
GEMIN8	58.8812	1.64875	0.421669	3.91005	9.23e-05	0.000448034
CDH4	80.3251	1.6483	0.368297	4.47546	7.62e-06	4.77e-05
CTDSP1	1167.32	1.64725	0.169048	9.74428	1.95e-22	2.02e-20
TMPRSS2	50.0337	1.64555	0.622465	2.6436	0.00820303	0.0235753
MED27	1030.42	1.64498	0.226226	7.27141	3.56e-13	9.32e-12
PNPLA4	202.103	1.64432	0.238789	6.88608	5.74e-12	1.23e-10
CRTAM	12.2701	1.64208	0.560721	2.92852	0.00340578	0.0109903
PDLIM3	199.504	1.64153	0.26724	6.14253	8.12e-10	1.15e-08
SALL2	24.6868	1.63259	0.477823	3.41672	0.00063381	0.00251285
TMEM203	1761.04	1.63099	0.204843	7.96214	1.69e-15	6.51e-14
PNPLA3	81.1862	1.62975	0.336909	4.83736	1.32e-06	9.79e-06
LYPD1	15.0035	1.62908	0.52528	3.10135	0.0019264	0.00667127
GLUL	838.731	1.62882	0.152374	10.6896	1.14e-26	1.93e-24
C9orf3	2175.48	1.62151	0.206166	7.86507	3.69e-15	1.34e-13
CASC15	49.3923	1.61925	0.428535	3.77856	0.000157738	0.000724036
PEF1	1567.83	1.619	0.231319	6.999	2.58e-12	5.82e-11
MAP6D1	45.9353	1.61591	0.425287	3.79957	0.000144948	0.000670421
LOC101929690	10.6674	1.61387	0.587297	2.74797	0.00599662	0.0179089
FAM65C	30.6302	1.61154	0.465058	3.46524	0.000529761	0.00214085
RGS14	79.3008	1.60987	0.400009	4.02458	5.71e-05	0.000291638
METTL1	467.781	1.60962	0.228219	7.05294	1.75e-12	4.1e-11
KBTBD4	52.1676	1.6084	0.408125	3.94096	8.12e-05	0.000398426
MRPL53	1253.77	1.60647	0.212901	7.54561	4.5e-14	1.36e-12
STK11	163.009	1.60292	0.273017	5.87113	4.33e-09	5.35e-08
MSX2	18.3447	1.60031	0.529458	3.02255	0.00250657	0.00840444
TAF6L	369.316	1.59701	0.338983	4.71117	2.46e-06	1.72e-05
LTBP3	117.867	1.59479	0.326688	4.88168	1.05e-06	8e-06
SLC37A2	169.337	1.5938	0.242761	6.56531	5.19e-11	9.36e-10
PGP	500.89	1.59367	0.176217	9.0438	1.51e-19	1.02e-17
MISP	29.7021	1.59347	0.450796	3.53479	0.000408095	0.00169316
TRAF4	138.949	1.59329	0.277814	5.73509	9.75e-09	1.13e-07
LAMA4	59.6239	1.59191	0.363505	4.37934	1.19e-05	7.15e-05
GADD45B	661.193	1.59147	0.147288	10.8051	3.25e-27	5.88e-25
NME3	245.023	1.59016	0.248606	6.39633	1.59e-10	2.59e-09
HES2	20.9476	1.58835	0.507967	3.12687	0.00176677	0.00619216
HIST2H2AC	24.5326	1.58549	0.473253	3.3502	0.000807525	0.00310824
TMEM86B	294.126	1.58445	0.277688	5.70586	1.16e-08	1.32e-07
DTYMK	2457.81	1.57871	0.160293	9.84891	6.93e-23	7.41e-21
FZR1	200.878	1.57344	0.255788	6.15134	7.68e-10	1.09e-08
AKR1C3	361.53	1.5697	0.31473	4.98743	6.12e-07	4.9e-06
PGAP3	157.663	1.56946	0.259777	6.04158	1.53e-09	2.06e-08
ZNHIT2	114.696	1.56859	0.347481	4.51418	6.36e-06	4.06e-05
TYRO3	79.5553	1.56652	0.339561	4.61337	3.96e-06	2.66e-05
PPP1R3F	67.8465	1.56578	0.341496	4.58506	4.54e-06	3.01e-05
RTP4	88.2846	1.56531	0.355156	4.40739	1.05e-05	6.37e-05
LINC00857	88.9726	1.56467	0.34731	4.50511	6.63e-06	4.22e-05
TNFSF10	1755.47	1.5612	0.203709	7.66386	1.8e-14	5.77e-13
TMEM200B	39.2063	1.55942	0.385825	4.04178	5.3e-05	0.000273992
SHISA2	182.303	1.55916	0.527204	2.95741	0.00310233	0.0101338
TMEM222	805.903	1.55743	0.188959	8.24216	1.69e-16	7.68e-15
BAK1	415.273	1.55686	0.247569	6.2886	3.2e-10	4.91e-09
CBX6	452.866	1.55634	0.190475	8.17081	3.06e-16	1.32e-14
WRAP53	662.854	1.55626	0.188185	8.26985	1.34e-16	6.23e-15
SDC2	1114.99	1.55584	0.175243	8.87818	6.8e-19	4.32e-17
LINC00339	60.4009	1.55555	0.420067	3.70309	0.000212988	0.000944528
PRKG1-AS1	12.5321	1.5538	0.557475	2.78721	0.00531641	0.0161475
ANKRD22	87.2995	1.55308	0.346482	4.48241	7.38e-06	4.64e-05
HIP1R	168.072	1.55249	0.256244	6.05866	1.37e-09	1.87e-08
ATP9A	47.8837	1.55205	0.33755	4.59799	4.27e-06	2.85e-05
TGM2	3301.76	1.55118	0.160764	9.64881	4.97e-22	4.79e-20
FREM2	40.1206	1.55	0.409711	3.78316	0.000154849	0.000712116
RNF126	406.546	1.54807	0.231296	6.69302	2.19e-11	4.24e-10
PLBD1	138.275	1.54145	0.286157	5.38672	7.18e-08	6.89e-07
GRWD1	1075.58	1.54123	0.188315	8.18435	2.74e-16	1.19e-14
LRRC41	517.537	1.54091	0.214351	7.18872	6.54e-13	1.63e-11
TPPP	21.0195	1.53952	0.559252	2.75282	0.00590836	0.0176857
MXD3	205.761	1.53914	0.261711	5.88108	4.08e-09	5.05e-08
SLC25A11	1675.93	1.53769	0.200853	7.6558	1.92e-14	6.12e-13
ARSG	24.5721	1.53732	0.467216	3.29038	0.00100051	0.00376076
C16orf74	122.175	1.53608	0.282527	5.43694	5.42e-08	5.33e-07
GNB2	516.313	1.5339	0.211223	7.26196	3.82e-13	9.94e-12
PPARG	352.032	1.53328	0.227223	6.74789	1.5e-11	3.01e-10
DNMT3A	502.807	1.53192	0.169539	9.03582	1.63e-19	1.1e-17
TM7SF2	80.8727	1.53096	0.306668	4.99222	5.97e-07	4.78e-06
CNP	1798.35	1.53019	0.168425	9.08527	1.03e-19	7.26e-18
TLCD1	498.936	1.52777	0.211912	7.20944	5.62e-13	1.42e-11
CIITA	16.859	1.52745	0.545501	2.80008	0.00510893	0.0156019
UFD1L	2845.79	1.52628	0.150528	10.1395	3.69e-24	4.5e-22
MRPL49	834.63	1.52566	0.247614	6.16145	7.21e-10	1.03e-08
AGER	164.685	1.5241	0.281687	5.41061	6.28e-08	6.1e-07
NMU	314.736	1.52329	0.176234	8.64354	5.45e-18	3.09e-16
GNB3	11.3955	1.52101	0.594587	2.5581	0.0105247	0.029242
SAC3D1	494.989	1.51922	0.183059	8.29911	1.05e-16	4.96e-15
FUCA1	152.16	1.51912	0.306555	4.95545	7.22e-07	5.69e-06
ILDR2	20.164	1.51826	0.523673	2.89925	0.00374051	0.0119018
TXK	46.5808	1.51757	0.430645	3.52396	0.000425151	0.0017552
GBP4	184.155	1.51607	0.285016	5.31923	1.04e-07	9.76e-07
ANAPC11	6586.22	1.51491	0.130707	11.5901	4.62e-31	1.25e-28
EPSTI1	37.6356	1.51164	0.426745	3.54224	0.000396739	0.0016512
SYNGR2	3073.86	1.51057	0.229374	6.58561	4.53e-11	8.29e-10
TNFRSF12A	6306.37	1.51032	0.215123	7.02074	2.21e-12	5.07e-11
GALNT12	26.8989	1.50856	0.496952	3.03563	0.00240034	0.00808624
RCE1	706.83	1.50824	0.231858	6.50501	7.77e-11	1.35e-09
AP2A2	513.085	1.50716	0.2436	6.18702	6.13e-10	8.9e-09
IGFBP7	2683.86	1.50676	0.19439	7.75125	9.1e-15	3.02e-13
INF2	832.717	1.50314	0.173172	8.68001	3.96e-18	2.28e-16
KIF22	1410.96	1.50294	0.150819	9.96517	2.17e-23	2.4e-21
CYB561D2	894.394	1.50265	0.193441	7.768	7.97e-15	2.69e-13
KRT80	583.709	1.50161	0.192133	7.81548	5.48e-15	1.9e-13
RNF166	192.714	1.50002	0.287717	5.21351	1.85e-07	1.65e-06
SLC25A29	194.554	1.49836	0.256014	5.85265	4.84e-09	5.93e-08
PLK2	1800.55	1.49738	0.137854	10.8621	1.75e-27	3.23e-25
WDR90	256.323	1.49634	0.21737	6.88385	5.83e-12	1.25e-10
PIEZO1	783.965	1.49569	0.211686	7.06563	1.6e-12	3.76e-11
HDAC4	174.528	1.49541	0.239522	6.24333	4.28e-10	6.43e-09
FAM43A	317.832	1.49487	0.20633	7.24503	4.32e-13	1.11e-11
PRADC1	310.13	1.49486	0.231256	6.4641	1.02e-10	1.73e-09
SOCS1	51.8183	1.49364	0.465473	3.20885	0.00133265	0.00483125
LOC643733	15.9474	1.49247	0.587609	2.53989	0.0110886	0.0305656
MVK	147.18	1.49242	0.239124	6.24119	4.34e-10	6.5e-09
INTS5	248.723	1.4918	0.225128	6.62645	3.44e-11	6.43e-10
PQLC1	208.115	1.49133	0.225812	6.6043	3.99e-11	7.35e-10
LINC00673	414.919	1.49074	0.215735	6.91007	4.84e-12	1.05e-10
CNPPD1	1073.54	1.49053	0.181926	8.19305	2.55e-16	1.12e-14
TLR8-AS1	15.5646	1.48941	0.514509	2.89482	0.00379372	0.0120491
MAPK12	57.3455	1.48932	0.388362	3.83489	0.000125621	0.000589887
SCN2A	21.3903	1.48849	0.530189	2.80747	0.00499327	0.0152932
TIMM50	2225.94	1.48791	0.212472	7.00288	2.51e-12	5.69e-11
SLC8A1-AS1	46.2686	1.48784	0.401808	3.70286	0.000213182	0.000944858
BRF2	90.9844	1.48581	0.384254	3.86673	0.000110304	0.000525023
UPF1	1176.36	1.48526	0.195658	7.59114	3.17e-14	9.71e-13
OTUB2	128.386	1.48385	0.265883	5.58083	2.39e-08	2.54e-07
DAB2IP	395.257	1.48313	0.210487	7.04618	1.84e-12	4.28e-11
BAMBI	321.768	1.48288	0.243768	6.08315	1.18e-09	1.62e-08
SNHG7	558.51	1.48068	0.168621	8.78109	1.62e-18	9.94e-17
KRT8	1767.19	1.48003	0.207202	7.14296	9.13e-13	2.23e-11
B4GALT2	184.092	1.47996	0.291226	5.08182	3.74e-07	3.13e-06
UCK1	352.296	1.47995	0.212242	6.97292	3.1e-12	6.92e-11
PP7080	121.21	1.47976	0.32129	4.60569	4.11e-06	2.75e-05
SLC2A8	156.342	1.47809	0.261664	5.64881	1.62e-08	1.78e-07
SBNO2	157.206	1.47485	0.295972	4.98309	6.26e-07	5e-06
DDX39A	6684.56	1.47401	0.19362	7.61287	2.68e-14	8.34e-13
PXMP2	486.998	1.47244	0.185121	7.95395	1.81e-15	6.87e-14
ACTR1B	362.403	1.47106	0.224773	6.54464	5.96e-11	1.06e-09
METTL7B	48.4875	1.47096	0.394268	3.73088	0.000190815	0.000859297
ITGB5	715.997	1.46956	0.203844	7.20925	5.63e-13	1.42e-11
FOXA3	30.1471	1.4694	0.471749	3.11478	0.0018408	0.00641302
PLK3	120.319	1.4692	0.290201	5.06271	4.13e-07	3.42e-06
PSMG3	1624.68	1.46791	0.140908	10.4175	2.06e-25	2.97e-23
CYP27B1	25.3733	1.46788	0.485682	3.02231	0.0025085	0.00840734
PPP4C	2715.94	1.46668	0.248197	5.90934	3.43e-09	4.31e-08
C9orf69	164.755	1.46655	0.27134	5.40485	6.49e-08	6.29e-07
CHST15	1146.8	1.46519	0.141501	10.3546	3.99e-25	5.64e-23
CMYA5	25.0355	1.46448	0.466903	3.13657	0.00170935	0.00602994
SNRPB	5814.56	1.46348	0.12721	11.5045	1.25e-30	3.13e-28
PPP2R5B	109.2	1.46337	0.276556	5.29139	1.21e-07	1.12e-06
IMPA2	738.37	1.4623	0.168116	8.69817	3.37e-18	1.98e-16
PPFIA3	12.1768	1.46229	0.598603	2.44284	0.0145722	0.0385711
ZNF496	275.157	1.46226	0.282139	5.18275	2.19e-07	1.91e-06
EREG	1166.46	1.4611	0.175047	8.34686	7.01e-17	3.42e-15
TIMM22	1527.28	1.46061	0.237678	6.14533	7.98e-10	1.13e-08
FAXC	47.5385	1.46039	0.616878	2.3674	0.0179137	0.0459827
IFIT1	565.375	1.45939	0.249301	5.85392	4.8e-09	5.9e-08
POLDIP2	1389.33	1.45898	0.199213	7.32374	2.41e-13	6.51e-12
COQ4	784.154	1.45813	0.222615	6.54999	5.75e-11	1.03e-09
RAB20	83.6691	1.45808	0.345773	4.21686	2.48e-05	0.000139458
S1PR3	122.799	1.45683	0.31833	4.57646	4.73e-06	3.11e-05
LGALSL	88.9234	1.45657	0.295556	4.92823	8.3e-07	6.47e-06
PPP1R35	286.36	1.45468	0.22217	6.5476	5.85e-11	1.05e-09
DPH7	468.186	1.45447	0.189296	7.68356	1.55e-14	5.02e-13
LYPD6	75.8833	1.45425	0.375298	3.87493	0.000106655	0.000510202
LOH12CR1	228.351	1.45358	0.253152	5.74194	9.36e-09	1.09e-07
UNC93B1	83.2685	1.45175	0.355258	4.08646	4.38e-05	0.000231011
ZNF511	968.363	1.45154	0.179201	8.10009	5.49e-16	2.26e-14
RHOT2	431.399	1.45039	0.240587	6.02855	1.65e-09	2.22e-08
TERT	13.7159	1.45027	0.58802	2.46636	0.0136494	0.0364356
DMBT1	25.4874	1.44933	0.461206	3.14248	0.00167524	0.00591892
PHC2	2271.31	1.44867	0.147603	9.81462	9.74e-23	1.03e-20
ARFGAP2	577.665	1.44708	0.187854	7.7032	1.33e-14	4.34e-13
RPS8	12660.2	1.44657	0.169238	8.54751	1.26e-17	6.81e-16
PLEKHJ1	527.189	1.4457	0.220927	6.54379	6e-11	1.07e-09
HMG20B	696.283	1.44542	0.226057	6.39408	1.62e-10	2.62e-09
TPRA1	323.819	1.44508	0.240994	5.99633	2.02e-09	2.64e-08
DGKD	1088.93	1.44483	0.192157	7.519	5.52e-14	1.65e-12
ATRAID	5569.45	1.44348	0.198981	7.25435	4.04e-13	1.05e-11
SLC39A3	486.835	1.44338	0.17235	8.37471	5.54e-17	2.76e-15
CMTM8	451.33	1.44301	0.208597	6.9177	4.59e-12	9.93e-11
FBXO36	150.76	1.44245	0.315024	4.57885	4.68e-06	3.08e-05
IL18	786.282	1.44119	0.193264	7.45708	8.85e-14	2.55e-12
KLF16	125.25	1.44079	0.330838	4.35498	1.33e-05	7.94e-05
NALCN	87.0482	1.44017	0.331988	4.33801	1.44e-05	8.5e-05
CYC1	5427.66	1.43931	0.238998	6.02228	1.72e-09	2.3e-08
UCN	58.9498	1.43925	0.35604	4.04238	5.29e-05	0.000273473
GSN-AS1	118.373	1.43781	0.263464	5.45733	4.83e-08	4.81e-07
KIAA0513	42.5117	1.43732	0.470107	3.05742	0.00223253	0.00758432
MCAT	413.867	1.4358	0.253344	5.66739	1.45e-08	1.61e-07
LINC00466	22.761	1.43497	0.478823	2.99688	0.00272759	0.00905278
PRMT1	1653.98	1.43466	0.379286	3.78251	0.000155252	0.000713669
PTRHD1	1448.58	1.43463	0.15452	9.28445	1.63e-20	1.31e-18
NR2C2AP	318.776	1.43276	0.257595	5.56205	2.67e-08	2.8e-07
KIAA1522	470.078	1.43241	0.202284	7.08116	1.43e-12	3.38e-11
ST3GAL5	65.5829	1.43127	0.321236	4.45552	8.37e-06	5.19e-05
DNAL4	65.0717	1.43063	0.346684	4.12659	3.68e-05	0.000198178
LOC100507377	31.8499	1.42931	0.518092	2.75879	0.00580165	0.017406
ZNF287	39.8328	1.42871	0.54222	2.63492	0.00841565	0.024107
TTLL11	50.1093	1.42837	0.346885	4.11771	3.83e-05	0.000204851
TUBB3	920.726	1.42688	0.15093	9.4539	3.26e-21	2.88e-19
PLA2G15	233.519	1.42684	0.241479	5.90877	3.45e-09	4.33e-08
THSD1	19.0765	1.42601	0.478375	2.98096	0.00287349	0.00946107
LOC101927354	15.4542	1.42521	0.513993	2.77282	0.00555728	0.01678
ST6GALNAC2	86.6432	1.4246	0.394341	3.61261	0.000303126	0.00129351
IL11	119.501	1.42434	0.249046	5.71919	1.07e-08	1.23e-07
PTGFRN	179.817	1.42358	0.250867	5.67464	1.39e-08	1.55e-07
MAGEA11	34.5596	1.42351	0.418366	3.40255	0.000667601	0.00262957
ARFGAP1	911.045	1.42312	0.206923	6.87754	6.09e-12	1.3e-10
C21orf58	262.795	1.42187	0.238933	5.95092	2.67e-09	3.41e-08
SEPW1	1583.32	1.42119	0.148576	9.56536	1.12e-21	1.02e-19
SLC25A25	119.655	1.42068	0.280786	5.05967	4.2e-07	3.46e-06
B3GNT7	284.036	1.42051	0.230292	6.1683	6.9e-10	9.88e-09
TFCP2L1	53.3477	1.41925	0.389145	3.64709	0.00026523	0.0011515
ENTPD6	610.619	1.41747	0.191042	7.41967	1.17e-13	3.35e-12
LSM2	2761.12	1.41728	0.142433	9.9505	2.51e-23	2.74e-21
FSTL3	189.451	1.41712	0.223454	6.3419	2.27e-10	3.61e-09
BCAT2	455.533	1.41615	0.17519	8.08351	6.29e-16	2.56e-14
PDCD2L	936.967	1.41597	0.167217	8.46786	2.5e-17	1.31e-15
SAPCD2	406.205	1.41568	0.261795	5.4076	6.39e-08	6.2e-07
PPP2R4	618.565	1.41511	0.241171	5.86766	4.42e-09	5.45e-08
DEF8	482.574	1.41501	0.182233	7.76483	8.18e-15	2.74e-13
BCAS4	241.571	1.41342	0.256448	5.51153	3.56e-08	3.63e-07
ZDHHC12	538.921	1.4134	0.282418	5.00462	5.6e-07	4.5e-06
COX7A2	9638.46	1.41261	0.169611	8.32852	8.19e-17	3.97e-15
DMPK	206.592	1.41159	0.250614	5.63254	1.78e-08	1.94e-07
LOC101927642	56.7914	1.4109	0.362628	3.89076	9.99e-05	0.000481633
THBS2	117.361	1.40956	0.310655	4.53738	5.7e-06	3.68e-05
BAIAP2L1	251.683	1.40937	0.2557	5.51181	3.55e-08	3.63e-07
CD14	17.0704	1.40934	0.582854	2.418	0.015606	0.040942
WDR27	74.6942	1.40757	0.331471	4.24642	2.17e-05	0.000123922
LOC101927811	15.1328	1.40756	0.512829	2.7447	0.0060566	0.0180503
RPP25L	368.787	1.40606	0.176773	7.95408	1.8e-15	6.87e-14
HPCAL1	1000.55	1.403	0.174321	8.04837	8.39e-16	3.37e-14
NUBP1	457.091	1.40247	0.202398	6.92926	4.23e-12	9.23e-11
APOBEC3F	91.8228	1.40173	0.380471	3.6842	0.000229425	0.00100973
SMC5-AS1	31.2286	1.40145	0.45694	3.06704	0.00216189	0.00737623
CYP39A1	42.6179	1.401	0.48787	2.87167	0.00408303	0.0128511
DVL1	435.865	1.40036	0.235772	5.93945	2.86e-09	3.64e-08
SOX4	9294.89	1.3994	0.156123	8.96347	3.15e-19	2.05e-17
PI4KB	585.39	1.39762	0.253449	5.51439	3.5e-08	3.58e-07
TCF3	746.712	1.39732	0.182521	7.65566	1.92e-14	6.12e-13
HSBP1L1	392.885	1.3969	0.176324	7.92232	2.33e-15	8.74e-14
WTIP	31.2406	1.39554	0.476942	2.92603	0.00343322	0.0110697
FAM89A	221.493	1.39545	0.25345	5.50582	3.67e-08	3.74e-07
DGKZ	134.21	1.39495	0.31488	4.43009	9.42e-06	5.77e-05
SMAD6	35.5174	1.39462	0.456536	3.05478	0.00225226	0.00764309
RAE1	2440.71	1.39332	0.221276	6.29673	3.04e-10	4.69e-09
PLK1	1172.86	1.393	0.205479	6.77926	1.21e-11	2.46e-10
LPHN1	139.574	1.39087	0.253311	5.49076	4e-08	4.05e-07
C11orf71	81.2083	1.39081	0.337319	4.12313	3.74e-05	0.000200773
PSMB9	2766.19	1.39045	0.148521	9.36197	7.83e-21	6.54e-19
SLC10A4	11.3994	1.39024	0.557096	2.4955	0.0125778	0.0340084
TRIP6	542.526	1.38922	0.159855	8.69049	3.61e-18	2.11e-16
ZNF415	60.848	1.38629	0.375142	3.69537	0.00021957	0.000970978
LINC00648	138.283	1.38608	0.267713	5.17747	2.25e-07	1.97e-06
EPHB4	309.879	1.38599	0.206347	6.71681	1.86e-11	3.65e-10
FAM229A	46.8339	1.38441	0.3737	3.7046	0.000211723	0.000939771
SIRT7	566.87	1.38425	0.207868	6.65926	2.75e-11	5.25e-10
TBXAS1	101.665	1.38378	0.27508	5.03045	4.89e-07	3.99e-06
PSD	21.5451	1.38293	0.496267	2.78666	0.00532541	0.0161655
DAGLA	64.4329	1.38203	0.335235	4.12257	3.75e-05	0.000201193
NUP210	86.5973	1.38106	0.350719	3.93781	8.22e-05	0.000402834
LAYN	991.214	1.38086	0.150117	9.19854	3.63e-20	2.79e-18
COMMD7	3081.37	1.38008	0.202912	6.80138	1.04e-11	2.15e-10
AEN	386.287	1.37953	0.175404	7.86486	3.7e-15	1.34e-13
SLC39A13	661.057	1.37919	0.172535	7.99367	1.31e-15	5.15e-14
LYPLA2	1534.42	1.37876	0.246897	5.58438	2.35e-08	2.49e-07
LINC00116	3028.89	1.37792	0.201618	6.83431	8.24e-12	1.72e-10
N6AMT2	215.424	1.3778	0.212756	6.47594	9.42e-11	1.61e-09
ADORA2B	3636.92	1.37645	0.22741	6.05272	1.42e-09	1.94e-08
PPP5C	492.369	1.37569	0.266864	5.15502	2.54e-07	2.2e-06
OR7E14P	47.882	1.37453	0.417136	3.29517	0.000983636	0.00370532
AR	121.773	1.37426	0.326615	4.20759	2.58e-05	0.000144266
SETMAR	105.344	1.37321	0.276243	4.97102	6.66e-07	5.29e-06
URM1	1140.16	1.3724	0.190878	7.18995	6.48e-13	1.62e-11
SLC29A3	38.2997	1.37105	0.518055	2.64653	0.00813227	0.0233847
ARMC6	780.736	1.37088	0.166319	8.24251	1.69e-16	7.68e-15
RNFT2	138.109	1.37085	0.249146	5.50219	3.75e-08	3.81e-07
TGFB3	83.0588	1.37037	0.376953	3.63539	0.000277557	0.00119643
ZNF512B	101.553	1.37021	0.281593	4.86593	1.14e-06	8.6e-06
LOC102724927	27.1463	1.36902	0.529887	2.58362	0.00977703	0.0274364
VARS2	101.755	1.36705	0.338703	4.03613	5.43e-05	0.000279388
POMT1	134.112	1.36632	0.279724	4.88451	1.04e-06	7.91e-06
EIF2B3	972.593	1.36579	0.189135	7.22126	5.15e-13	1.31e-11
TOE1	409.461	1.36573	0.214446	6.36866	1.91e-10	3.07e-09
CDC34	663.967	1.36522	0.209877	6.50487	7.78e-11	1.35e-09
NNMT	446.039	1.36506	0.202609	6.73742	1.61e-11	3.21e-10
UPP1	738.59	1.36448	0.212817	6.41152	1.44e-10	2.37e-09
GNA11	1553.28	1.36438	0.237703	5.73984	9.48e-09	1.1e-07
CNN3	5561.03	1.36405	0.143327	9.51705	1.78e-21	1.61e-19
TMEM259	184.865	1.36384	0.245218	5.56174	2.67e-08	2.8e-07
ATP7B	11.0068	1.36364	0.567252	2.40394	0.0162193	0.0422896
TPST1	1732.03	1.36346	0.172132	7.92103	2.36e-15	8.81e-14
SBF1	118.437	1.36092	0.299383	4.54575	5.47e-06	3.56e-05
PLAT	3516.26	1.36029	0.141747	9.59665	8.26e-22	7.63e-20
MRPL36	2884.85	1.35964	0.161088	8.44031	3.16e-17	1.62e-15
SDHAF2	1241.75	1.35754	0.185656	7.31213	2.63e-13	7.03e-12
STPG1	275.538	1.35728	0.226542	5.9913	2.08e-09	2.72e-08
XRCC3	163.259	1.35669	0.292175	4.64341	3.43e-06	2.33e-05
GRIK2	62.9272	1.35583	0.429862	3.15411	0.0016099	0.00571761
DOLPP1	537.641	1.35516	0.194392	6.9713	3.14e-12	6.98e-11
LOC100129034	177.769	1.35431	0.242553	5.58355	2.36e-08	2.51e-07
DUS3L	418.786	1.35349	0.193138	7.0079	2.42e-12	5.5e-11
FEM1A	170.484	1.35332	0.243555	5.55655	2.75e-08	2.87e-07
MANBAL	2083.47	1.35212	0.237492	5.69334	1.25e-08	1.41e-07
PUSL1	162.653	1.35199	0.242958	5.56469	2.63e-08	2.76e-07
DENND2D	29.7176	1.35165	0.440127	3.07104	0.00213316	0.00729208
NOL4L	398.513	1.35141	0.171102	7.89827	2.83e-15	1.05e-13
DLK2	125.743	1.35117	0.284682	4.74622	2.07e-06	1.47e-05
TMEM102	38.3148	1.34902	0.423583	3.18477	0.00144868	0.00520861
SLC52A2	1633.47	1.34891	0.220533	6.11657	9.56e-10	1.33e-08
LFNG	176.425	1.34844	0.315724	4.27093	1.95e-05	0.000112401
ESRRA	80.8681	1.34659	0.339402	3.96754	7.26e-05	0.00036207
ECHS1	3028.21	1.34604	0.185595	7.25254	4.09e-13	1.06e-11
ZNF79	24.4137	1.34567	0.501651	2.68248	0.00730792	0.0212555
VRK3	551.096	1.34547	0.237451	5.66632	1.46e-08	1.62e-07
CDK5	502.142	1.34308	0.260621	5.15338	2.56e-07	2.21e-06
FAM89B	672.065	1.34227	0.222464	6.03366	1.6e-09	2.15e-08
CTNNBIP1	261.367	1.34202	0.213264	6.29275	3.12e-10	4.79e-09
CMTM3	1047.65	1.34148	0.18413	7.28549	3.2e-13	8.48e-12
NOP14-AS1	45.946	1.34127	0.407749	3.28944	0.00100388	0.00377252
CRYGS	39.9953	1.3412	0.427908	3.13431	0.00172259	0.00606711
VWA2	29.7005	1.34092	0.479798	2.79476	0.00519386	0.0158335
FAM96B	3037.78	1.34051	0.12746	10.5171	7.2e-26	1.08e-23
METTL12	29.1812	1.34006	0.458814	2.92069	0.00349254	0.0112402
IFFO1	96.0679	1.33838	0.314564	4.2547	2.09e-05	0.000119816
TMEM53	475.148	1.3379	0.213198	6.2754	3.49e-10	5.29e-09
HTRA2	244.903	1.33679	0.282687	4.72888	2.26e-06	1.59e-05
LRRC75A	25.4723	1.33644	0.470112	2.84281	0.00447181	0.0138828
ZNF816	52.4077	1.33642	0.364123	3.67025	0.00024231	0.00106316
SGTA	562.782	1.33637	0.198613	6.7285	1.71e-11	3.39e-10
CTDSPL	2448.27	1.33621	0.134075	9.96618	2.14e-23	2.39e-21
GPRC5A	698.224	1.33566	0.189941	7.03196	2.04e-12	4.73e-11
HSPA12A	70.6708	1.33562	0.39501	3.38123	0.000721628	0.00281555
LAMA5	1274.41	1.33483	0.150366	8.87718	6.86e-19	4.34e-17
TSPAN14	1227.43	1.33471	0.15385	8.67543	4.12e-18	2.36e-16
PPAPDC1A	1324.98	1.33439	0.201161	6.63343	3.28e-11	6.16e-10
TMEM255B	152.037	1.33343	0.269175	4.95375	7.28e-07	5.73e-06
C16orf91	1090.85	1.33301	0.153293	8.69583	3.44e-18	2.02e-16
GPR153	82.5033	1.33301	0.303898	4.38638	1.15e-05	6.95e-05
RAB42	36.9911	1.33287	0.409814	3.25239	0.0011444	0.00422383
MANEAL	364.674	1.3306	0.215454	6.17578	6.58e-10	9.5e-09
FAM86A	48.2796	1.32976	0.452199	2.94065	0.00327524	0.0106208
RGS12	199.387	1.32773	0.252515	5.25803	1.46e-07	1.33e-06
SNX17	2228.7	1.32695	0.201784	6.5761	4.83e-11	8.79e-10
NREP	245.097	1.32693	0.224826	5.90205	3.59e-09	4.48e-08
ITM2C	434.756	1.32652	0.211253	6.2793	3.4e-10	5.17e-09
BTBD6	441.682	1.32543	0.219957	6.02585	1.68e-09	2.25e-08
RAB34	2431.68	1.32496	0.134264	9.86829	5.71e-23	6.15e-21
SERPINC1	69.7232	1.32472	0.32358	4.09395	4.24e-05	0.000224354
ANKEF1	299.251	1.32429	0.232936	5.68523	1.31e-08	1.47e-07
PLXNB2	245.512	1.32423	0.217932	6.07638	1.23e-09	1.69e-08
ASB6	692.149	1.32402	0.179562	7.37364	1.66e-13	4.59e-12
PDCD6	3177.64	1.3236	0.141009	9.38661	6.2e-21	5.26e-19
LOC728613	56.6958	1.32356	0.40336	3.28134	0.00103314	0.00386584
PYGB	2515.45	1.32281	0.185482	7.13175	9.91e-13	2.4e-11
APOBEC3C	1644.35	1.32253	0.399621	3.30946	0.000934759	0.00354329
RNF26	970.826	1.32237	0.167314	7.9035	2.71e-15	1.01e-13
MCRS1	1221.1	1.32219	0.188067	7.03044	2.06e-12	4.76e-11
PTPRN2	82.1194	1.32168	0.413038	3.19991	0.00137471	0.00496654
ISCA2	2767.94	1.32161	0.202418	6.52913	6.62e-11	1.17e-09
TMEM229B	85.8519	1.321	0.333443	3.96171	7.44e-05	0.000369721
XKR8	259.229	1.32088	0.228218	5.7878	7.13e-09	8.53e-08
BCS1L	462.336	1.32082	0.201573	6.55256	5.66e-11	1.01e-09
COMMD9	798.586	1.3205	0.248788	5.30774	1.11e-07	1.03e-06
COMMD5	2295.81	1.32047	0.196013	6.73663	1.62e-11	3.23e-10
GTF3A	2926.78	1.32018	0.185354	7.12247	1.06e-12	2.55e-11
FASN	249.068	1.31969	0.212275	6.21688	5.07e-10	7.48e-09
BRI3BP	135.202	1.3196	0.265541	4.96949	6.71e-07	5.33e-06
DRG2	488.592	1.31877	0.242669	5.43445	5.5e-08	5.4e-07
SLC25A28	558.186	1.31818	0.211702	6.22658	4.77e-10	7.09e-09
RDH5	26.7486	1.31596	0.458481	2.87025	0.00410142	0.0129023
HDDC3	274.946	1.31548	0.251431	5.23197	1.68e-07	1.51e-06
NT5DC3	1807.74	1.31434	0.161936	8.11642	4.8e-16	2e-14
PAQR4	87.7115	1.31378	0.36202	3.62902	0.0002845	0.001223
FADS2	360.778	1.31276	0.216312	6.06885	1.29e-09	1.76e-08
POP7	1374.55	1.3125	0.157798	8.31759	8.98e-17	4.33e-15
YDJC	319.701	1.30903	0.28329	4.62082	3.82e-06	2.57e-05
ENTHD2	197.819	1.30899	0.248414	5.26939	1.37e-07	1.26e-06
TRIM41	228.069	1.30746	0.221464	5.90373	3.55e-09	4.45e-08
GPR161	303.049	1.30623	0.243817	5.35741	8.44e-08	8e-07
SNHG15	1726.59	1.30554	0.142017	9.19282	3.83e-20	2.9e-18
PREB	664.292	1.30516	0.274561	4.75363	2e-06	1.43e-05
RBM38	130.219	1.30437	0.295468	4.41458	1.01e-05	6.18e-05
PATL2	30.9293	1.30378	0.442854	2.94404	0.00323958	0.0105166
TMEM134	453.32	1.30318	0.178567	7.29801	2.92e-13	7.76e-12
MFAP2	2129.76	1.30307	0.251471	5.18179	2.2e-07	1.92e-06
REEP4	798.401	1.30279	0.228056	5.7126	1.11e-08	1.28e-07
FASTK	233.508	1.30113	0.212171	6.13244	8.65e-10	1.22e-08
AAAS	690.986	1.30107	0.201902	6.4441	1.16e-10	1.94e-09
TAP1	162.703	1.30057	0.309005	4.2089	2.57e-05	0.000143537
CTC-338M12.4	216.388	1.3005	0.19817	6.56255	5.29e-11	9.52e-10
CD22	13.4586	1.30016	0.524516	2.47877	0.0131835	0.0354204
GATSL3	65.4002	1.29831	0.314203	4.13207	3.6e-05	0.000193709
CABYR	83.3592	1.29808	0.320168	4.05438	5.03e-05	0.000260665
PSMB4	3056.93	1.2976	0.154652	8.39047	4.84e-17	2.43e-15
DCTPP1	2188.31	1.29728	0.155374	8.34942	6.86e-17	3.37e-15
C21orf33	384.148	1.29724	0.236492	5.48535	4.13e-08	4.17e-07
SLC1A3	102.403	1.29658	0.311471	4.16275	3.14e-05	0.000171719
NXT1	3632.49	1.29575	0.174826	7.41163	1.25e-13	3.52e-12
CYP2J2	28.229	1.29527	0.479063	2.70377	0.00685586	0.0200819
FAM53B	87.4208	1.29523	0.417292	3.10389	0.00190994	0.00662597
IL17RD	322.261	1.29509	0.228592	5.6655	1.47e-08	1.63e-07
TXN2	3245.07	1.29446	0.218832	5.91533	3.31e-09	4.17e-08
TP73-AS1	79.8222	1.2925	0.350242	3.6903	0.000223985	0.000987972
RAB35	396.438	1.29137	0.2404	5.37175	7.8e-08	7.44e-07
ENGASE	48.4942	1.29132	0.417477	3.09316	0.00198041	0.00682671
ILK	2117.69	1.29092	0.283011	4.56138	5.08e-06	3.33e-05
TP53I13	601.924	1.29067	0.220497	5.85344	4.82e-09	5.91e-08
H2AFX	813.743	1.2906	0.17587	7.33839	2.16e-13	5.89e-12
LSM7	1276.99	1.29025	0.187258	6.89021	5.57e-12	1.2e-10
SH2B1	114.585	1.29025	0.281021	4.59128	4.41e-06	2.93e-05
GPN2	307.86	1.28894	0.232578	5.54195	2.99e-08	3.1e-07
MRPS2	1061.61	1.28886	0.207124	6.22268	4.89e-10	7.24e-09
ITPK1	604.724	1.28829	0.243516	5.29036	1.22e-07	1.13e-06
LOC100506801	20.2195	1.28815	0.526325	2.44744	0.0143876	0.0381598
EMILIN2	195.339	1.2835	0.265036	4.84274	1.28e-06	9.56e-06
POLDIP3	1037.01	1.28324	0.141417	9.07411	1.15e-19	7.97e-18
CIAPIN1	1650.08	1.28165	0.202115	6.3412	2.28e-10	3.62e-09
HAX1	1628.75	1.28089	0.177731	7.20692	5.72e-13	1.44e-11
ARHGAP27	413.564	1.28017	0.203826	6.28068	3.37e-10	5.13e-09
NECAB3	127.797	1.27885	0.258432	4.9485	7.48e-07	5.88e-06
ATRIP	109.071	1.27767	0.314953	4.05671	4.98e-05	0.000258507
SORL1	33.7081	1.27741	0.4949	2.58114	0.00984751	0.0276145
ICT1	1325.95	1.27706	0.182481	6.9983	2.59e-12	5.84e-11
PITPNM3	41.171	1.27641	0.393108	3.24696	0.00116645	0.00429008
DHX30	1577.78	1.27545	0.199334	6.39857	1.57e-10	2.56e-09
LPCAT3	290.732	1.27398	0.214405	5.94192	2.82e-09	3.59e-08
PHLDB1	587.232	1.27386	0.188127	6.77128	1.28e-11	2.6e-10
TMEM55B	609.734	1.2732	0.217743	5.84728	5e-09	6.12e-08
PLEKHA7	105.903	1.27319	0.357733	3.55905	0.000372193	0.00155754
STARD3	323.7	1.27287	0.24696	5.15416	2.55e-07	2.2e-06
MED22	219.839	1.27119	0.211947	5.99766	2e-09	2.63e-08
ZBTB7B	45.0293	1.27039	0.394372	3.2213	0.00127611	0.00464986
PRKAB1	489.405	1.2702	0.238898	5.31691	1.06e-07	9.87e-07
ATF3	78.8566	1.2698	0.315233	4.02814	5.62e-05	0.000287546
GLIS2	142.815	1.26836	0.233679	5.42781	5.71e-08	5.58e-07
CALHM2	384.251	1.2674	0.253331	5.00296	5.65e-07	4.53e-06
APOPT1	2175.47	1.26619	0.137975	9.17697	4.43e-20	3.33e-18
ARHGAP40	46.9661	1.26617	0.369188	3.4296	0.000604469	0.00241173
QRICH2	20.2729	1.26484	0.470154	2.69026	0.00713956	0.0208159
CNGA1	24.9173	1.2647	0.520219	2.4311	0.0150533	0.0397111
CDKN1C	736.741	1.26354	0.171765	7.35619	1.89e-13	5.18e-12
PMM2	357.977	1.26232	0.190037	6.64247	3.08e-11	5.84e-10
RRP8	524.047	1.26042	0.23365	5.39448	6.87e-08	6.62e-07
MPDU1	700.464	1.26024	0.208688	6.03884	1.55e-09	2.09e-08
RXRB	445.78	1.25955	0.181642	6.93426	4.08e-12	8.95e-11
LRRK1	104.305	1.259	0.277208	4.54171	5.58e-06	3.61e-05
PSRC1	1067.5	1.25709	0.169838	7.40173	1.34e-13	3.77e-12
TNFRSF25	27.0136	1.25598	0.456434	2.75173	0.00592813	0.0177347
COQ9	773.409	1.25575	0.183203	6.85445	7.16e-12	1.51e-10
FADS3	144.267	1.25515	0.319564	3.9277	8.58e-05	0.000419002
CINP	725.357	1.25426	0.160539	7.8128	5.59e-15	1.93e-13
HDAC11	98.0166	1.25352	0.360821	3.47409	0.000512589	0.0020784
ARID5B	549.878	1.25282	0.194124	6.45372	1.09e-10	1.83e-09
MGC57346	55.3044	1.25259	0.43082	2.90745	0.00364393	0.0116416
AP2S1	3007.7	1.25211	0.143275	8.73917	2.35e-18	1.41e-16
ATXN7L3	394.279	1.2521	0.204855	6.11213	9.83e-10	1.37e-08
ABCB9	353.274	1.25102	0.241126	5.18826	2.12e-07	1.87e-06
CIB1	2454.85	1.25079	0.135362	9.24036	2.46e-20	1.94e-18
PPP1CA	2249.56	1.24971	0.403157	3.09981	0.00193643	0.00670009
CCDC127	999.097	1.24955	0.170516	7.32805	2.34e-13	6.33e-12
FYB	25.154	1.24878	0.527698	2.36647	0.0179585	0.0460695
TROAP	826.167	1.24847	0.158129	7.89523	2.9e-15	1.07e-13
PPP1R14B	7768.38	1.24683	0.118267	10.5425	5.5e-26	8.31e-24
SNAP47	326.991	1.24612	0.190429	6.54374	6e-11	1.07e-09
TXLNA	1329.35	1.24609	0.177749	7.0104	2.38e-12	5.42e-11
TP73	36.7129	1.24548	0.412618	3.01848	0.00254045	0.00849811
HIP1	47.9887	1.24535	0.399995	3.11341	0.00184937	0.00643859
STOML2	3417.83	1.24362	0.179095	6.94392	3.81e-12	8.4e-11
SLC45A4	29.1579	1.24317	0.462672	2.68695	0.00721088	0.0210121
MYL12A	19062.8	1.24292	0.192541	6.45533	1.08e-10	1.82e-09
TMC8	24.7547	1.24242	0.461729	2.6908	0.0071281	0.0207902
PRCC	758.367	1.24071	0.178734	6.94168	3.87e-12	8.53e-11
SRD5A3	624.751	1.2406	0.255465	4.85625	1.2e-06	8.99e-06
EVA1A	503.465	1.24033	0.162214	7.64626	2.07e-14	6.57e-13
FBXO31	178.672	1.24006	0.246869	5.02314	5.08e-07	4.13e-06
ATP5SL	897.771	1.23874	0.207903	5.95826	2.55e-09	3.3e-08
GET4	727.335	1.23849	0.233444	5.3053	1.12e-07	1.05e-06
AGPAT2	464.683	1.23556	0.301545	4.09743	4.18e-05	0.000221601
GAK	263.375	1.23353	0.21743	5.67323	1.4e-08	1.56e-07
SSR2	4976.68	1.23122	0.138211	8.90824	5.18e-19	3.34e-17
FAM73B	182.827	1.23053	0.259815	4.73617	2.18e-06	1.54e-05
RNH1	1141.77	1.2305	0.18636	6.6028	4.03e-11	7.4e-10
PITPNA-AS1	90.9349	1.2303	0.290464	4.23563	2.28e-05	0.000129559
NOL3	207.991	1.229	0.339825	3.61658	0.000298521	0.00127525
CHST3	542.726	1.22891	0.203665	6.03395	1.6e-09	2.15e-08
CSNK1G2	230.236	1.22888	0.256696	4.78728	1.69e-06	1.23e-05
MORC4	1465.34	1.22886	0.156659	7.84418	4.36e-15	1.55e-13
SLC4A2	904.306	1.2282	0.168679	7.28131	3.31e-13	8.72e-12
BNIP1	748.627	1.22661	0.251622	4.87484	1.09e-06	8.26e-06
DESI1	341.921	1.22599	0.193409	6.33887	2.31e-10	3.66e-09
PKHD1	21.7846	1.22566	0.510246	2.4021	0.0163014	0.0424685
SMYD5	383.957	1.22565	0.229734	5.33508	9.55e-08	8.99e-07
RPS6KA1	192.855	1.22414	0.281442	4.34953	1.36e-05	8.11e-05
ZNF518B	83.3715	1.22355	0.439062	2.78674	0.00532412	0.0161648
SPOCD1	27.6693	1.22271	0.47305	2.58475	0.00974502	0.027376
ST6GALNAC4	131.423	1.22146	0.309869	3.94186	8.09e-05	0.000397227
POLR2G	4246.05	1.22099	0.148137	8.2423	1.69e-16	7.68e-15
EYA4	135.313	1.2189	0.405147	3.00852	0.00262522	0.00874256
YRDC	1462	1.21844	0.17608	6.91982	4.52e-12	9.81e-11
WNT3	77.9214	1.21652	0.370713	3.28158	0.00103227	0.00386353
STAG3L5P-PVRIG2P-PILRB	21.0924	1.21633	0.47565	2.5572	0.0105517	0.0293016
NDUFA9	2553	1.21372	0.236048	5.14184	2.72e-07	2.34e-06
PACS2	251.458	1.21321	0.262968	4.61351	3.96e-06	2.66e-05
PKD1	255.041	1.21288	0.210718	5.75592	8.62e-09	1.01e-07
AGTRAP	538.579	1.21275	0.281779	4.30392	1.68e-05	9.8e-05
ZBED3	311.789	1.2116	0.289232	4.18902	2.8e-05	0.000155381
ST6GALNAC6	343.585	1.21159	0.234924	5.15737	2.5e-07	2.17e-06
DNAJC22	43.5991	1.21149	0.408501	2.96569	0.00302006	0.00990218
CBR3	320.789	1.2112	0.240854	5.0288	4.94e-07	4.02e-06
LOC100288911	55.29	1.21021	0.344551	3.51243	0.000444037	0.00182398
RHEBL1	270.792	1.21012	0.19084	6.34102	2.28e-10	3.62e-09
IFIT2	988.027	1.20973	0.143738	8.41625	3.89e-17	1.97e-15
TEX264	987.224	1.20829	0.204842	5.89868	3.66e-09	4.56e-08
RNF182	291.581	1.20813	0.212728	5.67921	1.35e-08	1.52e-07
TXNDC12	2609.52	1.20808	0.212062	5.69681	1.22e-08	1.39e-07
RPS14	17211.4	1.20748	0.181715	6.64493	3.03e-11	5.75e-10
SPNS1	286.981	1.20736	0.207642	5.81463	6.08e-09	7.32e-08
TMEM18	4545.46	1.20697	0.157948	7.64155	2.15e-14	6.77e-13
DAPK1	54.1881	1.20674	0.399043	3.02409	0.00249383	0.00836887
MTMR14	224.498	1.20611	0.250139	4.82175	1.42e-06	1.05e-05
TMC6	121.168	1.20468	0.304664	3.95414	7.68e-05	0.000379755
TOR3A	621.878	1.2023	0.218785	5.49536	3.9e-08	3.95e-07
TMEM80	196.18	1.20205	0.225467	5.33139	9.75e-08	9.16e-07
COX6A1	26108	1.20113	0.148538	8.08635	6.15e-16	2.51e-14
LMAN2L	238.747	1.20089	0.281043	4.273	1.93e-05	0.000111406
SLC26A11	65.0681	1.19973	0.328731	3.64959	0.000262659	0.00114161
CD96	680.484	1.19904	0.419819	2.8561	0.00428887	0.0133996
SDHAF1	106.223	1.19874	0.320084	3.74508	0.00018034	0.000816335
PCGF1	1997.31	1.19832	0.212005	5.65231	1.58e-08	1.75e-07
MSRB1	257.969	1.19831	0.286456	4.18322	2.87e-05	0.000158893
ADCY3	124.893	1.19799	0.264043	4.53712	5.7e-06	3.68e-05
EPHB2	407.381	1.1961	0.167372	7.14633	8.91e-13	2.18e-11
MUM1	223.514	1.19538	0.234097	5.10633	3.28e-07	2.78e-06
APOBEC3B	349.013	1.19498	0.315607	3.7863	0.000152908	0.000704338
PPP1R36	27.6224	1.19487	0.464034	2.57497	0.010025	0.0280333
UBE2M	1069	1.19472	0.226369	5.27776	1.31e-07	1.2e-06
ARHGEF17	97.9205	1.19272	0.338739	3.52105	0.000429838	0.00177307
SNAPIN	1194.5	1.19058	0.273816	4.3481	1.37e-05	8.16e-05
JTB	2607.65	1.18982	0.166645	7.13986	9.34e-13	2.28e-11
PLEKHB1	168.575	1.18913	0.376406	3.15915	0.00158228	0.00563481
TBRG4	732.038	1.18899	0.199416	5.96233	2.49e-09	3.23e-08
RNASEL	64.4609	1.18699	0.378921	3.13256	0.00173291	0.0060958
PSMB8	2116.96	1.18574	0.150369	7.88554	3.13e-15	1.15e-13
ATG4B	436.887	1.18515	0.183649	6.45337	1.09e-10	1.83e-09
HN1	6927.97	1.18479	0.118534	9.99534	1.6e-23	1.81e-21
ARL4D	322.321	1.1843	0.215007	5.50817	3.63e-08	3.7e-07
PPM1F	972.201	1.18413	0.197259	6.00292	1.94e-09	2.55e-08
BAP1	1036.88	1.18403	0.15994	7.40298	1.33e-13	3.74e-12
MCM7	2854.96	1.1835	0.206547	5.72994	1e-08	1.16e-07
SPRY1	2508.91	1.18321	0.182266	6.49167	8.49e-11	1.46e-09
ERF	183.613	1.18283	0.253615	4.66388	3.1e-06	2.13e-05
RAB32	2037.25	1.18185	0.149077	7.92779	2.23e-15	8.43e-14
ULK3	177.169	1.18091	0.290776	4.06125	4.88e-05	0.000254116
BAIAP2	465.628	1.17912	0.183996	6.4084	1.47e-10	2.41e-09
CBX8	69.3936	1.17906	0.323896	3.64025	0.000272377	0.0011783
RBM42	866.126	1.17877	0.224085	5.26035	1.44e-07	1.31e-06
TMCO4	96.3152	1.17737	0.287721	4.09207	4.28e-05	0.000226024
MGAT4B	1203.73	1.17736	0.162128	7.26192	3.82e-13	9.94e-12
CLIC6	65.4767	1.17631	0.344182	3.41771	0.000631512	0.00250437
SERTAD3	689.988	1.17618	0.169866	6.9242	4.38e-12	9.54e-11
SPEF2	41.1564	1.17581	0.4786	2.45678	0.014019	0.0373018
SPSB3	376.142	1.1754	0.207046	5.67698	1.37e-08	1.54e-07
PELO	1051.67	1.17536	0.201181	5.84233	5.15e-09	6.28e-08
DHCR7	307.049	1.17482	0.191012	6.15051	7.72e-10	1.1e-08
PPIE	1460.76	1.1745	0.1732	6.78118	1.19e-11	2.44e-10
HEBP2	2319.17	1.17407	0.179026	6.55808	5.45e-11	9.8e-10
SLC12A8	28.4289	1.17233	0.463916	2.52703	0.0115031	0.0315202
ITGB1BP1	5549.22	1.17163	0.149694	7.82685	5e-15	1.75e-13
BIRC5	3182.22	1.17097	0.176219	6.64498	3.03e-11	5.75e-10
VPS18	250.844	1.17067	0.284073	4.12102	3.77e-05	0.000202413
FAM86DP	79.2063	1.17065	0.357774	3.27205	0.00106771	0.00397665
TMEM104	182.707	1.17058	0.249036	4.70043	2.6e-06	1.81e-05
AADACP1	28.3679	1.17025	0.486207	2.40691	0.0160883	0.0420249
ZNF282	390.072	1.16999	0.177191	6.60297	4.03e-11	7.4e-10
RGCC	3806.23	1.16936	0.242538	4.82135	1.43e-06	1.05e-05
RNF207	77.715	1.16879	0.301145	3.88116	0.000103959	0.000498392
PSMD13	3199.52	1.16858	0.171542	6.8122	9.61e-12	2e-10
DOK4	29.8741	1.16696	0.479306	2.43469	0.0149044	0.0393774
SLC25A10	149.827	1.16665	0.332075	3.51323	0.000442697	0.00181942
C9orf37	258.728	1.16593	0.236774	4.92424	8.47e-07	6.59e-06
PTPRF	692.328	1.16559	0.194098	6.00515	1.91e-09	2.53e-08
NAGK	824.448	1.16432	0.226653	5.13702	2.79e-07	2.4e-06
C10orf35	93.8658	1.16352	0.398552	2.91937	0.00350735	0.0112705
AIMP2	413.53	1.16229	0.207551	5.60005	2.14e-08	2.3e-07
RPP38	751.212	1.16137	0.179703	6.46274	1.03e-10	1.74e-09
DTX2	270.916	1.16113	0.209771	5.53525	3.11e-08	3.21e-07
CELSR2	55.8744	1.16107	0.371415	3.12606	0.00177165	0.00620555
MTG1	1169.77	1.16017	0.17078	6.79337	1.1e-11	2.26e-10
TMEM11	2068.85	1.16001	0.256772	4.51767	6.25e-06	4e-05
LINC00176	22.2254	1.15998	0.493641	2.34984	0.0187817	0.0477814
IFT27	67.6815	1.15845	0.320333	3.6164	0.000298723	0.00127577
HECW1	20.1484	1.15801	0.495781	2.33572	0.0195056	0.0493276
DAGLB	310.376	1.1573	0.184622	6.26846	3.65e-10	5.52e-09
RFT1	353.1	1.15729	0.230001	5.03167	4.86e-07	3.97e-06
BOK	269.706	1.15664	0.228932	5.05231	4.37e-07	3.59e-06
TTC9C	807.438	1.15663	0.197938	5.84343	5.11e-09	6.25e-08
ADC	92.2463	1.15655	0.355131	3.25669	0.0011272	0.00416622
RER1	1518.79	1.15535	0.198867	5.80963	6.26e-09	7.52e-08
SOX2	98.1177	1.1549	0.299531	3.85569	0.000115403	0.000547303
IRF2BP1	68.4968	1.15291	0.370271	3.1137	0.00184756	0.00643371
POMGNT1	463.233	1.15252	0.226856	5.08042	3.77e-07	3.14e-06
KLRC3	34.9597	1.15235	0.405741	2.8401	0.00450987	0.0139955
C6orf1	2722.96	1.15178	0.192761	5.97519	2.3e-09	2.99e-08
SUV39H1	341.307	1.15176	0.248322	4.63817	3.52e-06	2.39e-05
PET112	160.487	1.1499	0.264074	4.35447	1.33e-05	7.95e-05
PSMB1	15999.6	1.14939	0.134825	8.52502	1.53e-17	8.19e-16
STAC	371.783	1.14896	0.275864	4.16495	3.11e-05	0.000170191
SPINT2	4625.77	1.14894	0.177618	6.4686	9.89e-11	1.68e-09
ACSS1	45.8165	1.14854	0.432982	2.65264	0.00798651	0.0230288
TMUB2	888.118	1.14814	0.241849	4.74734	2.06e-06	1.47e-05
IRS1	714.079	1.14745	0.149431	7.67882	1.61e-14	5.19e-13
C1orf85	384.012	1.14721	0.226323	5.06889	4e-07	3.32e-06
UNC119	202.036	1.14684	0.230939	4.96598	6.84e-07	5.41e-06
MRPL22	2845.59	1.14666	0.167527	6.84464	7.67e-12	1.61e-10
C7orf26	193.598	1.14626	0.262634	4.36446	1.27e-05	7.62e-05
ISG20	527.423	1.14582	0.181584	6.3101	2.79e-10	4.34e-09
DYSF	50.9167	1.14566	0.406584	2.81777	0.00483579	0.014861
LRRC20	139.076	1.1441	0.338395	3.38097	0.000722311	0.00281752
LRRC8A	4229.96	1.14398	0.140287	8.15458	3.5e-16	1.49e-14
ANKRD39	343.166	1.14396	0.186967	6.1185	9.45e-10	1.32e-08
VASN	74.6961	1.14216	0.314068	3.63665	0.000276207	0.00119192
ACTA2	112.037	1.14086	0.308626	3.69656	0.000218538	0.000966686
CEP170B	83.9046	1.14084	0.291856	3.90892	9.27e-05	0.000449594
INPP5E	411.504	1.14068	0.198047	5.75967	8.43e-09	9.87e-08
LOC100862671	611.116	1.13944	0.184635	6.17129	6.77e-10	9.72e-09
UBE2J2	782.469	1.13886	0.174461	6.52789	6.67e-11	1.18e-09
CPT1C	53.1822	1.13843	0.34748	3.27626	0.00105192	0.00392676
TWF2	828.616	1.13676	0.238466	4.76697	1.87e-06	1.35e-05
AMT	82.3239	1.13666	0.404098	2.81282	0.00491089	0.0150703
ZDHHC18	180.568	1.13539	0.255536	4.44318	8.86e-06	5.47e-05
PSTPIP2	91.917	1.13486	0.318052	3.56817	0.000359477	0.00151059
C20orf27	810.87	1.13473	0.20091	5.64794	1.62e-08	1.79e-07
MAST2	297.963	1.13281	0.227998	4.96852	6.75e-07	5.35e-06
SNAPC4	205.273	1.13267	0.247464	4.57712	4.71e-06	3.11e-05
FKRP	283.999	1.13259	0.179409	6.3129	2.74e-10	4.27e-09
WDR81	271.616	1.13239	0.208136	5.44064	5.31e-08	5.22e-07
LINC00926	43.9891	1.13233	0.391888	2.88942	0.00385956	0.0122225
FST	3884.73	1.13195	0.14681	7.71031	1.26e-14	4.13e-13
MRPS12	1847.75	1.1316	0.140383	8.06081	7.58e-16	3.05e-14
NPC2	1851.95	1.1315	0.165303	6.84498	7.65e-12	1.61e-10
KLHDC8B	160.958	1.12952	0.290837	3.88371	0.000102876	0.000494159
PDRG1	1287.38	1.12912	0.16563	6.81711	9.29e-12	1.93e-10
PAK4	137.224	1.12908	0.242534	4.65534	3.23e-06	2.21e-05
PANK4	275.155	1.12897	0.215894	5.22928	1.7e-07	1.53e-06
ZBED6CL	33.1476	1.12858	0.476648	2.36774	0.0178972	0.0459479
CAPZB	2549.52	1.12824	0.163892	6.88406	5.82e-12	1.25e-10
TOX2	243.121	1.12788	0.257137	4.38631	1.15e-05	6.95e-05
C1orf50	376.823	1.12697	0.200347	5.62511	1.85e-08	2.01e-07
SCAP	606.49	1.12682	0.243921	4.61961	3.84e-06	2.58e-05
GAL3ST4	27.8174	1.12605	0.424665	2.65161	0.00801098	0.0230867
CLN6	296.21	1.12604	0.177488	6.34432	2.23e-10	3.55e-09
SFT2D2	211.139	1.1248	0.23228	4.84244	1.28e-06	9.57e-06
MRPL57	3890.09	1.12409	0.159529	7.04635	1.84e-12	4.28e-11
FAM134B	39.8677	1.12397	0.456669	2.46124	0.0138459	0.0368974
VARS	514.753	1.12376	0.211096	5.32346	1.02e-07	9.55e-07
ZHX2	108.759	1.12362	0.335223	3.35185	0.000802737	0.0030936
MEPCE	481.605	1.12333	0.196821	5.70738	1.15e-08	1.31e-07
CLUHP3	54.6056	1.12331	0.344827	3.25761	0.00112355	0.00415858
CSK	377.519	1.12158	0.16763	6.69079	2.22e-11	4.28e-10
DHRS13	119.709	1.12002	0.342008	3.27484	0.00105721	0.0039437
TNRC6C-AS1	107.679	1.11958	0.320587	3.49227	0.000478925	0.00195604
C9orf114	293.907	1.11926	0.234674	4.76941	1.85e-06	1.33e-05
ZNF747	44.8158	1.11909	0.410816	2.72406	0.0064484	0.0190434
RAB40C	193.902	1.11889	0.250089	4.47398	7.68e-06	4.8e-05
KHDC1	222.029	1.11842	0.227623	4.91348	8.95e-07	6.93e-06
SMIM12	1945.45	1.11815	0.174412	6.41099	1.45e-10	2.37e-09
SNRPA	720.891	1.11805	0.290475	3.84903	0.000118585	0.000560702
GBAP1	138.135	1.11418	0.287208	3.87934	0.00010474	0.000501882
MRPL21	3278.71	1.11289	0.156991	7.08886	1.35e-12	3.2e-11
CCNB2	2313.27	1.11142	0.188347	5.90088	3.62e-09	4.51e-08
GALNT18	22.1225	1.11095	0.455676	2.43802	0.014768	0.0390631
SF3B5	2593.19	1.11079	0.158121	7.0249	2.14e-12	4.94e-11
CENPP	125.988	1.1105	0.389003	2.85474	0.00430726	0.0134491
NEK6	477.33	1.11004	0.190538	5.82581	5.68e-09	6.88e-08
SPA17	320.687	1.10984	0.224607	4.94127	7.76e-07	6.08e-06
C14orf142	707.856	1.10808	0.15295	7.24474	4.33e-13	1.11e-11
SRC	169.826	1.10626	0.275305	4.0183	5.86e-05	0.000298451
CCNA1	157.211	1.10593	0.392856	2.8151	0.00487627	0.0149699
ZNF662	50.7911	1.10592	0.378962	2.9183	0.00351951	0.0113016
ANXA2P2	347.173	1.105	0.343226	3.21946	0.00128432	0.00467544
TMEM138	1901.12	1.10495	0.19326	5.71744	1.08e-08	1.24e-07
COX8A	5313.21	1.10464	0.178688	6.18196	6.33e-10	9.16e-09
RGS19	362.329	1.1038	0.293739	3.75776	0.000171441	0.000779422
C14orf79	40.3316	1.10206	0.426154	2.58606	0.00970798	0.0272817
CACFD1	239.756	1.10102	0.218054	5.04929	4.43e-07	3.65e-06
CDK2AP1	3529.98	1.09976	0.257896	4.26438	2e-05	0.000115203
ABT1	2212.35	1.09959	0.210129	5.23293	1.67e-07	1.5e-06
OSER1-AS1	215.185	1.09956	0.242864	4.52747	5.97e-06	3.83e-05
MTX1	541.972	1.09846	0.427156	2.57157	0.0101239	0.0282785
RRAD	679.227	1.09813	0.230392	4.76638	1.88e-06	1.35e-05
WDR61	696.521	1.09796	0.148605	7.38847	1.49e-13	4.15e-12
EFEMP1	373.469	1.09753	0.255307	4.29886	1.72e-05	0.000100125
ZNF764	93.3282	1.09547	0.321046	3.41221	0.000644385	0.00255091
ALG12	106.026	1.09533	0.351496	3.11618	0.00183208	0.00638969
SLIRP	5766.51	1.09523	0.22806	4.80237	1.57e-06	1.14e-05
PCBP4	155.949	1.09518	0.254216	4.30807	1.65e-05	9.63e-05
ARFIP2	652.09	1.0944	0.241023	4.54064	5.61e-06	3.63e-05
ANKRD20A5P	84.606	1.09327	0.282142	3.87489	0.000106671	0.000510202
SLC35F3	233.169	1.09285	0.216382	5.05058	4.4e-07	3.62e-06
C7orf61	29.1164	1.09284	0.459544	2.3781	0.017402	0.0448597
HPS6	335.542	1.09246	0.204463	5.34308	9.14e-08	8.62e-07
TBC1D10A	209.217	1.0924	0.231946	4.70971	2.48e-06	1.73e-05
PPCS	3557.67	1.09049	0.236621	4.6086	4.05e-06	2.72e-05
PNKD	1581.69	1.08893	0.167733	6.49201	8.47e-11	1.46e-09
CAMKK2	561.757	1.08873	0.199674	5.45253	4.97e-08	4.92e-07
EPHX1	63.5981	1.08735	0.38372	2.83372	0.00460099	0.0142445
ATP5B	9982.83	1.08689	0.198584	5.47319	4.42e-08	4.43e-07
PER1	176.191	1.08643	0.26959	4.02991	5.58e-05	0.000285751
PPCDC	270.986	1.08503	0.262952	4.12633	3.69e-05	0.00019827
GEMIN4	358.577	1.08456	0.217939	4.97645	6.48e-07	5.16e-06
ABHD17A	143.86	1.08406	0.358935	3.02022	0.00252592	0.00846029
C17orf103	39.6003	1.08396	0.405104	2.67575	0.00745629	0.0216429
KCTD1	169.553	1.08211	0.238173	4.54337	5.54e-06	3.59e-05
AGR2	213.563	1.08202	0.227281	4.76069	1.93e-06	1.38e-05
DYNC1H1	3564.44	1.08162	0.127767	8.46555	2.55e-17	1.33e-15
POC1A	335.411	1.08095	0.319135	3.38714	0.000706259	0.00276475
AVPI1	154.814	1.0803	0.25026	4.31672	1.58e-05	9.28e-05
PHLDA2	10880.7	1.08027	0.165339	6.53366	6.42e-11	1.14e-09
THRA	36.1537	1.08011	0.426904	2.5301	0.011403	0.0312786
ZNF699	98.1679	1.07978	0.306761	3.51995	0.00043162	0.00177902
MRPL34	3907.68	1.07948	0.179453	6.01539	1.79e-09	2.39e-08
ANXA3	2862.44	1.07873	0.206899	5.2138	1.85e-07	1.65e-06
TSPAN31	187.707	1.07866	0.351883	3.06538	0.00217393	0.00741089
ADCY9	77.6546	1.0784	0.317971	3.39152	0.00069507	0.00272683
ETNK2	59.3916	1.07817	0.384802	2.80187	0.00508066	0.0155216
E2F1	360.705	1.07738	0.28107	3.83315	0.000126513	0.000593363
PLEKHM2	205.308	1.0772	0.212387	5.07189	3.94e-07	3.27e-06
RELT	192.672	1.07587	0.210574	5.10921	3.24e-07	2.74e-06
SP5	36.9975	1.07531	0.403091	2.66766	0.00763813	0.0221136
HINT1	12877.9	1.07527	0.146482	7.34064	2.13e-13	5.8e-12
ITPA	1348.44	1.07508	0.153036	7.025	2.14e-12	4.94e-11
MYEOV2	3371.64	1.07456	0.386128	2.78291	0.00538737	0.0163378
DHRS7B	1001.47	1.07156	0.209487	5.11517	3.13e-07	2.67e-06
EMP3	31226	1.07118	0.130558	8.2046	2.31e-16	1.03e-14
TK1	2205.68	1.07102	0.191483	5.59329	2.23e-08	2.38e-07
NPLOC4	1444.1	1.07084	0.15548	6.88731	5.69e-12	1.22e-10
CUEDC1	152.617	1.07028	0.255907	4.18231	2.89e-05	0.000159416
RPA2	4577.63	1.06971	0.204727	5.22504	1.74e-07	1.56e-06
THOC6	176.391	1.06896	0.319867	3.34189	0.000832086	0.00319495
CABIN1	169.344	1.06877	0.253552	4.2152	2.5e-05	0.000140387
SCAMP3	3330.96	1.06873	0.212796	5.02235	5.1e-07	4.14e-06
CDIP1	73.8698	1.0685	0.320146	3.33753	0.000845271	0.00323451
MUTYH	290.233	1.06792	0.192261	5.55453	2.78e-08	2.9e-07
KLF2	818.391	1.06727	0.185972	5.73889	9.53e-09	1.11e-07
TATDN3	102.324	1.06694	0.376689	2.83243	0.00461962	0.0142881
EIF6	8763.62	1.0662	0.161173	6.61525	3.71e-11	6.87e-10
PFDN1	4771.38	1.06542	0.228463	4.66344	3.11e-06	2.13e-05
FBXL7	54.9458	1.06517	0.348909	3.05287	0.00226666	0.00768862
OAS1	66.7979	1.06513	0.430807	2.47241	0.0134207	0.0359595
SNHG17	913.098	1.06506	0.162433	6.55693	5.49e-11	9.86e-10
CMTM7	7587.61	1.06499	0.184306	5.77836	7.54e-09	8.96e-08
STK11IP	412.009	1.06493	0.241696	4.40608	1.05e-05	6.4e-05
LOC283070	154.917	1.06405	0.239374	4.44514	8.78e-06	5.42e-05
DTX2P1-UPK3BP1-PMS2P11	46.6166	1.0636	0.365969	2.90625	0.00365793	0.0116745
MYH10	100.672	1.06357	0.28265	3.76286	0.000167982	0.000765912
DUSP14	1860.47	1.06267	0.19696	5.39535	6.84e-08	6.6e-07
TARBP2	818.191	1.06061	0.192053	5.52249	3.34e-08	3.44e-07
LZTS2	520.993	1.0591	0.166844	6.34785	2.18e-10	3.48e-09
POLE	257.223	1.05887	0.266319	3.97597	7.01e-05	0.000350402
ARHGEF1	460.182	1.05819	0.195098	5.42392	5.83e-08	5.7e-07
LINC00601	37.686	1.05724	0.373661	2.82941	0.00466335	0.0144017
NTPCR	953.279	1.05718	0.178067	5.93698	2.9e-09	3.69e-08
PEPD	511.762	1.05694	0.26544	3.98183	6.84e-05	0.000342852
SLIT1	23.6547	1.05647	0.452976	2.33227	0.0196862	0.0496724
CTIF	66.0058	1.05628	0.361422	2.92258	0.00347149	0.0111816
FAM95C	42.3241	1.05622	0.402962	2.62114	0.00876371	0.0249584
MRPL43	2186.53	1.05519	0.167348	6.3054	2.87e-10	4.47e-09
NAB2	142.97	1.05507	0.216594	4.8712	1.11e-06	8.39e-06
NDUFA4	9771.52	1.05489	0.16683	6.32316	2.56e-10	4.03e-09
TNFAIP8L1	183.443	1.05442	0.303127	3.47847	0.00050429	0.00204898
CH25H	57.9609	1.05437	0.354069	2.97786	0.00290273	0.00954933
FITM2	267.368	1.0542	0.221004	4.77006	1.84e-06	1.33e-05
L3MBTL2	299.235	1.0537	0.193382	5.44883	5.07e-08	5.01e-07
CDH24	64.5786	1.05288	0.302869	3.47634	0.000508299	0.00206314
SLC43A1	141.563	1.05181	0.3013	3.49091	0.00048138	0.00196526
TSSC1	610.801	1.05141	0.172608	6.09132	1.12e-09	1.54e-08
C19orf40	208.943	1.0514	0.255912	4.10845	3.98e-05	0.000212297
GPR135	51.4568	1.05114	0.38902	2.70202	0.00689187	0.0201686
SHISA3	95.8691	1.05109	0.347139	3.02788	0.00246278	0.00826998
MFSD2A	118.543	1.04917	0.355521	2.95108	0.00316663	0.0103096
UBN1	1224.48	1.04839	0.199572	5.25317	1.5e-07	1.36e-06
NINL	155.31	1.04739	0.317249	3.30148	0.000961745	0.00363506
ATIC	1321.56	1.04725	0.171561	6.10421	1.03e-09	1.43e-08
FBXW4P1	47.8953	1.04682	0.444473	2.35518	0.0185135	0.0472291
BANF1	11989.3	1.0462	0.141758	7.38016	1.58e-13	4.4e-12
RPS16	6572.29	1.04551	0.181156	5.77131	7.87e-09	9.29e-08
CEP89	342.029	1.04441	0.186167	5.61006	2.02e-08	2.18e-07
ANKRD9	125.545	1.04399	0.368485	2.83321	0.00460829	0.0142588
CDK4	3012.23	1.04286	0.155857	6.69114	2.21e-11	4.28e-10
DGCR2	289.112	1.04263	0.215981	4.8274	1.38e-06	1.02e-05
SPEG	83.8599	1.0424	0.357007	2.91983	0.00350227	0.0112669
PHF19	1215.59	1.0417	0.154276	6.75222	1.46e-11	2.94e-10
SLC39A1	1465.04	1.04151	0.222508	4.68079	2.86e-06	1.98e-05
RPL24	5896.86	1.03943	0.22054	4.71311	2.44e-06	1.71e-05
TRIM16L	97.7859	1.0392	0.34832	2.98346	0.00285007	0.00938986
DNAJB5	63.3826	1.03873	0.331511	3.13332	0.0017284	0.00608346
TTLL1	41.8282	1.03837	0.424072	2.44858	0.0143422	0.0380586
R3HCC1	517.038	1.03823	0.247765	4.1904	2.78e-05	0.000154656
MRPL38	564.827	1.03819	0.226661	4.58037	4.64e-06	3.07e-05
CASP9	106.451	1.03819	0.350742	2.95998	0.00307659	0.0100644
SLC9A8	249.353	1.03808	0.204299	5.08115	3.75e-07	3.13e-06
ERBB2	544.503	1.03775	0.170693	6.07961	1.2e-09	1.66e-08
CHPF2	77.5983	1.03737	0.442307	2.34536	0.0190089	0.0482812
ASF1B	2003.03	1.03714	0.223664	4.63706	3.53e-06	2.4e-05
RXRA	434.952	1.03708	0.250026	4.1479	3.36e-05	0.000182233
SLC35E2B	367.34	1.0369	0.194456	5.33232	9.7e-08	9.12e-07
TRIM11	339.868	1.03664	0.193499	5.35737	8.44e-08	8e-07
P4HTM	204.466	1.03656	0.333421	3.10887	0.00187807	0.00653271
MED19	920.288	1.03497	0.157324	6.57859	4.75e-11	8.67e-10
FANCG	983.102	1.0344	0.167401	6.17918	6.44e-10	9.31e-09
ZBTB47	130.739	1.03417	0.251177	4.11731	3.83e-05	0.000205136
CKB	844.779	1.03383	0.18599	5.55854	2.72e-08	2.85e-07
SORBS2	563.678	1.03367	0.173686	5.95137	2.66e-09	3.41e-08
METTL17	578.236	1.03281	0.226189	4.56612	4.97e-06	3.26e-05
HOXB9	95.1137	1.03246	0.27066	3.81459	0.000136407	0.000635029
ENDOV	417.206	1.03242	0.192739	5.35659	8.48e-08	8.03e-07
PYROXD2	178.827	1.0324	0.273018	3.78144	0.000155923	0.000716546
DNAJA3	2066.52	1.03233	0.134258	7.6891	1.48e-14	4.83e-13
NEDD9	831.395	1.03143	0.1454	7.09374	1.31e-12	3.1e-11
NIPSNAP3B	25.4207	1.0311	0.433322	2.37953	0.0173348	0.0447013
S1PR2	52.5134	1.02803	0.338858	3.0338	0.00241495	0.00812672
KCNJ14	166.302	1.02778	0.22776	4.51255	6.41e-06	4.09e-05
CASP6	947.678	1.02734	0.172499	5.95561	2.59e-09	3.35e-08
DUSP23	778.363	1.02691	0.172741	5.94479	2.77e-09	3.54e-08
MFF	1947.37	1.02671	0.160308	6.40459	1.51e-10	2.47e-09
HS6ST1	83.0198	1.02565	0.305064	3.36208	0.000773565	0.00299366
MRRF	751.151	1.02527	0.203355	5.04177	4.61e-07	3.78e-06
PIGU	1341.38	1.02423	0.217339	4.7126	2.45e-06	1.71e-05
MAPKAPK3	930.959	1.02378	0.186481	5.48996	4.02e-08	4.06e-07
GAS2L1	646.096	1.02333	0.184597	5.54357	2.96e-08	3.07e-07
MKNK2	722.267	1.02302	0.167749	6.0985	1.07e-09	1.48e-08
ADCY6	179.031	1.02267	0.229139	4.46309	8.08e-06	5.02e-05
RAB15	49.5052	1.02241	0.362047	2.82396	0.00474339	0.0146162
KIAA1211	94.4348	1.02167	0.341432	2.99231	0.00276878	0.00916627
HDLBP	1970.49	1.02144	0.140289	7.28098	3.31e-13	8.72e-12
ZNF35	209.534	1.02075	0.251484	4.05889	4.93e-05	0.000256386
CALB2	296.517	1.02041	0.263867	3.86713	0.000110124	0.000524326
WRAP73	506.322	1.01999	0.168316	6.05997	1.36e-09	1.85e-08
2019-03-01	78.4854	1.01948	0.35203	2.89599	0.00377962	0.0120141
TMEM99	1701.67	1.01901	0.207609	4.90831	9.19e-07	7.1e-06
RHBDF1	363.318	1.01895	0.203051	5.01817	5.22e-07	4.23e-06
UBE2L6	1418.59	1.01844	0.25312	4.02355	5.73e-05	0.000292725
ABCF3	456.838	1.01826	0.226921	4.48728	7.21e-06	4.54e-05
MRPL46	835.436	1.0181	0.206796	4.92319	8.51e-07	6.62e-06
BACE2	455.684	1.01771	0.216736	4.69564	2.66e-06	1.85e-05
SEC61A1	1809.91	1.01763	0.170166	5.98022	2.23e-09	2.9e-08
VPS25	2662.55	1.01706	0.200876	5.06314	4.12e-07	3.41e-06
CDKN2AIPNL	1175.35	1.01701	0.210678	4.82732	1.38e-06	1.02e-05
TMX2	3240.84	1.01548	0.163815	6.19896	5.68e-10	8.3e-09
TPI1	21128	1.01472	0.225606	4.49777	6.87e-06	4.35e-05
TMEM42	920.135	1.01471	0.16769	6.05111	1.44e-09	1.95e-08
FARSB	1525.38	1.01465	0.210947	4.80996	1.51e-06	1.11e-05
C5orf63	328.963	1.01439	0.199192	5.0925	3.53e-07	2.97e-06
CARS2	357.105	1.01432	0.207316	4.89262	9.95e-07	7.63e-06
ZNF71	142.522	1.01418	0.315387	3.21566	0.00130145	0.00472905
PLXNA2	635.374	1.01417	0.167773	6.04488	1.5e-09	2.02e-08
2019-09-09	329.838	1.01412	0.187105	5.42004	5.96e-08	5.8e-07
POLR1C	3158.87	1.01352	0.228479	4.43593	9.17e-06	5.64e-05
ECHDC2	322.368	1.01272	0.194567	5.20499	1.94e-07	1.72e-06
OGG1	165.669	1.01212	0.264717	3.8234	0.000131622	0.000615123
CCAR2	365.116	1.01207	0.230005	4.4002	1.08e-05	6.55e-05
USP19	421.323	1.01203	0.207265	4.8828	1.05e-06	7.97e-06
VAMP8	9024.04	1.01161	0.156073	6.48165	9.07e-11	1.55e-09
FAM109A	58.8683	1.01139	0.417175	2.42437	0.0153348	0.0403208
DERA	848.893	1.01097	0.179761	5.62399	1.87e-08	2.03e-07
ZNF101	88.5847	1.01051	0.353559	2.8581	0.00426183	0.0133223
ACOX2	330.645	1.00968	0.245939	4.10542	4.04e-05	0.000214804
LOXL1	131.478	1.00909	0.385621	2.61678	0.00887628	0.0252378
C16orf95	72.7396	1.00867	0.311519	3.23791	0.00120409	0.00441202
THAP4	405.981	1.00845	0.245325	4.11066	3.95e-05	0.000210628
ILKAP	626.358	1.00831	0.198171	5.08808	3.62e-07	3.04e-06
SEC24C	819.535	1.0081	0.190988	5.27832	1.3e-07	1.2e-06
STK25	383.539	1.00769	0.193754	5.20086	1.98e-07	1.75e-06
HAGH	428.195	1.00699	0.208246	4.83557	1.33e-06	9.87e-06
ELOVL1	2455.5	1.00682	0.244728	4.11402	3.89e-05	0.000207935
LSS	292.631	1.0065	0.199634	5.04175	4.61e-07	3.78e-06
SAMM50	802.513	1.00533	0.181168	5.54916	2.87e-08	2.98e-07
GALNT5	234.535	1.0053	0.219545	4.57903	4.67e-06	3.08e-05
GINS2	1034.89	1.0053	0.206077	4.87826	1.07e-06	8.13e-06
CYB561A3	156.693	1.00482	0.279166	3.59935	0.000319018	0.00135361
UQCC1	914.724	1.00448	0.15948	6.29849	3.01e-10	4.65e-09
TOMM22	1031.99	1.00438	0.211636	4.74577	2.08e-06	1.48e-05
DDX28	166.399	1.00401	0.275259	3.6475	0.000264808	0.00114999
ZNF783	286.312	1.004	0.230555	4.35472	1.33e-05	7.94e-05
NDUFS3	1761.39	1.00373	0.183322	5.47524	4.37e-08	4.4e-07
MLPH	1242.26	1.0036	0.154125	6.5116	7.44e-11	1.29e-09
SLC14A1	52.3688	1.00285	0.382262	2.62346	0.00870413	0.0248112
RBM4	1565.04	1.0023	0.175281	5.71823	1.08e-08	1.24e-07
CRY2	124.498	1.00193	0.307587	3.25739	0.00112442	0.00415985
HOXD4	52.8057	1.00158	0.406249	2.46544	0.0136846	0.0365233
TTLL12	345.74	1.00139	0.225729	4.43626	9.15e-06	5.63e-05
TMTC3	1590.35	-1.00092	0.144448	-6.92926	4.23e-12	9.23e-11
MEX3D	151.069	-1.0014	0.285482	-3.50774	0.000451933	0.0018535
NEDD4	820.253	-1.00145	0.153485	-6.52476	6.81e-11	1.2e-09
TAF4	409.407	-1.00266	0.240632	-4.16676	3.09e-05	0.000169082
HERC3	176.972	-1.00366	0.245689	-4.0851	4.41e-05	0.000232137
C5orf22	917.2	-1.00392	0.18642	-5.38525	7.23e-08	6.94e-07
ZBTB41	492.951	-1.00421	0.256658	-3.91263	9.13e-05	0.000444109
TAS2R20	59.9899	-1.00648	0.349812	-2.87721	0.00401211	0.0126634
EIF2AK2	1443.28	-1.00714	0.13544	-7.43611	1.04e-13	2.97e-12
DEK	14706.4	-1.00765	0.149881	-6.72303	1.78e-11	3.5e-10
DPH3P1	130.489	-1.00783	0.347157	-2.9031	0.00369486	0.0117732
FZD6	2429.85	-1.00794	0.166003	-6.07181	1.26e-09	1.73e-08
BEX2	69.8804	-1.0084	0.301882	-3.34036	0.000836685	0.00320869
PTPRB	53.7478	-1.0085	0.421024	-2.39534	0.0166048	0.0431089
UBE2B	4723.21	-1.00866	0.136997	-7.36263	1.8e-13	4.94e-12
NCF2	189.568	-1.00878	0.319078	-3.16155	0.00156931	0.00558994
RBBP9	660.868	-1.00927	0.208566	-4.83911	1.3e-06	9.72e-06
NEXN	725.284	-1.01035	0.196738	-5.13552	2.81e-07	2.42e-06
JRKL	426.165	-1.01065	0.21225	-4.7616	1.92e-06	1.38e-05
FBXL19-AS1	49.2247	-1.01071	0.409629	-2.46738	0.0136107	0.0363641
HSPH1	2592.68	-1.01077	0.190161	-5.31536	1.06e-07	9.94e-07
CELF2	1078.72	-1.0123	0.18528	-5.46363	4.66e-08	4.67e-07
SLC7A2	200.765	-1.01233	0.295458	-3.42631	0.000611846	0.00243574
RNF138	1080.93	-1.01306	0.145048	-6.98434	2.86e-12	6.41e-11
RPRD1B	1658.79	-1.01347	0.174641	-5.80318	6.51e-09	7.8e-08
ACBD7	91.9965	-1.0153	0.308706	-3.2889	0.0010058	0.00377884
VBP1	2636.95	-1.0154	0.178487	-5.68892	1.28e-08	1.44e-07
RPL36	2493.16	-1.01546	0.171795	-5.91087	3.4e-09	4.28e-08
NAP1L3	113.698	-1.0155	0.346024	-2.93477	0.00333797	0.0107936
XK	44.7652	-1.01553	0.425917	-2.38434	0.0171098	0.044179
MMS22L	697.492	-1.01556	0.219334	-4.63022	3.65e-06	2.47e-05
C16orf52	532.585	-1.01562	0.163517	-6.21107	5.26e-10	7.73e-09
SURF2	233.698	-1.01595	0.259903	-3.90897	9.27e-05	0.000449594
ZNF804A	296.6	-1.01609	0.249093	-4.07915	4.52e-05	0.00023728
ACER3	465.519	-1.0174	0.17997	-5.65318	1.58e-08	1.74e-07
MAN2B2	88.916	-1.0179	0.426657	-2.38576	0.0170438	0.0440593
API5	2057.73	-1.01824	0.175092	-5.81547	6.05e-09	7.29e-08
KIAA1109	892.065	-1.01893	0.179768	-5.66804	1.44e-08	1.61e-07
PACSIN3	110.664	-1.01946	0.331589	-3.07447	0.0021088	0.0072249
CCDC80	280.729	-1.01965	0.186361	-5.47134	4.47e-08	4.48e-07
DICER1	1690.48	-1.01978	0.142523	-7.15518	8.36e-13	2.07e-11
SKIL	1062.77	-1.01983	0.171904	-5.93254	2.98e-09	3.79e-08
MRS2P2	78.1991	-1.01991	0.35533	-2.87031	0.00410066	0.0129023
TSPYL5	232.811	-1.02011	0.2315	-4.40651	1.05e-05	6.39e-05
GAD1	167.082	-1.02021	0.370905	-2.75058	0.00594892	0.0177935
BTG1	6874.53	-1.02043	0.141593	-7.20677	5.73e-13	1.44e-11
REL	281.964	-1.0207	0.268368	-3.80336	0.000142747	0.00066102
ZNF486	187.502	-1.02165	0.278169	-3.67278	0.000239928	0.0010533
TCF20	329.538	-1.02229	0.211495	-4.83362	1.34e-06	9.96e-06
ZNF326	668.578	-1.02269	0.180379	-5.66968	1.43e-08	1.59e-07
LOC100505736	44.8824	-1.02401	0.371251	-2.75826	0.00581095	0.017424
TMEM185A	186.254	-1.02417	0.270987	-3.77941	0.000157201	0.000721994
WRN	440.488	-1.02477	0.196582	-5.21295	1.86e-07	1.66e-06
ATXN3	1331.13	-1.02495	0.125566	-8.16265	3.28e-16	1.4e-14
PRKG1	82.5511	-1.02552	0.293531	-3.49374	0.000476303	0.00194634
RPL36AL	14334.9	-1.02571	0.221625	-4.62812	3.69e-06	2.49e-05
DDX21	7977.99	-1.02591	0.174641	-5.87437	4.24e-09	5.26e-08
EIF3G	881.254	-1.02643	0.178021	-5.76577	8.13e-09	9.56e-08
PGM2	315.85	-1.02698	0.292132	-3.51545	0.000439003	0.00180613
SGTB	125.752	-1.02703	0.252564	-4.06642	4.77e-05	0.000249034
SSX2IP	796.383	-1.02719	0.208599	-4.9242	8.47e-07	6.59e-06
SLC16A4	194.904	-1.02721	0.258012	-3.98123	6.86e-05	0.000343605
SUZ12P1	283.516	-1.02779	0.217702	-4.72112	2.35e-06	1.65e-05
SERINC1	3721.3	-1.02817	0.153943	-6.67886	2.41e-11	4.64e-10
WDR17	48.8205	-1.02834	0.389955	-2.63707	0.00836252	0.0239635
EEA1	1404.75	-1.02919	0.16884	-6.09565	1.09e-09	1.5e-08
HNRNPH3	2069.5	-1.02957	0.150452	-6.84321	7.74e-12	1.63e-10
HIPK1	1391.19	-1.0298	0.148405	-6.93913	3.95e-12	8.67e-11
ATAD2	3644.33	-1.03045	0.179243	-5.74893	8.98e-09	1.05e-07
DRAP1	1292.48	-1.03077	0.162915	-6.32707	2.5e-10	3.94e-09
ZNF587	468.777	-1.03102	0.205019	-5.02889	4.93e-07	4.02e-06
KPNA3	1897.19	-1.03177	0.17739	-5.81639	6.01e-09	7.25e-08
DNAJC27	153.752	-1.03226	0.276017	-3.73984	0.000184141	0.000832342
ST3GAL6	529.082	-1.03227	0.178858	-5.77146	7.86e-09	9.29e-08
HCFC1	2718.07	-1.03258	0.134712	-7.66508	1.79e-14	5.75e-13
KIF23	3372.2	-1.03275	0.161376	-6.39965	1.56e-10	2.54e-09
TUBE1	269.572	-1.03284	0.232485	-4.44259	8.89e-06	5.48e-05
MTFR1	354.592	-1.03318	0.225229	-4.58725	4.49e-06	2.98e-05
ZNF860	80.5167	-1.03329	0.329211	-3.13869	0.00169703	0.00599052
ZBTB1	713.954	-1.03355	0.173558	-5.95503	2.6e-09	3.35e-08
MAP4K3	1074.29	-1.03361	0.153404	-6.73783	1.61e-11	3.21e-10
UBE2W	1296.31	-1.0342	0.16851	-6.1373	8.39e-10	1.18e-08
NOM1	1240.87	-1.035	0.224862	-4.60281	4.17e-06	2.79e-05
C6orf211	304.938	-1.03508	0.267655	-3.86723	0.000110077	0.000524322
GCLC	509.639	-1.03529	0.195147	-5.30519	1.13e-07	1.05e-06
PHTF2	482.104	-1.03532	0.213092	-4.85857	1.18e-06	8.9e-06
NUP205	1279.92	-1.03562	0.211836	-4.8888	1.01e-06	7.76e-06
SIRT1	502.104	-1.03587	0.183322	-5.65053	1.6e-08	1.76e-07
RBL1	1350.43	-1.03589	0.156341	-6.62583	3.45e-11	6.45e-10
MEA1	2132.38	-1.03593	0.178006	-5.81965	5.9e-09	7.12e-08
LAMTOR4	625.274	-1.03727	0.206101	-5.03281	4.83e-07	3.95e-06
NEXN-AS1	33.452	-1.03748	0.439664	-2.35971	0.0182891	0.0467554
OPA1	1653.56	-1.03812	0.16944	-6.12679	8.97e-10	1.26e-08
LRRC34	135.872	-1.03866	0.215715	-4.81498	1.47e-06	1.08e-05
BTBD7	1666.04	-1.03942	0.169983	-6.11485	9.67e-10	1.35e-08
WNK1	1882.98	-1.03947	0.178268	-5.83092	5.51e-09	6.69e-08
SLC33A1	256.053	-1.04001	0.270741	-3.84134	0.000122366	0.000575805
TTC7B	133.999	-1.04078	0.262449	-3.96565	7.32e-05	0.000364632
OSTF1	211.14	-1.04124	0.246479	-4.22447	2.4e-05	0.000135406
RNF103	601.701	-1.04137	0.207804	-5.0113	5.41e-07	4.35e-06
SIPA1L3	503.199	-1.04153	0.211572	-4.92282	8.53e-07	6.63e-06
RPS12	2786.24	-1.04154	0.373044	-2.79199	0.00523846	0.0159602
SMARCA1	742.246	-1.04159	0.228537	-4.55765	5.17e-06	3.39e-05
DNAJC24	393.201	-1.04256	0.229901	-4.53481	5.77e-06	3.72e-05
ARMCX5	193.874	-1.04326	0.249254	-4.18554	2.84e-05	0.000157505
TMEM209	1428.38	-1.04377	0.1897	-5.50225	3.75e-08	3.81e-07
RBM26	1772.05	-1.04385	0.182944	-5.70585	1.16e-08	1.32e-07
L1CAM	172.055	-1.04396	0.21735	-4.80314	1.56e-06	1.14e-05
L2HGDH	352.224	-1.04401	0.231171	-4.51617	6.3e-06	4.03e-05
ZFHX3	1174.53	-1.04409	0.157338	-6.63599	3.22e-11	6.07e-10
STAM	1250.38	-1.04428	0.180556	-5.78369	7.31e-09	8.72e-08
PCMTD1	494.143	-1.04516	0.223983	-4.66626	3.07e-06	2.11e-05
GOLT1B	2382.65	-1.04558	0.153744	-6.80074	1.04e-11	2.15e-10
KLHL28	838.314	-1.04567	0.166905	-6.26505	3.73e-10	5.63e-09
FAM122C	121.864	-1.04589	0.31329	-3.33842	0.000842569	0.00322653
FAM126B	614.476	-1.046	0.18384	-5.68973	1.27e-08	1.44e-07
PBX3	778.866	-1.04646	0.188032	-5.5653	2.62e-08	2.75e-07
ZNF217	1196.66	-1.04823	0.205815	-5.09306	3.52e-07	2.96e-06
RNF11	2326.68	-1.04836	0.156607	-6.6942	2.17e-11	4.21e-10
AFG3L1P	422.412	-1.04921	0.181363	-5.78513	7.25e-09	8.66e-08
ATP2B1	7749.29	-1.05001	0.149954	-7.00221	2.52e-12	5.71e-11
CC2D1A	128.658	-1.05034	0.231636	-4.53444	5.78e-06	3.73e-05
KRI1	684.662	-1.05116	0.223038	-4.71293	2.44e-06	1.71e-05
TGFBR2	5193.41	-1.05165	0.140824	-7.46784	8.15e-14	2.37e-12
PRSS12	176.729	-1.05178	0.257199	-4.08938	4.33e-05	0.000228436
DNAJB4	351.612	-1.05198	0.205636	-5.11573	3.13e-07	2.66e-06
CDK6	3713.08	-1.0521	0.155855	-6.75054	1.47e-11	2.97e-10
FBXL3	1279.53	-1.05211	0.194379	-5.41265	6.21e-08	6.04e-07
POLD4	299.601	-1.05289	0.18772	-5.60883	2.04e-08	2.19e-07
ING3	842.576	-1.05316	0.185155	-5.68801	1.29e-08	1.45e-07
CBFB	2812.38	-1.05342	0.161413	-6.52627	6.74e-11	1.19e-09
NTHL1	333.806	-1.05413	0.222426	-4.73926	2.15e-06	1.52e-05
2019-09-10	908.82	-1.05423	0.170276	-6.1913	5.97e-10	8.67e-09
IL13RA1	1214.14	-1.0546	0.169855	-6.20883	5.34e-10	7.82e-09
STRIP2	302.261	-1.05476	0.267362	-3.94508	7.98e-05	0.000392732
PAPOLG	665.826	-1.05486	0.169294	-6.2309	4.64e-10	6.91e-09
KBTBD7	169.888	-1.0554	0.250743	-4.20908	2.56e-05	0.000143473
ZNF614	467.955	-1.05578	0.184045	-5.73652	9.66e-09	1.12e-07
CHCHD10	31.4101	-1.05747	0.41335	-2.55829	0.0105188	0.0292309
GPR180	579.736	-1.05779	0.191146	-5.53395	3.13e-08	3.23e-07
FNIP2	355.812	-1.05881	0.212832	-4.97489	6.53e-07	5.2e-06
SNORD17	62.2379	-1.05888	0.364114	-2.90811	0.00363621	0.0116231
SPRED1	1969.76	-1.05931	0.154806	-6.84283	7.76e-12	1.63e-10
MORC3	702.038	-1.05942	0.187901	-5.6382	1.72e-08	1.88e-07
CRY1	741.509	-1.05971	0.177889	-5.95718	2.57e-09	3.32e-08
COX6C	10404.9	-1.06068	0.218954	-4.84429	1.27e-06	9.49e-06
MTMR1	470.072	-1.06082	0.222467	-4.76845	1.86e-06	1.34e-05
CPNE8	1235.32	-1.06178	0.237141	-4.47741	7.56e-06	4.73e-05
PYGO1	172.407	-1.06386	0.236186	-4.50435	6.66e-06	4.23e-05
FBXL13	78.8053	-1.06398	0.392547	-2.71044	0.00671942	0.0197559
HCG11	165.215	-1.06562	0.363967	-2.9278	0.0034137	0.0110113
TIMM8A	947.293	-1.06585	0.164863	-6.46508	1.01e-10	1.72e-09
SCAI	306.755	-1.0659	0.21671	-4.91857	8.72e-07	6.76e-06
MAML2	652.501	-1.06605	0.170245	-6.26189	3.8e-10	5.74e-09
AHR	3552.9	-1.06622	0.172836	-6.16897	6.87e-10	9.84e-09
ARHGAP12	813.808	-1.0665	0.186567	-5.71646	1.09e-08	1.25e-07
ZNF292	1403.18	-1.06672	0.166075	-6.42313	1.33e-10	2.21e-09
CMAS	1476.19	-1.06693	0.173961	-6.13316	8.62e-10	1.21e-08
ZNF451	1502.93	-1.06997	0.169905	-6.29746	3.03e-10	4.67e-09
GSTCD	269.501	-1.06998	0.254729	-4.20048	2.66e-05	0.000148458
DCUN1D1	958.788	-1.07085	0.138024	-7.75845	8.6e-15	2.87e-13
SOS2	927.188	-1.07116	0.199015	-5.38232	7.35e-08	7.04e-07
GRAMD1B	27.3912	-1.07182	0.445005	-2.40856	0.0160154	0.0418622
ATP8B1	352.785	-1.07247	0.211713	-5.06566	4.07e-07	3.37e-06
GFM1	861.858	-1.07295	0.191669	-5.59792	2.17e-08	2.33e-07
CPNE3	3136.1	-1.07323	0.16604	-6.46368	1.02e-10	1.73e-09
FAM24B	432.045	-1.07401	0.196702	-5.46009	4.76e-08	4.75e-07
VPS4B	1674.33	-1.07402	0.181654	-5.91247	3.37e-09	4.24e-08
PHACTR2	1577.65	-1.07514	0.170992	-6.28765	3.22e-10	4.93e-09
UBE3A	4032.54	-1.07593	0.141492	-7.60418	2.87e-14	8.85e-13
IDS	2083.97	-1.07615	0.171702	-6.26755	3.67e-10	5.55e-09
KLHL2	660.978	-1.07817	0.199623	-5.40101	6.63e-08	6.41e-07
CHID1	347.239	-1.07858	0.231053	-4.66809	3.04e-06	2.09e-05
LRRK2	59.6255	-1.07983	0.394349	-2.73826	0.00617647	0.0183658
CBLL1	642.151	-1.07996	0.182515	-5.91712	3.28e-09	4.13e-08
HELZ	1068.78	-1.08052	0.156528	-6.90306	5.09e-12	1.1e-10
SLC44A1	1260.96	-1.08098	0.225104	-4.80213	1.57e-06	1.14e-05
PPP2R3A	547.7	-1.08107	0.163578	-6.60894	3.87e-11	7.13e-10
BPNT1	479.402	-1.08182	0.247522	-4.37057	1.24e-05	7.43e-05
MBNL1	5188.57	-1.08187	0.174228	-6.20948	5.32e-10	7.81e-09
SMAD7	173.463	-1.08189	0.232383	-4.65562	3.23e-06	2.21e-05
ABCB7	230.448	-1.08291	0.245908	-4.40372	1.06e-05	6.47e-05
RUNDC3B	55.2693	-1.08325	0.377807	-2.8672	0.00414121	0.0130081
RPL8	9569.67	-1.08368	0.150184	-7.21569	5.37e-13	1.36e-11
CREBZF	1069.27	-1.08547	0.152124	-7.1354	9.65e-13	2.35e-11
ABHD17B	243.628	-1.08672	0.242681	-4.47796	7.54e-06	4.72e-05
FUBP3	1393.17	-1.08798	0.201716	-5.39363	6.9e-08	6.64e-07
ANP32E	5144.84	-1.08826	0.134901	-8.06706	7.2e-16	2.91e-14
LRRFIP1	5595.17	-1.08855	0.152997	-7.11483	1.12e-12	2.69e-11
SART1	250.969	-1.08895	0.241616	-4.50696	6.58e-06	4.18e-05
MYO1H	39.926	-1.08899	0.455519	-2.39067	0.0168179	0.0435604
CEP120	407.372	-1.08989	0.210211	-5.18474	2.16e-07	1.9e-06
TBL1XR1	2938.67	-1.0899	0.170987	-6.37415	1.84e-10	2.97e-09
ETNK1	1116.01	-1.09001	0.167505	-6.50736	7.65e-11	1.33e-09
TBC1D15	837.662	-1.09055	0.185271	-5.88622	3.95e-09	4.92e-08
PRR11	4428.66	-1.09062	0.228401	-4.77503	1.8e-06	1.3e-05
UBLCP1	2837.6	-1.09089	0.136188	-8.01018	1.15e-15	4.52e-14
APOOL	630.813	-1.09119	0.175626	-6.21315	5.19e-10	7.64e-09
LNX1	150.99	-1.09269	0.25592	-4.26965	1.96e-05	0.000112883
OSBPL8	3039.77	-1.09308	0.166187	-6.57744	4.79e-11	8.72e-10
GCFC2	737.939	-1.09335	0.171405	-6.37874	1.79e-10	2.88e-09
SERINC3	6886.07	-1.09415	0.164824	-6.63829	3.17e-11	5.99e-10
PIK3CB	661.625	-1.09554	0.224404	-4.88199	1.05e-06	8e-06
PRSS3	865.411	-1.09561	0.210499	-5.20482	1.94e-07	1.72e-06
PANK1	173.351	-1.09681	0.235254	-4.66221	3.13e-06	2.14e-05
ZNF546	136.781	-1.09731	0.278132	-3.9453	7.97e-05	0.000392682
FUT8	3135.4	-1.09743	0.15968	-6.87271	6.3e-12	1.34e-10
NDUFA1	4558.52	-1.09746	0.208317	-5.26823	1.38e-07	1.27e-06
SLC19A2	315.342	-1.09749	0.266915	-4.11176	3.93e-05	0.000209841
SLC35E1	2508.69	-1.09792	0.218825	-5.01734	5.24e-07	4.24e-06
TRIB1	621.711	-1.10003	0.258905	-4.24878	2.15e-05	0.000122714
MOB1B	480.2	-1.10063	0.21055	-5.2274	1.72e-07	1.55e-06
SHOC2	1088.25	-1.10072	0.202193	-5.44392	5.21e-08	5.14e-07
SMEK1	1540.14	-1.10094	0.169007	-6.51416	7.31e-11	1.27e-09
HPRT1	2111.7	-1.10146	0.168707	-6.52882	6.63e-11	1.17e-09
TTC33	421.877	-1.10164	0.17842	-6.17443	6.64e-10	9.56e-09
USP38	576.272	-1.10189	0.154029	-7.15377	8.44e-13	2.09e-11
PANK3	1029.32	-1.10203	0.149553	-7.36879	1.72e-13	4.74e-12
C11orf30	814.857	-1.10213	0.166983	-6.60026	4.1e-11	7.52e-10
TXNDC16	44.2295	-1.10331	0.460918	-2.39372	0.0166785	0.0432645
RAB5A	2476.08	-1.1034	0.147009	-7.50561	6.11e-14	1.82e-12
ABCD3	1049.57	-1.10398	0.170348	-6.48076	9.13e-11	1.56e-09
GOLGA6L5P	25.241	-1.10424	0.439864	-2.51042	0.0120588	0.0328425
CEP170	2549.14	-1.10433	0.157728	-7.00148	2.53e-12	5.73e-11
SRGAP2D	225.55	-1.10501	0.229375	-4.81751	1.45e-06	1.07e-05
DIXDC1	181.722	-1.10531	0.229819	-4.80946	1.51e-06	1.11e-05
ARNTL2	928.785	-1.1055	0.204506	-5.40572	6.45e-08	6.26e-07
GMFB	6992.69	-1.10638	0.146093	-7.57308	3.64e-14	1.11e-12
CDYL	802.369	-1.10657	0.182999	-6.04687	1.48e-09	2e-08
USP28	295.682	-1.10693	0.184729	-5.99219	2.07e-09	2.71e-08
CASD1	364.259	-1.10722	0.179119	-6.18151	6.35e-10	9.18e-09
ACBD5	847.897	-1.10734	0.17395	-6.36584	1.94e-10	3.11e-09
FAM49B	5098.02	-1.10759	0.179678	-6.16432	7.08e-10	1.01e-08
GPR18	73.1959	-1.10773	0.347557	-3.18718	0.00143665	0.00516773
CDR2	466.94	-1.10794	0.175337	-6.3189	2.63e-10	4.13e-09
MXD1	482.396	-1.10806	0.166845	-6.64125	3.11e-11	5.88e-10
ANKRD44	249.118	-1.10821	0.207536	-5.33987	9.3e-08	8.76e-07
LIN7C	3160.28	-1.10897	0.173668	-6.38557	1.71e-10	2.76e-09
VPS54	416.887	-1.10987	0.188109	-5.90014	3.63e-09	4.53e-08
LYN	344.559	-1.11007	0.228622	-4.85549	1.2e-06	9.02e-06
TMX3	756.738	-1.11124	0.201231	-5.5222	3.35e-08	3.44e-07
FAM120A	3785.57	-1.11136	0.194403	-5.71676	1.09e-08	1.25e-07
BUB1B	1220.21	-1.11153	0.189852	-5.85472	4.78e-09	5.87e-08
PSMD10	3860.03	-1.11176	0.201285	-5.52331	3.33e-08	3.43e-07
JARID2	927.232	-1.11218	0.187574	-5.92926	3.04e-09	3.86e-08
SMAD5	2532.22	-1.11261	0.146499	-7.59463	3.09e-14	9.47e-13
ELL	314.788	-1.11263	0.214461	-5.18805	2.13e-07	1.87e-06
PRR26	108.548	-1.11296	0.336651	-3.30598	0.000946452	0.00358156
C11orf82	650.816	-1.11344	0.183334	-6.0733	1.25e-09	1.72e-08
SYT1	319.389	-1.11352	0.263786	-4.22128	2.43e-05	0.000137117
PFKL	108.606	-1.11372	0.27484	-4.05224	5.07e-05	0.000262801
DDX6	2196.61	-1.11642	0.142298	-7.84562	4.31e-15	1.53e-13
LIG4	164.599	-1.11752	0.253313	-4.41163	1.03e-05	6.26e-05
BRMS1L	897.709	-1.11792	0.15173	-7.36779	1.73e-13	4.77e-12
ARMCX2	869.163	-1.11812	0.218963	-5.10643	3.28e-07	2.78e-06
C2CD5	507.46	-1.11828	0.170321	-6.56572	5.18e-11	9.34e-10
CEP85L	426.418	-1.119	0.268278	-4.17103	3.03e-05	0.000166234
TRPC1	158.616	-1.11908	0.243588	-4.59414	4.35e-06	2.9e-05
SCYL2	590.354	-1.12035	0.166365	-6.73425	1.65e-11	3.28e-10
SRSF8	1902.38	-1.12049	0.143078	-7.83133	4.83e-15	1.69e-13
KIAA1524	1130.72	-1.12175	0.166398	-6.74137	1.57e-11	3.14e-10
SPRY2	1218.23	-1.12313	0.178436	-6.29429	3.09e-10	4.75e-09
PIGA	183.967	-1.12352	0.266886	-4.20975	2.56e-05	0.000143306
CEP44	411.408	-1.1237	0.181678	-6.1851	6.21e-10	9e-09
ARL13B	1837.37	-1.12393	0.13526	-8.3094	9.62e-17	4.59e-15
XIRP2	38.6137	-1.12446	0.392535	-2.86462	0.00417507	0.0130778
TMEM168	428.555	-1.12475	0.222239	-5.06098	4.17e-07	3.44e-06
PYROXD1	110.733	-1.12509	0.349891	-3.21556	0.00130192	0.00472965
SLCO1B3	667.29	-1.12521	0.260106	-4.32598	1.52e-05	8.94e-05
ZDHHC17	1022.42	-1.12549	0.155302	-7.2471	4.26e-13	1.1e-11
UHRF1	1805.17	-1.12565	0.169108	-6.65642	2.81e-11	5.34e-10
TMCO2	43.7946	-1.12663	0.436892	-2.57874	0.009916	0.0277768
LOC100506710	729.034	-1.12726	0.198229	-5.68664	1.3e-08	1.46e-07
RASA2	265.763	-1.12755	0.200256	-5.63055	1.8e-08	1.96e-07
SLC26A2	1141.45	-1.12776	0.217476	-5.18569	2.15e-07	1.89e-06
MAPK8	1616.48	-1.12969	0.150611	-7.50073	6.35e-14	1.87e-12
THAP10	381.025	-1.13056	0.231817	-4.87694	1.08e-06	8.18e-06
NF1	979.025	-1.13121	0.166269	-6.80349	1.02e-11	2.12e-10
SLC25A30	320.396	-1.13217	0.280663	-4.0339	5.49e-05	0.000281593
SCML1	987.825	-1.13395	0.144892	-7.82617	5.03e-15	1.76e-13
ELL2	3017.13	-1.13401	0.145255	-7.80699	5.86e-15	2.02e-13
DEPDC1	2290.74	-1.1351	0.148914	-7.6225	2.49e-14	7.82e-13
SGMS2	928.158	-1.13588	0.161697	-7.02473	2.14e-12	4.94e-11
GMFG	202.372	-1.13614	0.236433	-4.80534	1.54e-06	1.13e-05
TRDMT1	497.06	-1.13662	0.201206	-5.64902	1.61e-08	1.78e-07
GLTSCR2	236.809	-1.13718	0.239821	-4.74181	2.12e-06	1.5e-05
DOCK4	1063.72	-1.13759	0.153346	-7.41846	1.18e-13	3.37e-12
SAV1	2262.19	-1.13893	0.136423	-8.34851	6.91e-17	3.38e-15
SMIM15	2369.2	-1.13914	0.160993	-7.07568	1.49e-12	3.51e-11
CHMP2A	1943.82	-1.1409	0.163654	-6.97143	3.14e-12	6.98e-11
STARD8	55.3381	-1.14117	0.335008	-3.40639	0.000658278	0.00259675
GLCE	374.003	-1.14241	0.208685	-5.47435	4.39e-08	4.41e-07
TRAPPC8	924.927	-1.14311	0.154964	-7.37661	1.62e-13	4.5e-12
GAR1	1151.27	-1.14356	0.184652	-6.19305	5.9e-10	8.59e-09
DYNC2H1	555.543	-1.14374	0.204065	-5.60479	2.09e-08	2.24e-07
SSFA2	4811.1	-1.14455	0.124863	-9.16646	4.89e-20	3.66e-18
MAK	300.766	-1.14476	0.238341	-4.80302	1.56e-06	1.14e-05
CDK1	10562.5	-1.14486	0.190885	-5.99765	2e-09	2.63e-08
POLK	1070.3	-1.14533	0.156771	-7.30571	2.76e-13	7.36e-12
TAB3	253.462	-1.14592	0.236889	-4.83737	1.32e-06	9.79e-06
PCOLCE	54.7895	-1.14702	0.366551	-3.12921	0.00175278	0.00615135
RBM12B	530.429	-1.14767	0.164502	-6.97666	3.02e-12	6.75e-11
EAF1	1038.52	-1.14776	0.214087	-5.36116	8.27e-08	7.86e-07
LEMD3	405.333	-1.14814	0.21101	-5.44114	5.29e-08	5.21e-07
LYSMD3	453.095	-1.14905	0.182645	-6.29118	3.15e-10	4.83e-09
FRS2	738.353	-1.14913	0.170085	-6.75624	1.42e-11	2.87e-10
GNA13	1829.17	-1.14953	0.192901	-5.95919	2.53e-09	3.28e-08
LOC101927817	45.109	-1.14979	0.425562	-2.70181	0.00689635	0.0201779
GPR17	55.7742	-1.14993	0.374133	-3.07358	0.00211506	0.00724321
MST4	94.9743	-1.15082	0.280142	-4.10798	3.99e-05	0.000212588
ZNF460	84.9904	-1.15152	0.319579	-3.60323	0.000314292	0.00133572
SLC30A4	67.9377	-1.15277	0.368289	-3.13008	0.0017476	0.0061373
TMEM161B	955.967	-1.15289	0.161227	-7.15073	8.63e-13	2.13e-11
SYTL2	197.784	-1.15322	0.25685	-4.48985	7.13e-06	4.49e-05
ZNF264	618.668	-1.15438	0.232315	-4.96904	6.73e-07	5.34e-06
UGT8	268.15	-1.15536	0.282192	-4.09425	4.24e-05	0.000224215
ALG10B	135.254	-1.15547	0.257267	-4.49134	7.08e-06	4.47e-05
SERINC5	327.702	-1.15566	0.203461	-5.68003	1.35e-08	1.51e-07
NBN	3048.22	-1.15615	0.180513	-6.40483	1.51e-10	2.47e-09
PLK4	1155.85	-1.15667	0.147408	-7.84676	4.27e-15	1.52e-13
MED13	1621.95	-1.15808	0.141855	-8.16385	3.25e-16	1.39e-14
SACM1L	1377.97	-1.15826	0.175176	-6.61196	3.79e-11	7e-10
ZNF175	199.957	-1.15851	0.240836	-4.81034	1.51e-06	1.1e-05
EGFL7	29.276	-1.15892	0.480605	-2.41138	0.0158921	0.0415746
WSB1	3266.95	-1.15909	0.167347	-6.92627	4.32e-12	9.42e-11
CMIP	306.137	-1.15927	0.323524	-3.58327	0.000339314	0.00143122
ZNF566	319.503	-1.15967	0.202287	-5.7328	9.88e-09	1.14e-07
DGKH	49.1767	-1.15981	0.371592	-3.12119	0.00180125	0.00629195
SRPX	544.351	-1.15984	0.204365	-5.67535	1.38e-08	1.55e-07
ZNF529	388.603	-1.1599	0.185814	-6.24227	4.31e-10	6.46e-09
ARHGAP21	2962.64	-1.16136	0.127775	-9.08912	9.98e-20	7.04e-18
ANTXR2	3703.86	-1.16137	0.172087	-6.74874	1.49e-11	2.99e-10
NGFRAP1	6346.3	-1.16175	0.153672	-7.55992	4.03e-14	1.22e-12
RHPN2	313.53	-1.16207	0.227174	-5.11532	3.13e-07	2.66e-06
SEL1L	1806.35	-1.16294	0.156862	-7.41377	1.23e-13	3.47e-12
IGIP	272.526	-1.16347	0.247764	-4.69589	2.65e-06	1.85e-05
ARHGAP5	4910.39	-1.16362	0.15933	-7.30318	2.81e-13	7.48e-12
NPHP3	230.142	-1.16544	0.254617	-4.57722	4.71e-06	3.11e-05
SLC36A4	1505.68	-1.16582	0.120623	-9.665	4.25e-22	4.17e-20
ZBTB10	354.435	-1.16583	0.258616	-4.50795	6.55e-06	4.17e-05
CSTF2T	599.836	-1.16627	0.157537	-7.40314	1.33e-13	3.74e-12
PRDM2	497.772	-1.16634	0.27775	-4.19924	2.68e-05	0.000149106
STRN	936.47	-1.16653	0.192995	-6.04432	1.5e-09	2.03e-08
SASH1	584.372	-1.16717	0.167225	-6.97965	2.96e-12	6.61e-11
XPOT	1278.18	-1.16738	0.174758	-6.67998	2.39e-11	4.61e-10
GRN	1292.34	-1.16738	0.228127	-5.11725	3.1e-07	2.64e-06
SEMA3C	876.84	-1.16743	0.224361	-5.20335	1.96e-07	1.73e-06
APBB1IP	472.735	-1.16784	0.216971	-5.38247	7.35e-08	7.03e-07
PLSCR4	195.691	-1.16881	0.23236	-5.03016	4.9e-07	3.99e-06
MOCS1	164.575	-1.1694	0.223242	-5.23825	1.62e-07	1.47e-06
PIK3C2A	598.234	-1.16949	0.226672	-5.15941	2.48e-07	2.15e-06
RBM41	752.828	-1.16963	0.180108	-6.49408	8.35e-11	1.44e-09
LOC100505812	270.789	-1.17082	0.306488	-3.82012	0.000133389	0.000622641
ACTR2	6409.59	-1.17094	0.170452	-6.86963	6.44e-12	1.36e-10
SLC25A40	197.886	-1.17103	0.244617	-4.7872	1.69e-06	1.23e-05
MXI1	1081.77	-1.17104	0.167394	-6.99571	2.64e-12	5.93e-11
RGS17	505.478	-1.17161	0.203295	-5.7631	8.26e-09	9.69e-08
BRCC3	856.68	-1.17174	0.153866	-7.61535	2.63e-14	8.2e-13
SPDYE1	106.53	-1.17333	0.256178	-4.58015	4.65e-06	3.07e-05
CTSF	81.1287	-1.17405	0.33075	-3.54966	0.000385731	0.00160844
LOC101928731	15.4179	-1.17504	0.486029	-2.41764	0.0156215	0.0409759
ZNF720	48.8118	-1.17505	0.380407	-3.08893	0.00200882	0.00691858
CRLF3	843.225	-1.17537	0.16958	-6.93106	4.18e-12	9.14e-11
PRRG1	89.7396	-1.1757	0.338596	-3.47227	0.000516072	0.0020909
ZNF721	212.935	-1.1773	0.317126	-3.71242	0.00020529	0.000914522
UPF3B	2186.97	-1.17777	0.162926	-7.22892	4.87e-13	1.24e-11
SYNGR1	14.5071	-1.17989	0.505001	-2.33641	0.0194698	0.0492449
RRBP1	738.779	-1.18041	0.185325	-6.36941	1.9e-10	3.06e-09
MORF4L2	5127.85	-1.18053	0.173809	-6.79212	1.11e-11	2.27e-10
HTR1D	132.588	-1.18219	0.317662	-3.72154	0.00019801	0.000887376
LOC145474	95.7104	-1.18223	0.376369	-3.14114	0.0016829	0.00594463
CPEB3	119.291	-1.1836	0.343211	-3.44862	0.000563467	0.00226193
C8orf37	106.867	-1.18452	0.287579	-4.11892	3.81e-05	0.000203966
SNORA8	77.3721	-1.18473	0.294824	-4.01842	5.86e-05	0.000298393
GMCL1	466.877	-1.18691	0.207342	-5.72442	1.04e-08	1.2e-07
ETV1	3010.3	-1.18824	0.175259	-6.77993	1.2e-11	2.46e-10
RAB12	298.497	-1.18855	0.286616	-4.14683	3.37e-05	0.000182898
YTHDF3	781.405	-1.18866	0.151026	-7.87058	3.53e-15	1.29e-13
DNAJB14	1236.34	-1.19007	0.154073	-7.72406	1.13e-14	3.73e-13
RAB6A	2913.95	-1.19017	0.131736	-9.03444	1.65e-19	1.11e-17
LACTB2	445.469	-1.19119	0.291395	-4.08789	4.35e-05	0.000229751
FNDC3B	3322.23	-1.19126	0.159952	-7.4476	9.51e-14	2.74e-12
GPATCH4	1014.92	-1.1915	0.201916	-5.90098	3.61e-09	4.51e-08
TFPI2	1425.1	-1.19192	0.18893	-6.30878	2.81e-10	4.38e-09
TMED7	1829.4	-1.19207	0.1746	-6.82745	8.64e-12	1.81e-10
MED14	807.194	-1.19306	0.188957	-6.31395	2.72e-10	4.24e-09
MDFIC	1211.75	-1.1938	0.159983	-7.46204	8.52e-14	2.47e-12
RC3H1	1095.36	-1.19411	0.177812	-6.71561	1.87e-11	3.67e-10
NEGR1	123.972	-1.19443	0.321726	-3.71258	0.000205159	0.000914195
MPP1	52.9159	-1.19489	0.352226	-3.3924	0.000692828	0.00271871
SLC38A2	8208.44	-1.19637	0.144934	-8.25457	1.52e-16	7.05e-15
HERC4	1099.12	-1.19678	0.183994	-6.50444	7.8e-11	1.35e-09
CNOT6L	378.128	-1.19708	0.192517	-6.21808	5.03e-10	7.43e-09
E2F3	1628.91	-1.19733	0.207006	-5.78402	7.29e-09	8.71e-08
KAT6A	1017.32	-1.19951	0.201043	-5.96644	2.42e-09	3.15e-08
FGF13	39.9396	-1.20061	0.405922	-2.95774	0.00309906	0.0101253
RLIM	1270.2	-1.20089	0.194658	-6.16924	6.86e-10	9.84e-09
CADM2	24.8817	-1.20093	0.466041	-2.57688	0.00996973	0.0278925
MAGI1-AS1	104.671	-1.2016	0.28764	-4.17746	2.95e-05	0.000162175
APP	688.711	-1.20169	0.206413	-5.82178	5.82e-09	7.04e-08
TEAD1	4440.95	-1.20207	0.180386	-6.66389	2.67e-11	5.1e-10
TMEM181	789.032	-1.20323	0.19305	-6.23274	4.58e-10	6.84e-09
DGCR6L	162.683	-1.20374	0.273901	-4.39482	1.11e-05	6.71e-05
LIN54	356.287	-1.20447	0.187639	-6.41909	1.37e-10	2.26e-09
MED23	403.984	-1.20522	0.179712	-6.70641	1.99e-11	3.89e-10
PDCD4	343.703	-1.20599	0.187999	-6.41486	1.41e-10	2.32e-09
RNF128	117.846	-1.2061	0.283524	-4.25395	2.1e-05	0.000120133
PAFAH1B2	8934.84	-1.20702	0.169497	-7.12121	1.07e-12	2.57e-11
FCF1	868.687	-1.20705	0.248696	-4.85352	1.21e-06	9.11e-06
ANKRD50	997.6	-1.20824	0.177856	-6.79337	1.1e-11	2.26e-10
ALDH1L2	30.0263	-1.20863	0.488886	-2.47221	0.013428	0.0359728
PPARA	212.98	-1.20886	0.227382	-5.31642	1.06e-07	9.89e-07
RYBP	1141.92	-1.20907	0.203992	-5.92708	3.08e-09	3.9e-08
TPD52	1050.28	-1.20913	0.185589	-6.51509	7.26e-11	1.27e-09
DOCK9	670.566	-1.20921	0.209249	-5.77882	7.52e-09	8.95e-08
LINC01139	147.141	-1.20981	0.288056	-4.1999	2.67e-05	0.00014873
FAM3C	2689.88	-1.20992	0.141804	-8.53239	1.43e-17	7.71e-16
SP2	543.552	-1.21031	0.179149	-6.75588	1.42e-11	2.87e-10
CDK19	360.819	-1.21061	0.221543	-5.46446	4.64e-08	4.65e-07
QPCT	163.393	-1.21062	0.270851	-4.46968	7.83e-06	4.88e-05
ENPP4	431.033	-1.21155	0.169728	-7.13814	9.46e-13	2.3e-11
MZT1	3146.64	-1.2124	0.14913	-8.12984	4.3e-16	1.81e-14
PGM2L1	918.125	-1.21267	0.184569	-6.57024	5.02e-11	9.11e-10
SEC24A	327.333	-1.21338	0.176627	-6.86975	6.43e-12	1.36e-10
SENP1	830.491	-1.21462	0.152996	-7.93891	2.04e-15	7.74e-14
CUEDC2	456.718	-1.21468	0.229397	-5.29508	1.19e-07	1.1e-06
SIL1	380.245	-1.21564	0.288496	-4.2137	2.51e-05	0.000141024
ATP5L2	20.539	-1.21627	0.505914	-2.4041	0.0162125	0.0422817
SLMO2	2946.95	-1.21775	0.157841	-7.71507	1.21e-14	3.98e-13
ZNF493	226.459	-1.21873	0.215192	-5.66344	1.48e-08	1.65e-07
PIK3CA	469.614	-1.2193	0.211314	-5.77008	7.92e-09	9.35e-08
ZNF654	415.975	-1.22005	0.1887	-6.46555	1.01e-10	1.71e-09
ID2	52.8898	-1.22068	0.366724	-3.3286	0.000872834	0.00333187
GK5	202.726	-1.22193	0.273093	-4.47442	7.66e-06	4.79e-05
LAMP2	2420.86	-1.22207	0.127181	-9.60888	7.33e-22	6.9e-20
PURB	2349.1	-1.22227	0.18738	-6.52293	6.89e-11	1.21e-09
SLC35A3	580.351	-1.22232	0.185805	-6.57849	4.75e-11	8.67e-10
CDA	69.2785	-1.22329	0.358582	-3.41147	0.000646127	0.00255717
EXOC5	2229.19	-1.22394	0.161534	-7.57697	3.54e-14	1.08e-12
ARHGEF9	74.8481	-1.22429	0.395788	-3.0933	0.00197946	0.00682493
CLTB	1673.69	-1.22533	0.167526	-7.31428	2.59e-13	6.95e-12
ZDHHC21	264.431	-1.22627	0.189708	-6.46399	1.02e-10	1.73e-09
TRAM1	4436.57	-1.22708	0.149863	-8.18803	2.66e-16	1.17e-14
DLEU2L	26.0505	-1.2271	0.481378	-2.54915	0.0107987	0.0298871
MURC	116.877	-1.22743	0.323867	-3.78991	0.000150705	0.000694798
RRM2B	550.298	-1.22803	0.200713	-6.1183	9.46e-10	1.32e-08
LRRC58	1773.85	-1.23022	0.160395	-7.66991	1.72e-14	5.55e-13
NUP153	1953.69	-1.23027	0.211827	-5.80787	6.33e-09	7.59e-08
GNPNAT1	2968.68	-1.2305	0.158607	-7.75819	8.62e-15	2.87e-13
PEX5L	84.3781	-1.23087	0.308983	-3.98361	6.79e-05	0.000340938
CEP135	706.863	-1.23107	0.194949	-6.31482	2.7e-10	4.23e-09
ZNF594	41.3603	-1.23133	0.412602	-2.98431	0.00284221	0.00936987
LINC00704	6334.06	-1.23135	0.157844	-7.80107	6.14e-15	2.11e-13
LOC286437	129.79	-1.23164	0.288818	-4.26441	2e-05	0.000115203
TRMT11	472.285	-1.23396	0.310159	-3.97848	6.94e-05	0.000347165
PPP1CC	7614.48	-1.23407	0.163578	-7.54427	4.55e-14	1.37e-12
VMA21	2791.64	-1.23423	0.173598	-7.10969	1.16e-12	2.78e-11
GCNT7	21.4231	-1.23429	0.505107	-2.44361	0.0145409	0.0385014
GNAI1	460.869	-1.23507	0.222859	-5.54193	2.99e-08	3.1e-07
SCML2	103.268	-1.2355	0.301116	-4.10307	4.08e-05	0.000216707
LBR	2459.82	-1.23579	0.192962	-6.40432	1.51e-10	2.47e-09
GOLPH3	2847.09	-1.2358	0.159626	-7.74187	9.8e-15	3.25e-13
ACBD3	1146.22	-1.23646	0.17329	-7.13518	9.67e-13	2.35e-11
DPY19L1	1348.02	-1.23676	0.198757	-6.22248	4.89e-10	7.25e-09
ARHGAP30	228.549	-1.23677	0.245645	-5.0348	4.78e-07	3.91e-06
IGFBP1	1623.81	-1.23679	0.173007	-7.14879	8.75e-13	2.15e-11
PBDC1	2853.97	-1.23737	0.127339	-9.71714	2.55e-22	2.55e-20
CPEB2	403.452	-1.23737	0.310728	-3.98217	6.83e-05	0.000342469
STEAP2	232.016	-1.23754	0.32937	-3.7573	0.000171756	0.000780629
SPAST	467.746	-1.23836	0.187007	-6.622	3.54e-11	6.6e-10
MIB1	1205.59	-1.23839	0.199628	-6.20348	5.52e-10	8.08e-09
UBA52	3315.4	-1.23862	0.151371	-8.18264	2.78e-16	1.21e-14
GFPT1	1349.27	-1.23867	0.16162	-7.66411	1.8e-14	5.77e-13
VCPIP1	389.774	-1.23874	0.209754	-5.9057	3.51e-09	4.4e-08
PRDM8	644.883	-1.23889	0.200738	-6.17167	6.76e-10	9.7e-09
CENPM	1188.88	-1.23906	0.173918	-7.12438	1.05e-12	2.53e-11
LANCL3	37.0876	-1.23907	0.461178	-2.68676	0.00721497	0.0210162
SMIM17	18.6334	-1.23936	0.514975	-2.40665	0.0160996	0.0420404
SMAD1	711.813	-1.24118	0.183075	-6.7796	1.21e-11	2.46e-10
KIAA1468	298.068	-1.2413	0.215269	-5.76627	8.1e-09	9.55e-08
TOP1MT	219.017	-1.2435	0.305877	-4.06534	4.8e-05	0.000250106
CTGF	16537.2	-1.24404	0.163272	-7.61947	2.55e-14	7.97e-13
HIATL1	2602.4	-1.24484	0.184435	-6.74951	1.48e-11	2.98e-10
TFAP2A	103.336	-1.24485	0.279884	-4.44775	8.68e-06	5.37e-05
MKLN1	1349.03	-1.24586	0.213173	-5.84437	5.08e-09	6.22e-08
OCRL	578.107	-1.2463	0.200185	-6.22572	4.79e-10	7.12e-09
BLOC1S6	1799.71	-1.2469	0.166248	-7.50025	6.37e-14	1.88e-12
MAP3K7	736.687	-1.24778	0.207964	-5.99996	1.97e-09	2.6e-08
CRIM1	3267.57	-1.24832	0.178414	-6.99676	2.62e-12	5.9e-11
INSIG2	769.975	-1.24844	0.177882	-7.01833	2.25e-12	5.14e-11
FAM13A-AS1	33.5519	-1.24915	0.381288	-3.27614	0.00105235	0.00392744
NFIA	1125.73	-1.2502	0.182401	-6.85414	7.17e-12	1.51e-10
RAP2B	1878.71	-1.25118	0.153712	-8.13981	3.96e-16	1.68e-14
FAM127A	1324.27	-1.25163	0.164759	-7.59671	3.04e-14	9.34e-13
NCOA3	984.666	-1.25168	0.157017	-7.97165	1.57e-15	6.07e-14
TWF1	2067.9	-1.25179	0.153948	-8.13125	4.25e-16	1.79e-14
CCNG2	720.228	-1.25335	0.180179	-6.95614	3.5e-12	7.75e-11
PDGFC	2264.1	-1.25368	0.139154	-9.00935	2.07e-19	1.38e-17
RAB3GAP1	844.125	-1.25413	0.203652	-6.15822	7.36e-10	1.05e-08
NLGN1	136.056	-1.2545	0.280061	-4.47937	7.49e-06	4.69e-05
SLK	2591.43	-1.25521	0.167333	-7.50125	6.32e-14	1.87e-12
SP3	1672.09	-1.25613	0.15412	-8.1503	3.63e-16	1.54e-14
RPL11	2602.1	-1.25676	0.197805	-6.35353	2.1e-10	3.36e-09
RPA3OS	481.734	-1.25736	0.246223	-5.10657	3.28e-07	2.78e-06
THOC2	2283.22	-1.2587	0.134564	-9.35392	8.45e-21	7.02e-19
TRIQK	954.684	-1.25925	0.170835	-7.37115	1.69e-13	4.66e-12
ZNF521	419.091	-1.25939	0.199441	-6.3146	2.71e-10	4.23e-09
MMP24-AS1	157.376	-1.26027	0.296084	-4.25646	2.08e-05	0.000118963
FAM76B	987.994	-1.26067	0.159102	-7.92365	2.31e-15	8.67e-14
SLC25A36	2567.52	-1.26105	0.150831	-8.36068	6.24e-17	3.1e-15
POLR3G	1011.71	-1.2625	0.181795	-6.94461	3.79e-12	8.37e-11
CSNK1G3	1468.46	-1.26611	0.154211	-8.21022	2.21e-16	9.91e-15
AKAP14	15.8357	-1.26793	0.527695	-2.40277	0.0162714	0.0424044
CUL5	2251.18	-1.26814	0.159332	-7.95912	1.73e-15	6.66e-14
STRN3	907.817	-1.26838	0.162993	-7.78182	7.15e-15	2.44e-13
ROBO2	50.3945	-1.26896	0.411744	-3.08191	0.00205676	0.00706667
PIN1	527.226	-1.26897	0.203098	-6.24807	4.16e-10	6.25e-09
ARHGAP42	455.617	-1.27094	0.225817	-5.62819	1.82e-08	1.98e-07
LRRC45	33.5218	-1.27138	0.457237	-2.78056	0.0054265	0.0164375
ASIC3	18.6732	-1.27215	0.517577	-2.45789	0.0139755	0.0372111
MICB	1026.29	-1.27299	0.17268	-7.37195	1.68e-13	4.64e-12
SIGIRR	68.0254	-1.27382	0.363796	-3.50148	0.000462689	0.00189465
SEC24D	568.337	-1.27479	0.162958	-7.82284	5.16e-15	1.8e-13
YAP1	2898.93	-1.27655	0.147027	-8.68241	3.87e-18	2.24e-16
ZBTB11	700.576	-1.27665	0.182149	-7.00884	2.4e-12	5.47e-11
RNF138P1	16.734	-1.27676	0.526296	-2.42594	0.0152688	0.040178
SLC18B1	232.106	-1.27722	0.23429	-5.45142	5e-08	4.95e-07
ELAVL1	5208.85	-1.27848	0.180346	-7.08902	1.35e-12	3.2e-11
C8orf44	67.5394	-1.27891	0.338411	-3.77915	0.000157366	0.000722541
KLHDC1	82.8291	-1.27924	0.295488	-4.32925	1.5e-05	8.82e-05
STK4	2816.63	-1.28194	0.164902	-7.77395	7.61e-15	2.59e-13
SPC24	84.387	-1.28205	0.311199	-4.1197	3.79e-05	0.000203435
RNF180	102.413	-1.28305	0.344562	-3.72373	0.000196303	0.000881233
C3orf58	285.744	-1.28343	0.24379	-5.26449	1.41e-07	1.29e-06
RRS1	227.235	-1.28377	0.211775	-6.06196	1.34e-09	1.83e-08
LATS1	564.1	-1.28407	0.176835	-7.2614	3.83e-13	9.97e-12
NUS1	1165.7	-1.2885	0.206271	-6.24662	4.19e-10	6.31e-09
AEBP2	660.49	-1.29014	0.211305	-6.10556	1.02e-09	1.42e-08
NAA10	431.967	-1.29027	0.209402	-6.1617	7.2e-10	1.03e-08
FGD6	871.025	-1.29168	0.191089	-6.75956	1.38e-11	2.81e-10
HS2ST1	658.639	-1.29206	0.220036	-5.87201	4.31e-09	5.33e-08
AFTPH	1549.12	-1.29253	0.146903	-8.79852	1.39e-18	8.61e-17
PDK1	473.216	-1.29255	0.201408	-6.41758	1.38e-10	2.28e-09
CSGALNACT2	1761.06	-1.29258	0.171342	-7.54386	4.56e-14	1.37e-12
CUL4B	1603.9	-1.29285	0.207502	-6.23055	4.65e-10	6.92e-09
BNIP3	4529.13	-1.29452	0.195088	-6.63557	3.23e-11	6.08e-10
C1D	1820.89	-1.29539	0.185312	-6.99031	2.74e-12	6.16e-11
BST2	812.902	-1.29552	0.190135	-6.81366	9.51e-12	1.98e-10
C16orf13	314.146	-1.29559	0.176783	-7.32868	2.32e-13	6.31e-12
SNORD5	21.5509	-1.29693	0.470699	-2.75533	0.00586322	0.0175707
ASB3	123.445	-1.29701	0.287266	-4.51502	6.33e-06	4.05e-05
SNF8	1491.65	-1.29715	0.146303	-8.86619	7.57e-19	4.78e-17
SUZ12	3217.26	-1.29718	0.179454	-7.22845	4.89e-13	1.24e-11
C18orf25	980.855	-1.29749	0.162634	-7.97794	1.49e-15	5.8e-14
LINC01209	19.6226	-1.29749	0.493264	-2.63042	0.00852789	0.0243751
SPDYE5	53.9459	-1.29796	0.345804	-3.75345	0.000174416	0.000791572
ATP11B	1116.85	-1.29963	0.152847	-8.50283	1.85e-17	9.82e-16
TTC25	11.8925	-1.29996	0.546069	-2.38057	0.017286	0.0446046
RB1CC1	1559.55	-1.30002	0.193986	-6.70161	2.06e-11	4.02e-10
GCH1	133.561	-1.3002	0.269285	-4.82833	1.38e-06	1.02e-05
CCNG1	1338.32	-1.30072	0.16591	-7.83987	4.51e-15	1.59e-13
VPS28	477.631	-1.30226	0.191011	-6.81772	9.25e-12	1.93e-10
AKAP11	1164.4	-1.30238	0.196365	-6.63242	3.3e-11	6.2e-10
SYNJ1	164.281	-1.30254	0.314865	-4.13682	3.52e-05	0.000190267
LRCH1	456.813	-1.30332	0.18463	-7.0591	1.68e-12	3.93e-11
IRAK1	507.889	-1.3035	0.172228	-7.56847	3.78e-14	1.15e-12
HACE1	123.375	-1.30464	0.239179	-5.45464	4.91e-08	4.87e-07
MBNL3	330.791	-1.30532	0.233151	-5.59858	2.16e-08	2.32e-07
GPR132	303.707	-1.30598	0.223732	-5.83728	5.31e-09	6.45e-08
GAMT	131.117	-1.30629	0.283967	-4.60017	4.22e-06	2.82e-05
PTP4A1	3939.51	-1.30641	0.155637	-8.39393	4.7e-17	2.37e-15
KIF14	1410.61	-1.3066	0.205675	-6.35271	2.12e-10	3.38e-09
SLC35F5	379.213	-1.30727	0.2196	-5.95299	2.63e-09	3.39e-08
PCDHB9	185.626	-1.30751	0.308931	-4.23237	2.31e-05	0.000131117
USP53	714.679	-1.30854	0.189114	-6.9193	4.54e-12	9.84e-11
RAD21	12508	-1.3086	0.183093	-7.1472	8.86e-13	2.17e-11
RMND5A	1089.5	-1.30894	0.197782	-6.61808	3.64e-11	6.77e-10
FOXP2	182.797	-1.3102	0.351946	-3.72272	0.000197084	0.000883982
HSPA1A	457.264	-1.31029	0.270887	-4.83706	1.32e-06	9.8e-06
CLASP2	886.163	-1.31087	0.213982	-6.12606	9.01e-10	1.26e-08
CCPG1	228.038	-1.31097	0.268047	-4.89083	1e-06	7.69e-06
ATRX	3765.62	-1.31127	0.154302	-8.49812	1.93e-17	1.02e-15
ZNF440	180.639	-1.31177	0.282061	-4.65067	3.31e-06	2.26e-05
ECT2	3745.59	-1.31298	0.187067	-7.01877	2.24e-12	5.13e-11
FNDC3A	1724.15	-1.31323	0.164884	-7.96458	1.66e-15	6.4e-14
CHUK	935.122	-1.31575	0.160414	-8.20217	2.36e-16	1.05e-14
KDM7A	41.4666	-1.31657	0.411815	-3.197	0.00138866	0.00501346
LMNB1	745.741	-1.31696	0.176164	-7.47573	7.68e-14	2.24e-12
BMS1P5	138.024	-1.31875	0.274379	-4.80631	1.54e-06	1.12e-05
SNORA18	52.1305	-1.31923	0.328161	-4.02008	5.82e-05	0.000296501
POLR2L	1450.52	-1.3216	0.182556	-7.23946	4.5e-13	1.15e-11
FGF5	586.633	-1.32229	0.235617	-5.61203	2e-08	2.16e-07
WHAMMP3	22.7952	-1.32305	0.509863	-2.59491	0.00946154	0.0266654
PATL1	843.657	-1.32445	0.208688	-6.34653	2.2e-10	3.51e-09
ECM1	90.7377	-1.32447	0.411318	-3.22006	0.00128163	0.00466673
FAM160B1	1022.66	-1.32492	0.160724	-8.24345	1.67e-16	7.67e-15
TPP1	389.295	-1.32514	0.186155	-7.11845	1.09e-12	2.62e-11
LOC286190	27.6214	-1.32537	0.427109	-3.10312	0.00191495	0.00664188
RBM5-AS1	38.7285	-1.3259	0.405484	-3.26991	0.00107581	0.00400264
NUP43	659.116	-1.32684	0.228255	-5.81299	6.14e-09	7.38e-08
TBCEL	387.406	-1.32815	0.168134	-7.89936	2.8e-15	1.04e-13
ARGFXP2	36.7711	-1.32891	0.479668	-2.77048	0.00559735	0.0168802
PRKCSH	675.99	-1.32896	0.139826	-9.50437	2.01e-21	1.81e-19
RNASE4	81.4507	-1.32914	0.357113	-3.72189	0.000197736	0.0008864
C9orf84	26.56	-1.32928	0.448474	-2.964	0.00303671	0.00994666
MRE11A	752.467	-1.32946	0.157939	-8.41754	3.84e-17	1.95e-15
EPB41L4B	482.122	-1.3298	0.160661	-8.27706	1.26e-16	5.89e-15
ANKIB1	1031.08	-1.3298	0.207061	-6.42226	1.34e-10	2.22e-09
ADD3	1440.84	-1.32997	0.213034	-6.243	4.29e-10	6.44e-09
KCTD9	1668.17	-1.33031	0.178213	-7.46473	8.35e-14	2.42e-12
RCBTB1	383.773	-1.33058	0.219947	-6.04953	1.45e-09	1.97e-08
SLC25A21	29.36	-1.33235	0.455992	-2.92187	0.00347932	0.0112046
CNPY4	122.806	-1.33268	0.243194	-5.47991	4.26e-08	4.29e-07
FZD8	279.834	-1.3338	0.236723	-5.63442	1.76e-08	1.92e-07
ASPN	71.3	-1.33408	0.301254	-4.42843	9.49e-06	5.81e-05
RPGR	223.85	-1.33615	0.24293	-5.50013	3.8e-08	3.85e-07
HSPA1B	156.847	-1.33619	0.266334	-5.01699	5.25e-07	4.24e-06
ADAMTS1	499.143	-1.3362	0.269702	-4.95436	7.26e-07	5.72e-06
DKFZP586I1420	225.427	-1.3374	0.204265	-6.5474	5.85e-11	1.05e-09
ZMAT1	50.84	-1.338	0.360009	-3.71657	0.000201947	0.000902406
HEATR3	129.441	-1.33822	0.254865	-5.2507	1.52e-07	1.38e-06
CHML	1087.06	-1.33865	0.206001	-6.49828	8.12e-11	1.4e-09
TAF9B	344.904	-1.33981	0.17446	-7.67975	1.59e-14	5.16e-13
WEE1	2521.95	-1.33991	0.19546	-6.85516	7.12e-12	1.51e-10
KLHL8	585.12	-1.34042	0.245792	-5.45348	4.94e-08	4.9e-07
SLC2A3	781.506	-1.34091	0.192658	-6.96006	3.4e-12	7.55e-11
MED13L	1595.62	-1.34133	0.16799	-7.9846	1.41e-15	5.52e-14
CDC14A	225.233	-1.34157	0.207767	-6.4571	1.07e-10	1.8e-09
DKC1	3949.8	-1.34174	0.167084	-8.03034	9.72e-16	3.88e-14
LBX2-AS1	43.9657	-1.34247	0.36354	-3.69278	0.000221819	0.000979546
ABI1	1934.88	-1.3433	0.131858	-10.1875	2.26e-24	2.83e-22
ERCC6L	552.36	-1.34357	0.228848	-5.87104	4.33e-09	5.35e-08
CCDC147	17.062	-1.34437	0.547289	-2.45643	0.0140327	0.0373318
PCDHB13	107.403	-1.34696	0.303932	-4.43179	9.35e-06	5.74e-05
BHLHB9	198.143	-1.34852	0.331415	-4.06899	4.72e-05	0.000246797
PFKFB3	532.387	-1.3512	0.17562	-7.6939	1.43e-14	4.66e-13
CCDC15	280.145	-1.35162	0.291752	-4.63276	3.61e-06	2.44e-05
PRPS1	1097.39	-1.35193	0.241518	-5.59765	2.17e-08	2.33e-07
SLC2A13	131.49	-1.35211	0.273503	-4.94366	7.67e-07	6.01e-06
KDR	12.9321	-1.35236	0.574636	-2.35342	0.0186016	0.047423
EFCAB4A	50.7752	-1.35283	0.360996	-3.7475	0.000178607	0.000809426
ATM	1809.56	-1.35319	0.225628	-5.99744	2e-09	2.63e-08
PROS1	143.728	-1.35412	0.270849	-4.99954	5.75e-07	4.61e-06
N4BP2	262.652	-1.35416	0.261616	-5.17614	2.27e-07	1.98e-06
RPL36A	245.423	-1.35422	0.22797	-5.94034	2.84e-09	3.62e-08
MPND	18.0114	-1.3543	0.560885	-2.41457	0.0157539	0.0412542
CARD8	1004.6	-1.35612	0.148062	-9.15909	5.23e-20	3.86e-18
KLHL4	655.305	-1.35637	0.187257	-7.24337	4.38e-13	1.12e-11
TSHZ1	195.562	-1.35661	0.257868	-5.26087	1.43e-07	1.31e-06
DIAPH2	183.665	-1.35847	0.206837	-6.56784	5.11e-11	9.23e-10
SLC7A11	520.181	-1.36051	0.193049	-7.04747	1.82e-12	4.26e-11
ZFP30	131.002	-1.36172	0.304106	-4.47779	7.54e-06	4.72e-05
LINC00478	124.841	-1.36283	0.249634	-5.4593	4.78e-08	4.77e-07
RAB2B	940.516	-1.36334	0.157716	-8.64424	5.42e-18	3.09e-16
TNFRSF11A	111.194	-1.3642	0.332012	-4.10889	3.98e-05	0.000212037
YES1	1458.22	-1.36482	0.175727	-7.76672	8.05e-15	2.71e-13
SOCS5	755.585	-1.36558	0.184142	-7.41588	1.21e-13	3.43e-12
DARS	4100.41	-1.36584	0.142023	-9.61701	6.78e-22	6.41e-20
RPS6KA5	381.715	-1.36606	0.253221	-5.39475	6.86e-08	6.61e-07
STXBP5	381.467	-1.36704	0.217685	-6.2799	3.39e-10	5.15e-09
ADIRF	234.451	-1.36871	0.317761	-4.30734	1.65e-05	9.65e-05
UHMK1	4134.11	-1.36901	0.19044	-7.18868	6.54e-13	1.63e-11
TMX1	3308.36	-1.371	0.18025	-7.60613	2.82e-14	8.75e-13
ZDHHC20	1193.68	-1.37138	0.179423	-7.64328	2.12e-14	6.69e-13
PDE11A	31.773	-1.37366	0.494535	-2.77767	0.00547499	0.0165556
NAALAD2	75.0867	-1.37369	0.285619	-4.80951	1.51e-06	1.11e-05
SLC9C1	54.8565	-1.37384	0.329779	-4.16593	3.1e-05	0.00016958
PTBP3	1957.53	-1.37514	0.164081	-8.38087	5.25e-17	2.63e-15
FCHO2	940.598	-1.37519	0.18332	-7.50156	6.31e-14	1.87e-12
PTER	1200.85	-1.37554	0.146128	-9.41324	4.81e-21	4.18e-19
TMEM41B	1294.95	-1.37649	0.168683	-8.16021	3.34e-16	1.43e-14
COG6	232.594	-1.37689	0.228581	-6.02365	1.71e-09	2.28e-08
ANKRD42	210.914	-1.37731	0.231387	-5.9524	2.64e-09	3.4e-08
CPED1	132.096	-1.37767	0.33117	-4.16	3.18e-05	0.000173465
ZC3H12C	561.412	-1.37821	0.178877	-7.70479	1.31e-14	4.3e-13
EPHA7	41.5155	-1.37843	0.357081	-3.86029	0.000113253	0.000537594
TCEB2	1102.64	-1.37883	0.157284	-8.7665	1.84e-18	1.11e-16
BBS10	482.379	-1.37943	0.252518	-5.46271	4.69e-08	4.69e-07
PNPLA8	753.109	-1.38011	0.170248	-8.10646	5.21e-16	2.15e-14
JAG1	5332.35	-1.38229	0.172549	-8.01099	1.14e-15	4.5e-14
PLAC1	41.5226	-1.38257	0.409891	-3.37302	0.000743484	0.00289364
FAM199X	368.659	-1.38314	0.220176	-6.28195	3.34e-10	5.1e-09
TSSC4	240.44	-1.38318	0.27276	-5.07107	3.96e-07	3.28e-06
CCDC82	1766.58	-1.38462	0.152998	-9.04997	1.43e-19	9.77e-18
WWP1	882.631	-1.38624	0.17174	-8.07174	6.93e-16	2.81e-14
GABPA	589.894	-1.39249	0.238349	-5.84221	5.15e-09	6.28e-08
STXBP3	648.949	-1.39281	0.171736	-8.11018	5.05e-16	2.1e-14
TTC14	1487.44	-1.39313	0.193686	-7.19272	6.35e-13	1.59e-11
LOC101927921	20.6794	-1.39342	0.468273	-2.97566	0.00292357	0.00960987
NFAT5	2393.22	-1.39353	0.1372	-10.1569	3.09e-24	3.82e-22
SLITRK1	31.9009	-1.39668	0.454222	-3.07488	0.00210589	0.00721809
FEM1C	813.059	-1.39739	0.160564	-8.70302	3.23e-18	1.91e-16
STX4	216.206	-1.39766	0.248582	-5.62252	1.88e-08	2.04e-07
TRAPPC5	285.858	-1.39771	0.180223	-7.75544	8.8e-15	2.93e-13
SNRNP48	1259.07	-1.39851	0.16876	-8.28697	1.16e-16	5.45e-15
NKRF	480.121	-1.39863	0.214402	-6.52341	6.87e-11	1.21e-09
SATB1	538.736	-1.3996	0.23954	-5.84286	5.13e-09	6.27e-08
RPL3	4082.1	-1.40122	0.183916	-7.61883	2.56e-14	8e-13
LIN37	116.359	-1.40133	0.292442	-4.79182	1.65e-06	1.2e-05
EBI3	14.9443	-1.40227	0.542745	-2.58367	0.00977554	0.0274364
ZKSCAN8	754.954	-1.40283	0.178589	-7.85506	4e-15	1.44e-13
2019-03-01	83.635	-1.40373	0.38735	-3.62393	0.000290157	0.00124425
IL1RAP	579.773	-1.40591	0.151378	-9.28743	1.58e-20	1.28e-18
TTC9	74.3505	-1.40795	0.350766	-4.01392	5.97e-05	0.000303362
MMD	672.04	-1.40941	0.188565	-7.47436	7.76e-14	2.26e-12
LINC00997	118.797	-1.40953	0.310913	-4.53351	5.8e-06	3.74e-05
SUMO4	39.6146	-1.41096	0.357653	-3.94506	7.98e-05	0.000392732
DENND6A	1057.78	-1.41099	0.200666	-7.03155	2.04e-12	4.73e-11
FMR1	1154.94	-1.41141	0.188234	-7.49815	6.47e-14	1.9e-12
EPS8L1	13.593	-1.4137	0.558431	-2.53156	0.0113557	0.0311708
C7orf60	175.643	-1.41461	0.264041	-5.35755	8.44e-08	8e-07
C9orf142	279.136	-1.41624	0.199272	-7.10707	1.19e-12	2.83e-11
PRKAA1	1750.44	-1.41793	0.158456	-8.9484	3.61e-19	2.34e-17
GBE1	1492.86	-1.41928	0.160347	-8.8513	8.65e-19	5.44e-17
DENND1B	537.598	-1.42019	0.260757	-5.44638	5.14e-08	5.07e-07
FBXO33	890.707	-1.42142	0.191694	-7.41504	1.22e-13	3.45e-12
CHMP4A	648.234	-1.42309	0.171404	-8.30254	1.02e-16	4.84e-15
NRAS	3518.59	-1.42327	0.175214	-8.12304	4.55e-16	1.89e-14
C21orf91	576.423	-1.42364	0.170333	-8.35798	6.38e-17	3.16e-15
SLAIN1	193.057	-1.42408	0.274353	-5.1907	2.1e-07	1.84e-06
DNM3OS	27.9702	-1.42455	0.485508	-2.93415	0.00334459	0.0108128
LOC101929140	35.9151	-1.42711	0.455197	-3.13514	0.0017177	0.00605125
CCP110	786.397	-1.42759	0.197718	-7.22033	5.19e-13	1.31e-11
BRMS1	467.06	-1.42806	0.212922	-6.70696	1.99e-11	3.88e-10
BOLL	12.6585	-1.42822	0.53618	-2.6637	0.00772873	0.0223429
IMPAD1	2516.91	-1.43167	0.188148	-7.60927	2.76e-14	8.56e-13
PRKRIR	2117.27	-1.4321	0.181795	-7.87753	3.34e-15	1.22e-13
CCDC22	43.0423	-1.43351	0.420389	-3.40995	0.000649737	0.00257016
KLHL15	236.717	-1.43484	0.258991	-5.54014	3.02e-08	3.13e-07
NUDT1	476.561	-1.43549	0.196734	-7.29658	2.95e-13	7.83e-12
RICTOR	1427.16	-1.43689	0.143294	-10.0275	1.15e-23	1.34e-21
PDE3B	30.9434	-1.43771	0.445303	-3.22862	0.00124388	0.00453876
LGR4	524.561	-1.43841	0.215478	-6.67544	2.46e-11	4.74e-10
NUP62CL	24.0383	-1.43854	0.446879	-3.21908	0.00128604	0.00468043
PHF6	2128.12	-1.44034	0.16498	-8.73041	2.54e-18	1.52e-16
OGN	41.8087	-1.44078	0.433275	-3.32532	0.000883186	0.00336648
GPR160	105.946	-1.44195	0.375866	-3.83634	0.000124879	0.000586578
TAF1D	2905.73	-1.442	0.176047	-8.19102	2.59e-16	1.14e-14
LINC00702	126.408	-1.4427	0.315261	-4.5762	4.73e-06	3.12e-05
VHL	2156.76	-1.44392	0.264451	-5.46006	4.76e-08	4.75e-07
DNASE2	333.892	-1.4443	0.283312	-5.09791	3.43e-07	2.89e-06
PRRT1	12.6199	-1.44756	0.549994	-2.63197	0.00848924	0.0242868
AP1AR	897.115	-1.44926	0.198942	-7.28483	3.22e-13	8.51e-12
NFYA	1219.57	-1.45003	0.168037	-8.62919	6.18e-18	3.49e-16
DSE	514.019	-1.45098	0.188798	-7.68534	1.53e-14	4.96e-13
SOWAHC	603.434	-1.45168	0.198229	-7.32327	2.42e-13	6.52e-12
PHACTR1	19.0761	-1.45256	0.465126	-3.12294	0.00179051	0.00626142
FAM126A	1043.25	-1.45352	0.171154	-8.49249	2.02e-17	1.07e-15
SDCBP	7912.21	-1.45563	0.172411	-8.44274	3.1e-17	1.59e-15
PTAR1	1597.69	-1.46098	0.163285	-8.94739	3.64e-19	2.35e-17
GPR126	386.641	-1.46167	0.238411	-6.13088	8.74e-10	1.23e-08
CCDC88B	18.8517	-1.46193	0.513055	-2.84946	0.00437933	0.013647
RAP2A	916.121	-1.4631	0.227334	-6.43591	1.23e-10	2.04e-09
PLS3-AS1	16.8618	-1.46453	0.547736	-2.67379	0.00750002	0.0217458
DENND2C	21.1139	-1.46504	0.472338	-3.10168	0.00192426	0.00666679
HOOK3	868.225	-1.46532	0.201722	-7.26408	3.76e-13	9.82e-12
RPS9	1036.72	-1.46566	0.186996	-7.83793	4.58e-15	1.61e-13
SLC18A2	700.014	-1.46747	0.179755	-8.16371	3.25e-16	1.39e-14
STK38L	690.123	-1.47043	0.244265	-6.01979	1.75e-09	2.33e-08
ZNF358	57.5412	-1.47176	0.386953	-3.80345	0.000142695	0.000660973
SP4	235.539	-1.47189	0.22403	-6.57005	5.03e-11	9.12e-10
PIK3CG	151.109	-1.47217	0.258922	-5.68577	1.3e-08	1.47e-07
MAGEC1	13.3853	-1.47378	0.558712	-2.63781	0.00834428	0.0239156
LINC00705	137.148	-1.47546	0.247082	-5.97153	2.35e-09	3.05e-08
JOSD2	21.6683	-1.47648	0.504624	-2.92591	0.00343452	0.0110716
PAPD5	672.713	-1.47709	0.186918	-7.90233	2.74e-15	1.02e-13
PAX9	13.1052	-1.4795	0.591806	-2.49997	0.0124205	0.0336526
PDCL	1124.26	-1.48014	0.169704	-8.72189	2.74e-18	1.63e-16
MLK7-AS1	66.862	-1.48202	0.39095	-3.79081	0.000150155	0.00069308
FAR1	2033.99	-1.48352	0.200962	-7.38211	1.56e-13	4.34e-12
ZNF154	169.61	-1.48582	0.265952	-5.58682	2.31e-08	2.46e-07
SLC26A4	16.1712	-1.48962	0.537403	-2.77188	0.00557335	0.0168239
MAP3K2	2022.78	-1.48989	0.163233	-9.12738	7.02e-20	5.03e-18
HIVEP2	400.369	-1.49026	0.228694	-6.51638	7.2e-11	1.26e-09
ST7-AS2	17.6332	-1.49096	0.459491	-3.24481	0.0011753	0.0043186
C18orf54	741.362	-1.49156	0.191135	-7.80368	6.01e-15	2.07e-13
MAST4	1381.93	-1.49358	0.169025	-8.8364	9.88e-19	6.16e-17
PELI1	469.286	-1.49468	0.224888	-6.64634	3e-11	5.71e-10
MYL6B	180.049	-1.49615	0.233085	-6.4189	1.37e-10	2.27e-09
HIPK3	805.423	-1.49674	0.179263	-8.34941	6.86e-17	3.37e-15
SLC4A7	1805.55	-1.49717	0.190749	-7.84886	4.2e-15	1.5e-13
MAGT1	1540.27	-1.49805	0.197583	-7.5819	3.41e-14	1.04e-12
WASF1	451.826	-1.49914	0.257158	-5.82966	5.55e-09	6.73e-08
SNCAIP	20.4827	-1.50177	0.496704	-3.02346	0.00249901	0.00838447
PTPRR	275.596	-1.50282	0.202445	-7.42337	1.14e-13	3.27e-12
TMEM65	418.975	-1.50287	0.215278	-6.98106	2.93e-12	6.56e-11
AAMDC	596.075	-1.50345	0.183278	-8.20308	2.34e-16	1.04e-14
FRMD6	4909.17	-1.50448	0.167328	-8.99118	2.45e-19	1.61e-17
IPO7	5030.36	-1.50672	0.16535	-9.11232	8.06e-20	5.73e-18
SNX16	519.353	-1.5072	0.19353	-7.78795	6.81e-15	2.33e-13
COL6A3	334.93	-1.50767	0.45988	-3.2784	0.00104396	0.0039017
[truncated: 341 more rows]

## Sheet: Lung_IP.v.MFP_IP_DEGs.in vivo
Official Gene Symbol	baseMean	log2FoldChange	lfcSE	stat	pvalue	padj
ID3	826.833	5.07187	0.251282	20.184	1.35e-90	5.55e-87
CSF3	50.6597	4.38212	0.442975	9.89248	4.49e-23	1.26e-21
EDN2	73.5814	4.31063	0.431107	9.99898	1.54e-23	4.54e-22
FPR1	33.3511	4.30787	0.515138	8.36256	6.14e-17	9.1e-16
CX3CL1	45.135	4.24134	0.476888	8.89378	5.91e-19	1.1e-17
FLVCR2	149.465	4.15098	0.281567	14.7424	3.44e-49	1.05e-46
GPRC5B	112.581	4.14718	0.332734	12.4639	1.17e-35	1.04e-33
TNFRSF1B	46.2099	3.95901	0.484587	8.16988	3.09e-16	4.27e-15
PITX1	829.568	3.80279	0.164266	23.1502	1.45e-118	1.19e-114
TSPAN8	164.843	3.79167	0.377128	10.0541	8.81e-24	2.66e-22
NR4A1	113.362	3.78326	0.344492	10.9821	4.66e-28	2.19e-26
DHRS3	179.497	3.74716	0.371388	10.0896	6.14e-24	1.89e-22
TTC39C	1788.38	3.74021	0.177802	21.0359	3.08e-98	1.69e-94
ZNHIT2	114.696	3.69409	0.343505	10.7541	5.67e-27	2.4e-25
ID1	1634.74	3.69027	0.19487	18.937	5.65e-80	8.43e-77
PWWP2B	84.3184	3.66766	0.346583	10.5823	3.6e-26	1.4e-24
JAG2	23.3156	3.63853	0.559976	6.49766	8.16e-11	6e-10
TPPP	21.0195	3.5873	0.554136	6.47368	9.56e-11	6.96e-10
MYO1F	97.2312	3.56206	0.344242	10.3475	4.29e-25	1.5e-23
AQP1	66.4136	3.52714	0.461621	7.64076	2.16e-14	2.46e-13
CSPG4	92.265	3.48037	0.409658	8.49579	1.97e-17	3.09e-16
SREBF1	831.148	3.47868	0.200118	17.3832	1.11e-67	1.14e-64
E2F2	395.9	3.45413	0.282224	12.239	1.92e-34	1.54e-32
ARTN	117.717	3.43167	0.335912	10.216	1.68e-24	5.54e-23
NFATC1	59.2287	3.41552	0.396975	8.60388	7.71e-18	1.26e-16
NME3	245.023	3.40308	0.246745	13.7919	2.85e-43	4.77e-41
RRAD	679.227	3.38028	0.228912	14.7667	2.4e-49	7.44e-47
MRPL53	1253.77	3.30797	0.212546	15.5635	1.29e-54	5.42e-52
COX7A2	9638.46	3.30116	0.169524	19.4731	1.86e-84	4.35e-81
FOSB	185.872	3.29983	0.280245	11.7748	5.26e-32	3.51e-30
UBE2S	5025.82	3.27547	0.166422	19.6817	3.1e-86	1.02e-82
C10orf54	108.217	3.26873	0.316437	10.3298	5.17e-25	1.8e-23
ADAP1	25.1526	3.22339	0.513943	6.27189	3.57e-10	2.43e-09
PNKD	1581.69	3.16994	0.167016	18.9799	2.5e-80	4.1e-77
SERPINB5	11.2275	3.1601	0.607445	5.20228	1.97e-07	9.27e-07
EMC9	859.442	3.15118	0.191856	16.4247	1.27e-60	8.35e-58
LINC01272	11.349	3.14406	0.592989	5.30206	1.15e-07	5.58e-07
BOK	269.706	3.14367	0.226389	13.8861	7.69e-44	1.36e-41
CD14	17.0704	3.13491	0.580326	5.40198	6.59e-08	3.31e-07
B3GNT8	56.7557	3.12208	0.489578	6.37708	1.8e-10	1.28e-09
FAM109B	63.6869	3.11995	0.384768	8.10865	5.12e-16	6.93e-15
PSD4	41.5979	3.09031	0.484432	6.37925	1.78e-10	1.26e-09
BIK	173.45	3.06743	0.516805	5.93538	2.93e-09	1.78e-08
DHH	22.9054	3.0445	0.531258	5.73073	1e-08	5.61e-08
DUSP2	58.9425	3.04416	0.414101	7.35125	1.96e-13	2e-12
KLF2	818.391	3.01659	0.184949	16.3104	8.33e-60	5.06e-57
LOC101926896	16.1758	2.99649	0.557305	5.37674	7.58e-08	3.78e-07
PIK3C2B	43.0002	2.99558	0.438078	6.838	8.03e-12	6.74e-11
BCAR1	477.851	2.96843	0.220988	13.4325	3.9e-41	5.52e-39
EHD1	1786.86	2.96151	0.186049	15.9179	4.76e-57	2.52e-54
H1FX-AS1	155.355	2.9433	0.266124	11.0599	1.96e-28	9.53e-27
RNF43	26.0038	2.94301	0.530606	5.54651	2.91e-08	1.53e-07
DVL1	435.865	2.91192	0.235223	12.3794	3.38e-35	2.89e-33
LSM7	1276.99	2.91011	0.186917	15.569	1.18e-54	5.1e-52
KLF16	125.25	2.90404	0.329854	8.80401	1.32e-18	2.33e-17
TPPP3	33.2366	2.89433	0.498001	5.8119	6.18e-09	3.57e-08
DAB2IP	395.257	2.88634	0.21004	13.7419	5.7e-43	9.45e-41
GNB1L	111.567	2.88073	0.400314	7.19618	6.19e-13	6e-12
TSPAN4	665.226	2.88062	0.286296	10.0617	8.16e-24	2.47e-22
SNN	35.7785	2.8788	0.492213	5.84868	4.95e-09	2.91e-08
LOC100862671	611.116	2.87551	0.183688	15.6543	3.1e-55	1.41e-52
ENTPD3-AS1	628.388	2.86874	0.25914	11.0702	1.75e-28	8.57e-27
TMEM86B	294.126	2.85075	0.277548	10.2712	9.5e-25	3.21e-23
CDKN1C	736.741	2.84801	0.171171	16.6384	3.67e-62	2.74e-59
A4GALT	60.8785	2.84781	0.35946	7.92248	2.33e-15	2.92e-14
SLC5A10	130.313	2.84345	0.332937	8.5405	1.34e-17	2.13e-16
SBF1	118.437	2.84223	0.298082	9.53506	1.5e-21	3.55e-20
STOML1	152.376	2.83334	0.294536	9.61967	6.6e-22	1.62e-20
FBXO44	23.7046	2.83076	0.512407	5.52444	3.31e-08	1.72e-07
LAMA4	59.6239	2.80131	0.36344	7.70776	1.28e-14	1.49e-13
ASAP3	120.02	2.79306	0.3972	7.03187	2.04e-12	1.85e-11
NUBP2	929.736	2.78977	0.214211	13.0235	9e-39	1.12e-36
TP53I13	601.924	2.78889	0.220081	12.6721	8.44e-37	8.35e-35
MIRLET7BHG	172.162	2.78813	0.269836	10.3327	5.01e-25	1.75e-23
SPSB3	376.142	2.78809	0.206033	13.5322	1.01e-41	1.51e-39
LOXL4	91.1078	2.78756	0.375508	7.42343	1.14e-13	1.19e-12
SOBP	129.482	2.78684	0.286588	9.72421	2.38e-22	6.12e-21
SPSB2	161.831	2.78593	0.25269	11.0251	2.89e-28	1.39e-26
PTPRN2	82.1194	2.78538	0.412044	6.7599	1.38e-11	1.12e-10
SPATS1	12.9065	2.78352	0.592131	4.70085	2.59e-06	1.05e-05
WNT4	39.9251	2.78122	0.486312	5.719	1.07e-08	5.99e-08
FAM110B	37.432	2.77213	0.460262	6.02293	1.71e-09	1.07e-08
NGEF	70.8747	2.76944	0.376501	7.35572	1.9e-13	1.94e-12
PUSL1	162.653	2.75971	0.242033	11.4022	4.08e-30	2.31e-28
PLXNB1	38.5645	2.74692	0.467922	5.87047	4.35e-09	2.57e-08
LOC729041	28.9697	2.73464	0.499314	5.47679	4.33e-08	2.22e-07
CAMKK1	197.624	2.72463	0.266769	10.2135	1.73e-24	5.68e-23
TMEM223	1086.11	2.71747	0.187107	14.5236	8.58e-48	2.13e-45
CD70	240.502	2.70923	0.496151	5.46049	4.75e-08	2.42e-07
HES6	31.0478	2.70217	0.492764	5.48369	4.17e-08	2.14e-07
CTU1	83.8288	2.69818	0.330503	8.16387	3.24e-16	4.48e-15
SIVA1	5049.21	2.69532	0.164658	16.3692	3.18e-60	2e-57
SBNO2	157.206	2.69512	0.295893	9.10844	8.36e-20	1.68e-18
MIEF2	132.265	2.69245	0.317623	8.47688	2.31e-17	3.61e-16
ANKRD9	125.545	2.68703	0.367053	7.32055	2.47e-13	2.49e-12
SAC3D1	494.989	2.68482	0.183119	14.6616	1.14e-48	3.27e-46
CHI3L2	18.2976	2.6725	0.592244	4.51249	6.41e-06	2.46e-05
INF2	832.717	2.65212	0.17323	15.3098	6.58e-53	2.45e-50
GCHFR	94.7342	2.6341	0.314944	8.36371	6.08e-17	9.02e-16
LPAR2	48.75	2.63196	0.400451	6.57249	4.95e-11	3.75e-10
UBTD1	269.774	2.63154	0.33347	7.8914	2.99e-15	3.7e-14
KRT8	1767.19	2.62943	0.207223	12.6889	6.81e-37	6.94e-35
CDH18	141	2.62252	0.33842	7.7493	9.24e-15	1.09e-13
ARFGAP1	911.045	2.60949	0.20693	12.6104	1.85e-36	1.76e-34
IFFO1	96.0679	2.60632	0.314208	8.29486	1.09e-16	1.57e-15
CYC1	5427.66	2.60055	0.239002	10.8808	1.42e-27	6.5e-26
TBC1D10A	209.217	2.60014	0.230781	11.2667	1.92e-29	1.04e-27
FAM229A	46.8339	2.59829	0.373596	6.95482	3.53e-12	3.1e-11
CEMIP	29.8789	2.59315	0.565303	4.58718	4.49e-06	1.77e-05
PPAP2C	1240.9	2.59184	0.156394	16.5725	1.1e-61	7.85e-59
NSUN5	398.283	2.58987	0.312371	8.291	1.12e-16	1.62e-15
AGER	164.685	2.58158	0.28216	9.14934	5.73e-20	1.18e-18
AGPAT2	464.683	2.57918	0.301374	8.55807	1.15e-17	1.85e-16
ZNF511	968.363	2.57755	0.179272	14.3778	7.13e-47	1.67e-44
URM1	1140.16	2.57361	0.190872	13.4834	1.96e-41	2.87e-39
PITPNM3	41.171	2.57127	0.392346	6.55357	5.62e-11	4.23e-10
TRIM47	495.816	2.57051	0.190945	13.462	2.62e-41	3.77e-39
TIMM17B	1462.12	2.56863	0.1801	14.2623	3.76e-46	8.34e-44
LOC101928137	13.3395	2.56542	0.591749	4.33532	1.46e-05	5.29e-05
PLEKHJ1	527.189	2.56428	0.22104	11.601	4.07e-31	2.56e-29
PPL	167.695	2.56159	0.31089	8.23952	1.73e-16	2.44e-15
CKB	844.779	2.56125	0.185582	13.8011	2.51e-43	4.24e-41
LOC339874	52.5276	2.56116	0.392148	6.5311	6.53e-11	4.86e-10
RHOT2	431.399	2.55563	0.240733	10.616	2.51e-26	9.97e-25
ANAPC11	6586.22	2.55057	0.130741	19.5086	9.27e-85	2.54e-81
PLXNB2	245.512	2.54424	0.217858	11.6784	1.64e-31	1.07e-29
CEBPD	195.741	2.54129	0.270859	9.38235	6.45e-21	1.45e-19
CLDN4	1340.08	2.53697	0.228849	11.0858	1.47e-28	7.29e-27
KRT17	20.4987	2.5348	0.549244	4.61507	3.93e-06	1.56e-05
MAPK12	57.3455	2.53473	0.389231	6.51215	7.41e-11	5.48e-10
SERPINF2	65.6329	2.53069	0.356204	7.10462	1.21e-12	1.13e-11
CHMP6	134.984	2.52094	0.368945	6.83282	8.33e-12	6.97e-11
ATP6V0B	12384.6	2.51393	0.157511	15.9604	2.41e-57	1.32e-54
VAMP8	9024.04	2.50945	0.156031	16.0831	3.35e-58	1.9e-55
PSMB3	11242.7	2.50944	0.146584	17.1194	1.06e-65	9.69e-63
NELFB	384.631	2.50816	0.205377	12.2125	2.67e-34	2.12e-32
EVA1C	373.86	2.50694	0.231671	10.8211	2.74e-27	1.2e-25
DHX30	1577.78	2.50478	0.199313	12.5671	3.2e-36	3e-34
MXD3	205.761	2.49495	0.262428	9.50716	1.96e-21	4.57e-20
NUDT16L1	1178.34	2.49243	0.195947	12.7199	4.59e-37	4.79e-35
DGKD	1088.93	2.4891	0.192284	12.9449	2.51e-38	2.99e-36
SLC3A2	2905.25	2.48769	0.199343	12.4795	9.66e-36	8.67e-34
PLK3	120.319	2.48162	0.291025	8.52718	1.5e-17	2.38e-16
RXRA	434.952	2.47041	0.249638	9.89597	4.33e-23	1.22e-21
CTDSP1	1167.32	2.46841	0.169381	14.5731	4.16e-48	1.08e-45
FOXA3	30.1471	2.46484	0.473094	5.21004	1.89e-07	8.93e-07
AP2A2	513.085	2.4648	0.243914	10.1052	5.24e-24	1.62e-22
RPP25	431.642	2.46041	0.241996	10.1671	2.78e-24	8.86e-23
SLC12A7	303.588	2.45992	0.238164	10.3287	5.23e-25	1.81e-23
ENTHD2	197.819	2.45643	0.248585	9.88163	5e-23	1.4e-21
PLA2G15	233.519	2.45094	0.241991	10.1282	4.14e-24	1.29e-22
TMEM222	805.903	2.45037	0.189305	12.9441	2.54e-38	3e-36
GDF15	98.2814	2.44991	0.378212	6.47761	9.32e-11	6.8e-10
C9orf89	4586.2	2.44516	0.189138	12.9279	3.13e-38	3.65e-36
LRFN4	70.0279	2.43955	0.343273	7.10675	1.19e-12	1.11e-11
SNHG8	1695.04	2.43883	0.207168	11.7722	5.43e-32	3.61e-30
B3GALT4	57.4958	2.43799	0.361126	6.75109	1.47e-11	1.19e-10
NEDD9	831.395	2.43762	0.14506	16.8042	2.27e-63	1.78e-60
ELF3	13.3295	2.43706	0.591698	4.11875	3.81e-05	0.000130476
ARFGAP2	577.665	2.43502	0.188192	12.939	2.71e-38	3.18e-36
STK32A	17.9048	2.43486	0.564189	4.31567	1.59e-05	5.75e-05
KRT19	3325.38	2.42596	0.191139	12.6921	6.54e-37	6.71e-35
CDC34	663.967	2.42429	0.210048	11.5416	8.14e-31	4.95e-29
COX8A	5313.21	2.42111	0.178663	13.5512	7.79e-42	1.18e-39
SDR16C5	481.509	2.41938	0.247478	9.77616	1.43e-22	3.79e-21
DUS3L	418.786	2.41713	0.19343	12.4962	7.84e-36	7.06e-34
ADAT3	32.3314	2.41663	0.449272	5.37901	7.49e-08	3.73e-07
LOC101927642	56.7914	2.41564	0.363902	6.63815	3.18e-11	2.47e-10
GUCY1B2	19.7882	2.41504	0.603021	4.0049	6.2e-05	0.00020502
RBM42	866.126	2.41315	0.224049	10.7706	4.74e-27	2.02e-25
KIAA0513	42.5117	2.40976	0.47117	5.11443	3.15e-07	1.44e-06
DNAJC27-AS1	58.7056	2.40965	0.408478	5.8991	3.65e-09	2.18e-08
BID	1356.08	2.40349	0.175435	13.7002	1.01e-42	1.63e-40
SLC25A11	1675.93	2.39777	0.201024	11.9278	8.48e-33	6.1e-31
NDOR1	243.718	2.39748	0.236817	10.1238	4.33e-24	1.35e-22
RRP8	524.047	2.39738	0.233732	10.257	1.1e-24	3.69e-23
VARS2	101.755	2.39394	0.339407	7.05332	1.75e-12	1.6e-11
CD96	680.484	2.39219	0.419819	5.69813	1.21e-08	6.71e-08
TFEB	24.9791	2.39023	0.515707	4.63486	3.57e-06	1.42e-05
ACSS1	45.8165	2.38788	0.432742	5.51802	3.43e-08	1.78e-07
SPEG	83.8599	2.38516	0.356305	6.69417	2.17e-11	1.72e-10
NXN	160.366	2.38358	0.271206	8.78883	1.51e-18	2.65e-17
RDH5	26.7486	2.37997	0.459606	5.17829	2.24e-07	1.05e-06
TMEM102	38.3148	2.37824	0.424781	5.59873	2.16e-08	1.16e-07
LSM10	1268.12	2.37813	0.17365	13.6949	1.09e-42	1.73e-40
USP35	34.9996	2.37624	0.46606	5.09857	3.42e-07	1.56e-06
MUTYH	290.233	2.37071	0.191912	12.3531	4.69e-35	3.95e-33
TMEM234	161.051	2.37039	0.291532	8.13081	4.26e-16	5.81e-15
DNLZ	227.759	2.36922	0.205766	11.5142	1.12e-30	6.65e-29
ICOSLG	30.0887	2.3676	0.455364	5.19936	2e-07	9.42e-07
LAMA5	1274.41	2.36669	0.150523	15.7231	1.05e-55	5.07e-53
MRPS12	1847.75	2.36557	0.140354	16.8543	9.75e-64	8e-61
TYRO3	79.5553	2.36521	0.341608	6.92376	4.4e-12	3.82e-11
TMSB10	29595.1	2.36346	0.204901	11.5346	8.83e-31	5.3e-29
RPL38	10542.4	2.36342	0.245711	9.61868	6.67e-22	1.64e-20
SDHAF1	106.223	2.36189	0.320237	7.37543	1.64e-13	1.68e-12
HOXD4	52.8057	2.35663	0.405313	5.81435	6.09e-09	3.52e-08
THRB	76.6113	2.35658	0.398441	5.91449	3.33e-09	2e-08
PIEZO1	783.965	2.35588	0.21203	11.1111	1.11e-28	5.65e-27
NAA38	1458.38	2.35242	0.203947	11.5345	8.84e-31	5.3e-29
SLC39A3	486.835	2.3492	0.172967	13.5818	5.14e-42	7.95e-40
MAD2L2	995.163	2.34917	0.220925	10.6334	2.08e-26	8.36e-25
SIX5	74.9421	2.34897	0.385783	6.08883	1.14e-09	7.26e-09
A1BG	53.4369	2.3486	0.420174	5.5896	2.28e-08	1.22e-07
RNH1	1141.77	2.34765	0.186427	12.5929	2.31e-36	2.18e-34
XRCC3	163.259	2.34508	0.292853	8.00771	1.17e-15	1.52e-14
TAF6L	369.316	2.34488	0.339476	6.90734	4.94e-12	4.26e-11
SLC9A2	23.8121	2.3442	0.527926	4.44039	8.98e-06	3.37e-05
LOC644656	61.578	2.34188	0.389072	6.01916	1.75e-09	1.1e-08
PPP2R4	618.565	2.34079	0.241471	9.6939	3.2e-22	8.14e-21
TUBB4B	5270.19	2.33966	0.269457	8.68286	3.86e-18	6.53e-17
HDAC11	98.0166	2.3394	0.361252	6.47582	9.43e-11	6.86e-10
PHLDA2	10880.7	2.33817	0.165333	14.1422	2.09e-45	4.07e-43
LINC01023	49.7633	2.3355	0.427208	5.46689	4.58e-08	2.34e-07
ITPK1	604.724	2.33226	0.243689	9.57066	1.06e-21	2.53e-20
CDT1	414.52	2.33199	0.196904	11.8433	2.33e-32	1.61e-30
FITM2	267.368	2.32999	0.220764	10.5542	4.86e-26	1.87e-24
LTK	10.2721	2.32769	0.607417	3.83212	0.000127043	0.000396573
RFNG	117.344	2.32521	0.292798	7.94134	2e-15	2.54e-14
NDST2	152.28	2.32221	0.301501	7.70218	1.34e-14	1.55e-13
ADAMTS15	67.0905	2.3219	0.416911	5.56929	2.56e-08	1.36e-07
FIBCD1	31.6548	2.31971	0.417383	5.55774	2.73e-08	1.44e-07
RGS12	199.387	2.31887	0.25319	9.15861	5.26e-20	1.09e-18
TNFRSF25	27.0136	2.31677	0.457595	5.06293	4.13e-07	1.86e-06
PPP1R35	286.36	2.31457	0.223064	10.3763	3.18e-25	1.12e-23
KREMEN1	33.1186	2.3139	0.528469	4.37849	1.2e-05	4.41e-05
TMEM53	475.148	2.31227	0.213576	10.8265	2.58e-27	1.13e-25
BAIAP2	465.628	2.31171	0.184132	12.5546	3.75e-36	3.48e-34
SIRT7	566.87	2.31155	0.208262	11.0992	1.27e-28	6.41e-27
CHMP1A	709.674	2.30656	0.209091	11.0314	2.7e-28	1.3e-26
EXOSC4	1042.95	2.30552	0.212864	10.831	2.46e-27	1.08e-25
LRRC75B	39.8768	2.30368	0.473602	4.86417	1.15e-06	4.9e-06
AURKAIP1	1762.3	2.30238	0.145604	15.8126	2.55e-56	1.27e-53
GEMIN7	1757.7	2.30234	0.163029	14.1223	2.77e-45	5.28e-43
BAIAP2L1	251.683	2.3009	0.25647	8.97142	2.93e-19	5.6e-18
EFNA2	10.4992	2.29844	0.601761	3.81953	0.000133709	0.000415718
BTBD6	441.682	2.29695	0.220354	10.4239	1.93e-25	6.99e-24
DOK4	29.8741	2.2962	0.479762	4.78612	1.7e-06	7.08e-06
RPS14	17211.4	2.29312	0.181721	12.6189	1.66e-36	1.61e-34
DPM3	115.739	2.2911	0.309283	7.40777	1.28e-13	1.33e-12
LINC00116	3028.89	2.2904	0.201698	11.3556	6.96e-30	3.9e-28
FOXD4	22.6921	2.28766	0.498349	4.59047	4.42e-06	1.74e-05
NDUFB11	1264.35	2.28613	0.184373	12.3994	2.63e-35	2.26e-33
FAU	3134.96	2.28445	0.176882	12.9151	3.7e-38	4.25e-36
ECHDC3	247.134	2.28432	0.287095	7.95665	1.77e-15	2.25e-14
CCDC28B	374.376	2.28164	0.205663	11.0941	1.34e-28	6.75e-27
TTC39A	15.9737	2.28089	0.572541	3.98381	6.78e-05	0.000222898
UBALD2	966.757	2.27874	0.257864	8.83698	9.83e-19	1.76e-17
RGS14	79.3008	2.27279	0.401989	5.65386	1.57e-08	8.58e-08
MYEOV2	3371.64	2.27169	0.386128	5.88327	4.02e-09	2.39e-08
KCNN4	1083.37	2.27021	0.256653	8.84545	9.12e-19	1.64e-17
TYSND1	300.449	2.26965	0.233542	9.7184	2.52e-22	6.46e-21
PGP	500.89	2.26769	0.177247	12.7939	1.77e-37	1.9e-35
PPP1R14B	7768.38	2.2659	0.118303	19.1533	9.08e-82	1.86e-78
CALHM2	384.251	2.26469	0.253669	8.92775	4.35e-19	8.19e-18
PQLC1	208.115	2.26454	0.227317	9.96208	2.23e-23	6.49e-22
FAM89B	672.065	2.26404	0.222777	10.1628	2.91e-24	9.19e-23
ST6GALNAC4	131.423	2.2637	0.310449	7.2917	3.06e-13	3.07e-12
SLC39A13	661.057	2.26127	0.173027	13.0688	4.96e-39	6.41e-37
R3HCC1	517.038	2.26032	0.247728	9.1242	7.23e-20	1.47e-18
MRPL36	2884.85	2.26005	0.161203	14.0199	1.18e-44	2.17e-42
SEMA3B	93.0368	2.2591	0.309437	7.30068	2.86e-13	2.88e-12
ASB6	692.149	2.25904	0.179937	12.5546	3.75e-36	3.48e-34
STK11	163.009	2.25633	0.274906	8.20764	2.26e-16	3.16e-15
RNF126	406.546	2.25465	0.232155	9.71185	2.68e-22	6.87e-21
LOC100127888	337.964	2.25432	0.217714	10.3545	3.99e-25	1.4e-23
RARG	207.434	2.25342	0.273114	8.25084	1.57e-16	2.23e-15
MRPL41	911.375	2.25135	0.201252	11.1867	4.74e-29	2.48e-27
SLC52A2	1633.47	2.25046	0.220672	10.1982	2.02e-24	6.59e-23
AK1	799.934	2.2484	0.14773	15.2197	2.62e-52	9.34e-50
YDJC	319.701	2.24815	0.283736	7.92338	2.31e-15	2.91e-14
PER1	176.191	2.24248	0.269734	8.31369	9.28e-17	1.35e-15
TSPAN1	285.474	2.2354	0.213286	10.4808	1.06e-25	3.97e-24
C8orf82	143.782	2.22796	0.25888	8.60616	7.56e-18	1.24e-16
SLIRP	5766.51	2.22786	0.228068	9.7684	1.54e-22	4.08e-21
TRPV4	25.7506	2.22595	0.514581	4.32576	1.52e-05	5.51e-05
SLC4A2	904.306	2.22572	0.168916	13.1765	1.2e-39	1.61e-37
FRAS1	136.062	2.22512	0.312646	7.11704	1.1e-12	1.04e-11
RPS8	12660.2	2.21951	0.169273	13.112	2.81e-39	3.66e-37
F12	19.3754	2.21808	0.504387	4.39758	1.09e-05	4.06e-05
SNHG12	273.002	2.21311	0.239045	9.25813	2.08e-20	4.5e-19
ABLIM2	34.5361	2.21191	0.462528	4.78222	1.73e-06	7.22e-06
NUDT14	143.054	2.21141	0.283798	7.79218	6.59e-15	7.89e-14
AP2S1	3007.7	2.20868	0.143378	15.4046	1.52e-53	5.96e-51
FAM20C	688.8	2.20773	0.212218	10.4031	2.4e-25	8.58e-24
MESP1	38.8891	2.20642	0.405256	5.44451	5.19e-08	2.64e-07
SH3TC1	13.121	2.20475	0.590975	3.73071	0.000190942	0.00057918
SP5	36.9975	2.20409	0.403693	5.45982	4.77e-08	2.43e-07
PTRHD1	1448.58	2.19906	0.154867	14.1997	9.2e-46	1.91e-43
BAMBI	321.768	2.19439	0.244777	8.96488	3.11e-19	5.92e-18
ARFRP1	514.779	2.19374	0.240863	9.10782	8.41e-20	1.69e-18
SMPD1	296.497	2.19324	0.273918	8.00695	1.18e-15	1.52e-14
MAP7D1	1663.47	2.19276	0.182735	11.9997	3.57e-33	2.58e-31
ZFAND2B	708.004	2.19135	0.210135	10.4283	1.84e-25	6.69e-24
NUDT22	344.029	2.18513	0.224834	9.71888	2.51e-22	6.44e-21
CD24	352.514	2.18463	0.237843	9.18518	4.11e-20	8.63e-19
KIF7	103.418	2.18435	0.365723	5.97269	2.33e-09	1.44e-08
LOC113230	103.627	2.18235	0.609617	3.57987	0.000343768	0.000997212
C9orf37	258.728	2.17848	0.237289	9.1807	4.28e-20	8.99e-19
KIF22	1410.96	2.17786	0.151257	14.3984	5.3e-47	1.26e-44
ABHD17A	143.86	2.17742	0.359212	6.06167	1.35e-09	8.52e-09
FLNC	104.084	2.17491	0.316127	6.87986	5.99e-12	5.12e-11
CABLES1	143.63	2.17133	0.294245	7.37933	1.59e-13	1.64e-12
C12orf57	1557.37	2.16837	0.189544	11.4399	2.64e-30	1.52e-28
UBL5	5713.61	2.16803	0.215657	10.0531	8.9e-24	2.69e-22
MED16	133.678	2.16713	0.28419	7.62563	2.43e-14	2.75e-13
MRPL37	3453.82	2.16638	0.203584	10.6412	1.92e-26	7.75e-25
NDUFC1	4929.04	2.16427	0.206981	10.4564	1.37e-25	5.04e-24
GPSM1	93.6038	2.16113	0.322894	6.69299	2.19e-11	1.73e-10
MYO3A	20.2913	2.15809	0.54901	3.93087	8.46e-05	0.000273946
COASY	854.934	2.15732	0.225117	9.58312	9.42e-22	2.27e-20
LRRC14	73.5336	2.15571	0.343304	6.2793	3.4e-10	2.32e-09
FUZ	15.3399	2.15391	0.531028	4.05611	4.99e-05	0.000167514
HSD3B7	572.714	2.15067	0.177138	12.1412	6.39e-34	4.87e-32
EMP3	31226	2.14997	0.130564	16.4669	6.35e-61	4.34e-58
FAM102A	272.023	2.14961	0.244606	8.78805	1.52e-18	2.66e-17
ST6GALNAC6	343.585	2.14928	0.235468	9.1277	7e-20	1.43e-18
TRABD	110.779	2.14755	0.353976	6.06695	1.3e-09	8.26e-09
PPAP2B	308.1	2.14705	0.204023	10.5236	6.73e-26	2.54e-24
HMG20B	696.283	2.14521	0.226584	9.46761	2.86e-21	6.62e-20
TMEM259	184.865	2.14491	0.246727	8.69343	3.52e-18	5.99e-17
CLUH	224.468	2.14307	0.314497	6.81426	9.48e-12	7.87e-11
MRPS15	1776.33	2.13496	0.194218	10.9926	4.15e-28	1.96e-26
CCDC57	219.431	2.13444	0.248804	8.57882	9.58e-18	1.56e-16
SNORD38B	26.0595	2.1342	0.474638	4.49647	6.91e-06	2.64e-05
LOC645166	1095.39	2.13374	0.1682	12.6857	7.09e-37	7.18e-35
LFNG	176.425	2.12888	0.31682	6.71952	1.82e-11	1.46e-10
FZR1	200.878	2.12878	0.25777	8.25844	1.48e-16	2.1e-15
MCM7	2854.96	2.12876	0.206622	10.3027	6.85e-25	2.35e-23
SEPW1	1583.32	2.1278	0.148952	14.2851	2.71e-46	6.26e-44
ZBTB7B	45.0293	2.1263	0.396762	5.35914	8.36e-08	4.13e-07
TRAF4	138.949	2.12575	0.280451	7.57975	3.46e-14	3.83e-13
DGKQ	63.2646	2.12257	0.345963	6.13525	8.5e-10	5.52e-09
IRF7	106.563	2.1215	0.294184	7.21147	5.54e-13	5.38e-12
PEX14	218.72	2.11861	0.281848	7.51685	5.61e-14	6.07e-13
DDAH2	2156.59	2.11666	0.203651	10.3935	2.65e-25	9.47e-24
ANXA11	1375.34	2.11642	0.183306	11.5459	7.75e-31	4.73e-29
NINJ2	117.573	2.11557	0.328134	6.44728	1.14e-10	8.22e-10
CCDC167	453.561	2.11535	0.231571	9.13476	6.56e-20	1.34e-18
SRA1	963.041	2.11451	0.212491	9.95107	2.49e-23	7.21e-22
PPP2R5B	109.2	2.11447	0.279368	7.56877	3.77e-14	4.16e-13
RPS6KA1	192.855	2.11386	0.282337	7.48701	7.05e-14	7.51e-13
TOR4A	903.639	2.11332	0.181407	11.6496	2.31e-31	1.48e-29
PPM1F	972.201	2.11313	0.197505	10.6991	1.03e-26	4.24e-25
SNAPC4	205.273	2.11194	0.248187	8.50949	1.75e-17	2.76e-16
LAIR2	19.1335	2.11144	0.601753	3.50881	0.000450114	0.00127637
COX6A1	26108	2.11071	0.148551	14.2086	8.1e-46	1.7e-43
MOB2	188.546	2.11049	0.261754	8.06289	7.45e-16	9.88e-15
DGKZ	134.21	2.10751	0.316558	6.65759	2.78e-11	2.18e-10
MRPL27	4516.04	2.10303	0.141875	14.8231	1.04e-49	3.28e-47
SPTB	246.951	2.10231	0.250015	8.40872	4.15e-17	6.29e-16
CHCHD5	362.624	2.10208	0.19365	10.8551	1.89e-27	8.46e-26
APOBEC3G	190.973	2.09969	0.370571	5.66611	1.46e-08	8e-08
C21orf58	262.795	2.0988	0.240294	8.7343	2.45e-18	4.22e-17
HTRA2	244.903	2.09631	0.283671	7.38994	1.47e-13	1.52e-12
LLGL2	36.3322	2.09623	0.405833	5.16524	2.4e-07	1.12e-06
SCAP	606.49	2.09562	0.244181	8.58227	9.3e-18	1.52e-16
FAM73B	182.827	2.09396	0.260964	8.02393	1.02e-15	1.33e-14
PLEKHO2	195.232	2.0923	0.235673	8.87798	6.81e-19	1.25e-17
RPS16	6572.29	2.08804	0.18118	11.5247	9.91e-31	5.91e-29
DPH2	631.249	2.08754	0.229521	9.09522	9.44e-20	1.89e-18
TCF7	45.5981	2.0871	0.446245	4.67702	2.91e-06	1.18e-05
GAS2L1	646.096	2.08641	0.184802	11.29	1.47e-29	8.1e-28
GINS2	1034.89	2.08556	0.206174	10.1155	4.71e-24	1.46e-22
ZDHHC12	538.921	2.08355	0.282953	7.36359	1.79e-13	1.83e-12
NR2C2AP	318.776	2.08339	0.258662	8.05449	7.98e-16	1.05e-14
FBXL15	165.843	2.08299	0.280429	7.42785	1.1e-13	1.16e-12
CARD10	440.22	2.08213	0.272622	7.63741	2.22e-14	2.52e-13
PCYT2	93.3358	2.08211	0.349208	5.96237	2.49e-09	1.52e-08
OGFOD2	380.713	2.08151	0.251164	8.28747	1.16e-16	1.67e-15
PYROXD2	178.827	2.08142	0.273517	7.60984	2.74e-14	3.08e-13
PRR34	11.5953	2.08105	0.56585	3.67775	0.000235304	0.000703598
HIST1H2AH	20.3075	2.08014	0.542244	3.83617	0.000124967	0.000390686
B3GNT7	284.036	2.07934	0.231661	8.97581	2.81e-19	5.39e-18
PSRC1	1067.5	2.07801	0.170211	12.2084	2.8e-34	2.21e-32
PIDD1	86.098	2.07794	0.32542	6.38542	1.71e-10	1.21e-09
LSM2	2761.12	2.07787	0.14268	14.5631	4.82e-48	1.24e-45
CERS4	13.1202	2.07783	0.583242	3.56255	0.000367265	0.00106106
PMM1	371.506	2.07655	0.179058	11.5971	4.26e-31	2.67e-29
SLC25A29	194.554	2.07439	0.258004	8.04015	8.97e-16	1.17e-14
ZG16B	72.157	2.07049	0.363058	5.70292	1.18e-08	6.53e-08
GLIS2	142.815	2.06969	0.235683	8.78168	1.61e-18	2.81e-17
STK11IP	412.009	2.06738	0.242028	8.5419	1.32e-17	2.11e-16
SF3B5	2593.19	2.0652	0.15823	13.0518	6.2e-39	7.89e-37
INTS5	248.723	2.06422	0.226982	9.0942	9.53e-20	1.9e-18
TLCD1	498.936	2.06414	0.212965	9.6924	3.25e-22	8.24e-21
DLK2	125.743	2.06273	0.286782	7.19269	6.35e-13	6.15e-12
CDK5	502.142	2.06174	0.261208	7.8931	2.95e-15	3.66e-14
RHBDL1	17.6404	2.06032	0.524941	3.92486	8.68e-05	0.000280378
TMEM229B	85.8519	2.05883	0.335718	6.13262	8.64e-10	5.6e-09
UAP1L1	166.553	2.05836	0.248731	8.27543	1.28e-16	1.84e-15
RCE1	706.83	2.05832	0.232509	8.85263	8.55e-19	1.54e-17
GFAP	30.5905	2.05636	0.459539	4.47484	7.65e-06	2.89e-05
ESRRA	80.8681	2.05588	0.341886	6.01336	1.82e-09	1.13e-08
TUBA1A	10610.4	2.054	0.206313	9.95572	2.38e-23	6.89e-22
MED22	219.839	2.05265	0.213487	9.61491	6.92e-22	1.69e-20
NFKBIE	362.274	2.05161	0.234913	8.73352	2.47e-18	4.24e-17
WRAP53	662.854	2.05106	0.189155	10.8433	2.15e-27	9.52e-26
TIGD5	36.986	2.04912	0.448814	4.56563	4.98e-06	1.95e-05
RHOD	38.6294	2.04909	0.422331	4.85187	1.22e-06	5.19e-06
MRPL21	3278.71	2.0477	0.157085	13.0357	7.67e-39	9.61e-37
CYP2J2	28.229	2.04668	0.481994	4.24628	2.17e-05	7.71e-05
LRRC66	13.6249	2.04524	0.594802	3.43853	0.000584885	0.00162595
EPHB4	309.879	2.04511	0.207788	9.84231	7.4e-23	2.04e-21
IDH1-AS1	50.074	2.04505	0.364033	5.61776	1.93e-08	1.05e-07
PYGB	2515.45	2.04445	0.185661	11.0117	3.36e-28	1.6e-26
BAK1	415.273	2.0408	0.248685	8.20639	2.28e-16	3.19e-15
SNHG9	64.9706	2.03987	0.369168	5.5256	3.28e-08	1.71e-07
RPL24	5896.86	2.0387	0.220567	9.24301	2.4e-20	5.16e-19
PIM3	673.086	2.03821	0.236613	8.61409	7.05e-18	1.16e-16
ADPRHL2	1259.75	2.03673	0.22851	8.9131	4.96e-19	9.3e-18
ZNF415	60.848	2.03593	0.37821	5.38308	7.32e-08	3.65e-07
FRMPD3	11.4167	2.03534	0.607511	3.35029	0.000807276	0.00219192
LINC00176	22.2254	2.03479	0.496139	4.10126	4.11e-05	0.000140072
NDUFA11	2073.54	2.03416	0.179538	11.33	9.32e-30	5.2e-28
TMA7	8014.63	2.03399	0.221304	9.1909	3.9e-20	8.22e-19
C16orf91	1090.85	2.03355	0.15383	13.2194	6.78e-40	9.19e-38
TMEM54	468.453	2.03243	0.247322	8.21775	2.07e-16	2.92e-15
TEX264	987.224	2.03098	0.205165	9.89929	4.19e-23	1.19e-21
LIME1	91.9326	2.03059	0.293516	6.91816	4.58e-12	3.97e-11
DDX39A	6684.56	2.02967	0.193706	10.4781	1.09e-25	4.05e-24
PLXNA1	1909.6	2.02961	0.165743	12.2455	1.78e-34	1.44e-32
DTYMK	2457.81	2.0291	0.160628	12.6323	1.4e-36	1.37e-34
PPCDC	270.986	2.02826	0.263539	7.69625	1.4e-14	1.62e-13
TP73	36.7129	2.02771	0.415822	4.8764	1.08e-06	4.62e-06
PSMB1	15999.6	2.02589	0.134853	15.023	5.19e-51	1.7e-48
ATF3	78.8566	2.0247	0.317867	6.36965	1.89e-10	1.34e-09
CAPN10	80.7254	2.02406	0.382296	5.29449	1.19e-07	5.8e-07
RGCC	3806.23	2.02329	0.2426	8.34003	7.43e-17	1.09e-15
ZNF408	127.837	2.02317	0.294974	6.85879	6.94e-12	5.88e-11
C11orf83	601.832	2.02092	0.180482	11.1973	4.2e-29	2.21e-27
RECQL4	300.568	2.02047	0.176893	11.422	3.25e-30	1.86e-28
NOP14-AS1	45.946	2.0197	0.410998	4.91413	8.92e-07	3.85e-06
SPDEF	84.2572	2.01838	0.291523	6.92356	4.4e-12	3.83e-11
DNAJB2	173.644	2.01788	0.337802	5.97355	2.32e-09	1.43e-08
XKR8	259.229	2.01782	0.22964	8.78686	1.54e-18	2.69e-17
COA3	5453.05	2.01664	0.138254	14.5865	3.42e-48	9.06e-46
UBB	14968	2.01477	0.169989	11.8523	2.09e-32	1.46e-30
TXN2	3245.07	2.01408	0.218947	9.19896	3.61e-20	7.64e-19
BAD	811.634	2.01285	0.163784	12.2897	1.03e-34	8.44e-33
SPOCD1	27.6693	2.01104	0.47595	4.22531	2.39e-05	8.43e-05
VPS37D	15.0334	2.0101	0.540206	3.72099	0.00019844	0.000600368
ZBTB17	146.38	2.00981	0.3465	5.80032	6.62e-09	3.81e-08
RPP25L	368.787	2.00863	0.178379	11.2605	2.06e-29	1.11e-27
ISM1	46.6061	2.00774	0.453561	4.42661	9.57e-06	3.58e-05
TFAP2E	30.6022	2.00695	0.418194	4.79908	1.59e-06	6.66e-06
C11orf31	1907.79	2.00467	0.156486	12.8105	1.43e-37	1.56e-35
UCN	58.9498	2.00457	0.360043	5.56759	2.58e-08	1.37e-07
TNK2	243.446	2.00352	0.276318	7.25076	4.14e-13	4.09e-12
CDC20	4374.07	2.00059	0.213865	9.35446	8.4e-21	1.87e-19
LOC643733	15.9474	2.0004	0.589981	3.39062	0.000697359	0.00191494
ARAP1	436.084	1.99988	0.244575	8.17694	2.91e-16	4.03e-15
PANK4	275.155	1.99936	0.216853	9.21988	2.97e-20	6.34e-19
WDR18	264.547	1.99904	0.315217	6.34181	2.27e-10	1.59e-09
GTF3C5	557.828	1.99792	0.194391	10.2778	8.87e-25	3.01e-23
BAP1	1036.88	1.99739	0.160362	12.4555	1.31e-35	1.15e-33
TNFRSF12A	6306.37	1.99704	0.215211	9.27942	1.7e-20	3.73e-19
VPS18	250.844	1.99695	0.284892	7.00948	2.39e-12	2.14e-11
POP7	1374.55	1.9965	0.158226	12.6181	1.68e-36	1.62e-34
LRWD1	70.1838	1.99481	0.35874	5.56062	2.69e-08	1.42e-07
CEP170B	83.9046	1.99416	0.29406	6.78146	1.19e-11	9.76e-11
ATP5J2	425.617	1.99213	0.192487	10.3494	4.21e-25	1.48e-23
HCP5	20.1081	1.99105	0.582235	3.41967	0.000626966	0.0017347
CNPPD1	1073.54	1.98977	0.182549	10.8999	1.15e-27	5.3e-26
PGAP3	157.663	1.98954	0.262769	7.57145	3.69e-14	4.08e-13
ARHGAP27	413.564	1.98935	0.20483	9.71219	2.68e-22	6.86e-21
RHOB	1158.07	1.98894	0.212015	9.38111	6.53e-21	1.47e-19
UPF1	1176.36	1.98727	0.196177	10.13	4.07e-24	1.27e-22
OR7E14P	47.882	1.98642	0.42045	4.7245	2.31e-06	9.44e-06
FSIP2	304.248	1.98571	0.205845	9.64661	5.08e-22	1.27e-20
TIMM50	2225.94	1.98538	0.212722	9.33325	1.03e-20	2.28e-19
CAPN10-AS1	105.02	1.98501	0.312536	6.3513	2.13e-10	1.49e-09
APBB1	125.122	1.98372	0.310652	6.38565	1.71e-10	1.21e-09
HELZ2	69.0058	1.97979	0.340582	5.81296	6.14e-09	3.55e-08
LINC00648	138.283	1.97949	0.270293	7.32349	2.42e-13	2.44e-12
RPL13A	2833.8	1.9791	0.225396	8.78055	1.63e-18	2.83e-17
PDRG1	1287.38	1.97809	0.165928	11.9214	9.16e-33	6.53e-31
DPYSL3	246.907	1.97713	0.21114	9.36408	7.67e-21	1.72e-19
PHRF1	363.522	1.9769	0.206009	9.59617	8.3e-22	2.01e-20
BRF2	90.9844	1.96988	0.38676	5.09329	3.52e-07	1.6e-06
PEX16	324.027	1.96986	0.2224	8.8573	8.2e-19	1.49e-17
APOPT1	2175.47	1.96587	0.13828	14.2166	7.22e-46	1.54e-43
TMEM203	1761.04	1.96522	0.205248	9.57482	1.02e-21	2.44e-20
FAM129B	1641.87	1.96243	0.201607	9.73393	2.16e-22	5.61e-21
KRTCAP3	25.8137	1.96154	0.507968	3.86154	0.000112673	0.000355979
RPL18	7896.15	1.96149	0.150449	13.0376	7.48e-39	9.44e-37
CCDC17	48.4632	1.95943	0.474604	4.12856	3.65e-05	0.000125346
RPS29	3658.59	1.95929	0.247079	7.9298	2.2e-15	2.77e-14
ENTPD6	610.619	1.95696	0.192021	10.1914	2.17e-24	7.05e-23
RXRB	445.78	1.9565	0.18274	10.7065	9.49e-27	3.94e-25
PRKCZ	15.2152	1.95526	0.597749	3.27105	0.00107151	0.00284613
GFER	158.7	1.955	0.296158	6.60123	4.08e-11	3.13e-10
C16orf74	122.175	1.95428	0.285981	6.83361	8.28e-12	6.94e-11
EMILIN2	195.339	1.95366	0.266669	7.32616	2.37e-13	2.4e-12
ANAPC2	544.75	1.95004	0.220979	8.82452	1.1e-18	1.96e-17
PKD1	255.041	1.94986	0.212202	9.18872	3.98e-20	8.37e-19
UFD1L	2845.79	1.94846	0.150852	12.9164	3.64e-38	4.2e-36
PC	225.861	1.94813	0.258921	7.52405	5.31e-14	5.75e-13
PKMYT1	175.189	1.9481	0.371576	5.24281	1.58e-07	7.55e-07
SUV39H1	341.307	1.94335	0.249118	7.80092	6.15e-15	7.4e-14
PKN3	181.289	1.94251	0.232943	8.339	7.49e-17	1.1e-15
BCAT2	455.533	1.94245	0.176672	10.9946	4.06e-28	1.92e-26
ARMC6	780.736	1.94226	0.167178	11.6179	3.34e-31	2.11e-29
TELO2	103.27	1.94213	0.311963	6.22552	4.8e-10	3.22e-09
RPL27	8676.12	1.93931	0.186685	10.3882	2.81e-25	9.99e-24
POMGNT2	183.287	1.93885	0.290306	6.67865	2.41e-11	1.9e-10
DCDC2B	27.4541	1.9387	0.487825	3.97418	7.06e-05	0.00023123
NDUFB1	2868.29	1.93797	0.227948	8.5018	1.87e-17	2.94e-16
CACFD1	239.756	1.93789	0.219254	8.8386	9.69e-19	1.74e-17
COX6B1	4154.62	1.93775	0.171801	11.2791	1.67e-29	9.08e-28
DNAH2	82.0746	1.93741	0.334178	5.79754	6.73e-09	3.87e-08
TWF2	828.616	1.93722	0.238804	8.11217	4.97e-16	6.74e-15
SH2B1	114.585	1.9371	0.283694	6.82812	8.6e-12	7.19e-11
E4F1	76.9404	1.93708	0.33625	5.76083	8.37e-09	4.74e-08
TOE1	409.461	1.93589	0.21566	8.9766	2.79e-19	5.36e-18
DTX2	270.916	1.93503	0.21107	9.16776	4.83e-20	1e-18
SIPA1	165.64	1.93393	0.228549	8.46179	2.63e-17	4.1e-16
RIPK4	512.001	1.93348	0.23497	8.22862	1.89e-16	2.67e-15
TK1	2205.68	1.9333	0.191625	10.089	6.18e-24	1.9e-22
POLR2I	2354.32	1.93265	0.182801	10.5724	4e-26	1.55e-24
LMNA	4357.72	1.93233	0.213343	9.05739	1.34e-19	2.63e-18
CTU2	83.3953	1.93184	0.342952	5.63298	1.77e-08	9.62e-08
SETD1A	358.16	1.93171	0.247074	7.81838	5.35e-15	6.48e-14
OXLD1	99.6565	1.93134	0.309334	6.24355	4.28e-10	2.89e-09
BCR	209	1.92875	0.290519	6.63897	3.16e-11	2.46e-10
FAM46B	44.1758	1.92752	0.472767	4.07709	4.56e-05	0.000154232
FAM160B2	154.244	1.92476	0.244382	7.87604	3.38e-15	4.16e-14
RAB34	2431.68	1.92243	0.134601	14.2824	2.82e-46	6.42e-44
CCBL1	242.159	1.92186	0.269592	7.12878	1.01e-12	9.56e-12
COQ4	784.154	1.92054	0.22332	8.59995	7.97e-18	1.31e-16
PITPNA-AS1	90.9349	1.92037	0.293437	6.5444	5.97e-11	4.47e-10
RAB40C	193.902	1.92034	0.251451	7.63704	2.22e-14	2.53e-13
TSPAN9	150.706	1.92009	0.254643	7.54031	4.69e-14	5.11e-13
NDUFA6	2899.86	1.91984	0.168785	11.3745	5.6e-30	3.16e-28
SSNA1	613.978	1.91938	0.195187	9.83355	8.07e-23	2.21e-21
ACOX3	101.223	1.91809	0.293467	6.53597	6.32e-11	4.72e-10
MPG	386.221	1.91776	0.240137	7.98611	1.39e-15	1.79e-14
CD97	4117.49	1.91654	0.203058	9.43836	3.79e-21	8.63e-20
HTR1F	166.526	1.91595	0.29576	6.47806	9.29e-11	6.78e-10
TAF10	530.444	1.91443	0.188302	10.1668	2.79e-24	8.87e-23
ATF4	5025.47	1.91383	0.175948	10.8772	1.48e-27	6.75e-26
DAGLA	64.4329	1.91243	0.339549	5.63227	1.78e-08	9.66e-08
PCGF1	1997.31	1.91221	0.212203	9.01124	2.04e-19	3.95e-18
WDR81	271.616	1.91185	0.209431	9.12876	6.93e-20	1.42e-18
MISP	29.7021	1.91007	0.457231	4.17748	2.95e-05	0.000102784
MCAT	413.867	1.9098	0.254455	7.50547	6.12e-14	6.59e-13
ZNF668	78.9019	1.90874	0.320077	5.96337	2.47e-09	1.51e-08
SGTA	562.782	1.90817	0.199584	9.56076	1.17e-21	2.78e-20
UBXN6	258.526	1.90661	0.27115	7.03159	2.04e-12	1.85e-11
RNF181	4332.4	1.90572	0.140706	13.544	8.6e-42	1.29e-39
SNX21	553.753	1.90522	0.190562	9.99789	1.56e-23	4.59e-22
PI4KB	585.39	1.90334	0.254201	7.48754	7.02e-14	7.49e-13
TSC22D4	129.124	1.90329	0.287343	6.62375	3.5e-11	2.71e-10
ITGB1BP1	5549.22	1.90306	0.149797	12.7043	5.6e-37	5.78e-35
MRPS18C	1195.94	1.90272	0.226515	8.39996	4.47e-17	6.74e-16
TRPC4AP	1024.26	1.90012	0.202779	9.37037	7.23e-21	1.62e-19
MRPL38	564.827	1.89731	0.227118	8.35383	6.61e-17	9.75e-16
GADD45B	661.193	1.89603	0.148924	12.7315	3.95e-37	4.15e-35
KIAA1522	470.078	1.89561	0.203608	9.31009	1.28e-20	2.83e-19
DHRS13	119.709	1.89539	0.343464	5.51847	3.42e-08	1.78e-07
RGS3	1006.64	1.89533	0.160252	11.8272	2.83e-32	1.93e-30
SCRIB	345.113	1.89296	0.264322	7.16158	7.98e-13	7.64e-12
ZNF598	216.795	1.89296	0.229663	8.24232	1.69e-16	2.39e-15
HPS6	335.542	1.89276	0.205485	9.21117	3.23e-20	6.85e-19
PLEKHM2	205.308	1.89261	0.213926	8.84703	8.99e-19	1.62e-17
MRPL57	3890.09	1.88904	0.159656	11.8319	2.67e-32	1.83e-30
MYL6	22707.2	1.88897	0.148052	12.7589	2.78e-37	2.96e-35
PHF19	1215.59	1.88793	0.154624	12.2098	2.75e-34	2.18e-32
AXIN1	181.167	1.88747	0.235739	8.00662	1.18e-15	1.53e-14
UQCR10	7630.96	1.88496	0.205509	9.17215	4.64e-20	9.67e-19
C17orf70	60.0465	1.88409	0.413088	4.561	5.09e-06	1.99e-05
CINP	725.357	1.88376	0.161422	11.6698	1.82e-31	1.17e-29
RPL37A	7371.97	1.8836	0.387603	4.85961	1.18e-06	5.01e-06
TCF3	746.712	1.88315	0.183437	10.2659	1e-24	3.38e-23
MANEAL	364.674	1.88292	0.216853	8.68292	3.86e-18	6.53e-17
MAPKAPK3	930.959	1.88124	0.186835	10.0689	7.58e-24	2.31e-22
HYAL2	853.284	1.88108	0.216248	8.69871	3.36e-18	5.72e-17
RARRES3	248.648	1.88035	0.210447	8.93502	4.07e-19	7.69e-18
HDLBP	1970.49	1.88013	0.140519	13.3799	7.93e-41	1.11e-38
MRC2	211.429	1.87889	0.231925	8.1013	5.44e-16	7.33e-15
MLPH	1242.26	1.87734	0.15444	12.1558	5.34e-34	4.1e-32
TERT	13.7159	1.8764	0.591018	3.17486	0.00149909	0.00388074
METTL12	29.1812	1.87599	0.463551	4.04699	5.19e-05	0.000173856
PLEKHO1	82.0662	1.87541	0.286349	6.54939	5.78e-11	4.34e-10
PXMP2	486.998	1.87492	0.186658	10.0447	9.69e-24	2.91e-22
FPGS	657.321	1.87453	0.194509	9.63726	5.57e-22	1.38e-20
TRABD2A	134.392	1.87397	0.305282	6.13847	8.33e-10	5.41e-09
ABTB1	134.364	1.87076	0.283453	6.59989	4.11e-11	3.16e-10
FBXW5	260.751	1.87064	0.244561	7.64895	2.03e-14	2.32e-13
NCS1	116.892	1.87056	0.283934	6.58802	4.46e-11	3.4e-10
LOC654342	3078.82	1.86856	0.150448	12.42	2.04e-35	1.78e-33
SPNS1	286.981	1.86851	0.209204	8.9315	4.2e-19	7.93e-18
TMEM134	453.32	1.86819	0.179952	10.3816	3.01e-25	1.07e-23
NRDE2	837.47	1.86774	0.209578	8.91191	5.02e-19	9.39e-18
NT5C	673.737	1.86754	0.216759	8.61573	6.95e-18	1.15e-16
ADCK2	60.7523	1.86743	0.346795	5.38482	7.25e-08	3.62e-07
C6orf1	2722.96	1.86742	0.192924	9.67958	3.68e-22	9.3e-21
FAM179A	72.2083	1.86678	0.343161	5.43995	5.33e-08	2.7e-07
C15orf39	198.627	1.86676	0.270352	6.90491	5.02e-12	4.34e-11
AMT	82.3239	1.86449	0.405781	4.59482	4.33e-06	1.71e-05
EIF2B3	972.593	1.8636	0.1898	9.81875	9.35e-23	2.55e-21
U2AF1L4	393.174	1.86343	0.209034	8.91445	4.9e-19	9.19e-18
ZDHHC18	180.568	1.86198	0.257215	7.23899	4.52e-13	4.45e-12
TMEM18	4545.46	1.86163	0.158086	11.7761	5.19e-32	3.49e-30
GNA15	182.157	1.86148	0.294908	6.31207	2.75e-10	1.91e-09
CXXC1	283.816	1.8609	0.194321	9.57643	1e-21	2.41e-20
NPFF	95.4727	1.8599	0.365619	5.08698	3.64e-07	1.66e-06
DDR1	315.484	1.85931	0.259976	7.15187	8.56e-13	8.16e-12
MRPL55	1122.46	1.85915	0.148195	12.5453	4.22e-36	3.85e-34
CBX8	69.3936	1.85451	0.327287	5.66632	1.46e-08	8e-08
LOC101929657	26.7706	1.85423	0.580178	3.19596	0.00139365	0.00363012
SLC37A2	169.337	1.85104	0.246461	7.51047	5.89e-14	6.35e-13
PHPT1	1581.68	1.85045	0.14676	12.6087	1.89e-36	1.79e-34
UQCRQ	3157.97	1.84876	0.176937	10.4487	1.49e-25	5.45e-24
SNHG7	558.51	1.84876	0.170179	10.8636	1.72e-27	7.72e-26
DPH7	468.186	1.84723	0.190873	9.67775	3.75e-22	9.43e-21
CCDC127	999.097	1.84642	0.171149	10.7884	3.91e-27	1.69e-25
PLCD3	541.808	1.84464	0.183944	10.0282	1.15e-23	3.42e-22
GRM3	32.0412	1.84368	0.523507	3.52178	0.000428659	0.00121975
LOC102723320	26.8575	1.84348	0.480142	3.83945	0.00012331	0.000386242
SGK223	264.148	1.84244	0.24256	7.5958	3.06e-14	3.4e-13
PTPMT1	1551.71	1.84182	0.131293	14.0283	1.05e-44	1.95e-42
ADPRHL1	97.2389	1.84173	0.322975	5.70239	1.18e-08	6.55e-08
NEBL	68.0956	1.84155	0.380131	4.84451	1.27e-06	5.37e-06
PTGES2	338.936	1.84066	0.260877	7.05565	1.72e-12	1.58e-11
GIPC1	663.025	1.83923	0.200175	9.18809	4e-20	8.41e-19
CPT1A	246.906	1.83829	0.277672	6.62038	3.58e-11	2.77e-10
ANKRD39	343.166	1.83794	0.188368	9.75717	1.72e-22	4.53e-21
TSACC	111.216	1.83687	0.271377	6.76869	1.3e-11	1.06e-10
CXXC5	339.621	1.83614	0.213283	8.60892	7.38e-18	1.21e-16
GPANK1	355.763	1.83609	0.195096	9.4112	4.9e-21	1.11e-19
LTBP3	117.867	1.83349	0.330197	5.55271	2.81e-08	1.48e-07
ILK	2117.69	1.83283	0.283181	6.4723	9.65e-11	7.01e-10
CYB561D1	172.185	1.83268	0.28202	6.49842	8.12e-11	5.97e-10
CAPN1	522.175	1.83183	0.172752	10.6038	2.86e-26	1.12e-24
GNB2	516.313	1.83129	0.212621	8.61293	7.12e-18	1.17e-16
GDPD3	23.3052	1.83065	0.491991	3.72091	0.000198505	0.000600456
HIP1R	168.072	1.83053	0.259646	7.05008	1.79e-12	1.63e-11
ATG2A	114.419	1.82932	0.300463	6.08832	1.14e-09	7.28e-09
REM2	28.2971	1.82911	0.448678	4.07667	4.57e-05	0.000154447
NEURL4	170.829	1.82885	0.24135	7.57759	3.52e-14	3.89e-13
BAG6	2010.82	1.82872	0.169292	10.8022	3.36e-27	1.47e-25
PPP1R36	27.6224	1.82845	0.468208	3.90522	9.41e-05	0.000302259
EXOC3	416.596	1.82562	0.252856	7.21999	5.2e-13	5.08e-12
ACAP3	53.2491	1.82475	0.345575	5.28033	1.29e-07	6.23e-07
PSMB8	2116.96	1.82373	0.150692	12.1024	1.03e-33	7.76e-32
RPS6KA4	111.345	1.82234	0.29927	6.08928	1.13e-09	7.25e-09
ERI3	630.757	1.81975	0.298158	6.10331	1.04e-09	6.68e-09
RAB32	2037.25	1.81934	0.149416	12.1764	4.15e-34	3.23e-32
PPP1R16A	119.687	1.81842	0.335999	5.41198	6.23e-08	3.14e-07
CHST6	19.9532	1.81703	0.56784	3.1999	0.00137475	0.0035843
S100A4	10847.1	1.81701	0.164231	11.0637	1.88e-28	9.19e-27
ILVBL	733.058	1.81674	0.181496	10.0098	1.38e-23	4.09e-22
ADM5	53.1405	1.81656	0.419573	4.32954	1.49e-05	5.43e-05
MGAT4B	1203.73	1.81574	0.162649	11.1635	6.15e-29	3.16e-27
MRPS18A	1335.4	1.81514	0.170556	10.6425	1.89e-26	7.68e-25
KHDC1L	22.1864	1.81455	0.475156	3.81885	0.000134075	0.000416663
VARS	514.753	1.81436	0.211909	8.56197	1.11e-17	1.79e-16
SLC35E4	132.085	1.81416	0.292925	6.19326	5.89e-10	3.91e-09
PARD6A	99.4782	1.8141	0.395087	4.59164	4.4e-06	1.73e-05
NAGK	824.448	1.81171	0.227155	7.97563	1.52e-15	1.94e-14
PSKH1	55.9781	1.81088	0.393567	4.6012	4.2e-06	1.66e-05
MPST	202.893	1.81035	0.265998	6.80587	1e-11	8.32e-11
DXO	310.146	1.81026	0.2263	7.9994	1.25e-15	1.61e-14
ECSIT	415.893	1.80973	0.253657	7.13457	9.71e-13	9.18e-12
NMB	51.1722	1.80833	0.394972	4.57838	4.69e-06	1.84e-05
CYHR1	623.778	1.80821	0.215629	8.38574	5.04e-17	7.57e-16
STK40	778.475	1.80778	0.166351	10.8673	1.65e-27	7.46e-26
FAM96B	3037.78	1.80642	0.127809	14.1338	2.35e-45	4.54e-43
CSTF3-AS1	194.234	1.80469	0.268513	6.72106	1.8e-11	1.44e-10
ETV4	928.946	1.80317	0.188068	9.58786	8.99e-22	2.17e-20
SNRPB	5814.56	1.80306	0.127423	14.1502	1.86e-45	3.73e-43
TRIM28	2879.55	1.80275	0.14596	12.3509	4.81e-35	4.01e-33
MED27	1030.42	1.80205	0.226969	7.93962	2.03e-15	2.57e-14
UQCR11	1931.95	1.80112	0.182132	9.88908	4.64e-23	1.3e-21
ICT1	1325.95	1.80016	0.182975	9.83827	7.7e-23	2.12e-21
BMP4	3488.41	1.79984	0.213069	8.4472	2.98e-17	4.59e-16
H2AFX	813.743	1.79767	0.17673	10.1719	2.65e-24	8.49e-23
MVK	147.18	1.79744	0.243272	7.38862	1.48e-13	1.53e-12
LOC100499489	31.9275	1.79689	0.446233	4.02679	5.65e-05	0.000188058
ARHGAP25	15.7954	1.79659	0.582495	3.0843	0.0020403	0.00515634
PIF1	229.784	1.79646	0.216914	8.28191	1.21e-16	1.74e-15
PLEKHH3	90.9597	1.79584	0.330313	5.43679	5.42e-08	2.75e-07
METRNL	66.5262	1.79547	0.355297	5.05344	4.34e-07	1.95e-06
SLC27A4	372.596	1.79524	0.206113	8.70997	3.04e-18	5.19e-17
COMMD7	3081.37	1.79471	0.203128	8.83535	9.98e-19	1.78e-17
DRG2	488.592	1.79461	0.243674	7.3648	1.77e-13	1.82e-12
ZNF692	178.644	1.79365	0.276221	6.49351	8.39e-11	6.15e-10
RASD1	39.6287	1.7931	0.408117	4.39359	1.11e-05	4.13e-05
SNAP47	326.991	1.7929	0.19227	9.32494	1.11e-20	2.47e-19
TRIP6	542.526	1.79195	0.161498	11.0958	1.31e-28	6.64e-27
GLYCTK	165.922	1.79156	0.265862	6.73869	1.6e-11	1.29e-10
PRRX1	162.682	1.79136	0.288306	6.21341	5.18e-10	3.47e-09
KHDC1	222.029	1.79067	0.229403	7.80576	5.91e-15	7.14e-14
SAP25	17.0407	1.78925	0.531223	3.36817	0.000756683	0.00206505
FXR2	272.952	1.789	0.21547	8.30278	1.02e-16	1.48e-15
ABCB9	353.274	1.78827	0.242414	7.37691	1.62e-13	1.67e-12
EIF6	8763.62	1.78781	0.161235	11.0882	1.43e-28	7.14e-27
ECE1	773.014	1.78661	0.19478	9.17245	4.62e-20	9.65e-19
GET4	727.335	1.78656	0.234087	7.63206	2.31e-14	2.62e-13
CUTA	6942.6	1.78556	0.129276	13.812	2.16e-43	3.69e-41
SLC45A1	18.9547	1.78543	0.502944	3.54995	0.0003853	0.00110848
PLEKHG3	115.7	1.78516	0.298732	5.97578	2.29e-09	1.41e-08
MUS81	184.837	1.78349	0.254798	6.99962	2.57e-12	2.29e-11
SURF1	473.893	1.78288	0.19976	8.9251	4.45e-19	8.37e-18
ARIH2OS	26.1829	1.78285	0.541219	3.29415	0.000987214	0.00263675
MRPS26	1940.13	1.78285	0.163928	10.8758	1.5e-27	6.81e-26
NDUFV3	515.438	1.78266	0.170302	10.4677	1.22e-25	4.49e-24
PCIF1	910.094	1.78148	0.170941	10.4217	1.97e-25	7.14e-24
STAG3L5P-PVRIG2P-PILRB	21.0924	1.78052	0.481308	3.69935	0.000216156	0.000650608
ABHD12	420.356	1.77997	0.21178	8.40483	4.28e-17	6.49e-16
SLC2A8	156.342	1.77734	0.265155	6.70302	2.04e-11	1.62e-10
P2RY2	141.977	1.77611	0.279792	6.34797	2.18e-10	1.52e-09
GPX4	1415.55	1.77527	0.143075	12.408	2.37e-35	2.04e-33
GPX1	4263.51	1.77318	0.146926	12.0685	1.55e-33	1.15e-31
UNC93B1	83.2685	1.77302	0.359199	4.93603	7.97e-07	3.47e-06
DDX56	1813.02	1.77281	0.186362	9.51273	1.86e-21	4.34e-20
MRPL14	8884.48	1.77162	0.126066	14.0531	7.37e-45	1.39e-42
C19orf25	155.439	1.77102	0.251747	7.03492	1.99e-12	1.81e-11
TMEM115	336.583	1.77067	0.266186	6.65203	2.89e-11	2.26e-10
CHST3	542.726	1.76903	0.204702	8.64201	5.52e-18	9.21e-17
ADRM1	2928.74	1.76841	0.24164	7.31838	2.51e-13	2.53e-12
DCAF15	486.303	1.76792	0.186403	9.48443	2.44e-21	5.66e-20
FAM53B	87.4208	1.7676	0.41952	4.21338	2.52e-05	8.87e-05
MSRB1	257.969	1.76696	0.287783	6.13991	8.26e-10	5.37e-09
MKNK2	722.267	1.76655	0.168438	10.4878	9.83e-26	3.7e-24
STAB2	70.4468	1.76574	0.324871	5.4352	5.47e-08	2.77e-07
JDP2	29.1901	1.76548	0.477287	3.69899	0.000216458	0.0006514
H1FX	760.156	1.76537	0.168364	10.4854	1.01e-25	3.78e-24
C4orf19	34.7374	1.76496	0.559026	3.15721	0.00159286	0.00410214
C1orf50	376.823	1.76466	0.201655	8.75089	2.12e-18	3.65e-17
LYPLA2	1534.42	1.76411	0.247248	7.135	9.68e-13	9.16e-12
TMEM208	2830.79	1.76394	0.143072	12.329	6.32e-35	5.21e-33
LSR	64.1026	1.76116	0.380534	4.62814	3.69e-06	1.47e-05
TMEM120A	210.409	1.75918	0.233084	7.54742	4.44e-14	4.85e-13
JAGN1	2941.24	1.75814	0.212698	8.26586	1.39e-16	1.98e-15
CMYA5	25.0355	1.75755	0.473968	3.70816	0.000208769	0.000630109
GPR1	185.752	1.75726	0.300303	5.85161	4.87e-09	2.86e-08
FAM225A	355.052	1.7563	0.179421	9.78869	1.26e-22	3.37e-21
CAPZB	2549.52	1.75579	0.164141	10.6968	1.05e-26	4.33e-25
EEF1B2	9025.49	1.75555	0.127962	13.7193	7.78e-43	1.26e-40
IL18	786.282	1.75534	0.194276	9.0353	1.64e-19	3.21e-18
NDUFS5	9638.24	1.75512	0.182125	9.6369	5.58e-22	1.38e-20
SLC4A11	248.176	1.75511	0.238386	7.36249	1.81e-13	1.84e-12
RGL2	453.2	1.75306	0.198192	8.8453	9.13e-19	1.64e-17
B4GALT2	184.092	1.75232	0.293844	5.96343	2.47e-09	1.51e-08
DEAF1	235.473	1.75195	0.2696	6.49834	8.12e-11	5.97e-10
COL16A1	47.0787	1.75195	0.455965	3.84229	0.000121894	0.000382169
CANT1	883.768	1.75158	0.225167	7.77901	7.31e-15	8.69e-14
RPS6KB2	158.145	1.75147	0.396408	4.41835	9.95e-06	3.71e-05
ZMAT5	89.1835	1.75131	0.361967	4.83832	1.31e-06	5.54e-06
GALNT5	234.535	1.74711	0.221094	7.90214	2.74e-15	3.42e-14
PPP1CA	2249.56	1.74652	0.403248	4.33114	1.48e-05	5.39e-05
GLI2	27.1127	1.74551	0.4799	3.63723	0.000275581	0.000814973
COX14	1852.6	1.74514	0.19151	9.11251	8.05e-20	1.63e-18
COMMD5	2295.81	1.7421	0.196315	8.87403	7.05e-19	1.29e-17
BRF1	113.591	1.74174	0.297491	5.85476	4.78e-09	2.81e-08
GRB7	10.829	1.74004	0.616144	2.82409	0.00474153	0.0110932
TLR9	24.9604	1.73885	0.498934	3.48513	0.000491905	0.00138602
SPRY1	2508.91	1.73657	0.182518	9.51452	1.83e-21	4.29e-20
BANF1	11989.3	1.73645	0.141814	12.2446	1.8e-34	1.45e-32
GAK	263.375	1.73532	0.21951	7.90542	2.67e-15	3.34e-14
GAL	10.1484	1.73519	0.572853	3.02903	0.00245342	0.00611027
TCIRG1	320.495	1.73463	0.246068	7.0494	1.8e-12	1.64e-11
MIER2	185.379	1.73409	0.315549	5.49549	3.9e-08	2e-07
HSPG2	56.6306	1.73391	0.328061	5.28532	1.25e-07	6.07e-07
TMEM42	920.135	1.73383	0.168261	10.3044	6.73e-25	2.31e-23
C20orf27	810.87	1.73114	0.201561	8.58867	8.8e-18	1.44e-16
HPCAL1	1000.55	1.73005	0.175209	9.87422	5.39e-23	1.5e-21
LRRC37A6P	21.2321	1.72894	0.517515	3.34084	0.000835249	0.00225769
EREG	1166.46	1.72798	0.175855	9.82618	8.69e-23	2.38e-21
PRR7	80.8501	1.72792	0.381734	4.5265	6e-06	2.31e-05
LOC102724927	27.1463	1.72697	0.533564	3.23667	0.00120932	0.00318334
GALE	542.2	1.72648	0.22931	7.529	5.11e-14	5.56e-13
ZNHIT1	290.956	1.72605	0.235954	7.31519	2.57e-13	2.59e-12
RIN1	174.087	1.72572	0.279771	6.16834	6.9e-10	4.53e-09
SMIM12	1945.45	1.72542	0.174727	9.87495	5.35e-23	1.49e-21
PAQR4	87.7115	1.72306	0.3653	4.71684	2.4e-06	9.78e-06
CYTH1	829.197	1.72306	0.243169	7.08586	1.38e-12	1.28e-11
FAM98C	70.5268	1.72261	0.340958	5.05227	4.37e-07	1.96e-06
PVRL2	959.494	1.72239	0.270411	6.36952	1.9e-10	1.34e-09
PRADC1	310.13	1.72218	0.233506	7.37531	1.64e-13	1.68e-12
HSBP1L1	392.885	1.72208	0.178554	9.64462	5.18e-22	1.29e-20
ACTR1A	2183.91	1.72178	0.160628	10.719	8.29e-27	3.46e-25
ABCF3	456.838	1.72141	0.227745	7.55851	4.08e-14	4.47e-13
SORL1	33.7081	1.71981	0.498537	3.44971	0.000561181	0.00156615
WNT10B	17.267	1.71949	0.533767	3.22143	0.00127555	0.00334693
CRELD1	188.081	1.71946	0.290732	5.91424	3.33e-09	2e-08
MEPCE	481.605	1.71882	0.197946	8.68324	3.85e-18	6.52e-17
IFI27L1	300.743	1.7186	0.21936	7.8346	4.7e-15	5.73e-14
CEMP1	17.825	1.71854	0.519459	3.30832	0.000938563	0.00251335
MAN2C1	253.191	1.71804	0.227516	7.55129	4.31e-14	4.72e-13
MX1	86.339	1.71661	0.343481	4.99768	5.8e-07	2.57e-06
TP73-AS1	79.8222	1.71653	0.354	4.84895	1.24e-06	5.27e-06
MRPL43	2186.53	1.71627	0.167617	10.2392	1.32e-24	4.39e-23
LOH12CR1	228.351	1.71554	0.255771	6.70732	1.98e-11	1.57e-10
PHC2	2271.31	1.71524	0.148108	11.581	5.15e-31	3.19e-29
BCS1L	462.336	1.71464	0.203072	8.4435	3.08e-17	4.73e-16
RAPSN	96.4643	1.71379	0.348586	4.91642	8.81e-07	3.81e-06
C1orf122	286.063	1.71154	0.235423	7.27005	3.59e-13	3.58e-12
RABGGTA	228.762	1.71153	0.26239	6.52283	6.9e-11	5.12e-10
NAA60	239.139	1.71087	0.232358	7.36306	1.8e-13	1.84e-12
CIART	180.484	1.70918	0.300601	5.68588	1.3e-08	7.18e-08
RPS19BP1	1217.76	1.70893	0.14162	12.067	1.58e-33	1.17e-31
FSTL3	189.451	1.70746	0.227054	7.52007	5.47e-14	5.92e-13
CAPN15	199.191	1.70569	0.228876	7.45247	9.16e-14	9.66e-13
ENDOV	417.206	1.70551	0.19391	8.79539	1.43e-18	2.5e-17
MVP	647.542	1.70537	0.179228	9.51511	1.82e-21	4.27e-20
EPS8L2	112.35	1.70529	0.275591	6.18776	6.1e-10	4.04e-09
POLR1C	3158.87	1.70498	0.2286	7.45836	8.76e-14	9.27e-13
FASN	249.068	1.70488	0.214907	7.9331	2.14e-15	2.7e-14
RAD9A	100.396	1.7041	0.275976	6.17482	6.62e-10	4.36e-09
TRADD	138.638	1.70403	0.247204	6.89323	5.45e-12	4.68e-11
LPHN1	139.574	1.70396	0.257353	6.6211	3.57e-11	2.76e-10
LTBR	651.821	1.70383	0.228495	7.45675	8.87e-14	9.38e-13
DCTPP1	2188.31	1.70262	0.155798	10.9284	8.43e-28	3.9e-26
MCRS1	1221.1	1.70243	0.188695	9.02212	1.84e-19	3.6e-18
CCDC103	65.4387	1.70194	0.359813	4.73006	2.24e-06	9.21e-06
BYSL	888.548	1.70169	0.187387	9.08114	1.07e-19	2.13e-18
PPIE	1460.76	1.70107	0.17368	9.7943	1.19e-22	3.21e-21
GPATCH3	131.251	1.70079	0.27508	6.18288	6.29e-10	4.16e-09
MRPS34	840.086	1.70003	0.185266	9.17617	4.47e-20	9.34e-19
MRPL33	7547.45	1.69839	0.190991	8.89252	5.97e-19	1.11e-17
ORMDL2	2014.68	1.698	0.145814	11.645	2.43e-31	1.55e-29
SCAND1	761.027	1.69639	0.155135	10.9349	7.85e-28	3.66e-26
MADD	706.985	1.69576	0.226134	7.49892	6.43e-14	6.92e-13
NOL3	207.991	1.69444	0.341276	4.965	6.87e-07	3.02e-06
FOSL2	245.33	1.69265	0.241259	7.01591	2.28e-12	2.05e-11
GPN2	307.86	1.69261	0.234441	7.2198	5.21e-13	5.08e-12
TBRG4	732.038	1.69207	0.200253	8.44965	2.92e-17	4.51e-16
FAM160A2	608.68	1.692	0.256771	6.58952	4.41e-11	3.37e-10
UBAC1	334.021	1.69153	0.182209	9.28345	1.64e-20	3.6e-19
INPPL1	275.423	1.69047	0.204095	8.28273	1.2e-16	1.73e-15
TMEM200B	39.2063	1.69047	0.394456	4.28556	1.82e-05	6.54e-05
ATP5G1	8521.51	1.68875	0.17271	9.77795	1.4e-22	3.73e-21
GPR153	82.5033	1.68835	0.308906	5.46556	4.61e-08	2.36e-07
TTLL11	50.1093	1.68641	0.354223	4.76089	1.93e-06	7.98e-06
RPL7A	9408.99	1.6861	0.176951	9.52859	1.59e-21	3.77e-20
BOP1	355.83	1.68531	0.282826	5.95881	2.54e-09	1.55e-08
DMAP1	409.935	1.68402	0.193827	8.68824	3.68e-18	6.25e-17
POLDIP3	1037.01	1.68263	0.142418	11.8147	3.28e-32	2.23e-30
TARBP2	818.191	1.67987	0.192712	8.71699	2.86e-18	4.89e-17
RAB11FIP5	804.982	1.67954	0.189041	8.88457	6.42e-19	1.18e-17
PPOX	119.456	1.67747	0.347745	4.82385	1.41e-06	5.92e-06
PSMB6	12246.7	1.67687	0.142493	11.7681	5.7e-32	3.77e-30
ZNF71	142.522	1.67687	0.317173	5.28693	1.24e-07	6.02e-07
NSMF	117.461	1.67661	0.309796	5.41199	6.23e-08	3.14e-07
TOLLIP	700.774	1.67464	0.165069	10.1451	3.48e-24	1.1e-22
MRPL54	496.127	1.67434	0.206374	8.11312	4.93e-16	6.7e-15
ZNF524	79.6055	1.67418	0.302259	5.53889	3.04e-08	1.59e-07
KLHDC8B	160.958	1.67303	0.293011	5.70977	1.13e-08	6.3e-08
UPP1	738.59	1.67266	0.213788	7.82392	5.12e-15	6.21e-14
GSDMD	505.063	1.67122	0.211714	7.89373	2.93e-15	3.64e-14
ARMC5	80.3836	1.67031	0.353653	4.72303	2.32e-06	9.5e-06
MEGF6	10.8502	1.66996	0.613227	2.72323	0.00646468	0.0146567
PDLIM2	245.261	1.669	0.229149	7.28346	3.25e-13	3.25e-12
CSNK1G2	230.236	1.66894	0.258784	6.44916	1.12e-10	8.12e-10
HIST1H2AB	13.4153	1.66845	0.577098	2.8911	0.00383891	0.00915382
MRPL51	6528.54	1.66773	0.194997	8.55261	1.2e-17	1.93e-16
ZFPL1	381.762	1.66674	0.25466	6.54496	5.95e-11	4.46e-10
RPS18	13796.1	1.66648	0.15908	10.4758	1.12e-25	4.14e-24
CSF1	653.246	1.6662	0.179805	9.26672	1.92e-20	4.17e-19
C11orf48	14.497	1.6649	0.553981	3.00534	0.00265287	0.0065622
FAM173A	69.45	1.66416	0.361935	4.59796	4.27e-06	1.69e-05
C21orf33	384.148	1.66395	0.238022	6.99073	2.73e-12	2.43e-11
NECAB3	127.797	1.6633	0.262415	6.33842	2.32e-10	1.62e-09
ACPT	10.4412	1.66289	0.579229	2.87086	0.00409352	0.00970731
SNORA61	29.1892	1.66226	0.42246	3.93472	8.33e-05	0.000269915
ACOT4	50.564	1.6622	0.399923	4.1563	3.23e-05	0.000112069
KIAA0195	173.625	1.66177	0.243811	6.81581	9.37e-12	7.8e-11
PMM2	357.977	1.66171	0.192108	8.64989	5.16e-18	8.61e-17
LOC150381	712.554	1.66101	0.222302	7.47188	7.91e-14	8.39e-13
IQSEC2	77.6865	1.66045	0.315676	5.25997	1.44e-07	6.92e-07
DEF8	482.574	1.66025	0.184146	9.01596	1.95e-19	3.8e-18
RBM38	130.219	1.65987	0.298794	5.55522	2.77e-08	1.46e-07
SHROOM2	194.831	1.65968	0.28667	5.78951	7.06e-09	4.04e-08
GRWD1	1075.58	1.65907	0.18925	8.76654	1.84e-18	3.2e-17
ZNF446	94.4027	1.6576	0.307573	5.3893	7.07e-08	3.54e-07
FLOT1	4278.47	1.65729	0.143991	11.5097	1.18e-30	6.99e-29
C6orf106	2598.08	1.65709	0.171781	9.64651	5.09e-22	1.27e-20
C6orf132	123.551	1.656	0.324557	5.10233	3.35e-07	1.53e-06
LZTS2	520.993	1.65415	0.168116	9.83937	7.62e-23	2.1e-21
SNHG15	1726.59	1.65361	0.142655	11.5916	4.54e-31	2.84e-29
TMEM161B-AS1	517.668	1.65348	0.244435	6.76448	1.34e-11	1.09e-10
TUBA4A	872.572	1.6533	0.283673	5.8282	5.6e-09	3.26e-08
LINC00857	88.9726	1.65279	0.352163	4.69325	2.69e-06	1.09e-05
C7orf61	29.1164	1.65255	0.464158	3.56031	0.000370424	0.00106975
GPC1	38.9354	1.65202	0.376027	4.39336	1.12e-05	4.13e-05
FRG1	2636.21	1.65163	0.147808	11.1742	5.45e-29	2.82e-27
ATRAID	5569.45	1.65146	0.199137	8.29307	1.1e-16	1.6e-15
IMPA2	738.37	1.6497	0.169572	9.7286	2.28e-22	5.9e-21
C17orf59	73.529	1.64938	0.375836	4.38855	1.14e-05	4.22e-05
TACC3	769.619	1.64865	0.211163	7.80747	5.83e-15	7.05e-14
ZNF496	275.157	1.64807	0.284163	5.79973	6.64e-09	3.83e-08
PSMB9	2766.19	1.64775	0.148939	11.0633	1.89e-28	9.21e-27
KLHL21	625.976	1.64723	0.192213	8.56979	1.04e-17	1.68e-16
PITPNM1	55.0472	1.64712	0.430146	3.8292	0.000128559	0.000400924
POMT1	134.112	1.64637	0.283533	5.80664	6.37e-09	3.68e-08
RPL35	3380.31	1.64594	0.188469	8.73322	2.48e-18	4.25e-17
ADCY6	179.031	1.6457	0.231553	7.10725	1.18e-12	1.11e-11
PLXND1	198.377	1.64562	0.245058	6.71523	1.88e-11	1.5e-10
ELMO3	16.2576	1.6456	0.530473	3.10213	0.00192135	0.00487996
POLR2G	4246.05	1.64519	0.148364	11.0888	1.42e-28	7.11e-27
ENGASE	48.4942	1.64459	0.422167	3.8956	9.8e-05	0.000313467
NLRP14	22.2784	1.64431	0.521153	3.15514	0.0016042	0.00413005
CDC42EP4	1013.29	1.64431	0.196324	8.37551	5.5e-17	8.23e-16
SYNGR2	3073.86	1.643	0.229628	7.15508	8.36e-13	7.98e-12
ITPA	1348.44	1.64216	0.153603	10.6909	1.12e-26	4.6e-25
EPHB2	407.381	1.64162	0.169371	9.69246	3.25e-22	8.24e-21
C1orf216	268.858	1.63906	0.279174	5.87111	4.33e-09	2.56e-08
MICALL2	65.5126	1.63884	0.30941	5.29667	1.18e-07	5.74e-07
STARD3	323.7	1.63577	0.248684	6.57771	4.78e-11	3.63e-10
RNF175	12.3699	1.63476	0.557377	2.93296	0.00335748	0.00812509
NAGPA	97.4414	1.63454	0.343755	4.75496	1.98e-06	8.21e-06
RHBDD3	195.933	1.63391	0.23956	6.82049	9.07e-12	7.57e-11
MRPL2	2620.5	1.63228	0.180164	9.05995	1.31e-19	2.57e-18
CLIC1	31604.2	1.63151	0.193262	8.44199	3.12e-17	4.78e-16
NAT14	213.068	1.63115	0.244783	6.66364	2.67e-11	2.09e-10
ZNF282	390.072	1.63055	0.17911	9.1036	8.74e-20	1.75e-18
HEIH	126.287	1.63005	0.284623	5.72704	1.02e-08	5.73e-08
TMEM55B	609.734	1.62956	0.218831	7.44664	9.58e-14	1.01e-12
HLA-DMB	22.6701	1.62924	0.538142	3.02753	0.00246565	0.00613888
WDR25	96.1463	1.62799	0.337083	4.82963	1.37e-06	5.76e-06
PTPRH	98.1946	1.62775	0.256166	6.35429	2.09e-10	1.47e-09
IRF3	570.1	1.62636	0.182344	8.91917	4.7e-19	8.82e-18
COMMD9	798.586	1.62557	0.249528	6.51456	7.29e-11	5.39e-10
PHLDA3	73.9766	1.62448	0.348213	4.66519	3.08e-06	1.24e-05
ZNF787	82.4002	1.62378	0.292249	5.55615	2.76e-08	1.46e-07
FLJ43879	12.8629	1.62369	0.59334	2.73652	0.00620928	0.0141186
GLUL	838.731	1.62286	0.154079	10.5326	6.11e-26	2.32e-24
ROBO2	50.3945	1.62203	0.394016	4.11666	3.84e-05	0.000131553
SHROOM1	216.111	1.62183	0.239221	6.77963	1.2e-11	9.88e-11
ARHGEF1	460.182	1.62117	0.19636	8.25611	1.5e-16	2.14e-15
CPSF1	211.344	1.62113	0.249452	6.49876	8.1e-11	5.96e-10
FBXO31	178.672	1.6211	0.249929	6.48626	8.8e-11	6.44e-10
ACTR1B	362.403	1.62077	0.226944	7.14171	9.22e-13	8.74e-12
C8orf48	69.336	1.62063	0.453783	3.57137	0.000355125	0.00102798
LINC00466	22.761	1.62024	0.486826	3.32817	0.000874199	0.00235251
HDDC3	274.946	1.62014	0.253545	6.38992	1.66e-10	1.18e-09
SERTAD1	626.359	1.62012	0.16591	9.76502	1.59e-22	4.21e-21
POLR3D	208.183	1.62006	0.200711	8.07161	6.94e-16	9.23e-15
THAP11	796.476	1.6199	0.192349	8.4217	3.71e-17	5.65e-16
CIB1	2454.85	1.61933	0.135825	11.9221	9.08e-33	6.5e-31
CYB561D2	894.394	1.61931	0.194536	8.32399	8.51e-17	1.24e-15
PLXNA2	635.374	1.61919	0.168797	9.59257	8.59e-22	2.08e-20
PPFIBP2	13.4908	1.61866	0.618219	2.61826	0.00883784	0.0194539
NLE1	204.783	1.6185	0.24331	6.65201	2.89e-11	2.26e-10
TIMM8B	2323.19	1.61788	0.152662	10.5978	3.05e-26	1.19e-24
ATP1A1-AS1	112.508	1.61752	0.253825	6.37258	1.86e-10	1.31e-09
POMGNT1	463.233	1.61749	0.228049	7.09275	1.31e-12	1.22e-11
NBEAL2	60.29	1.6172	0.371273	4.35582	1.33e-05	4.86e-05
PCBP4	155.949	1.6156	0.257046	6.28526	3.27e-10	2.24e-09
METTL1	467.781	1.61475	0.230097	7.0177	2.26e-12	2.03e-11
KLF3	1508.38	1.61437	0.170532	9.46664	2.89e-21	6.67e-20
ZNF341	111.847	1.61436	0.277077	5.8264	5.66e-09	3.29e-08
MRPS2	1061.61	1.61338	0.207815	7.76357	8.26e-15	9.74e-14
SLC12A9	93.5814	1.61338	0.300094	5.37624	7.61e-08	3.79e-07
LOC641746	13.7706	1.61334	0.571479	2.8231	0.00475615	0.0111212
TUBB2A	404.653	1.61299	0.191734	8.41262	4.01e-17	6.09e-16
ZNF512B	101.553	1.61288	0.28677	5.6243	1.86e-08	1.01e-07
METTL5	5938.97	1.61231	0.156925	10.2743	9.2e-25	3.11e-23
SMYD5	383.957	1.61134	0.231296	6.9666	3.25e-12	2.87e-11
LOC100506100	781.032	1.61111	0.238775	6.74739	1.51e-11	1.22e-10
TOR2A	158.453	1.61102	0.289107	5.57241	2.51e-08	1.34e-07
LRRC41	517.537	1.61064	0.21609	7.45355	9.09e-14	9.59e-13
UCKL1	644.486	1.6105	0.203863	7.89993	2.79e-15	3.48e-14
NSUN5P1	68.1516	1.61014	0.404292	3.98262	6.82e-05	0.000223973
KAT2A	398.766	1.61005	0.223053	7.21823	5.27e-13	5.14e-12
CCDC13	15.8015	1.60991	0.560863	2.87042	0.00409928	0.00971958
MIR4435-1HG	1861.2	1.60972	0.18375	8.76034	1.95e-18	3.37e-17
ACOX2	330.645	1.60927	0.247181	6.5105	7.49e-11	5.53e-10
C1orf159	84.7795	1.60889	0.376816	4.26971	1.96e-05	6.99e-05
RPP38	751.212	1.60832	0.180706	8.90021	5.57e-19	1.04e-17
RPLP0	12534.6	1.60779	0.155671	10.3281	5.26e-25	1.82e-23
TUBB3	920.726	1.60673	0.152264	10.5523	4.96e-26	1.9e-24
KRT15	67.916	1.60634	0.362063	4.43662	9.14e-06	3.43e-05
SDHAF2	1241.75	1.60578	0.186388	8.61529	6.98e-18	1.15e-16
GSN-AS1	118.373	1.60494	0.268738	5.97212	2.34e-09	1.44e-08
SLC25A19	57.0924	1.60454	0.455142	3.52535	0.000422923	0.00120573
YIF1B	715.795	1.60282	0.234011	6.84933	7.42e-12	6.26e-11
SUSD3	30.4618	1.6022	0.567334	2.82409	0.00474155	0.0110932
UNC13D	196.257	1.60202	0.230923	6.93748	3.99e-12	3.49e-11
NXT1	3632.49	1.60149	0.175079	9.1472	5.84e-20	1.2e-18
RPL34	8916.32	1.60115	0.229029	6.99104	2.73e-12	2.43e-11
ROMO1	2321.61	1.60103	0.252792	6.3334	2.4e-10	1.67e-09
ASPSCR1	180.686	1.59979	0.233163	6.86125	6.83e-12	5.79e-11
PLEKHG4	59.623	1.59971	0.391371	4.08744	4.36e-05	0.000148032
GABRE	19.0452	1.59967	0.604473	2.64639	0.00813571	0.0180342
PLIN3	2357.77	1.59877	0.1688	9.47137	2.76e-21	6.39e-20
GEMIN4	358.577	1.59854	0.219461	7.28396	3.24e-13	3.24e-12
C9orf114	293.907	1.59847	0.236444	6.76046	1.38e-11	1.12e-10
C8orf59	2216.5	1.59817	0.166547	9.59591	8.32e-22	2.01e-20
ZNRF1	653.896	1.59802	0.154795	10.3235	5.52e-25	1.9e-23
ERBB2	544.503	1.59792	0.17195	9.29293	1.5e-20	3.31e-19
LRRC8A	4229.96	1.59718	0.140521	11.3661	6.17e-30	3.47e-28
PPP4C	2715.94	1.59699	0.248458	6.4276	1.3e-10	9.31e-10
SFXN5	194.965	1.59614	0.29306	5.44646	5.14e-08	2.61e-07
SUGP1	284.62	1.59602	0.202765	7.8713	3.51e-15	4.31e-14
RHBDF1	363.318	1.59509	0.204551	7.79801	6.29e-15	7.55e-14
ABTB2	300.257	1.59494	0.251629	6.33846	2.32e-10	1.62e-09
CALHM3	16.4185	1.59487	0.590468	2.70103	0.00691247	0.0155666
STEAP3	444.643	1.59403	0.183624	8.6809	3.93e-18	6.63e-17
CRIP2	675.272	1.59373	0.213448	7.4666	8.23e-14	8.71e-13
PLBD1	138.275	1.59292	0.290621	5.48108	4.23e-08	2.17e-07
SPATA20	323.246	1.59254	0.205087	7.76519	8.15e-15	9.63e-14
E2F1	360.705	1.59199	0.282142	5.64253	1.68e-08	9.13e-08
LOC100507002	277.246	1.59186	0.18966	8.39324	4.73e-17	7.12e-16
PTRH1	128.151	1.59155	0.256816	6.19722	5.75e-10	3.82e-09
GUK1	1756.99	1.59	0.188225	8.44731	2.98e-17	4.59e-16
CA3	11.7786	1.58844	0.590627	2.6894	0.00715799	0.0160534
STX10	920.973	1.58728	0.221536	7.16489	7.78e-13	7.47e-12
PSMG3	1624.68	1.58724	0.141774	11.1956	4.29e-29	2.25e-27
USP19	421.323	1.58717	0.208528	7.61131	2.71e-14	3.05e-13
C12orf10	781.127	1.58708	0.185682	8.54727	1.26e-17	2.02e-16
MYEOV	1137.23	1.58673	0.200784	7.90268	2.73e-15	3.41e-14
ECHDC2	322.368	1.58604	0.196356	8.07741	6.62e-16	8.81e-15
RHOC	2225.91	1.58121	0.21146	7.47758	7.57e-14	8.05e-13
UBA7	76.5063	1.58102	0.350264	4.51381	6.37e-06	2.44e-05
MAN1B1	246.927	1.581	0.276968	5.70826	1.14e-08	6.35e-08
C1orf53	295.033	1.58058	0.208556	7.5787	3.49e-14	3.86e-13
L3MBTL2	299.235	1.58011	0.195459	8.0841	6.26e-16	8.39e-15
HS1BP3	58.0886	1.57904	0.389396	4.0551	5.01e-05	0.000168207
PSMD13	3199.52	1.57902	0.171803	9.19091	3.9e-20	8.22e-19
AGRN	122.94	1.57875	0.249528	6.32692	2.5e-10	1.74e-09
MRPL17	3431.72	1.57863	0.120373	13.1145	2.72e-39	3.57e-37
OTUB1	1030.67	1.5785	0.207737	7.59853	3e-14	3.34e-13
AP1B1	245.648	1.57749	0.250692	6.29255	3.12e-10	2.15e-09
STAT5A	347.022	1.5772	0.282968	5.57377	2.49e-08	1.33e-07
ADAM8	1142.52	1.57672	0.192314	8.19866	2.43e-16	3.39e-15
SPACA6P	56.8537	1.5766	0.390432	4.03809	5.39e-05	0.000180088
YIF1A	924.151	1.57628	0.222634	7.08012	1.44e-12	1.33e-11
LOC493754	796.087	1.57564	0.173552	9.07881	1.1e-19	2.18e-18
LOC284080	27.5349	1.57534	0.454463	3.46638	0.000527524	0.00148028
CENPB	134.01	1.575	0.265627	5.92938	3.04e-09	1.84e-08
HES2	20.9476	1.57465	0.516277	3.05002	0.00228829	0.00572684
DUSP28	132.001	1.57411	0.251354	6.26255	3.79e-10	2.57e-09
STX1A	732.732	1.57161	0.1715	9.16388	5.01e-20	1.04e-18
WDR34	1043.37	1.57113	0.235095	6.68297	2.34e-11	1.85e-10
ZC3H10	64.986	1.57104	0.420895	3.73263	0.000189491	0.000575203
EPN2	844.11	1.57079	0.187691	8.36903	5.81e-17	8.65e-16
ATG4B	436.887	1.57044	0.185462	8.46771	2.5e-17	3.9e-16
HLA-DRA	276.627	1.56985	0.324422	4.83892	1.31e-06	5.52e-06
TOX2	243.121	1.56882	0.259127	6.05423	1.41e-09	8.9e-09
NDUFA2	3106.19	1.56881	0.200599	7.82061	5.26e-15	6.37e-14
PPM1M	70.7487	1.56833	0.330315	4.74799	2.05e-06	8.48e-06
ECHS1	3028.21	1.56646	0.185905	8.42612	3.57e-17	5.45e-16
FAM86DP	79.2063	1.56633	0.361593	4.33176	1.48e-05	5.38e-05
LINC00639	21.2256	1.56596	0.538367	2.90873	0.003629	0.00871357
ARHGEF4	16.1562	1.56465	0.521365	3.00107	0.00269033	0.00664084
RALGDS	319.124	1.56431	0.242385	6.45384	1.09e-10	7.89e-10
TRAF1	294.838	1.56377	0.172317	9.07497	1.14e-19	2.25e-18
STRA13	1208.53	1.56271	0.144814	10.7912	3.79e-27	1.65e-25
SNHG5	3714.57	1.56194	0.245882	6.3524	2.12e-10	1.48e-09
CACNA2D4	56.9549	1.56161	0.48622	3.21173	0.0013194	0.00345318
MED15	919.847	1.56072	0.147799	10.5598	4.58e-26	1.76e-24
LZTR1	226.822	1.55941	0.318634	4.89404	9.88e-07	4.24e-06
C11orf68	430.866	1.55838	0.244575	6.37176	1.87e-10	1.32e-09
NAPRT1	144.554	1.55673	0.34548	4.50598	6.61e-06	2.53e-05
CC2D1B	267.052	1.55624	0.267504	5.81763	5.97e-09	3.46e-08
EIF3F	3158.34	1.55428	0.165024	9.41849	4.58e-21	1.04e-19
DUS1L	264.207	1.55376	0.197262	7.87663	3.36e-15	4.14e-14
POLE	257.223	1.55371	0.267993	5.79758	6.73e-09	3.87e-08
RPS7	9984.77	1.55345	0.171033	9.08272	1.06e-19	2.11e-18
PTRF	5445.15	1.55335	0.171072	9.0801	1.08e-19	2.15e-18
PRCC	758.367	1.55304	0.179909	8.63236	6.01e-18	1e-16
HIST1H2AI	14.9931	1.55198	0.532524	2.91438	0.00356401	0.00857181
LYPD1	15.0035	1.55164	0.535688	2.89653	0.00377314	0.00902001
LINC01088	35.7141	1.55141	0.460272	3.37064	0.000749927	0.00204798
MGAT1	1335.88	1.55066	0.160214	9.67871	3.71e-22	9.36e-21
SMDT1	923.034	1.55045	0.164477	9.42655	4.24e-21	9.63e-20
GLTPD1	61.6304	1.5498	0.386362	4.01128	6.04e-05	0.000200163
PREB	664.292	1.54926	0.275393	5.62563	1.85e-08	1e-07
PHOSPHO2	147.231	1.54888	0.25431	6.09052	1.13e-09	7.2e-09
DOLK	359.57	1.54841	0.286398	5.40649	6.43e-08	3.23e-07
ZNF418	101.98	1.54718	0.282501	5.47673	4.33e-08	2.22e-07
NUMA1	1028.64	1.54672	0.154459	10.0138	1.33e-23	3.93e-22
ATP6V0E2	474.255	1.54642	0.182147	8.48995	2.07e-17	3.24e-16
TMEM143	38.9	1.54629	0.384094	4.02582	5.68e-05	0.000188759
P4HTM	204.466	1.54575	0.334879	4.61584	3.92e-06	1.55e-05
ATG9A	601.32	1.54467	0.179183	8.62067	6.66e-18	1.1e-16
LARS2	310.147	1.54417	0.231239	6.6778	2.43e-11	1.91e-10
LINC01311	13.0171	1.54376	0.555622	2.77843	0.00546216	0.0125785
TRAPPC1	3840.3	1.54344	0.173646	8.88843	6.2e-19	1.14e-17
C19orf40	208.943	1.54311	0.258106	5.97858	2.25e-09	1.39e-08
AFMID	286.906	1.54285	0.220581	6.99447	2.66e-12	2.37e-11
POLD1	214.627	1.54151	0.205335	7.50733	6.03e-14	6.5e-13
HIST1H4C	285.957	1.5413	0.314891	4.8947	9.85e-07	4.23e-06
SRRT	1010.45	1.54075	0.133895	11.5072	1.21e-30	7.16e-29
AHDC1	161.297	1.54062	0.230209	6.69227	2.2e-11	1.74e-10
FBRSL1	113.83	1.54025	0.290886	5.29505	1.19e-07	5.78e-07
PPFIA3	12.1768	1.53949	0.602289	2.55607	0.0105862	0.0229001
CMC1	2590.95	1.53935	0.158243	9.72775	2.3e-22	5.94e-21
SNORD55	13.6703	1.53911	0.567956	2.70992	0.00673003	0.0151975
GSTO1	9971.55	1.53887	0.145501	10.5764	3.84e-26	1.49e-24
DBP	59.7366	1.53763	0.393141	3.91114	9.19e-05	0.000295284
SNAPC2	369.758	1.5362	0.258278	5.94785	2.72e-09	1.66e-08
PYCARD	23.1729	1.53609	0.45644	3.36537	0.000764405	0.00208474
BIN1	260.431	1.53595	0.253134	6.06775	1.3e-09	8.22e-09
GGT1	19.1737	1.53508	0.579821	2.64751	0.00810877	0.0179769
UCK1	352.296	1.53493	0.214871	7.14348	9.1e-13	8.65e-12
REEP4	798.401	1.53371	0.228961	6.69857	2.1e-11	1.67e-10
EDC4	452.181	1.53346	0.203626	7.53077	5.04e-14	5.49e-13
NCAPH2	302.606	1.53342	0.241623	6.34632	2.21e-10	1.54e-09
CRY2	124.498	1.53271	0.310244	4.94032	7.8e-07	3.4e-06
SH3GLB2	168.525	1.53099	0.234156	6.53832	6.22e-11	4.65e-10
HIRIP3	491.578	1.52981	0.208264	7.34552	2.05e-13	2.09e-12
REC8	49.8004	1.5295	0.426312	3.58776	0.000333531	0.000970434
PTCH2	19.6398	1.5291	0.512691	2.98251	0.002859	0.00701498
VPS25	2662.55	1.52868	0.201106	7.60136	2.93e-14	3.28e-13
TBC1D2	294.372	1.52859	0.192488	7.94123	2e-15	2.54e-14
PET100	2056.03	1.52767	0.271589	5.62494	1.86e-08	1.01e-07
C19orf43	4613.66	1.52754	0.136582	11.184	4.88e-29	2.54e-27
CREB3L1	432.396	1.52721	0.192342	7.94007	2.02e-15	2.56e-14
CBR3	320.789	1.52677	0.242771	6.2889	3.2e-10	2.2e-09
CDCA5	2570.32	1.52664	0.194433	7.85178	4.1e-15	5.03e-14
CELSR3	79.4961	1.52575	0.342659	4.45267	8.48e-06	3.19e-05
SEZ6	11.5086	1.52446	0.617608	2.46834	0.0135743	0.0286685
HDHD3	116.536	1.52435	0.376213	4.05182	5.08e-05	0.00017044
THAP3	188.079	1.52377	0.274412	5.55286	2.81e-08	1.48e-07
VPS37B	1625.52	1.5229	0.209789	7.25919	3.89e-13	3.86e-12
NCBP2-AS2	1167.57	1.52198	0.180565	8.42899	3.49e-17	5.33e-16
RPUSD2	254.952	1.52178	0.28239	5.38895	7.09e-08	3.54e-07
SYDE1	476.892	1.52167	0.195841	7.76994	7.85e-15	9.29e-14
SERPINC1	69.7232	1.52165	0.329973	4.61144	4e-06	1.59e-05
COX19	1083.81	1.52155	0.148557	10.2422	1.28e-24	4.27e-23
RPS2	10057.6	1.52119	0.129675	11.7308	8.86e-32	5.79e-30
TTC7A	322.599	1.521	0.211189	7.20206	5.93e-13	5.75e-12
CNN2	838.125	1.52009	0.149556	10.164	2.87e-24	9.11e-23
TRPM3	17.155	1.51997	0.60759	2.50163	0.0123622	0.0263187
MAP3K11	127.823	1.5198	0.264096	5.75473	8.68e-09	4.91e-08
PI4KAP1	176.836	1.51942	0.24869	6.10969	9.98e-10	6.42e-09
TMBIM1	2083.92	1.51925	0.187947	8.08339	6.3e-16	8.42e-15
ABR	1038.19	1.51897	0.137005	11.087	1.45e-28	7.22e-27
DUSP23	778.363	1.51793	0.173706	8.73848	2.36e-18	4.07e-17
PTDSS2	105.751	1.51767	0.334121	4.54226	5.57e-06	2.16e-05
USF2	453.348	1.51759	0.229293	6.61858	3.63e-11	2.8e-10
UBXN1	1319.1	1.51644	0.199098	7.61654	2.61e-14	2.94e-13
FBXO6	13.3015	1.51598	0.592018	2.5607	0.0104463	0.0226102
PLCB4	102.419	1.51502	0.324423	4.66988	3.01e-06	1.22e-05
FIS1	1264.61	1.5149	0.149306	10.1463	3.44e-24	1.08e-22
C19orf48	1253.06	1.51487	0.269527	5.62049	1.9e-08	1.03e-07
POC1A	335.411	1.51463	0.320194	4.73033	2.24e-06	9.2e-06
TMEM11	2068.85	1.51452	0.257034	5.89229	3.81e-09	2.27e-08
PEX11G	16.5872	1.51315	0.556835	2.71742	0.0065793	0.0148857
LIN7B	63.9855	1.51208	0.365213	4.14025	3.47e-05	0.000119727
TRIM41	228.069	1.51097	0.22483	6.7205	1.81e-11	1.45e-10
MTX1	541.972	1.51088	0.42753	3.53399	0.000409342	0.0011719
AGPAT6	839.639	1.51083	0.188682	8.00726	1.17e-15	1.52e-14
GPR56	213.478	1.51036	0.254609	5.93209	2.99e-09	1.82e-08
ELP5	1465.46	1.51035	0.218847	6.90141	5.15e-12	4.44e-11
XYLT2	132.597	1.51019	0.269398	5.6058	2.07e-08	1.12e-07
SFN	515.298	1.50947	0.207967	7.25821	3.92e-13	3.89e-12
CCDC23	653.386	1.50904	0.187529	8.04698	8.49e-16	1.11e-14
FMNL1	790.714	1.50897	0.152924	9.86748	5.76e-23	1.59e-21
MFSD10	393.287	1.50593	0.292092	5.15569	2.53e-07	1.17e-06
CNP	1798.35	1.50559	0.169157	8.90055	5.56e-19	1.04e-17
LEMD2	347.034	1.50528	0.233005	6.46028	1.05e-10	7.58e-10
DDB2	339.835	1.50522	0.201345	7.47583	7.67e-14	8.15e-13
C17orf53	227.478	1.50467	0.270642	5.55962	2.7e-08	1.43e-07
SMUG1	1129.75	1.50406	0.158411	9.4947	2.21e-21	5.13e-20
SLC35G5	13.1961	1.50252	0.570209	2.63504	0.00841278	0.0185931
ATXN7L3	394.279	1.50242	0.20691	7.26124	3.84e-13	3.81e-12
BHLHE41	219.151	1.50233	0.241376	6.22403	4.85e-10	3.25e-09
NFKBIA	11126.6	1.50211	0.143607	10.4599	1.32e-25	4.87e-24
NOSIP	1414.76	1.50177	0.169449	8.86263	7.81e-19	1.42e-17
ADC	92.2463	1.50149	0.35867	4.18628	2.84e-05	9.92e-05
ZNF736	58.9925	1.50148	0.36272	4.1395	3.48e-05	0.000120072
RAD54L	294.202	1.50109	0.209698	7.15837	8.16e-13	7.81e-12
STAP2	117.347	1.50073	0.367422	4.08449	4.42e-05	0.000149803
ACOT7	729.528	1.50058	0.246183	6.09539	1.09e-09	7e-09
DECR2	125.976	1.49993	0.273082	5.4926	3.96e-08	2.04e-07
MRPL22	2845.59	1.49821	0.167853	8.92576	4.43e-19	8.33e-18
TSKU	235.906	1.49815	0.240003	6.24222	4.31e-10	2.91e-09
KIF13B	490.326	1.49738	0.197492	7.58196	3.4e-14	3.77e-13
TIMM13	1714.68	1.49704	0.173825	8.61233	7.16e-18	1.18e-16
VRK3	551.096	1.49602	0.238798	6.26481	3.73e-10	2.54e-09
CLK3	502.942	1.49552	0.192414	7.77244	7.7e-15	9.12e-14
RNMTL1	548.582	1.49528	0.216442	6.90844	4.9e-12	4.23e-11
GPAT2	218.086	1.49449	0.218321	6.84538	7.63e-12	6.42e-11
DMPK	206.592	1.49375	0.254157	5.87727	4.17e-09	2.47e-08
FBXL6	91.7585	1.49337	0.394512	3.78536	0.000153485	0.000473081
NDUFB3	6873.04	1.49276	0.175932	8.48487	2.16e-17	3.38e-16
JUP	573.3	1.49258	0.16772	8.89924	5.62e-19	1.05e-17
WNT7B	52.7381	1.49078	0.345828	4.31076	1.63e-05	5.87e-05
FERMT3	17.5974	1.49064	0.573587	2.5988	0.0093549	0.0204685
TACO1	760.697	1.48978	0.189363	7.86735	3.62e-15	4.45e-14
MED9	175.949	1.48974	0.275242	5.41247	6.22e-08	3.13e-07
GGACT	13.2346	1.48958	0.57044	2.61127	0.00902061	0.0198137
ZNF749	143.837	1.489	0.2313	6.43752	1.21e-10	8.75e-10
TRPT1	282.171	1.48868	0.198959	7.48234	7.3e-14	7.78e-13
ZC3H12A	118.197	1.48744	0.278531	5.3403	9.28e-08	4.57e-07
SNORD104	21.8198	1.48585	0.493475	3.01099	0.00260396	0.00645385
VEGFB	344.129	1.48574	0.181339	8.19316	2.54e-16	3.54e-15
TBCC	1924.76	1.48567	0.206887	7.18108	6.92e-13	6.68e-12
PAFAH1B3	499.104	1.48532	0.184699	8.04185	8.85e-16	1.16e-14
PLAT	3516.26	1.48416	0.142148	10.441	1.61e-25	5.9e-24
GMPPB	118.401	1.48402	0.309421	4.7961	1.62e-06	6.76e-06
VSTM2L	21.8924	1.483	0.458076	3.23746	0.00120598	0.00317609
LOC100506801	20.2195	1.48231	0.532431	2.78404	0.00536868	0.0123893
CARHSP1	763.719	1.48223	0.171247	8.65549	4.91e-18	8.22e-17
UBL4A	891.784	1.48184	0.167418	8.85112	8.66e-19	1.56e-17
TRMT1	458.247	1.48122	0.219138	6.7593	1.39e-11	1.13e-10
SLC43A1	141.563	1.4799	0.304077	4.86685	1.13e-06	4.84e-06
MCM5	637.299	1.47705	0.166809	8.85476	8.39e-19	1.52e-17
AAAS	690.986	1.47686	0.203192	7.26829	3.64e-13	3.62e-12
FAM225B	196.239	1.47661	0.265784	5.55566	2.77e-08	1.46e-07
C14orf2	8062.95	1.47608	0.188493	7.83096	4.84e-15	5.89e-14
SPAG7	1971.87	1.476	0.205885	7.16906	7.55e-13	7.26e-12
C16orf59	129.851	1.47571	0.286965	5.14248	2.71e-07	1.25e-06
SGSM3	53.6935	1.47567	0.351437	4.19896	2.68e-05	9.42e-05
CYP27A1	173.783	1.4752	0.351999	4.19092	2.78e-05	9.73e-05
LINC00152	5588.28	1.47514	0.18981	7.77168	7.75e-15	9.17e-14
FAM134A	1595.21	1.47502	0.150682	9.78899	1.26e-22	3.37e-21
ACP2	370.151	1.4748	0.216098	6.82467	8.81e-12	7.36e-11
GAL3ST4	27.8174	1.47341	0.432621	3.40578	0.00065975	0.00181714
FASTK	233.508	1.47273	0.21576	6.82576	8.75e-12	7.31e-11
ALDH3B1	130.8	1.47244	0.238502	6.17368	6.67e-10	4.39e-09
AGTRAP	538.579	1.47211	0.282759	5.20624	1.93e-07	9.1e-07
SKIV2L	245.292	1.47153	0.281157	5.23384	1.66e-07	7.9e-07
PSD	21.5451	1.47152	0.504416	2.91727	0.00353106	0.00850253
C19orf70	888.535	1.47075	0.204056	7.20758	5.7e-13	5.53e-12
AMDHD2	53.0428	1.47062	0.404518	3.6355	0.000277442	0.000819738
TMEM256	257.925	1.4706	0.257277	5.71601	1.09e-08	6.09e-08
IRF1	794.867	1.47005	0.251905	5.83572	5.36e-09	3.13e-08
OCIAD2	6806.64	1.46879	0.150996	9.72738	2.3e-22	5.96e-21
CENPO	645.488	1.46872	0.249727	5.88132	4.07e-09	2.41e-08
NTMT1	251.62	1.46795	0.265812	5.52253	3.34e-08	1.74e-07
RABL6	510.405	1.46694	0.196089	7.48099	7.38e-14	7.84e-13
FAM86A	48.2796	1.46624	0.457008	3.20835	0.00133501	0.003489
CTDP1	125.118	1.46612	0.260551	5.62699	1.83e-08	9.95e-08
SLC25A28	558.186	1.46611	0.21325	6.8751	6.19e-12	5.29e-11
C4BPB	185.451	1.4661	0.380247	3.85566	0.000115416	0.000363595
RELA	1050.77	1.46591	0.178741	8.20134	2.38e-16	3.31e-15
ULK3	177.169	1.46551	0.293542	4.99252	5.96e-07	2.63e-06
HEBP2	2319.17	1.46119	0.179425	8.14375	3.83e-16	5.25e-15
TOMM40	842.559	1.46045	0.270389	5.40129	6.62e-08	3.32e-07
SNX17	2228.7	1.46007	0.202202	7.22086	5.17e-13	5.05e-12
PCBD1	474.096	1.4598	0.180073	8.10671	5.2e-16	7.03e-15
ABT1	2212.35	1.45979	0.210448	6.93662	4.02e-12	3.51e-11
GEMIN8P4	17.5804	1.45951	0.579261	2.51961	0.0117484	0.025162
PLEKHA7	105.903	1.45808	0.361338	4.03522	5.46e-05	0.000182137
SLC25A10	149.827	1.45805	0.334696	4.35634	1.32e-05	4.85e-05
PCDHGA10	48.6135	1.45596	0.463416	3.14179	0.00167916	0.00430883
RPUSD1	136.315	1.45452	0.260134	5.59142	2.25e-08	1.21e-07
PUF60	2326.89	1.45429	0.18998	7.65495	1.93e-14	2.22e-13
WBSCR16	292.163	1.45425	0.215751	6.7404	1.58e-11	1.27e-10
RASSF9	13.2851	1.45258	0.608502	2.38714	0.0169799	0.0350532
SGSM2	260.279	1.45189	0.19126	7.5912	3.17e-14	3.52e-13
PSENEN	3136.89	1.45187	0.143319	10.1304	4.05e-24	1.27e-22
RPS23	23263.1	1.45117	0.199471	7.27508	3.46e-13	3.46e-12
STPG1	275.538	1.45104	0.229562	6.32089	2.6e-10	1.8e-09
NDUFB8	4082.9	1.45104	0.128741	11.2709	1.83e-29	9.92e-28
AKR1A1	1012.24	1.45058	0.198364	7.31272	2.62e-13	2.64e-12
SNHG11	332.202	1.45016	0.243074	5.96591	2.43e-09	1.49e-08
AGR2	213.563	1.44975	0.230234	6.29683	3.04e-10	2.09e-09
MED19	920.288	1.44937	0.158333	9.15391	5.49e-20	1.13e-18
LOC150776	295.385	1.44876	0.212166	6.82842	8.59e-12	7.18e-11
YBEY	327.704	1.44855	0.198851	7.28461	3.23e-13	3.23e-12
BLVRA	1237.07	1.44801	0.194351	7.4505	9.3e-14	9.79e-13
ZNF784	20.3277	1.44762	0.514626	2.81297	0.00490869	0.0114371
INPP5K	503.077	1.44733	0.167785	8.62608	6.35e-18	1.06e-16
TNKS1BP1	479.374	1.44628	0.158001	9.15362	5.51e-20	1.14e-18
GHDC	155.422	1.44608	0.305143	4.73902	2.15e-06	8.83e-06
MAST2	297.963	1.44602	0.230238	6.28054	3.37e-10	2.31e-09
LAGE3	1155.7	1.44582	0.158729	9.10876	8.33e-20	1.68e-18
SDF4	317.468	1.44564	0.299697	4.82366	1.41e-06	5.93e-06
FBXW9	66.099	1.44526	0.386713	3.7373	0.000186006	0.000565672
ST3GAL4	277.872	1.44494	0.543583	2.65818	0.00785635	0.0174716
MAP4K2	58.9704	1.44481	0.326595	4.42386	9.7e-06	3.62e-05
TSPAN17	424.654	1.44393	0.193203	7.47364	7.8e-14	8.28e-13
HIST1H2AM	49.7916	1.44316	0.336077	4.29414	1.75e-05	6.3e-05
HMBS	914.449	1.44174	0.205332	7.02152	2.19e-12	1.98e-11
FLJ23867	26.5949	1.44151	0.472559	3.05044	0.00228507	0.00572041
SLC25A25	119.655	1.44041	0.286288	5.03134	4.87e-07	2.18e-06
ECH1	2457.52	1.43881	0.264555	5.43858	5.37e-08	2.72e-07
OSR1	133.3	1.43879	0.36955	3.89336	9.89e-05	0.000316003
RDH13	294.45	1.43825	0.230809	6.23131	4.63e-10	3.11e-09
ZFYVE19	233.555	1.43737	0.249132	5.76949	7.95e-09	4.51e-08
GTF3C1	410.804	1.43714	0.197665	7.27056	3.58e-13	3.56e-12
BBC3	52.9489	1.43656	0.373691	3.84426	0.000120918	0.000379692
UBOX5	105.571	1.43653	0.278103	5.16547	2.4e-07	1.12e-06
FBRS	164.169	1.43633	0.233292	6.15678	7.42e-10	4.86e-09
PFN1	39850.8	1.43589	0.171492	8.37292	5.62e-17	8.39e-16
OSBPL7	114.474	1.43588	0.269131	5.33526	9.54e-08	4.68e-07
TMC6	121.168	1.43582	0.308636	4.65214	3.29e-06	1.32e-05
PRRC2A	470.778	1.43559	0.215063	6.67522	2.47e-11	1.94e-10
ANKRD13D	311.16	1.43479	0.236675	6.06227	1.34e-09	8.49e-09
NHP2	5310.34	1.43417	0.119434	12.008	3.22e-33	2.34e-31
NDUFS3	1761.39	1.43416	0.183757	7.80468	5.97e-15	7.19e-14
TAB1	74.3964	1.43393	0.294592	4.86751	1.13e-06	4.82e-06
BDNF	345.318	1.43378	0.197906	7.24474	4.33e-13	4.27e-12
STK10	728.325	1.43373	0.193432	7.41203	1.24e-13	1.29e-12
NDUFB9	1561.42	1.43212	0.172293	8.31215	9.4e-17	1.37e-15
TMCO4	96.3152	1.43208	0.29303	4.88714	1.02e-06	4.39e-06
TINF2	601.076	1.43199	0.220509	6.49404	8.36e-11	6.13e-10
INPP5E	411.504	1.43168	0.200029	7.15737	8.22e-13	7.86e-12
IP6K1	793.787	1.43109	0.159144	8.99245	2.42e-19	4.66e-18
CMTM7	7587.61	1.43108	0.184414	7.76013	8.48e-15	9.99e-14
COQ6	763.944	1.43076	0.258211	5.54105	3.01e-08	1.57e-07
WDR83OS	4666.96	1.42964	0.128925	11.089	1.42e-28	7.11e-27
THAP4	405.981	1.42887	0.24665	5.79313	6.91e-09	3.96e-08
MRPS14	4681.13	1.42781	0.14216	10.0437	9.79e-24	2.93e-22
SARS2	145.369	1.42585	0.265768	5.36502	8.09e-08	4.01e-07
SNRPC	11985.1	1.42574	0.138944	10.2613	1.05e-24	3.53e-23
TOM1	69.629	1.42493	0.311213	4.57862	4.68e-06	1.84e-05
LGALSL	88.9234	1.42459	0.3027	4.70627	2.52e-06	1.03e-05
RAB35	396.438	1.42281	0.242288	5.87238	4.3e-09	2.54e-08
GPR137	177.312	1.42249	0.264432	5.3794	7.47e-08	3.72e-07
SPHK1	292.15	1.42138	0.248344	5.72342	1.04e-08	5.84e-08
CACNB3	34.7579	1.42042	0.411994	3.44767	0.000565446	0.00157672
RPS3A	11649.1	1.42024	0.184117	7.7138	1.22e-14	1.43e-13
GTF2H5	3716.43	1.42019	0.17581	8.07794	6.59e-16	8.77e-15
PSMB5	10415	1.42007	0.134979	10.5207	6.94e-26	2.62e-24
PLXNB3	75.2531	1.41966	0.354605	4.0035	6.24e-05	0.000206077
ATAD3B	222.288	1.41966	0.274343	5.17475	2.28e-07	1.07e-06
AARS	686.628	1.41948	0.199279	7.12309	1.06e-12	9.96e-12
DHX8	740.304	1.41928	0.193327	7.34135	2.11e-13	2.15e-12
DNMBP-AS1	130.417	1.41866	0.288255	4.92155	8.59e-07	3.72e-06
SDK1	31.4132	1.41836	0.555107	2.55511	0.0106155	0.0229513
HDAC5	326.462	1.41789	0.168823	8.39869	4.52e-17	6.81e-16
QSOX1	1062.03	1.41747	0.207005	6.84752	7.51e-12	6.33e-11
KEAP1	602.668	1.41526	0.25012	5.65832	1.53e-08	8.36e-08
RPS13	10557.2	1.41476	0.184794	7.65588	1.92e-14	2.2e-13
CABIN1	169.344	1.41423	0.256857	5.5059	3.67e-08	1.9e-07
JTB	2607.65	1.41335	0.167058	8.46019	2.67e-17	4.14e-16
KAT8	160.842	1.41325	0.297181	4.75553	1.98e-06	8.19e-06
ARFIP2	652.09	1.41323	0.241975	5.8404	5.21e-09	3.05e-08
CORO7	46.0337	1.413	0.391496	3.60924	0.000307097	0.000899261
PRX	28.498	1.41284	0.473656	2.98284	0.00285584	0.00700828
TOPORS-AS1	92.5931	1.4128	0.30834	4.58193	4.61e-06	1.81e-05
MROH6	52.7028	1.41211	0.37094	3.80683	0.000140761	0.000436075
COQ9	773.409	1.41198	0.184531	7.65173	1.98e-14	2.27e-13
THAP7	142.746	1.41157	0.32219	4.38117	1.18e-05	4.36e-05
SNORD35B	16.0215	1.41146	0.530119	2.66253	0.00775565	0.0172734
NTHL1	333.806	1.41131	0.21776	6.48103	9.11e-11	6.65e-10
PLCL2	189.812	1.41025	0.253382	5.56571	2.61e-08	1.38e-07
ZMYND19	641.13	1.40992	0.237388	5.93931	2.86e-09	1.74e-08
FANCG	983.102	1.40962	0.168328	8.37424	5.56e-17	8.31e-16
PDCD2L	936.967	1.40935	0.168624	8.35799	6.38e-17	9.43e-16
CIC	115.123	1.40879	0.269746	5.22265	1.76e-07	8.37e-07
RTKN	196.619	1.40857	0.233361	6.03601	1.58e-09	9.91e-09
MVB12A	704.603	1.40781	0.221569	6.35384	2.1e-10	1.47e-09
ORC1	286.766	1.40776	0.232887	6.0448	1.5e-09	9.4e-09
MBD3	326.74	1.40743	0.225099	6.25249	4.04e-10	2.74e-09
CCND3	2136.17	1.40673	0.161079	8.73314	2.48e-18	4.25e-17
OSBP2	43.2457	1.40637	0.362424	3.88045	0.000104263	0.000331774
PDF	15.0327	1.40606	0.538213	2.61246	0.00898938	0.0197583
SLC8B1	205.255	1.40496	0.293026	4.79464	1.63e-06	6.8e-06
HIST2H2AC	24.5326	1.40412	0.483874	2.90183	0.00370994	0.0088941
WTIP	31.2406	1.40359	0.483921	2.90045	0.0037263	0.0089268
NDUFA12	10009.2	1.40277	0.148822	9.4258	4.27e-21	9.69e-20
PIAS4	219.422	1.40235	0.25207	5.56334	2.65e-08	1.4e-07
EXOSC5	558.608	1.40151	0.250252	5.60037	2.14e-08	1.15e-07
B3GNT1	329.508	1.40127	0.201057	6.96953	3.18e-12	2.81e-11
NOB1	502.591	1.40053	0.180772	7.7475	9.37e-15	1.1e-13
STARD10	113.462	1.40041	0.339837	4.12083	3.78e-05	0.000129411
CUEDC1	152.617	1.40032	0.259592	5.39431	6.88e-08	3.45e-07
RNF220	1503.56	1.39966	0.174708	8.01142	1.13e-15	1.47e-14
LONP1	220.428	1.39908	0.288427	4.85074	1.23e-06	5.22e-06
C17orf89	675.101	1.39797	0.236885	5.90146	3.6e-09	2.15e-08
PCDHGA5	40.3497	1.39767	0.441676	3.16447	0.00155368	0.0040151
TPRA1	323.819	1.39715	0.243681	5.7335	9.84e-09	5.53e-08
COLGALT2	231.705	1.39703	0.260186	5.36937	7.9e-08	3.92e-07
CCDC106	52.0002	1.39689	0.377943	3.69604	0.000218992	0.000658663
SLC25A22	309.256	1.39677	0.21998	6.34952	2.16e-10	1.51e-09
UNC13B	260.281	1.3963	0.21848	6.39098	1.65e-10	1.17e-09
ING5	769.386	1.39603	0.191056	7.30695	2.73e-13	2.75e-12
PCDHGB2	18.4252	1.39588	0.567258	2.46074	0.013865	0.029241
EIF2B4	562.075	1.39565	0.20541	6.79443	1.09e-11	8.97e-11
ZNF142	266.647	1.3955	0.307303	4.54111	5.6e-06	2.17e-05
VPS51	456.249	1.39531	0.197889	7.05099	1.78e-12	1.62e-11
WNT5B	294.159	1.39505	0.21397	6.51984	7.04e-11	5.21e-10
AOC3	14.7364	1.39464	0.537097	2.59662	0.00941453	0.0205853
C12orf45	841.558	1.39353	0.179229	7.77513	7.54e-15	8.94e-14
AURKC	79.8308	1.39336	0.330956	4.21011	2.55e-05	8.98e-05
PITX2	13.9761	1.39305	0.617311	2.25663	0.0240311	0.0478754
SMARCAL1	185.07	1.3921	0.260525	5.34346	9.12e-08	4.49e-07
C9orf3	2175.48	1.39184	0.206731	6.7326	1.67e-11	1.34e-10
RNF26	970.826	1.39171	0.168588	8.25511	1.52e-16	2.16e-15
RAB11FIP3	100.11	1.3914	0.274684	5.06546	4.07e-07	1.84e-06
SCYL1	123.039	1.3908	0.292815	4.74974	2.04e-06	8.41e-06
B4GALT1-AS1	32.9215	1.39071	0.468803	2.9665	0.00301206	0.00735864
FHL3	444.349	1.39046	0.22018	6.31512	2.7e-10	1.87e-09
PILRB	19.897	1.39037	0.486005	2.86082	0.00422541	0.00998976
NUBP1	457.091	1.39013	0.20471	6.79075	1.12e-11	9.19e-11
DUS2	159.728	1.38966	0.31696	4.38434	1.16e-05	4.29e-05
PRMT7	145.035	1.38904	0.273609	5.07675	3.84e-07	1.74e-06
MUM1	223.514	1.3887	0.237366	5.85048	4.9e-09	2.88e-08
FAM132B	13.2496	1.38796	0.571153	2.4301	0.0150946	0.0315464
SLC15A3	41.8914	1.38736	0.427965	3.24175	0.00118799	0.00313171
KLHDC3	1396.49	1.38705	0.186084	7.45388	9.06e-14	9.58e-13
DHX38	471.863	1.38692	0.195893	7.07996	1.44e-12	1.33e-11
TSR3	320.856	1.38686	0.278804	4.97432	6.55e-07	2.88e-06
FAM109A	58.8683	1.38627	0.421013	3.2927	0.000992295	0.00264946
IGHMBP2	210.834	1.38593	0.212997	6.50682	7.68e-11	5.67e-10
AMIGO3	36.7248	1.38584	0.47293	2.93033	0.00338597	0.00818078
BCL2L12	1718.3	1.38542	0.12457	11.1216	9.85e-29	5.05e-27
HSPBP1	482.259	1.38537	0.194783	7.11239	1.14e-12	1.07e-11
HLA-H	126.472	1.38521	0.261654	5.29407	1.2e-07	5.81e-07
TINAGL1	400.629	1.38465	0.243678	5.68228	1.33e-08	7.32e-08
ARMC7	63.5014	1.38398	0.415371	3.33192	0.000862497	0.00232331
SMPD2	73.1023	1.38362	0.353329	3.91596	9e-05	0.00029007
RAB24	485.747	1.38251	0.208459	6.63206	3.31e-11	2.57e-10
RHOBTB2	121.312	1.38193	0.279582	4.94284	7.7e-07	3.36e-06
MTL5	25.1389	1.38118	0.471173	2.93138	0.00337463	0.00816058
ZSCAN18	451.481	1.38116	0.176732	7.81499	5.5e-15	6.64e-14
COA7	698.715	1.3811	0.218092	6.33265	2.41e-10	1.68e-09
SLC2A4RG	46.3374	1.37958	0.360142	3.83067	0.000127794	0.000398688
RPPH1	99.3795	1.37923	0.392469	3.51424	0.000441021	0.00125275
MXD4	188.58	1.37899	0.239755	5.75165	8.84e-09	4.99e-08
C19orf53	2068.24	1.37889	0.141437	9.74915	1.86e-22	4.88e-21
USP5	251.13	1.37883	0.266422	5.17537	2.27e-07	1.06e-06
TADA3	681.177	1.37817	0.162794	8.46577	2.54e-17	3.97e-16
SLC17A9	319.979	1.37731	0.243218	5.66288	1.49e-08	8.15e-08
BATF3	108.952	1.37692	0.295116	4.66569	3.08e-06	1.24e-05
TRAF2	317.318	1.37691	0.21279	6.47076	9.75e-11	7.08e-10
SELENBP1	56.9569	1.37681	0.36081	3.8159	0.000135689	0.000421235
RFX2	65.7208	1.37677	0.329883	4.17352	3e-05	0.00010452
LCAT	107.119	1.37668	0.357233	3.85372	0.000116339	0.000366292
SNTA1	69.5658	1.37625	0.308767	4.45725	8.3e-06	3.13e-05
SPNS2	67.0278	1.37614	0.397127	3.46524	0.000529762	0.00148554
SIGIRR	68.0254	1.37576	0.350173	3.9288	8.54e-05	0.000276096
TCEA3	418.55	1.37468	0.214946	6.3955	1.6e-10	1.14e-09
RBM4	1565.04	1.37437	0.175838	7.81613	5.45e-15	6.59e-14
TTN-AS1	58.0689	1.37389	0.342569	4.01055	6.06e-05	0.000200625
SERF2	1127.58	1.37358	0.139118	9.87353	5.42e-23	1.5e-21
WDR54	1872.13	1.37353	0.163162	8.41819	3.82e-17	5.82e-16
UBC	1570.9	1.37236	0.263021	5.2177	1.81e-07	8.58e-07
LOC100288911	55.29	1.37169	0.352145	3.89525	9.81e-05	0.000313807
PDLIM4	515.21	1.37106	0.192906	7.1074	1.18e-12	1.11e-11
CDK10	400.825	1.37093	0.221071	6.20129	5.6e-10	3.73e-09
MYO18A	62.1528	1.37076	0.327362	4.18728	2.82e-05	9.88e-05
NDUFAB1	7454.16	1.37016	0.159924	8.56754	1.06e-17	1.71e-16
SCG2	194.124	1.36947	0.293324	4.66878	3.03e-06	1.22e-05
C9orf69	164.755	1.36747	0.276007	4.95447	7.25e-07	3.17e-06
RASSF1	601.116	1.36745	0.222836	6.13656	8.43e-10	5.48e-09
MIEN1	1386.68	1.3668	0.136792	9.99183	1.65e-23	4.86e-22
TRMT112	17037.4	1.3667	0.159401	8.57402	9.99e-18	1.62e-16
DPF1	41.088	1.36654	0.471387	2.89898	0.00374377	0.00896341
SNAI3-AS1	14.3025	1.36568	0.551678	2.47551	0.0133046	0.0281605
EGR4	10.1176	1.36563	0.577164	2.3661	0.0179767	0.0369301
PSMB4	3056.93	1.36492	0.155098	8.80036	1.36e-18	2.4e-17
SOCS1	51.8183	1.36486	0.470635	2.90003	0.00373122	0.00893729
TMED1	1220.77	1.36462	0.238807	5.71432	1.1e-08	6.14e-08
IMPDH1	164.69	1.36428	0.296855	4.5958	4.31e-06	1.7e-05
TXNL4A	2957.97	1.36393	0.126499	10.7821	4.18e-27	1.8e-25
PATL2	30.9293	1.36363	0.451365	3.02113	0.00251833	0.00626053
OBFC1	1005.91	1.36336	0.208183	6.54886	5.8e-11	4.35e-10
THRA	36.1537	1.36324	0.433461	3.14501	0.00166081	0.00426441
LRRC75A	25.4723	1.36242	0.478992	2.84435	0.00445015	0.0104668
ZNF646	19.376	1.36237	0.520287	2.61851	0.00883158	0.0194428
DHRS12	125.105	1.3621	0.303966	4.4811	7.43e-06	2.82e-05
NUDT16	378.889	1.36185	0.171234	7.95317	1.82e-15	2.31e-14
MANBAL	2083.47	1.36163	0.237902	5.72351	1.04e-08	5.84e-08
RABAC1	1632.92	1.36121	0.141117	9.64597	5.11e-22	1.28e-20
SAPCD2	406.205	1.36091	0.263728	5.16028	2.47e-07	1.15e-06
ZSWIM7	1575.51	1.35963	0.138777	9.7972	1.16e-22	3.13e-21
HERC2P4	56.9847	1.35913	0.377356	3.60172	0.000316124	0.000923223
GAS5	2468.44	1.35911	0.193416	7.02688	2.11e-12	1.91e-11
RPL35A	10995.9	1.35896	0.198482	6.8468	7.55e-12	6.36e-11
DPP9	1011.85	1.35881	0.162256	8.3745	5.55e-17	8.3e-16
MAEA	611.655	1.35856	0.220443	6.16284	7.15e-10	4.68e-09
ANGPTL2	71.3552	1.35771	0.345881	3.92536	8.66e-05	0.000279915
HINT1	12877.9	1.35765	0.146574	9.26258	2e-20	4.33e-19
COL3A1	69.7047	1.35756	0.560546	2.42185	0.0154417	0.0321858
COX5B	2903.97	1.35745	0.168629	8.04994	8.28e-16	1.09e-14
YPEL3	380.898	1.35723	0.1836	7.39233	1.44e-13	1.5e-12
TBCD	372.525	1.35703	0.220959	6.14154	8.17e-10	5.32e-09
MFNG	13.1872	1.35701	0.563798	2.40691	0.0160881	0.0334185
WRAP73	506.322	1.35589	0.170192	7.96683	1.63e-15	2.08e-14
HMOX2	610.889	1.35329	0.262115	5.16295	2.43e-07	1.13e-06
TPGS1	20.8106	1.35324	0.458275	2.95289	0.00314815	0.00765691
KPTN	101.863	1.35314	0.309171	4.37667	1.21e-05	4.44e-05
RPL9	11836.9	1.35239	0.185639	7.28507	3.22e-13	3.22e-12
GRK6	195.169	1.35168	0.279226	4.84082	1.29e-06	5.47e-06
CYB561	1347.04	1.35078	0.15899	8.49599	1.96e-17	3.09e-16
TNFRSF14	105.614	1.34942	0.312546	4.31752	1.58e-05	5.71e-05
PSMG4	903.714	1.34815	0.197693	6.81941	9.14e-12	7.61e-11
LOC145783	90.9399	1.34799	0.297773	4.52692	5.99e-06	2.31e-05
SPATS2L	7482.56	1.34775	0.132269	10.1895	2.21e-24	7.18e-23
LRP5L	46.0477	1.3469	0.37955	3.54868	0.000387163	0.00111326
TMEM255B	152.037	1.34578	0.273862	4.91408	8.92e-07	3.85e-06
TMEM219	1041.74	1.34447	0.176728	7.60753	2.79e-14	3.13e-13
OPA3	648.827	1.34368	0.150065	8.95396	3.43e-19	6.51e-18
SLC25A42	80.0291	1.34296	0.371723	3.61278	0.000302929	0.000887849
MZT2A	448.015	1.3413	0.188327	7.12218	1.06e-12	1e-11
SNCG	46.1802	1.34108	0.367702	3.64719	0.000265125	0.000786317
SPRR2E	29.0165	1.34098	0.584051	2.296	0.0216761	0.043634
HAX1	1628.75	1.34065	0.178451	7.5127	5.79e-14	6.25e-13
FAM229B	221.843	1.34064	0.235417	5.69473	1.24e-08	6.84e-08
KLHL35	33.3431	1.34062	0.413034	3.24579	0.00117124	0.00309203
RELT	192.672	1.34	0.214636	6.24315	4.29e-10	2.89e-09
MSRB2	658.434	1.33966	0.19424	6.89692	5.31e-12	4.57e-11
RABIF	1726.95	1.33948	0.138877	9.64507	5.16e-22	1.28e-20
SEC61A1	1809.91	1.3393	0.170695	7.84614	4.29e-15	5.25e-14
POLR3K	4731.56	1.33892	0.14073	9.51414	1.83e-21	4.3e-20
GCN1L1	1206.19	1.33841	0.138544	9.66049	4.44e-22	1.12e-20
DHRS7B	1001.47	1.3382	0.210279	6.36391	1.97e-10	1.38e-09
PRRT3-AS1	160.794	1.33804	0.238241	5.61635	1.95e-08	1.05e-07
FADS3	144.267	1.33721	0.323152	4.13802	3.5e-05	0.000120743
C16orf95	72.7396	1.33665	0.317326	4.21222	2.53e-05	8.9e-05
INHBB	74.6679	1.33622	0.446576	2.99214	0.00277027	0.00681765
PLEC	2670.95	1.33594	0.137197	9.73735	2.09e-22	5.46e-21
SHMT2	948.049	1.33517	0.215213	6.20394	5.51e-10	3.67e-09
PRKAR1B	81.4275	1.33502	0.336	3.97328	7.09e-05	0.000232011
NAT10	795.505	1.33465	0.169075	7.89385	2.93e-15	3.64e-14
LOC100996437	13.7552	1.3346	0.555009	2.40465	0.016188	0.0336004
PCDHB2	83.9219	1.33295	0.374767	3.55674	0.000375491	0.00108349
RILP	74.1345	1.33257	0.330798	4.02835	5.62e-05	0.000186966
PLCD4	123.043	1.33239	0.293738	4.536	5.73e-06	2.22e-05
HEXIM2	181.581	1.33212	0.311216	4.28036	1.87e-05	6.68e-05
CCDC130	290.699	1.33155	0.250485	5.31589	1.06e-07	5.19e-07
RAB42	36.9911	1.33147	0.418984	3.17784	0.00148374	0.00384465
SSTR2	69.9038	1.32963	0.355902	3.73595	0.000187008	0.00056819
ZFP41	86.8889	1.32947	0.315568	4.21294	2.52e-05	8.88e-05
MFSD3	117.368	1.32765	0.388015	3.42164	0.000622438	0.00172304
TMEM80	196.18	1.32754	0.229655	5.78058	7.44e-09	4.25e-08
KMT2B	377.274	1.3273	0.164008	8.0929	5.83e-16	7.83e-15
PEF1	1567.83	1.32719	0.232032	5.71983	1.07e-08	5.96e-08
TMCC2	20.7201	1.32664	0.540592	2.45406	0.0141253	0.0297404
CCDC101	114.234	1.32664	0.242671	5.46682	4.58e-08	2.34e-07
MZT2B	104.876	1.32638	0.304352	4.35805	1.31e-05	4.82e-05
PELP1	240.609	1.32637	0.233296	5.68537	1.31e-08	7.2e-08
RIC8A	947.927	1.32602	0.154729	8.56997	1.04e-17	1.68e-16
TNFAIP8L1	183.443	1.32583	0.305699	4.33704	1.44e-05	5.26e-05
MIR22HG	492.051	1.32486	0.175983	7.52832	5.14e-14	5.58e-13
SPAG5	935.005	1.32324	0.208414	6.34912	2.17e-10	1.51e-09
RAPGEF1	420.587	1.32319	0.2019	6.5537	5.61e-11	4.23e-10
C17orf62	220.38	1.32288	0.231936	5.70366	1.17e-08	6.51e-08
TRMT61A	176.476	1.32275	0.257508	5.13674	2.8e-07	1.29e-06
EIF4G1	2996.37	1.32179	0.199625	6.62136	3.56e-11	2.75e-10
2019-09-09	329.838	1.32127	0.189736	6.96371	3.31e-12	2.92e-11
KLHL17	154.893	1.32087	0.23443	5.63438	1.76e-08	9.55e-08
FAM219B	364.256	1.32086	0.25144	5.25319	1.49e-07	7.16e-07
HIST1H3C	25.385	1.32077	0.476407	2.77235	0.00556529	0.012789
IL4R	607.871	1.3199	0.200048	6.59794	4.17e-11	3.19e-10
RITA1	627.381	1.31963	0.211081	6.25176	4.06e-10	2.75e-09
ADD1	1802.54	1.3187	0.16213	8.1336	4.17e-16	5.69e-15
AHCY	955.756	1.31863	0.186248	7.07994	1.44e-12	1.33e-11
RANGAP1	1435.62	1.31853	0.233978	5.63526	1.75e-08	9.51e-08
LOC101927354	15.4542	1.31851	0.525433	2.50938	0.0120943	0.0257984
DBN1	439.454	1.31805	0.192802	6.83627	8.13e-12	6.82e-11
LOC100287036	38.7064	1.31753	0.452877	2.90925	0.00362297	0.00870212
C16orf54	14.9204	1.31729	0.570833	2.30766	0.0210183	0.0424819
MRPL12	369.905	1.31656	0.222283	5.92289	3.16e-09	1.91e-08
DENND2D	29.7176	1.31604	0.449894	2.92522	0.00344218	0.00830446
CALM3	2408.03	1.3154	0.160135	8.21434	2.13e-16	2.99e-15
CASC10	20.783	1.31533	0.502652	2.61678	0.00887641	0.0195336
LYRM4	1204	1.31488	0.142516	9.2262	2.8e-20	5.99e-19
DYNLL2	144.007	1.31487	0.302634	4.34476	1.39e-05	5.1e-05
SUN2	557.585	1.31477	0.197101	6.67055	2.55e-11	2e-10
NOP9	58.2038	1.31446	0.335939	3.91279	9.12e-05	0.000293453
PHF23	620.523	1.3142	0.210753	6.23572	4.5e-10	3.03e-09
RNF25	324.762	1.31364	0.325955	4.03012	5.57e-05	0.000185793
AK2	2966.89	1.31305	0.140163	9.36803	7.39e-21	1.65e-19
AIP	1300.44	1.31275	0.177031	7.41533	1.21e-13	1.26e-12
RPS11	5061.73	1.31268	0.163711	8.01827	1.07e-15	1.39e-14
NAP1L4	2984.63	1.31266	0.172595	7.60543	2.84e-14	3.18e-13
STK16	308.887	1.31249	0.294605	4.45508	8.39e-06	3.16e-05
RPL41	6737.03	1.31231	0.231209	5.67585	1.38e-08	7.59e-08
DISP2	76.1312	1.31219	0.354215	3.7045	0.000211809	0.000638344
UBE2M	1069	1.31211	0.227147	5.7765	7.63e-09	4.34e-08
BRD8	2729.53	1.31204	0.157129	8.35006	6.82e-17	1.01e-15
LOC400684	117.552	1.31166	0.306139	4.28453	1.83e-05	6.57e-05
TNK1	45.0436	1.31164	0.452579	2.89814	0.0037538	0.00898088
SON	11176.9	1.3111	0.197471	6.63945	3.15e-11	2.45e-10
LSP1	25.0606	1.31047	0.46632	2.81024	0.00495039	0.0115212
EML3	74.3325	1.31044	0.298669	4.38758	1.15e-05	4.24e-05
RPH3AL	506.468	1.31043	0.168237	7.78917	6.74e-15	8.06e-14
TTLL13	16.7051	1.31029	0.560715	2.33683	0.0194482	0.0396453
COMMD4	920.029	1.31012	0.167416	7.82551	5.06e-15	6.14e-14
LOC100505622	59.3588	1.30984	0.384163	3.40961	0.000650564	0.00179394
DALRD3	182.089	1.30929	0.309611	4.22883	2.35e-05	8.31e-05
WDR5	1215.16	1.30926	0.150638	8.69142	3.58e-18	6.09e-17
B3GALT6	264.274	1.30925	0.236175	5.54357	2.96e-08	1.55e-07
BUD31	460.085	1.30893	0.206887	6.3268	2.5e-10	1.74e-09
DPM2	1619.33	1.30873	0.211461	6.18899	6.06e-10	4.01e-09
CBX7	108.581	1.30802	0.270626	4.8333	1.34e-06	5.66e-06
TNFSF4	222.113	1.30777	0.344275	3.79863	0.000145499	0.000449819
TMEM179B	3363.08	1.30728	0.188748	6.92607	4.33e-12	3.76e-11
CCNL2	1516.58	1.30698	0.189017	6.91459	4.69e-12	4.06e-11
DOLPP1	537.641	1.30325	0.196543	6.63087	3.34e-11	2.59e-10
UBE2J2	782.469	1.30287	0.175857	7.4087	1.28e-13	1.32e-12
DEDD2	354.87	1.30287	0.238531	5.46207	4.71e-08	2.4e-07
TTLL12	345.74	1.302	0.227743	5.71696	1.08e-08	6.05e-08
PODNL1	15.1275	1.30161	0.548232	2.3742	0.0175872	0.0362025
UBN1	1224.48	1.30144	0.200271	6.49837	8.12e-11	5.97e-10
FBXL7	54.9458	1.3012	0.355908	3.65599	0.000256187	0.000762152
HLA-A	3931.07	1.30069	0.151702	8.57395	1e-17	1.62e-16
PRDX4	2187.14	1.30019	0.138863	9.36311	7.74e-21	1.73e-19
RBM10	245.4	1.2999	0.235109	5.52894	3.22e-08	1.68e-07
GALNT18	22.1225	1.29912	0.465453	2.79109	0.00525316	0.01215
BRPF1	395.426	1.29869	0.216272	6.00491	1.91e-09	1.19e-08
STK25	383.539	1.29843	0.195972	6.62558	3.46e-11	2.68e-10
OSMR-AS1	40.9825	1.2984	0.425648	3.0504	0.00228538	0.00572041
SEMA4G	20.589	1.29839	0.535338	2.42536	0.0152931	0.0319249
GTF3A	2926.78	1.29828	0.185765	6.98885	2.77e-12	2.47e-11
JRK	722.144	1.29827	0.235014	5.52421	3.31e-08	1.72e-07
IL15	290.165	1.29815	0.248294	5.22828	1.71e-07	8.13e-07
DGUOK-AS1	39.2321	1.29571	0.366135	3.5389	0.000401798	0.0011515
SLC23A3	20.0298	1.29567	0.548705	2.36133	0.0182096	0.0373759
LGALS3	3659.47	1.29566	0.233047	5.55964	2.7e-08	1.43e-07
DSCR9	18.8629	1.29556	0.518203	2.50011	0.0124154	0.0264148
PHKG2	286.785	1.29555	0.240704	5.38232	7.35e-08	3.67e-07
HS6ST1	83.0198	1.29545	0.310692	4.16957	3.05e-05	0.00010617
SNPH	37.085	1.2951	0.453589	2.85524	0.00430043	0.0101496
TSEN54	351.791	1.29499	0.246857	5.24593	1.55e-07	7.44e-07
B4GALNT4	37.0764	1.29478	0.498049	2.59971	0.0093302	0.0204172
SFT2D2	211.139	1.29476	0.235896	5.48868	4.05e-08	2.08e-07
COMMD6	2385.81	1.29466	0.202139	6.40482	1.51e-10	1.08e-09
HAGHL	16.6632	1.29466	0.51705	2.50393	0.0122821	0.0261685
DGCR8	207.763	1.29433	0.231711	5.58594	2.32e-08	1.24e-07
C19orf24	244.452	1.29369	0.184538	7.01047	2.38e-12	2.13e-11
TUBGCP2	675.229	1.2934	0.196045	6.59747	4.18e-11	3.2e-10
COX4I1	5367.5	1.2929	0.152051	8.50308	1.85e-17	2.91e-16
TOR3A	621.878	1.29265	0.220216	5.86991	4.36e-09	2.58e-08
TMEM9	813.67	1.29261	0.201097	6.42782	1.29e-10	9.3e-10
DHRS4L1	27.0924	1.2924	0.453857	2.84759	0.00440518	0.0103715
ZNF35	209.534	1.29239	0.254449	5.07917	3.79e-07	1.72e-06
LPCAT1	343.624	1.29202	0.2245	5.75509	8.66e-09	4.9e-08
TRIM11	339.868	1.29153	0.196099	6.58613	4.51e-11	3.44e-10
RNPEPL1	61.8367	1.29124	0.35287	3.65925	0.000252958	0.000752954
CIAPIN1	1650.08	1.29122	0.202754	6.36838	1.91e-10	1.35e-09
INTS1	112.7	1.29101	0.271043	4.76313	1.91e-06	7.9e-06
FAM213B	122.113	1.29089	0.255622	5.05001	4.42e-07	1.99e-06
REXO4	256.938	1.2908	0.247826	5.20848	1.9e-07	9e-07
WASF2	5237	1.29	0.140127	9.20591	3.39e-20	7.18e-19
SCAF1	104.023	1.28997	0.265132	4.8654	1.14e-06	4.87e-06
WDR62	214.298	1.28992	0.255727	5.04412	4.56e-07	2.04e-06
YIPF2	501	1.28887	0.231186	5.57502	2.47e-08	1.32e-07
C1orf123	1002.13	1.28839	0.187477	6.87225	6.32e-12	5.39e-11
TADA2B	302.19	1.28784	0.196799	6.54393	5.99e-11	4.48e-10
MRPS21	1207.11	1.28624	0.163009	7.89063	3.01e-15	3.72e-14
B9D2	162.282	1.28602	0.230943	5.56855	2.57e-08	1.37e-07
LAMTOR5	9946.64	1.28597	0.123211	10.4371	1.68e-25	6.11e-24
TMEM110	258.249	1.28582	0.260482	4.93629	7.96e-07	3.47e-06
ROR1	687.716	1.28569	0.201509	6.38034	1.77e-10	1.25e-09
HSF1	230.27	1.28519	0.255386	5.03236	4.84e-07	2.17e-06
VPS11	240.515	1.28498	0.214158	6.00015	1.97e-09	1.22e-08
MDGA2	16.7826	1.28384	0.526445	2.43869	0.0147407	0.0308893
B4GALT3	707.007	1.28319	0.166435	7.70981	1.26e-14	1.47e-13
TROAP	826.167	1.28306	0.159792	8.02957	9.78e-16	1.28e-14
ZNF607	52.0483	1.28188	0.49564	2.58632	0.00970063	0.0211545
ATG13	755.437	1.28151	0.172268	7.43906	1.01e-13	1.06e-12
FAM131A	212.422	1.28146	0.230596	5.55715	2.74e-08	1.45e-07
UROD	3062.96	1.28119	0.186532	6.86846	6.49e-12	5.52e-11
AHNAK	5376.13	1.28083	0.199665	6.41487	1.41e-10	1.01e-09
RAD23A	3943.67	1.28015	0.167506	7.64241	2.13e-14	2.43e-13
LINC00673	414.919	1.27995	0.218508	5.85768	4.69e-09	2.76e-08
ADCK5	30.2555	1.27917	0.468081	2.73281	0.00627975	0.014269
FIZ1	195.679	1.27886	0.222702	5.74246	9.33e-09	5.25e-08
LSS	292.631	1.278	0.202497	6.31119	2.77e-10	1.92e-09
FUK	49.4255	1.2776	0.469985	2.71839	0.00656003	0.0148463
TENC1	127.871	1.27729	0.285186	4.4788	7.51e-06	2.85e-05
OGFOD3	321.953	1.27725	0.206177	6.19495	5.83e-10	3.87e-09
TUSC2	847.15	1.27648	0.186273	6.85275	7.24e-12	6.12e-11
MRPS18B	4989.33	1.27581	0.147375	8.65692	4.85e-18	8.12e-17
POLDIP2	1389.33	1.27579	0.200113	6.37531	1.83e-10	1.29e-09
CBX2	144.804	1.27486	0.264304	4.82347	1.41e-06	5.93e-06
ELMOD3	300.748	1.27421	0.231733	5.49858	3.83e-08	1.97e-07
KCTD17	33.3857	1.27374	0.439421	2.89869	0.00374729	0.00897053
PPRC1	896.322	1.27276	0.155335	8.1937	2.53e-16	3.53e-15
GCAT	74.5986	1.27266	0.43184	2.94707	0.00320796	0.00779314
ZNF593	394.706	1.27258	0.203151	6.26422	3.75e-10	2.55e-09
DUSP1	1862.34	1.27222	0.180078	7.06483	1.61e-12	1.48e-11
HIST1H3H	68.8445	1.27039	0.319534	3.97575	7.02e-05	0.000229844
AMH	40.9186	1.27032	0.387788	3.2758	0.00105363	0.00280273
HIST1H4B	17.8908	1.26993	0.530834	2.39234	0.0167415	0.0345961
FAM64A	783.509	1.26962	0.184931	6.86539	6.63e-12	5.63e-11
ARHGAP1	1198.69	1.2692	0.169629	7.48219	7.31e-14	7.78e-13
SLMO1	56.2826	1.26902	0.391648	3.24022	0.00119438	0.00314705
NCLN	409.847	1.26862	0.235444	5.38819	7.12e-08	3.55e-07
PHGDH	327.266	1.26821	0.267172	4.74679	2.07e-06	8.52e-06
GMEB2	442.175	1.26629	0.200236	6.32401	2.55e-10	1.77e-09
LRCH4	62.2413	1.26601	0.411829	3.07411	0.00211129	0.00532201
EIF3B	2283.27	1.26567	0.197163	6.41938	1.37e-10	9.81e-10
SIRT6	193.928	1.26454	0.226304	5.58777	2.3e-08	1.23e-07
IFRD2	597.561	1.26253	0.469343	2.68999	0.00714536	0.0160273
DCLK2	283.839	1.26234	0.216411	5.83306	5.44e-09	3.17e-08
TMEM258	3205.22	1.26156	0.197745	6.37973	1.77e-10	1.26e-09
PKN1	608.988	1.25983	0.187427	6.72171	1.8e-11	1.44e-10
UNC119	202.036	1.25923	0.234961	5.35934	8.35e-08	4.13e-07
NUDT17	48.4701	1.25905	0.454905	2.76771	0.00564512	0.0129453
PPP2R5D	745.345	1.25893	0.205505	6.12602	9.01e-10	5.83e-09
ECI1	268.032	1.25796	0.250325	5.02533	5.03e-07	2.24e-06
MON1A	226.629	1.25766	0.350059	3.5927	0.000327263	0.000953719
VASN	74.6961	1.25748	0.321005	3.91731	8.95e-05	0.000288632
HIGD2A	2884.06	1.25736	0.142735	8.80903	1.26e-18	2.23e-17
ERAL1	1421.05	1.25668	0.211737	5.9351	2.94e-09	1.79e-08
PTRH2	3783.61	1.25596	0.165037	7.61015	2.74e-14	3.08e-13
PNKP	384.969	1.2559	0.198423	6.32942	2.46e-10	1.71e-09
NISCH	413.245	1.25587	0.213454	5.88358	4.01e-09	2.39e-08
PHYHD1	734.027	1.25567	0.175433	7.15754	8.21e-13	7.85e-12
SELO	119.069	1.25516	0.329237	3.81232	0.000137666	0.000426891
YARS	1162.64	1.25492	0.151818	8.26599	1.39e-16	1.98e-15
FAM65A	448.68	1.25477	0.175686	7.14212	9.19e-13	8.72e-12
DNAJC15	6264.76	1.25455	0.1605	7.81654	5.43e-15	6.57e-14
HIST1H2BB	30.3516	1.25445	0.440158	2.85	0.00437198	0.0103036
CHPF2	77.5983	1.25423	0.445311	2.81652	0.00485465	0.0113289
SLC27A5	108.476	1.25388	0.257634	4.8669	1.13e-06	4.84e-06
C6orf147	191.528	1.25379	0.205606	6.09801	1.07e-09	6.89e-09
RPL15	33189.5	1.25299	0.140934	8.89063	6.08e-19	1.12e-17
PTPRU	168.97	1.25264	0.252832	4.95442	7.25e-07	3.17e-06
MORN3	17.1732	1.2514	0.509648	2.45543	0.0140718	0.029639
VPS4A	568.118	1.25016	0.193328	6.46651	1e-10	7.28e-10
CHCHD1	2468.68	1.25014	0.158418	7.8914	2.99e-15	3.7e-14
ZNF628	22.3349	1.25013	0.50105	2.49502	0.0125948	0.0267479
RAB20	83.6691	1.24979	0.352601	3.5445	0.000393353	0.00112967
TXNRD2	148.673	1.24973	0.318878	3.91915	8.89e-05	0.000286658
PWP2	312.035	1.24966	0.243142	5.13965	2.75e-07	1.27e-06
PACS2	251.458	1.24902	0.265878	4.69773	2.63e-06	1.07e-05
PPP6R1	228.86	1.24889	0.280522	4.45203	8.51e-06	3.2e-05
ITM2C	434.756	1.24868	0.213717	5.84267	5.14e-09	3.01e-08
CTNNBIP1	261.367	1.24865	0.217354	5.7448	9.2e-09	5.18e-08
HSBP1	7093.71	1.24855	0.129623	9.63214	5.85e-22	1.44e-20
SNRPA	720.891	1.24801	0.291288	4.28446	1.83e-05	6.57e-05
HDAC7	431.56	1.24787	0.19799	6.30269	2.93e-10	2.02e-09
NDUFA3	630.092	1.2475	0.21943	5.68517	1.31e-08	7.21e-08
C6orf226	523.888	1.24713	0.163813	7.61318	2.67e-14	3.01e-13
ALDH16A1	204.125	1.2469	0.210804	5.91495	3.32e-09	2e-08
LRSAM1	180.304	1.24653	0.257955	4.83235	1.35e-06	5.69e-06
ROBO3	153.809	1.24642	0.246886	5.04856	4.45e-07	2e-06
UBXN11	79.8371	1.2464	0.307133	4.05816	4.95e-05	0.000166206
OST4	1445.5	1.24617	0.211536	5.89104	3.84e-09	2.29e-08
TOM1L2	378.278	1.24569	0.197698	6.30094	2.96e-10	2.04e-09
MOGS	661.907	1.24508	0.214334	5.80906	6.28e-09	3.62e-08
CLN6	296.21	1.24503	0.181256	6.86886	6.47e-12	5.51e-11
KLF13	607.432	1.24456	0.186552	6.67142	2.53e-11	1.99e-10
NRG1	848.423	1.24436	0.181275	6.86448	6.67e-12	5.67e-11
CCNO	116.985	1.24394	0.32126	3.87207	0.000107915	0.000342265
MGP	20.9256	1.24371	0.488445	2.54627	0.010888	0.0234864
EGFLAM	11.4887	1.2433	0.554872	2.24069	0.0250462	0.0496327
TRIM16	310.693	1.24322	0.215633	5.76545	8.14e-09	4.62e-08
CARD14	25.0712	1.24298	0.447409	2.77817	0.00546663	0.012587
FBXW4P1	47.8953	1.24255	0.449369	2.76509	0.00569066	0.013042
TMCC1-AS1	50.2246	1.24178	0.352276	3.52502	0.000423443	0.001207
TICAM1	76.1216	1.24166	0.36713	3.38207	0.00071943	0.00197191
VSIG2	79.2735	1.24154	0.341386	3.63677	0.00027608	0.000815861
USP20	54.1781	1.24023	0.417939	2.96749	0.00300242	0.00733618
DAGLB	310.376	1.23992	0.188173	6.58926	4.42e-11	3.38e-10
C1orf35	713.972	1.23985	0.196931	6.29586	3.06e-10	2.1e-09
EMG1	2293.71	1.2396	0.135927	9.11961	7.54e-20	1.53e-18
NOL4L	398.513	1.23922	0.174648	7.09553	1.29e-12	1.2e-11
EHBP1L1	175.85	1.23878	0.30375	4.07827	4.54e-05	0.000153546
SNX33	95.0241	1.23867	0.267515	4.63027	3.65e-06	1.45e-05
TIMM10B	880.042	1.23846	0.164606	7.5238	5.32e-14	5.76e-13
METTL7B	48.4875	1.2384	0.403469	3.06937	0.00214508	0.00539972
PMS2P1	533.402	1.23834	0.163685	7.56537	3.87e-14	4.26e-13
TEF	89.3358	1.23755	0.346	3.57674	0.000347907	0.00100797
RNF7	3985.03	1.23685	0.125072	9.88907	4.64e-23	1.3e-21
POLR1A	347.536	1.23675	0.177005	6.98709	2.81e-12	2.49e-11
SALL2	24.6868	1.23665	0.489821	2.52469	0.0115799	0.0248303
TP53I3	341.035	1.23661	0.279942	4.41737	9.99e-06	3.72e-05
CTSD	2799.59	1.23554	0.272328	4.53697	5.71e-06	2.21e-05
KLHL18	616.904	1.23503	0.248122	4.97751	6.44e-07	2.84e-06
MRPL34	3907.68	1.23445	0.179729	6.8684	6.49e-12	5.52e-11
RNF31	441.358	1.23409	0.216358	5.70393	1.17e-08	6.5e-08
ERF	183.613	1.23384	0.25775	4.78694	1.69e-06	7.05e-06
GUCD1	615.199	1.2335	0.173764	7.09875	1.26e-12	1.17e-11
POLG	176.835	1.23275	0.282536	4.36315	1.28e-05	4.71e-05
HID1	38.0395	1.23249	0.412833	2.98544	0.0028317	0.00695528
PDXP	667.947	1.23221	0.198154	6.21847	5.02e-10	3.36e-09
ARPC4	1606.59	1.23192	0.226603	5.43647	5.43e-08	2.75e-07
ZNF250	259.796	1.23184	0.25639	4.80454	1.55e-06	6.49e-06
JADE2	846.029	1.23166	0.180088	6.83922	7.96e-12	6.69e-11
NFKBIL1	150.511	1.23103	0.283138	4.34782	1.37e-05	5.03e-05
SLC35F3	233.169	1.23067	0.220096	5.59151	2.25e-08	1.21e-07
CTC-338M12.4	216.388	1.22935	0.203468	6.04199	1.52e-09	9.56e-09
RPL30	4892.71	1.22907	0.225947	5.43963	5.34e-08	2.71e-07
ZNF771	59.4003	1.22879	0.316028	3.88825	0.000100971	0.000321986
SNHG17	913.098	1.2287	0.163745	7.50374	6.2e-14	6.67e-13
RPLP2	2808.66	1.22865	0.228458	5.37801	7.53e-08	3.75e-07
RPS6	12548.2	1.22853	0.141626	8.67451	4.15e-18	6.99e-17
ARHGAP10	251.503	1.22847	0.18819	6.5278	6.67e-11	4.96e-10
RUSC2	285.193	1.2282	0.237397	5.17361	2.3e-07	1.07e-06
HSF4	74.3656	1.2275	0.330614	3.71278	0.000204996	0.000619291
METTL22	232.341	1.22714	0.244821	5.01238	5.38e-07	2.4e-06
EIF4E2	2286.92	1.22703	0.150849	8.13415	4.15e-16	5.67e-15
EEF1G	5376.44	1.22697	0.148814	8.24495	1.65e-16	2.34e-15
ENO3	293.676	1.22646	0.205672	5.96318	2.47e-09	1.52e-08
ZDHHC8	138.719	1.2264	0.277194	4.42433	9.67e-06	3.61e-05
LOC100289230	123.778	1.22623	0.267212	4.58898	4.45e-06	1.76e-05
DTX2P1-UPK3BP1-PMS2P11	46.6166	1.22609	0.374068	3.27771	0.00104654	0.00278522
SNORA77	29.3869	1.22587	0.451745	2.71363	0.00665497	0.0150466
HMHA1	41.1352	1.22424	0.428056	2.85999	0.00423651	0.0100131
H2AFZ	53120.9	1.22392	0.171843	7.12228	1.06e-12	1e-11
UQCRC1	1927.11	1.22374	0.256744	4.7664	1.88e-06	7.79e-06
ARHGDIA	1783.56	1.22364	0.211555	5.784	7.29e-09	4.16e-08
RPL37	5537.75	1.22341	0.240581	5.08523	3.67e-07	1.67e-06
ZNF658	31.4438	1.22324	0.540992	2.2611	0.0237531	0.0473964
STMN3	53.043	1.22253	0.389763	3.1366	0.0017092	0.00438249
SUFU	466.262	1.22252	0.196313	6.2274	4.74e-10	3.19e-09
NLRC5	142.856	1.22196	0.256077	4.77184	1.83e-06	7.59e-06
RAE1	2440.71	1.22149	0.221725	5.50903	3.61e-08	1.87e-07
KNOP1	663.621	1.22145	0.154852	7.88788	3.07e-15	3.8e-14
S100A3	534.021	1.22094	0.176264	6.92675	4.31e-12	3.75e-11
CLCF1	476.699	1.22047	0.209091	5.83701	5.31e-09	3.1e-08
ZBTB7A	560.563	1.21905	0.159601	7.63809	2.2e-14	2.51e-13
BET1L	384.826	1.2186	0.208914	5.83301	5.44e-09	3.17e-08
NDUFAF2	1965.56	1.21801	0.154055	7.90635	2.65e-15	3.32e-14
RANBP3	241.02	1.21775	0.199456	6.10535	1.03e-09	6.6e-09
NME1	1567	1.21748	0.127688	9.53483	1.5e-21	3.56e-20
CBX6	452.866	1.21715	0.193732	6.28267	3.33e-10	2.28e-09
MRPS11	965.992	1.21699	0.198991	6.11579	9.61e-10	6.19e-09
CDK11A	57.5042	1.21697	0.335856	3.6235	0.000290643	0.000855968
CDC42BPB	472.161	1.21673	0.21031	5.78538	7.23e-09	4.14e-08
TMEM63A	211.331	1.21625	0.215638	5.64026	1.7e-08	9.24e-08
ME3	446.504	1.21581	0.210191	5.78431	7.28e-09	4.16e-08
FANCE	1231.39	1.21565	0.204074	5.9569	2.57e-09	1.57e-08
ZSWIM8	193.317	1.21549	0.318345	3.81816	0.000134452	0.000417712
AMBRA1	179.369	1.21533	0.212875	5.70913	1.14e-08	6.32e-08
ARRB1	174.365	1.21382	0.256591	4.73056	2.24e-06	9.19e-06
LRRC20	139.076	1.21379	0.341846	3.55071	0.0003842	0.0011057
ATP5I	1231.43	1.21316	0.397472	3.05219	0.0022718	0.00569076
WDR13	248.293	1.21268	0.24815	4.88688	1.02e-06	4.39e-06
TMEM163	1015.06	1.21198	0.171888	7.05101	1.78e-12	1.62e-11
SNORD99	24.0115	1.21094	0.451533	2.68184	0.00732184	0.0163783
TMEM92	459.73	1.20991	0.195738	6.18127	6.36e-10	4.19e-09
STON2	25.7656	1.20982	0.522682	2.31463	0.020633	0.0417598
SPHK2	289.681	1.2097	0.199152	6.07424	1.25e-09	7.92e-09
CACTIN	63.2563	1.20883	0.330198	3.66093	0.000251305	0.000748171
NR1H3	43.2329	1.20856	0.42574	2.83872	0.00452944	0.010635
MPDU1	700.464	1.20811	0.210222	5.74684	9.09e-09	5.13e-08
TMEM171	3177.58	1.20762	0.25416	4.75141	2.02e-06	8.34e-06
RFESD	148.823	1.20712	0.244647	4.93415	8.05e-07	3.5e-06
CLCN7	105.339	1.2059	0.339236	3.55474	0.00037835	0.00109116
BCL7C	94.3244	1.20457	0.291249	4.13588	3.54e-05	0.000121747
RPS26	3636.18	1.20451	0.224538	5.36439	8.12e-08	4.02e-07
DCAF4	268.739	1.20444	0.222794	5.40606	6.44e-08	3.24e-07
ZNF324	153.53	1.20437	0.281216	4.28271	1.85e-05	6.62e-05
NEIL2	126.584	1.20433	0.350219	3.43878	0.000584331	0.00162496
TRIB3	271.777	1.20402	0.254183	4.73683	2.17e-06	8.92e-06
ATG101	748.767	1.20354	0.20027	6.00959	1.86e-09	1.16e-08
AKR1C3	361.53	1.20267	0.316842	3.79582	0.000147158	0.000454521
TSPAN5	1885.52	1.20205	0.149531	8.03882	9.07e-16	1.19e-14
PRR12	62.9242	1.20197	0.337614	3.56018	0.000370598	0.00106975
B9D1	78.3362	1.20177	0.33213	3.61836	0.000296479	0.000870966
ATPAF2	183.792	1.20169	0.293076	4.10026	4.13e-05	0.000140649
MGC16275	58.0357	1.20132	0.408981	2.93736	0.00331022	0.00802019
LOC644919	125.72	1.20132	0.247585	4.85214	1.22e-06	5.19e-06
NIT1	184.594	1.20117	0.349215	3.43963	0.000582505	0.00162043
URGCP	189.562	1.20078	0.234082	5.12974	2.9e-07	1.34e-06
GTF2IRD1	180.178	1.20042	0.309044	3.88431	0.000102623	0.000326871
ICAM3	105.239	1.20036	0.323874	3.70627	0.000210334	0.000634366
AARD	67.8566	1.20021	0.331548	3.62001	0.000294589	0.000866036
DNAL4	65.0717	1.20019	0.355541	3.37567	0.000736374	0.00201465
EEPD1	21.4688	1.20009	0.499696	2.40165	0.0163213	0.0338446
MFSD5	1461.52	1.19971	0.165811	7.2354	4.64e-13	4.57e-12
USP40	1016.55	1.19947	0.194492	6.1672	6.95e-10	4.56e-09
AP2M1	1687.59	1.19883	0.180559	6.63956	3.15e-11	2.45e-10
SYNE3	32.5091	1.19859	0.460403	2.60335	0.00923186	0.0202182
PMF1	199.631	1.19847	0.232814	5.14777	2.64e-07	1.22e-06
KIAA0319L	745.965	1.19839	0.222367	5.38923	7.08e-08	3.54e-07
DNM2	541.746	1.19794	0.184585	6.48994	8.59e-11	6.29e-10
LSM4	4326.3	1.19761	0.145351	8.23939	1.73e-16	2.44e-15
TSPO	1204.08	1.19747	0.18101	6.61553	3.7e-11	2.86e-10
MICALL1	238.897	1.19674	0.21388	5.59539	2.2e-08	1.18e-07
TBXAS1	101.665	1.19673	0.283073	4.22762	2.36e-05	8.35e-05
DYRK1B	40.9561	1.19614	0.47475	2.51952	0.0117513	0.025165
PI4KA	215.178	1.19609	0.302901	3.94879	7.85e-05	0.000255395
LOC642846	107.914	1.19543	0.256393	4.66249	3.12e-06	1.25e-05
TGFB1I1	301.236	1.19475	0.226291	5.27969	1.29e-07	6.25e-07
PRKAB1	489.405	1.19445	0.240781	4.96072	7.02e-07	3.08e-06
RPL22L1	1088.81	1.19371	0.247765	4.81793	1.45e-06	6.09e-06
FAM110A	134.509	1.1936	0.253557	4.70744	2.51e-06	1.02e-05
RNASEH2C	303.369	1.19308	0.258015	4.62408	3.76e-06	1.5e-05
AP3D1	693.921	1.19274	0.162975	7.31857	2.51e-13	2.53e-12
MRPL16	2297.32	1.19256	0.198569	6.00575	1.9e-09	1.18e-08
SLC37A4	406.743	1.19127	0.219101	5.43705	5.42e-08	2.74e-07
SLC25A4	2066.82	1.19098	0.221703	5.37196	7.79e-08	3.87e-07
ADAMTS17	27.3086	1.18998	0.451845	2.63361	0.00844827	0.0186565
TXN	24684	1.18979	0.188072	6.32626	2.51e-10	1.74e-09
ATP5SL	897.771	1.18939	0.209107	5.68795	1.29e-08	7.1e-08
KBTBD4	52.1676	1.18926	0.417196	2.85061	0.0043635	0.0102851
TM7SF2	80.8727	1.18921	0.316184	3.76114	0.000169138	0.000517537
PKP3	53.9463	1.18834	0.359193	3.30837	0.000938407	0.00251334
TAGLN	53.0077	1.18813	0.326335	3.64082	0.000271767	0.000804418
MGLL	1693.82	1.1881	0.212896	5.58064	2.4e-08	1.28e-07
KIF2C	2776.27	1.18788	0.22589	5.25867	1.45e-07	6.97e-07
CCDC12	3620.07	1.18711	0.187561	6.32917	2.46e-10	1.72e-09
TSSC1	610.801	1.18683	0.174492	6.80164	1.03e-11	8.54e-11
C14orf119	3821.43	1.1865	0.234682	5.05576	4.29e-07	1.93e-06
IGSF8	53.8984	1.18614	0.358728	3.30651	0.000944667	0.00252887
SPTAN1	926.897	1.18593	0.154814	7.66035	1.85e-14	2.13e-13
SNRPG	29434.1	1.18503	0.152206	7.78566	6.94e-15	8.28e-14
TIPARP-AS1	23.3813	1.18422	0.502767	2.3554	0.018503	0.0379069
POR	79.7216	1.18382	0.381001	3.10712	0.00188921	0.00480799
LINC00926	43.9891	1.18375	0.400173	2.95809	0.00309552	0.00754456
MAF1	1872.95	1.18354	0.201341	5.87828	4.15e-09	2.46e-08
SLC35C1	136.315	1.18345	0.276595	4.27863	1.88e-05	6.73e-05
NDUFA8	1609.91	1.18226	0.176447	6.70036	2.08e-11	1.65e-10
WDR74	500.59	1.18155	0.21337	5.53756	3.07e-08	1.6e-07
TOP3B	59.0747	1.18145	0.393366	3.00345	0.00266941	0.00659614
PMPCA	345.719	1.18138	0.207506	5.69327	1.25e-08	6.89e-08
THAP8	60.0331	1.18124	0.351083	3.36455	0.000766679	0.00208921
PBX4	88.3314	1.18099	0.276663	4.26871	1.97e-05	7.02e-05
IER5	1482.67	1.17901	0.194826	6.05163	1.43e-09	9.02e-09
TCF25	835.036	1.17878	0.170917	6.89679	5.32e-12	4.57e-11
LINC00341	195.477	1.17858	0.233336	5.05098	4.4e-07	1.98e-06
BIN3	180.552	1.17839	0.33244	3.54467	0.000393106	0.00112916
B3GAT3	194.408	1.17745	0.25371	4.64095	3.47e-06	1.39e-05
ITPRIP	780.524	1.17729	0.154023	7.64363	2.11e-14	2.41e-13
NDUFV2	8814.14	1.17625	0.145443	8.08736	6.1e-16	8.18e-15
SERPINF1	527.012	1.17606	0.318278	3.69508	0.000219815	0.000660532
NR1H2	267.673	1.17599	0.329416	3.56991	0.0003571	0.00103333
WWOX	118.971	1.17595	0.291576	4.03307	5.51e-05	0.000183551
NOC4L	196.448	1.17554	0.284465	4.13247	3.59e-05	0.000123466
PISD	238.952	1.17547	0.273029	4.30529	1.67e-05	6.01e-05
C21orf119	250.422	1.17503	0.235752	4.98417	6.22e-07	2.75e-06
TMCO6	213.899	1.17501	0.227357	5.16814	2.36e-07	1.1e-06
IRF2BP1	68.4968	1.17279	0.376456	3.11533	0.00183738	0.004687
CDK4	3012.23	1.1711	0.156292	7.493	6.73e-14	7.22e-13
LPIN3	322.933	1.17107	0.227706	5.14289	2.71e-07	1.25e-06
TRAPPC2P1	1136.54	1.16933	0.170559	6.85591	7.09e-12	5.99e-11
ZNF7	414.308	1.16899	0.178976	6.53158	6.51e-11	4.85e-10
MRPL49	834.63	1.16829	0.248914	4.69353	2.69e-06	1.09e-05
RPL6	15072.2	1.16749	0.176943	6.59816	4.16e-11	3.19e-10
TNFRSF1A	1307.1	1.16697	0.136211	8.56734	1.06e-17	1.71e-16
FKBP11	175.911	1.16637	0.2215	5.26578	1.4e-07	6.72e-07
CAMTA2	368.361	1.16588	0.201054	5.79885	6.68e-09	3.84e-08
EXOSC1	1547.06	1.16484	0.170531	6.83068	8.45e-12	7.08e-11
DCTN3	1326.63	1.16443	0.153552	7.58333	3.37e-14	3.73e-13
NPR2	69.7257	1.16435	0.300647	3.87281	0.000107589	0.000341364
TMEM44	345.43	1.16428	0.24263	4.79859	1.6e-06	6.68e-06
HIST1H3B	54.6043	1.16389	0.348322	3.34143	0.00083348	0.00225402
TONSL	317.875	1.16344	0.212262	5.48115	4.23e-08	2.17e-07
KAT5	87.8777	1.16338	0.465134	2.50117	0.0123785	0.0263499
SEC24C	819.535	1.16328	0.192218	6.05187	1.43e-09	9.01e-09
MRM1	40.2526	1.16319	0.42851	2.71451	0.00663741	0.015011
ZZEF1	380.952	1.16255	0.236665	4.91223	9e-07	3.89e-06
TNIP2	542.47	1.16188	0.195223	5.95156	2.66e-09	1.62e-08
RPS17	66.782	1.16169	0.374444	3.10245	0.00191929	0.00487546
LINC01089	89.2363	1.16153	0.317083	3.66317	0.000249118	0.000742198
FOXN3-AS1	17.8631	1.16147	0.51093	2.27324	0.023012	0.0460632
CDK2AP2	2409.56	1.16125	0.178364	6.51055	7.49e-11	5.53e-10
S100A6	14395.4	1.15914	0.186143	6.22712	4.75e-10	3.19e-09
HGS	1120.5	1.1589	0.180065	6.43599	1.23e-10	8.83e-10
MOV10	218.204	1.15883	0.294938	3.92905	8.53e-05	0.000275922
TIMM22	1527.28	1.15786	0.238402	4.85675	1.19e-06	5.08e-06
C9orf116	83.1813	1.15775	0.370969	3.12089	0.00180304	0.0046044
MORN4	291.882	1.15755	0.200503	5.77322	7.78e-09	4.42e-08
PLEKHM1	216.357	1.15684	0.252721	4.57755	4.7e-06	1.84e-05
PXN-AS1	67.1434	1.15669	0.325902	3.5492	0.000386406	0.00111127
LOC100506844	264.625	1.15661	0.253656	4.55977	5.12e-06	2e-05
S1PR5	46.934	1.15622	0.449321	2.57325	0.0100749	0.021895
DNAJC5	2237.02	1.15606	0.161263	7.16879	7.57e-13	7.27e-12
CDKN1A	1206.5	1.15584	0.193246	5.98117	2.22e-09	1.37e-08
C5orf56	283.468	1.15582	0.23807	4.85497	1.2e-06	5.12e-06
DCAF11	305.298	1.15549	0.192491	6.00284	1.94e-09	1.2e-08
ITGB5	715.997	1.15471	0.205732	5.6127	1.99e-08	1.07e-07
GLIDR	196.814	1.1542	0.219963	5.24724	1.54e-07	7.39e-07
SNRPD2	5712.9	1.15373	0.173214	6.66074	2.72e-11	2.13e-10
PRR7-AS1	26.0065	1.15365	0.492214	2.34379	0.0190889	0.0389855
PHB2	1477.93	1.1534	0.186801	6.1745	6.64e-10	4.37e-09
RNASEH2A	2870.4	1.15336	0.205512	5.61212	2e-08	1.08e-07
ARRDC2	376.699	1.15303	0.206551	5.58229	2.37e-08	1.27e-07
FAHD1	1312.05	1.15284	0.195763	5.88898	3.89e-09	2.31e-08
ABCB6	69.5941	1.1527	0.368693	3.12646	0.00176927	0.00452591
BNIP1	748.627	1.15215	0.252776	4.55798	5.16e-06	2.01e-05
XYLB	145.209	1.15205	0.328605	3.50589	0.00045509	0.00128915
ABHD8	142.964	1.15197	0.355289	3.24233	0.00118556	0.0031258
CD83	460.295	1.15141	0.207517	5.54854	2.88e-08	1.51e-07
ELAC2	653.644	1.15103	0.167086	6.88885	5.62e-12	4.82e-11
ALAD	281.761	1.15053	0.216657	5.31038	1.09e-07	5.34e-07
TUFM	1174.92	1.1504	0.213808	5.38052	7.43e-08	3.7e-07
NINJ1	362.534	1.15003	0.448857	2.56212	0.0104034	0.0225344
DDX24	3994	1.14985	0.1376	8.35647	6.46e-17	9.55e-16
ING2	764.077	1.14968	0.17539	6.55497	5.57e-11	4.2e-10
YRDC	1462	1.14952	0.177001	6.49444	8.33e-11	6.12e-10
RBM19	288.868	1.14895	0.22287	5.15526	2.53e-07	1.18e-06
AIFM2	396.459	1.1488	0.227285	5.05443	4.32e-07	1.94e-06
SDF2	3335.11	1.14847	0.159192	7.21437	5.42e-13	5.27e-12
ZNF581	123.877	1.14693	0.369548	3.10361	0.00191178	0.00486015
EFCAB4A	50.7752	1.14655	0.344575	3.32743	0.000876501	0.00235793
LDLRAP1	134.064	1.1464	0.278694	4.11349	3.9e-05	0.000133266
POLR2E	921.03	1.14635	0.271252	4.22615	2.38e-05	8.4e-05
RELB	199.261	1.14623	0.225019	5.09392	3.51e-07	1.6e-06
PLEKHF1	17.0392	1.14604	0.501101	2.28704	0.0221937	0.044594
DIRAS3	49.0278	1.14587	0.458407	2.49967	0.0124309	0.0264407
IMPDH2	2056.35	1.14569	0.165565	6.91989	4.52e-12	3.92e-11
HSPB11	3245.1	1.14568	0.160531	7.1368	9.55e-13	9.05e-12
MED11	368.817	1.14563	0.192118	5.96318	2.47e-09	1.52e-08
XRCC6	5296.15	1.14558	0.161575	7.09011	1.34e-12	1.24e-11
TGFB2	503.273	1.14544	0.199459	5.74275	9.32e-09	5.25e-08
RCSD1	132.243	1.14498	0.306008	3.74168	0.000182796	0.000556733
ATP5G3	13611.4	1.14491	0.139819	8.18851	2.64e-16	3.67e-15
IMP3	3865.69	1.14456	0.144197	7.93748	2.06e-15	2.61e-14
RFXANK	161.019	1.14371	0.309491	3.69544	0.000219504	0.000659717
FBXW4	113.45	1.14347	0.27072	4.22379	2.4e-05	8.49e-05
PNPLA2	194.941	1.14335	0.249322	4.58583	4.52e-06	1.78e-05
THYN1	2145.57	1.14321	0.209657	5.45278	4.96e-08	2.52e-07
SUV420H2	35.9597	1.14284	0.420297	2.71913	0.00654532	0.0148186
ZNF528	231.483	1.1425	0.250679	4.55763	5.17e-06	2.02e-05
FAM95C	42.3241	1.14165	0.410826	2.77891	0.00545414	0.0125635
MFAP2	2129.76	1.14084	0.251907	4.52881	5.93e-06	2.29e-05
GIT1	406.688	1.14025	0.217382	5.24535	1.56e-07	7.46e-07
COA6	2048.62	1.13992	0.173991	6.5516	5.69e-11	4.28e-10
AIF1L	21.9304	1.13962	0.499678	2.2807	0.0225663	0.045265
ITGA10	2632.22	1.13961	0.154781	7.36276	1.8e-13	1.84e-12
[truncated: 2,626 more rows]
