# Supplementary material for: Flura-seq identifies organ-specific metabolic adaptations during early metastatic colonization
Source: eLife journal article supplement (doi:10.7554/elife.43627), 2019-03-25
Supplement: supp [file elife-43627-supp-v1.zip › elife_poa_e43627_Supplementary_File_4.xlsx]

## Sheet: NFE2L2_ChIP
HeLa_ChIP1	HeLa_ChIP2	NRF2_Signature genes
HSPA1B	LMNA	HSPA1B
HSPA1A	LOC101928136	HSPA1A
HSPA1L	DLGAP1-AS2	HSPA1L
HIST1H3B	LOC101928154	HIST1H3B
HIST1H4B	HIST1H4B	HIST1H4B
HIST1H2AB	DLGAP1-AS1	HIST1H2AB
DLGAP1-AS2	HIST1H3B	DLGAP1-AS2
HIST1H3C	MAFK	HIST1H3C
HIST1H2BB	MIR5188	HIST1H2BB
C6orf48	UBC	C6orf48
SNORD48	ARL4D	SNORD48
HIST1H4A	HIST1H2AB	HIST1H4A
HIST1H3A	HIST1H4A	HIST1H3A
LSM2	LINC00189	LSM2
VTRNA1-2	ANKZF1	VTRNA1-2
VTRNA1-3	ATG9A	HIST1H1C
GDF15	DDX47	FLYWCH1
MIR3189	HIST1H3A	HIST1H1A
SNORD52	HSPA1A	VTRNA1-1
MIR6723	HSPA1L	DLGAP1-AS1
HIST1H1C	HIST1H3C	LOC101928136
FLYWCH1	HIST1H2BB	FLYWCH2
YWHAG	APOLD1	WDR81
HIST1H1A	LINC00910	VARS
STX5	IER3
VTRNA1-1	FLYWCH2
RNU2-2P	HSPA1B
WDR74	LSM2
DLGAP1-AS1	LOC101927780
SLC33A1	TM4SF1-AS1
GANAB	TM4SF1
INTS5	PTP4A2
HIST1H2BK	FLOT1
HIST1H2AH	STK16
MIR3143	GLB1L
AKR1C2	HIST1H1A
ZBTB3	FLJ22447
NXF1	ABCB6
SLC7A11	SYVN1
HN1	SLC25A37
TMEM179B	HIST1H1C
CEP120	MIR4470
PPP1R3F	C7orf49
MIR6748	ASPH
PCYT1A	FAU
HIST1H4I	MRPL49
TMEM223	ERRFI1
CKS2	EIF5A
MIR6514	TUBA4B
KIAA0101	PLA2G6
TRIP4	LINC00917
TMEM167B	RPL13AP20
SNORD22	MIR6751
SNORD31	TUBA4A
SNORD30	AKR1B10
MIR3153	RALGDS
SNORD29	BDKRB1
HIST1H2AG	WBSCR27
AKR1C3	FAM83A
HIST1H2BJ	LOC731656
POLR2G	ZNHIT2
NQO2	MIR7155
LOC102288414	FLYWCH1
METTL12	TKT
SNORD28	CCDC88B
SNORA57	SEPSECS-AS1
PSMA3	SEPSECS
SNORD27	VARS
SNORD26	RAD23A
SNORD25	UGT1A5
SNHG1	PPP1R15B
SLC3A2	C6orf48
AMN1	GADD45GIP1
C16orf80	VTRNA1-1
SCARNA2	TMEM44-AS1
LOC101928136	TMEM184A
C11orf83	SNORD48
C11orf48	GSTM4
GMPS	TRIB3
B3GAT3	CHTOP
LINC00601	S100A13
FOXP3	H2AFX
DYNC1H1	MIR6515
FLYWCH2	AAAS
MAFG	MIR3163
WDR89	CALR
GADD45B	VTRNA1-2
HTATIP2	SULT2B1
MAFG-AS1	AHCYL1
TAF6L	EPS8L3
CLTC	MOGS
RNF14	INTS1
WDR81	MRPL53
OR8B3	ZMAT2
SERPINB5	HMBS
MIR22HG	UGT1A6
VARS	MIR200C
SQSTM1	GBA
CNOT3	WDR81
TAF13	GPS2
