# Supplementary material for: Flura-seq identifies organ-specific metabolic adaptations during early metastatic colonization
Source: eLife journal article supplement (doi:10.7554/elife.43627), 2019-03-25
Supplement: supp [file elife-43627-supp-v1.zip › elife_poa_e43627_Supplementary_File_5.xlsx]

## Sheet: Sheet1
Patients/Genes	A11 (34)	A12 (0)	A15 (1)	A1 (0)	A20 (32)	A26 (26)	A28 (32)	A2 (39)	A4 (6)	A7 (1)	A8 (0)
	AAAS	A2M	A1BG	A2ML1	A2M	A4GNT	A4GALT	A2M	A2ML1	A2M	A2ML1
	AAMP	AADAC	A2ML1	A2M	AAAS	AAAS	AAAS	A4GNT	A2M	AACS	A2M
	AARS2	AASS	A4GALT	AADAC	AACS	AADAT	AAMP	AAMP	AADAC	AANAT	A4GNT
	AARSD1	AATK	A4GNT	ABCA10	AAMP	AAMP	AARSD1	AARS	AATK	AATK	AANAT
	AARS	ABCA13	AAK1	ABCA6	AARS	AANAT	AARS	AASDHPPT	ABCA12	ABCA1	AARS
	AASDHPPT	ABCA1	AANAT	ABCA8	ABCG2	AARS2	AATF	AASDH	ABCA13	ABCC2	AASS
	AATF	ABCA4	AASDH	ABCA9	ABCG4	AARSD1	ABAT	AASS	ABCA3	ABCC9	ABCA12
	ABCA2	ABCA8	AASS	ABCB1	ABHD11	AATK	ABCA2	AATF	ABCA4	ACADL	ABCA17P
	ABCA3	ABCC3	ABAT	ABCB5	ABHD12	ABCA2	ABCA3	ABCA12	ABCA7	ACAN	ABCA6
	ABCA7	ABCC6P1	ABCA10	ABCC6P1	ABHD14A	ABCA7	ABCA7	ABCA13	ABCB9	ACCN1	ABCA8
	ABCB1	ABCC6	ABCA11P	ABCC6P2	ABHD14B	ABCB4	ABCB6	ABCA3	ABCC11	ACE	ABCA9
	ABCB4	ABCG5	ABCA12	ABCC6	ABLIM3	ABCB6	ABCB8	ABCA6	ABCC3	ACHE	ABCC11
	ABCB6	ABLIM2	ABCA13	ABCC8	ABTB1	ABCB8	ABCB9	ABCA8	ABCC6P1	ACSS2	ABCC9
	ABCD1	ABO	ABCA17P	ABCC9	ACAA1	ABCB9	ABCC11	ABCB10	ABCC6P2	ACVRL1	ABHD14B
	ABCF3	ABRA	ABCA1	ABCG2	ACADL	ABCC10	ABCC1	ABCB1	ABCC6	ADAM8	ABI3BP
	ABCG4	ACADVL	ABCA2	ABCG4	ACADS	ABCD1	ABCC5	ABCC11	ABCD1	ADAMTS18	ACADL
	ABHD11	ACAP1	ABCA3	ABHD12B	ACADVL	ABCD4	ABCC8	ABCC2	ABHD11	ADAMTS4	ACCN4
	ABHD12	ACER2	ABCA4	ABI3BP	ACAP3	ABCF3	ABCD1	ABCC4	ABHD12	ADAMTS9	ACCS
	ABHD14A	ACHE	ABCA6	ABI3	ACAT1	ABCG4	ABCD4	ABCC6P1	ABRA	ADAMTSL2	ACOT11
	ABHD14B	ACN9	ABCA8	ABLIM2	ACAT2	ABHD14A	ABCF3	ABCC6P2	ACACA	ADAMTSL5	ACOT6
	ABHD5	ACO1	ABCA9	ABLIM3	ACCN3	ABHD14B	ABCG1	ABCC9	ACADL	ADARB2	ACOXL
	ABHD6	ACOXL	ABCB1	ABO	ACCN4	ABHD4	ABCG4	ABCD4	ACAT2	ADCY10	ACP6
	ABHD8	ACSL1	ABCB4	ACAP1	ACD	ABHD8	ABHD11	ABCE1	ACBD7	ADM	ACRBP
	ABR	ACSL4	ABCB5	ACE	ACOT1	ABTB1	ABHD12	ABCF2	ACCN3	ADORA2A	ACRV1
	ABTB1	ACSL5	ABCB9	ACOT6	ACOT2	ABTB2	ABHD15	ABCF3	ACE2	ADORA2B	ACSBG2
	ACAA1	ACSL6	ABCC11	ACOX2	ACOT4	ACADVL	ABHD3	ABHD10	ACE	ADRA1D	ACSF3
	ACAA2	ACSM3	ABCC4	ACSM5	ACOT7	ACAN	ABHD4	ABHD11	ACHE	ADRA2B	ACSM3
	ACADL	ACTBL2	ABCC5	ACTG2	ACOT8	ACAP3	ABP1	ABHD12	ACOT4	AFAP1L1	ACSS3
	ACADS	ACTG2	ABCC6P1	ACVRL1	ACSF2	ACCN1	ABTB1	ABHD14B	ACOT6	AFF2	ACYP1
	ACADVL	ACTN2	ABCC8	ADAD2	ACSM3	ACCN2	ACAA1	ABHD3	ACOT7	AG2	ADAM20
	ACAT1	ACTN3	ABCC9	ADAM19	ACSS2	ACCN3	ACADS	ABHD4	ACOXL	AGAP2	ADAM21
	ACAT2	ADAD2	ABCD1	ADAM33	ACTG1	ACCN4	ACAN	ABHD8	ACP5	AGPAT2	ADAM33
	ACBD4	ADAM19	ABCD2	ADAM6	ACTG2	ACD	ACAP3	ABI1	ACP6	AHNAK2	ADAM6
	ACCN4	ADAM23	ABCG2	ADAM8	ACTL8	ACHE	ACBD4	ABI3BP	ACPP	AHSP	ADAMTS10
	ACD	ADAM6	ABCG4	ADAMDEC1	ACTR1B	ACN9	ACCN2	ABLIM1	ACSBG1	AIM1L	ADAMTS12
	ACN9	ADAM8	ABCG5	ADAMTS12	ACTR5	ACO2	ACCN3	ABLIM3	ACSF2	AK3L1	ADAMTS13
	ACO1	ADAMTS19	ABHD12B	ADAMTS14	ACTR6	ACOT11	ACCN4	ABO	ACSM3	AKR1B10	ADAMTS2
	ACO2	ADAMTS1	ABHD1	ADAMTS1	ACVRL1	ACOT1	ACD	ABTB1	ACSS2	ALAS2	ADAMTS3
	ACOT1	ADAMTS3	ABHD2	ADAMTS4	ACY1	ACOT4	ACE	ACAA1	ACTA1	ALDH3A2	ADAMTS8
	ACOT2	ADAMTS4	ABHD5	ADAMTS7	ACY3	ACPL2	ACHE	ACAA2	ACTC1	ALDOA	ADAMTSL4
	ACOT7	ADAMTS8	ABI2	ADAMTS8	ACYP1	ACRV1	ACIN1	ACADM	ACTG2	ALDOB	ADARB1
	ACRBP	ADAMTS9	ABI3BP	ADAMTS9	ACYP2	ACSBG1	ACLY	ACADVL	ACTL8	ALKBH6	ADCY10
	ACSL1	ADAMTSL4	ABL2	ADAMTSL1	ADAM11	ACSF2	ACO2	ACAP1	ACTN2	ALLC	ADCY5
	ACSS2	ADCY4	ABLIM2	ADAMTSL2	ADAM15	ACSF3	ACOT1	ACAT1	ACTN4	ALOX5AP	ADD2
	ACTG1	ADCYAP1	ABLIM3	ADAMTSL3	ADAM33	ACTA1	ACOT2	ACAT2	ACY1	ALOXE3	ADH1A
	ACTG2	ADD2	ABO	ADAMTSL4	ADAMTS8	ACTC1	ACOT4	ACBD5	ACY3	ALPK3	ADH1B
	ACTL6A	ADH1A	ABP1	ADAP2	ADAMTSL5	ACTG1	ACOT7	ACCN1	ADAM15	ALPL	ADH1C
	ACTN4	ADH1B	ABRA	ADARB2	ADAP1	ACTN2	ACOXL	ACD	ADAM8	ANGPT2	ADH4
	ACTR1A	ADH4	ABTB1	ADAT3	ADA	ACTN4	ACP2	ACE2	ADAMDEC1	ANGPTL4	ADH6
	ACTR1B	ADH6	ABTB2	ADA	ADCK1	ACTR1A	ACRBP	ACER2	ADAMTS17	ANKRD19	ADHFE1
	ACY1	ADM	ACACB	ADCY1	ADCK4	ACTR1B	ACSF2	ACE	ADAMTS19	ANKRD1	ADM
	ACY3	ADORA2B	ACADSB	ADCY4	ADCY4	ACY1	ACSL3	ACLY	ADAMTS8	ANKRD26P1	ADPRHL1
	ACYP1	ADRA1A	ACAN	ADCY5	ADH1A	ACYP1	ACTA1	ACN9	ADAMTSL2	ANKRD34B	ADRA2A
	ADAM15	ADRA2B	ACAP1	ADCYAP1	ADH1B	ADAD2	ACTG1	ACO2	ADAMTSL3	ANKRD37	ADRA2B
	ADAM23	ADRA2C	ACAP2	ADH1A	ADIPOR2	ADAM11	ACTL6A	ACOT1	ADAMTSL5	ANKRD56	ADSSL1
	ADAM9	AFARP1	ACBD7	ADH1B	ADM	ADAM15	ACTN3	ACOT2	ADAP1	ANKZF1	AEBP1
	ADAMTS13	AG2	ACCN1	ADH1C	ADPRHL2	ADAM33	ACTN4	ACOT4	ADARB2	ANO4	AFARP1
	ADA	AGBL2	ACCN2	ADORA2A	ADRA1D	ADAM8	ACTR10	ACOT9	ADAT3	ANXA1	AFG3L1
	ADCK2	AGER	ACCN3	ADORA3	ADRA2B	ADAMTS10	ACTR1A	ACOX2	ADCY2	ANXA2	AGAP11
	ADCY5	AGFG1	ACCN4	ADRA1A	ADRA2C	ADAMTS13	ACTR1B	ACOXL	ADIPOR1	ANXA3	AGER
	ADH5	AGPAT9	ACD	ADRA1B	ADRB1	ADAMTS14	ACTR5	ACP2	ADM2	ANXA5	AGTR1
	ADM	AGRP	ACER2	ADRA1D	ADRBK1	ADAMTS18	ACYP1	ACR	ADORA2A	AOC2	AGXT2L2
	ADPRHL2	AGTPBP1	ACER3	ADRA2C	ADRM1	ADAMTS2	ADAM15	ACSL1	ADORA2B	AOC3	AHNAK2
	ADRA1B	AHSP	ACE	ADRB1	ADSSL1	ADAMTS7	ADAM8	ACSL5	ADRA1A	AP1M2	AHSA2
	ADRA2B	AIRE	ACHE	AEBP1	AEN	ADAMTSL2	ADAMTS13	ACSM1	ADRB1	AP3S1	AHSP
	ADRA2C	AJAP1	ACOT11	AFAP1L1	AES	ADAP1	ADAMTS19	ACSS2	ADRM1	APBB3	AIRE
	ADRBK1	AK3L1	ACOT1	AFF3	AFMID	ADAT3	ADAMTS7	ACSS3	AFMID	APC2	AKD1
	ADRM1	AK7	ACOT2	AG2	AG2	ADCK1	ADAMTSL2	ACTA2	AG2	APLN	ALAS2
	ADSSL1	AKAP12	ACOT4	AGAP2	AGAP7	ADCK4	ADAP1	ACTB	AGBL4	APLP1	ALDH1A2
	AES	AKAP2	ACOT6	AGER	AGER	ADCK5	ADCK2	ACTG1	AGER	APOA1	ALDH1B1
	AGAP3	AKAP6	ACOX2	AGR2	AGMAT	ADCY2	ADCK5	ACTG2	AGPAT2	AQP1	ALDOC
	AGBL5	AKR1B10	ACOXL	AGRP	AGPAT1	ADM	ADCY10	ACTL6A	AGPAT3	AQP2	ALG1L
	AGER	AKR1B15	ACPP	AGTR1	AGPAT2	ADORA2A	ADCY4	ACTL8	AGR2	AQP3	ALOX12P2
	AGPAT1	AKR1C1	ACRBP	AGT	AGTRAP	ADORA3	ADCY6	ACTN2	AGRN	AQP4	ALOX15
	AGPAT2	AKR1C2	ACRC	AGXT2L2	AGT	ADPRHL1	ADIPOR1	ACTN4	AGRP	AQP6	ALOX5
	AGPAT6	AKR1C3	ACRV1	AHSP	AHCY	ADPRHL2	ADM2	ACTR10	AGT	AQP7P3	ALPK1
	AGTRAP	AKR1D1	ACR	AIF1	AHSA1	ADRA1B	ADORA2A	ACTR1B	AHCYL2	AQP9	ALS2CL
	AGT	ALAS2	ACSBG1	AJAP1	AHSP	ADRA2C	ADORA3	ACTR2	AHCY	AQPEP	ALS2CR8
	AHCY	ALB	ACSBG2	AK1	AIMP2	ADRBK1	ADPRHL1	ACTR3B	AHSA1	ARAP3	AMH
	AHSA1	ALDH1A2	ACSF3	AKAP12	AIP	ADSL	ADPRHL2	ACTR3	AHSP	AREG	AMN
	AIFM1	ALDH1A3	ACSL1	AKT3	AK1	AES	ADRA1B	ACTR8	AIFM1	ARG1	AMPD3
	AIFM3	ALDH1L1	ACSL4	ALAS2	AK2	AFMID	ADRA1D	ACVR1B	AIM1L	ARHGAP26	AMT
	AIM1L	ALDH3A1	ACSL6	ALDH16A1	AKR1A1	AGAP2	ADRA2B	ACVR1	AK1	ARHGAP6	AMY1A
	AIP	ALDOB	ACSM1	ALDH1A1	AKR1B10	AGAP3	ADRA2C	ACVRL1	AK3L1	ARHGEF15	AMY2A
	AK1	ALDOC	ACSM3	ALDH1A2	AKR1C1	AGAP6	ADRBK1	ACY3	AK7	ARHGEF37	AMZ1
	AKAP3	ALG1L	ACSM5	ALDH2	AKR1C3	AGAP7	ADRM1	ACYP2	AKAP6	ARL4C	ANGPTL2
	AKR1A1	ALOX12B	ACSS1	ALOX15B	AKR7A2	AGER	ADSL	ADAD2	AKD1	ARL6	ANGPTL3
	AKR1B1	ALOX12P2	ACSS3	ALOX5AP	AKR7L	AGPAT1	ADSSL1	ADAM10	AKR1B10	ARNTL	ANGPTL4
	AKR1C1	ALOX15B	ACTA1	ALOX5	AKT1S1	AGPAT2	ADSS	ADAM15	AKR1B15	ARPC5	ANKRD11
	AKR1C2	ALOX15	ACTBL2	ALPL	AKTIP	AGRN	AES	ADAM21	ALAS1	ARRDC4	ANKRD26
	AKR1C3	ALOX5AP	ACTC1	AMAC1L2	ALAS2	AGTRAP	AG2	ADAM23	ALAS2	ASPA	ANKRD30B
	AKR7A2	ALOX5	ACTL8	AMICA1	ALB	AHCYL2	AGAP3	ADAM32	ALCAM	ASPDH	ANKRD31
	AKR7A3	ALPK1	ACTN2	AMN	ALDH1A2	AHCY	AGBL2	ADAM9	ALDH2	ASPN	ANKRD34B
	AKT1S1	ALPL	ACTN3	AMPD3	ALDH2	AHDC1	AGER	ADAMTS18	ALDH3A1	ATAD3C	ANKRD36B
	AKT1	ALS2CR12	ACVR1B	AMY2B	ALDH3B2	AHRR	AGPAT1	ADAMTS1	ALDH3A2	ATF3	ANKRD37
	AKT2	AMAC1L2	ACVR1C	ANGPT2	ALDH4A1	AHSA2	AGPAT2	ADAMTS3	ALDH3B1	ATP1A2	ANKRD46
	ALAD	AMBP	ACVR2B	ANGPTL1	ALDH9A1	AIFM3	AGR2	ADAMTS8	ALDH3B2	ATP1B1	ANKRD53
	ALAS1	AMN	ACVRL1	ANGPTL2	ALDOA	AIP	AGRN	ADAT1	ALDH8A1	ATP1B2	ANKS6
	ALDH4A1	AMPD3	ACY3	ANGPTL6	ALDOB	AIRE	AGTRAP	ADA	ALG1L	ATP2B3	ANKZF1
	ALDH7A1	AMY1A	ADAD2	ANGPTL7	ALDOC	AK1	AGT	ADCK2	ALMS1P	ATP2C2	ANO3
	ALDOA	ANGPT2	ADAM11	ANK1	ALG1L	AKAP6	AHCY	ADCY3	ALOX12B	ATP6V0D2	ANO9
	ALDOC	ANGPT4	ADAM12	ANKRD13B	ALG3	AKAP8L	AHSA1	ADCY4	ALOX12P2	ATP6V1C2	ANTXR1
	ALG3	ANGPTL3	ADAM17	ANKRD20A3	ALG8	AKR1A1	AHSP	ADCYAP1R1	ALOX15B	ATP8B3	ANXA3
	ALG8	ANGPTL4	ADAM19	ANKRD20A4	ALKBH7	AKR7A2	AIFM1	ADCYAP1	ALOX15	ATXN1	ANXA8L2
	ALKBH4	ANGPTL5	ADAM20	ANKRD29	ALOX12B	AKR7A3	AIFM2	ADD3	ALOX5	B3GAT1	ANXA8
	ALKBH5	ANKDD1A	ADAM21P1	AOAH	ALPL	AKT1S1	AIFM3	ADH1A	ALOXE3	BARX1	AOC3
	ALKBH6	ANKLE1	ADAM21	AOC3	ALX4	AKT1	AIMP2	ADH1B	ALPL	BATF3	AOX1
	ALKBH7	ANKRD1	ADAM22	APCDD1L	AMBP	AKT2	AIP	ADH1C	ALS2CR12	BCL2A1	APOA1
	ALOX15B	ANKRD20A3	ADAM23	APLNR	AMDHD1	ALDH16A1	AK1	ADH4	AMAC1L3	BCL6B	APOBEC2
	ALOX15	ANKRD20A4	ADAM28	APLN	AMDHD2	ALDH4A1	AKAP8L	ADH5	AMBP	BCL6	APOBEC3B
	ALOX5AP	ANKRD20B	ADAM32	APOA1	AMFR	ALDOA	AKR7A3	ADI1	AMH	BDKRB1	APOB
	AMDHD2	ANKRD22	ADAM33	APOB48R	AMN	ALDOC	AKR7L	ADIPOR1	AMN	BEND4	APRT
	AMFR	ANKRD24	ADAM6	APOBEC3A	ANAPC10	ALG12	AKT1S1	ADM	AMY1A	BGLAP	AQP3
	AMT	ANKRD29	ADAM8	APOB	ANAPC11	ALG3	AKT1	ADORA2A	AMY2A	BGN	AQP5
	AMY1A	ANKRD30B	ADAM9	APOC1	ANAPC16	ALKBH2	ALDH16A1	ADORA2B	AMZ1	BHLHE40	AQP6
	AMY2A	ANKRD33	ADAMDEC1	APOC2	ANGPT1	ALKBH4	ALDH3B1	ADORA3	ANGPTL3	BMP3	AQP7P1
	AMZ2	ANKRD34B	ADAMTS10	APOE	ANGPTL4	ALKBH6	ALDH3B2	ADRA1A	ANK3	BMP5	AQP7P3
	ANAPC11	ANKRD37	ADAMTS12	APOL1	ANGPTL5	ALKBH7	ALDH4A1	ADRB2	ANKK1	BMP8A	AQPEP
	ANGPTL4	ANKRD45	ADAMTS13	APOL3	ANG	ALOX12B	ALDH8A1	ADSL	ANKRD1	BMP8B	ARGFXP2
	ANG	ANKRD55	ADAMTS14	APOL4	ANKLE1	ALOX15B	ALDOA	ADSSL1	ANKRD20A3	BNIP3L	ARHGAP28
	ANKRA2	ANKZF1	ADAMTS15	APOLD1	ANKRD13B	ALOX5AP	ALDOC	AFAP1	ANKRD20B	BNIP3	ARHGAP5
	ANKRD13B	ANO2	ADAMTS16	AQP3	ANKRD19	ALPL	ALG12	AFG3L2	ANKRD22	BRD7P3	ARID3C
	ANKRD13D	ANO3	ADAMTS17	AQP4	ANKRD35	ALS2CL	ALG1L	AG2	ANKRD34B	BRP44	ARL10
	ANKRD20A4	ANO4	ADAMTS18	AQP9	ANKRD37	ALX4	ALG3	AGA	ANKRD45	BSPRY	ARRDC3
	ANKRD34B	ANO5	ADAMTS19	ARAP3	ANKRD45	AMIGO3	ALG5	AGER	ANKRD56	BTBD16	ARSI
	ANKRD37	ANPEP	ADAMTS1	ARC	ANKRD54	AMOT	ALG8	AGTR1	ANKRD58	BTNL8	ART4
	ANKRD39	ANXA2P1	ADAMTS2	ARG1	ANKRD9	AMPD2	ALKBH4	AGTRAP	ANKRD5	BTNL9	ART5
	ANKRD46	ANXA2P3	ADAMTS3	ARHGAP15	ANKS3	AMY1A	ALKBH6	AHCYL1	ANKRD9	C10orf110	AS3MT
	ANKRD54	ANXA3	ADAMTS5	ARHGAP20	ANO7	AMZ2P1	ALKBH7	AHCYL2	ANKS1B	C10orf47	ASAM
	ANKRD9	ANXA8L2	ADAMTS6	ARHGAP23	ANO9	ANAPC11	ALOX5AP	AHCY	ANLN	C10orf50	ASB14
	ANKZF1	ANXA8	ADAMTS8	ARHGAP24	ANP32B	ANAPC2	AMACR	AHSP	ANO3	C10orf75	ASFMR1
	ANO10	AOC2	ADAMTS9	ARHGAP6	ANP32E	ANAPC5	AMBP	AIF1	ANO5	C10orf90	ASPHD1
	ANP32A	AOC3	ADAMTSL1	ARHGAP9	ANXA13	ANGEL1	AMDHD2	AIFM1	ANO8	C11orf20	ASPN
	ANP32B	AOX1	ADAMTSL2	ARHGDIG	ANXA1	ANGPTL4	AMFR	AIFM3	ANO9	C11orf52	ASS1
	ANXA1	AP3B2	ADAMTSL3	ARHGEF15	ANXA2	ANGPTL6	AMIGO1	AIM1	ANXA3	C12orf34	ASXL3
	ANXA2P2	APBB1IP	ADAMTSL5	ARHGEF4	AOC3	ANG	AMY1A	AIM2	ANXA8L2	C12orf57	ATAD3C
	ANXA2	APLN	ADARB1	ARL4D	AP1M1	ANKK1	AMZ2	AIMP1	ANXA8	C12orf68	ATOH7
	ANXA3	APLP1	ADARB2	ARMC4	AP1M2	ANKLE1	ANAPC11	AIMP2	AOC3	C12orf71	ATP2B3
	ANXA4	APOB48R	ADAT1	ARNTL2	AP1S1	ANKRD13B	ANG	AIP	AP1G2	C13orf15	ATP2C2
	ANXA5	APOBEC3A	ADCK1	ARSI	AP2M1	ANKRD13D	ANK1	AJAP1	AP1M2	C14orf153	ATP6AP1L
	ANXA6	APOB	ADCY10	ART4	AP2S1	ANKRD19	ANKHD1-EIF4EBP3	AK1	AP1S3	C14orf33	ATP6V0D2
	AP1G2	APOLD1	ADCY1	ASB2	AP3B2	ANKRD1	ANKRD13B	AK3L1	AP3B2	C15orf26	ATP6V1H
	AP1S1	AQP2	ADCY2	ASB9	AP4M1	ANKRD23	ANKRD13D	AK3	APLP1	C15orf48	ATXN1
	AP2M1	AQP3	ADCY4	ASGR2	APCDD1L	ANKRD24	ANKRD19	AKAP12	APOA1BP	C15orf54	AVPR2
	AP2S1	AQP4	ADCY5	ASPG	APEH	ANKRD34A	ANKRD1	AKAP3	APOA1	C16orf79	AXIN2
	AP3S1	AQP7P1	ADCY7	ASRGL1	APH1A	ANKRD37	ANKRD27	AKNAD1	APOB48R	C16orf81	AZIN1
	AP3S2	AQP7P3	ADCY9	ASTN1	APLN	ANKRD39	ANKRD37	AKR1B10	APOBEC3A	C17orf104	B3GALT2
	AP4M1	AQP9	ADCYAP1R1	ASXL3	APLP1	ANKRD46	ANKRD39	AKR1B1	APOBEC3B	C17orf37	B3GAT2
	APBA2	ARAP3	ADCYAP1	ATF3	APLP2	ANKRD54	ANKRD40	AKR1C1	APOC1	C17orf57	B3GNT3
	APBB1	AREG	ADC	ATOH8	APOA1BP	ANKRD9	ANKRD54	AKR1C2	APOC2	C18orf19	B3GNT4
	APBB3	ARG1	ADD1	ATP13A4	APOA1	ANKS3	ANKRD58	AKR1C3	APOC4	C18orf32	B3GNTL1
	APEH	ARG2	ADD2	ATP1A2	APOC1	ANKZF1	ANKRD5	AKTIP	APOE	C19orf18	B4GALNT3
	APEX2	ARHGAP26	ADH1A	ATP1A3	APOD	ANLN	ANKRD9	ALAD	APOO	C19orf21	BAAT
	APH1A	ARHGAP31	ADH1B	ATP1A4	APOE	ANO4	ANKS3	ALAS2	AQP2	C19orf33	BAI1
	APLP1	ARHGAP9	ADH1C	ATP2B2	APOO	ANO5	ANKZF1	ALCAM	AQP3	C19orf38	BAIAP2L2
	APLP2	ARHGEF15	ADH4	ATP2B3	APRT	ANO7	ANLN	ALDH1A1	AQP4	C19orf51	BAIAP3
	APOA1BP	ARID5A	ADH6	ATP6V0D2	AQP1	ANO8	ANO9	ALDH1A2	AQP5	C19orf59	BARX1
	APOO	ARL5B	ADM2	ATP8A1	AQP4	ANP32B	ANXA2P3	ALDH1A3	AQP6	C19orf77	BAZ1A
	APP	ARMC4	ADM	ATP8A2	ARAP3	ANXA2P3	ANXA6	ALDH2	AQP9	C1QL1	BCHE
	APRT	ARNTL2	ADNP2	ATRNL1	ARF1	AOC2	ANXA7	ALDH3A2	ARAP2	C1QL4	BCL2L15
	APTX	ARRB2	ADORA1	AURKC	ARF4	AP1G2	ANXA9	ALDH3B2	ARC	C1orf116	BCL8
	AQPEP	ARRDC3	ADORA2A	AVPR1A	ARF5	AP1M1	AP1G2	ALDH4A1	AREG	C1orf126	BEAN
	ARAF	ART4	ADORA3	AVPR2	ARFGAP1	AP1S1	AP1M2	ALDH7A1	ARG2	C1orf161	BEGAIN
	ARAP1	ASAH2B	ADPRHL1	AXIN2	ARHGAP11A	AP2M1	AP1S1	ALDH8A1	ARHGAP11A	C1orf183	BEND4
	ARCN1	ASFMR1	ADRA1A	AXL	ARHGDIA	AP2S1	AP2A1	ALDH9A1	ARHGAP11B	C1orf210	BEND5
	AREG	ASGR1	ADRA1B	AZU1	ARHGEF15	AP4B1	AP2A2	ALDOA	ARHGAP39	C1orf27	BGN
	ARF1	ASGR2	ADRA1D	B3GAT1	ARHGEF16	AP4M1	AP2M1	ALG12	ARHGAP8	C1orf51	BHLHA15
	ARF4	ASNS	ADRA2A	B3GNT8	ARHGEF19	APBA3	AP2S1	ALG1L	ARHGEF16	C1orf70	BHLHE22
	ARF5	ASPA	ADRA2B	BAALC	ARHGEF4	APBB1	AP4M1	ALG3	ARHGEF35	C1orf92	BHLHE40
	ARFGAP1	ASPDH	ADRA2C	BAI3	ARL16	APBB3	APBA3	ALG5	ARHGEF38	C20orf106	BHMT
	ARHGAP33	ASPHD1	ADRB1	BATF3	ARL2BP	APCDD1L	APBB1	ALG8	ARHGEF5	C20orf195	BICC1
	ARHGDIA	ASRGL1	ADRB2	BATF	ARL2	APH1A	APEH	ALKBH1	ARID3A	C20orf199	BLK
	ARHGDIG	ASTN1	AFAP1L1	BCAS4	ARL4D	APLN	APEX2	ALKBH2	ARID3B	C20orf200	BMP3
	ARHGEF10L	ATAD3C	AFAP1	BCAT1	ARL6IP4	APLP1	APH1A	ALKBH3	ARID3C	C20orf202	BMP5
	ARHGEF19	ATAD5	AFARP1	BCHE	ARL6IP6	APOA1BP	APLP1	ALKBH4	ARID5A	C20orf203	BMP8A
	ARHGEF5	ATF3	AFF1	BCL11B	ARL8A	APOA1	APOA1BP	ALKBH6	ARMC3	C20orf46	BMPER
	ARID3C	ATG16L2	AFF2	BCL2A1	ARMC6	APOBEC2	APOA1	ALKBH7	ARMC4	C21orf130	BMX
	ARL16	ATG9B	AFF3	BCL3	ARMCX6	APOC1	APOBEC3B	ALOX5AP	ARNTL	C21orf49	BNC1
	ARL2BP	ATOH8	AFF4	BCL6B	ARPC1B	APOC2	APOC1	ALOX5	ARPC5L	C21orf7	BNC2
	ARL2	ATP11A	AFTPH	BCL8	ARPC3	APP	APOC2	ALPL	ARRDC1	C21orf96	BNIP3L
	ARL3	ATP11C	AGAP2	BDKRB1	ARPC4	APRT	APOE	ALS2CL	ARSD	C2CD4C	BOLA1
	ARL4D	ATP13A3	AGAP7	BDKRB2	ARPC5L	APTX	APOO	AMACR	ART4	C2orf76	BRSK2
	ARL6IP4	ATP13A4	AGBL2	BDNF	ARRDC1	AQP1	APRT	AMBP	ARTN	C2orf84	BTBD8
	ARL6IP5	ATP1A2	AGBL3	BEGAIN	ARSA	AQP3	AQP4	AMDHD1	ARX	C3orf36	BTN1A1
	ARL8A	ATP1B3	AGBL4	BEND4	ARSE	AQP5	ARAF	AMDHD2	AR	C3orf45	BZRAP1
	ARMCX6	ATP2B1	AGER	BEND5	ARSJ	AQP6	ARAP3	AMFR	ASAH2B	C3orf54	C10orf108
	ARPC1A	ATP5EP2	AGFG2	BEST1	ARSK	ARAF	ARF1	AMH	ASCL2	C3orf55	C10orf10
	ARPC3	ATP5L2	AGPAT4	BEX1	ARTN	ARAP1	ARF3	AMICA1	ASF1B	C3orf70	C10orf110
	ARPC4	ATP6V1C2	AGPAT9	BGN	ASB13	ARC	ARF5	AMN1	ASL	C3orf72	C10orf55
	ARPC5L	ATRNL1	AGPHD1	BHLHE22	ASF1B	ARF1	ARFGAP1	AMPH	ASPG	C4orf31	C10orf68
	ARRB2	AZU1	AGRP	BHMT2	ASNA1	ARF5	ARFGAP2	AMT	ASPHD1	C4orf32	C10orf75
	ARRDC1	B3GAT1	AGTPBP1	BHMT	ASPG	ARFGAP1	ARFIP2	AMY1A	ASPM	C4orf3	C11orf34
	ARSA	B3GNT4	AGTR1	BIN2	ASPHD1	ARFGAP2	ARHGAP33	AMY2A	ASPSCR1	C4orf47	C11orf42
	ARSK	B3GNT5	AGT	BIRC7	ASRGL1	ARFIP2	ARHGAP39	AMZ2	ASRGL1	C5orf27	C11orf63
	ART5	B4GALT6	AHDC1	BLK	ASS1	ARG2	ARHGAP8	ANAPC10	ASTL	C5orf32	C11orf93
	ARTN	BAAT	AHI1	BLVRA	ATAD3A	ARHGAP33	ARHGAP9	ANAPC11	ATAD3A	C5orf46	C12orf53
	ARVCF	BACH1	AHNAK	BMP6	ATAD3B	ARHGAP4	ARHGDIA	ANAPC13	ATAD3C	C5orf53	C12orf69
	ARX	BAI3	AHRR	BMP8A	ATF5	ARHGDIA	ARHGDIG	ANAPC16	ATAD5	C5orf58	C13orf33
	ASAH1	BANK1	AHR	BMX	ATG4B	ARHGDIG	ARHGEF16	ANAPC1	ATF3	C6orf132	C14orf128
	ASAH2B	BASP1	AHSP	BNC1	ATG4D	ARHGEF11	ARHGEF19	ANAPC5	ATG4D	C6orf142	C14orf147
	ASAP3	BATF3	AIDA	BTBD19	ATG9A	ARHGEF17	ARHGEF1	ANGPT1	ATG9B	C6orf154	C14orf148
	ASB13	BBOX1	AIF1	BTG2	ATHL1	ARHGEF19	ARID3A	ANGPT2	ATP11A	C6orf1	C14orf178
	ASB6	BCAT1	AIM2	BTK	ATN1	ARHGEF1	ARL11	ANGPTL4	ATP13A2	C6orf218	C14orf180
	ASGR1	BCHE	AIRE	BTLA	ATOH8	ARHGEF4	ARL16	ANGPTL6	ATP13A4	C6orf223	C14orf181
	ASMTL	BCL11A	AJAP1	BTN3A3	ATOX1	ARID3C	ARL2	ANG	ATP13A5	C6orf25	C14orf34
	ASNA1	BCL2A1	AK3L1	BTNL8	ATP13A2	ARL16	ARL3	ANKK1	ATP1A1	C6orf48	C14orf37
	ASPHD1	BCL2L15	AK5	BTNL9	ATP2B2	ARL2	ARL4D	ANKMY2	ATP1A3	C6orf52	C14orf93
	ASPSCR1	BCL3	AK7	BVES	ATP5A1	ARL4C	ARL6IP1	ANKRA2	ATP1B3	C7orf52	C15orf28
	ASTL	BCL6	AKAP10	C10orf105	ATP5B	ARL4D	ARL6IP4	ANKRD1	ATP2B3	C7orf53	C15orf42
	ASTN2	BDKRB1	AKAP11	C10orf107	ATP5C1	ARL6IP4	ARL8A	ANKRD22	ATP2C2	C7orf54	C15orf56
	ATF4	BDKRB2	AKAP12	C10orf10	ATP5D	ARMC5	ARMC3	ANKRD29	ATP5D	C7orf57	C16orf3
	ATF6B	BDNF	AKAP13	C10orf114	ATP5EP2	ARMC6	ARMC7	ANKRD39	ATP5L2	C7orf61	C16orf55
	ATG16L2	BEGAIN	AKAP2	C10orf11	ATP5E	ARMC7	ARMCX6	ANKRD53	ATP6AP1	C7orf68	C16orf71
	ATG4B	BEND4	AKAP3	C10orf125	ATP5G1	ARPC4	ARPC1A	ANKRD54	ATP6V0A4	C7orf69	C16orf73
	ATG9A	BEST1	AKAP5	C10orf128	ATP5G2	ARRDC1	ARPC1B	ANKRD55	ATP6V0B	C8orf47	C16orf7
	ATN1	BEX1	AKAP6	C10orf140	ATP5G3	ARRDC2	ARPC3	ANKS1A	ATP6V0C	C8orf58	C16orf81
	ATOX1	BEX5	AKAP7	C10orf54	ATP5H	ARSA	ARPC4	ANO2	ATP6V0D2	C8orf83	C16orf86
	ATP13A1	BHMT	AKAP9	C10orf72	ATP5I	ART3	ARPC5L	ANP32B	ATP6V0E2	C9orf47	C17orf46
	ATP13A2	BID	AKD1	C10orf91	ATP5J2	ARTN	ARPC5	ANP32C	ATP6V1C2	C9	C17orf47
	ATP1A3	BIN2	AKNAD1	C10orf93	ATP5L	ARVCF	ARRDC1	ANP32E	ATP8A1	CA11	C17orf55
	ATP1B2	BIRC3	AKNA	C11orf16	ATP5O	ARX	ARSA	ANTXR2	ATP8A2	CA14	C17orf57
	ATP5B	BLK	AKR1B15	C11orf21	ATP5SL	ASAH2B	ARTN	ANUBL1	ATRNL1	CA2	C17orf82
	ATP5C1	BMP2	AKR1D1	C11orf70	ATP6AP1	ASF1B	AS3MT	ANXA1	AURKAIP1	CA4	C18orf18
	ATP5D	BMP3	AKR1E2	C11orf93	ATP6V0B	ASGR1	ASAH2B	ANXA2P1	AURKAPS1	CA9	C18orf56
	ATP5E	BMP6	AKR7L	C11orf9	ATP6V0D1	ASMTL	ASAH2	ANXA2P2	AURKA	CABP1	C19orf34
	ATP5G1	BMX	AKT3	C12orf61	ATP6V1D	ASNA1	ASB6	ANXA2P3	AURKB	CACNA1E	C19orf40
	ATP5G2	BNC1	ALAS2	C12orf63	ATP6V1E1	ASNS	ASCC2	ANXA2	AZGP1	CACNA1H	C19orf45
	ATP5H	BNIP3L	ALB	C12orf70	ATP6V1F	ASPG	ASF1B	ANXA3	AZU1	CACNG1	C19orf51
	ATP5I	BNIP3	ALCAM	C13orf15	ATP8B3	ASPM	ASGR1	ANXA4	B3GAT1	CACNG4	C19orf57
	ATP5J2	BOLL	ALDH1A2	C13orf16	ATP8B5P	ASPN	ASGR2	ANXA5	B3GNT3	CALB1	C19orf59
	ATP5J	BPI	ALDH1A3	C13orf33	ATPIF1	ASPSCR1	ASL	ANXA6	B3GNT4	CAMK1D	C19orf77
	ATP5L	BRD7P3	ALDH1L1	C14orf132	ATXN7L3	ASS1	ASMTL	ANXA7	B3GNT5	CAMK1G	C1QL4
	ATP5O	BRSK2	ALDH3A1	C14orf159	AUP1	ATAD3A	ASMT	AOC3	B3GNT7	CAMK2N1	C1QTNF1
	ATP5SL	BSND	ALDH3B1	C14orf180	AURKAIP1	ATAD3B	ASNA1	AP1B1	B3GNT8	CAMK2N2	C1QTNF3
	ATP6AP1	BST1	ALDH6A1	C14orf184	AURKA	ATF6B	ASNS	AP1M2	B4GALNT3	CAPN12	C1QTNF7
	ATP6V0B	BTAF1	ALDH8A1	C14orf64	AURKB	ATG16L2	ASPM	AP1S1	B4GALNT4	CASP5	C1R
	ATP6V0C	BTG3	ALDOB	C14orf73	AXIN2	ATG4B	ASPSCR1	AP2B1	B4GALT3	CAST	C1S
	ATP6V0D1	BTNL8	ALDOC	C15orf27	AZU1	ATG4D	ATAD3C	AP2M1	BAG1	CATSPER1	C1orf104
	ATP6V0E1	BTNL9	ALG10B	C15orf48	B3GALT1	ATG9A	ATF4	AP2S1	BAIAP2L1	CAV1	C1orf130
	ATP6V0E2	C10orf105	ALG10	C15orf59	B3GAT3	ATG9B	ATF6B	AP3S1	BAIAP2	CAV2	C1orf152
	ATP6V1B2	C10orf108	ALG11	C16orf45	B3GNT1	ATHL1	ATG16L2	APBA3	BAIAP3	CBFA2T3	C1orf161
	ATP6V1E1	C10orf10	ALK	C16orf54	B4GALNT4	ATN1	ATG4B	APEH	BAMBI	CBLN1	C1orf175
	ATP6V1F	C10orf131	ALLC	C16orf74	B4GALT2	ATOH7	ATG4D	APH1A	BARX1	CBWD3	C1orf186
	ATP6V1G1	C10orf54	ALMS1P	C16orf79	B4GALT3	ATOH8	ATG9A	API5	BARX2	CBWD6	C1orf190
	ATP6V1H	C10orf55	ALMS1	C16orf81	B4GALT5	ATOX1	ATG9B	APIP	BATF	CCBL1	C1orf194
	ATP8B3	C10orf79	ALOX12B	C17orf60	B9D1	ATP10A	ATN1	APITD1	BBC3	CCDC102B	C1orf204
	ATPIF1	C11orf16	ALOX12	C17orf72	B9D2	ATP13A1	ATOX1	APLP1	BBOX1	CCDC107	C1orf213
	ATRIP	C11orf20	ALOX15B	C17orf82	BAAT	ATP1A2	ATP13A2	APLP2	BCAM	CCDC68	C1orf228
	ATXN2L	C11orf88	ALOX15	C17orf87	BAD	ATP1A3	ATP1A2	APOA1BP	BCAP31	CCDC85A	C1orf229
	ATXN7L3	C11orf9	ALOX5AP	C17orf91	BAHD1	ATP1B3	ATP1A3	APOBEC3A	BCAS1	CCDC90A	C1orf51
	AUH	C12orf71	ALOX5	C18orf34	BAIAP2L2	ATP2A1	ATP2A3	APOBEC3B	BCL11A	CCHCR1	C1orf66
	AUP1	C13orf33	ALOXE3	C19orf20	BAIAP2	ATP2B3	ATP5A1	APOBEC3C	BCL2A1	CCL20	C1orf70
	AURKAIP1	C13orf38	ALPK1	C19orf21	BAIAP3	ATP5A1	ATP5B	APOD	BCL2L14	CCL26	C1orf95
	AURKB	C14orf118	ALPK2	C19orf35	BAK1	ATP5B	ATP5C1	APOL3	BCL3	CCL3	C20orf195
	AURKC	C14orf147	ALPK3	C19orf38	BAMBI	ATP5D	ATP5D	APOM	BDH1	CD109	C20orf199
	AXIN1	C14orf19	ALPL	C19orf59	BANF1	ATP5EP2	ATP5EP2	APOO	BDNF	CD14	C20orf94
	AZGP1	C14orf34	ALS2CR11	C19orf73	BAP1	ATP5E	ATP5E	APPL2	BEND3	CD2AP	C21orf122
	AZI1	C14orf50	ALS2CR12	C1QA	BARX1	ATP5G1	ATP5G1	APP	BEND4	CD300A	C21orf125
	AZI2	C14orf64	ALS2CR8	C1QB	BARX2	ATP5G2	ATP5G2	APRT	BEST4	CD300E	C21orf29
	B3GALT4	C14orf73	ALS2	C1QC	BAT3	ATP5G3	ATP5G3	AQP11	BEX1	CD34	C21orf49
	B3GAT3	C15orf26	ALX3	C1QTNF2	BAT5	ATP5H	ATP5H	AQP1	BEX2	CD36	C21orf58
	B3GNT1	C15orf48	ALX4	C1QTNF4	BATF3	ATP5I	ATP5I	AQP3	BEX5	CD55	C21orf82
	B3GNT4	C15orf54	AMAC1L2	C1QTNF7	BAX	ATP5J2	ATP5J2	AQP4	BHLHA15	CDA	C21orf90
	B3GNT9	C15orf5	AMAC1L3	C1R	BBC3	ATP5L	ATP5J	AQP5	BIK	CDH13	C21orf96
	B4GALNT1	C16orf46	AMBP	C1S	BCAM	ATP5O	ATP5SL	ARAP3	BIRC5	CDH5	C22orf41
	B4GALT1	C16orf57	AMBRA1	C1orf101	BCAP31	ATP5SL	ATP6AP1	ARCN1	BLM	CDH6	C2CD4C
	B4GALT2	C16orf61	AMDHD1	C1orf162	BCAT2	ATP6V0B	ATP6V0B	AREG	BMP5	CDK2AP1	C2orf52
	B4GALT7	C16orf7	AMH	C1orf182	BCHE	ATP6V0D2	ATP6V0C	ARF1	BMP7	CDK6	C2orf58
	B9D2	C16orf81	AMICA1	C1orf186	BCKDK	ATP6V1B1	ATP6V0D1	ARF4	BNC1	CDKN2D	C2orf63
	BAD	C17orf47	AMIGO1	C1orf53	BCL2L10	ATP6V1F	ATP6V0E1	ARF5	BNIPL	CDR1	C2orf70
	BAG1	C17orf55	AMIGO3	C1orf54	BCL2L12	ATP8B3	ATP6V0E2	ARFGAP3	BREA2	CEACAM19	C3orf20
	BAG3	C17orf72	AMN1	C1orf70	BCL3	ATP8B5P	ATP6V1B1	ARFIP1	BRI3BP	CEACAM1	C3orf45
	BAHCC1	C17orf96	AMPD3	C1orf92	BCL6B	ATPAF2	ATP6V1E1	ARG1	BRSK2	CEACAM3	C3orf47
	BAHD1	C18orf19	AMPH	C20orf103	BCL6	ATPIF1	ATP6V1F	ARGFXP2	BSCL2	CEACAM6	C3orf55
	BAIAP2L1	C18orf34	AMY2B	C20orf160	BCL7C	ATXN2L	ATP6V1G1	ARHGAP10	BSND	CEBPD	C3orf57
	BAIAP2	C18orf56	AMZ1	C20orf200	BCS1L	ATXN7L2	ATP6V1H	ARHGAP15	BSPRY	CEBPG	C3orf67
	BAK1	C19orf18	AMZ2P1	C20orf203	BDKRB1	ATXN7L3	ATP7B	ARHGAP18	BTBD16	CECR2	C3orf72
	BANF1	C19orf22	ANGPT1	C20orf26	BET1L	AUP1	ATP8B3	ARHGAP25	BTC	CELSR3	C3orf74
	BAP1	C19orf34	ANGPT2	C20orf46	BEX5	AURKAIP1	ATP9A	ARHGAP42	BTG3	CES1	C4BPA
	BARX1	C19orf35	ANGPT4	C21orf15	BGLAP	AURKA	ATPIF1	ARHGAP5	BTNL8	CES4	C4orf31
	BARX2	C19orf38	ANGPTL1	C21orf7	BHLHE22	AURKB	ATXN2L	ARHGAP6	BUB1B	CGN	C4orf36
	BAT4	C19orf59	ANGPTL3	C21orf90	BHLHE40	AVPI1	ATXN7L2	ARHGDIB	BUB1	CHD5	C4orf37
	BAT5	C19orf77	ANGPTL4	C2CD4A	BIK	AXIN2	ATXN7L3	ARHGDIG	BZW2	CHN1	C4orf38
	BATF3	C1QTNF1	ANGPTL5	C2CD4B	BIRC5	AZI1	AUP1	ARHGEF1	C10orf110	CHP	C4orf47
	BAX	C1orf114	ANGPTL6	C2CD4C	BLCAP	AZU1	AURKAIP1	ARHGEF3	C10orf111	CHST8	C4orf49
	BCAM	C1orf162	ANGPTL7	C2orf27A	BLOC1S1	B3GAT3	AURKA	ARHGEF5	C10orf12	CKB	C5orf23
	BCAP31	C1orf173	ANG	C2orf58	BLOC1S3	B3GNT1	AURKB	ARL11	C10orf35	CLDN10	C5orf38
	BCAT2	C1orf183	ANK1	C2orf62	BLVRA	B3GNT4	AXIN1	ARL13B	C10orf47	CLDN14	C5orf46
	BCKDHA	C1orf194	ANK2	C2orf82	BLVRB	B4GALNT1	AZGP1	ARL17B	C10orf75	CLDN18	C5orf4
	BCKDK	C1orf228	ANKAR	C2orf85	BMP2	B4GALNT3	AZI1	ARL2BP	C10orf79	CLDN1	C5orf53
	BCL2A1	C1orf38	ANKDD1A	C2orf89	BMP4	B4GALNT4	B3GALT4	ARL2	C10orf81	CLDN5	C5orf54
	BCL2L12	C1orf61	ANKHD1	C2	BMP5	B4GALT2	B3GAT3	ARL6IP4	C10orf93	CLDN6	C5orf58
	BCL2L13	C1orf92	ANKK1	C3AR1	BMX	B4GALT3	B3GNT1	ARL6IP5	C10orf95	CLDN9	C5
	BCL2L1	C20orf106	ANKMY1	C3orf32	BNIP3	B4GALT7	B4GALNT1	ARL9	C11orf16	CLEC14A	C6orf105
	BCL6	C20orf107	ANKRD10	C3orf36	BOK	B9D1	B4GALNT3	ARMC10	C11orf35	CLEC3B	C6orf123
	BCL7B	C20orf165	ANKRD12	C3orf45	BOLA1	B9D2	B4GALNT4	ARMC1	C11orf42	CLEC5A	C6orf124
	BCL7C	C21orf63	ANKRD16	C3orf54	BOLA3	BAD	B9D2	ARMC6	C11orf48	CLGN	C6orf126
	BCL9L	C22orf15	ANKRD1	C3orf70	BOP1	BAHCC1	BAD	ARMCX3	C11orf52	CLIC1	C6orf163
	BCR	C2CD4A	ANKRD20A3	C4A	BPHL	BAHD1	BAG1	ARPC1A	C11orf80	CLIC5	C6orf164
	BDH1	C2CD4B	ANKRD20A4	C4BPA	BPNT1	BAI1	BAG3	ARPC1B	C11orf82	CLIP1	C6orf170
	BDKRB1	C2orf39	ANKRD20B	C4BPB	BREA2	BAI2	BAHD1	ARPC2	C11orf83	CLIP3	C6orf186
	BEND5	C2orf40	ANKRD23	C4orf31	BRI3	BAIAP2L2	BAI2	ARPC3	C11orf84	CLIP4	C6orf208
	BET1L	C2orf48	ANKRD24	C4orf48	BRMS1	BAIAP2	BAIAP2L1	ARPC4	C11orf88	CLLU1OS	C6orf223
	BEX2	C2orf62	ANKRD26P1	C5AR1	BRP44	BAIAP3	BAIAP2	ARPC5	C11orf9	CLSTN2	C6orf52
	BEX4	C2orf70	ANKRD26	C5orf13	BSCL2	BAK1	BAIAP3	ARRDC3	C12orf34	CNN2	C6orf57
	BEX5	C2orf71	ANKRD28	C5orf20	BSDC1	BAMBI	BAK1	ARRDC5	C12orf49	CNN3	C6orf59
	BFSP1	C2orf85	ANKRD31	C5orf38	BSG	BANF1	BAMBI	ARSE	C12orf59	CNRIP1	C6
	BGLAP	C3orf15	ANKRD33	C5orf49	BST2	BAP1	BANF1	ARSI	C12orf60	CNTD2	C7orf10
	BGN	C3orf20	ANKRD34A	C5orf56	BTBD2	BARX1	BAT3	ART3	C13orf15	CNTN4	C7orf28B
	BHLHE22	C3orf36	ANKRD34B	C5orf62	BTBD6	BAT1	BAT4	ART4	C14orf147	COBL	C7orf52
	BHLHE40	C3orf52	ANKRD36BP1	C6orf105	BTF3	BAT3	BAT5	ART5	C14orf148	COL19A1	C7orf54
	BID	C3orf59	ANKRD36B	C6orf114	BTG3	BAT4	BATF3	ARX	C14orf174	COL28A1	C7orf68
	BIN1	C3orf64	ANKRD36	C6orf126	BTNL9	BCAM	BATF	AS3MT	C14orf181	COL2A1	C7orf69
	BIN3	C4BPA	ANKRD37	C6orf150	BUB1B	BCAP31	BAX	ASAH1	C14orf184	COL4A1	C7
	BLMH	C4BPB	ANKRD43	C6orf155	BYSL	BCAT2	BBC3	ASAH2B	C14orf1	COL4A2	C8orf39
	BLOC1S1	C4orf31	ANKRD44	C6orf174	C10orf107	BCHE	BCAM	ASAH2	C14orf50	COL5A3	C8orf44
	BLVRB	C4orf3	ANKRD45	C6orf186	C10orf114	BCKDHA	BCAP31	ASAM	C14orf64	COL6A3	C8orf45
	BMP1	C4orf47	ANKRD50	C6orf26	C10orf125	BCKDK	BCAR1	ASAP3	C15orf23	COL7A1	C8orf73
	BMP2	C5AR1	ANKRD52	C6	C10orf35	BCL11A	BCAS1	ASB13	C15orf27	COL8A1	C8orf79
	BMP4	C5orf23	ANKRD53	C7orf54	C10orf47	BCL2L12	BCAT2	ASB2	C15orf37	COLEC10	C8orf80
	BNIP1	C5orf27	ANKRD55	C7orf69	C10orf57	BCL7A	BCHE	ASB3	C15orf48	COMMD6	C9orf122
	BNIP3L	C5orf32	ANKRD56	C7	C10orf75	BCL7C	BCKDHA	ASB8	C15orf54	CORIN	C9orf125
	BNIP3	C5orf40	ANKRD58	C8orf34	C10orf91	BCL9L	BCKDK	ASB9	C15orf56	COX4I2	C9orf128
	BOD1	C5orf58	ANKRD6	C8orf42	C10orf95	BCS1L	BCL2L12	ASMTL	C16orf3	COX6B1	C9orf139
	BOLA3	C5orf62	ANKS1B	C8orf48	C11orf10	BEGAIN	BCL2	ASNA1	C16orf59	COX7A1	C9orf144B
	BOP1	C5	ANO2	C8orf4	C11orf16	BEND5	BCL3	ASNSD1	C16orf71	CPA4	C9orf163
	BRCA1	C6orf105	ANO3	C8orf79	C11orf31	BEST3	BCL7B	ASNS	C16orf74	CPLX2	C9orf170
	BRD7	C6orf126	ANO4	C8orf80	C11orf35	BEST4	BCL7C	ASPA	C16orf75	CPNE4	C9orf173
	BRF2	C6orf138	ANO5	C9orf122	C11orf51	BET1L	BCORL1	ASPG	C16orf79	CPNE9	C9orf47
	BRI3	C6orf142	ANO6	C9orf125	C11orf59	BGLAP	BCOR	ASPN	C16orf89	CPS1	C9orf50
	BRMS1	C6orf176	ANO7	C9orf167	C11orf67	BGN	BCR	ASPSCR1	C16orf93	CP	C9orf66
	BRSK1	C6orf223	ANP32C	C9orf47	C11orf68	BIN1	BCS1L	ASS1	C17orf100	CRB3	C9orf68
	BRSK2	C6orf26	ANTXR2	C9orf72	C11orf73	BIRC5	BDH1	ATAD1	C17orf28	CRLF1	C9orf93
	BSCL2	C6orf57	ANUBL1	CA12	C11orf74	BLK	BDKRB1	ATF1	C17orf37	CRMP1	CA1
	BSDC1	C6orf81	ANXA13	CA1	C11orf75	BLOC1S1	BEST4	ATF3	C17orf46	CRP	CABP4
	BSG	C6	ANXA2P1	CA3	C11orf83	BLVRB	BEX2	ATF4	C17orf55	CRYAB	CACNA1F
	BSPRY	C7orf40	ANXA2P3	CA4	C11orf84	BMP3	BGLAP	ATG3	C17orf63	CSDC2	CACNA1I
	BTBD2	C7orf53	ANXA6	CABP1	C11orf90	BMP4	BGN	ATG4A	C17orf67	CSNK1A1L	CACNB4
	BTBD6	C7orf54	AOAH	CACNA1C	C12orf10	BMP5	BHLHA15	ATG4C	C17orf72	CSNK1A1	CALB1
	BTF3	C7orf57	AOC2	CACNA1G	C12orf44	BNIP1	BIK	ATG9A	C17orf82	CSPG4	CALCOCO1
	BUD13	C7orf61	AOC3	CACNA1H	C12orf47	BNIP3	BIRC5	ATIC	C17orf96	CSPG5	CALHM1
	BUD31	C7orf63	AOX1	CACNA2D2	C12orf52	BOLA1	BLNK	ATL2	C17orf97	CSTB	CALML5
	C10orf116	C7orf68	AP1S2	CADM3	C12orf57	BOLA3	BLOC1S1	ATL3	C18orf16	CTNNA1	CALML6
	C10orf125	C7	AP2B1	CALCB	C12orf62	BOP1	BLOC1S3	ATP11A	C18orf45	CTSE	CAMK2A
	C10orf35	C8orf34	AP3B2	CALCRL	C12orf76	BPHL	BLVRA	ATP13A2	C19orf18	CTSL2	CAMK2B
	C10orf75	C8orf79	AP4E1	CALCR	C13orf15	BRD9	BLVRB	ATP13A4	C19orf20	CTU1	CAMP
	C11orf10	C9orf125	AP4S1	CALHM1	C13orf16	BREA2	BMF	ATP1A1	C19orf21	CXCL17	CAPN12
	C11orf17	C9orf144B	APAF1	CALML5	C14orf142	BRF1	BMPR1B	ATP1B1	C19orf28	CXCL1	CAPN6
	C11orf24	C9orf153	APBA1	CALN1	C14orf147	BRI3	BNIP1	ATP2C2	C19orf33	CXCL2	CAPN8
	C11orf2	C9orf24	APBA2	CAMK1G	C14orf156	BRIP1	BNIP3	ATP5A1	C19orf38	CXCL3	CAPN9
	C11orf31	C9orf40	APBB1IP	CAMK1	C14orf179	BRMS1	BNIPL	ATP5B	C19orf45	CXCL5	CAPS
	C11orf35	C9orf47	APBB1	CAMK2A	C14orf181	BRSK1	BOK	ATP5C1	C19orf46	CXCR1	CASQ2
	C11orf48	C9orf50	APBB2	CAMKV	C14orf1	BSCL2	BOLA1	ATP5D	C19orf51	CYB5A	CATSPER2P1
	C11orf59	C9orf72	APC2	CAMP	C14orf79	BSG	BOP1	ATP5EP2	C19orf52	CYGB	CATSPER2
	C11orf66	CA13	APCDD1L	CAPN11	C14orf80	BTBD2	BPHL	ATP5E	C19orf59	CYP1A1	CATSPER3
	C11orf67	CA1	APC	CAPN13	C15orf24	BTBD6	BRD2	ATP5F1	C19orf73	CYP2B7P1	CBFA2T3
	C11orf68	CA2	APH1B	CASP10	C15orf59	BUB1B	BRF1	ATP5G1	C1QBP	CYP4A11	CBLN3
	C11orf73	CA3	APLF	CASP12	C15orf61	BUB1	BRI3BP	ATP5G2	C1QB	CYP4B1	CBX5
	C11orf75	CA4	APLNR	CASP5	C15orf63	BUB3	BRI3	ATP5G3	C1QL2	CYP4F3	CBX8
	C11orf83	CA9	APLN	CATSPER1	C16orf13	BYSL	BRMS1	ATP5H	C1orf104	CYP7A1	CCBE1
	C11orf84	CABP1	APLP1	CAV1	C16orf42	BZRAP1	BRP44	ATP5I	C1orf106	CYSLTR2	CCBP2
	C11orf90	CABP7	APOA1	CBFA2T3	C16orf48	C10orf105	BRPF3	ATP5J2	C1orf113	D4S234E	CCDC114
	C11orf93	CACNA1E	APOB48R	CBLN4	C16orf57	C10orf125	BRSK1	ATP5J	C1orf114	DACT3	CCDC116
	C12orf10	CACNA1F	APOBEC2	CC2D2B	C16orf58	C10orf2	BSCL2	ATP5L	C1orf115	DAND5	CCDC11
	C12orf34	CADM3	APOBEC3A	CCBE1	C16orf59	C10orf35	BSG	ATP5O	C1orf116	DBI	CCDC122
	C12orf44	CALCA	APOBEC3B	CCDC102B	C16orf5	C10orf41	BST2	ATP5SL	C1orf130	DBNDD2	CCDC135
	C12orf45	CALCRL	APOBEC3D	CCDC108	C16orf61	C10orf47	BTBD2	ATP6AP2	C1orf135	DCAF6	CCDC13
	C12orf47	CALML3	APOBEC3F	CCDC3	C16orf74	C10orf75	BTBD6	ATP6V0A2	C1orf161	DCLK3	CCDC144A
	C12orf52	CARD16	APOBEC3G	CCDC42B	C16orf75	C10orf91	BUB1B	ATP6V0A4	C1orf168	DCT	CCDC144B
	C12orf53	CASP12	APOBEC3H	CCDC46	C16orf79	C11orf10	BUB1	ATP6V0B	C1orf170	DDIT4L	CCDC144C
	C12orf57	CASP4	APOB	CCDC48	C16orf80	C11orf20	BUB3	ATP6V0C	C1orf172	DDIT4	CCDC148
	C12orf62	CASP5	APOC4	CCDC68	C16orf89	C11orf21	BUD31	ATP6V0D1	C1orf173	DDX11L2	CCDC151
	C13orf15	CASQ2	APOL1	CCDC69	C16orf91	C11orf2	BZRAP1	ATP6V0D2	C1orf182	DEFB1	CCDC153
	C14orf128	CATSPER1	APOL3	CCDC80	C17orf106	C11orf31	C10orf114	ATP6V0E1	C1orf192	DENND2A	CCDC154
	C14orf153	CAV2	APOL4	CCDC85A	C17orf37	C11orf35	C10orf116	ATP6V0E2	C1orf194	DENND3	CCDC155
	C14orf156	CBLN1	APOL6	CCDC85B	C17orf49	C11orf49	C10orf35	ATP6V1A	C1orf210	DIRAS2	CCDC158
	C14orf179	CBS	APOOL	CCDC8	C17orf55	C11orf51	C10orf50	ATP6V1D	C1orf228	DKFZp779M0652	CCDC17
	C14orf1	CCBE1	APPBP2	CCL13	C17orf56	C11orf59	C10orf57	ATP6V1E1	C1orf53	DKK3	CCDC19
	C14orf2	CCBP2	APPL2	CCL14	C17orf59	C11orf66	C10orf58	ATP6V1F	C1orf61	DLC1	CCDC36
	C14orf80	CCDC102B	AQP11	CCL16	C17orf61	C11orf67	C10orf75	ATP6V1G1	C1orf66	DLGAP2	CCDC46
	C15orf21	CCDC108	AQP1	CCL18	C17orf70	C11orf68	C10orf82	ATP6V1G2	C1orf84	DLK2	CCDC62
	C15orf23	CCDC11	AQP2	CCL19	C17orf72	C11orf71	C10orf91	ATP6V1H	C1orf88	DLL3	CCDC68
	C15orf24	CCDC135	AQP4	CCL20	C17orf79	C11orf73	C11orf10	ATXN10	C1orf92	DLL4	CCDC80
	C15orf26	CCDC147	AQP5	CCL21	C17orf86	C11orf75	C11orf17	AUP1	C1orf93	DLX4	CCL13
	C15orf44	CCDC148	AQP6	CCL23	C17orf89	C11orf83	C11orf31	AURKAIP1	C1orf96	DLX5	CCL14
	C15orf48	CCDC151	AQP7P1	CCL26	C17orf90	C11orf84	C11orf35	AURKB	C20orf134	DLX6AS	CCL16
	C15orf57	CCDC155	AQP7P3	CCL2	C17orf95	C11orf93	C11orf48	AVEN	C20orf135	DLX6	CCL17
	C15orf59	CCDC17	AQP7	CCL3L1	C17orf96	C11orf9	C11orf49	AVPI1	C20orf151	DMBT1	CCL18
	C15orf61	CCDC3	AQP9	CCL3	C18orf16	C12orf10	C11orf52	AZGP1	C20orf195	DMP1	CCL19
	C15orf63	CCDC62	AQPEP	CCL4L2	C18orf18	C12orf53	C11orf59	AZI2	C20orf202	DMRT2	CCL20
	C16orf13	CCDC68	ARAP2	CCL4	C18orf19	C12orf57	C11orf83	AZIN1	C20orf26	DNAJB6	CCL21
	C16orf42	CCDC69	ARAP3	CCL5	C18orf34	C12orf60	C11orf84	AZU1	C20orf54	DNAJC18	CCL23
	C16orf48	CCDC88B	ARC	CCL8	C18orf56	C13orf15	C12orf10	B2M	C21orf121	DNAJC6	CCL26
	C16orf53	CCL13	ARFGEF1	CCND2	C19orf10	C13orf38	C12orf34	B3GALTL	C21orf125	DNER	CCNG2
	C16orf57	CCL14	ARFGEF2	CCR10	C19orf22	C14orf104	C12orf44	B3GAT1	C21orf128	DNM3	CCNI2
	C16orf58	CCL16	ARG1	CCR1	C19orf24	C14orf179	C12orf52	B3GNT3	C21orf58	DOCK6	CCR3
	C16orf59	CCL18	ARGFXP2	CCR2	C19orf25	C14orf1	C12orf57	B3GNT7	C21orf81	DOK6	CCR9
	C16orf5	CCL19	ARHGAP10	CCR4	C19orf33	C14orf21	C12orf59	B4GALT6	C22orf15	DPCR1	CD14
	C16orf61	CCL20	ARHGAP11B	CCR5	C19orf36	C14orf2	C12orf62	B9D2	C22orf41	DPF3	CD164L2
	C16orf73	CCL21	ARHGAP12	CCR7	C19orf38	C14orf80	C12orf65	BAALC	C2CD2L	DPP10	CD19
	C16orf79	CCL23	ARHGAP15	CCRL2	C19orf40	C14orf93	C12orf68	BAAT	C2CD4A	DPYSL2	CD207
	C16orf80	CCL2	ARHGAP17	CD14	C19orf43	C15orf42	C12orf76	BACE2	C2CD4B	DSC2	CD209
	C16orf91	CCL3L1	ARHGAP18	CD163	C19orf46	C15orf59	C13orf27	BAG2	C2CD4D	DSC3	CD27
	C16orf93	CCL3	ARHGAP20	CD177	C19orf47	C15orf61	C13orf37	BAG3	C2orf15	DSEL	CD300E
	C17orf101	CCL4L2	ARHGAP24	CD19	C19orf48	C15orf63	C14orf104	BAGE2	C2orf39	DSG3	CD302
	C17orf106	CCL4	ARHGAP25	CD1D	C19orf50	C16orf13	C14orf109	BAI1	C2orf48	DSPP	CD79A
	C17orf37	CCNA1	ARHGAP26	CD200	C19orf51	C16orf48	C14orf119	BAMBI	C2orf50	DSTN	CDC25B
	C17orf39	CCNL1	ARHGAP28	CD209	C19orf52	C16orf53	C14orf129	BANF1	C2orf54	DYNLRB1	CDC42EP5
	C17orf48	CCR1	ARHGAP29	CD22	C19orf53	C16orf58	C14orf142	BANK1	C2orf55	EBF2	CDCA7
	C17orf49	CCR3	ARHGAP30	CD244	C19orf56	C16orf59	C14orf153	BAP1	C2orf62	EBF4	CDH12
	C17orf53	CCR7	ARHGAP31	CD247	C19orf57	C16orf5	C14orf156	BARX1	C2orf66	ECH1	CDH3
	C17orf55	CCR9	ARHGAP42	CD248	C19orf59	C16orf75	C14orf167	BASP1	C2orf70	ECM1	CDHR1
	C17orf56	CCRL2	ARHGAP5	CD274	C19orf60	C16orf79	C14orf179	BAT3	C2orf72	ECSCR	CDHR2
	C17orf59	CCRN4L	ARHGAP6	CD2	C19orf62	C16orf7	C14orf1	BATF	C2orf73	ECT2L	CDHR5
	C17orf61	CD163	ARHGAP9	CD300A	C19orf63	C16orf81	C14orf2	BAX	C2orf77	EDIL3	CDK10
	C17orf75	CD19	ARHGDIG	CD300C	C19orf6	C16orf86	C14orf50	BBS12	C2orf79	EDN2	CDK3
	C17orf79	CD1D	ARHGEF10L	CD300E	C19orf70	C16orf93	C14orf79	BBS7	C3orf14	EDNRA	CDKL2
	C17orf89	CD200	ARHGEF10	CD300LB	C19orf76	C17orf101	C14orf80	BCAM	C3orf20	EDNRB	CDKL3
	C17orf90	CD209	ARHGEF12	CD300LF	C19orf77	C17orf106	C15orf21	BCAP31	C3orf36	EEF1A2	CDNF
	C17orf95	CD274	ARHGEF15	CD300LG	C1D	C17orf107	C15orf23	BCAS2	C3orf52	EFCAB3	CDON
	C17orf96	CD300A	ARHGEF35	CD33	C1QL4	C17orf37	C15orf24	BCAS4	C3orf57	EFNA3	CDR1
	C19orf10	CD300C	ARHGEF38	CD34	C1QTNF1	C17orf49	C15orf48	BCDIN3D	C3orf67	EFR3B	CDRT15P
	C19orf24	CD300E	ARHGEF6	CD36	C1QTNF9B	C17orf53	C15orf63	BCHE	C4BPA	EGFL6	CDT1
	C19orf33	CD300LB	ARHGEF9	CD37	C1orf106	C17orf56	C16orf13	BCKDK	C4orf19	EGFL7	CECR2
	C19orf40	CD300LG	ARID1A	CD38	C1orf115	C17orf59	C16orf42	BCL2A1	C4orf31	EGLN3	CECR4
	C19orf45	CD36	ARID2	CD3D	C1orf122	C17orf61	C16orf48	BCL2L12	C4orf44	EHD2	CELF4
	C19orf46	CD37	ARID3A	CD3E	C1orf135	C17orf70	C16orf53	BCL3	C4orf47	EID2	CELF5
	C19orf47	CD38	ARID3B	CD3G	C1orf151	C17orf81	C16orf58	BCL6B	C4orf48	EIF1	CEL
	C19orf48	CD40	ARID3C	CD40LG	C1orf159	C17orf82	C16orf59	BCL8	C4orf6	EIF3IP1	CEP192
	C19orf51	CD44	ARID4A	CD40	C1orf168	C17orf86	C16orf61	BCO2	C5AR1	EIF4EBP1	CES1
	C19orf53	CD48	ARID4B	CD48	C1orf170	C17orf89	C16orf75	BDH2	C5orf23	ELAVL2	CES3
	C19orf54	CD52	ARID5A	CD4	C1orf172	C17orf90	C16orf79	BDNFOS	C5orf38	ELMOD1	CES4
	C19orf56	CD53	ARID5B	CD52	C1orf210	C17orf96	C16orf80	BECN1	C5orf40	ELOVL2	CFDP1
	C19orf59	CD55	ARL10	CD53	C1orf216	C18orf18	C16orf81	BEND5	C5orf49	EMCN	CFHR3
	C19orf61	CD58	ARL11	CD5	C1orf226	C18orf56	C16orf86	BET1L	C6orf105	EMP1	CFTR
	C19orf63	CD69	ARL13A	CD68	C1orf31	C19orf10	C16orf91	BEX2	C6orf106	EMR2	CG030
	C19orf66	CD79B	ARL15	CD69	C1orf35	C19orf20	C16orf93	BEX5	C6orf115	EMR3	CHD5
	C19orf70	CD93	ARL17A	CD6	C1orf43	C19orf22	C17orf106	BFAR	C6orf123	EMR4P	CHDH
	C19orf73	CD97	ARL17B	CD79A	C1orf50	C19orf24	C17orf28	BFSP1	C6orf124	EN2	CHGA
	C19orf76	CDA	ARL3	CD79B	C1orf53	C19orf25	C17orf37	BGLAP	C6orf126	ENG	CHMP1A
	C19orf77	CDC42EP2	ARL4C	CD80	C1orf56	C19orf26	C17orf55	BGN	C6orf127	ENO2	CHRDL1
	C1D	CDC42EP3	ARL5B	CD86	C1orf57	C19orf28	C17orf56	BHLHB9	C6orf154	ENPEP	CHRDL2
	C1GALT1C1	CDC45	ARL9	CD8A	C1orf63	C19orf29	C17orf58	BHLHE40	C6orf165	ENTPD2	CHRM4
	C1QBP	CDCA7	ARMC2	CD93	C1orf66	C19orf36	C17orf59	BIK	C6orf168	EPB41L3	CHRNA3
	C1QL1	CDH22	ARMC3	CD96	C1orf85	C19orf38	C17orf61	BIN3	C6orf174	EPB42	CHRNA7
	C1R	CDH26	ARMC4	CDA	C1orf86	C19orf47	C17orf62	BIRC7	C6orf176	EPOR	CHRNB4
	C1S	CDH2	ARMC5	CDC42EP2	C1orf89	C19orf48	C17orf67	BLK	C6orf217	ERAS	CHRNG
	C1orf115	CDH5	ARMC9	CDC42EP5	C1orf93	C19orf50	C17orf71	BLNK	C6orf223	ERC2	CHST4
	C1orf122	CDHR2	ARMCX1	CDH15	C20orf11	C19orf52	C17orf79	BLOC1S1	C6orf226	EREG	CHST9
	C1orf123	CDHR3	ARMCX2	CDH23	C20orf160	C19orf53	C17orf82	BLVRA	C6orf25	ERN2	CIDEC
	C1orf128	CDHR5	ARMCX3	CDH2	C20orf195	C19orf54	C17orf90	BLVRB	C6orf27	ERO1L	CILP2
	C1orf144	CDKL2	ARMCX5	CDH5	C20orf199	C19orf56	C17orf95	BMI1	C6orf52	ERRFI1	CILP
	C1orf151	CDKN1A	ARNT2	CDH6	C20orf20	C19orf57	C18orf32	BMP4	C7orf13	ESAM	CKMT2
	C1orf162	CDKN2D	ARNTL2	CDHR1	C20orf24	C19orf60	C19orf10	BMP5	C7orf53	ESM1	CLCA2
	C1orf172	CDKN3	ARNTL	CDHR4	C20orf27	C19orf61	C19orf20	BMP6	C7orf57	EXD1	CLCN5
	C1orf173	CDRT1	ARRB1	CDKL4	C20orf29	C19orf62	C19orf21	BMPER	C8orf34	EXOC3L2	CLCNKA
	C1orf201	CDSN	ARRDC3	CDKN1A	C20orf43	C19orf63	C19orf24	BMX	C8orf38	EXOC3L	CLCNKB
	C1orf35	CDV3	ARRDC4	CDX1	C20orf46	C19orf6	C19orf26	BNIP1	C8orf47	F2RL3	CLDN18
	C1orf51	CEACAM1	ARRDC5	CEACAM21	C20orf4	C19orf70	C19orf33	BOLA3	C8orf4	F2	CLDN3
	C1orf57	CEACAM21	ARSB	CEACAM3	C20orf54	C19orf71	C19orf36	BOP1	C8orf51	F8	CLDN5
	C1orf63	CEACAM22P	ARSE	CEACAM4	C20orf96	C19orf76	C19orf38	BPGM	C8orf85	FAM114A1	CLDN9
	C1orf66	CEACAM3	ARSG	CEACAM6	C21orf29	C1QL1	C19orf40	BPHL	C9orf100	FAM127A	CLDND2
	C1orf89	CEACAM4	ARSI	CEBPD	C21orf33	C1QL2	C19orf43	BPNT1	C9orf116	FAM129B	CLEC10A
	C20orf111	CEACAM6	ARSJ	CERKL	C21orf56	C1QL4	C19orf45	BRAP	C9orf117	FAM135B	CLEC11A
	C20orf11	CEBPB	ART3	CES4	C21orf70	C1QTNF2	C19orf46	BRD7	C9orf122	FAM13C	CLEC4F
	C20orf199	CEBPD	ART4	CETP	C22orf32	C1QTNF3	C19orf48	BRE	C9orf128	FAM150B	CLEC4GP1
	C20orf202	CECR2	ART5	CFB	C22orf36	C1QTNF7	C19orf51	BRI3	C9orf140	FAM153A	CLEC4G
	C20orf203	CECR4	ARX	CFD	C22orf40	C1orf106	C19orf52	BRIX1	C9orf142	FAM153B	CLEC5A
	C20orf20	CELF4	AR	CFH	C22orf41	C1orf113	C19orf53	BRMS1	C9orf152	FAM162A	CLGN
	C20orf24	CELF5	AS3MT	CFI	C2CD4B	C1orf122	C19orf56	BRP44L	C9orf163	FAM162B	CLIC6
	C20orf27	CENPV	ASAH1	CFTR	C2CD4C	C1orf123	C19orf59	BRP44	C9orf169	FAM166A	CLK3
	C20orf3	CEP170L	ASAH2	CGB7	C2orf24	C1orf126	C19orf60	BRSK1	C9orf172	FAM167A	CLUL1
	C20orf43	CES1	ASAP2	CH25H	C2orf27A	C1orf133	C19orf61	BSCL2	C9orf173	FAM176B	CMAH
	C20orf46	CES4	ASB14	CHGA	C2orf28	C1orf144	C19orf63	BSG	C9orf24	FAM180A	CMIP
	C20orf96	CETP	ASB16	CHGB	C2orf40	C1orf151	C19orf6	BSPRY	C9orf43	FAM183A	CMTM1
	C21orf119	CFHR3	ASB1	CHIT1	C2orf47	C1orf159	C19orf70	BST2	C9orf45	FAM27C	CMYA5
	C21orf33	CFI	ASB2	CHN1	C2orf65	C1orf175	C19orf73	BTBD11	C9orf47	FAM46B	CN5H6.4
	C21orf56	CFLAR	ASB9	CHN2	C2orf79	C1orf228	C1D	BTBD1	C9orf66	FAM59A	CNGA4
	C21orf59	CFLP1	ASCC3	CHRDL1	C2orf7	C1orf31	C1QA	BTC	C9orf7	FAM65C	COG4
	C21orf70	CFP	ASCL2	CHRD	C3orf10	C1orf35	C1QB	BTD	C9orf84	FAM69C	COL10A1
	C22orf25	CFTR	ASFMR1	CHRNA7	C3orf33	C1orf51	C1QC	BTF3	C9orf86	FAM78B	COL11A1
	C22orf39	CG030	ASGR1	CHST11	C3orf36	C1orf59	C1QL1	BTG1	C9orf98	FARP1	COL11A2
	C22orf40	CGB7	ASGR2	CHST13	C3orf37	C1orf63	C1QL4	BTG3	CA14	FBLL1	COL14A1
	C2CD2L	CH25H	ASH1L	CHST15	C3orf47	C1orf66	C1QTNF4	BTLA	CA1	FBXL16	COL17A1
	C2orf24	CHEK2	ASMTL	CHST1	C3orf55	C1orf86	C1orf115	BTNL8	CA2	FBXO2	COL25A1
	C2orf28	CHGA	ASMT	CHST7	C3orf71	C1orf89	C1orf122	BUD13	CA3	FBXO32	COL27A1
	C2orf43	CHGB	ASPA	CIITA	C4A	C1orf93	C1orf151	BUD31	CA4	FCAR	COL3A1
	C2orf47	CHI3L1	ASPDH	CILP	C4BPA	C20orf152	C1orf172	BYSL	CA8	FCGBP	COL4A3
	C2orf72	CHI3L2	ASPG	CISH	C4orf31	C20orf195	C1orf182	BZW1	CA9	FCGR2B	COL4A4
	C2orf74	CHIC2	ASPHD1	CLDN14	C4orf49	C20orf199	C1orf183	BZW2	CABLES2	FCGR2C	COL4A6
	C2orf76	CHL1	ASPHD2	CLDN16	C4orf52	C20orf200	C1orf201	C10orf107	CABP7	FCGR3B	COL6A3
	C2orf7	CHN1	ASPRV1	CLDN18	C5orf30	C20orf202	C1orf228	C10orf10	CACNA1D	FCN3	COL6A4P2
	C3orf10	CHODL	ASRGL1	CLDN1	C5orf32	C20orf20	C1orf229	C10orf110	CACNA1F	FERMT2	COL6A6
	C3orf18	CHPT1	ASTE1	CLDN5	C5orf35	C20orf27	C1orf27	C10orf116	CACNA1H	FEZ1	COL8A2
	C3orf39	CHRDL1	ASTL	CLEC10A	C5orf38	C20orf46	C1orf31	C10orf119	CACNA2D2	FFAR2	COLEC12
	C3orf54	CHRDL2	ASTN1	CLEC11A	C5orf45	C20orf96	C1orf35	C10orf11	CACNG1	FFAR3	COMP
	C3orf71	CHRNA3	ASTN2	CLEC12A	C5orf46	C21orf119	C1orf43	C10orf125	CACNG4	FGF11	CORIN
	C3orf75	CHRNB4	ASXL2	CLEC12B	C5orf62	C21orf125	C1orf51	C10orf131	CADM1	FGF13	CORO6
	C4orf12	CHST11	ASXL3	CLEC14A	C6orf108	C21orf2	C1orf63	C10orf32	CADM2	FGF17	COX4I1
	C4orf14	CHST15	ATAD1	CLEC18C	C6orf123	C21orf33	C1orf66	C10orf35	CADM4	FGF18	COX6B2
	C4orf38	CHST2	ATAD2B	CLEC1A	C6orf125	C21orf45	C1orf70	C10orf47	CALCB	FGF2	CPA3
	C4orf3	CHST4	ATAD3C	CLEC2B	C6orf127	C21orf56	C1orf85	C10orf57	CALML3	FGL1	CPAMD8
	C4orf47	CHST9	ATE1	CLEC3B	C6orf129	C21orf58	C1orf86	C10orf58	CALML5	FHL2	CPB2
	C4orf49	CHSY1	ATF2	CLEC4D	C6orf136	C21orf70	C1orf89	C10orf75	CALML6	FIBCD1	CPLX1
	C4orf52	CKMT2	ATF6	CLEC4E	C6orf138	C21orf7	C1orf93	C10orf82	CAMK1G	FKBP1B	CPLX3
	C5orf28	CKM	ATF7IP2	CLEC4GP1	C6orf186	C21orf90	C20orf103	C11orf10	CAMK2N2	FLJ23867	CPNE7
	C5orf32	CLCF1	ATF7IP	CLEC4G	C6orf1	C22orf32	C20orf106	C11orf24	CAMK4	FLJ42393	CPO
	C5orf38	CLCN1	ATG10	CLEC5A	C6orf223	C22orf36	C20orf107	C11orf48	CAMP	FLJ42875	CPXM2
	C5orf45	CLCNKA	ATG16L2	CLIC2	C6orf226	C22orf40	C20orf111	C11orf51	CAMTA1	FLOT1	CPZ
	C5orf46	CLDN10	ATG2B	CLIC3	C6orf26	C22orf9	C20orf11	C11orf58	CANT1	FLT1	CR1
	C5orf54	CLDN14	ATG7	CLIC5	C6orf48	C2CD2L	C20orf135	C11orf59	CAPN12	FLT4	CRABP1
	C5orf62	CLDN16	ATG9B	CLSTN2	C6orf57	C2CD4C	C20orf151	C11orf66	CAPN13	FMO3	CRHR1
	C6orf108	CLDN18	ATM	CLU	C7orf11	C2orf24	C20orf152	C11orf67	CAPN14	FN1	CRISP3
	C6orf115	CLDN5	ATOH7	CMKLR1	C7orf23	C2orf27A	C20orf195	C11orf68	CAPN8	FNTA	CRISPLD2
	C6orf129	CLDN6	ATOH8	CMTM2	C7orf47	C2orf70	C20orf196	C11orf71	CAPN9	FOLR3	CROCCL2
	C6orf145	CLDN9	ATP10A	CNGA3	C7orf50	C2orf72	C20orf199	C11orf73	CAPNS2	FOXA3	CRTAC1
	C6orf1	CLEC12A	ATP10B	CNN1	C7orf51	C2orf79	C20orf20	C11orf75	CAPS	FOXD1	CRYM
	C6orf48	CLEC12B	ATP10D	CNR1	C7orf52	C2orf7	C20orf24	C11orf80	CARD14	FOXD2	CSDC2
	C6orf52	CLEC18A	ATP11C	CNRIP1	C7orf55	C2orf81	C20orf26	C11orf82	CARD16	FOXD4L2	CSMD2
	C6orf57	CLEC1A	ATP13A3	CNTFR	C7orf59	C2orf82	C20orf27	C11orf93	CARD9	FOXD4	CSNK2A2
	C7orf43	CLEC4A	ATP13A4	CNTLN	C7orf61	C2orf85	C20orf3	C11orf9	CASC1	FOXF1	CTAGE1
	C7orf47	CLEC4D	ATP13A5	CNTN6	C7	C3orf58	C20orf43	C12orf10	CASC3	FOXF2	CTF1
	C7orf51	CLEC4E	ATP1A2	CNTNAP1	C8orf30A	C3orf71	C20orf46	C12orf11	CASC5	FOXQ1	CTHRC1
	C7orf53	CLEC4F	ATP1A3	CNTNAP2	C8orf33	C3orf72	C20orf4	C12orf23	CASKIN1	FOXS1	CTSE
	C7orf55	CLEC4GP1	ATP1A4	COL13A1	C8orf46	C4orf26	C20orf54	C12orf29	CASP5	FRAS1	CTSG
	C7orf59	CLEC4G	ATP1B2	COL14A1	C8orf4	C4orf31	C20orf96	C12orf41	CASS4	FRMPD1	CTSK
	C7orf61	CLEC5A	ATP2A1	COL15A1	C8orf55	C4orf48	C21orf15	C12orf44	CASZ1	FRZB	CWH43
	C7orf68	CLEC7A	ATP2B2	COL18A1	C8orf58	C5orf13	C21orf29	C12orf45	CATSPER1	FSCN1	CXCL17
	C7	CLIC4	ATP2B3	COL1A1	C8orf59	C5orf38	C21orf56	C12orf47	CATSPERB	FSTL4	CXCL5
	C8ORFK29	CLK2P	ATP2B4	COL22A1	C8orf73	C5orf45	C21orf59	C12orf4	CATSPERG	FTH1	CXCR5
	C8orf30A	CLLU1OS	ATP2C2	COL23A1	C8orf76	C6orf108	C21orf90	C12orf52	CBLC	FTHL3	CXCR7
	C8orf40	CLU	ATP5EP2	COL2A1	C9orf114	C6orf123	C22orf13	C12orf57	CBS	FUT11	CXorf30
	C8orf41	CMAH	ATP5L2	COL3A1	C9orf119	C6orf124	C22orf28	C12orf60	CBX1	FUT1	CYB5R2
	C8orf42	CMIP	ATP6AP1L	COL4A1	C9orf122	C6orf125	C22orf32	C12orf62	CBX2	FUT2	CYBRD1
	C8orf55	CMTM2	ATP6V0A4	COL4A2	C9orf125	C6orf129	C22orf36	C12orf63	CBX4	FXYD2	CYGB
	C8orf58	CMTM5	ATP6V0D2	COL5A1	C9orf140	C6orf134	C22orf40	C12orf68	CCBE1	FXYD3	CYP1A1
	C8orf59	CMTM6	ATP6V0E2	COL5A3	C9orf142	C6orf136	C22orf41	C12orf70	CCDC103	FXYD5	CYP1B1
	C8orf73	CMTM7	ATP6V1B2	COL6A1	C9orf152	C6orf1	C22orf9	C12orf73	CCDC108	G0S2	CYP24A1
	C8orf76	CMTM8	ATP6V1C1	COL6A2	C9orf163	C6orf226	C2CD2L	C12orf75	CCDC113	GABRD	CYP26A1
	C9orf109	CNGA1	ATP6V1E2	COL6A3	C9orf16	C6orf26	C2CD4C	C13orf15	CCDC114	GABRP	CYP27B1
	C9orf110	CNGA3	ATP6V1G2	COL6A4P2	C9orf23	C6orf48	C2orf24	C13orf1	CCDC11	GABRR2	CYP27C1
	C9orf114	CNGA4	ATP7A	COL6A6	C9orf24	C6orf57	C2orf27A	C13orf37	CCDC120	GAPDH	CYP2A6
	C9orf119	CNKSR3	ATP7B	COL9A1	C9orf37	C6orf81	C2orf28	C14orf109	CCDC129	GAS5	CYP2B7P1
	C9orf122	CNNM1	ATP8A1	COL9A2	C9orf40	C7orf11	C2orf39	C14orf129	CCDC134	GATA2	CYP2C18
	C9orf123	CNR1	ATP8A2	COL9A3	C9orf69	C7orf13	C2orf48	C14orf142	CCDC135	GATA5	CYP2D6
	C9orf140	CNTFR	ATP8B2	COLQ	C9orf7	C7orf23	C2orf62	C14orf147	CCDC138	GATA6	CYP3A7
	C9orf142	CNTN6	ATP8B3	COPZ2	C9orf89	C7orf26	C2orf65	C14orf156	CCDC13	GATSL2	CYP4F12
	C9orf169	CNTNAP3	ATP8B4	CORO1A	C9orf9	C7orf27	C2orf7	C14orf166	CCDC147	GBE1	CYP7A1
	C9orf16	COCH	ATP8B5P	CORO2B	CA11	C7orf30	C2orf81	C14orf176	CCDC150	GBX2	CYP8B1
	C9orf23	COL11A2	ATP9A	CORO6	CA2	C7orf40	C3orf10	C14orf179	CCDC151	GCK	CYS1
	C9orf37	COL19A1	ATP9B	COTL1	CA3	C7orf43	C3orf18	C14orf182	CCDC153	GCM1	CYTL1
	C9orf40	COL21A1	ATRNL1	COX4I2	CA4	C7orf47	C3orf1	C14orf19	CCDC155	GCOM1	D2HGDH
	C9orf46	COL23A1	ATRX	COX7A1	CA9	C7orf51	C3orf37	C14orf2	CCDC157	GDA	DACH2
	C9orf64	COL25A1	ATR	CPA3	CABC1	C7orf55	C3orf47	C14orf64	CCDC158	GDF15	DACT1
	C9orf69	COL27A1	ATXN1L	CPB2	CABP1	C7orf59	C3orf52	C14orf73	CCDC160	GDPD2	DACT3
	C9orf78	COL4A1	ATXN1	CPLX1	CABP7	C7orf61	C3orf57	C14orf79	CCDC17	GDPD3	DAND5
	C9orf7	COL4A2	ATXN3	CPNE4	CACNA1H	C7orf68	C4A	C15orf24	CCDC19	GFAP	DAPK2
	C9orf86	COL4A3	ATXN7L1	CPT1C	CACNA2D2	C8ORFK29	C4orf44	C15orf33	CCDC21	GGN	DARS2
	C9orf89	COL4A4	ATXN7	CPVL	CACYBP	C8orf30A	C4orf48	C15orf40	CCDC24	GIPC3	DBH
	C9orf95	COL4A6	AURKAPS1	CPXM1	CALCA	C8orf33	C4orf49	C15orf44	CCDC3	GJA3	DCDC2
	C9orf9	COL9A1	AVIL	CPZ	CALCRL	C8orf55	C5orf23	C15orf48	CCDC40	GJA4	DCN
	CA11	COLEC10	AVL9	CR1L	CALM2	C8orf73	C5orf32	C15orf51	CCDC42B	GJB4	DCST2
	CA3	COLEC11	AVPR1A	CR1	CALM3	C8orf76	C5orf38	C15orf57	CCDC48	GJB5	DDC
	CA9	CORT	AVPR2	CREB3L1	CALML5	C8orf77	C5orf49	C15orf59	CCDC64B	GJC2	DDIT3
	CACNA1I	COTL1	AXIN2	CREB5	CALR	C9orf100	C6orf108	C15orf61	CCDC64	GKAP1	DDIT4L
	CACNG4	COX6B2	AXL	CRHBP	CAMK2N1	C9orf114	C6orf115	C15orf63	CCDC65	GLB1L3	DDIT4
	CADM4	CPB2	AZU1	CRISP3	CAMKK1	C9orf119	C6orf125	C16orf13	CCDC67	GLDN	DEF8
	CADPS	CPD	B3GALT1	CRISPLD2	CAMLG	C9orf123	C6orf129	C16orf57	CCDC68	GLRX	DEFA1B
	CALB2	CPNE4	B3GALT2	CRLF1	CAMP	C9orf140	C6orf136	C16orf58	CCDC69	GMPR	DEFB1
	CALCOCO1	CPNE5	B3GALT5	CRMP1	CAPG	C9orf142	C6orf150	C16orf61	CCDC78	GNAI1	DEPDC4
	CALM3	CPNE8	B3GALTL	CRP	CAPN10	C9orf16	C6orf154	C16orf62	CCDC81	GNAT2	DEPDC6
	CALML5	CPS1	B3GAT1	CRTAC1	CAPN12	C9orf173	C6orf165	C16orf63	CCDC85B	GNB2L1	DEPDC7
	CALR	CP	B3GAT2	CRYBG3	CAPS	C9orf23	C6orf1	C16orf80	CCDC85C	GNB3	DERL3
	CAMK1D	CR1L	B3GNT7	CRYGN	CARD10	C9orf25	C6orf203	C16orf86	CCDC87	GNG11	DES
	CAMK1G	CR1	B3GNT8	CRYM	CARHSP1	C9orf37	C6orf211	C16orf89	CCDC88C	GOLT1A	DFNB59
	CAMLG	CR2	B4GALNT1	CSDC2	CARM1	C9orf69	C6orf25	C16orf91	CCDC90A	GPC4	DGCR5
	CAMP	CREM	B4GALT6	CSF2RA	CARS	C9orf7	C6orf26	C17orf100	CCDC96	GPER	DHRSX
	CAMTA2	CRIP3	BAALC	CSF2RB	CASP12	C9orf86	C6orf27	C17orf101	CCL17	GPI	DHTKD1
	CANX	CRISPLD2	BAAT	CSF3R	CATSPER1	C9orf89	C6orf48	C17orf106	CCL18	GPR109A	DIO3OS
	CAPN10	CRLF1	BACE1	CSF3	CAV1	CA11	C7orf26	C17orf37	CCL19	GPR109B	DISC2
	CAPN1	CRP	BACH1	CSMD2	CBLC	CA9	C7orf27	C17orf44	CCL20	GPR116	DKFZP686I15217
	CAPN6	CRTAC1	BACH2	CSPG4	CBR3	CABP1	C7orf28A	C17orf48	CCL21	GPR133	DKFZp434J0226
	CAPNS1	CRYAB	BAG4	CSPG5	CBY1	CABP7	C7orf29	C17orf49	CCL22	GPR146	DLEC1
	CAPS	CSDAP1	BAGE2	CST6	CC2D1A	CACNA1F	C7orf43	C17orf60	CCL23	GPR162	DLEU7
	CAPZA2	CSDA	BAHCC1	CST7	CCBP2	CACNA1G	C7orf47	C17orf61	CCL28	GPR179	DLK2
	CAPZB	CSF2RB	BAI1	CTLA4	CCDC102A	CACNA1H	C7orf50	C17orf75	CCL3L1	GPR20	DLL1
	CBLC	CSF3R	BAI2	CTNNAL1	CCDC106	CACNB1	C7orf53	C17orf89	CCNA2	GPR44	DLL3
	CBLN1	CSF3	BAI3	CTSC	CCDC107	CACNB3	C7orf55	C17orf95	CCNB1	GPR4	DMBT1
	CBLN3	CSGALNACT1	BAMBI	CTSE	CCDC114	CACNG1	C7orf59	C18orf18	CCNB2	GPR84	DMBX1
	CBR1	CSGALNACT2	BANK1	CTSG	CCDC115	CADM1	C7orf61	C18orf21	CCNB3	GPR89C	DMC1
	CBWD1	CSMD3	BARD1	CTSL1	CCDC120	CAD	C7	C18orf22	CCNE1	GPR97	DMGDH
	CBWD3	CSNK1A1L	BASP1	CTSS	CCDC124	CALCB	C8ORFK29	C18orf32	CCNE2	GRAPL	DMKN
	CBY1	CSNK1A1P	BATF2	CTSW	CCDC127	CALM3	C8orf30A	C18orf34	CCNF	GRIA1	DMP1
	CC2D1B	CSNK1E	BATF3	CTTNBP2	CCDC12	CALML6	C8orf33	C18orf55	CCNJL	GRIN2D	DMRTA1
	CCDC101	CSRNP1	BAZ2B	CXCL17	CCDC130	CALN1	C8orf41	C18orf56	CCNO	GRIN3B	DMRTC1B
	CCDC104	CST7	BBC3	CXCL1	CCDC135	CALR	C8orf48	C18orf8	CCR3	GRK5	DNAH11
	CCDC106	CSTA	BBS10	CXCL2	CCDC137	CAMK2A	C8orf51	C19orf10	CCR9	GRK7	DNAH12
	CCDC107	CTAGE1	BBS12	CXCL3	CCDC155	CAMK2B	C8orf55	C19orf18	CCT3	GRM3	DNAH2
	CCDC111	CTAGE6	BBS5	CXCL5	CCDC19	CAMKK1	C8orf58	C19orf22	CCT5	GRM8	DNAH8
	CCDC114	CTCFL	BBS9	CXCL6	CCDC23	CAMLG	C8orf59	C19orf24	CD164L2	GSDMB	DNAJB13
	CCDC115	CTNNAL1	BBX	CXCL9	CCDC24	CAMTA2	C8orf73	C19orf33	CD24	GSDMC	DNAJB7
	CCDC124	CTNND2	BCAN	CXCR1	CCDC28B	CAP2	C8orf76	C19orf38	CD300C	GSN	DNAJC22
	CCDC12	CTSC	BCAR3	CXCR2	CCDC34	CAPN10	C9orf100	C19orf45	CD300E	GSTT1	DNASE1L3
	CCDC130	CTSE	BCAS1	CXCR3	CCDC48	CAPN12	C9orf114	C19orf46	CD300LB	GSTT2	DNASE1
	CCDC137	CTSL1	BCAT1	CXCR6	CCDC51	CAPN1	C9orf116	C19orf53	CD300LF	GTF2A1L	DNHD1
	CCDC13	CWH43	BCAT2	CXCR7	CCDC56	CAPN6	C9orf119	C19orf56	CD38	GTF2H2B	DNM1
	CCDC151	CX3CL1	BCHE	CXorf21	CCDC58	CAPNS1	C9orf140	C19orf59	CD4	GUCA1A	DOCK3
	CCDC153	CXCL13	BCL11A	CXorf30	CCDC61	CAPS	C9orf142	C19orf62	CD52	GUCA1B	DOK4
	CCDC154	CXCL17	BCL11B	CXorf36	CCDC68	CARD9	C9orf152	C19orf70	CD55	GUCY1A2	DPCR1
	CCDC163P	CXCL1	BCL2A1	CXorf50B	CCDC72	CARHSP1	C9orf167	C19orf77	CD5	GUCY1B3	DPEP1
	CCDC22	CXCL2	BCL2L14	CXorf57	CCDC74A	CARM1	C9orf16	C1D	CD68	HAP1	DPP4
	CCDC24	CXCL3	BCL2L15	CYB561D2	CCDC77	CARNS1	C9orf23	C1GALT1C1	CD72	HAPLN1	DPT
	CCDC28A	CXCL5	BCL2	CYBB	CCDC85A	CASKIN1	C9orf25	C1GALT1	CD74	HAS2AS	DPY19L2P2
	CCDC51	CXCL6	BCL6B	CYGB	CCDC85B	CASQ2	C9orf50	C1QA	CD7	HAS2	DPYS
	CCDC56	CXCR1	BCL8	CYP1B1	CCDC85C	CATSPER1	C9orf64	C1QBP	CD80	HAVCR1	DQX1
	CCDC58	CXCR2	BCL9	CYP21A2	CCDC86	CATSPER3	C9orf69	C1QB	CD82	HBA2	DSC1
	CCDC61	CXCR4	BCMO1	CYP26A1	CCDC9	CBFA2T3	C9orf78	C1QC	CD83	HBB	DSC3
	CCDC67	CXCR5	BCO2	CYP2A6	CCHCR1	CBR1	C9orf7	C1QL1	CD86	HBEGF	DSCR6
	CCDC71	CXorf36	BCORL1	CYP2A7	CCL13	CBS	C9orf86	C1QTNF1	CD9	HBG1	DSPP
	CCDC72	CXorf50B	BCOR	CYP2B7P1	CCL14	CBX2	C9orf89	C1R	CDC20	HCG22	DTX4
	CCDC81	CYBB	BDKRB1	CYP2C8	CCL16	CBX8	C9orf95	C1S	CDC25A	HCG27	DUOX1
	CCDC84	CYP11A1	BDKRB2	CYP2E1	CCL18	CC2D1A	CA2	C1orf106	CDC25C	HCG4P6	DUOX2
	CCDC85C	CYP17A1	BDNFOS	CYP2S1	CCL21	CCBL1	CA9	C1orf115	CDC34	HCG4	DUOXA1
	CCDC86	CYP19A1	BDNF	CYP3A5	CCL23	CCDC101	CABIN1	C1orf116	CDC42BPG	HCN2	DUSP13
	CCDC9	CYP1A1	BDP1	CYP3A7	CCNB1IP1	CCDC106	CABLES2	C1orf122	CDC45	HECW1	DUSP26
	CCL20	CYP1B1	BEAN	CYP4B1	CCNB1	CCDC107	CABP1	C1orf123	CDC6	HEPHL1	DUSP5P
	CCL26	CYP24A1	BEGAIN	CYP4F12	CCNB2	CCDC114	CABP7	C1orf133	CDC7	HES5	DUSP9
	CCNB1	CYP27B1	BEND3	CYP4F22	CCND3	CCDC115	CACNA1H	C1orf161	CDCA2	HES7	DYDC2
	CCNB2	CYP2A6	BEND4	CYP4F3	CCNE1	CCDC116	CACNA1I	C1orf162	CDCA5	HEYL	DYSFIP1
	CCNB3	CYP2A7	BEND5	CYP8B1	CCNO	CCDC124	CACNA2D2	C1orf163	CDCA7L	HGF	EAPP
	CCND3	CYP2B7P1	BEND6	CYR61	CCT2	CCDC12	CACNB3	C1orf174	CDCA8	HIC1	EDN2
	CCNG1	CYP2C18	BEND7	CYSLTR2	CCT3	CCDC130	CACNG1	C1orf177	CDCP1	HIF3A	EEF1A2
	CCNI	CYP2C8	BEST1	CYTH4	CCT4	CCDC136	CACNG4	C1orf182	CDH12	HIGD1B	EFCAB1
	CCNO	CYP3A5	BEST3	CYTIP	CCT6P1	CCDC137	CALCB	C1orf187	CDH13	HIGD2A	EFCAB3
	CCS	CYP3A7	BEST4	CYTL1	CCT7	CCDC142	CALHM2	C1orf194	CDH1	HIST1H1C	EFCAB6
	CCT3	CYP4F3	BEX1	CYYR1	CCT8	CCDC150	CALM2	C1orf198	CDH3	HIST1H1T	EFHA2
	CCT4	CYP7A1	BEX2	DAAM2	CD151	CCDC151	CALM3	C1orf210	CDHR2	HIST1H2AC	EGLN3
	CCT7	CYP8B1	BEX5	DACH1	CD164L2	CCDC153	CALML6	C1orf220	CDHR3	HIST1H2AD	EHHADH
	CCT8	CYSLTR2	BFSP1	DACT1	CD2BP2	CCDC154	CALR	C1orf31	CDHR4	HIST1H2AE	EID2B
	CD151	CYTH4	BHLHA15	DACT3	CD300LG	CCDC159	CAMK1G	C1orf43	CDK12	HIST1H2BC	EIF3E
	CD164L2	CYTIP	BHLHB9	DARC	CD320	CCDC163P	CAMK2N1	C1orf53	CDK18	HIST1H2BD	EIF3H
	CD177	CYTL1	BHLHE22	DBH	CD34	CCDC21	CAMK2N2	C1orf54	CDK1	HIST1H2BF	ELFN2
	CD276	CYYR1	BHMT	DCC	CD3EAP	CCDC22	CAMP	C1orf57	CDK2AP2	HIST1H2BG	ELP2P
	CD2BP2	DAB1	BICC1	DCDC2B	CD46	CCDC23	CANT1	C1orf59	CDK5RAP3	HIST1H2BJ	EMID1
	CD320	DACH1	BICD1	DCHS1	CD63	CCDC24	CAP2	C1orf66	CDKN2D	HIST1H2BK	EMILIN1
	CD63	DACT2	BIRC3	DCLK1	CD81	CCDC28B	CAPG	C1orf74	CDKN3	HIST1H2BM	EMR2
	CD72	DARC	BIRC6	DCLK3	CD82	CCDC34	CAPN10	C1orf97	CDR2L	HIST1H3D	EMR3
	CD81	DBC1	BIRC7	DCT	CD9	CCDC3	CAPN12	C20orf103	CDS1	HIST1H3E	ENO2
	CD82	DCC	BLK	DDC	CDAN1	CCDC42B	CAPN1	C20orf106	CDT1	HIST1H4B	ENOSF1
	CD99	DCUN1D3	BLOC1S3	DDIT4	CDA	CCDC51	CAPN8	C20orf132	CEACAM1	HIST1H4D	ENPP2
	CD9	DDC	BMF	DDX43	CDC20	CCDC61	CAPN9	C20orf135	CEACAM3	HIST1H4E	ENPP3
	CDAN1	DDIT3	BMP2K	DEFA1B	CDC25A	CCDC78	CAPNS1	C20orf152	CEACAM6	HIST1H4H	ENTPD3
	CDA	DDIT4	BMP2	DERL3	CDC25B	CCDC85A	CAPS	C20orf160	CEBPA	HIST2H2AA3	ENTPD8
	CDC20	DDN	BMP3	DES	CDC25C	CCDC85B	CARD10	C20orf195	CEBPB	HIST2H2BE	EPB42
	CDC25A	DDX11	BMP4	DGKG	CDC34	CCDC85C	CARD11	C20orf196	CEBPD	HK2	EPHX3
	CDC25B	DDX12	BMP5	DHCR24	CDC37	CCDC86	CARD16	C20orf199	CECR2	HK3	EPOR
	CDC25C	DDX21	BMP7	DHRS9	CDC42EP1	CCDC88B	CARKD	C20orf203	CELF3	HLA-DRB6	EPO
	CDC26	DDX60L	BMP8A	DHRSX	CDC42EP2	CCDC94	CARS2	C20orf24	CELF4	HLX	EPX
	CDC34	DEFA1B	BMP8B	DIO3OS	CDC42EP4	CCDC97	CARS	C20orf30	CELSR1	HMGA2	ERAS
	CDC37L1	DEFB1	BMPER	DIO3	CDC42EP5	CCDC9	CASKIN1	C20orf3	CELSR2	HMP19	ERC2
	CDC37	DENND1C	BMPR1B	DKFZp779M0652	CDC45	CCHCR1	CASKIN2	C20orf43	CELSR3	HOPX	ERN1
	CDC42BPG	DENND2A	BMPR2	DKK2	CDC6	CCM2	CATSPER3	C20orf4	CENPA	HOXA11	ERN2
	CDC42EP5	DENND3	BMS1P4	DKK3	CDCA3	CCNA2	CBFA2T3	C20orf7	CENPE	HOXA2	ERO1L
	CDC45	DENND5A	BMS1P5	DLC1	CDCA5	CCNB1IP1	CBLC	C21orf119	CENPF	HOXA4	ERRFI1
	CDCA3	DES	BMX	DLGAP2	CDCA7	CCNB1	CBLN3	C21orf15	CENPI	HOXA5	ERVFRDE1
	CDCA5	DGAT2	BNC2	DLL1	CDCA8	CCNB2	CBLN4	C21orf29	CENPK	HOXA6	ESR2
	CDCA8	DGCR10	BNIP3L	DLL4	CDH24	CCND3	CBR1	C21orf45	CENPM	HOXB5	ESYT3
	CDCP2	DGKB	BNIP3	DMBT1	CDH3	CCNF	CBS	C21orf70	CENPN	HOXB6	ETFA
	CDH15	DGKG	BNIPL	DMBX1	CDH5	CCNL2	CBWD3	C21orf7	CEP55	HOXD1	ETV4
	CDIPT	DHODH	BOC	DMRTA1	CDHR4	CCNO	CBX1	C22orf23	CEP70	HPCA	EVC2
	CDK10	DIAPH2	BOD1L	DNAJB13	CDIPT	CCR3	CBX2	C22orf28	CES1	HPGD	EXD1
	CDK11A	DIO3	BOLL	DNAJB1	CDK10	CCS	CBX4	C22orf32	CES4	HRCT1	EXD3
	CDK11B	DKKL1	BPI	DNAJB5	CDK11A	CCT7	CBX8	C22orf40	CETN2	HRC	EYA2
	CDK16	DLC1	BPTF	DNAJC5B	CDK16	CCT8	CBY1	C22orf41	CETP	HRH4	EYA4
	CDK18	DLEC1	BRAF	DNASE1L3	CDK18	CD151	CCDC103	C22orf43	CFD	HS6ST3	F10
	CDK20	DLG2	BRCA1	DNM3	CDK2AP2	CD177	CCDC106	C2CD4A	CFTR	HSBP1L1	F13A1
	CDK2AP2	DLGAP2	BRD1	DOC2B	CDK4	CD2BP2	CCDC107	C2CD4D	CGB7	HSD11B1	F5
	CDK4	DLGAP3	BRD7P3	DOCK10	CDK5	CD82	CCDC108	C2orf15	CGNL1	HSD11B2	F8
	CDK5RAP3	DLK1	BREA2	DOCK2	CDKL2	CD9	CCDC114	C2orf24	CGN	HSF4	FA2H
	CDK5	DLK2	BRIP1	DOCK6	CDKN1A	CDAN1	CCDC117	C2orf28	CH25H	HSPA1A	FABP4
	CDK9	DLL4	BRSK1	DOK2	CDKN1C	CDC20	CCDC11	C2orf34	CHAC1	HSPA1B	FADS1
	CDKN2AIPNL	DLX1	BRSK2	DOK6	CDKN2AIPNL	CDC25B	CCDC120	C2orf40	CHAF1B	HSPA7	FADS2
	CDKN2C	DLX2	BRWD1	DPCR1	CDKN2C	CDC25C	CCDC123	C2orf42	CHCHD10	HSPB1	FAM106C
	CDKN2D	DLX6	BRWD3	DPEP2	CDKN2D	CDC34	CCDC124	C2orf47	CHD5	HSPB2	FAM13AOS
	CDKN3	DMBT1	BSND	DPF1	CDR2L	CDC37	CCDC127	C2orf49	CHD7	HSPB8	FAM13A
	CDR2L	DMD	BSN	DPP10	CDT1	CDC42EP1	CCDC12	C2orf52	CHDH	HTR1F	FAM150B
	CDR2	DMKN	BST1	DPP4	CEACAM19	CDC42EP5	CCDC134	C2orf54	CHGB	HYAL1	FAM153A
	CDT1	DMP1	BTAF1	DPY19L2P4	CEACAM6	CDC45	CCDC137	C2orf62	CHI3L2	ICAM4	FAM153B
	CEACAM19	DMRTC1B	BTBD11	DPYD	CEBPB	CDCA2	CCDC13	C2orf69	CHIT1	ICAM5	FAM157A
	CECR5	DMXL2	BTBD12	DPYSL3	CEBPD	CDCA3	CCDC151	C2orf70	CHML	ID1	FAM157B
	CELF4	DNAH10	BTBD16	DPYSL4	CECR4	CDCA4	CCDC153	C2orf72	CHMP1B	ID4	FAM166B
	CELSR3	DNAH11	BTBD18	DPYS	CECR5	CDCA5	CCDC154	C2orf79	CHMP4C	IER3	FAM167B
	CEL	DNAH12	BTBD19	DRAM1	CEMP1	CDCA7	CCDC157	C2orf7	CHODL	IFITM3	FAM177A1
	CENPA	DNAH17	BTBD7	DRD1	CENPA	CDCA8	CCDC159	C2orf84	CHP	IFT20	FAM178B
	CENPBD1	DNAH2	BTBD8	DRP2	CENPH	CDH15	CCDC163P	C2	CHRM1	IGF2BP2	FAM180A
	CENPB	DNAH3	BTBD9	DSCAML1	CENPM	CDH23	CCDC22	C3orf10	CHRM3	IGFBP3	FAM183A
	CENPQ	DNAH5	BTC	DSG3	CENPQ	CDH24	CCDC23	C3orf14	CHRNA3	IGFBP7	FAM186A
	CENPT	DNAH6	BTK	DTHD1	CENPT	CDH2	CCDC24	C3orf18	CHRNA5	IGLON5	FAM188B
	CENPV	DNAH9	BTLA	DUOX1	CENPV	CDIPT	CCDC28A	C3orf19	CHST11	IGSF21	FAM193B
	CENPW	DNAJB13	BTN1A1	DUOXA1	CENPW	CDK10	CCDC34	C3orf1	CHST13	IGSF22	FAM196A
	CERCAM	DNAJB4	BTN2A2	DUSP13	CEP170L	CDK11A	CCDC3	C3orf32	CHST4	IKBIP	FAM196B
	CES1	DNAJB5	BTN2A3	DUSP1	CERCAM	CDK11B	CCDC40	C3orf33	CHST5	IL11	FAM19A2
	CETN2	DNAJB9	BTN3A3	DUSP26	CES1	CDK16	CCDC42B	C3orf36	CHST9	IL12A	FAM21C
	CETN3	DNAJC5B	BTNL8	DUSP2	CES3	CDK18	CCDC47	C3orf37	CHTF18	IL1A	FAM23A
	CETP	DNASE1L3	BTNL9	DUSP5P	CETN2	CDK1	CCDC51	C3orf48	CIB1	IL1B	FAM27C
	CFDP1	DNER	BVES	DUSP5	CETN3	CDK20	CCDC56	C3orf58	CISH	IL1RAP	FAM38A
	CFL1	DOC2B	BZRAP1	DYSF	CFI	CDK2AP2	CCDC61	C3orf71	CITED4	IL1RL1	FAM57B
	CH25H	DOCK2	BZW1	DZIP1L	CFL1	CDK2	CCDC64	C3orf75	CIT	IL1RN	FAM5C
	CHCHD2	DOK3	C10orf105	EBF1	CGREF1	CDK3	CCDC72	C3	CKAP2L	IL27	FAM65C
	CHCHD4	DPCR1	C10orf107	EBI3	CHAC1	CDK4	CCDC74A	C4A	CKB	IL4I1	FAM71E2
	CHCHD6	DPEP1	C10orf108	ECM1	CHAC2	CDK5R1	CCDC74B	C4BPA	CKMT1A	IL8	FAM72B
	CHCHD8	DPF1	C10orf10	ECSCR	CHADL	CDK5RAP3	CCDC78	C4orf14	CKMT1B	ILDR2	FAM72D
	CHD5	DPF3	C10orf110	EDN2	CHCHD10	CDK5	CCDC85B	C4orf19	CKM	IMPA2	FAM83A
	CHIC2	DPP10	C10orf111	EDNRA	CHCHD1	CDKN2AIPNL	CCDC85C	C4orf31	CKS1B	INA	FAM83B
	CHID1	DPP6	C10orf114	EFCAB1	CHCHD2	CDKN2A	CCDC96	C4orf32	CKS2	INHBB	FAM83D
	CHKA	DPY19L2P4	C10orf118	EFEMP2	CHCHD5	CDKN2C	CCDC9	C4orf33	CLCA2	INHBE	FAM91A1
	CHKB-CPT1B	DPYSL4	C10orf128	EFHA2	CHCHD8	CDKN2D	CCHCR1	C4orf3	CLDN10	INMT	FANCA
	CHMP1A	DPYS	C10orf12	EFHD2	CHDH	CDKN3	CCL20	C4orf44	CLDN16	INSC	FAP
	CHMP2A	DRAM1	C10orf131	EFNB1	CHEK2	CDR2L	CCL26	C4orf47	CLDN18	INSM1	FBLL1
	CHMP4A	DRD1	C10orf140	EFNB2	CHERP	CDRT15P	CCL4L2	C4orf52	CLDN1	ISL2	FBLN1
	CHMP4B	DSC3	C10orf25	EGFL6	CHI3L1	CDT1	CCM2	C4orf6	CLDN23	ITGA1	FBLN2
	CHMP5	DSG3	C10orf26	EGFL7	CHMP1A	CEACAM19	CCNA2	C5orf15	CLDN2	ITGA2	FBN3
	CHMP7	DTNA	C10orf28	EGFLAM	CHMP4B	CECR5	CCNB1	C5orf22	CLDN3	ITGA8	FBXL22
	CHODL	DTX1	C10orf41	EGR1	CHMP5	CELF5	CCNB2	C5orf23	CLDN4	ITGB3	FBXL8
	CHPT1	DUOX1	C10orf46	EGR2	CHN1	CELSR3	CCND1	C5orf27	CLDN5	ITPKA	FBXO15
	CHRAC1	DUOXA1	C10orf4	EGR3	CHPF	CEL	CCNE1	C5orf32	CLDN6	IYD	FBXO17
	CHRD	DUSP26	C10orf50	EGR4	CHRDL2	CENPA	CCNF	C5orf33	CLDN7	IZUMO1	FBXO43
	CHRNB1	DUSP6	C10orf54	EIF4E3	CHRD	CENPB	CCR10	C5orf45	CLDN8	JAKMIP2	FCAR
	CHRNE	DYNC1I1	C10orf55	ELANE	CHRNA5	CENPF	CCS	C5orf62	CLDN9	JAM3	FCER2
	CHST14	DYSFIP1	C10orf68	ELAVL3	CHRNB1	CENPH	CCT2	C5	CLEC4D	JMJD6	FCGBP
	CHST7	DYSF	C10orf72	ELFN1	CHST8	CENPK	CCT3	C6orf115	CLEC5A	JPH3	FCGR2A
	CIAPIN1	EAF1	C10orf78	ELFN2	CHTF18	CENPM	CCT4	C6orf122	CLGN	KANK3	FCGR2B
	CIB1	ECEL1	C10orf79	ELMOD1	CHTF8	CENPO	CCT5	C6orf123	CLIC3	KAT2B	FCGR2C
	CILP2	ECSCR	C10orf81	ELN	CIAPIN1	CENPT	CCT7	C6orf124	CLIC5	KCNA7	FCRL1
	CINP	ECT2L	C10orf82	ELOVL2	CIB1	CENPV	CCT8	C6orf126	CLLU1OS	KCNE3	FCRL2
	CISD2	EDN1	C10orf90	ELTD1	CIB2	CENPW	CD151	C6orf127	CLN3	KCNE4	FCRL5
	CISD3	EDNRB	C10orf93	EMB	CIDECP	CEP55	CD19	C6orf129	CLPB	KCNH7	FCRLB
	CITED1	EFCAB10	C10orf95	EMCN	CISD3	CERCAM	CD22	C6orf136	CLPTM1L	KCNJ1	FDFT1
	CITED2	EFCAB1	C11orf16	EMID1	CISH	CES3	CD2BP2	C6orf142	CLSPN	KCNJ8	FER1L4
	CITED4	EFCAB3	C11orf21	EMILIN1	CITED4	CFDP1	CD300A	C6orf150	CLUL1	KCNK13	FER1L5
	CIZ1	EFCAB6	C11orf34	EMILIN3	CKB	CFL1	CD300LF	C6orf153	CMTM8	KCNK17	FER1L6
	CKB	EFHC2	C11orf41	EMR1	CKMT1A	CGB7	CD320	C6orf192	CN5H6.4	KCNK3	FGA
	CKLF	EFHD2	C11orf42	EMR4P	CKMT1B	CHAD	CD46	C6orf1	CNFN	KCNK4	FGB
	CKS1B	EFNB2	C11orf45	EMX1	CKS1B	CHAF1A	CD63	C6orf203	CNGA1	KCNK5	FGF11
	CKS2	EGFL7	C11orf61	ENDOG	CKS2	CHCHD1	CD7	C6orf223	CNGA4	KCNK6	FGF14
	CLCN7	EGLN3	C11orf63	ENG	CLCN7	CHCHD2	CD81	C6orf25	CNIH2	KCNN2	FGF18
	CLCNKA	EHBP1L1	C11orf65	EPAS1	CLCNKA	CHCHD5	CD9	C6orf26	CNKSR1	KCNS3	FGF7
	CLDN10	EIF1B	C11orf66	EPB41L3	CLCNKB	CHD3	CDAN1	C6orf27	CNNM1	KCNT1	FGF9
	CLDN23	EIF5AL1	C11orf70	EPB42	CLDN18	CHERP	CDA	C6orf41	CNTD2	KCP	FGG
	CLDN3	ELANE	C11orf88	EPDR1	CLDN4	CHID1	CDC20	C6orf48	CNTF	KCTD15	FGL1
	CLDN4	ELF5	C11orf90	EPHA6	CLDN5	CHKB	CDC25B	C6orf52	CNTN6	KCTD16	FHAD1
	CLDN7	ELL2	C11orf92	EPHB2	CLDN6	CHMP1A	CDC25C	C6orf57	CNTNAP2	KCTD19	FIBIN
	CLDN8	ELL	C11orf93	EPHX3	CLDN7	CHMP6	CDC26	C6orf62	COBL	KDELR3	FIGF
	CLDN9	ELOVL2	C11orf9	EPSTI1	CLDN9	CHN1	CDC34	C6orf72	COBRA1	KDR	FIGNL2
	CLDND1	ELOVL7	C12orf24	ERAP2	CLEC11A	CHN2	CDC37	C6orf81	COL13A1	KHDRBS3	FLJ13197
	CLEC11A	ELTD1	C12orf26	ERG	CLEC14A	CHPF	CDC42EP1	C6	COL19A1	KIAA1045	FLJ14107
	CLEC4E	EMILIN2	C12orf34	ERICH1	CLEC1A	CHRD	CDC42EP5	C7orf28A	COL22A1	KIAA1191	FLJ16779
	CLGN	EML6	C12orf35	ERVFRDE1	CLEC3B	CHRFAM7A	CDC45	C7orf28B	COL23A1	KIAA1462	FLJ22536
	CLK1	EMR1	C12orf49	ESAM	CLEC4D	CHRNA1	CDC6	C7orf47	COL28A1	KIAA1751	FLJ34503
	CLK3	EMR2	C12orf51	ESM1	CLEC4E	CHRNA5	CDCA3	C7orf50	COL2A1	KIAA1984	FLJ35390
	CLLU1OS	EMR3	C12orf53	ESPNL	CLIC1	CHRNB1	CDCA4	C7orf55	COL4A3	KIF17	FLJ35776
	CLN3	EMR4P	C12orf59	ESR1	CLIC3	CHRNE	CDCA5	C7orf57	COL4A4	KIRREL2	FLJ36777
	CLPB	ENDOU	C12orf5	ESYT3	CLLU1OS	CHRNG	CDCA8	C7orf58	COL4A5	KISS1R	FLJ37201
	CLPP	ENG	C12orf61	EVI2B	CLN3	CHST12	CDH13	C7orf59	COL7A1	KISS1	FLJ37453
	CLPTM1	ENKUR	C12orf63	EXOC3L2	CLN6	CHST14	CDH1	C7orf60	COL9A1	KITLG	FLJ39739
	CLSTN1	ENPP2	C12orf66	EXOC3L	CLPTM1L	CHST6	CDH24	C7orf61	COL9A3	KLC3	FLJ40292
	CLTB	EPAS1	C12orf68	EYA1	CLTA	CHST8	CDHR4	C7	COLEC10	KLHL4	FLJ40330
	CMC1	EPB41L3	C12orf69	F10	CLTB	CHTF18	CDIPT	C8G	COMTD1	KLK14	FLJ40852
	CMIP	EPB42	C12orf70	F2RL3	CLUL1	CIB1	CDK10	C8orf40	CORO1B	KLK1	FLJ41941
	CMTM3	EPHA6	C12orf71	F2R	CLU	CIB2	CDK11A	C8orf41	CORO2A	KL	FLJ42709
	CMTM7	EPHA7	C12orf72	F2	CLVS1	CIC	CDK16	C8orf47	COX4I2	KPNA7	FLJ42875
	CMTM8	EPHA8	C12orf76	F3	CMBL	CILP2	CDK18	C8orf4	COX5A	KRT13	FLJ43663
	CNFN	EPHB1	C13orf18	F7	CMC1	CINP	CDK1	C8orf59	COX5B	KRT16	FLJ44606
	CNIH3	EPO	C13orf29	F8	CNFN	CIRBP	CDK20	C8orf76	COX6B2	KRT17	FLJ45244
	CNIH4	ERC2	C13orf33	FABP4	CNKSR1	CIT	CDK2AP2	C8orf85	COX8A	KRT1	FMO1
	CNN2	EREG	C14orf102	FAM124B	CNN1	CIZ1	CDK4	C9orf103	CPA4	KRT4	FMO2
	CNOT3	ERG	C14orf106	FAM129C	CNNM1	CKAP2L	CDK5RAP1	C9orf122	CPAMD8	KRT6A	FMOD
	CNOT8	ERICH1	C14orf118	FAM132A	CNO	CKB	CDK5RAP3	C9orf123	CPB2	KRT6B	FNDC1
	CNO	ERN2	C14orf128	FAM13C	CNPY2	CKM	CDK5	C9orf125	CPLX2	KRT6C	FOLR1
	CNPY2	ERO1L	C14orf132	FAM149A	CNTD2	CKS1B	CDKL2	C9orf142	CPLX3	KRT79	FOLR2
	CNPY3	ERRFI1	C14orf139	FAM150B	CNTN6	CKS2	CDKN1A	C9orf152	CPNE4	KRT80	FOXA3
	CNPY4	ESAM	C14orf145	FAM153A	CNTROB	CLCN2	CDKN1B	C9orf153	CP	KRT86	FOXD2
	CNP	ESR2	C14orf148	FAM153B	COASY	CLCN7	CDKN2AIPNL	C9orf21	CR1L	KRTCAP2	FOXF1
	CNTFR	ESYT3	C14orf159	FAM155B	COBRA1	CLCNKA	CDKN2D	C9orf23	CRB3	KTN1	FOXN4
	CNTN1	ETFA	C14orf174	FAM159A	COL18A1	CLCNKB	CDKN3	C9orf44	CREB3L4	L1CAM	FOXQ1
	CNTROB	ETS1	C14orf176	FAM162B	COL21A1	CLDN15	CDR2L	C9orf46	CRIP2	LAMC3	FUK
	COASY	ETS2	C14orf178	FAM166B	COL23A1	CLDN5	CDX1	C9orf64	CRISP3	LASS1	FUT11
	COBRA1	EVI2B	C14orf180	FAM167A	COL4A2	CLDN9	CEACAM19	C9orf78	CRTAC1	LASS3	FUT3
	COL22A1	EVPLL	C14orf182	FAM167B	COL5A3	CLDND2	CEACAM6	C9orf89	CRYBB3	LBH	FUT6
	COL23A1	EXD1	C14orf184	FAM176B	COL9A3	CLEC11A	CEBPA	C9orf95	CRYM	LCN2	FXYD1
	COL6A1	EXOC3L2	C14orf19	FAM183B	COLEC11	CLEC18A	CECR2	C9orf9	CSDAP1	LDB2	FXYD7
	COL6A2	F12	C14orf28	FAM189A1	COMMD10	CLEC2L	CECR5	CA14	CSF3R	LDHA	G2E3
	COL7A1	F13A1	C14orf33	FAM196B	COMMD4	CLIC3	CELF3	CA1	CSF3	LEAP2	GABBR1
	COLEC11	F2RL3	C14orf34	FAM19A1	COMMD6	CLK2P	CELSR1	CA3	CSMD3	LEPREL2	GABRB2
	COMMD3	F3	C14orf37	FAM20A	COMMD7	CLK2	CELSR2	CA9	CSNK1G2	LETM2	GABRE
	COMMD4	F5	C14orf43	FAM23A	COMMD8	CLK3	CELSR3	CAB39L	CSPG4	LGALS1	GADD45A
	COMMD6	F8	C14orf45	FAM26F	COMTD1	CLLU1OS	CEL	CACNA2D2	CSPG5	LGALS3	GAL3ST2
	COMMD7	FABP4	C14orf49	FAM38B	COMT	CLLU1	CEMP1	CACNG1	CST6	LGI4	GALE
	COMMD8	FAM101A	C14orf64	FAM3D	COPE	CLN3	CENPA	CACYBP	CST7	LHFP	GALNS
	COMTD1	FAM107A	C14orf73	FAM43A	COPG2	CLPB	CENPB	CALCA	CSTB	LHX2	GALNT5
	COMT	FAM115C	C15orf21	FAM43B	COPS7A	CLPP	CENPM	CALCRL	CTAGE4	LILRA3	GALNT9
	COPE	FAM124A	C15orf26	FAM65A	COPS7B	CLPTM1L	CENPT	CALCR	CTAGE6	LIN37	GANC
	COPS3	FAM126A	C15orf27	FAM65B	COPZ1	CLTB	CENPV	CALD1	CTAGE9	LIN7A	GAN
	COPS4	FAM129C	C15orf28	FAM65C	COQ10A	CLTCL1	CEP250	CALM1	CTDP1	LINGO1	GAS1
	COPS6	FAM138F	C15orf29	FAM69B	COQ3	CMC1	CEP55	CALM2	CTNNAL1	LIPG	GAS6
	COPS7A	FAM13AOS	C15orf33	FAM70B	COQ4	CMTM4	CERCAM	CALM3	CTNNBIP1	LIPH	GAS8
	COPS7B	FAM150B	C15orf34	FAM78A	COQ5	CNFN	CES1	CALML3	CTNND2	LITAF	GATA1
	COPZ1	FAM153A	C15orf37	FAM78B	COQ6	CNIH2	CETN2	CALML5	CTSD	LOC100127888	GATA5
	COQ5	FAM153B	C15orf39	FAM7A2	COQ9	CNKSR3	CETN3	CALML6	CTSE	LOC100130148	GATA6
	COQ9	FAM154A	C15orf48	FAM83E	CORT	CNOT3	CETP	CALR	CTSL2	LOC100132247	GCKR
	CORO1B	FAM155A	C15orf51	FAM89A	COX16	CNPY3	CFL1	CAMK2N1	CTSS	LOC100133612	GDF10
	CORO7	FAM157A	C15orf54	FAM92B	COX17	CNPY4	CGB7	CAMK2N2	CTXN1	LOC100134868	GDF15
	CORT	FAM162B	C15orf55	FAM95B1	COX4I1	CNTD2	CGN	CAMK4	CUEDC1	LOC100144604	GDF9
	COX17	FAM163A	C15orf56	FAP	COX4I2	CNTFR	CHAC1	CAMKK1	CWH43	LOC100216001	GDPD1
	COX4I1	FAM166A	C15orf58	FAR2	COX4NB	CNTNAP1	CHADL	CAMP	CX3CL1	LOC100268168	GDPD3
	COX4I2	FAM166B	C15orf59	FASLG	COX5A	CNTROB	CHAD	CAMTA1	CXADRP3	LOC100271831	GDPD5
	COX4NB	FAM177B	C15orf5	FBLN1	COX5B	COASY	CHCHD10	CAND1	CXADR	LOC134466	GEFT
	COX5A	FAM178B	C15orf62	FBP1	COX6A1	COBRA1	CHCHD1	CANX	CXCL10	LOC143188	GFRA3
	COX5B	FAM179A	C16orf3	FBXL7	COX6B1	COG4	CHCHD2	CAP1	CXCL11	LOC148189	GGT3P
	COX6A1	FAM184A	C16orf45	FCAR	COX6B2	COG7	CHCHD4	CAP2	CXCL16	LOC150381	GGT7
	COX6B1	FAM190A	C16orf46	FCER1G	COX6C	COL11A2	CHCHD5	CAPG	CXCL17	LOC158376	GGT8P
	COX6C	FAM196B	C16orf52	FCGR1A	COX7A1	COL13A1	CHEK2	CAPN11	CXCL1	LOC158696	GINS2
	COX7A2L	FAM19A1	C16orf54	FCGR1C	COX7A2	COL16A1	CHGB	CAPN1	CXCL2	LOC221442	GIPC2
	COX7A2	FAM20A	C16orf55	FCGR2A	COX7B	COL19A1	CHKA	CAPN2	CXCL3	LOC283050	GJA5
	COX7B	FAM23A	C16orf5	FCGR2B	COX7C	COL1A1	CHKB-CPT1B	CAPNS1	CXCL5	LOC283070	GJB2
	COX7C	FAM27A	C16orf68	FCGR3A	COX8A	COL1A2	CHKB	CAPNS2	CXCL6	LOC284276	GJB3
	COX8A	FAM27C	C16orf71	FCGR3B	CPA3	COL23A1	CHMP1A	CAPZA2	CXCL9	LOC349196	GLI1
	CPNE1	FAM3D	C16orf73	FCGRT	CPLX1	COL25A1	CHMP1B	CAPZB	CXCR1	LOC389458	GLI2
	CPNE2	FAM40B	C16orf81	FCN1	CPLX3	COL27A1	CHMP2A	CARD16	CXCR2	LOC389493	GLIPR1L2
	CPNE9	FAM49A	C16orf86	FCN2	CPNE1	COL2A1	CHMP4A	CARS	CXorf30	LOC389705	GLIS1
	CPOX	FAM5C	C16orf89	FCN3	CPNE2	COL5A1	CHMP4B	CASC3	CYB5A	LOC389791	GLS2
	CPO	FAM65B	C17orf103	FCRL1	CPNE7	COL5A3	CHMP5	CASKIN2	CYB5R2	LOC407835	GLT8D2
	CPSF1	FAM70B	C17orf104	FCRL2	CPSF1	COL6A1	CHN1	CASP1	CYCS	LOC440356	GNA15
	CPT1B	FAM71E2	C17orf107	FCRL3	CPSF3L	COL6A2	CHPF	CASP4	CYFIP2	LOC442454	GNAL
	CRABP2	FAM72A	C17orf108	FCRLA	CPT1B	COL7A1	CHRAC1	CASP5	CYP17A1	LOC442459	GNB3
	CRADD	FAM72B	C17orf39	FER1L6	CPT1C	COL8A2	CHRD	CASP6	CYP24A1	LOC541471	GNE
	CRAT	FAM72D	C17orf44	FERMT3	CRABP1	COL9A1	CHRNA10	CASQ2	CYP27B1	LOC554202	GNG4
	CRB3	FAM83A	C17orf46	FEZ1	CRABP2	COL9A2	CHRNA7	CASS4	CYP2A7	LOC55908	GNRHR
	CREB3	FAM83B	C17orf47	FFAR2	CREB3L4	COL9A3	CHRNB4	CAST	CYP2B7P1	LOC613037	GOLGA2B
	CRELD1	FAM86B2	C17orf51	FFAR3	CRHR1	COMMD4	CHST14	CAT	CYP2C18	LOC645166	GOLGA6A
	CRIP1	FAM89A	C17orf53	FGA	CRIP2	COMMD5	CHST1	CAV1	CYP2J2	LOC729668	GOLGA6B
	CRIP2	FAM92B	C17orf55	FGB	CRIPAK	COMTD1	CHST8	CBARA1	CYP2S1	LOC731789	GOLGA6L10
	CRISPLD1	FAM95B1	C17orf57	FGD2	CRLF1	COMT	CHTF18	CBLC	CYP2W1	LOC90246	GOLGA6L9
	CROCCL1	FAR2	C17orf66	FGD5	CRP	COPE	CIAPIN1	CBLL1	CYP4B1	LOC91450	GOLGA8B
	CRTAC1	FBLIM1	C17orf67	FGF18	CRTAP	COPG2	CIB1	CBLN4	CYP4F11	LOC92973	GOLT1A
	CRTAP	FBN3	C17orf68	FGF9	CRTC2	COPS6	CIB2	CBR1	CYP4F3	LOXL2	GPAT2
	CRTC2	FBXL13	C17orf69	FGFR4	CRYAB	COPS7A	CIDEB	CBWD1	CYP4Z1	LOX	GPC3
	CRYAB	FBXO15	C17orf71	FGG	CRYGS	COPS7B	CIDECP	CBWD2	CYP4Z2P	LPHN3	GPC6
	CRYGS	FBXO39	C17orf72	FGL1	CRYZ	COQ3	CISD2	CBWD3	CYP51A1	LPO	GPIHBP1
	CRYL1	FBXW10	C17orf76	FGR	CSDA	COQ5	CISD3	CBWD6	CYSLTR2	LPPR2	GPR110
	CRYZL1	FCAR	C17orf82	FHL1	CSDC2	COQ6	CKAP2L	CBX3	CYTH1	LPPR3	GPR133
	CSDC2	FCER1G	C17orf87	FHL2	CSE1L	CORO1A	CKB	CBY1	CYTH2	LRCH2	GPR135
	CSK	FCER2	C17orf96	FHL5	CSNK2A2	CORO1B	CKLF	CC2D2B	CYTIP	LRP1B	GPR146
	CSNK1D	FCGR1A	C17orf97	FIBCD1	CSNK2B	CORO6	CKMT1A	CCBE1	DACH1	LRP2BP	GPR162
	CSRNP1	FCGR1B	C18orf10	FIBIN	CSRP2	CORO7	CKMT1B	CCBL2	DACT2	LRRC16A	GPR179
	CSRP2	FCGR1C	C18orf16	FIGF	CSTB	CORT	CKS1B	CCDC104	DAND5	LRRC32	GPR182
	CSTB	FCGR2A	C18orf18	FILIP1L	CTAGE1	COX16	CKS2	CCDC109A	DAP3	LRRC36	GPR1
	CSTF2	FCGR3B	C18orf19	FILIP1	CTDSP1	COX4I1	CLCF1	CCDC109B	DAPK2	LRRC4B	GPR20
	CTBP1	FCN1	C18orf1	FLI1	CTF1	COX5A	CLCN2	CCDC111	DAPP1	LSR	GPR45
	CTCFL	FCN3	C18orf25	FLJ14107	CTNNAL1	COX5B	CLCN7	CCDC113	DAZAP1	LTBP4	GPR61
	CTDSP1	FCRL1	C18orf34	FLJ34503	CTNNBIP1	COX6B1	CLCNKB	CCDC115	DBF4	LTK	GPR68
	CTDSPL	FCRL2	C19orf23	FLJ40292	CTNNBL1	COX6B2	CLDN12	CCDC122	DBI	LY6G5C	GPR81
	CTNNBIP1	FCRL5	C19orf25	FLJ42875	CTNND2	COX6C	CLDN15	CCDC124	DBNDD1	LY6G6C	GPR88
	CTSD	FCRLA	C19orf26	FLNC	CTSA	COX7A2	CLDN23	CCDC126	DCAF4L1	LY6K	GPR97
	CTSF	FCRLB	C19orf34	FLRT3	CTSC	COX7C	CLDN3	CCDC127	DCC	LYG1	GPRASP1
	CTSL1	FER1L4	C19orf35	FLT1	CTSE	COX8A	CLDN4	CCDC132	DCDC1	LZTS1	GPRC5D
	CTSL2	FERMT1	C19orf36	FLT3LG	CTSF	CPA4	CLDN5	CCDC135	DCDC2B	MACROD2	GPRIN2
	CTSZ	FERMT3	C19orf38	FLT4	CTU1	CPAMD8	CLDN7	CCDC137	DCDC2	MAFF	GPT2
	CTTN	FES	C19orf39	FMNL1	CTU2	CPE	CLDN9	CCDC148	DCST1	MAF	GPX3
	CTU1	FFAR2	C19orf44	FMO1	CTXN1	CPN2	CLEC11A	CCDC151	DCXR	MAL2	GRAMD2
	CTU2	FFAR3	C19orf45	FMO2	CUEDC2	CPNE5	CLEC14A	CCDC154	DDC	MALL	GRB14
	CTXN1	FGA	C19orf51	FMO3	CUL7	CPNE7	CLEC3B	CCDC22	DDR1	MAP1LC3B2	GRB7
	CUEDC2	FGB	C19orf57	FMOD	CUTA	CPSF1	CLGN	CCDC23	DDRGK1	MAP3K15	GREB1L
	CUL7	FGD4	C19orf59	FOLR3	CWC15	CPSF3L	CLIC1	CCDC25	DDTL	MAPK8IP2	GREM1
	CUTA	FGF13	C19orf73	FOSB	CWH43	CPSF4	CLIC3	CCDC28A	DEDD2	MAPRE2	GREM2
	CWC15	FGF2	C19orf76	FOS	CX3CL1	CPT1B	CLK2P	CCDC34	DEFA1B	2018-03-03	GRHL1
	CWC25	FGF7	C19orf77	FOXF1	CXCL17	CRABP2	CLK2	CCDC3	DEFB1	2018-03-04	GRID2IP
	CXCL5	FGFR4	C1QL1	FOXF2	CXCL1	CREB3L1	CLN3	CCDC42B	DEGS2	2018-03-09	GRIN2B
	CXCR1	FGG	C1QL2	FOXN4	CXCL3	CREB3L4	CLPP	CCDC46	DENND1B	MARCO	GRIN3B
	CXXC1	FGL1	C1QL3	FOXS1	CXCL5	CREG2	CLPTM1L	CCDC51	DENND1C	MAST1	GSDMB
	CXorf40B	FGR	C1QL4	FPGS	CXCL6	CRELD1	CLPTM1	CCDC56	DENND2D	MATK	GSTM2P1
	CYB561D2	FHIT	C1QTNF1	FPR1	CXCR1	CRELD2	CLTA	CCDC58	DEPDC1B	MBD2	GSTM2
	CYB561	FHL5	C1QTNF2	FPR2	CXCR2	CRHR1	CLTB	CCDC65	DEPDC1	MBP	GSTM5
	CYB5A	FIGF	C1QTNF3	FREM1	CXorf30	CRIP2	CLTC	CCDC67	DES	MCART2	GTF2A1L
	CYB5R2	FILIP1	C1QTNF4	FSD1	CXorf36	CRIP3	CMBL	CCDC68	DGCR10	MCHR1	GTF2H2
	CYB5R3	FJX1	C1QTNF7	FSTL3	CYB561D2	CRLF1	CMC1	CCDC71	DGCR6	MECOM	GUCA1A
	CYB5RL	FKBP1AP1	C1QTNF9B	FSTL4	CYB561	CROCCL1	CMTM8	CCDC72	DGKD	MED31	GUCY1B2
	CYBASC3	FKBP1A	C1QTNF9	FTHL3	CYB5A	CROCC	CNDP1	CCDC77	DHCR24	MEGF11	GULP1
	CYC1	FKBP5	C1R	FXYD1	CYB5R3	CRTAC1	CNFN	CCDC84	DHCR7	MFGE8	GUSBL1
	CYFIP2	FKBP6	C1S	FYB	CYC1	CRTC1	CNGA4	CCDC85B	DHDH	MFSD6L	GUSBP3
	CYHR1	FKSG29	C1orf101	FZD2	CYHR1	CRTC2	CNKSR1	CCDC86	DHRS11	MGAM	GXYLT2
	CYP26A1	FLJ14107	C1orf104	FZD4	CYP21A2	CRYBB3	CNOT3	CCDC89	DHRS13	MGC16025	GYG2
	CYP26B1	FLJ36031	C1orf107	G0S2	CYP26B1	CRYGS	CNO	CCDC94	DHRS2	MGC16121	GYLTL1B
	CYP2B7P1	FLJ40292	C1orf111	GAB3	CYP27A1	CSAD	CNPY2	CCDC9	DHTKD1	MGC42105	GYS2
	CYP2D6	FLJ43663	C1orf114	GABRA2	CYP2B7P1	CSDC2	CNPY3	CCIN	DIAPH3	MGC45800	H19
	CYP2D7P1	FLJ44054	C1orf116	GABRB2	CYP39A1	CSK	CNPY4	CCL13	DIO1	MGLL	H2AFY2
	CYYR1	FLJ44635	C1orf125	GABRD	CYP4B1	CSMD1	CNST	CCL14	DKC1	MGST3	H2BFXP
	D2HGDH	FLJ45244	C1orf126	GABRR2	CYS1	CSNK1E	CNTD2	CCL17	DKFZp779M0652	MICA	HABP2
	DAB2IP	FLJ45445	C1orf127	GADD45A	CYTL1	CSNK1G2	CNTFR	CCL18	DKK1	MIOX	HAND2
	DAD1	FLT1	C1orf130	GADD45B	CYYR1	CSNK2B	CNTNAP2	CCL20	DKKL1	MMP12	HAPLN4
	DAG1	FLT3	C1orf135	GADD45G	D2HGDH	CSPG4	COASY	CCL21	DLEC1	MMP15	HAS2AS
	DALRD3	FLT4	C1orf152	GAL3ST2	DAB2IP	CSRP2	COBRA1	CCL23	DLG3	MMP8	HAS2
	DARS	FLVCR2	C1orf161	GALNT14	DACH1	CST6	COG2	CCL26	DLGAP1	MMP9	HAUS4
	DAXX	FMN2	C1orf168	GALNT9	DACH2	CTBP1	COG7	CCL3	DLGAP5	MMRN1	HAUS7
	DAZAP1	FMNL1	C1orf170	GALNTL1	DACT2	CTCFL	COL13A1	CCL4L2	DLK1	MNAT1	HAVCR1
	DBC1	FMO2	C1orf173	GALNTL4	DAD1	CTDSP1	COL18A1	CCL5	DLK2	MOCS1	HBA1
	DBI	FMO3	C1orf175	GAP43	DAK	CTPS	COL2A1	CCNA1	DLL3	MPPED2	HBD
	DBN1	FMO6P	C1orf177	GAPT	DALRD3	CTSD	COL4A1	CCNB1IP1	DLL4	MS4A14	HCG11
	DBNDD1	FOLH1	C1orf183	GATA1	DAND5	CTSF	COL4A2	CCNB1	DLX3	MS4A15	HCG27
	DBNDD2	FOLR3	C1orf186	GATA2	DAP3	CTSL2	COL6A4P2	CCNC	DLX4	MT1H	HCG2P7
	DBP	FOSL1	C1orf187	GATA5	DARC	CTU1	COL9A2	CCND3	DMBT1	MT3	HCN3
	DCAF13	FOXA3	C1orf190	GATA6	DAXX	CTU2	COLEC11	CCNDBP1	DMBX1	MTMR7	HDC
	DCAKD	FOXC1	C1orf192	GBGT1	DBN1	CTXN1	COMMD4	CCNE1	DMKN	MUC1	HEATR4
	DCI	FOXC2	C1orf201	GCKR	DBNDD1	CUEDC1	COMMD5	CCNE2	DMRTA1	MUC4	HEATR5A
	DCK	FOXF1	C1orf203	GCK	DBNDD2	CUEDC2	COMMD7	CCNG1	DNA2	MXD1	HECTD1
	DCPS	FOXL1	C1orf213	GCNT4	DCAF15	CUL7	COMTD1	CCNI	DNAH10	MXI1	HECW1
	DCST2	FPR1	C1orf21	GDF10	DCI	CUTA	COMT	CCNY	DNAH11	MYBPH	HEMGN
	DCTD	FPR2	C1orf220	GDF15	DCPS	CXCL13	COPE	CCRL2	DNAH12	MYL12B	HES7
	DCTN2	FRAS1	C1orf226	GDF1	DCST2	CXCR4	COPG	CCS	DNAH14	MYL4	HGFAC
	DCTN3	FSCN3	C1orf228	GDF6	DCTD	CXXC1	COPS6	CCT2	DNAH2	MYO5B	HGF
	DCTN6	FSTL3	C1orf229	GDPD2	DCTN2	CXXC5	COPS7A	CCT3	DNAH3	MYOF	HHIPL2
	DCTPP1	FTHL3	C1orf26	GEM	DCTN3	CXorf30	COPZ1	CCT4	DNAH5	N4BP3	HHLA3
	DCUN1D5	FUNDC2P2	C1orf38	GFI1	DCTPP1	CXorf40B	COQ5	CCT5	DNAH6	NACA2	HIC1
	DCXR	FUT7	C1orf56	GFPT2	DCXR	CXorf50B	CORO1B	CCT6A	DNAH7	NACAD	HIF3A
	DDAH2	FZD10	C1orf58	GFRA2	DDA1	CYB5R1	CORO2A	CCT6P1	DNAH8	NAMPT	HIST1H1B
	DDIT3	G0S2	C1orf61	GGN	DDAH2	CYB5R3	CORO7	CCT7	DNAH9	NANOS1	HIST1H1E
	DDIT4	GABARAPL3	C1orf69	GGT5	DDIT3	CYC1	COX16	CCT8	DNAI1	NAPSA	HIST1H1T
	DDOST	GABBR2	C1orf70	GGTLC1	DDIT4	CYHR1	COX17	CD151	DNAJA1	NAT8B	HIST1H2AD
	DDRGK1	GABRE	C1orf83	GIMAP1	DDN	CYP2D6	COX4I1	CD163	DNAJA4	NCALD	HIST1H2AE
	DDT	GABRR2	C1orf84	GIMAP2	DDOST	CYP2D7P1	COX4I2	CD164L2	DNAJB13	NCRNA00081	HIST1H2AG
	DDX11L2	GADD45B	C1orf88	GIMAP4	DDT	CYP2J2	COX5B	CD177	DNAJB1	NCRNA00152	HIST1H2AH
	DDX11	GALNT8	C1orf89	GIMAP5	DDX11	CYTH2	COX6A1	CD200R1	DNAJC5B	NCRNA00189	HIST1H2AK
	DDX12	GALNT9	C1orf92	GIMAP6	DDX12	D2HGDH	COX6B1	CD200	DNAJC5	NDRG1	HIST1H2AL
	DDX19B	GAL	C1orf93	GIMAP7	DDX39	DAAM2	COX6C	CD22	DNAJC6	NDRG4	HIST1H2BF
	DDX23	GAN	C1orf95	GIMAP8	DDX49	DACT3	COX7A1	CD248	DNASE1L2	NDUFA4L2	HIST1H2BG
	DDX39	GAPDHS	C1orf96	GIPC2	DECR2	DAD1	COX7A2L	CD24	DNASE2B	NEBL	HIST1H2BJ
	DDX41	GAS2L2	C1orf9	GIYD2	DEF8	DAK	COX7A2	CD300A	DNLZ	NEDD4L	HIST1H2BL
	DDX47	GATA1	C20orf103	GJA1	DEFA1B	DALRD3	COX7B	CD300C	DNM2	NEFL	HIST1H2BN
	DDX49	GATA5	C20orf106	GJA4	DEFB1	DAND5	COX7C	CD300LF	DNMT3B	NEFM	HIST1H2BO
	DDX51	GATA6	C20orf107	GJC1	DEGS1	DAPK2	COX8A	CD302	DOC2A	NEURL3	HIST1H3B
	DDX54	GCA	C20orf111	GJD3	DENND2A	DAPK3	CPLX1	CD320	DOCK3	NFATC1	HIST1H3J
	DECR1	GCGR	C20orf112	GK	DENND4B	DAXX	CPNE1	CD34	DOK7	NFE2	HIST1H4B
	DEDD2	GCH1	C20orf117	GLB1L3	DEPDC1B	DAZAP1	CPNE2	CD3D	DOLPP1	NFIL3	HIST1H4D
	DEF8	GCKR	C20orf118	GLDC	DES	DBF4B	CPNE5	CD40LG	DOPEY2	NGF	HIST1H4I
	DEFB1	GCNT3	C20orf12	GLDN	DFNB31	DBH	CPNE7	CD40	DOT1L	NID1	HIST1H4J
	DEGS1	GCNT4	C20orf132	GLI2	DGAT1	DBN1	CPNE9	CD44	DPCR1	NKD2	HIST2H2AB
	DEGS2	GCNT7	C20orf134	GLIPR1L1	DGAT2	DBNDD1	CPO	CD46	DPF1	NLRP12	HIST2H2BE
	DENND1A	GDA	C20orf152	GLT1D1	DGCR6L	DBNL	CPSF1	CD4	DPP10	NLRP9	HIST2H2BF
	DENND4B	GDF5	C20orf160	GLT25D2	DGCR6	DCAF15	CPSF4	CD55	DPP3	NMB	HIST2H3C
	DEPDC1B	GFPT2	C20orf165	GLYCTK	DGKQ	DCAF4	CPT1A	CD58	DPP6	NME1-NME2	HIST2H3D
	DES	GGT8P	C20orf177	GMFG	DGKZ	DCAKD	CPT1B	CD59	DPP7	NME2P1	HIST2H4A
	DEXI	GGTLC1	C20orf195	GNA14	DGUOK	DCI	CPT1C	CD63	DQX1	NMNAT2	HIST4H4
	DFNB31	GIPC2	C20orf197	GNAO1	DHCR24	DCPS	CRABP2	CD68	DRD1	NMUR1	HK2
	DGAT1	GJA4	C20orf200	GNG11	DHCR7	DCST1	CRAT	CD69	DRD4	NOD2	HMCN1
	DGAT2	GJB3	C20orf202	GNG2	DHDH	DCST2	CRB3	CD70	DSC2	NOL3	HMGCLL1
	DGCR10	GJB4	C20orf203	GNGT2	DHODH	DCTN1	CREB3L1	CD74	DSCAML1	NOS2	HMGCL
	DGCR14	GJB6	C20orf26	GNLY	DHPS	DCTN3	CREB3	CD79A	DSCAM	NOSTRIN	HMMR
	DGCR2	GJD3	C20orf46	GOLGA9P	DHRS13	DCTPP1	CRELD1	CD7	DSCR6	NOTCH3	HOOK2
	DGCR6L	GK3P	C20orf94	GP6	DHRS4L1	DCXR	CRELD2	CD81	DSG2	NOTCH4	HOPX
	DGCR6	GK	C21orf121	GPA33	DHRS4L2	DDAH2	CRIP1	CD82	DSG3	NOTUM	HOXA2
	DGKQ	GLB1L3	C21orf122	GPBAR1	DHRS4	DDC	CRIP2	CD8A	DSP	NOVA2	HOXA3
	DHCR24	GLDN	C21orf128	GPC3	DHRS7	DDIT4	CRKL	CD8B	DTHD1	NOX4	HOXA4
	DHCR7	GLIS3	C21orf129	GPC6	DIABLO	DDN	CRLF1	CD93	DTL	NPAS2	HOXA5
	DHDH	GLRX	C21orf130	GPD1L	DIO3OS	DDOST	CRTC2	CD97	DTNA	NPC1L1	HOXA6
	DHPS	GLT1D1	C21orf15	GPIHBP1	DIO3	DDRGK1	CRYBB1	CD99	DTNB	NPDC1	HOXC12
	DHRS13	GLT25D2	C21orf29	GPM6A	DKK3	DDTL	CRYBB3	CD9	DTX2	NPFF	HOXD10
	DHRS1	GLUD2	C21orf2	GPR110	DKKL1	DDT	CRYGS	CDC123	DTX4	NPHS1	HOXD9
	DHRS3	GMCL1L	C21orf34	GPR115	DLG4	DDX11L2	CSE1L	CDC20	DUOX1	NPIPL3	HPGDS
	DHRS4	GMFG	C21orf49	GPR116	DLGAP3	DDX11	CSF3R	CDC25A	DUOX2	NPM2	HPGD
	DHRS7B	GNA14	C21orf62	GPR120	DLL3	DDX12	CSK	CDC26	DUOXA1	NPR2	HPR
	DHRS7	GNA15	C21orf67	GPR124	DLL4	DDX39	CSMD3	CDC37	DUOXA2	NPTX1	HPSE2
	DHRSX	GNAI1	C21orf71	GPR132	DLST	DDX41	CSNK1D	CDC40	DUSP10	NPTX2	HP
	DHX30	GNG10	C21orf7	GPR133	DLX1	DDX49	CSNK1E	CDC42EP5	DUSP16	NPTXR	HRH2
	DHX34	GNG4	C21orf81	GPR146	DLX2	DDX51	CSNK2B	CDC42	DUSP26	NR2F2	HRH4
	DHX38	GOLGA9P	C21orf82	GPR153	DMBT1	DDX54	CSPG4	CDC45	DUSP2	NRCAM	HRNBP3
	DHX58	GOLT1A	C21orf88	GPR162	DNAH9	DDX56	CSPG5	CDC5L	DUSP4	NRG3	HSD11B1
	DIABLO	GP1BA	C21orf90	GPR171	DNAJB1	DEAF1	CSRP2	CDCA7	DUSP8	NRGN	HSD17B13
	DIO3	GPAT2	C21orf91	GPR174	DNAJC17	DECR2	CST3	CDH11	DUSP9	NRK	HSD17B1
	DIRAS1	GPC3	C21orf96	GPR17	DNAJC19	DEF6	CST6	CDH13	DVL1	NRP1	HSD17B6
	DKKL1	GPC5	C22orf15	GPR183	DNAJC22	DEF8	CSTB	CDH15	DYDC2	NTAN1	HSD17B7P2
	DLEC1	GPCPD1	C22orf23	GPR20	DNAJC4	DENND2A	CSTF1	CDH17	DYNLRB2	NTF3	HSD17B7
	DLG4	GPM6A	C22orf25	GPR21	DNAJC5	DENND4B	CSTF2	CDH26	E2F1	NTM	HSDL1
	DLX4	GPR109A	C22orf26	GPR44	DNAL4	DEPDC1B	CTAGE4	CDH3	E2F2	NTSR1	HSF2BP
	DLX5	GPR109B	C22orf29	GPR4	DNASE1L2	DEPDC1	CTBP1	CDH5	E2F5	NUP210L	HSF4
	DLX6AS	GPR110	C22orf30	GPR65	DNASE1L3	DEPDC4	CTF1	CDH8	E2F7	NUPR1	HSN2
	DMBX1	GPR116	C22orf34	GPR68	DNASE2B	DES	CTNNA1	CDHR1	E2F8	NXF3	HSP90AB4P
	DMGDH	GPR146	C22orf41	GPR77	DNASE2	DEXI	CTSA	CDHR4	EBP	NXPH3	HSPA6
	DNAJA1	GPR162	C22orf43	GPR84	DNLZ	DFNB31	CTSD	CDIPT	ECE2	NXPH4	HSPA7
	DNAJA3	GPR171	C22orf45	GPR88	DNMT3B	DGAT1	CTSE	CDK11A	ECH1	OCM	HSPB6
	DNAJB11	GPR17	C2CD4A	GPR97	DNPEP	DGCR14	CTSL1	CDK2AP1	ECHDC3	ODF3L1	HSPB7
	DNAJB13	GPR182	C2CD4B	GPRC5A	DNTTIP1	DGCR2	CTSL2	CDK2AP2	ECT2L	ODF3	HTR2A
	DNAJB1	GPR183	C2CD4C	GPRC5C	DOC2A	DGCR5	CTSZ	CDK4	ECT2	OLAH	HTR2B
	DNAJB2	GPR21	C2CD4D	GPRC5D	DOK4	DGCR6L	CTTN	CDK8	EDARADD	OLIG2	HTRA3
	DNAJB6	GPR35	C2orf16	GPRIN3	DONSON	DGCR6	CTU1	CDKL1	EDAR	OPCML	HULC
	DNAJC11	GPR37L1	C2orf27A	GPSM1	DPAGT1	DGKD	CTXN1	CDKN1A	EDN2	OR13A1	HYAL1
	DNAJC14	GPR3	C2orf39	GPSM3	DPCD	DGKQ	CUEDC2	CDKN1B	EEF1A2	OR2B6	ICAM1
	DNAJC17	GPR4	C2orf42	GPX2	DPF1	DGUOK	CUTA	CDKN1C	EFCAB10	OR2W3	ICAM5
	DNAJC19	GPR64	C2orf44	GPX3	DPH1	DHCR7	CUZD1	CDKN2C	EFCAB1	OR51E1	ICOSLG
	DNAJC1	GPR84	C2orf48	GRAPL	DPH2	DHDH	CXADRP3	CDKN3	EFCAB4A	OR7A5	IFNGR2
	DNAJC25	GPR85	C2orf50	GRAP	DPM2	DHPS	CXCL17	CDNF	EFCAB5	OR7C1	IGF1
	DNAJC4	GPR87	C2orf52	GRASP	DPM3	DHRS13	CXCR3	CDO1	EFHB	OSBPL6	IGF2AS
	DNAJC5	GPR97	C2orf58	GRIA1	DPP7	DHRS4L1	CXXC1	CDR2	EFHC2	OSCAR	IGF2
	DNAJC7	GPRIN2	C2orf60	GRIA3	DPY30	DHRS4L2	CXXC5	CDRT15P	EFHD1	OSM	IGFBPL1
	DNAJC8	GPSM3	C2orf61	GRID1	DRD2	DHRS4	CXorf40A	CDRT1	EFNA1	OVGP1	IGFL2
	DNAL4	GPX2	C2orf63	GRIK1	DRG2	DHX34	CXorf40B	CDYL2	EFNA3	OVOL1	IGFN1
	DNASE1L2	GPX3	C2orf66	GRIK4	DSCR6	DHX38	CXorf50B	CEACAM19	EFNA4	P2RX7	IGJ
	DNASE2	GRAMD1A	C2orf67	GRIN2B	DSN1	DIRAS1	CYB561D1	CEACAM21	EFNA5	P2RY14	IGSF10
	DND1	GRAMD1B	C2orf70	GRK5	DTYMK	DIRAS2	CYB561D2	CEACAM3	EFR3B	P2RY1	IGSF22
	DNER	GRAPL	C2orf71	GRRP1	DULLARD	DKKL1	CYB561	CEACAM4	EGFL6	P4HA1	IGSF9B
	DNLZ	GRAP	C2orf72	GSTM2P1	DUS1L	DLG4	CYB5R1	CEACAM6	EGF	P4HA2	IL17RB
	DNPEP	GRASP	C2orf73	GSTM5	DUS3L	DLG5	CYB5R3	CECR5	EGLN3	PADI4	IL17REL
	DNTTIP1	GRB10	C2orf77	GSTT2	DUSP12	DLGAP5	CYC1	CECR6	EGOT	PALM	IL18R1
	DOC2A	GREM1	C2orf81	GTF2A1L	DUSP23	DLK1	CYFIP2	CENPM	EHD1	PAM	IL1R1
	DOK4	GRIA2	C2orf82	GUCY1A2	DUSP26	DLK2	CYGB	CENPT	EHF	PANK3	IL1R2
	DOLK	GRIA4	C2orf84	GVIN1	DUSP2	DLL3	CYHR1	CENPV	EIF3IP1	PAQR5	IL1RL1
	DOLPP1	GRIK1	C2orf85	GYPC	DUSP5P	DLST	CYP26B1	CEP170L	EIF5AL1	PCBP3	IL1RL2
	DOM3Z	GRIK4	C2orf86	GYPE	DUT	DLX1	CYP2B7P1	CEP76	ELANE	PCDH10	IL20RA
	DPAGT1	GRIN2A	C2orf89	GZMA	DVL1	DLX4	CYP2C8	CEPT1	ELAVL2	PCDH12	IL24
	DPCD	GRIN3B	C3AR1	GZMB	DVL2	DLX5	CYP2D7P1	CES1	ELAVL3	PCDH15	IL2RA
	DPF2	GRK5	C3orf15	GZMH	DYNC1I2	DLX6AS	CYP2S1	CES3	ELF3	PCDH17	IL32
	DPH1	GRM7	C3orf18	GZMK	DYNLL1	DLX6	CYP3A43	CETN2	ELF5	PCDH20	IL33
	DPH2	GRRP1	C3orf20	GZMM	DYRK4	DMAP1	CYP4F12	CETN3	ELFN2	PCDHA10	IL6
	DPM1	GSDMB	C3orf32	HAAO	DYSF	DMBT1	CYTH2	CETP	ELMO3	PCDHA5	IL8
	DPM2	GSTA1	C3orf34	HAMP	E2F1	DMBX1	DAD1	CFB	ELOVL3	PCDHA6	ILVBL
	DPM3	GSTO1	C3orf35	HAPLN2	E2F2	DMPK	DALRD3	CFD	EME1	PCDHA7	IMPA2
	DPP3	GTF2A1L	C3orf36	HAPLN4	E2F4	DMRTA1	DAND5	CFHR3	EMID1	PCDHA8	IMPG1
	DPP7	GTF2H2B	C3orf38	HAR1A	E4F1	DMWD	DAPK3	CFH	EMID2	PCGF2	INE1
	DPP9	GTPBP1	C3orf42	HAR1B	EBPL	DNAH2	DAXX	CFI	EML5	PCK1	INHA
	DPY19L2P4	GUCY2C	C3orf45	HAS1	EBP	DNAI1	DAZAP1	CFL1	EMP2	PCOTH	INHBB
	DPY30	GYS1	C3orf47	HAS2AS	ECE1	DNAJA3	DBN1	CFL2	EMR1	PDE1A	INMT
	DRAP1	GYS2	C3orf48	HAS2	ECE2	DNAJB13	DBNDD1	CFTR	EMR2	PDE3A	INPP5B
	DRG2	GZMB	C3orf52	HAVCR2	ECH1	DNAJB1	DBNDD2	CGB7	EMR3	PDE4C	INSC
	DSCR6	H3F3C	C3orf55	HBA1	ECHDC3	DNAJB2	DBP	CH25H	EMR4P	PDE6G	INSL3
	DTX3	HABP2	C3orf57	HBA2	ECHS1	DNAJC22	DCAF11	CHAC2	EN2	PDE8B	INTS3
	DTYMK	HAL	C3orf59	HBB	ECSCR	DNAJC4	DCAF12	CHAF1B	ENDOG	PDGFB	INTU
	DULLARD	HAPLN2	C3orf62	HBD	ECSIT	DNAJC9	DCAF15	CHCHD1	ENGASE	PDGFRB	IPP
	DUS1L	HAPLN3	C3orf63	HBEGF	EDN2	DNAL4	DCAF7	CHCHD2	ENHO	PDLIM2	IPW
	DUS2L	HAS1	C3orf67	HCG26	EDNRB	DNASE1L2	DCI	CHCHD4	ENKUR	PDZD4	IQCH
	DUSP14	HAS2AS	C3orf70	HCK	EEF1A2	DND1	DCLK3	CHCHD6	ENO1	PDZD7	IQGAP3
	DUSP2	HAS2	C3orf71	HCLS1	EEF1B2	DNLZ	DCTN1	CHCHD8	ENPP3	PEAR1	IRX4
	DUSP4	HAS3	C3orf72	HCP5	EEF1D	DNM1P35	DCTN2	CHD1L	ENTPD2	PECAM1	ISL2
	DUSP7	HAVCR1	C3orf74	HCST	EEF1G	DNM1	DCTN3	CHD5	ENTPD3	PFKFB3	ISM2
	DUSP8	HBD	C3	HDC	EEFSEC	DNPEP	DCTPP1	CHEK2	ENTPD6	PFKFB4	ITGA8
	DUT	HBEGF	C4BPA	HEG1	EFCAB1	DOCK6	DCUN1D2	CHGA	ENTPD8	PFKP	ITGB1BP2
	DVL1	HCG22	C4BPB	HEMGN	EFCAB3	DOHH	DCXR	CHI3L2	EPAS1	PGBD5	ITGBL1
	DVL2	HCK	C4orf10	HEPACAM2	EFCAB4A	DOK1	DDAH2	CHKB-CPT1B	EPB41L4B	PGF	ITIH1
	DVL3	HCLS1	C4orf12	HES4	EFEMP1	DOK4	DDIT3	CHKB	EPB41L5	PGK1	ITIH3
	DYNC1I1	HCN4	C4orf19	HES5	EFHD1	DOK7	DDN	CHMP1A	EPB41	PGM5	ITPKA
	DYNLL1	HEMGN	C4orf21	HEYL	EFNA1	DOLPP1	DDR1	CHMP1B	EPB49	PGPEP1	IZUMO1
	DYNLL2	HEPACAM2	C4orf23	HGF	EFNA3	DOM3Z	DDRGK1	CHMP2A	EPCAM	PHACTR1	JHDM1D
	DYNLRB1	HERC2P4	C4orf26	HHEX	EFNA4	DONSON	DDT	CHMP2B	EPHA10	PHF1	JMJD7-PLA2G4B
	DYNLT1	HEY1	C4orf31	HHIPL1	EFNB1	DOT1L	DDX11	CHMP4A	EPHA1	PHF21B	JPH3
	DYRK4	HFM1	C4orf36	HHIP	EGFL6	DPAGT1	DDX12	CHMP4B	EPHA7	PHLPP1	JSRP1
	E2F1	HHIP	C4orf37	HIC1	EGFL7	DPF1	DDX23	CHMP4C	EPN3	PI3	KANK4
	E2F4	HIF1A	C4orf38	HIF3A	EGFL8	DPF2	DDX27	CHMP5	EPOR	PI4KAP2	KATNAL2
	E2F5	HIF3A	C4orf39	HIGD1B	EGLN2	DPH1	DDX39	CHN1	EPO	PIWIL2	KBTBD12
	E4F1	HIST1H1D	C4orf42	HIST1H1E	EGLN3	DPH2	DDX41	CHPF	EPPK1	PJA2	KCNA7
	EAPP	HIST1H1E	C4orf44	HIST1H1T	EHD2	DPM2	DDX54	CHP	EPR1	PKNOX2	KCND1
	EBAG9	HIST1H2AC	C4orf47	HIST1H2AD	EHMT2	DPM3	DDX56	CHRDL1	EPS8L1	PKP1	KCND2
	EBF4	HIST1H2AE	C4orf49	HIST1H2BM	EI24	DPP3	DDX5	CHRNA1	EPS8L2	PLA1A	KCNE2
	EBNA1BP2	HIST1H2AH	C4orf6	HIST1H4B	EID2B	DPP7	DEAF1	CHRNA7	ERAS	PLAC1	KCNG1
	EBP	HIST1H2BG	C5orf20	HIST2H2AB	EID2	DPT	DECR2	CHRNB4	ERBB2	PLAG1	KCNIP2
	ECE1	HIST1H2BH	C5orf23	HK3	EIF1AD	DPY19L2P2	DEDD2	CHST1	ERBB3	PLAUR	KCNJ12
	ECE2	HIST1H2BM	C5orf25	HKDC1	EIF1B	DPYSL4	DEF6	CHST2	ERBB4	PLCE1	KCNJ13
	ECEL1	HIST1H3B	C5orf36	HLA-B	EIF1	DPYSL5	DEGS2	CHST4	ERC2	PLCXD3	KCNJ15
	ECH1	HIST1H3D	C5orf40	HLA-DMA	EIF2B3	DQX1	DENND4B	CHST7	ERCC6L	PLD5	KCNJ6
	ECHS1	HIST1H3J	C5orf41	HLA-DMB	EIF2S2	DRAP1	DEPDC1B	CHTF8	EREG	PLIN2	KCNJ8
	ECM1	HIST1H4C	C5orf42	HLA-DOA	EIF3F	DRD4	DERL3	CIAO1	ERMP1	PLOD2	KCNK1
	ECSIT	HIST1H4I	C5orf49	HLA-DPA1	EIF3I	DRG2	DES	CIAPIN1	ERN2	PLVAP	KCNQ1OT1
	EDC4	HIST2H2AA3	C5orf4	HLA-DPB1	EIF3K	DSCAML1	DEXI	CIB1	ERP27	PLXDC1	KCNRG
	EDF1	HIST2H2BA	C5orf53	HLA-DQA1	EIF3L	DTL	DFFB	CIB2	ERRFI1	PMP22	KCNS2
	EDN2	HIST2H2BE	C5orf54	HLA-DQA2	EIF3M	DTX3	DFNB31	CISD1	ESCO2	PNCK	KCNT2
	EED	HIST2H2BF	C5orf55	HLA-DQB1	EIF4A1	DTX4	DGAT1	CISD2	ESM1	PNMA2	KCTD14
	EEF1A1P9	HIST2H3D	C5orf56	HLA-DQB2	EIF4A3	DTYMK	DGCR14	CITED2	ESPL1	PNPLA1	KCTD16
	EEF1A2	HK2	C5orf58	HLA-DRA	EIF4EBP1	DULLARD	DGCR2	CIZ1	ESPNP	PNRC1	KCTD19
	EEF1B2	HK3	C5	HLA-DRB1	EIF4EBP3	DUS1L	DGCR6L	CKAP2L	ESPN	POU4F1	KDM3A
	EEF1D	HKDC1	C6orf122	HLA-DRB5	EIF5A	DUS2L	DGCR6	CKAP4	ESRP1	POU5F1B	KEL
	EEF1E1	HLA-J	C6orf123	HLA-DRB6	EIF6	DUS3L	DGKQ	CKLF	ESRP2	POU5F1	KGFLP2
	EEF1G	HLA-L	C6orf124	HLA-F	ELAC2	DUSP13	DGKZ	CKS1B	ESRRA	PPBP	KIAA0087
	EEF2	HLX	C6orf126	HLA-G	ELANE	DUSP15	DGUOK	CKS2	ESRRG	PPFIA4	KIAA0125
	EFCAB4A	HMGB2	C6orf127	HLA-J	ELK1	DUSP26	DHCR24	CLCA2	ESYT3	PPIAL4G	KIAA0182
	EFEMP2	HMGCLL1	C6orf132	HLA-L	ELL3	DUSP27	DHCR7	CLCN2	ETV2	PPM1E	KIAA0391
	EFNA3	HNF4G	C6orf138	HLX	ELMO3	DUSP5P	DHDH	CLCNKB	ETV3L	PPM1N	KIAA0513
	EFNB3	HOPX	C6orf142	HMCN1	ELN	DUSP9	DHPS	CLDN18	ETV4	PPP1R14A	KIAA0748
	EFS	HOXD10	C6orf147	HMGCS2	ELOF1	DUT	DHRS13	CLDN1	EVPLL	PPP1R14C	KIAA1199
	EGFL6	HOXD9	C6orf150	HMOX1	ELOVL1	DVL1	DHRS2	CLDN23	EVPL	PPP1R1A	KIAA1211
	EGFL7	HPCAL1	C6orf154	HOPX	ELP2	DVL2	DHRS4L2	CLDN3	EXD1	PPP1R3C	KIAA1324L
	EGFL8	HPDL	C6orf155	HOXA2	ELTD1	DVL3	DHRS4	CLDN4	EXO1	PPP2R2C	KIAA1407
	EGF	HPD	C6orf163	HOXA3	EMD	DYNC1I1	DHRS7	CLDN5	EXPH5	PRDM6	KIAA1609
	EGLN2	HPRT1	C6orf164	HOXA4	EME1	DYNLT1	DHX34	CLDN7	EZH2	PRELP	KIAA1908
	EI24	HPR	C6orf165	HOXA5	EMG1	DYSFIP1	DIRAS1	CLDN8	EZR	PRKAA2	KIF26B
	EIF1AD	HPSE2	C6orf168	HOXA6	EMILIN3	E2F1	DKK3	CLEC14A	F11R	PROK1	KISS1R
	EIF1B	HPSE	C6orf170	HOXA7	EML2	E2F2	DLG3	CLEC18A	F12	PROK2	KIT
	EIF1	HP	C6orf174	HOXB13	EML3	E2F4	DLG5	CLEC18B	F2RL1	PROX1	KLF15
	EIF2B2	HRASLS5	C6orf176	HOXB2	EMP3	E2F8	DLGAP5	CLEC1A	F2RL3	PROZ	KLF17
	EIF2B3	HRH1	C6orf186	HOXB3	EN1	E4F1	DLL1	CLEC3B	F5	PRR16	KLF1
	EIF2B5	HRH2	C6orf195	HOXB4	ENDOG	EBF4	DLL3	CLEC4A	F8A1	PRSS16	KLHDC1
	EIF3E	HRH3	C6orf201	HOXB5	ENG	EBP	DLL4	CLIC1	F8	PRX	KLHDC4
	EIF3F	HRH4	C6orf204	HOXB6	ENHO	ECE2	DLX1	CLIC2	FA2H	PSAT1	KLHL14
	EIF3G	HRNBP3	C6orf208	HOXB8	ENO1	ECH1	DLX3	CLIC3	FAAH2	PSENEN	KLHL35
	EIF3H	HS6ST3	C6orf217	HOXB9	ENO2	ECHS1	DLX4	CLIC4	FAAH	PSORS1C1	KLHL36
	EIF3I	HSD11B1	C6orf218	HOXD1	ENOPH1	ECSIT	DLX5	CLIC5	FADS1	PSORS1C2	KLHL3
	EIF3K	HSD17B13	C6orf223	HOXD3	ENPP2	EDC4	DLX6	CLIC6	FADS2	PTGER1	KLK11
	EIF4A1	HSD3B2	C6orf225	HOXD4	ENTPD2	EDIL3	DMBT1	CLINT1	FAM100B	PTGES	KLK14
	EIF4A2	HSN2	C6orf25	HPCAL4	ENY2	EDN2	DMBX1	CLIP4	FAM105A	PTGIR	KLK4
	EIF4A3	HSP90AB2P	C6orf27	HPD	EPAS1	EEF1A2	DMP1	CLK2P	FAM107B	PTGS1	KLRB1
	EIF4EBP1	HSP90B3P	C6orf59	HPGD	EPB42	EEF1D	DMPK	CLN3	FAM108A1	PTGS2	KPNA7
	EIF4EBP3	HSPA1A	C6orf81	HPR	EPB49	EEF2	DMRTC1B	CLN5	FAM108C1	PTH1R	KRBA2
	EIF4E	HSPA1B	C6orf97	HPSE2	EPCAM	EFCAB10	DNA2	CLNS1A	FAM110A	PTPRE	KREMEN2
	EIF5AL1	HSPA4L	C6	HP	EPHB4	EFCAB3	DNAH10	CLPB	FAM110C	PTPRN	KRT13
	EIF5A	HSPA5	C7orf31	HRC	EPHX1	EFEMP2	DNAI1	CLPP	FAM111B	PTTG2	KRT17
	EIF6	HSPA6	C7orf34	HS3ST2	EPN1	EFHD2	DNAJA1	CLPTM1L	FAM127B	PTX4	KRT1
	ELAC2	HSPB6	C7orf41	HS3ST3A1	EPN3	EFNA1	DNAJA3	CLPTM1	FAM129B	PVR	KRT23
	ELF3	HSPB7	C7orf46	HS3ST5	EPOR	EFNA3	DNAJA4	CLPX	FAM132A	PWWP2A	KRT5
	ELK1	HSPB8	C7orf51	HSD11B1	EPS8L2	EFNA4	DNAJB11	CLSPN	FAM154B	PXDN	KRT79
	ELMO3	HTR2A	C7orf52	HSD11B2	EPX	EFNB1	DNAJB1	CLTA	FAM155B	PXMP4	KRT7
	ELMOD1	HTR3A	C7orf53	HSD17B3	ERAL1	EFNB3	DNAJB2	CLTB	FAM157B	PYGB	KRT81
	ELN	HTR6	C7orf54	HSD17B6	ERAS	EFS	DNAJB5	CLTC	FAM158A	PZP	KRT86
	ELOF1	HUS1B	C7orf57	HSH2D	ERCC1	EGF	DNAJB6	CLUL1	FAM160A1	RAB13	KRTAP5-1
	ELOVL1	HYAL1	C7orf58	HSPA12B	ERF	EGLN2	DNAJC12	CLU	FAM164C	RAB24	KSR1
	ELOVL4	ICAM1	C7orf60	HSPA1A	ERGIC3	EGLN3	DNAJC17	CLYBL	FAM166A	RAB3D	KSR2
	EMD	ICAM2	C7orf61	HSPA1B	ERH	EHD3	DNAJC5B	CMAS	FAM166B	RAB3IP	KY
	EME1	ICAM4	C7orf63	HSPA6	ERI3	EHMT2	DNAJC5	CMBL	FAM167A	RAB41	L1CAM
	EMG1	ICAM5	C7orf64	HSPA7	ERN2	EIF2B2	DNAJC7	CMC1	FAM171A2	RAB6B	L3MBTL
	EMILIN3	ID1	C7orf68	HSPB1	ESAM	EIF2B5	DNAL4	CMPK1	FAM173A	RABGAP1L	LAD1
	EML2	IDO1	C7orf69	HSPB6	ESD	EIF3B	DNASE1L2	CMTM2	FAM174B	RAD51L1	LAMA2
	EMP3	IER3	C7	HSPB7	ESPL1	EIF3F	DNASE1	CMTM8	FAM178B	RAET1L	LAMB2L
	ENDOG	IER5	C8G	HSPB8	ESRRA	EIF3G	DNASE2	CNBP	FAM179A	RAI14	LASS3
	ENG	IFITM2	C8ORFK29	HSPG2	ETFB	EIF3I	DNLZ	CNDP2	FAM183A	RALGPS2	LAT
	ENO1	IFNGR2	C8orf31	HTR1B	ETHE1	EIF3K	DNPEP	CNFN	FAM183B	RAMP3	LAX1
	ENO2	IFRD1	C8orf34	HTR1F	ETS2	EIF3L	DOC2A	CNGA3	FAM184A	RAPGEF5	LBX2
	ENO3	IGDCC3	C8orf37	HTR2B	ETV4	EIF4A3	DOCK6	CNIH4	FAM184B	RASIP1	LCN2
	ENOPH1	IGF1	C8orf39	HTR3A	EVI5L	EIF4EBP1	DOHH	CNIH	FAM189A1	RASL12	LDHD
	ENPP2	IGF2BP1	C8orf41	HTR7	EVPLL	EIF4EBP3	DOK1	CNN1	FAM189A2	RBP7	LEAP2
	ENTPD2	IGF2BP2	C8orf42	HTRA4	EVPL	EIF5AL1	DOK4	CNN3	FAM189B	RCAN2	LEMD1
	ENTPD6	IGF2BP3	C8orf44	HUNK	EXD1	EIF5A	DOK7	CNOT1	FAM195A	REM1	LENEP
	ENY2	IGFBP1	C8orf45	HUS1B	EXOSC4	EIF6	DOLK	CNOT8	FAM22F	RFPL1	LEPREL2
	EPB41L4B	IGFBP3	C8orf46	HVCN1	EXOSC5	ELANE	DOLPP1	CNO	FAM27A	RGL3	LEPR
	EPB49	IGFBP4	C8orf47	HYAL1	EXOSC7	ELMO3	DPAGT1	CNTD2	FAM27C	RGS1	LEP
	EPHA1	IGJ	C8orf48	HYAL2	EYA2	ELMOD1	DPCD	CNTN4	FAM3B	RGS20	LETMD1
	EPHA6	IGLON5	C8orf51	ICAM1	F10	ELN	DPEP1	CNTNAP1	FAM3D	RGS4	LFNG
	EPHA8	IGSF10	C8orf58	ICAM2	F11R	ELOF1	DPM1	COASY	FAM47E	RGS5	LGALS12
	EPHB2	IGSF1	C8orf77	ICAM4	F12	ELOVL1	DPM2	COL11A2	FAM49A	RGS7BP	LGALS4
	EPHB3	IGSF6	C8orf79	ICAM5	F2RL3	EME1	DPM3	COL13A1	FAM49B	RGS9BP	LGI2
	EPHB4	IL10	C8orf80	ICOS	F8A1	EME2	DPP3	COL14A1	FAM54A	RHCG	LGR5
	EPHX1	IL11	C8orf83	ID1	FA2H	EMID1	DPP7	COL15A1	FAM57B	RHPN2	LGR6
	EPHX2	IL13RA2	C8orf84	ID3	FAAH	EMID2	DPP9	COL18A1	FAM58A	RICH2	LHFPL5
	EPN1	IL15RA	C8orf85	IER2	FABP5	EMILIN1	DPY19L2P1	COL1A2	FAM59A	RIMKLA	LHX2
	EPOR	IL17RA	C9orf102	IER3	FADS2	EMILIN3	DPY30	COL21A1	FAM5C	RIMS2	LILRB5
	EPR1	IL18R1	C9orf109	IER5L	FADS6	EML3	DPYSL5	COL23A1	FAM60A	RIOK3	LIMS3
	ERAL1	IL18RAP	C9orf110	IER5	FAM100A	EMP3	DQX1	COL28A1	FAM64A	RNASE10	LIPG
	ERAS	IL1A	C9orf116	IFFO1	FAM100B	EMX1	DRAM1	COL3A1	FAM69B	RNASE1	LMAN1L
	ERBB2	IL1B	C9orf117	IFI27L2	FAM107A	EMX2OS	DRAP1	COL4A1	FAM71E1	RNASE2	LMO1
	ERCC1	IL1R1	C9orf122	IFI30	FAM108A1	EMX2	DRD1	COL4A2	FAM72A	RNF112	LMOD1
	ERF	IL1R2	C9orf128	IFIT1B	FAM108B1	EN1	DRG1	COL4A3	FAM72B	RNF113B	LNP1
	ERGIC3	IL1RAP	C9orf129	IFITM2	FAM108C1	ENDOG	DSCR6	COL5A3	FAM83A	RNF128	LOC100127888
	ERH	IL1RL1	C9orf130	IGDCC3	FAM109A	ENGASE	DTX3	COL7A1	FAM83B	RNF152	LOC100128239
	ERI3	IL1RN	C9orf131	IGDCC4	FAM109B	ENHO	DTYMK	COL8A1	FAM83D	RNF182	LOC100128288
	ERP29	IL23A	C9orf139	IGF1	FAM110A	ENO1	DUS1L	COLEC11	FAM83E	RNF183	LOC100128573
	ESAM	IL24	C9orf144B	IGF2AS	FAM119B	ENO2	DUS2L	COLEC12	FAM83F	RNF2	LOC100128640
	ESD	IL27	C9orf152	IGF2	FAM125A	ENO3	DUSP12	COMMD10	FAM83G	RNF5	LOC100128675
	ESPNL	IL2RA	C9orf153	IGFBP4	FAM127A	ENPP6	DUSP13	COMMD1	FAM83H	ROBO4	LOC100129637
	ESPNP	IL2RG	C9orf163	IGFBP6	FAM127B	ENTPD2	DUSP15	COMMD3	FAM84A	ROPN1B	LOC100129716
	ESRRA	IL33	C9orf170	IGFN1	FAM127C	ENTPD6	DUSP26	COMMD4	FAM92B	ROS1	LOC100129726
	ESYT1	IL3RA	C9orf172	IGJ	FAM128A	ENY2	DUSP5	COMMD6	FAM95B1	RPL14	LOC100130015
	ETFA	IL4R	C9orf173	IGSF10	FAM128B	EPDR1	DUSP7	COMMD7	FANCA	RPL18A	LOC100130148
	ETFB	IL6R	C9orf24	IGSF6	FAM129B	EPHA2	DVL1	COMMD8	FANCD2	RPL23AP32	LOC100130872
	ETHE1	IL6	C9orf25	IGSF9B	FAM131C	EPHA3	DYDC2	COMTD1	FANCE	RPL23A	LOC100130933
	ETNK2	IL7R	C9orf30	IKBIP	FAM132A	EPHA7	DYNC1I2	COPA	FANCI	RPL23	LOC100131434
	EVI5L	IL7	C9orf3	IKZF1	FAM158A	EPHA8	DYNLL1	COPB1	FANK1	RPL28	LOC100131496
	EVPLL	IL8	C9orf41	IKZF3	FAM160A2	EPHB3	DYNLL2	COPB2	FARP1	RPL31	LOC100131551
	EXOC3L	IMPA2	C9orf43	IL10	FAM162A	EPHB4	DYNLRB1	COPE	FASN	RPL37	LOC100131726
	EXOSC1	INA	C9orf44	IL12A	FAM162B	EPHB6	DYNLRB2	COPG	FAT3	RPL38	LOC100132287
	EXOSC2	INHBB	C9orf45	IL12RB1	FAM164C	EPN1	DYNLT1	COPS3	FBN3	RPLP0P2	LOC100132354
	EXOSC4	INHBE	C9orf47	IL15RA	FAM167B	EPO	DYRK1B	COPS4	FBP1	RPPH1	LOC100132832
	EXOSC5	INMT	C9orf50	IL16	FAM171A2	EPR1	DYSFIP1	COPS6	FBRSL1	RPRM	LOC100133161
	EXOSC7	INSIG1	C9orf66	IL18R1	FAM173A	ERAL1	E2F1	COPS7A	FBXL15	RPS15A	LOC100133331
	EXOSC8	INSL3	C9orf68	IL18RAP	FAM173B	ERBB2	E2F2	COPS8	FBXL16	RPS16	LOC100133545
	EXTL3	IP6K3	C9orf72	IL1A	FAM176A	ERCC1	E2F5	COPZ1	FBXL20	RPS6KL1	LOC100133612
	EZH1	IQCH	C9orf84	IL1B	FAM176B	ERCC2	E4F1	COPZ2	FBXL8	RPS6	LOC100133957
	F12	IQSEC3	C9orf85	IL1R1	FAM181B	ERCC3	EBF4	COQ10A	FBXO15	RRAGD	LOC100134259
	F2RL1	IQUB	C9orf93	IL1R2	FAM183A	ERF	EBNA1BP2	COQ10B	FBXO16	RRAS	LOC100134368
	F8A1	IRAK2	C9orf96	IL1RL1	FAM189A2	ERGIC3	EBP	CORO1B	FBXO27	RS1	LOC100144604
	FA2H	IRAK3	C9orf98	IL1RN	FAM189B	ERH	ECH1	CORO7	FBXO2	RSPH9	LOC100188947
	FAAH	IRF2	C9orf9	IL24	FAM192A	ERI3	ECHDC3	CORT	FBXO43	RTDR1	LOC100190986
	FABP5	ISL2	C9	IL27	FAM193B	ESM1	ECHS1	COX10	FBXW10	RTN2	LOC100216545
	FADS1	ISOC1	CA11	IL2RA	FAM195A	ESPL1	ECM1	COX11	FBXW5	RUNDC3A	LOC100268168
	FADS2	ITGA2B	CA12	IL2RB	FAM195B	ESPNP	ECSIT	COX17	FBXW9	RUSC2	LOC100270710
	FAF1	ITGA2	CA13	IL2RG	FAM24B	ESPN	EDEM2	COX4I1	FCAR	RXFP1	LOC100270746
	FAF2	ITGA5	CA14	IL32	FAM27A	ESRRA	EDF1	COX4I2	FCER1G	RXRG	LOC100270804
	FAHD2A	ITGA7	CA1	IL33	FAM32A	ESYT3	EEF1A2	COX5A	FCGR3A	S100A10	LOC100271722
	FAHD2B	ITGAM	CA3	IL3RA	FAM36A	ETFB	EEF1D	COX5B	FCGR3B	S100A11	LOC100271836
	FAM100B	ITGAX	CA4	IL4R	FAM3A	ETHE1	EEFSEC	COX6A1	FCN3	S100A12	LOC100272216
	FAM102A	ITGB1BP2	CA5B	IL6	FAM3B	ETV2	EFCAB3	COX6B1	FDFT1	S100A3	LOC100272217
	FAM103A1	ITGB3	CA8	IL7R	FAM43B	EVI5L	EFHD1	COX6C	FDPSL2A	S100A4	LOC100272228
	FAM107A	ITGB6	CABLES1	IL8	FAM46B	EXD3	EFNA1	COX7A1	FDPS	S100A6	LOC100287227
	FAM110A	ITIH1	CABLES2	IMPG2	FAM50A	EXO1	EFNA3	COX7A2L	FEN1	S100A7	LOC134466
	FAM113A	ITIH2	CABP1	INMT	FAM53C	EXOC3L	EFNB1	COX7A2	FER1L5	S100A8	LOC143666
	FAM114A2	ITIH3	CABP4	INO80B	FAM54A	EXOC3	EGFL7	COX7B	FERMT1	S100A9	LOC144486
	FAM118B	ITPKC	CABP7	INPP5D	FAM54B	EXOSC4	EGFL8	COX7C	FFAR2	S100P	LOC144571
	FAM120AOS	ITPRIP	CACHD1	INSM1	FAM57B	EXOSC5	EGLN2	COX8A	FGA	S1PR3	LOC147727
	FAM125A	IVNS1ABP	CACNA1A	IP6K3	FAM58A	EXOSC7	EHMT2	CPA3	FGB	SAA1	LOC148696
	FAM127A	IZUMO1	CACNA1B	IPW	FAM5C	EYA1	EIF1	CPB2	FGFBP1	SAA2	LOC149134
	FAM127B	JAK3	CACNA1C	IQCA1	FAM64A	EYA2	EIF2AK1	CPD	FGFBP2	SAA4	LOC150197
	FAM127C	JMJD6	CACNA1D	IQSEC3	FAM69C	EZH2	EIF3D	CPE	FGFR2	SALL1	LOC157381
	FAM128B	JPH2	CACNA1E	IRAK3	FAM70B	F12	EIF3I	CPNE1	FGFR3	SAMD14	LOC158696
	FAM129B	JSRP1	CACNA1F	IRF1	FAM71E1	F3	EIF3K	CPNE2	FGFR4	SBSN	LOC162632
	FAM131A	KALRN	CACNA1G	IRF4	FAM72A	F8A1	EIF4A3	CPNE3	FGG	SCARF1	LOC219347
	FAM131C	KANK3	CACNA1H	IRF8	FAM73B	FAAH	EIF4EBP3	CPOX	FGL1	SCARNA16	LOC220930
	FAM134A	KBTBD11	CACNA1I	IRX2	FAM83A	FABP5	EIF5AL1	CPO	FGR	SCARNA5	LOC221442
	FAM134C	KBTBD12	CACNA2D1	ISLR2	FAM83D	FADS3	EIF5A	CPSF3	FIBCD1	SCEL	LOC253724
	FAM149A	KCNA5	CACNA2D2	ITGA1	FAM83E	FADS6	EIF6	CPT1C	FIGF	SCG3	LOC256880
	FAM154B	KCNE1L	CACNA2D3	ITGA5	FAM86A	FAHD2A	ELAVL2	CPT2	FITM1	SCGB2A1	LOC283050
	FAM158A	KCNE1	CACNA2D4	ITGA7	FAM86B2	FAH	ELAVL3	CPVL	FKBP4	SCGB2A2	LOC283314
	FAM160B2	KCNG1	CACNB1	ITGAD	FAM89A	FAM100A	ELFN1	CPXM1	FKBP6	SCN1A	LOC283392
	FAM162A	KCNG2	CACNB2	ITGAL	FAM89B	FAM100B	ELFN2	CPXM2	FKSG29	SCN4B	LOC283922
	FAM162B	KCNH1	CACNB4	ITGAM	FAM90A1	FAM101A	ELMO3	CPZ	FLAD1	SCN7A	LOC284276
	FAM165B	KCNH4	CACNG1	ITGAX	FAM92A1	FAM104B	ELMOD1	CP	FLJ13224	SCN9A	LOC284440
	FAM167B	KCNH7	CACNG4	ITGB3	FAM95B1	FAM108A1	ELOF1	CRABP1	FLJ14107	SCTR	LOC284578
	FAM171A2	KCNH8	CADM1	ITIH1	FAM96A	FAM109A	ELOVL1	CRABP2	FLJ16779	SDCBP2	LOC285593
	FAM174A	KCNIP1	CADM2	ITIH3	FAM96B	FAM110A	EMD	CRADD	FLJ23867	SDR16C5	LOC285696
	FAM174B	KCNJ10	CADM3	ITIH5	FAM98C	FAM113A	EME1	CRAT	FLJ40292	SEC61G	LOC286367
	FAM176B	KCNJ15	CADPS	ITK	FANCA	FAM116B	EMID1	CRB3	FLJ45445	SECTM1	LOC338799
	FAM180A	KCNJ16	CAGE1	ITM2A	FANCE	FAM118A	EML2	CREB3L4	FLJ46111	SEMA3F	LOC339047
	FAM181B	KCNJ2	CALB1	ITPKA	FANCG	FAM125A	ENDOG	CRELD1	FLJ90757	SEMA5A	LOC339524
	FAM189A1	KCNK3	CALCB	ITPRIP	FANCL	FAM127A	ENG	CRELD2	FLRT1	SEMA5B	LOC339674
	FAM189A2	KCNK7	CALCRL	IZUMO1	FARSA	FAM127B	ENHO	CREM	FLRT3	SEMA6D	LOC342346
	FAM189B	KCNK9	CALCR	JAG2	FASN	FAM128A	ENO2	CRHBP	FMN1	SEMA7A	LOC349196
	FAM18B	KCNMB1	CALHM1	JAK3	FASTKD3	FAM128B	ENO3	CRHR1	FMO2	2018-09-04	LOC374491
	FAM192A	KCNN4	CALHM2	JAKMIP1	FASTK	FAM131C	ENSA	CRIP1	FMO5	SERGEF	LOC375190
	FAM193B	KCNT1	CALML4	JAM2	FAU	FAM132A	ENTPD2	CRIP3	FMO6P	SERPINB2	LOC388242
	FAM195A	KCNT2	CALML6	JAM3	FBLIM1	FAM153A	ENTPD6	CRISP3	FNDC7	SERPINB5	LOC389791
	FAM195B	KCTD11	CALN1	JPH4	FBLN1	FAM153B	ENTPD8	CRISPLD2	FOLR1	SERPINB6	LOC391322
	FAM21A	KCTD14	CAMK1D	JUNB	FBLN5	FAM156A	ENY2	CRLF1	FOXA1	SERPINC1	LOC399744
	FAM24B	KCTD19	CAMK1G	JUN	FBLN7	FAM158A	EPB42	CRTAC1	FOXC2	SERPINE1	LOC400027
	FAM27A	KCTD4	CAMK1	KAL1	FBL	FAM160A1	EPCAM	CRTC2	FOXD4L1	SERPINI1	LOC400043
	FAM36A	KDM6B	CAMK2A	KANK3	FBRS	FAM160A2	EPHA1	CRYAB	FOXD4L6	SFTA1P	LOC400752
	FAM3A	KDR	CAMK2B	KBTBD11	FBXL15	FAM160B2	EPHB6	CRYBB1	FOXD4	SFTPA2	LOC400891
	FAM3D	KEL	CAMK2N1	KCNA3	FBXL16	FAM162A	EPHX3	CRYGN	FOXE3	SFTPB	LOC400927
	FAM43B	KIAA0125	CAMK2N2	KCNAB2	FBXL6	FAM163A	EPN1	CRYL1	FOXF1	SFTPD	LOC440173
	FAM49B	KIAA1045	CAMK4	KCNE3	FBXO17	FAM171A2	EPN3	CRYM	FOXH1	SGCA	LOC440563
	FAM50A	KIAA1199	CAMKK2	KCNE4	FBXO27	FAM173A	EPOR	CRYZL1	FOXJ1	SGIP1	LOC441204
	FAM53C	KIAA1751	CAMKV	KCNF1	FBXO2	FAM174A	EPO	CRYZ	FOXL1	SGPP2	LOC441208
	FAM54A	KIAA1949	CAMP	KCNG2	FBXO44	FAM176A	EPR1	CSDAP1	FOXM1	SGTB	LOC441455
	FAM54B	KIF17	CAMSAP1	KCNG3	FBXW9	FAM176B	EPS8L1	CSDA	FOXN4	SH2D3A	LOC441666
	FAM57A	KIF19	CAND1	KCNH4	FCGR3B	FAM178B	EPS8L2	CSDC2	FOXP4	SH2D3C	LOC442421
	FAM58A	KIF1A	CAND2	KCNIP1	FCN3	FAM189A1	EPX	CSDE1	FOXQ1	SH2D5	LOC55908
	FAM64A	KIF21B	CAPN11	KCNJ12	FCRLB	FAM189B	ERAL1	CSE1L	FPR1	SH2D6	LOC613037
	FAM65A	KIF25	CAPN13	KCNJ16	FDFT1	FAM193B	ERAS	CSF2RA	FPR2	SH3BGRL3	LOC641298
	FAM71E1	KIF4B	CAPN14	KCNJ2	FDPS	FAM195A	ERBB2	CSF3	FRAS1	SH3GL2	LOC643677
	FAM71F1	KIF6	CAPN5	KCNJ8	FDX1L	FAM195B	ERGIC1	CSMD1	FRAT2	SHANK3	LOC643763
	FAM73B	KIFC3	CAPN6	KCNK13	FDXR	FAM19A5	ERGIC3	CSNK2A2	FREM2	SHC2	LOC645676
	FAM82A2	KIRREL2	CAPN7	KCNK15	FERMT1	FAM22F	ERH	CSNK2B	FRK	SHISA9	LOC646471
	FAM83D	KISS1	CAPN8	KCNK17	FEZ1	FAM24B	ERP29	CSRNP3	FRMPD1	SIGLEC15	LOC646982
	FAM83E	KLF15	CAPN9	KCNK3	FFAR2	FAM36A	ESAM	CSRP1	FSTL4	SIX1	LOC650368
	FAM86B2	KLF1	CAPNS2	KCNN3	FGA	FAM38A	ESM1	CSRP2	FTHL3	SKINTL	LOC728264
	FAM89B	KLF2	CAPRIN2	KCNQ1	FGB	FAM3A	ESPL1	CST3	FURIN	SLAMF9	LOC728554
	FAM92A1	KLF5	CAPS2	KCNS2	FGF17	FAM50A	ESPNL	CST6	FUT1	SLC11A1	LOC728606
	FAM96B	KLF7	CARD10	KCNT2	FGF18	FAM50B	ESPNP	CST7	FUT2	SLC13A5	LOC728989
	FAM98C	KLF9	CARD11	KCNV2	FGFBP1	FAM53C	ESPN	CSTA	FUT3	SLC14A1	LOC80054
	FANCE	KLHL10	CARD16	KCTD12	FGFR4	FAM54A	ESR1	CSTB	FUT6	SLC15A1	LOC80154
	FARSA	KLHL2	CARD6	KCTD16	FGG	FAM54B	ESRP1	CSTF1	FUT9	SLC16A10	LOC84740
	FASN	KLHL6	CARD8	KDR	FGL1	FAM57A	ETFB	CSTF2	FXYD3	SLC16A12	LOC84856
	FASTK	KLK10	CARD9	KIAA0087	FHL1	FAM57B	ETHE1	CS	FZD5	SLC16A3	LOC90586
	FAU	KLK1	CARNS1	KIAA0125	FHL3	FAM64A	EVL	CTAGE4	FZD9	SLC1A1	LOC91450
	FBF1	KLK6	CASC1	KIAA0748	FHL5	FAM65A	EVPL	CTAGE6	G0S2	SLC22A17	LOC92973
	FBLIM1	KLK7	CASC2	KIAA1199	FHOD1	FAM65B	EXD2	CTBP1	G6PD	SLC23A3	LOC96610
	FBLL1	KLRF1	CASC5	KIAA1274	FH	FAM69B	EXD3	CTDSPL	GAB2	SLC24A4	LOXHD1
	FBLN1	KL	CASKIN1	KIAA1462	FIBCD1	FAM69C	EXOC2	CTGF	GABARAPL3	SLC24A5	LOX
	FBL	KNDC1	CASP10	KIAA1751	FIBP	FAM71E1	EXOC3L2	CTHRC1	GABBR2	SLC25A41	LPAR3
	FBRS	KRT13	CASP12	KIF17	FIGF	FAM72A	EXOC3L	CTNNA1	GABRD	SLC26A2	LPIN3
	FBXL16	KRT16	CASP4	KIF19	FKBP10	FAM72B	EXOC7	CTNNAL1	GABRP	SLC26A6	LPPR3
	FBXL2	KRT17	CASP5	KIF21B	FKBP1B	FAM72D	EXOSC1	CTNNB1	GAD1	SLC28A1	LRG1
	FBXL6	KRT1	CASP8AP2	KIF26A	FKBP3	FAM73B	EXOSC4	CTNNBL1	GADD45GIP1	SLC28A3	LRP1
	FBXO16	KRT6A	CASP8	KIF5C	FKBP4	FAM7A2	EXOSC5	CTSA	GAL3ST1	SLC2A14	LRRC10B
	FBXO17	KRT6B	CASP9	KIR2DL4	FKBP8	FAM82A2	EYA2	CTSC	GAL3ST2	SLC2A1	LRRC15
	FBXO18	KRT6C	CASQ1	KITLG	FKBPL	FAM83D	EZR	CTSD	GALE	SLC2A3	LRRC16B
	FBXO25	KRT81	CASQ2	KLF1	FLAD1	FAM84A	F10	CTSE	GALNT3	SLC2A5	LRRC29
	FBXO27	KRTAP5-1	CASS4	KLF2	FLJ26850	FAM89B	F12	CTSF	GALNT6	SLC34A2	LRRC36
	FBXO2	KSR1	CASZ1	KLHDC8A	FLJ34503	FAM95B1	F7	CTSH	GALNT7	SLC35F1	LRRC37A
	FBXO42	KYNU	CATSPER1	KLHDC9	FLJ35220	FAM96B	F8A1	CTSK	GALNTL4	SLC38A11	LRRC50
	FBXO44	LAMB4	CATSPER2P1	KLHL29	FLJ37201	FAM98C	FAAH2	CTSL1	GAL	SLC38A4	LRRC6
	FBXO6	LAMC2	CATSPER2	KLHL30	FLOT1	FANCA	FAAH	CTSL2	GAPDH	SLC38A5	LRRIQ3
	FBXW11	LAMP3	CATSPERG	KLHL4	FLOT2	FANCD2	FABP5	CTSO	GAS2L2	SLC44A3	LRRN4CL
	FBXW4	LANCL3	CBFA2T3	KLHL6	FLT1	FANCE	FADD	CTSS	GATA1	SLC4A4	LRRN4
	FBXW5	LAPTM5	CBLB	KLRB1	FLT4	FANCG	FADS2	CTTNBP2	GATA3	SLC4A9	LSM11
	FBXW9	LAT2	CBLL1	KLRC1	FLYWCH2	FANCI	FAHD1	CUEDC2	GATA5	SLC5A10	LTA
	FCAR	LBP	CBLN1	KLRC3	FMO3	FANCL	FAHD2B	CUL1	GBP2	SLC5A4	LTB4R2
	FCGR3B	LBR	CBLN3	KLRK1	FN3K	FARP1	FAIM2	CUL2	GBX2	SLC6A13	LTB4R
	FCHO1	LCN10	CBLN4	KL	FNTB	FARSA	FAM100A	CUL4B	GCAT	SLC6A14	LTBP4
	FCN2	LCN2	CBL	KNDC1	FOLR1	FASTK	FAM100B	CUTA	GCET2	SLC6A1	LTF
	FCN3	LCNL1	CBX2	KPNA7	FOLR3	FAT3	FAM102A	CUTC	GCHFR	SLC6A20	LTK
	FDFT1	LCP1	CBX5	KRT14	FOSL1	FAU	FAM108A1	CUX1	GCM1	SLC6A3	LUM
	FDPS	LCP2	CBX6	KRT16	FOXD1	FBF1	FAM108C1	CUX2	GCNT2	SLC6A7	LXN
	FDX1L	LDB2	CBX7	KRT17	FOXD2	FBLL1	FAM109A	CUZD1	GCNT3	SLC7A9	LY6D
	FDXR	LDB3	CC2D2A	KRT4	FOXE3	FBLN7	FAM10A4	CWC25	GCOM1	SLC8A3	LY6H
	FEM1A	LDHB	CC2D2B	KRT6B	FOXF1	FBL	FAM110A	CWH43	GCSH	SLC9A3R2	LYPLA1
	FEZ1	LDLR	CCBE1	KRT6C	FOXJ1	FBN3	FAM110B	CX3CL1	GDA	SLC9A5	LYVE1
	FFAR2	LEMD1	CCBL1	L1CAM	FOXRED1	FBRSL1	FAM110C	CXADRP3	GDF10	SLCO2A1	MACROD2
	FGD1	LEPREL1	CCBP2	L1TD1	FOXS1	FBRS	FAM113A	CXADR	GDF15	SLCO4A1	MAD2L2
	FGF13	LEPR	CCDC102A	LAIR1	FPGS	FBXL12	FAM116B	CXCL16	GDF5	SLED1	MADCAM1
	FGF17	LEP	CCDC102B	LAMA3	FPR1	FBXL15	FAM118A	CXCL17	GDPD1	SLITRK2	MAF
	FGF18	LGALS12	CCDC103	LAMA4	FPR2	FBXL19	FAM127A	CXCL1	GEMIN8P4	SLPI	MAL
	FGFRL1	LGI2	CCDC108	LAMB3	FRMD8	FBXL6	FAM127B	CXCL3	GGCT	SMAD2	MAMDC2
	FHL3	LGI3	CCDC110	LAMB4	FRS3	FBXL8	FAM128A	CXCL5	GGH	SMAD6	MAMDC4
	FIBCD1	LGSN	CCDC113	LAMC3	FSCN1	FBXO24	FAM128B	CXCL6	GGT1	SMARCA1	MAOA
	FIBP	LHFPL5	CCDC114	LAMP3	FSTL3	FBXO41	FAM129B	CXCR2	GGT3P	SMN1	MAP1LC3B2
	FIP1L1	LIF	CCDC116	LAPTM5	FTL	FBXO43	FAM131C	CXorf21	GGT6	SNAP91	MAP1LC3B
	FIS1	LILRA1	CCDC117	LAT2	FTSJ3	FBXO44	FAM132A	CXorf26	GGT8P	SNHG3-RCC1	MAP1LC3C
	FKBP10	LILRA2	CCDC11	LAYN	FUK	FBXO6	FAM134A	CXorf36	GGTLC1	SNHG7	MAP3K15
	FKBP2	LILRA3	CCDC121	LBH	FUNDC2	FBXW5	FAM135B	CXorf40B	GGTLC2	SNORA48	MAP7D2
	FKBP4	LILRA5	CCDC122	LBP	FURIN	FBXW9	FAM155B	CXorf50B	GINS1	SNORA67	MAPK12
	FKBP8	LILRA6	CCDC125	LCAT	FXR2	FCGBP	FAM158A	CXorf56	GINS2	SNX24	MARCO
	FKBPL	LILRB1	CCDC129	LCK	FXYD1	FCGR2B	FAM160B2	CYB5A	GINS4	SNX31	MARVELD1
	FLCN	LILRB2	CCDC135	LCN10	FXYD3	FCN3	FAM162A	CYB5R1	GIPC1	SOSTDC1	MAST2
	FLII	LILRB3	CCDC136	LCP2	FZD10	FDPS	FAM162B	CYB5R4	GIPC3	SOX8	MBNL2
	FLJ11235	LIMK2	CCDC13	LDB2	FZD9	FDX1L	FAM163A	CYBRD1	GIPR	SPACA4	MBOAT1
	FLJ23867	LIMS3	CCDC141	LDB3	G6PC3	FDXR	FAM164C	CYC1	GIT1	SPARCL1	MB
	FLJ36777	LIN7A	CCDC142	LDLRAD2	G6PD	FEN1	FAM166B	CYFIP1	GIYD2	SPATA24	MC1R
	FLJ37453	LIPG	CCDC144A	LDLR	GABARAPL2	FER1L4	FAM167B	CYGB	GJB1	SPOCD1	MCART6
	FLNB	LITAF	CCDC144B	LEFTY2	GABARAP	FGF11	FAM171A2	CYP11A1	GJB3	SPP1	MCHR1
	FLOT1	LMO3	CCDC144C	LENG9	GABRE	FGF17	FAM173A	CYP17A1	GJB5	SPRY4	MCM2
	FLOT2	LMOD3	CCDC144NL	LEPREL1	GADD45B	FGFBP2	FAM174A	CYP19A1	GJB6	SRRM3	MCTP2
	FLT3LG	LOC100124692	CCDC146	LFNG	GADD45GIP1	FGFBP3	FAM174B	CYP1B1	GJB7	SSTR1	MDC1
	FLYWCH2	LOC100126784	CCDC147	LGALS2	GADD45G	FGFR1	FAM176B	CYP26A1	GJC3	SSTR2	MED30
	FMO3	LOC100127888	CCDC148	LGALS9C	GAL3ST2	FGFR2	FAM178B	CYP27A1	GJD3	STC1	MEG3
	FMO4	LOC100130331	CCDC149	LGALS9	GALE	FGFR3	FAM183A	CYP27B1	GK3P	STX19	MEGF6
	FMO6P	LOC100130933	CCDC150	LGI3	GALK1	FGFR4	FAM189A1	CYP2A6	GK	STXBP1	MEIS1
	FN1	LOC100131496	CCDC151	LGI4	GALNTL2	FGGY	FAM189B	CYP2C8	GLB1L2	SUMO1P1	MEOX1
	FN3KRP	LOC100132247	CCDC152	LHFP	GALNTL4	FGR	FAM193B	CYP2D6	GLB1L3	SUMO4	MEOX2
	FN3K	LOC100132287	CCDC153	LHX2	GAL	FHIT	FAM195A	CYP2D7P1	GLOD5	SYDE1	MESP1
	FNDC4	LOC100132354	CCDC154	LIF	GAMT	FHL3	FAM195B	CYP2S1	GLP1R	SYN1	MESP2
	FOSL1	LOC100133161	CCDC155	LILRA1	GANAB	FHOD1	FAM19A5	CYP2U1	GLS2	SYNGR3	MET
	FOXD3	LOC100133545	CCDC157	LILRA2	GAPDH	FIBCD1	FAM24B	CYP39A1	GLT25D2	SYPL2	MEX3B
	FOXD4L1	LOC100133612	CCDC158	LILRA3	GAR1	FIBIN	FAM26F	CYP3A5	GLTPD1	SYT17	MFAP2
	FOXF1	LOC100272216	CCDC159	LILRA5	GAS2L1	FIBP	FAM36A	CYP3A7	GLYATL1	TAGLN3	MFAP4
	FOXF2	LOC100302650	CCDC15	LILRA6	GAS2L2	FIS1	FAM38A	CYP4B1	GLYATL2	TAL1	MFAP5
	FOXI1	LOC127841	CCDC160	LILRB1	GAS5	FITM1	FAM3A	CYP4F3	GM2A	TBCB	MFRP
	FOXK2	LOC145820	CCDC163P	LILRB2	GATA2	FKBP10	FAM3B	CYP51A1	GMDS	TBX19	MFSD4
	FOXM1	LOC150197	CCDC30	LILRB3	GATA5	FKBP1B	FAM43A	CYR61	GMNN	TBX2	MGC12982
	FOXO4	LOC150622	CCDC36	LILRB4	GATSL3	FKBP4	FAM43B	CYSLTR1	GMPR	TBX4	MGC14436
	FOXP2	LOC150786	CCDC39	LILRB5	GBAP1	FKBP5	FAM50A	CYTIP	GNA15	TBX5	MGC16025
	FOXQ1	LOC154761	CCDC3	LIMD2	GBA	FKBP8	FAM50B	CYTL1	GNG3	TBXA2R	MGC23270
	FPGS	LOC158376	CCDC40	LIME1	GBX2	FLAD1	FAM54A	CYYR1	GNG5	TCEAL2	MGC23284
	FPR2	LOC220429	CCDC41	LIMS2	GCAT	FLCN	FAM57B	DAAM2	GNLY	TCEAL7	MGC29506
	FRAT1	LOC257358	CCDC46	LIMS3-LOC440895	GCA	FLJ10357	FAM58A	DAD1	GOLGA2B	TCF15	MIAT
	FRS3	LOC282997	CCDC48	LIMS3	GCDH	FLJ13197	FAM64A	DAND5	GOLGA7B	TCF21	MIOX
	FSD1	LOC283392	CCDC50	LIN7A	GCHFR	FLJ35220	FAM65A	DAP3	GOLT1A	TCHH	MKNK2
	FSTL3	LOC284232	CCDC52	LINGO3	GCKR	FLJ39739	FAM66D	DAPP1	GPA33	TCTEX1D1	MKRN3
	FST	LOC284233	CCDC57	LIPG	GCK	FLJ45244	FAM72A	DAP	GPATCH4	TCTEX1D4	MLYCD
	FTH1	LOC284276	CCDC62	LMO2	GCNT3	FLJ45445	FAM73B	DARC	GPC5	TDRD1	MMEL1
	FTL	LOC284441	CCDC65	LMO3	GCSH	FLRT1	FAM82A2	DARS	GPD1L	TESC	MME
	FTSJ1	LOC285419	CCDC67	LMOD3	GDF15	FLYWCH2	FAM83D	DAZAP2	GPM6A	TEX14	MMP11
	FUK	LOC286002	CCDC68	LOC100128239	GDPD3	FMNL3	FAM83E	DBI	GPR109A	TEX19	MMP12
	FUNDC1	LOC286467	CCDC73	LOC100129066	GGH	FN3K	FAM83G	DBNL	GPR109B	TFAMP1	MMP13
	FUNDC2	LOC339674	CCDC74A	LOC100130872	GGT5	FNDC5	FAM83H	DCAF11	GPR110	TFG	MMP14
	FURIN	LOC344967	CCDC74B	LOC100133545	GGT7	FNDC8	FAM84B	DCAF12	GPR115	TFPI	MMP17
	FUT7	LOC388387	CCDC78	LOC100188949	GGTLC1	FNTB	FAM86A	DCAF13	GPR143	TFRC	MMP1
	FUZ	LOC388955	CCDC7	LOC100233209	GHDC	FOLR1	FAM86B2	DCAF15	GPR157	TGFB1I1	MMP23B
	FXR1	LOC389634	CCDC80	LOC100302650	GINS1	FOXA3	FAM89B	DCAF4	GPR158	TGFBI	MMP2
	FXR2	LOC399815	CCDC81	LOC121838	GIPC1	FOXD1	FAM96B	DCBLD1	GPR160	TGM5	MMP3
	FZD1	LOC400891	CCDC85A	LOC134466	GIPC2	FOXD2	FAM98C	DCDC2B	GPR172B	THAP8	MMP8
	FZD2	LOC401010	CCDC87	LOC145820	GIPC3	FOXD3	FANCA	DCI	GPR183	TIAF1	MORN5
	FZD6	LOC407835	CCDC88A	LOC150381	GIT1	FOXE3	FANCE	DCK	GPR19	TIMP1	MOV10L1
	FZD8	LOC440896	CCDC88B	LOC150622	GIYD2	FOXH1	FANCF	DCN	GPR27	TIMP3	MOXD1
	FZR1	LOC441177	CCDC89	LOC283174	GJA1	FOXI1	FANCG	DCPS	GPR37	TIPRL	MPHOSPH6
	G6PC3	LOC442454	CCDC8	LOC283392	GJA3	FOXM1	FARSA	DCST1	GPR39	TLE2	MPP2
	G6PD	LOC442459	CCDC93	LOC283731	GJA4	FOXN4	FASLG	DCST2	GPR3	TLE6	MPP6
	GAB2	LOC642846	CCDC96	LOC284276	GJB1	FOXP2	FASTK	DCTD	GPR61	TM4SF19	MRC1
	GABARAPL2	LOC643677	CCIN	LOC339524	GJB3	FOXRED1	FAU	DCTN1	GPR77	TMED7-TICAM2	MRGPRF
	GABARAP	LOC644172	CCL13	LOC342346	GJB6	FPGS	FBF1	DCTN2	GPR81	TMEM125	MRM1
	GABBR2	LOC647288	CCL14	LOC399959	GJC2	FRMD8	FBLL1	DCTN3	GPR87	TMEM132B	MS4A15
	GABRD	LOC649330	CCL16	LOC400891	GJD3	FRMPD1	FBN2	DCTN6	GPR97	TMEM132E	MS4A1
	GABRE	LOC723972	CCL17	LOC440896	GLA	FRS3	FBP1	DCTPP1	GPR98	TMEM145	MS4A2
	GABRP	LOC727896	CCL18	LOC441204	GLI4	FSCN1	FBRSL1	DCUN1D5	GPRC5A	TMEM147	MSH5
	GADD45A	LOC729020	CCL19	LOC441869	GLIPR1L2	FSTL3	FBRS	DCXR	GPRC5C	TMEM14E	MSLNL
	GADD45B	LOC729176	CCL21	LOC541471	GLOD4	FTCD	FBXL12	DDAH1	GPRC5D	TMEM151A	MSLN
	GADD45GIP1	LOC729603	CCL22	LOC55908	GLT25D2	FTHL3	FBXL14	DDB1	GPRIN1	TMEM155	MST1P2
	GADD45G	LOC84740	CCL23	LOC606724	GLTPD1	FTSJ3	FBXL15	DDC	GPRIN2	TMEM204	MST1P9
	GAK	LOC84856	CCL26	LOC642587	GLTSCR2	FUK	FBXL19	DDIT3	GPRIN3	TMEM213	MST1R
	GAL3ST1	LOC90246	CCL28	LOC653786	GMEB2	FUS	FBXL6	DDIT4L	GPT2	TMEM22	MST1
	GALE	LOC90586	CCL3L1	LOC728264	GMNN	FUT3	FBXL8	DDIT4	GPX2	TMEM233	MSTO2P
	GALK1	LOC96610	CCL3	LOC728392	GMPPA	FUT5	FBXO18	DDOST	GRAMD1B	TMEM35	MSX2P1
	GALNTL2	LONRF3	CCL4L2	LOC90246	GMPR	FUT6	FBXO27	DDO	GRAMD2	TMEM38B	MT1A
	GALT	LOXHD1	CCL8	LOC90586	GNA15	FXYD1	FBXO2	DDRGK1	GRAMD4	TMEM45A	MT1F
	GAMT	LPAR2	CCNB3	LOC91450	GNAI1	FXYD2	FBXO41	DDX18	GRB14	TMEM45B	MT1G
	GANAB	LPAR3	CCND2	LOXHD1	GNAS	FXYD6	FBXO44	DDX19B	GRB7	TMEM59L	MT1H
	GAPDH	LPCAT1	CCNDBP1	LOXL1	GNB1L	FXYD7	FBXO46	DDX1	GRHL1	TMEM81	MT1L
	GAS1	LPL	CCNG2	LPAR1	GNB2L1	FZD2	FBXO6	DDX23	GRHL2	TMOD1	MT1M
	GATA2	LRAT	CCNI	LPAR3	GNB2	FZD9	FBXW4	DDX27	GRHL3	TMPRSS4	MTCP1NB
	GATA5	LRFN5	CCNT1	LPHN2	GNG10	FZR1	FBXW5	DDX39	GRID2IP	TMPRSS5	MTFR1
	GATSL2	LRG1	CCR10	LPL	GNG11	G6PC3	FBXW9	DDX41	GRIK1	TNFRSF10D	MTHFSD
	GATSL3	LRP5L	CCR1	LPPR4	GNG13	GAA	FCGR1A	DDX47	GRIK4	TNNI3	MTMR9L
	GBAP1	LRRC10B	CCR2	LRCH2	GNG5	GABARAP	FCGR1B	DDX49	GRIN1	TNNT1	MTP18
	GBA	LRRC19	CCR3	LRFN1	GNL3	GABBR1	FCGRT	DDX52	GRIN2B	TNNT2	MUC16
	GBGT1	LRRC25	CCR4	LRFN5	GNPTG	GABRB2	FCHO1	DDX56	GRIN3B	TOX2	MUC5B
	GCHFR	LRRC2	CCR5	LRG1	GOLGA6L5	GABRD	FCHSD1	DDX59	GRIP1	TPD52	MUSTN1
	GCNT3	LRRC32	CCR6	LRMP	GOLGA7B	GAD1	FCN3	DEAF1	GRM3	TPM2	MVD
	GCSH	LRRC36	CCR7	LRP3	GOLGA8B	GADD45GIP1	FCRLA	DECR1	GRM4	TPPP3	MXI1
	GDF15	LRRC50	CCR9	LRRC25	GOLT1A	GADD45G	FCRLB	DECR2	GRM8	TPRXL	MYBPC2
	GDF6	LRRC70	CCRL1	LRRC2	GOT2	GAL3ST1	FDPS	DEFA1B	GRTP1	TPT1	MYEOV
	GDI1	LRRC7	CCRL2	LRRC32	GPAA1	GAL3ST2	FDXR	DEFB1	GSDMA	TPTE2P1	MYH10
	GDPD3	LRRIQ1	CCRN4L	LRRC33	GPC3	GALE	FER1L4	DEGS1	GSDMB	TREM1	MYH11
	GDPD5	LRRK2	CD160	LRRC36	GPC4	GALK1	FEZ1	DEM1	GSDMC	TREML3	MYH7B
	GEFT	LRRN4	CD163L1	LRRC4B	GPIHBP1	GALNS	FFAR2	DENND2A	GSG1L	TRIB3	MYL3
	GEMIN6	LST1	CD163	LRRC4	GPM6A	GALNT14	FGD3	DENND2D	GSG2	TRIM58	MYLK4
	GFER	LTA4H	CD164L2	LRRC55	GPN2	GALT	FGF13	DENR	GSTA1	TRIM7	MYO15A
	GGH	LTB4R	CD177	LRRK2	GPN3	GAMT	FGF17	DEPDC4	GSTO2	TRNP1	MYO15B
	GGT1	LXN	CD180	LRRN3	GPR108	GANAB	FGFR3	DERA	GTF2A1L	TRPC2	MYO1A
	GGTLC1	LY6D	CD19	LRRN4CL	GPR109B	GAP43	FGFR4	DERL2	GTF2H2B	TRPC3	MYO1G
	GHDC	LYG1	CD1D	LRRN4	GPR110	GAPDH	FHDC1	DES	GTF2IRD1	TRPC4	MYO1H
	GHITM	LYN	CD200R1	LSAMP	GPR116	GAS2L1	FHOD1	DET1	GTSE1	TRPC6	MYO3A
	GINS2	LYRM1	CD200	LST1	GPR137	GAS5	FIBCD1	DGCR6L	GUCY1A2	TRPM8	MYOZ2
	GIT1	LYVE1	CD207	LTBP2	GPR172A	GATSL3	FIS1	DGCR6	GUCY1B2	TRPV5	NAALADL1
	GJA3	LYZ	CD209	LTBP4	GPR172B	GBAP1	FKBP10	DGCR9	GYLTL1B	TSIX	NAB2
	GJC2	MACROD2	CD226	LTB	GPR1	GBX2	FKBP1B	DGKE	GZMB	TSLP	NALCN
	GKAP1	MADCAM1	CD22	LTC4S	GPR20	GCAT	FKBP2	DGUOK	H2AFB1	TSPAN12	NANOG
	GLA	MAFF	CD244	LTK	GPR3	GCDH	FKBP3	DHCR24	H2AFX	TSPAN7	NAPSA
	GLB1	MAGEC3	CD247	LUM	GPR4	GCGR	FKBP4	DHCR7	H2AFZ	TUBAL3	NARF
	GLDC	MAK16	CD274	LUZP2	GPR56	GCHFR	FKBP8	DHDH	HABP2	TUBB2B	NBL1
	GLIPR1L2	MAK	CD27	LY6H	GPR88	GCSH	FKBPL	DHDPSL	HAGHL	TUBB4	NBPF16
	GLIS2	MALL	CD28	LY86	GPR97	GDF1	FLAD1	DHFR	HAGH	TXNL1	NBR2
	GLOD4	MAL	CD2	LY96	GPT2	GDF5	FLJ11235	DHPS	HAL	TYRP1	NCAPD2
	GLRB	MAML2	CD300A	LY9	GPT	GDF9	FLJ12825	DHRS11	HAMP	UACA	NCR3
	GLRX3	MAMLD1	CD300C	LYL1	GPX1	GDI1	FLJ23867	DHRS4L2	HAP1	UAP1	NCRNA00107
	GLRX	MAOA	CD300E	LYPD1	GPX3	GDPD3	FLJ35390	DHRS4	HAS1	UBA2	NCRNA00115
	GLT8D1	MAP1B	CD300LB	LYVE1	GPX4	GDPD5	FLJ42289	DHRS7B	HAS3	UBC	NCRNA00167
	GLTP	MAP1LC3B2	CD300LF	LYZ	GRAMD2	GEFT	FLJ45244	DHRS7	HAVCR2	UBE2B	NCRNA00169
	GMFG	MAP2K1	CD300LG	LZTS1	GRB10	GEMIN4	FLJ45445	DHRS9	HBA1	UCA1	NCRNA00171
	GMPPA	MAP2K3	CD302	MAB21L2	GRB14	GEMIN7	FLJ90757	DHX29	HBEGF	UCK2	NCRNA00174
	GMPPB	MAP3K15	CD33	MACROD2	GRHPR	GET4	FLOT1	DHX30	HBG1	UCN2	NCRNA00175
	GMPR2	MAP3K5	CD37	MAF	GRIN1	GFI1	FLOT2	DHX35	HBG2	UIMC1	NCRNA00182
	GMPR	MAP3K6	CD38	MAGEL2	GRINA	GFRA2	FLYWCH2	DHX58	HCN2	UNC5C	NCRNA00189
	GNAS	MAP3K8	CD3E	MAL	GRPEL1	GGA1	FN3KRP	DIABLO	HCN4	UPB1	NCRNA00201
	GNB1L	MAPK11	CD3G	MAN1C1	GRPR	GGA2	FN3K	DIAPH1	HDGF	UPF0639	NCRNA00202
	GNB2L1	MAPK12	CD40LG	MAP1LC3C	GRRP1	GGA3	FNTB	DIMT1L	HDHD1A	UPK1A	NCRNA00219
	GNB2	MAPK4	CD40	MAP3K12	GSDMC	GGH	FOXA1	DIO3OS	HELLS	UQCRB	NCRNA00235
	GNG7	2018-03-10	CD48	MAP3K14	GSDMD	GGN	FOXA3	DIRAS3	HEMGN	UQCRFS1	NDRG1
	GNL1	2018-03-03	CD4	MAP3K8	GSK3A	GGT3P	FOXD1	DKC1	HEPACAM2	USHBP1	NDRG4
	GNL3	MARCO	CD52	MAP4K1	GSN	GGT7	FOXD4L1	DKFZp566F0947	HEPHL1	VAMP4	NEGR1
	GNPDA1	MAST1	CD53	MAP6	GSS	GIGYF1	FOXD4L6	DKFZp779M0652	HES2	VAPA	NEIL1
	GNPTG	MAST3	CD5	MAPK11	GSTA1	GINS2	FOXD4	DKK1	HES4	VAT1	NELL2
	GOLGA2	MAT1A	CD69	MAPK12	GSTM2	GIPC1	FOXE3	DKK3	HES6	VEGFA	NETO1
	GOLGA6A	MATN4	CD6	MASP1	GSTM5	GIPR	FOXF1	DLAT	HEY1	VEGFC	NEURL2
	GOLPH3	MBOAT7	CD70	MATK	GSTO1	GIT1	FOXH1	DLEU2L	HGD	VENTX	NEURL
	GORASP1	MCAM	CD79A	MATN2	GSTO2	GIYD2	FOXJ1	DLGAP3	HGFAC	VGLL1	NFATC4
	GOT1	MCF2L2	CD79B	MCAM	GSTP1	GJB6	FOXM1	DLGAP5	HGF	VGLL3	NGEF
	GOT2	MCF2	CD7	MCF2L	GSTT2	GJC2	FOXP4	DLK2	HHIPL2	VIM	NHEDC1
	GPAA1	MCHR1	CD80	MCHR1	GTF2A2	GLB1L2	FOXS1	DLL1	HHIP	VIPR1	NHS
	GPATCH3	MCM10	CD83	MCTP1	GTF2H4	GLI4	FPGS	DLL4	HIGD1B	VIP	NINL
	GPC5	MCTP1	CD84	ME3	GTF3C6	GLIS1	FRAT1	DLST	HIST1H1B	VPS37D	NIPAL2
	GPIHBP1	MCTP2	CD86	MECOM	GTPBP3	GLIS2	FRAT2	DLX6	HIST1H1C	VSIG10L	NIPSNAP3B
	GPI	MECOM	CD8A	MEF2B	GTPBP4	GLT25D1	FRS3	DMBT1	HIST1H1D	VWA3A	NKAIN4
	GPKOW	MEFV	CD8B	MEFV	GTPBP5	GLT25D2	FSD1	DMD	HIST1H2AC	VWA3B	NKD2
	GPN2	MEI1	CD93	MEG3	GUCA1B	GLTPD1	FSIP1	DMKN	HIST1H2AD	VWF	NLGN4X
	GPN3	MEIG1	CD96	MEGF6	GUCY1B3	GLTSCR1	FSTL4	DMRT3	HIST1H2AE	WBSCR17	NLRP1
	GPR107	MEIS1	CD97	MEI1	GUK1	GLTSCR2	FTCD	DNAH3	HIST1H2AG	WBSCR26	NMNAT2
	GPR108	MEOX1	CDA	MEIS1	GYG1	GMEB2	FTHL3	DNAJA1	HIST1H2AH	WDR49	NMUR1
	GPR109B	MEST	CDC14A	MEIS2	GYLTL1B	GMPPA	FTSJ3	DNAJA2	HIST1H2AK	WDR54	NOD2
	GPR137	METTL7B	CDC14B	MEOX1	GZMM	GMPR	FUNDC1	DNAJB13	HIST1H2AL	WDR87	NODAL
	GPR143	MET	CDC14C	MEOX2	H1F0	GNAS	FUNDC2	DNAJB1	HIST1H2AM	WFDC1	NOG
	GPR158	MFSD2A	CDC27	MERTK	H1FX	GNB1L	FURIN	DNAJC10	HIST1H2BC	WIPI1	NOL3
	GPR172A	MGAM	CDC42BPA	MESTIT1	H2AFX	GNB2L1	FUS	DNAJC11	HIST1H2BD	WISP3	NOTUM
	GPR26	MGC12916	CDC42EP3	MEST	H2AFZ	GNB2	FUT1	DNAJC17	HIST1H2BE	WSCD1	NPC1L1
	GPR56	MGC14436	CDCP1	MFAP2	H2BFXP	GNB3	FUZ	DNAJC1	HIST1H2BF	WTIP	NPM2
	GPR83	MGC16025	CDCP2	MFAP4	HADHB	GNG7	FXYD3	DNAJC25	HIST1H2BG	WWC1	NPR3
	GPRC5B	MGC16384	CDH11	MFNG	HADH	GNL1	FZD2	DNAJC28	HIST1H2BH	XKR6	NPW
	GPRC5C	MGC42105	CDH12	MFRP	HAGHL	GNPAT	G0S2	DNAJC7	HIST1H2BJ	YBX2	NPY5R
	GPS1	MGC87042	CDH13	MFSD2A	HAGH	GOLGA8A	G6PC3	DNAJC8	HIST1H2BK	YPEL4	NR1D1
	GPS2	MIA	CDH15	MFSD7	HAND2	GOLGA8B	G6PD	DNAJC9	HIST1H2BL	YSK4	NRG1
	GPSM1	MIOX	CDH17	MGAM	HAPLN2	GOT1	GABARAPL2	DNAL4	HIST1H2BM	ZDBF2	NRIP2
	GPX1	MIR155HG	CDH19	MGAT3	HAPLN3	GPAA1	GABARAP	DNASE1L3	HIST1H2BN	ZFP92	NRN1L
	GPX3	MKRN3	CDH20	MGAT5B	HARS	GPATCH3	GABBR2	DNASE2B	HIST1H2BO	ZNF114	NRTN
	GPX4	MLC1	CDH22	MGC12916	HAT1	GPATCH4	GABRD	DNASE2	HIST1H3D	ZNF204P	NSMCE2
	GRAMD1A	MLKL	CDH23	MGC16025	HAUS4	GPC1	GADD45GIP1	DNER	HIST1H3G	ZNF467	NSUN6
	GRB14	MLXIPL	CDH26	MGC16121	HAUS7	GPC2	GADD45G	DNLZ	HIST1H3H	ZNF503	NSUN7
	GRB2	MMP12	CDH2	MGC29506	HBA1	GPC5	GAK	DNPEP	HIST1H3J	ZNHIT2	NTF3
	GRB7	MMP19	CDH4	MGC87042	HBA2	GPI	GALE	DNTTIP1	HIST1H4B		NTRK1
	GRHL1	MMP1	CDH5	MIAT	HBB	GPKOW	GALK1	DNTTIP2	HIST1H4C		NTSR1
	GRIK5	MMP25	CDH6	MICALCL	HBD	GPM6A	GALM	DOC2B	HIST1H4D		NUBPL
	GRINA	MMP7	CDH8	MICB	HBEGF	GPR108	GALNT14	DOCK11	HIST1H4E		NUDT13
	GRIPAP1	MMP8	CDHR1	MINA	HBG1	GPR137	GALNT6	DOCK6	HIST1H4I		NXF3
	GRK6	MMP9	CDHR2	MIR155HG	HBG2	GPR153	GALT	DOCK8	HIST1H4J		NXN
	GRN	MMRN1	CDHR3	MMD	HCFC1R1	GPR161	GAMT	DOK1	HIST2H2AA3		NXPH2
	GRPEL1	MMRN2	CDHR4	MMEL1	HCG27	GPR162	GAPDH	DOK5	HIST2H2AB		NXPH4
	GRRP1	MND1	CDHR5	MME	HCN2	GPR172A	GAS2L1	DOLK	HIST2H2AC		OBP2B
	GSDMB	MNX1	CDK12	MMP12	HCN3	GPR172B	GAS2L2	DPEP1	HIST2H2BA		OCLM
	GSDMD	MOCS1	CDK13	MMP17	HCST	GPR173	GATA2	DPEP3	HIST2H2BE		OGN
	GSK3A	MOGAT1	CDK14	MMP19	HDAC10	GPR35	GATA3	DPF3	HIST2H2BF		OLFM1
	GSR	MORF4	CDK18	MMP1	HDAC11	GPR37L1	GATA5	DPH1	HIST2H3C		OLFM4
	GSS	MORN5	CDK19	MMP23B	HDAC1	GPR37	GATC	DPH5	HIST2H3D		OMD
	GSTA1	MOV10L1	CDK20	MMP25	HDAC3	GPRC5C	GATSL3	DPM1	HIST2H4A		OPN3
	GSTK1	MPO	CDK5R1	MMP28	HDAC5	GPS1	GBA2	DPM3	HIST3H2A		OPRK1
	GSTO1	MPP1	CDKAL1	MMP2	HDAC7	GPSM1	GBAP1	DPP3	HIST3H2BB		OR10AD1
	GSTP1	MPZL2	CDKL1	MMP8	HDDC3	GPT2	GBA	DPP4	HIVEP3		OR13J1
	GSTT1	MPZ	CDKL2	MMP9	HDGF	GPT	GCAT	DPP7	HJURP		OR2A1
	GSTT2	MRAP2	CDKL3	MMRN1	HDHD3	GPX1	GCDH	DPY19L3	HK2		OR2B6
	GTF2E2	MRC1	CDKL4	MMRN2	HERC5	GRAMD1A	GCGR	DPY30	HLA-C		OR4F29
	GTF2F1	MS4A14	CDKL5	MN1	HES6	GRAMD4	GCHFR	DPYSL2	HLA-DOA		OR7A5
	GTF2H5	MS4A15	CDKN1C	MNDA	HES7	GRHPR	GCK	DPYSL5	HLA-DPA1		OR7C1
	GTF2IRD1	MS4A1	CDKN2BAS	MOBKL2B	HEXIM2	GRID2IP	GCM1	DQX1	HLA-DPB1		OSR1
	GTF3C5	MSH5	CDNF	MOCS1	HEY2	GRIK2	GDF15	DR1	HLA-DPB2		OXCT2
	GTPBP2	MSLN	CDON	MOV10L1	HGFAC	GRIK4	GDF1	DRAM2	HLA-DQA1		OXR1
	GTPBP5	MSN	CDR1	MOXD1	HGS	GRIN2D	GDI1	DRAP1	HLA-DQA2		P2RX1
	GUCY1B3	MSX2	CDRT15P	MPEG1	HHLA3	GRIN3B	GDPD1	DRG1	HLA-DQB1		P2RX2
	GUK1	MT1A	CDRT1	MPO	HIF3A	GRINA	GDPD3	DSC1	HLA-DQB2		P4HA1
	GUSB	MT1E	CDSN	MPP1	HIGD1B	GRIP2	GEFT	DSC2	HLA-DRA		P4HA3
	GYS2	MT1F	CDX1	MPP4	HIGD2A	GRM3	GEMIN6	DSCAM	HLA-DRB1		PABPC1L
	H1F0	MT1G	CDYL2	MRAP2	HINT1	GRM4	GEMIN7	DSCR3	HLA-DRB5		PABPC1P2
	H1FX	MT1H	CEACAM1	MRC1	HINT2	GRN	GET4	DSN1	HLA-DRB6		PABPC1
	H2AFB1	MT1L	CEACAM21	MRGPRF	HIP1R	GRWD1	GFER	DSTN	HLA-G		PABPC3
	H2AFX	MT1M	CEACAM22P	MRM1	HIRIP3	GSC	GFRA1	DTD1	HLA-J		PABPC5
	H2AFY	MT1X	CEACAM3	MRS2P2	HIST3H2A	GSDMD	GGA1	DTNA	HMBS		PACSIN1
	H2AFZ	MT2A	CEACAM4	MRVI1	HLX	GSG1L	GGA3	DTNBP1	HMG20B		PADI2
	H2BFXP	MT3	CECR1	MS4A14	HMBS	GSK3A	GGH	DULLARD	HMGA1		PADI3
	HABP4	MTHFD1L	CECR2	MS4A15	HMG20B	GSN	GGN	DUOX1	HMGB3		PAH
	HADH	MTMR8	CECR4	MS4A1	HMGA1	GSTA1	GGT1	DUOX2	HMGCLL1		PAIP2B
	HAGHL	MTP18	CECR6	MS4A2	HMGB2	GSTP1	GGT5	DUOXA1	HMGCR		PAK3
	HAGH	MTTP	CECR7	MS4A4A	HMGCL	GSTT1	GGTLC1	DUS1L	HMGCS1		PAN2
	HAND2	MUC13	CELF2	MS4A6A	HMGN2	GSTZ1	GGTLC2	DUSP12	HMGCS2		PAQR5
	HAP1	MUC15	CELF3	MSC	HMGN3	GTF2A1L	GHDC	DUSP14	HMGN3		PAR-SN
	HAR1A	MUC16	CELF4	MSLNL	HMMR	GTF2H4	GHITM	DUSP16	HMHA1		PAR5
	HARS2	MUC4	CELF5	MSR1	HN1L	GTF2IRD1	GIMAP1	DUSP1	HMMR		PASK
	HAUS4	MUC5B	CELF6	MSX1	HNF1A	GTF3C5	GINS1	DUSP23	HN1L		PBX4
	HAUS5	MXD1	CELSR3	MSX2P1	HNRNPA0	GTPBP3	GINS2	DUSP9	HN1		PCDH11X
	HAUS7	MYBPC1	CEND1	MT1A	HNRNPL	GTSE1	GIPC1	DUT	HOMER1		PCDHA10
	HAX1	MYBPC2	CENPC1	MT1H	HOMER3	GUCA1B	GIPR	DYM	HOMER2		PCDHA12
	HBA1	MYBPC3	CENPJ	MT3	HOOK2	GUK1	GIT1	DYNC1I1	HOOK1		PCDHA2
	HBA2	MYBPH	CEP120	MTHFR	HOPX	GUSB	GIYD2	DYNC1I2	HOPX		PCDHA3
	HBB	MYCT1	CEP135	MTMR9L	HOXA4	GYLTL1B	GJA3	DYNC1LI1	HOTAIR		PCDHA4
	HCFC1R1	MYH11	CEP152	MUC12	HOXA5	GYS1	GJA4	DYNC2LI1	HOXB13		PCDHA5
	HCG4	MYH15	CEP164	MUC4	HOXB5	GZMM	GJA5	DYNLL1	HOXC11		PCDHA6
	HCN2	MYH3	CEP170L	MUM1L1	HOXB8	H19	GJD3	DYNLL2	HOXC12		PCDHA9
	HDAC10	MYO15A	CEP170	MXRA8	HOXC10	H1FX	GKAP1	DYNLRB1	HOXC13		PCDHB12
	HDAC11	MYO16	CEP192	MYBPC2	HOXC13	H2AFX	GLI4	DYNLRB2	HPCAL1		PCDHB13
	HDAC1	MYO1F	CEP290	MYBPC3	HOXD10	H2AFY2	GLIS2	DYNLT1	HPCAL4		PCDHB14
	HDAC3	MYO1G	CEP350	MYCT1	HOXD1	H2AFZ	GLO1	DYNLT3	HPDL		PCDHB15
	HDAC5	MYO7B	CEP63	MYH11	HOXD9	H2BFXP	GLOD5	DYRK4	HPGD		PCDHB17
	HDAC6	MYOCD	CEP68	MYH15	HPCAL1	HAAO	GLRB	DYSF	HPN		PCDHB18
	HDDC2	MYOM2	CEP97	MYL3	HPCA	HAGHL	GLRX2	DYX1C1	HPSE		PCDHB19P
	HDDC3	MYOM3	CERKL	MYL4	HPDL	HAPLN1	GLRX5	E2F4	HPX		PCDHB2
	HDGFRP2	MYOZ1	CERK	MYLK	HPD	HAPLN2	GLTPD1	EAPP	HP		PCDHB3
	HDGFRP3	MYOZ2	CES3	MYO16	HPN	HAR1A	GLYR1	EBAG9	HRASLS2		PCDHB4
	HDGF	NACA2	CES4	MYO1A	HPRT1	HARS2	GMEB2	EBF4	HRASLS		PCDHB6
	HDHD1A	NAMPT	CETP	MYO1F	HPX	HAS2AS	GMFG	EBI3	HRNBP3		PCDHB7
	HDHD3	NAP1L5	CFB	MYO1G	HP	HAUS4	GMPPA	EBNA1BP2	HR		PCDHB8
	HECTD3	NAP1L6	CFHR3	MYO7B	HRASLS2	HAUS5	GMPR2	EBPL	HS3ST5		PCDHGA1
	HEMK1	NAPSA	CFH	MYOCD	HRASLS5	HAUS7	GMPR	EBP	HS6ST2		PCDHGA2
	HERC5	NARF	CFLAR	MYOM2	HRASLS	HAUS8	GNA15	ECE1	HS6ST3		PCDHGA3
	HES6	NAV2	CFLP1	MYOM3	HRAS	HBA1	GNAS	ECEL1	HSBP1L1		PCDHGA5
	HES7	NAV3	CFP	MYOZ1	HRCT1	HBA2	GNAZ	ECH1	HSD11B1		PCDHGA8
	HEXB	NCAM2	CG030	MYOZ3	HRC	HBB	GNB1L	ECHDC3	HSD17B2		PCDHGA9
	HEXIM2	NCAN	CGB7	MYRIP	HRH4	HCFC1R1	GNB2	ECHS1	HSD17B6		PCDHGB3
	HGD	NCF1B	CGNL1	NAALAD2	HRK	HCG27	GNG4	ECM1	HSD17B7P2		PCDHGB8P
	HGS	NCF1C	CGRRF1	NAP1L2	HRSP12	HCN2	GNLY	ECSCR	HSD17B7		PCDP1
	HHATL	NCF1	CH25H	NAPSA	HS6ST1	HCN3	GNPAT	ECSIT	HSP90AA1		PCK1
	HHLA3	NCF2	CHAD	NAPSB	HSCB	HDAC10	GNPTG	EDAR	HSP90AB1		PCMTD1
	HIGD1A	NCF4	CHD1	NAT2	HSD11B1L	HDAC1	GOT1	EDF1	HSPA1A		PCOLCE2
	HIGD1B	NCOA7	CHD2	NAT8B	HSD11B1	HDAC3	GOT2	EDN1	HSPA1B		PCP2
	HIGD2A	NCRNA00120	CHD3	NAV1	HSD11B2	HDAC5	GPAA1	EDN2	HSPA2		PCP4L1
	HINFP	NCRNA00167	CHD5	NBL1	HSD17B10	HDAC6	GPATCH4	EDNRA	HSPA8		PCP4
	HINT1	NCRNA00175	CHD6	NBPF16	HSD17B11	HDDC3	GPC1	EDNRB	HSPBP1		PCSK4
	HINT2	NCRNA00189	CHD7	NCAM2	HSD17B2	HDGFRP2	GPER	EEF1A1P9	HSPD1		PDE1A
	HIPK4	NCRNA00204B	CHD9	NCAN	HSD17B7P2	HDGF	GPI	EEF1A1	HSPE1		PDE4C
	HIRA	NDRG1	CHGA	NCF1	HSD17B7	HEATR7A	GPN3	EEF1A2	HSPH1		PDE7A
	HIRIP3	NDST3	CHGB	NCF2	HSD17B8	HECTD3	GPR108	EEF1B2	HTR1B		PDGFD
	HIST1H1C	NECAB1	CHI3L1	NCF4	HSD3B7	HEMK1	GPR115	EEF1DP3	HTR3A		PDGFRA
	HIST1H2BK	NEDD9	CHI3L2	NCR3	HSF1	HERC2P4	GPR120	EEF1E1	HUS1B		PDGFRL
	HIST1H4H	NETO2	CHIC1	NCRNA00175	HSF4	HES4	GPR137	EEF1G	HYAL1		PDK1
	HIST2H4A	NEU4	CHIC2	NCRNA00235	HSP90AA1	HES5	GPR143	EEF2	HYAL3		PDK4
	HIST3H2BB	NEURL2	CHIT1	NDN	HSP90AB1	HES6	GPR153	EFCAB10	HYOU1		PDLIM3
	HLA-C	NFASC	CHL1	NEAT1	HSP90B1	HES7	GPR162	EFCAB3	IBSP		PDPN
	HLA-DRB5	NFE2	CHML	NEFM	HSPA12B	HEXDC	GPR172A	EFCAB6	ICAM1		PDXDC2
	HLA-DRB6	NFIL3	CHN2	NES	HSPA1A	HEXIM2	GPR20	EFEMP1	ICAM4		PDZK1IP1
	HLA-E	NFKB1	CHODL	NETO1	HSPA1B	HEY2	GPR35	EFHA1	ICAM5		PDZK1P1
	HMBS	NFKB2	CHORDC1	NEURL1B	HSPA2	HFE2	GPR37	EFHA2	ICOS		PEBP4
	HMGA1	NFKBIA	CHRDL1	NEXN	HSPB1	HGFAC	GPR4	EFHB	ID1		PEG3
	HMGB2	NFKBID	CHRD	NFASC	HSPB2	HGS	GPR56	EFHC2	IDH2		PELI2
	HMGB3	NFKBIE	CHRFAM7A	NFE2	HSPB6	HHATL	GPR68	EFHD1	IDI1		PFKFB1
	HMGCL	NFKBIZ	CHRM1	NFKBIA	HSPB7	HHAT	GPR84	EFNA1	IDO1		PFKFB3
	HMGCS1	NGF	CHRM3	NGFR	HSPB8	HHIPL2	GPR89B	EFNB2	IER2		PFKFB4
	HMGN3	NHEDC2	CHRM4	NGF	HSPBP1	HHIP	GPRC5A	EFS	IER3		PFKP
	HMMR	NIPAL1	CHRM5	NID2	HSPC157	HHLA3	GPRC5C	EFTUD1	IER5		PGM1
	HMOX1	NIPAL4	CHRNA10	NKAIN4	HSPD1	HIF3A	GPRIN1	EFTUD2	IFI30		PGM5P2
	HMOX2	NLGN1	CHRNA1	NKAPL	HSPE1	HIGD1B	GPS1	EGFL6	IFI6		PGM5
	HMP19	NLGN4X	CHRNA3	NKD1	HTR6	HIGD2A	GPS2	EGFL8	IGF2BP2		PGR
	HN1L	NLRC4	CHRNA7	NKD2	HTRA2	HINFP	GPSM1	EGF	IGFALS		PHKG1
	HN1	NLRP12	CHRNB2	NKG7	HYAL1	HIRIP3	GPSM3	EGLN3	IGFBPL1		PHYH
	HNRNPA0	NLRP3	CHRNB4	NLRC4	HYAL2	HIST1H1C	GPT2	EI24	IGSF10		PI15
	HNRNPAB	NLRP6	CHRNE	NLRP12	HYAL3	HIST1H3H	GPX1	EID1	IGSF3		PI4KAP1
	HNRNPC	NME2P1	CHRNG	NLRP3	HYI	HJURP	GPX3	EID2	IGSF6		PID1
	HNRNPL	NMUR1	CHST10	NMUR1	HYLS1	HK2	GPX4	EIF1AX	IGSF8		PIF1
	HOMER2	NMU	CHST13	NOG	IARS2	HLA-DQA2	GRAMD1A	EIF1B	IGSF9		PIGV
	HOXB4	NNMT	CHST15	NOS2	ICAM2	HLA-F	GRAMD4	EIF1	IL12A		PIM2
	HOXB7	NOD1	CHST1	NOS3	ICAM5	HLA-G	GRAP	EIF2B1	IL12RB1		PIP5KL1
	HOXC10	NOD2	CHST2	NOTCH4	ICT1	HLA-H	GRB2	EIF2B2	IL17B		PIWIL2
	HOXC11	NOG	CHST3	NOVA1	ID3	HLA-J	GRB7	EIF2B3	IL17RE		PKD1L1
	HOXC13	NOL4	CHST4	NOVA2	IDH1	HMBS	GREM2	EIF2S2	IL1A		PKD1L2
	HOXD1	NOS1	CHST5	NPB	IDH2	HMG20B	GRHL2	EIF2S3	IL1B		PKD1L3
	HPCA	NOS2	CHST6	NPDC1	IDH3G	HMGB2	GRHL3	EIF3CL	IL1RL1		PKD1
	HPS1	NOS3	CHST7	NPHS1	IDI1	HMGB3	GRIA2	EIF3D	IL1RN		PKDCC
	HPS6	NOTCH4	CHST9	NPIPL3	IDUA	HMGCL	GRINA	EIF3E	IL22RA1		PKDREJ
	HRASLS	NOVA2	CHSY3	NPL	IER2	HMGN2	GRIPAP1	EIF3F	IL22RA2		PKHD1L1
	HRAS	NPHS1	CIDECP	NPR1	IER3	HMGN3	GRK6	EIF3G	IL28RA		PKP1
	HRC	NPPA	CIDEC	NPTX1	IER5	HMHA1	GRM1	EIF3H	IL7R		PLA2G2A
	HRH3	NPR1	CIITA	NR1I2	IFI27L2	HMMR	GRM4	EIF3IP1	IL8		PLA2G4D
	HRH4	NPR3	CILP2	NR2E3	IFITM1	HN1	GRM8	EIF3I	IL9R		PLA2G5
	HS1BP3	NPTX1	CILP	NR2F1	IFITM2	HNF1A	GRN	EIF3K	ILDR1		PLA2G6
	HS6ST1	NPTX2	CISH	NR4A1	IFITM3	HNRNPL	GRTP1	EIF3L	ILDR2		PLAC2
	HSBP1L1	NR1I2	CITED2	NR4A3	IFRD2	HOMER3	GSC	EIF3M	ILF2		PLAC9
	HSBP1	NR4A2	CKM	NR5A2	IFT20	HOOK2	GSDMA	EIF4A1	IMPA2		PLAU
	HSD11B1L	NR4A3	CLASP1	NRADDP	IFT52	HOTAIR	GSDMB	EIF4A3	INADL		PLCH2
	HSD11B1	NR5A1	CLASP2	NRG1	IGBP1	HOXA10	GSDMD	EIF4B	INA		PLCXD1
	HSD11B2	NR5A2	CLCN1	NRGN	IGF2BP2	HOXA11AS	GSK3A	EIF4EBP1	INCENP		PLD5
	HSD17B10	NRCAM	CLCN4	NRN1	IGFBP1	HOXA11	GSTM2	EIF4EBP3	INMT		PLEKHF1
	HSD17B14	NRG3	CLCN5	NRP1	IGFBP2	HOXA3	GSTO1	EIF4E	INPP5J		PLEKHG4B
	HSF1	NRGN	CLCNKA	NRXN2	IGFBP6	HOXA4	GSTP1	EIF4G2	INSIG1		PLEKHG4
	HSF4	NSUN7	CLCNKB	NRXN3	IGFBP7	HOXA5	GSTT2	EIF4H	INSL3		PLEKHH2
	HSP90AA1	NTF4	CLDN10	NTF4	IGSF8	HOXA6	GTF2E2	EIF5A	IP6K3		PLIN1
	HSP90AB1	NTNG1	CLDN11	NTM	IGSF9	HOXA7	GTF2F1	EIF6	IQCD		PLIN2
	HSPA1A	NTRK3	CLDN14	NTNG1	IL11	HOXA9	GTF2H2B	ELAC2	IQCH		PLIN4
	HSPA1B	NTSR1	CLDN15	NTNG2	IL13RA2	HOXB5	GTF2H4	ELANE	IQGAP3		PLIN5
	HSPA4	NUP210L	CLDN16	NTRK1	IL17RC	HOXB6	GTF2IRD1	ELAVL2	IRF1		PLN
	HSPA5	NUPL1	CLDN18	NUAK1	IL1R2	HOXB8	GTF3A	ELK3	IRF6		PLTP
	HSPA6	NWD1	CLDN20	NUAK2	IL1RL1	HOXB9	GTF3C5	ELL3	IRF7		PLXNA3
	HSPA8	NXF3	CLDN2	OAF	IL1RN	HOXC10	GTPBP2	ELMO3	IRX2		PLXNA4
	HSPA9	NXPH2	CLDN3	OCM	IL20RA	HOXC11	GTPBP3	ELMOD2	IRX3		PLXNB3
	HSPB1	NXPH4	CLDN5	ODF3L2	IL22RA1	HOXC12	GTPBP5	ELN	IRX4		PLXNC1
	HSPB2	OBFC2A	CLDN6	OGDHL	IL27RA	HOXC13	GTSE1	ELOF1	IRX5		PM20D1
	HSPBP1	OCA2	CLDN8	OGN	IL33	HOXD10	GUCY1B2	ELOVL1	ISG15		PM20D2
	HSPC157	ODF3L2	CLDN9	OLFM1	IL34	HOXD1	GUCY2D	ELOVL3	ISG20		PMFBP1
	HSPD1	OGDHL	CLDND1	OLFM4	IL3RA	HOXD3	GUK1	ELOVL4	ISL2		PNCK
	HSPE1	OLAH	CLDND2	OLFML1	ILF2	HOXD9	GUSB	ELOVL7	ISOC1		PNLDC1
	HTT	OLFM1	CLEC10A	OLFML2B	ILKAP	HPCAL1	GYG2	ELP2	ITGA2B		PNOC
	HYAL2	OLFM4	CLEC12A	OLR1	ILVBL	HPDL	GYS1	ELP3	ITGA3		PNPLA3
	HYAL3	OLIG1	CLEC12B	OR4F29	IMP4	HRASLS2	GZMH	ELTD1	ITGA8		PODNL1
	HYI	OLIG2	CLEC14A	OR52N4	IMPA2	HRASLS	GZMM	EMCN	ITGAX		PODN
	HYOU1	OLR1	CLEC16A	ORM1	IMPDH1	HRAS	H1F0	EMD	ITGB6		POF1B
	IAH1	ONECUT2	CLEC18A	OSBPL7	IMPDH2	HRC	H1FX	EMG1	ITIH2		POLM
	ICAM2	OPRK1	CLEC18B	OSCAR	INF2	HRNBP3	H2AFB1	EMID1	ITIH5L		POM121L10P
	ICAM3	OR13A1	CLEC18C	OSM	ING4	HR	H2AFX	EMILIN1	ITPK1		POM121L1P
	ICAM5	OR2A25	CLEC1A	OTOA	INHBB	HS3ST5	H2AFY	EMILIN3	ITPR3		POM121L4P
	ICT1	OR2A7	CLEC2B	OTUD7A	INMT	HS6ST2	H2AFZ	EML2	IYD		POM121L8P
	ID3	OR4F29	CLEC2D	OXER1	INO80B	HSD11B1L	H2BFXP	EMP1	IZUMO1		POM121L9P
	IDH3B	ORM1	CLEC4A	P2RX1	INO80C	HSD11B2	H3F3C	EMP3	JAKMIP1		PON3
	IDH3G	OSCAR	CLEC4D	P2RY10	INPP5E	HSD17B10	HAGHL	EMR1	JAKMIP2		POSTN
	IDO1	OSMR	CLEC4E	P2RY11	INTS4L2	HSD17B1	HAGH	EMR3	JARID2		POU2AF1
	IDUA	OSM	CLEC4GP1	P2RY12	INTS5	HSD17B8	HAPLN1	EN1	JPH1		POU2F3
	IFI27L1	OSTCL	CLEC4G	P2RY13	IP6K2	HSF1	HARS2	ENDOD1	JPH2		POU5F1
	IFITM2	OVCH1	CLEC5A	P2RY14	IP6K3	HSF4	HARS	ENDOG	JUNB		PPAPDC1A
	IFITM3	OXGR1	CLEC7A	P2RY2	IPO13	HSP90AB1	HAUS7	ENG	JUND		PPARGC1A
	IFRD2	P2RX1	CLECL1	P2RY6	IQGAP3	HSPA1A	HAX1	ENO1	JUN		PPFIA4
	IFT20	P2RX2	CLGN	P4HA3	IRAK1	HSPA1B	HBA1	ENO3	JUP		PPIE
	IFT46	P2RX5	CLIC2	PADI4	IRX3	HSPA2	HBA2	ENOPH1	KANK4		PPIP5K1
	IGBP1	P4HA1	CLIC4	PALM	IRX4	HSPA6	HBB	ENOX1	KBTBD8		PPM1J
	IGF2AS	P704P	CLIC5	PAMR1	IRX6	HSPA7	HBD	ENOX2	KCNA5		PPM1N
	IGFBP6	PA2G4P4	CLIC6	PAPPA	ISCA1P1	HSPB1	HBG1	ENPEP	KCNC3		PPP1R3B
	IGSF11	PABPC3	CLIP1	PAPSS2	ISG15	HSPB7	HBG2	ENPP2	KCNE1		PPP1R3E
	IGSF8	PACRG	CLIP2	PARM1	ISOC2	HSPB8	HCCS	ENPP3	KCNF1		PPP1R3G
	IKBKG	PADI4	CLIP3	PARP15	ISYNA1	HSPBP1	HCFC1R1	ENPP5	KCNG1		PPP2R3B
	IK	PAG1	CLIP4	PARP8	ITFG3	HSPC157	HCN2	ENPP6	KCNG2		PPYR1
	IL15RA	PAH	CLK1	PARVG	ITGA10	HSPE1	HCN3	ENTPD2	KCNG3		PRCD
	IL17RC	PALM2-AKAP2	CLK2P	PCDH12	ITGA2B	HTRA1	HDAC10	ENY2	KCNH2		PRDM12
	IL1R2	PALM2	CLK3	PCDH15	ITGA5	HTRA2	HDAC11	EOMES	KCNH3		PRDM6
	IL8	PAPL	CLK4	PCDH17	ITGA7	HTRA3	HDAC1	EPAS1	KCNH7		PRDXDD1P
	ILK	PAPPA2	CLLU1	PCDH7	ITGB1BP1	HYAL1	HDAC5	EPB41L4B	KCNH8		PRELP
	IMP4	PAPPA	CLMN	PCDHA12	ITIH1	HYAL3	HDDC2	EPB42	KCNJ11		PRINS
	IMPDH1	PARK2	CLN8	PCDHA9	ITM2A	IAH1	HDGFRP2	EPB49	KCNJ15		PRKCG
	IMPDH2	PART1	CLOCK	PCDHAC2	ITPA	IBSP	HDGF	EPCAM	KCNJ16		PRKCZ
	ING4	PAX6	CLSTN2	PCDHB15	ITPKA	ICAM5	HDHD3	EPDR1	KCNK17		PRKG2
	INHBE	PBX4	CLTCL1	PCDHGA9	ITPKC	ID3	HEATR6	EPHA2	KCNK1		PRO0611
	INO80E	PCBP3	CLTC	PCDHGB7	IVD	IDH2	HEATR7A	EPHA3	KCNK3		PROCA1
	INPP5E	PCDH10	CLUAP1	PCDP1	JAG2	IDH3B	HES1	EPHX1	KCNK5		PRODH
	INPP5J	PCDH11X	CLUL1	PCK1	JAGN1	IDH3G	HES4	EPHX2	KCNMB1		PRPH2
	INPP5K	PCDH15	CLVS1	PCSK1N	JAM2	IDUA	HES5	EPHX3	KCNN1		PRR11
	INPPL1	PCDH17	CLYBL	PCSK1	JMJD8	IFI27L1	HES6	EPO	KCNN2		PRR16
	INSIG1	PCDH20	CMAH	PCSK2	JOSD2	IFI27L2	HES7	EPR1	KCNN4		PRRG3
	INTS10	PCDHA10	CMKLR1	PCSK5	JPH2	IFITM2	HEXDC	EPRS	KCNQ1		PRRT1
	INTS5	PCDHA12	CMTM1	PCSK9	JTB	IFRD2	HEXIM2	EPS8	KCNRG		PRSS12
	INTS9	PCDHA8	CMTM2	PDCD1LG2	JUND	IFT27	HEY1	EPSTI1	KCNS1		PRSS16
	IP6K1	PCDHAC2	CMTM4	PDCD1	JUP	IFT46	HEYL	ERBB3	KCNS3		PRSS50
	IP6K2	PCDHB15	CMTM5	PDE1A	KANK3	IGDCC3	HGFAC	ERCC1	KCNV2		PRTG
	IPO13	PCDHGA3	CMYA5	PDE2A	KARS	IGDCC4	HGS	ERCC2	KCTD14		PSAT1
	IQSEC2	PCDHGA7	CN5H6.4	PDE3A	KAT2A	IGF2AS	HHEX	ERGIC1	KDM1B		PSCA
	IRAK1	PCDP1	CNDP1	PDE3B	KATNB1	IGF2BP1	HHIPL2	ERGIC3	KEL		PSD3
	IRAK2	PCK1	CNGA1	PDE4C	KCNA5	IGFALS	HIGD1B	ERH	KIAA0040		PSD
	IRF2BP1	PCNX	CNGA3	PDE4D	KCNB2	IGFBPL1	HIGD2A	ERLEC1	KIAA0101		PSMA6
	IRF2	PCOLCE2	CNGA4	PDE8B	KCNJ8	IGFN1	HINFP	ERN2	KIAA0114		PSORS1C1
	IRF3	PCSK1	CNIH2	PDGFB	KCNK3	IGHMBP2	HINT1	ERO1L	KIAA0182		PSORS1C2
	IRF5	PCSK2	CNIH3	PDGFD	KCNK7	IGLON5	HINT2	ERP27	KIAA0284		PTCH1
	IRX1	PDE1B	CNKSR2	PDGFRB	KCNMB4	IGSF22	HIP1R	ERP29	KIAA0319		PTCHD2
	IRX2	PDE1C	CNKSR3	PDK4	KCNN4	IGSF8	HIRA	ERRFI1	KIAA0649		PTGFR
	IRX3	PDE2A	CNNM1	PDLIM1	KCNT1	IGSF9	HIRIP3	ESAM	KIAA0664		PTGIR
	IRX4	PDE3A	CNNM2	PDLIM3	KCTD13	IKBKG	HIST1H1C	ESD	KIAA0895		PTGIS
	IRX6	PDE4C	CNNM4	PDLIM4	KCTD14	IL11RA	HIST1H1T	ESRP2	KIAA1161		PTH1R
	ISL2	PDE4D	CNOT6L	PDLIM7	KCTD17	IL17D	HIST1H2AC	ESRRA	KIAA1211		PTK6
	ISOC1	PDE7B	CNR1	PDPN	KDELR1	IL17RC	HIST1H2BD	ESRRB	KIAA1244		PTPDC1
	ISOC2	PDGFA	CNRIP1	PDZD4	KDELR2	IL22RA1	HIST1H2BJ	ESYT1	KIAA1257		PTPLAD2
	ISYNA1	PDK1	CNST	PEAR1	KEAP1	IL32	HIST1H2BK	ETF1	KIAA1324		PTPRD
	ITFG3	PDK4	CNTD1	PEBP4	KHDC1	IL4I1	HIST1H3E	ETFA	KIAA1522		PTPRH
	ITGA2B	PDLIM1	CNTF	PECAM1	KHK	ILVBL	HIST1H3H	ETFB	KIAA1543		PTPRQ
	ITGA3	PDPN	CNTLN	PENK	KIAA0101	IMP4	HIST1H4H	ETHE1	KIAA1549		PTPRR
	ITGA5	PDZD4	CNTN1	PGBD5	KIAA0114	IMPDH1	HIST1H4I	ETNK2	KIAA1598		PTPRU
	ITGAE	PECAM1	CNTN2	PGLYRP1	KIAA0174	IMPDH2	HIST2H2AA3	ETS2	KIAA1751		PTPRVP
	ITGB1BP1	PELI1	CNTN3	PGM5	KIAA0652	INCENP	HIST2H2BA	ETV2	KIAA1804		PTX3
	ITIH4	PENK	CNTN4	PGR	KIAA0664	INF2	HIST2H2BE	ETV3L	KIAA1875		PTX4
	ITM2C	PER1	CNTN6	PHACTR1	KIAA1257	ING4	HIST2H2BF	ETV4	KIAA1958		PVT1
	ITPA	PFKFB3	CNTNAP1	PHACTR3	KIAA1522	ING5	HIST2H3D	EVPLL	KIAA1984		PXT1
	ITPKA	PFKFB4	CNTNAP2	PHLDA3	KIAA1543	INGX	HIST2H4A	EXO1	KIAA2022		PYROXD2
	ITPKC	PFKP	CNTNAP3	PHLDB1	KIAA1751	INHA	HIST3H2A	EXOC2	KIF11		RAB40A
	IVD	PGAM1	COBL	PHLDB2	KIAA2013	INHBB	HJURP	EXOG	KIF12		RAET1K
	JDP2	PGLYRP1	COG5	PHOSPHO1	KIF12	INO80B	HK1	EXOSC1	KIF14		RAI2
	JMJD4	PGM5	COL10A1	PHYHD1	KIF17	INO80E	HK2	EXOSC5	KIF15		RALGAPA1
	JMJD6	PGS1	COL11A1	PHYHIPL	KIF18B	INPP5E	HLA-C	EXOSC8	KIF18A		RAP1GAP2
	JMJD7-PLA2G4B	PHACTR1	COL11A2	PHYHIP	KIF20A	INPPL1	HLA-DPB2	EZR	KIF18B		RAPGEF3
	JMJD8	PHACTR3	COL12A1	PI16	KIF22	INSC	HLA-DQA2	F12	KIF19		RAPGEFL1
	JOSD2	PHC2	COL19A1	PID1	KIF25	INSIG2	HLA-DQB2	F13A1	KIF1A		RARRES1
	JPH3	PHF21B	COL21A1	PIK3CG	KIF2C	INSRR	HLA-DRB6	F2R	KIF1C		RARRES2
	JRKL	PHLDA1	COL22A1	PIK3R5	KIFC1	INTS1	HLA-H	F3	KIF20A		RASA4P
	JTB	PHOSPHO1	COL23A1	PIK3R6	KIFC2	INTS3	HLX	F8	KIF21A		RASAL1
	KARS	PHYHIPL	COL24A1	PIM1	KIFC3	INTS5	HMBS	FABP4	KIF22		RASL11B
	KAT2A	PHYHIP	COL25A1	PKD1L2	KISS1R	IP6K3	HMG20B	FABP5	KIF23		RB1CC1
	KAT5	PI15	COL27A1	PKD2	KLC3	IPO13	HMGB2	FADS2	KIF24		RBM44
	KATNB1	PI3	COL2A1	PKDCC	KLC4	IPO4	HMGB3	FADS3	KIF2C		RCCD1
	KBTBD11	PID1	COL3A1	PKHD1L1	KLF15	IQGAP3	HMGN2	FAF1	KIF4A		RCOR2
	KBTBD3	PIGA	COL4A3BP	PKN3	KLF16	IQSEC2	HMGN4	FAHD1	KIF4B		RDM1
	KCNB2	PIK3AP1	COL4A3	PKNOX2	KLF17	IRF2BP1	HMMR	FAHD2A	KIF6		RECK
	KCND1	PIK3C2G	COL4A4	PLA2G2A	KLF1	IRF3	HMOX2	FAIM3	KIF9		RELN
	KCND3	PIK3R5	COL4A5	PLA2G4C	KLHDC2	IRX6	HMP19	FAM100B	KIFC1		REN
	KCNE1	PIM1	COL4A6	PLA2G5	KLHDC3	ISG15	HN1L	FAM103A1	KIR2DL4		RFX8
	KCNH2	PIM2	COL5A1	PLA2G7	KLHDC8B	ISM2	HN1	FAM104B	KISS1		RGL3
	KCNIP3	PIM3	COL5A2	PLAC1	KLHDC9	ISOC2	HNRNPAB	FAM107B	KITLG		RGPD5
	KCNJ11	PION	COL6A3	PLAC8	KLHL17	ISYNA1	HNRNPC	FAM10A4	KLB		RGS13
	KCNK17	PIP5K1B	COL6A4P2	PLAC9	KLHL21	ITFG3	HOMER3	FAM110B	KLC2		RGS7BP
	KCNK7	PIP5K1P1	COL6A6	PLAT	KLHL25	ITGA10	HOPX	FAM114A1	KLC3		RGS9BP
	KCNK9	PITPNB	COL8A1	PLAUR	KLHL35	ITGA11	HOXB13	FAM114A2	KLF16		RGS9
	KCNN1	PITPNC1	COL8A2	PLAU	KLRG2	ITGA2B	HOXB2	FAM118B	KLF17		RHBDL1
	KCNN4	PKD2L2	COL9A1	PLBD1	KL	ITGA7	HOXB3	FAM119B	KLF2		RHD
	KCNQ1	PKHD1L1	COLEC10	PLCB2	KNDC1	ITGAE	HOXB5	FAM127A	KLF5		RHOXF1
	KCNQ3	PKLR	COLEC11	PLCL2	KPNA2	ITGAX	HOXB6	FAM127B	KLHDC7A		RIC3
	KCTD11	PKN3	COLEC12	PLCXD3	KPTN	ITGB1BP2	HOXB7	FAM127C	KLHDC7B		RIMKLA
	KCTD13	PKNOX2	COLQ	PLD5	KREMEN2	ITGB5	HOXB8	FAM128B	KLHDC9		RINL
	KCTD17	PKP1	COMP	PLEKHG2	KRT10	ITIH5L	HOXC11	FAM133B	KLHL23		RIOK3
	KCTD5	PLA1A	CORIN	PLEK	KRT13	ITM2C	HOXC12	FAM13C	KLHL32		RLTPR
	KCTD6	PLA2G2A	CORO1A	PLIN2	KRT14	ITPA	HOXC13	FAM149A	KLHL35		RNASE2
	KDELC1	PLAC1	CORO2A	PLK3	KRT16	ITPKC	HOXC4	FAM153A	KLHL38		RNF113B
	KDELR1	PLAC8	CORO2B	PLK5P	KRT17	JAG2	HOXC5	FAM153B	KLK10		RNF125
	KDM5C	PLAG1	CORT	PLLP	KRT18	JAKMIP2	HOXD1	FAM155B	KLK11		RNF144A
	KEAP1	PLAUR	COX19	PLP1	KRT5	JAM2	HPCAL1	FAM160B1	KLK6		RNF150
	KHDC1	PLB1	COX4I2	PLTP	KRT6A	JDP2	HPCA	FAM162A	KLK7		RNF165
	KHDRBS3	PLCB1	COX6B2	PLVAP	KRT6B	JMJD4	HPD	FAM162B	KLRG2		RNF183
	KIAA0090	PLCB4	CP110	PLXDC1	KRT6C	JMJD7-PLA2G4B	HPN	FAM164C	KMO		RNF212
	KIAA0101	PLCG2	CPAMD8	PLXNA2	KRT79	JOSD2	HPS1	FAM166B	KNDC1		RNMT
	KIAA0114	PLCXD3	CPB2	PLXNA4	KRT8	JPH1	HPS3	FAM167A	KPNA2		ROPN1B
	KIAA0174	PLD5	CPD	PLXNC1	KRTAP5-8	JPH2	HPS6	FAM171A1	KPNA7		ROPN1
	KIAA0195	PLEKHG1	CPEB1	PNMT	KRTCAP2	JRK	HPX	FAM171B	KREMEN2		ROS1
	KIAA0649	PLEKHG2	CPEB3	PNPLA3	KRTCAP3	JSRP1	HRASLS2	FAM177B	KRT13		RPL13
	KIAA1191	PLEKHG7	CPEB4	PODN	LAD1	JTB	HRAS	FAM183A	KRT15		RPL21P44
	KIAA1199	PLEK	CPLX1	POM121L4P	LAGE3	JUB	HRC	FAM189A2	KRT16		RPL21
	KIAA1522	PLIN2	CPLX2	POM121L9P	LAMA3	KANK2	HRH3	FAM195B	KRT17		RPL7
	KIAA1530	PLIN4	CPLX3	POPDC3	LAMB2L	KAT2A	HRSP12	FAM19A2	KRT18		RPLP0P2
	KIAA1543	PLK3	CPN2	POSTN	LAMC3	KATNB1	HR	FAM21A	KRT19		RPRML
	KIAA1967	PLOD2	CPNE4	POU2AF1	LAPTM4A	KAZALD1	HS1BP3	FAM24B	KRT1		RPS10P7
	KIAA1984	PLSCR1	CPNE5	PPAP2B	LARP6	KBTBD10	HS6ST1	FAM26F	KRT23		RPS15AP10
	KIAA2013	PLTP	CPNE7	PPAPDC3	LASS1	KCNAB2	HS6ST3	FAM35B	KRT4		RPS20
	KIF12	PLVAP	CPNE8	PPARG	LASS4	KCNAB3	HSBP1L1	FAM36A	KRT5		RPS26P11
	KIF18B	PLXNA4	CPNE9	PPBP	LCMT1	KCND1	HSBP1	FAM3A	KRT6A		RPS3
	KIF1C	PM20D2	CPO	PPP1R14A	LCN10	KCNH2	HSCB	FAM3B	KRT6B		RPS6KL1
	KIF20A	PMAIP1	CPPED1	PPP1R15A	LCN12	KCNH3	HSD11B1L	FAM3C	KRT7		RRN3P2
	KIF22	PNMT	CPT1C	PPP1R16B	LCN2	KCNIP3	HSD11B1	FAM3D	KRT80		RRP7B
	KIF2C	PNOC	CPVL	PPP1R1C	LDB2	KCNJ11	HSD17B10	FAM45A	KRT81		RSPO1
	KIF9	PNPLA1	CP	PRAM1	LDB3	KCNJ12	HSD17B14	FAM45B	KRT86		RSPO2
	KIFC2	PNPLA8	CR1L	PRDM16	LDHA	KCNK4	HSD17B6	FAM48A	KRT8		RSPO3
	KLC2	PNP	CR1	PRDM1	LDHB	KCNK5	HSD17B7P2	FAM49A	KRTAP5-1		RSPO4
	KLC3	PNRC1	CR2	PRDM6	LDHC	KCNMB4	HSD3B7	FAM50A	KRTAP5-7		RTBDN
	KLC4	POF1B	CRABP1	PRDM8	LDHD	KCNN1	HSF1	FAM50B	KRTCAP3		RTEL1
	KLF15	POM121L10P	CRB1	PREX1	LDOC1	KCNQ4	HSF4	FAM5C	KYNU		RTKN2
	KLF16	POM121L1P	CRB2	PREX2	LEMD1	KCP	HSFX2	FAM60A	L1CAM		RTN4RL1
	KLHDC3	POM121L4P	CREB1	PRF1	LENG9	KCTD13	HSH2D	FAM64A	L3MBTL4		RUNDC2C
	KLHDC8B	POM121L8P	CREB5	PRG2	LEPRE1	KCTD19	HSP90AA1	FAM65A	LAD1		RUNX1T1
	KLHDC9	POM121L9P	CREBBP	PRG4	LEPREL2	KCTD2	HSP90AB1	FAM66A	LAGE3		RUNX2
	KLHL21	PON1	CREG2	PRKCB	LEPR	KDELR1	HSP90B1	FAM66D	LAMA5		RYR1
	KLHL22	POU2AF1	CRHBP	PRKCDBP	LETMD1	KDM4B	HSPA1A	FAM70B	LAMB3		RYR2
	KLHL38	PPARD	CRHR1	PRKCQ	LGALS12	KDM5C	HSPA1B	FAM71D	LAMC2		S100A14
	KLK10	PPARGC1A	CRIM1	PRKD1	LGALS1	KDM6B	HSPA1L	FAM78B	LAMC3		S100A2
	KLK14	PPARG	CRIP3	PRKG1	LGI3	KEAP1	HSPA2	FAM83B	LAMP3		S100A7
	KLK6	PPBP	CRISPLD2	PRND	LGI4	KHK	HSPA5	FAM83E	LANCL3		S100P
	KLK7	PPEF2	CRK	PRO0611	LGTN	KHSRP	HSPA6	FAM86A	LAPTM4B		S1PR5
	KPTN	PPP1R14A	CRMP1	PRO0628	LHPP	KIAA0090	HSPA8	FAM86B2	LAPTM5		SALL4
	KRI1	PPP1R15A	CROCCL1	PROCR	LHX6	KIAA0101	HSPA9	FAM89B	LASS2		SAMD11
	KRT10	PPP1R1C	CROCCL2	PROK2	LIAS	KIAA0114	HSPB1	FAM90A1	LASS3		SARDH
	KRT15	PPP1R2P1	CROCC	PROS1	LIFR	KIAA0141	HSPB2	FAM92B	LASS4		SBSN
	KRT16	PPP1R3B	CRP	PRR16	LILRA3	KIAA0174	HSPB8	FAM96B	LBP		SCARA5
	KRT18	PRAM1	CRTAC1	PRR7	LIME1	KIAA0195	HSPB9	FAM98C	LCN12		SCARF2
	KRT19	PRAME	CRTAM	PRRT4	LIMS2	KIAA0284	HSPBP1	FANCA	LCN2		SCARNA17
	KRT23	PRDM16	CRTC1	PRRX1	LIN37	KIAA0415	HSPC157	FANCF	LCNL1		SCARNA2
	KRT7	PRDM8	CRY2	PRSS35	LIN7B	KIAA0664P3	HSPD1	FANCG	LCP1		SCARNA5
	KRT86	PREX2	CRYBB1	PRSS36	LINGO1	KIAA0664	HSPE1	FANCI	LDHC		SCARNA6
	KRT8	PRG2	CRYBB2	PRX	LITAF	KIAA0892	HSPH1	FAR2	LDLR		SCARNA9L
	KRTAP5-1	PRG4	CRYBB3	PSMB9	LLGL2	KIAA0895L	HTATIP2	FARSA	LDOC1		SCD
	KRTAP5-8	PRKCB	CRYBG3	PSTPIP1	LMAN2L	KIAA0913	HTR1B	FARSB	LEKR1		SCFD1
	KRTAP5-9	PROCR	CRYGN	PTCHD2	LMF2	KIAA1045	HTRA2	FASN	LEMD1		SCGB3A1
	KRTCAP2	PROK1	CRYGS	PTCRA	LMNA	KIAA1274	HTRA3	FASTKD3	LENEP		SCN3B
	KRTCAP3	PROK2	CRYM	PTGDR	LMNB2	KIAA1984	HYAL3	FASTK	LGALS12		SCN4A
	L1CAM	PROX1	CSDAP1	PTGDS	LMOD1	KIAA2013	HYI	FAU	LGALS8		SCN7A
	LAGE3	PRR18	CSDC2	PTGER1	LOC100128822	KIF11	HYLS1	FBF1	LGALS9C		SCN9A
	LAMB2	PRRG1	CSF1	PTGER2	LOC100130776	KIF14	HYOU1	FBLL1	LGR6		SCRN1
	LAMB4	PRSS16	CSF2RA	PTGER4	LOC100131691	KIF15	IAH1	FBLN1	LGSN		SCRT1
	LAMC3	PRSS3	CSF2RB	PTGIR	LOC100132247	KIF17	IARS2	FBLN2	LHFPL1		SCTR
	LAMP2	PRSS50	CSF3R	PTGIS	LOC100132354	KIF18A	IBSP	FBLN5	LHFPL5		SCUBE1
	LAP3	PRUNE2	CSGALNACT1	PTGS2	LOC100133957	KIF18B	ICAM3	FBL	LHX2		SCUBE2
	LAPTM4A	PSAT1	CSGALNACT2	PTH1R	LOC100134868	KIF1A	ICAM4	FBXL8	LIF		SCXB
	LARP1	PSTPIP1	CSMD1	PTHLH	LOC100216001	KIF20A	ICT1	FBXO16	LILRA5		SDHAP3
	LARP6	PSTPIP2	CSMD2	PTPLAD2	LOC100270710	KIF22	ID1	FBXO17	LILRB3		SDK2
	LARS2	PTENP1	CSMD3	PTPN5	LOC100271831	KIF23	ID2	FBXO18	LILRB4		SDR16C5
	LASS1	PTGDS	CSNK1A1L	PTPN7	LOC100288778	KIF25	ID3	FBXO21	LIMD1		SEC14L4
	LASS4	PTGER1	CSNK1A1P	PTPRB	LOC113230	KIF26A	IDH3B	FBXO25	LIME1		SEMA3D
	LAT	PTGES	CSNK1G1	PTPRCAP	LOC143666	KIF2C	IDH3G	FBXO27	LIN28A		SEMA4B
	LAYN	PTGIR	CSNK1G3	PTPRC	LOC147727	KIF4A	IDUA	FBXO32	LINGO4		SEMA5B
	LBXCOR1	PTGS2	CSPG4	PTPRM	LOC150776	KIF4B	IER3IP1	FBXO39	LIPG		SEMA6C
	LCK	PTK2B	CSPG5	PTPRN2	LOC158572	KIFC1	IER3	FBXO4	LIPH		2018-09-05
	LCMT1	PTP4A1	CSRNP1	PTPRO	LOC25845	KIFC2	IER5L	FBXO6	LITAF		SEPT7L
	LCN12	PTP4A3	CSRNP3	PTPRQ	LOC339535	KIFC3	IER5	FBXO7	LLGL2		SERHL2
	LCN2	PTPLA	CST7	PTX3	LOC339674	KIR2DL4	IFI27L1	FBXO8	LMAN1L		SERINC4
	LDHA	PTPN12	CSTF2T	PTX4	LOC388588	KIRREL2	IFI27L2	FBXW10	LMNB1		SERINC5
	LDHB	PTPN2	CTAGE1	PYHIN1	LOC388789	KISS1R	IFI35	FCAR	LMNB2		SERPINA1
	LDHD	PTPRC	CTAGE4	PZP	LOC389458	KISS1	IFITM1	FCGR3B	LMO1		SERPIND1
	LDLRAP1	PTPRE	CTAGE6	QPRT	LOC399744	KLC2	IFITM2	FCGRT	LMO3		SERPINF1
	LDOC1	PTPRN	CTAGE9	RAB11FIP4	LOC400752	KLC3	IFITM3	FCN1	LMO7		SERPINF2
	LEAP2	PTPRQ	CTCFL	RAB20	LOC400891	KLC4	IFNGR2	FCN2	LMOD3		SEZ6L2
	LEMD1	PTPRVP	CTDP1	RAB33A	LOC401052	KLF1	IFRD2	FCN3	LMTK2		SFRP2
	LENG1	PTPRZ1	CTDSP2	RAB37	LOC401397	KLHDC2	IFT140	FCRL2	LMTK3		SFRP4
	LENG8	PTTG2	CTDSPL2	RAB39B	LOC440356	KLHDC3	IFT20	FCRL6	LMX1B		SFTA1P
	LENG9	PTTG3P	CTF1	RAB3C	LOC643387	KLHDC9	IGBP1	FCRLB	LNX2		SFTPA2
	LEPRE1	PTX3	CTLA4	RAB3IL1	LOC643719	KLHL17	IGDCC3	FDFT1	LOC100127888		SFTPB
	LEPREL2	PUS7	CTNNA3	RAB41	LOC644165	KLHL22	IGFBP2	FDPS	LOC100128675		SFTPD
	LETM1	PVR	CTNNAL1	RAI2	LOC644538	KLHL26	IGFBP4	FDX1L	LOC100130148		SGCA
	LGALS1	PZP	CTNND2	RAMP1	LOC653566	KLHL30	IGFBP7	FECH	LOC100130933		SGCD
	LGALS3	QPCT	CTRL	RAMP2	LOC728606	KLHL31	IGHMBP2	FERMT2	LOC100132724		SGCG
	LGI3	QSOX1	CTSE	RAMP3	LOC728855	KLHL35	IGLON5	FES	LOC100132832		SGIP1
	LHPP	QSOX2	CTSH	RARRES2	LOC728875	KLHL4	IGSF1	FEZ1	LOC100133161		SGK2
	LHX2	RAB24	CTSS	RARRES3	LOC81691	KLK14	IGSF8	FFAR3	LOC100133991		SGOL1
	LIAS	RAB27A	CTSW	RASA3	LPAR2	KLK1	IGSF9	FGF13	LOC100144603		SGSM1
	LILRA3	RAB33A	CTTNBP2NL	RASAL3	LPCAT1	KLK4	IKBKE	FGF14	LOC100144604		SH2D6
	LILRA5	RAB3C	CTTNBP2	RASGRP2	LPCAT3	KLRC2	IK	FGF17	LOC100289341		SH3PXD2A
	LIN37	RAB8B	CTU1	RASGRP4	LPCAT4	KPNA2	IL11	FGF7	LOC113230		SH3PXD2B
	LIN7A	RAB9B	CUBN	RASL10B	LPHN1	KPTN	IL17RC	FGFBP2	LOC121838		SH3RF3
	LIN7B	RABGEF1	CUX1	RASL11A	LPIN3	KRBA1	IL17REL	FGFR1OP2	LOC127841		SHANK1
	LIPE	RAC2	CUX2	RASL12	LPPR3	KREMEN2	IL17RE	FGFR4	LOC143666		SHC3
	LLGL1	RAD51	CUZD1	RASSF10	LRCH4	KRI1	IL8	FGL1	LOC145837		SHF
	LLGL2	RAET1L	CWF19L2	RASSF5	LRDD	KRTCAP2	ILDR1	FHL1	LOC148696		SHISA3
	LMAN2L	RALGAPA2	CX3CR1	RBM11	LRFN4	KSR1	ILKAP	FHOD1	LOC148709		SHMT2
	LMAN2	RALGDS	CXADRP2	RBM24	LRG1	KY	ILK	FH	LOC150381		SHROOM1
	LMBRD1	RAMP3	CXADRP3	RBP5	LRRC10B	LAGE3	ILVBL	FIBP	LOC150622		SIAH3
	LMNA	RAP1GAP2	CXCL12	RBPMS2	LRRC14	LAMA5	IMP4	FIGF	LOC157381		SIGLEC11
	LMNB2	RAPGEF3	CXCL3	REEP1	LRRC20	LAMB1	IMPA2	FIS1	LOC254559		SIGLECP3
	LMO2	RAPGEF4	CXCL5	RELL2	LRRC23	LANCL3	IMPDH1	FITM1	LOC284009		SIP1
	LMTK3	RAPGEF5	CXCL6	RELT	LRRC24	LAPTM4A	INA	FKBP1A	LOC284578		SIX3
	LNX1	RARRES1	CXCR1	REM1	LRRC26	LAPTM4B	INF2	FKBP2	LOC286467		SKAP1
	LOC100130776	RASAL3	CXCR2P1	RENBP	LRRC29	LAS1L	ING1	FKBP3	LOC338651		SLAMF9
	LOC100133545	RASD1	CXCR2	REN	LRRC32	LASS1	ING2	FKBP4	LOC339674		SLC11A1
	LOC100134229	RASD2	CXCR3	RET	LRRC41	LAT	ING4	FKBP5	LOC344967		SLC13A2
	LOC100268168	RASGRF1	CXCR4	RFTN1	LRRC42	LBH	INHBE	FKBP7	LOC388152		SLC13A3
	LOC100288778	RASGRP2	CXCR5	RFX2	LRRC45	LBX2	INPP5E	FKBP8	LOC388588		SLC14A2
	LOC100289341	RASGRP3	CXCR6	RFX8	LRRC47	LBXCOR1	INPP5J	FKBP9	LOC389333		SLC16A10
	LOC121838	RASGRP4	CXCR7	RGL4	LRRC56	LCMT1	INPPL1	FLII	LOC389458		SLC16A11
	LOC152217	RASIP1	CXXC4	RGN	LRSAM1	LCNL1	INSM1	FLJ10661	LOC389493		SLC16A3
	LOC158572	RASL10B	CXorf21	RGS11	LSM14B	LCTL	INTS1	FLJ11235	LOC389634		SLC16A5
	LOC202781	RASSF2	CXorf23	RGS13	LSM2	LDB3	INTS8	FLJ36777	LOC399815		SLC16A8
	LOC220729	RASSF5	CXorf30	RGS16	LSM4	LEMD2	INTS9	FLJ42875	LOC400696		SLC17A7
	LOC26102	RASSF6	CXorf36	RGS18	LSM7	LENG8	IP6K3	FLOT1	LOC400891		SLC18A2
	LOC283070	RBM20	CXorf38	RGS1	LSS	LENG9	IPO13	FLRT3	LOC401052		SLC19A3
	LOC284023	RBMS1	CXorf42	RGS2	LTBP4	LEPRE1	IQCE	FLT3LG	LOC440356		SLC1A6
	LOC285359	RBMS3	CXorf50B	RGS3	LTC4S	LEPREL1	IQGAP3	FLT4	LOC440905		SLC1A7
	LOC339047	RBP4	CXorf57	RGS4	LY6D	LEPREL2	IQSEC2	FLYWCH2	LOC441294		SLC22A11
	LOC341056	RBP7	CYB561D1	RGS5	LY6E	LETMD1	IRAK1	FMO2	LOC441455		SLC22A18AS
	LOC388588	RCAN1	CYB5R4	RGS7BP	LY6G5C	LFNG	IRF2BP1	FMO3	LOC541473		SLC22A18
	LOC388955	RDM1	CYB5RL	RHBDL3	LY6G6C	LGALS1	IRF2BP2	FMO6P	LOC642587		SLC22A20
	LOC400043	RELB	CYBB	RHOBTB2	LY6H	LGI3	IRF3	FMOD	LOC643008		SLC22A3
	LOC401127	RELL1	CYBRD1	RHOB	LY96	LGI4	IRF5	FN1	LOC644165		SLC23A3
	LOC401463	RELN	CYLD	RHOH	LYAR	LHB	IRF7	FN3KRP	LOC645676		SLC24A1
	LOC407835	RELT	CYP11A1	RHOJ	LYG1	LHPP	IRF9	FNDC3A	LOC645752		SLC25A27
	LOC440356	REL	CYP17A1	RICH2	LYNX1	LHX2	ISCA2	FNDC4	LOC646851		SLC25A29
	LOC440957	REN	CYP19A1	RIMBP2	LYPD3	LIG1	ISG15	FNDC5	LOC647946		SLC25A2
	LOC550643	RFPL3S	CYP1A1	RIMS4	LYPLA2	LILRA2	ISL2	FNDC8	LOC723972		SLC26A10
	LOC643387	RGL4	CYP20A1	RIN3	LYSMD2	LIMD2	ISLR2	FNTA	LOC728606		SLC26A4
	LOC644165	RGS18	CYP21A2	RLTPR	LYVE1	LIME1	ISOC1	FNTB	LOC728875		SLC26A5
	LOC644538	RGS2	CYP26A1	RNASE2	MACROD1	LIMS2	ISOC2	FOLH1	LOC731789		SLC26A7
	LOC653566	RGS7BP	CYP27A1	RNASE6	MAD2L2	LIN37	ISYNA1	FOLR1	LOC80054		SLC26A9
	LOC728554	RHBDF2	CYP27C1	RND1	MADCAM1	LIN7B	ITFG3	FOLR2	LOC80154		SLC28A1
	LOC728643	RHCG	CYP2A6	RNF122	MAF1	LINGO1	ITGA2B	FOLR3	LOC90110		SLC28A3
	LOC728743	RHD	CYP2A7	ROBO2	MAFF	LLGL1	ITGA3	FOXC2	LOC90246		SLC2A10
	LOC728875	RHOH	CYP2B7P1	ROBO4	MAFG	LMAN2	ITGA7	FOXF1	LOC91149		SLC2A11
	LOC729678	RHOJ	CYP2C18	ROPN1L	MAGED1	LMBR1L	ITGAE	FOXF2	LOC92249		SLC2A14
	LOC729991-MEF2B	RHOQ	CYP2C8	ROS1	MAGED2	LMF2	ITGB1BP1	FOXL1	LOH12CR1		SLC2A1
	LOC80054	RHOU	CYP2E1	RP1L1	MAGIX	LMNA	ITGB5	FOXP3	LONRF3		SLC2A3
	LOC84856	RIC3	CYP2J2	RP1	MALL	LMNB2	ITM2C	FPGS	LPAR3		SLC2A4
	LOC90246	RICH2	CYP2S1	RPGR	MAL	LMO7	ITPA	FPR1	LPCAT1		SLC2A5
	LOC92659	RILPL2	CYP2U1	RPL23AP53	MAMDC2	LMOD3	ITPK1	FPR2	LPCAT3		SLC34A2
	LOC93622	RIMS2	CYP2W1	RPS6KA2	MAMSTR	LOC100128239	ITPKA	FRAS1	LPL		SLC34A3
	LOH12CR2	RIOK3	CYP3A43	RRAD	MAN2C1	LOC100129066	IVD	FRAT1	LPO		SLC35E2
	LONP1	RLF	CYP3A4	RRAS	MANBAL	LOC100130015	IZUMO1	FRG1B	LPPR1		SLC38A4
	LOXL4	RLIM	CYP3A5	RS1	MAOA	LOC100130331	JAG2	FRG1	LPPR3		SLC38A5
	LPCAT4	RNASE2	CYP3A7	RSPO1	MAOB	LOC100130776	JAGN1	FRMD4B	LRAT		SLC39A5
	LPHN1	RND1	CYP46A1	RSPO3	MAP1LC3A	LOC100130987	JAKMIP2	FRMD8	LRBA		SLC3A1
	LPIN1	RNF122	CYP4A11	RSPO4	MAP1LC3B2	LOC100132287	JMJD6	FRZB	LRCH4		SLC41A1
	LPIN3	RNF128	CYP4B1	RTL1	MAP2K1	LOC100132288	JMJD8	FSD1	LRFN1		SLC43A1
	LPL	RNF133	CYP4F11	RTN1	MAP2K2	LOC100133161	JOSD2	FSIP1	LRG1		SLC44A5
	LPPR2	RNF138P1	CYP4F12	RUNDC3B	MAP2K3	LOC100133545	JSRP1	FST	LRGUK		SLC4A1
	LRCH4	RNF144B	CYP4F22	RUNX3	MAP2K7	LOC100133612	JTB	FTH1	LRIG1		SLC4A9
	LRDD	RNF145	CYP4F3	RXFP1	MAP3K10	LOC100144603	JUP	FTHL3	LRP2		SLC5A10
	LRFN3	RNF148	CYP4V2	RXRG	MAP3K11	LOC100144604	KAT2A	FTL	LRP8		SLC5A1
	LRIG1	RNF149	CYP4X1	S100A12	MAP3K6	LOC100188947	KCNE2	FTSJ1	LRRC16B		SLC5A3
	LRP5	RNF175	CYP4Z1	S100A3	MAP4K2	LOC100240734	KCNE4	FTSJ2	LRRC23		SLC6A14
	LRPAP1	RNF182	CYP4Z2P	S100A4	MAP6D1	LOC100268168	KCNF1	FTSJ3	LRRC26		SLC6A17
	LRRC23	RNF5P1	CYP7A1	S100A8	MAPK11	LOC100271831	KCNG1	FUCA1	LRRC36		SLC6A20
	LRRC24	ROBO4	CYP8B1	S100A9	MAPK12	LOC100288778	KCNG3	FUK	LRRC45		SLC6A3
	LRRC25	ROPN1B	CYS1	S100P	MAPK13	LOC113230	KCNH2	FUNDC1	LRRC46		SLC6A6
	LRRC42	ROS1	CYSLTR1	S1PR1	MAPK15	LOC143666	KCNH3	FUNDC2P2	LRRC4B		SLC7A10
	LRRC45	RPA4	CYSLTR2	S1PR4	MAPK3	LOC144486	KCNJ11	FUNDC2	LRRC50		SLC7A5
	LRRC8A	RPGR	CYTH4	S1PR5	MAPK8IP2	LOC147727	KCNJ12	FUS	LRRC56		SLC8A3
	LRRFIP2	RPH3A	CYTIP	SAMD11	MAPKAPK2	LOC150776	KCNJ8	FUT3	LRRC59		SLC9A3
	LRSAM1	RPL13AP6	CYTL1	SAMD14	MAPT	LOC151534	KCNK13	FUZ	LRRC6		SLC9A5
	LSG1	RPL19P12	CYTSA	SAMD3	2018-03-10	LOC256880	KCNK15	FXR2	LRRC8B		SLC9A7
	LSM10	RPL22L1	CYYR1	SAMSN1	MARCKSL1	LOC26102	KCNK1	FXYD1	LRRC8D		SLCO4A1
	LSM12	RPL23P8	D4S234E	SARDH	MARCO	LOC282997	KCNK6	FXYD3	LRRC8E		SLCO4C1
	LSM1	RPRM	DAAM2	SARM1	MARVELD1	LOC284023	KCNK7	FXYD5	LRRIQ1		SLED1
	LSM3	RPS6KA3	DAB1	SASH3	MASP1	LOC284440	KCNN2	FXYD6	LRRIQ3		SLIT2
	LSM4	RRAGD	DACH1	SCARA3	MAST1	LOC286467	KCNQ1	FXYD7	LRRK2		SLITRK4
	LSM6	RRN3P2	DACH2	SCARA5	MAZ	LOC338799	KCNS3	FYTTD1	LRRN4		SLMO1
	LSM7	RSPH10B2	DACT1	SCARF1	MBD3	LOC339047	KCTD13	FZD6	LRTM2		SLN
	LSMD1	RSPO2	DACT2	SCARF2	MBOAT7	LOC339535	KCTD15	FZD9	LRWD1		SLPI
	LSR	RSPO3	DACT3	SCARNA2	MCAM	LOC339674	KCTD17	G3BP1	LSM14B		SMC1B
	LSS	RSPO4	DAGLA	SCARNA9L	MCM2	LOC349114	KCTD2	G3BP2	LSM4		SMPD3
	LTBP1	RTDR1	DAND5	SCGB3A1	MCM6	LOC374491	KCTD5	G6PD	LSR		SMTNL2
	LTBP4	RUNDC3B	DAPK1	SCHIP1	MCRS1	LOC388152	KCTD6	GAA	LST1		SNCAIP
	LTBR	RXFP1	DAPK2	SCML1	MDGA2	LOC388588	KDELR1	GABARAPL1	LTA4H		SNED1
	LTK	RYR2	DAPP1	SCML4	MDH1	LOC388955	KDM2A	GABARAPL2	LTA		SNORA31
	LY6E	S100A12	DARC	SCN1A	MDK	LOC389333	KDM5B	GABARAP	LTB		SNORA72
	LY6G5C	S100A2	DBC1	SCN1B	MED10	LOC389458	KDR	GABRA2	LTF		SNORA76
	LY86	S100A3	DBF4B	SCN2B	MED11	LOC391322	KEAP1	GABRB3	LTK		SNORD116-20
	LY96	S100A7	DBH	SCN3A	MED18	LOC399744	KIAA0101	GADD45A	LY6D		SNORD116-28
	LYAR	S100A8	DBP	SCN3B	MED24	LOC400891	KIAA0195	GADD45B	LY6G6C		SNORD116-4
	LYG1	S100A9	DCAF4L1	SCN7A	MED25	LOC401010	KIAA0284	GADD45GIP1	LY86		SNRPN
	LYPD3	S100B	DCC	SCN9A	MED30	LOC401397	KIAA0415	GADD45G	LYPD3		SNURF
	LYPD6B	S100P	DCDC1	SCTR	MED8	LOC407835	KIAA0649	GAL3ST1	LYPD5		SNX31
	LYPLA2	S1PR1	DCDC2B	SCUBE1	MED9	LOC440461	KIAA0913	GALE	LYPD6B		SNX6
	LYRM4	S1PR3	DCDC2	SCUBE2	MEF2B	LOC440925	KIAA1161	GALK1	LYPLA2		SOD3
	MACROD1	S1PR5	DCHS1	SCXB	MEFV	LOC440957	KIAA1257	GALM	LYZ		SPAG4
	MAD2L1BP	SAA1	DCHS2	SDF2L1	MEN1	LOC442454	KIAA1539	GALNT1	MACC1		SPATA12
	MAD2L1	SAA2	DCLK1	SDK1	MESP1	LOC550643	KIAA1543	GALNT3	MACROD1		SPATA9
	MAD2L2	SAA4	DCLK2	SDPR	MESP2	LOC619207	KIAA1751	GALNT4	MACROD2		SPC24
	MAEA	SAMD5	DCLK3	SDR16C5	METRN	LOC642846	KIAA1875	GALNT5	MAD2L1		SPDYE1
	MAF1	SAMSN1	DCLRE1C	SDS	METT11D1	LOC643008	KIAA1949	GALNT7	MAGEC3		SPDYE2
	MAFF	SAP30	DCN	SELE	METTL11A	LOC643387	KIAA1967	GALNTL2	MAGEE2		SPDYE5
	MAFG	SAT1	DCP1A	SELM	METTL1	LOC646471	KIAA1984	GALNTL4	MAGIX		SPDYE6
	MAGED1	SBNO2	DCP1B	SELPLG	METTL5	LOC647946	KIAA2013	GAL	MAK		SPDYE7P
	MAGED2	SBSN	DCP2	SELP	MFAP1	LOC649330	KIF12	GAMT	MAL2		SPG7
	MAGED4B	SC4MOL	DCST1	SEMA3A	MFAP4	LOC723972	KIF15	GANAB	MAL		SPIN2A
	MAGED4	SCAND3	DCST2	SEMA3B	MFGE8	LOC728643	KIF17	GAPDHS	MAMDC2		SPINK5
	MAGEE1	SCARA5	DCT	SEMA3F	MFSD10	LOC728743	KIF18B	GAPDH	MANEAL		SPIRE1
	MAGEF1	SCARF1	DCUN1D3	SEMA3G	MFSD2A	LOC728855	KIF1C	GAR1	MAP2K3		SPIRE2
	MAGEH1	SCARNA16	DCX	SEMA5A	MFSD2B	LOC728875	KIF20A	GARS	MAP2		SPNS2
	MAGIX	SCEL	DDC	SEMA6B	MFSD3	LOC728989	KIF21A	GAS5	MAP3K13		SPOCK1
	MAGOH	SCG2	DDHD1	SEMA7A	MFSD5	LOC729234	KIF22	GAS6	MAP3K15		SPON1
	MAL2	SCG3	DDI2	2018-09-01	MGAT4B	LOC729991-MEF2B	KIF25	GATA2	MAP3K9		SPON2
	MALL	SCGB2A1	DDIT3	SERPINA10	MGC12982	LOC730101	KIF2C	GATA5	MAP4K2		SQLE
	MAMDC4	SCGB3A1	DDIT4L	SERPINA11	MGC2752	LOC80154	KIF3C	GATA6	MAP7		SRD5A3
	MAML1	SCHIP1	DDN	SERPINA1	MGC70857	LOC81691	KIF4A	GATSL1	MAPK13		SRP54
	MAMLD1	SCML2	DDO	SERPINB2	MGP	LOC84856	KIF4B	GATSL2	MAPK15		SRPK3
	MAN1B1	SCN1A	DDR2	SERPIND1	MGST1	LOC92659	KIF5A	GATSL3	MAPK4		SRPX2
	MAN2C1	SCN3A	DDX11L2	SERPINE1	MGST2	LOH12CR2	KIF6	GBAP1	MAPK8IP2		SRPX
	MANBAL	SCN3B	DDX26B	SERPINF1	MGST3	LONP1	KIFC1	GBAS	MAPKAPK3		SRRM3
	MANBA	SCN5A	DDX43	SERPINF2	MIA	LOXL1	KIFC2	GBA	MAPT		SSPN
	MANF	SCN9A	DDX60L	SERPINH1	MICA	LOXL2	KIRREL2	GBE1	2018-03-10		SSPO
	MAP1LC3A	SCNN1B	DDX60	SERTAD1	MID1IP1	LPAR2	KISS1R	GBP2	2018-03-04		SSTR1
	MAP1LC3B2	SCNN1G	DEDD2	SFMBT2	MIER2	LPCAT1	KLC2	GBP3	MARCKSL1		ST6GALNAC2
	MAP2K1	SCRG1	DEFA1B	SFTA1P	MIF	LPCAT4	KLC3	GBP6	MARCO		ST6GALNAC5
	MAP2K2	SCTR	DENND1A	SFTPA2	MIIP	LPHN1	KLC4	GCAT	MARK2		ST7OT4
	MAP2K3	SCUBE1	DENND1B	SFTPB	MIOX	LPPR1	KLF16	GCA	MARVELD2		ST8SIA2
	MAP3K10	SDC4	DENND1C	SFTPD	MKI67IP	LPPR2	KLHDC3	GCDH	MARVELD3		ST8SIA6
	MAP4K1	SDCBP2	DENND2A	SGCA	MKNK2	LPPR3	KLHDC7B	GCHFR	MAST1		STAB1
	MAP4K2	SDK1	DENND2C	SGCD	MLC1	LRAT	KLHDC8A	GCKR	MAT1A		STAB2
	MAP7D1	SDK2	DENND3	SGCG	MLF1	LRCH4	KLHDC8B	GCN1L1	MATN4		STAT6
	MAP7D2	SDPR	DENND4A	SGIP1	MLF2	LRDD	KLHDC9	GCNT3	MBOAT2		STEAP2
	MAPK12	SDR16C5	DENND4C	SGK1	MLST8	LRFN1	KLHL12	GCOM1	MBOAT7		STEAP4
	MAPK13	SEC14L1	DENND5A	SH2B3	MLX	LRFN3	KLHL17	GCSH	MB		STK31
	MAPK15	SEC14L4	DENND5B	SH2D1A	MMAB	LRFN4	KLHL22	GDF10	MCAT		STK36
	MAPK3	SEH1L	DEPDC6	SH2D2A	MMADHC	LRP3	KLHL30	GDF15	MCCC1		STON1-GTF2A1L
	MAPK7	SEL1L3	DERL3	SH2D3C	MMEL1	LRP4	KLK14	GDF6	MCF2L2		STON1
	MAPK9	SELE	DES	SH3BP5	MMP15	LRPAP1	KLKB1	GDI2	MCM10		STRC
	MAPKAP1	SELL	DET1	SH3D20	MMP23B	LRRC14B	KPNA2	GDPD2	MCM2		STX19
	MAPKAPK2	SELP	DFFB	SH3GL2	MMP28	LRRC14	KPNB1	GEFT	MCM3APAS		STXBP6
	MAPKAPK3	SEMA3A	DGCR10	SH3GL3	MMP8	LRRC15	KPTN	GEMIN5	MCM4		SULF2
	MAPKSP1	SEMA4B	DGCR11	SH3RF3	MMRN1	LRRC16B	KREMEN2	GEMIN7	MCM8		SUMO4
	MAPRE3	SEMA6B	DGCR5	SH3TC1	MMRN2	LRRC17	KRI1	GEM	MCOLN2		SV2B
	2018-03-02	SERPINA3	DGCR9	SHANK1	MMS19	LRRC1	KRT10	GET4	MCOLN3		SVEP1
	2018-03-09	SERPINB1	DGKB	SHC2	MND1	LRRC20	KRT13	GFM1	MDGA2		SYCE1L
	MARCKSL1	SERPINB2	DGKE	SHC3	MOB2	LRRC23	KRT18	GFPT2	MDH1B		SYCP2
[truncated: 6,213 more rows]
