# Supplementary material for: Flura-seq identifies organ-specific metabolic adaptations during early metastatic colonization
Source: eLife journal article supplement (doi:10.7554/elife.43627), 2019-03-25
Supplement: supp [file elife-43627-supp-v1.zip › elife_poa_e43627_Supplementary_File_6.xlsx]

## Sheet: Sheet1
Oligos	Sequence
HB HA CD BstBIF	CAGATC TTCGAA GCC ACC ATG GCC TAC CCA TAC GAT GTT CCA GAT TAC GCT ATG
HB CD XbaI R	ACCTCG TCTAGA CTA CTC ACC AAT ATC TTC AAA CCA ATC CTG
HB RFPBstBIF	ATCCGT TTCGAA CGC CAC CAT GAG CGA GCT GAT CAA G
HB RFPBamHIR	TGA AGT GGA TCC TTA TCT GTG CCC CAG TTT GCT AGG GAG
HB IRES BamHIF	AGTCCA GGATCC GAA GTT ATG GAT CCG CGG CCG CAA ATT C
HB IRES BstBIR	ATCCGT TTCGAA GTA CTC GGT GGC CAT GGT ATT ATC GTG
HB UPRT R1	ACC GCA TGT TAG AAG ACT TCC TCT GCC CTC CAT GGT TCC AAA GTA CCG GTC ACC GAA ATC
HB UPRT R2	CCC GGA AGG GCC GGG ATT CTC CTC CAC GTC ACC GCA TGT TAG AAG ACT TCC TCT GCC CTC
HB UPRT R3	GTG CAT GTT CTC CTT GAT CAG CTC GCT CAT CCC GGA AGG GCC GGG ATT CTC CTC CAC GTC
HB UPRT F1	GCC GCC ACC ATG GCC TAC CCC TAC GAT GTG CCC GAT TAC GCC
HB UPRT F2	GTC GAC TGG ATC TCG AGC TCA AGC TTC GAA GCC GCC ACC ATG GCC TAC CCC TAC GAT GTG
HB RFPCD V F	GAC GTG GAG GAG AAT CCC GGC CCT TCC GGG ATG AGC GAG CTG ATC AAG GAG AAC ATG CAC
HB RFP CD V R	CAC ATC GTA GGG GTA GGC CAT GGT GGC GGC TTC GAA GCT TGA GCT CGA GAT CCA GTC GAC
HB hGSK3F1	GGAAGGTGACCACAGTCGTA
HB hGSK3R1	ATGGCGACTAGTTCCCTGGT
HB hTUBBF2	CGAGAAGAATACCCTGATCGCA
HB hTUBBR2	CCACTCATGGTGGCTGAGAC
HB hGAPDHF1	CCCACTCCTCCACCTTTGAC
HB hGAPDHR1	GGAGATTCAGTGTGGTGGGG
HB hCX3CL1F1	CACGGTGTGACGAAATGCAA
HB hCX3CL1R1	ATCTGCTTCTCGAAGGTGCC
HB hSMAD7 F2	GAAGGGGCAGGTATGATCGG
HB hSMAD7 R2	GGACTGCAAACCTCTCTGCT
HB hSKIL F1	GGGAATTGGCCTTGTTGCTG
HB hSKIL R1	TGCTGTTCTTCAGTGAGTTCCT
HB mPGK1F1	GAGCCAAGTCCGTTGTCCTT
HB mPGK1R1	GAAAGCGGAGGTTTTCCAGC
HB mHPRT1 F1	GGAGTCCTGTTGATGTTGCCA
HB mHPRT1 R1	AAATCAAAAGTCTGGGGACGC
HB mLDHA F1	CCTCTCTGTGGCAGACTTGG
HB mLDHA R1	TGTCTGCGCTCTTCTTCAGG
HB mGAPDH F	GACCACAGTCCATGCCATCA
HB mGAPDH R	GACGGACACATTGGGGGTAG
