# Supplementary figures and images for: Flura-seq identifies organ-specific metabolic adaptations during early metastatic colonization
Source: eLife journal article supplement (doi:10.7554/elife.43627), 2019-03-25

**A**

Genes upregulated vs MFP

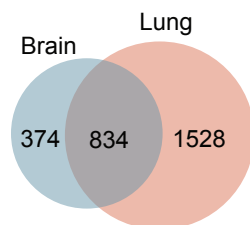

Genes downregulated vs MFP

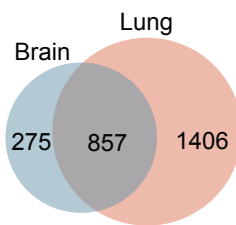**B**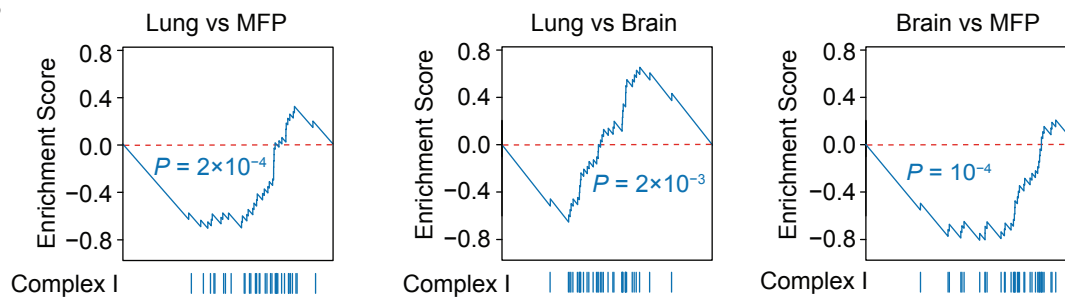**C**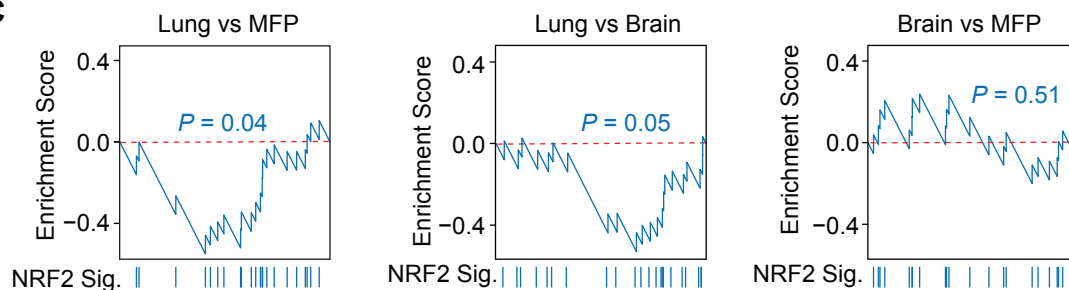

Supplement: supp [file elife-43627-supp-v1.zip › elife_poa_e43627_Figure_5_figure_supplement_1.pdf]

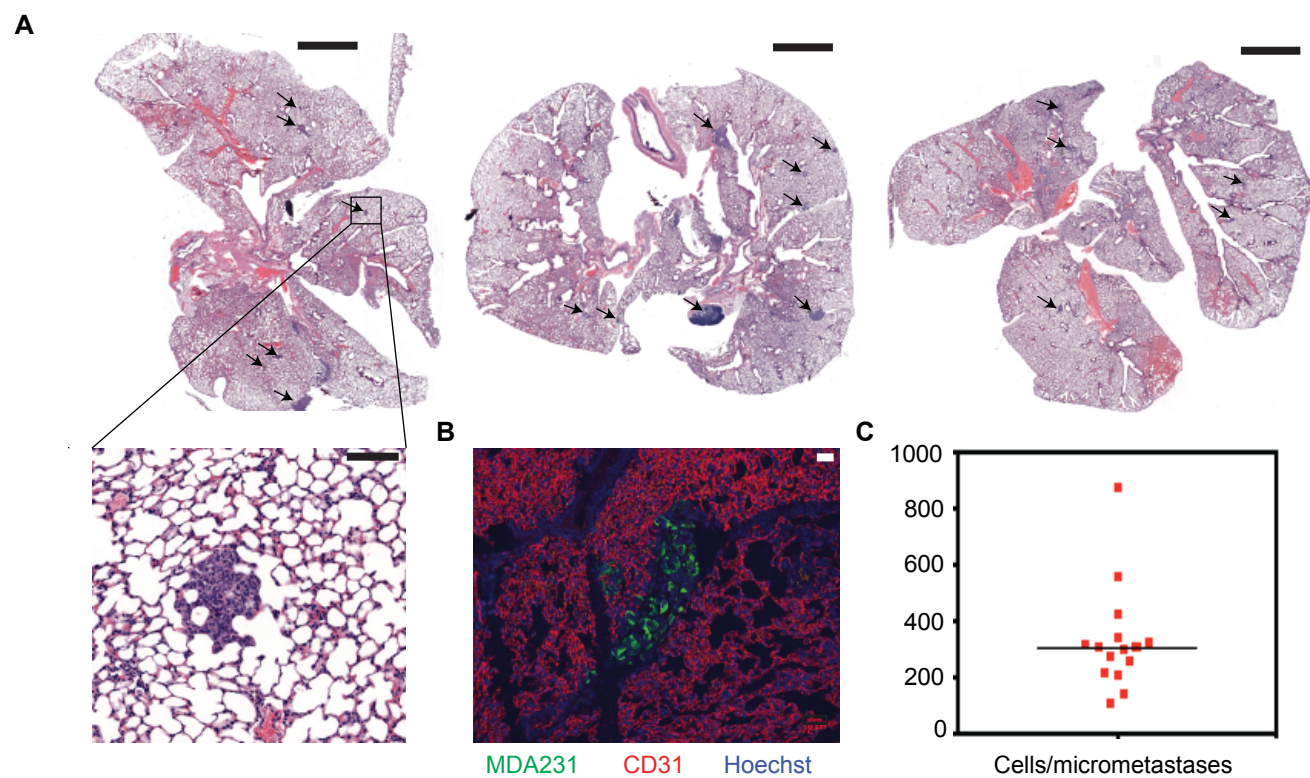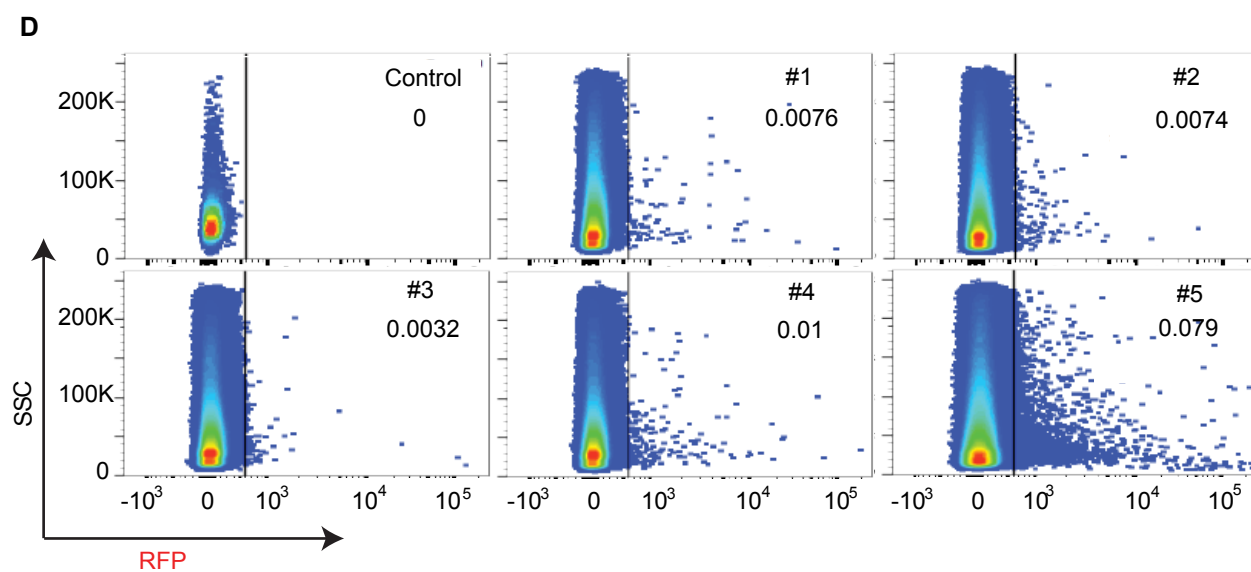

**E**

| Mouse   | No. of RFP+ cells | No. of DAPI-single cells | % RFP+ cells | Estimated RFP+ cells in a lung |
|---------|-------------------|--------------------------|--------------|--------------------------------|
| Control | 0                 | 20075                    | 0            | 0                              |
| # 1     | 109               | 1428697                  | 0.0076       | 11400                          |
| # 2     | 192               | 2597451                  | 0.0074       | 11100                          |
| # 3     | 119               | 3733495                  | 0.0032       | 4800                           |
| # 4     | 208               | 2087181                  | 0.01         | 15000                          |
| # 5     | 2502              | 3166965                  | 0.079        | 118500                         |

Supplement: supp [file elife-43627-supp-v1.zip › elife_poa_e43627_Figure_3_figure_supplement_1.pdf]

**A**

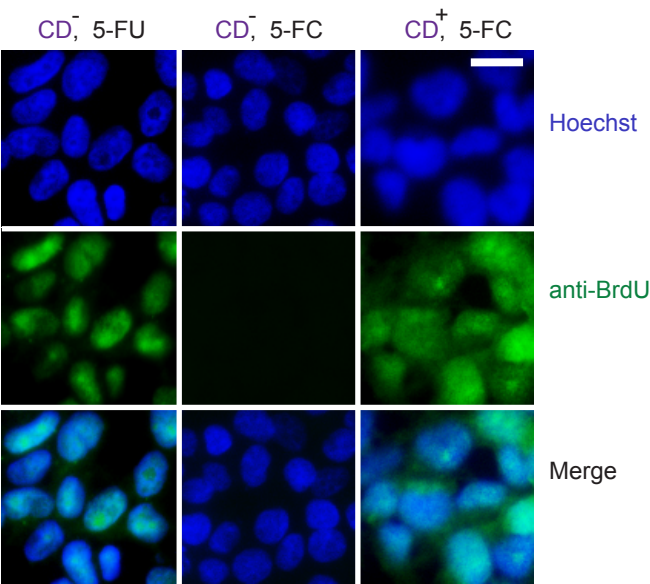

**B**

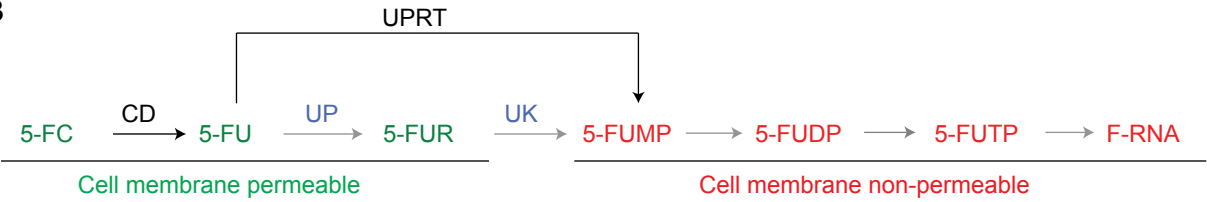

Supplement: supp [file elife-43627-supp-v1.zip › elife_poa_e43627_Figure_1_figure_supplement_1.pdf]

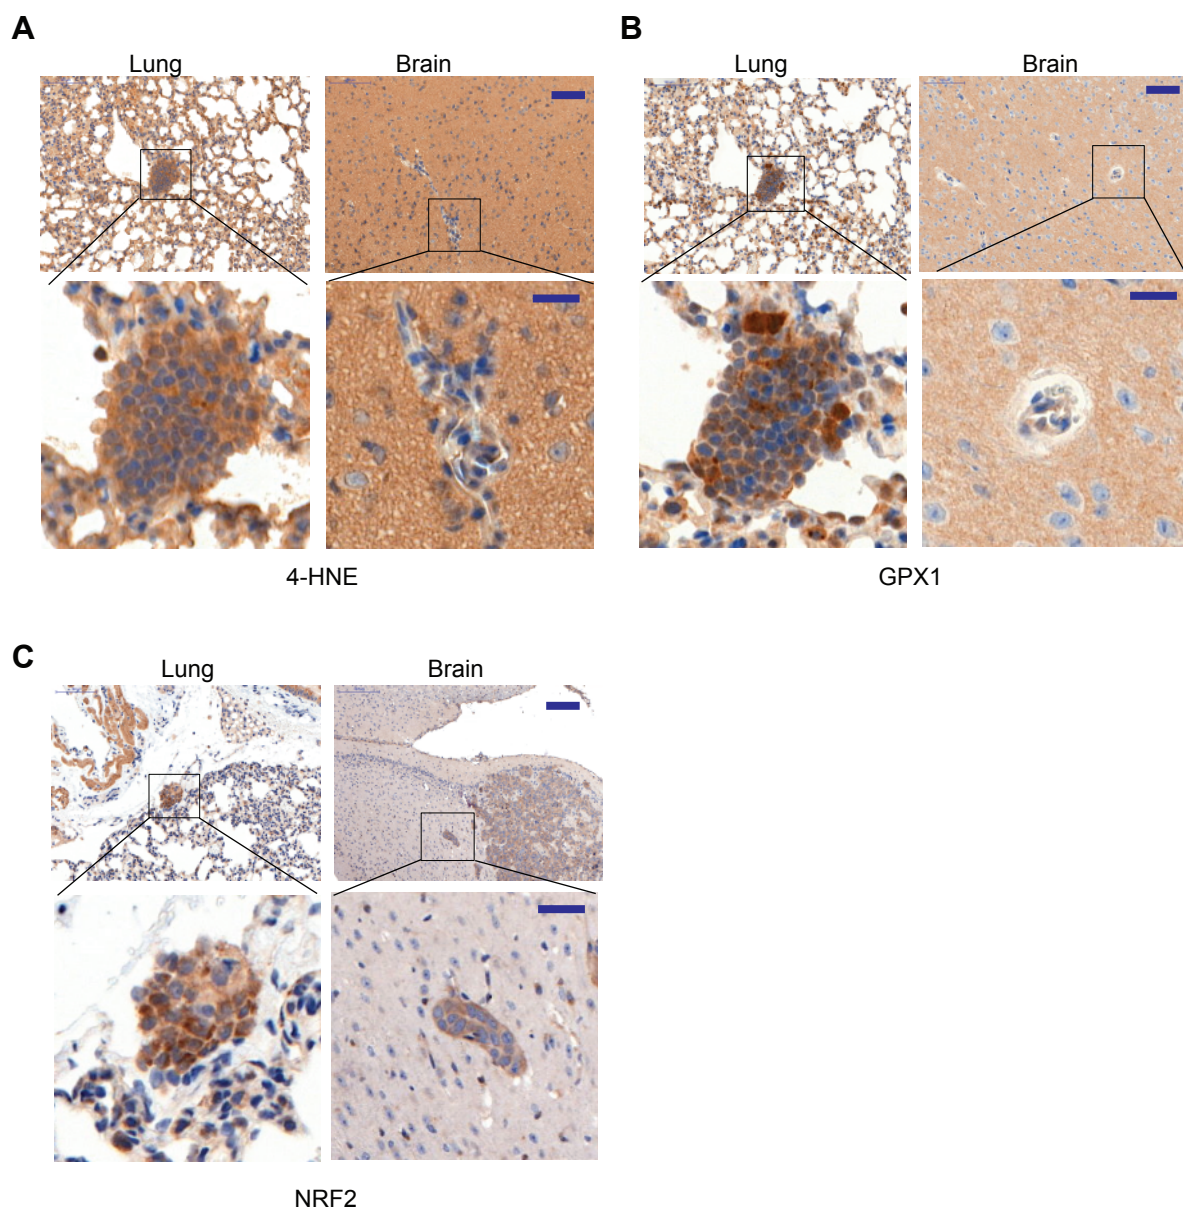

Supplement: supp [file elife-43627-supp-v1.zip › elife_poa_e43627_Figure_5_figure_supplement_2.pdf]
